# Supplementary material
Source: PubMed Central journal article supplement (PMC8260459)

## Table of Contents

|                                                                                                      |     |
|------------------------------------------------------------------------------------------------------|-----|
| Overview Schemes .....                                                                               | 2   |
| Synthesis and Proposed Mechanisms of Limonin Ring Distorted Derivatives .....                        | 2   |
| Synthesis of Derivatives for Structure-Activity Relationship Studies .....                           | 21  |
| Supplementary Figures .....                                                                          | 23  |
| Full Set of CtD Compounds .....                                                                      | 24  |
| Comparison of Complexity Metrics of Limonin Set with Various Small Molecule Compound Libraries ..... | 27  |
| Comparison of Diversity Metrics of Limonin Set with Various Small Molecule Compound Libraries .....  | 34  |
| Cell Culture Studies .....                                                                           | 41  |
| Full Set SAR derivatives and Intermediates .....                                                     | 47  |
| Mode of Cell Death .....                                                                             | 49  |
| Experimental Procedures .....                                                                        | 51  |
| Methods and Characterization .....                                                                   | 51  |
| Limonin Derivatives Synthesis and Characterization .....                                             | 52  |
| Computational Analyses .....                                                                         | 141 |
| Biological Studies .....                                                                             | 143 |
| Methods .....                                                                                        | 143 |
| Abbreviations .....                                                                                  | 145 |
| References .....                                                                                     | 146 |
| Spectral Data .....                                                                                  | 147 |

## SUPPORTING INFORMATION

## Overview Schemes

## Synthesis and Proposed Mechanisms of Limonin Ring Distorted Derivatives

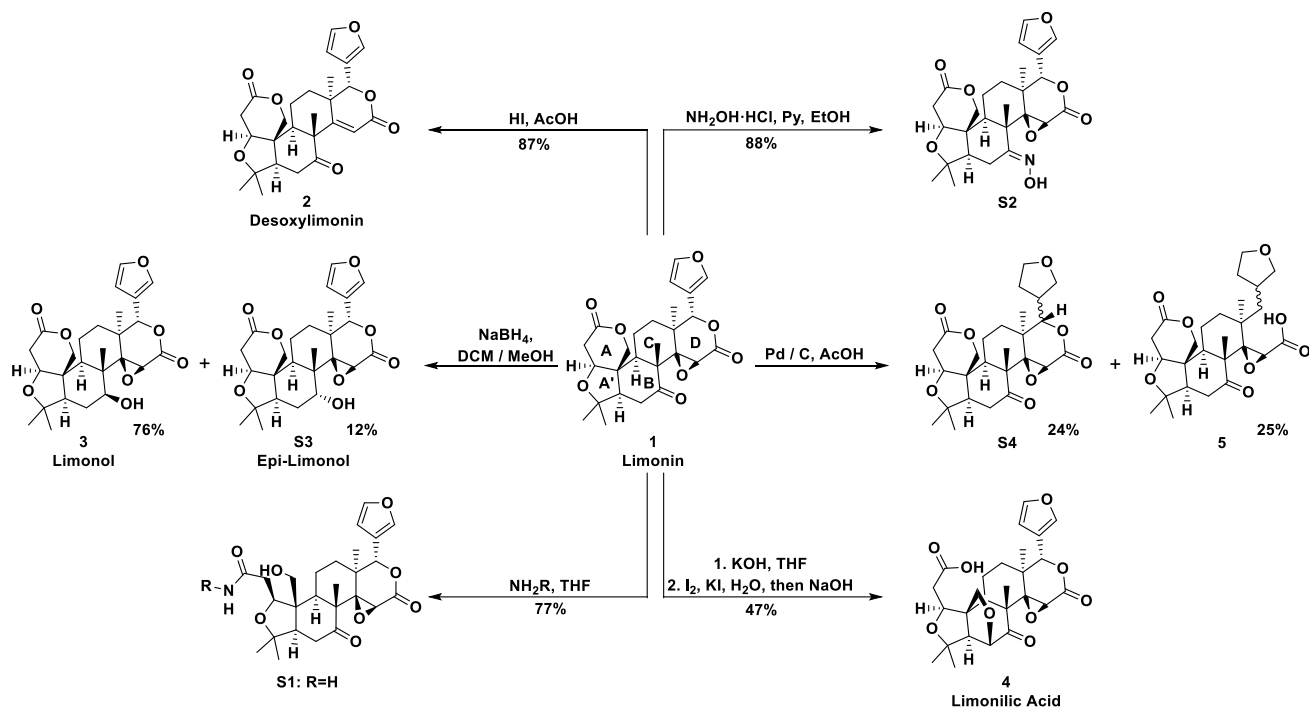

Scheme S1. Some known transformations from limonin (2-5, S1-S4).

## SUPPORTING INFORMATION

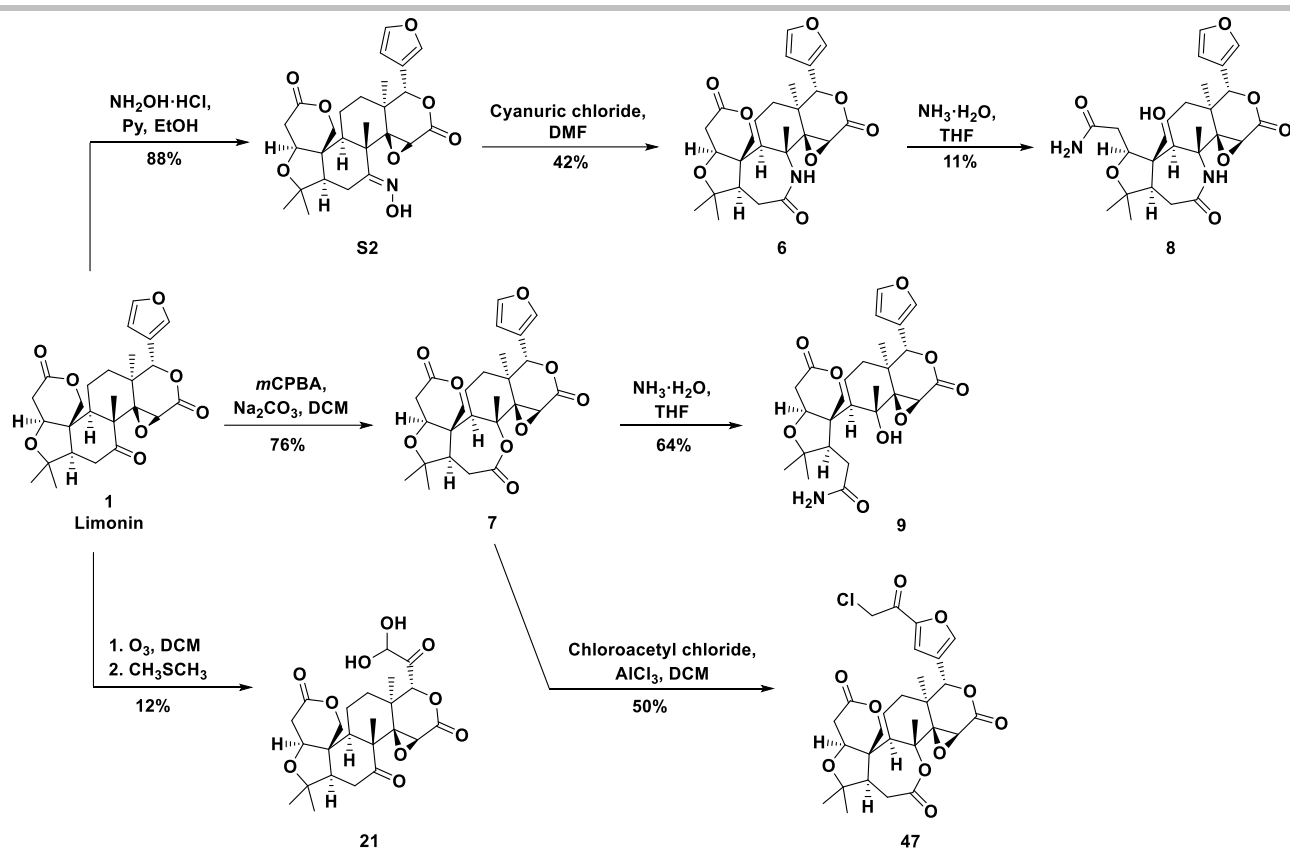

Scheme S2. Limonin Rings B and E manipulations.

## SUPPORTING INFORMATION

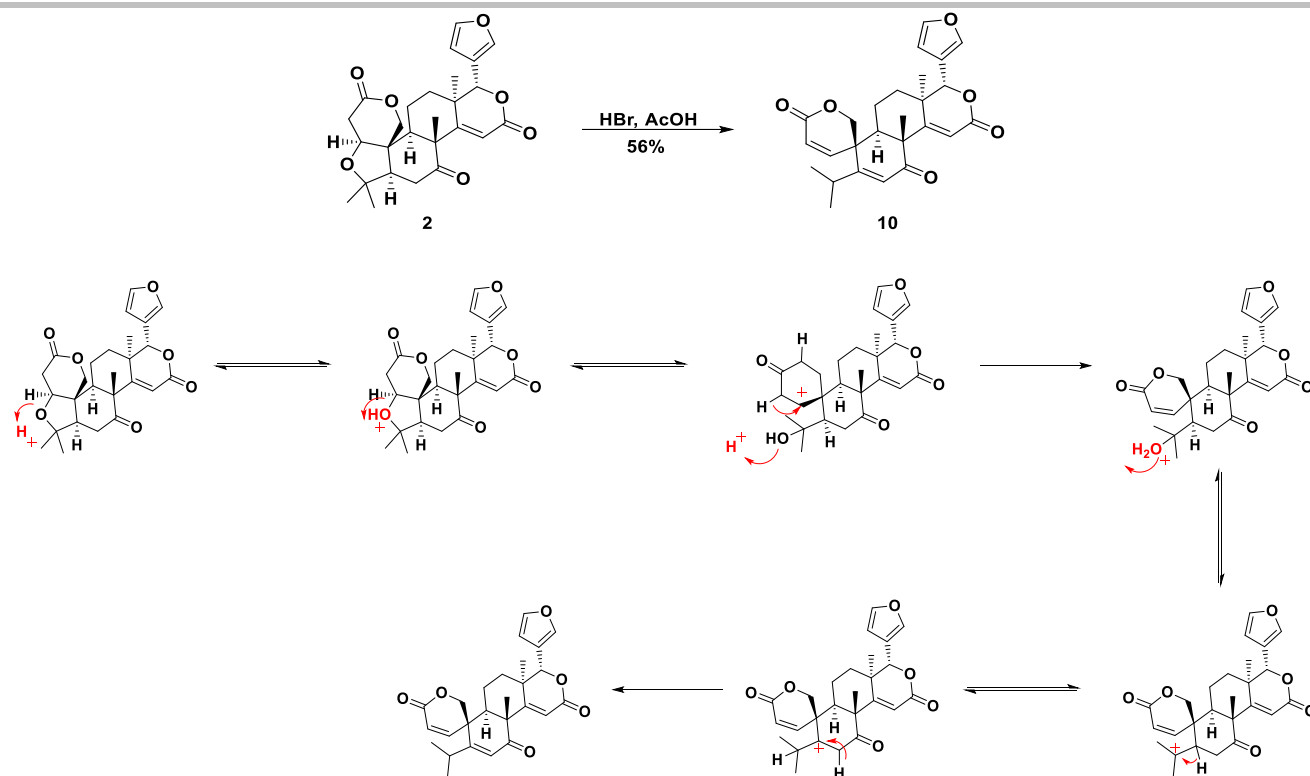

**Scheme S3.** Proposed mechanism for compound **10** synthesis.

## SUPPORTING INFORMATION

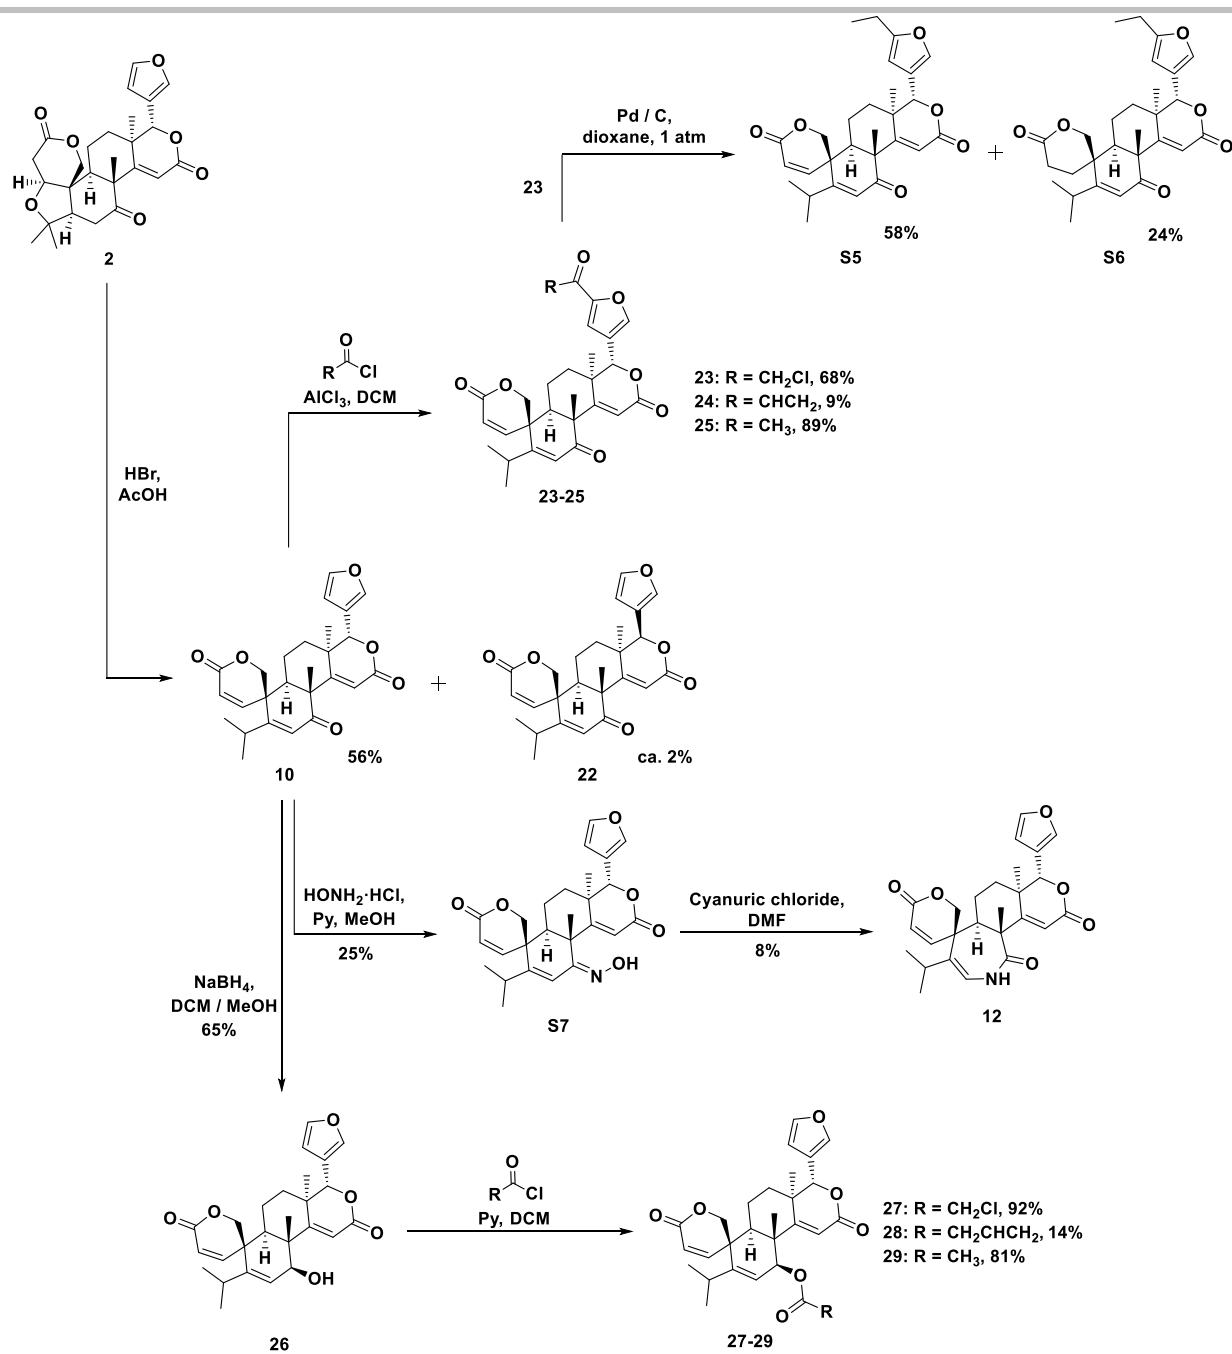

Scheme S4. Desoxylimonin (2) ring A'-cleavage and further manipulations.

## SUPPORTING INFORMATION

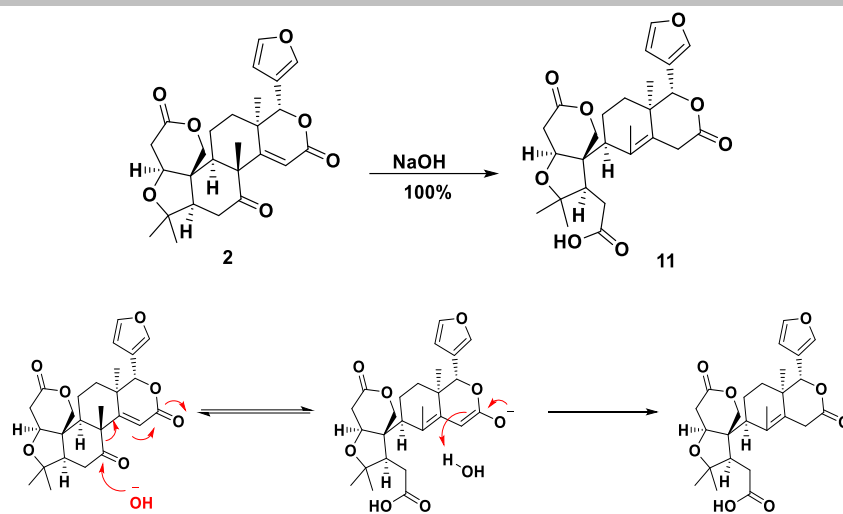

**Scheme S5.** Proposed mechanism for compound **11** synthesis.

## SUPPORTING INFORMATION

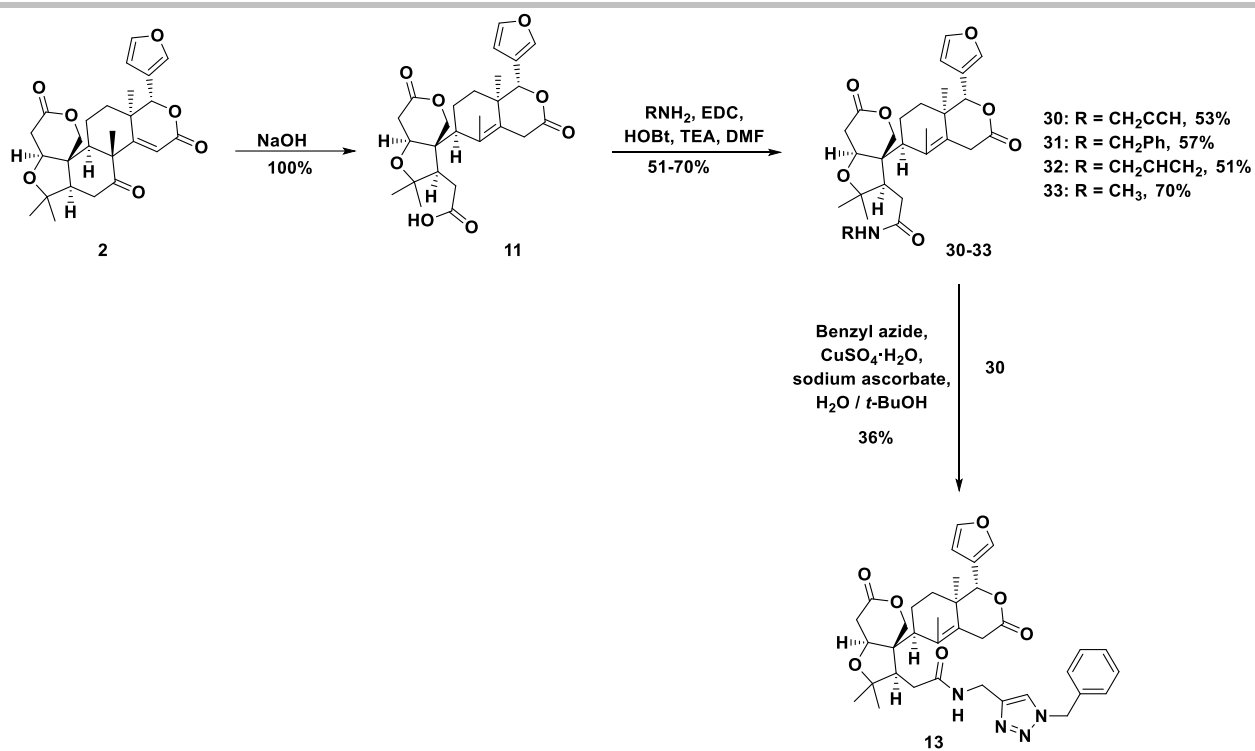

**Scheme S6.** B-ring cleavage of desoxylimonin (2) and further manipulation of 11.

## SUPPORTING INFORMATION

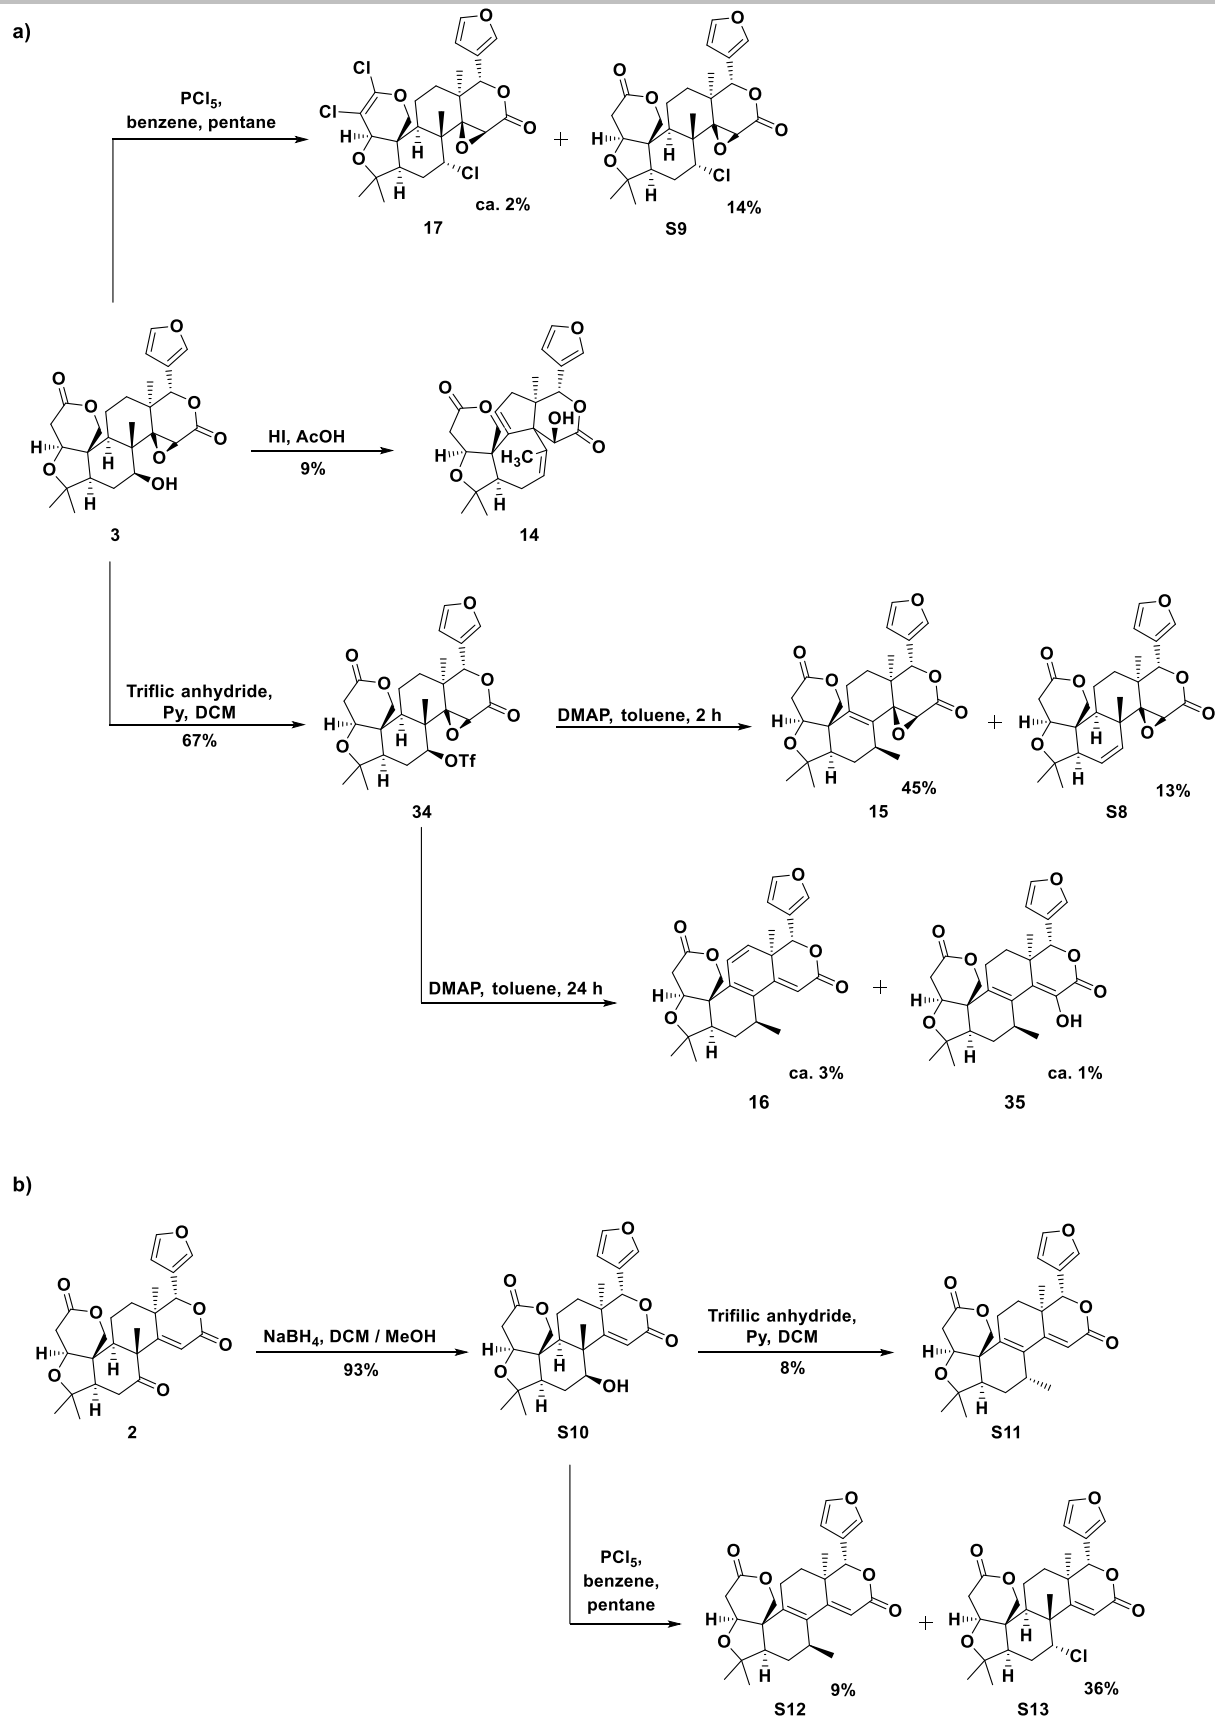Scheme S7. a) Ring Rearrangements of **3**; b) Wagner-Meerwein Rearrangements of **S10**.



## SUPPORTING INFORMATION

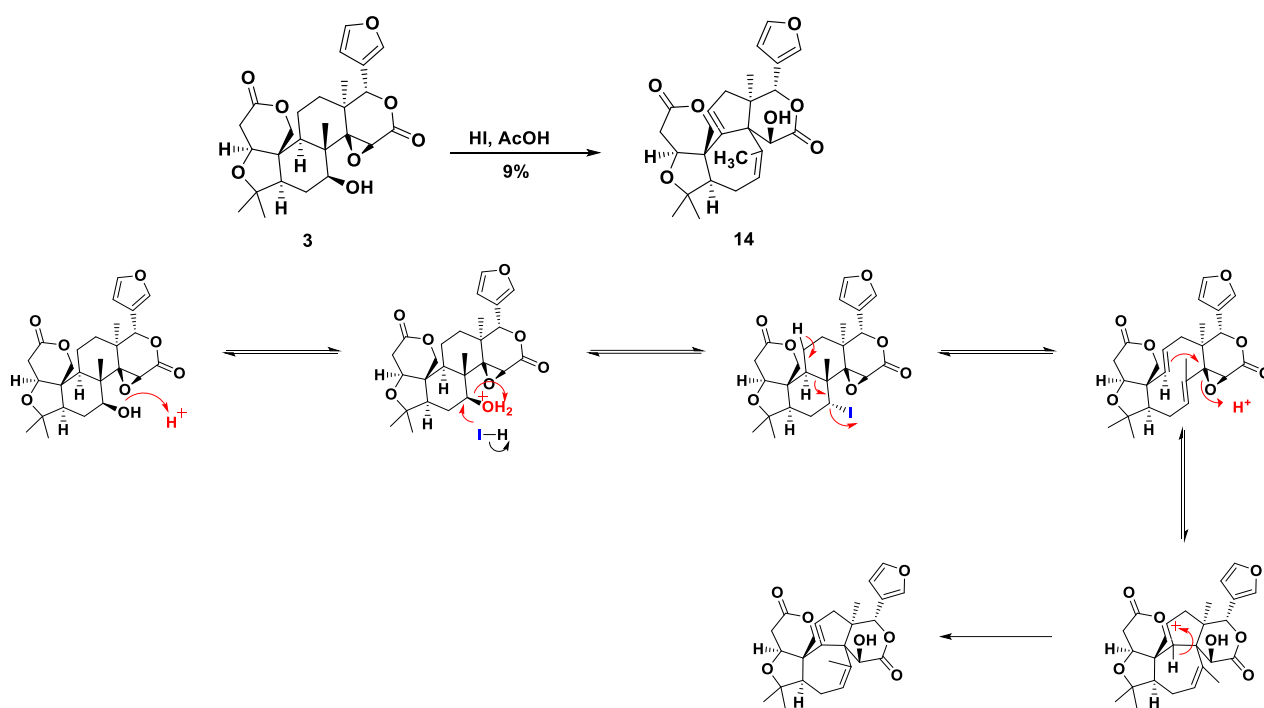

**Scheme S8.** Proposed mechanism for compound **14** synthesis.

## SUPPORTING INFORMATION

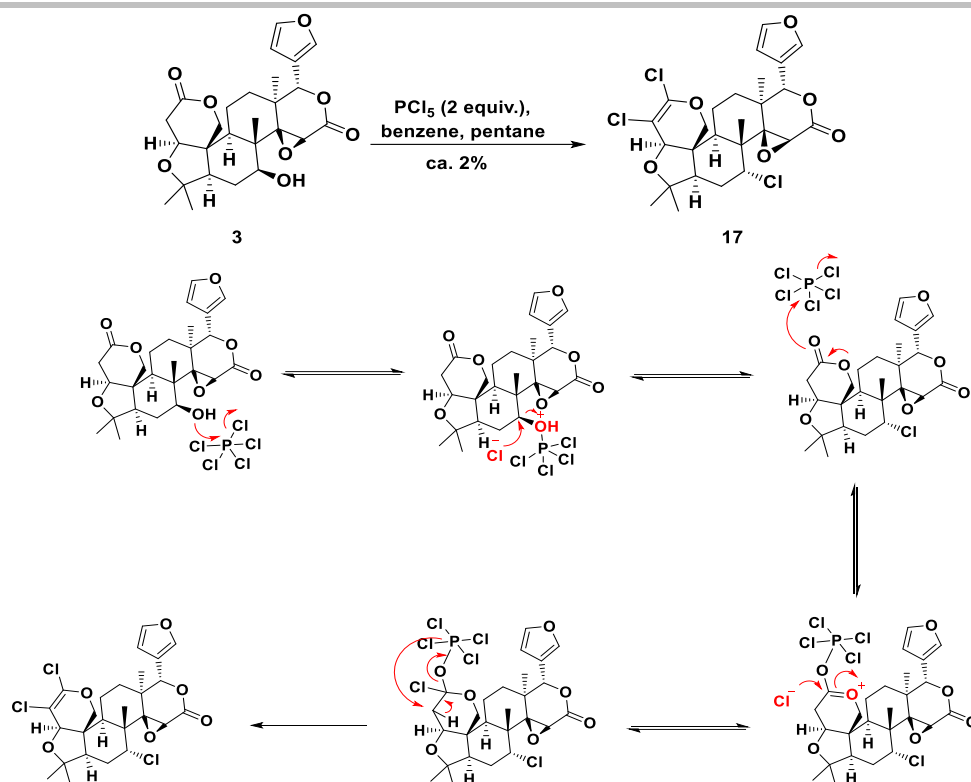

Scheme S9. Proposed mechanism for compound 17 synthesis.

## SUPPORTING INFORMATION

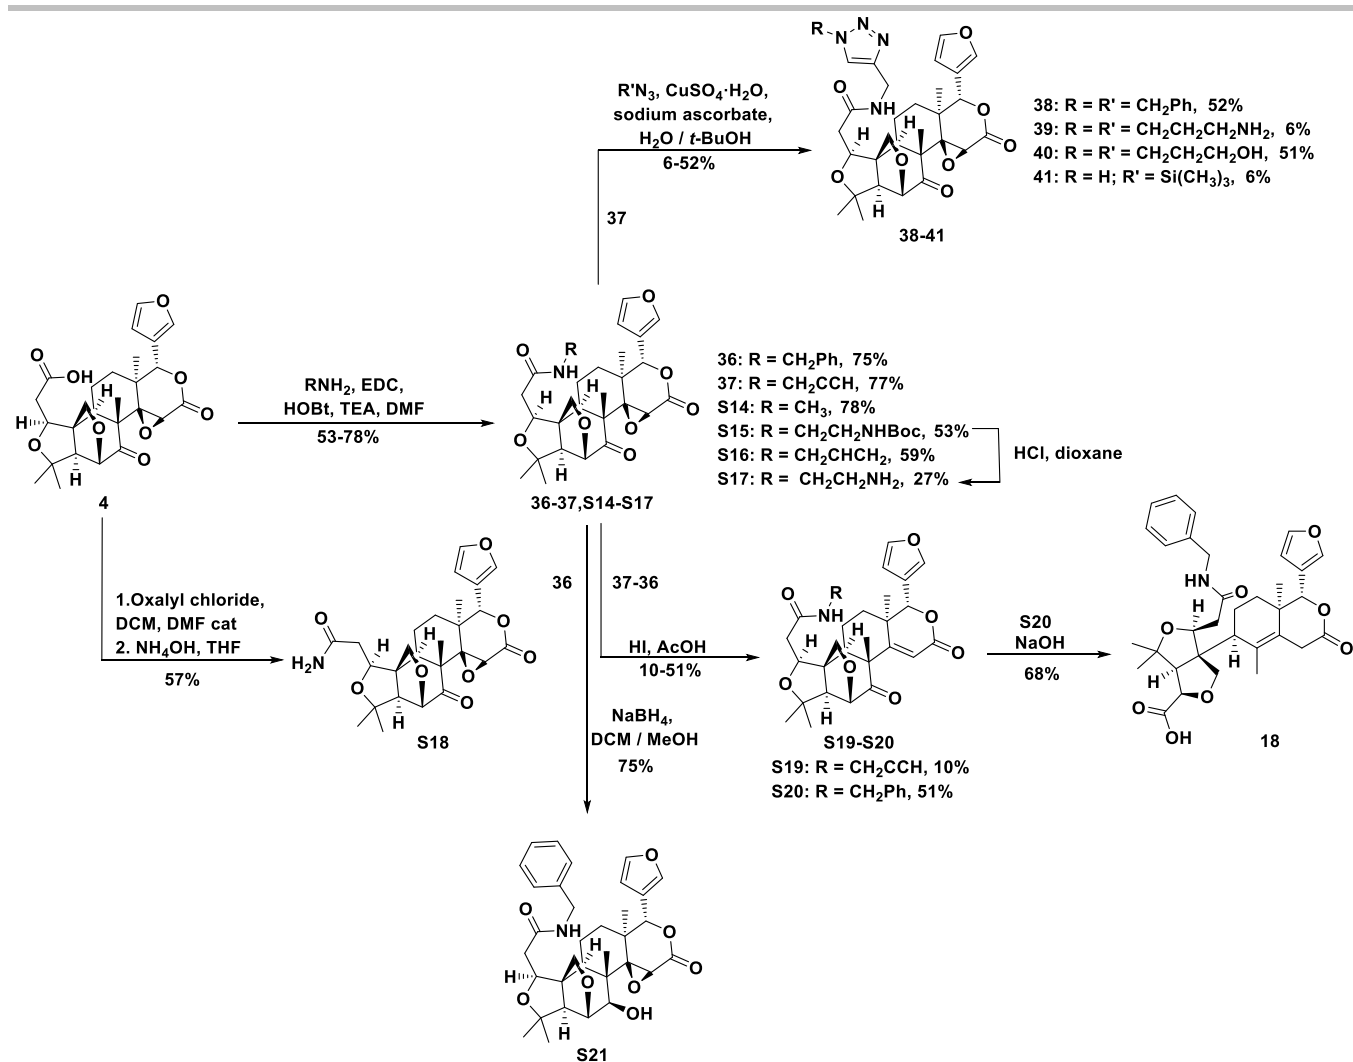Scheme S10. Ring Manipulation of **4**.

## SUPPORTING INFORMATION

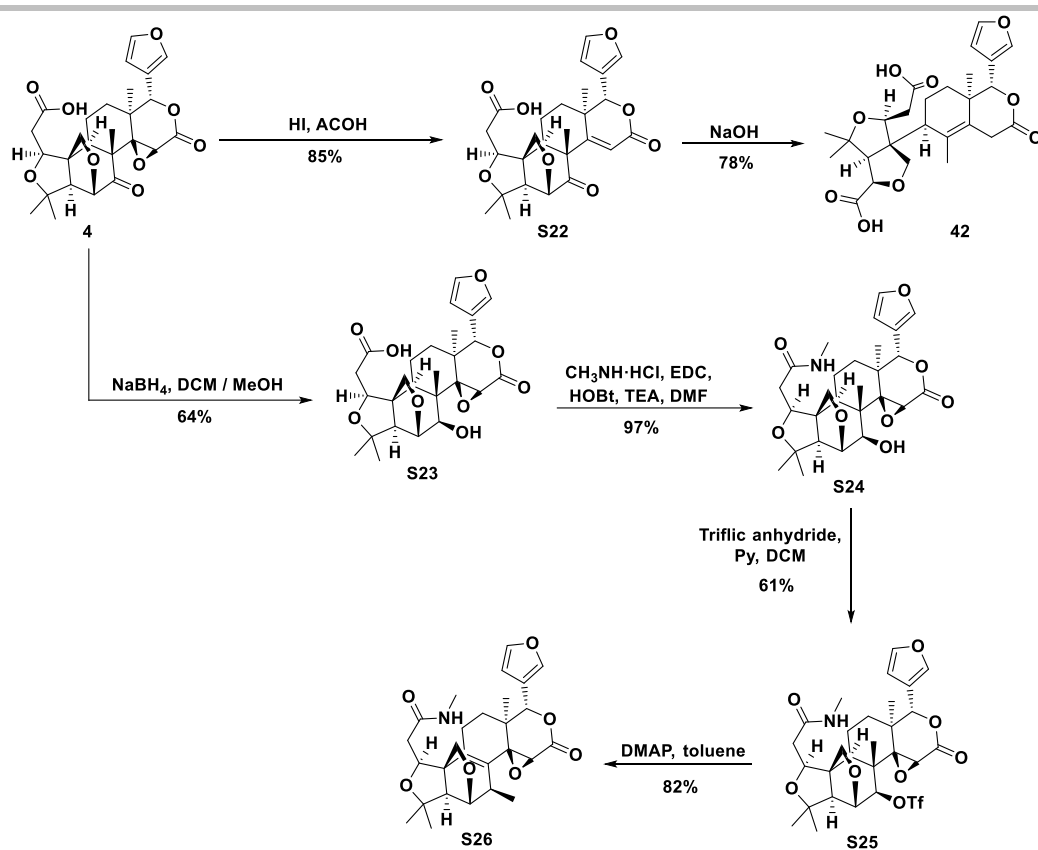

Scheme S11. B-Ring Cleavage and Rearrangement of 4.

## SUPPORTING INFORMATION

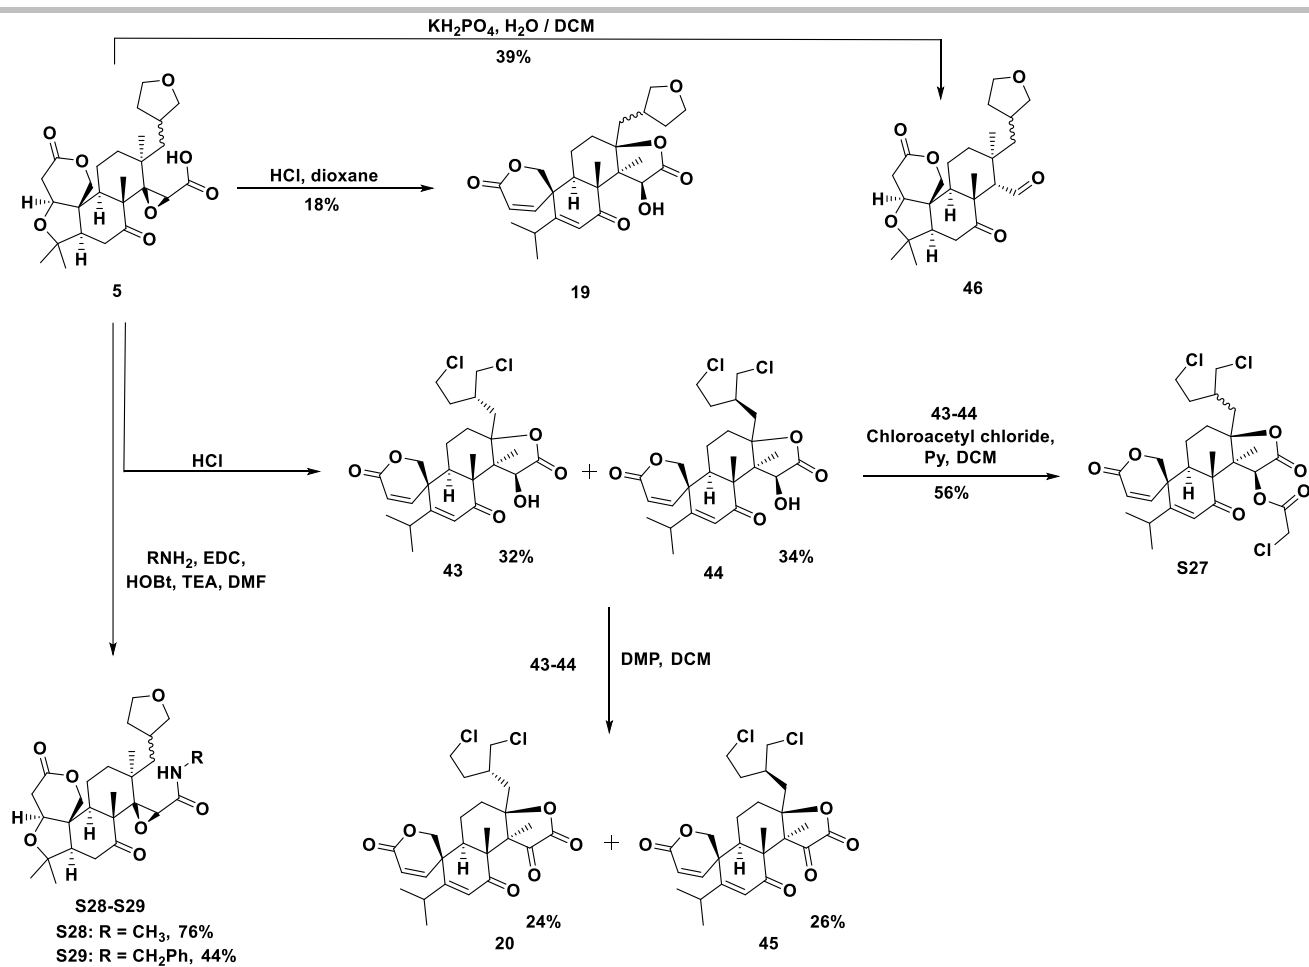

Scheme S12. Ring Manipulation of 5.

## SUPPORTING INFORMATION

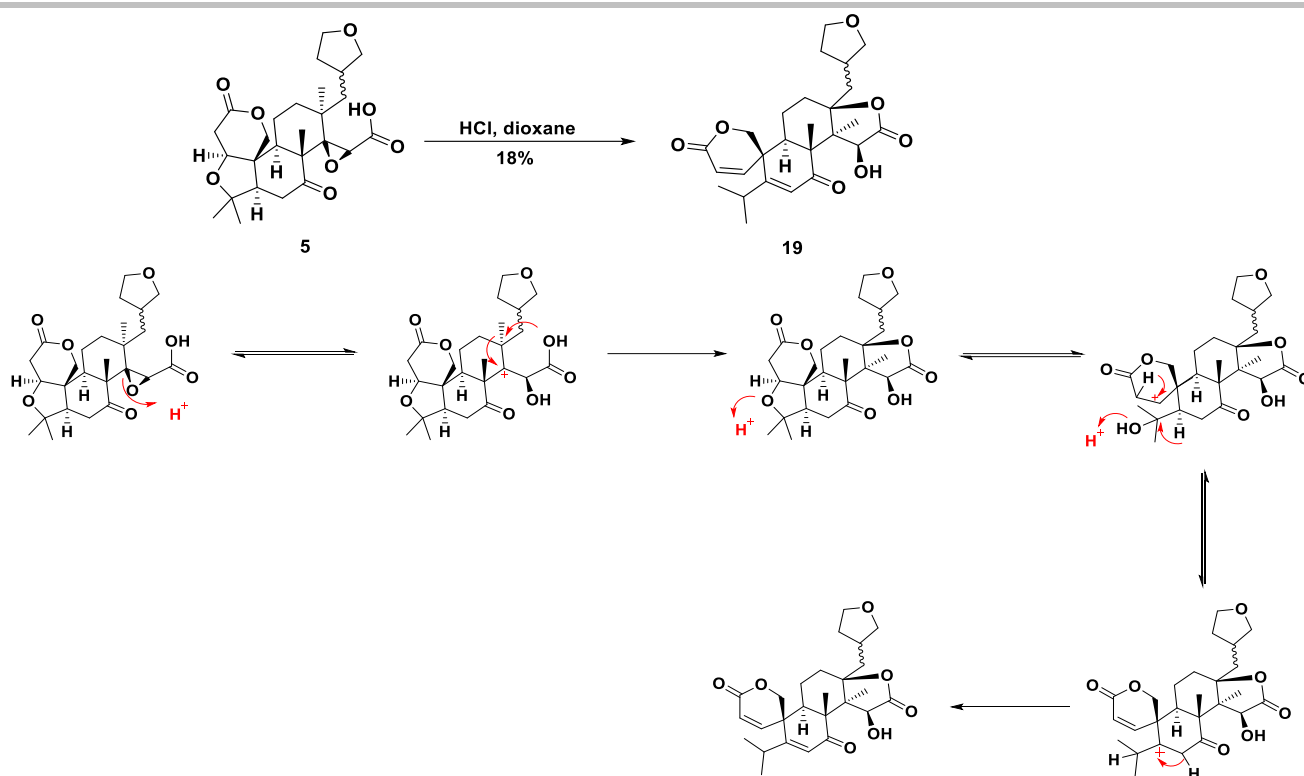

**Scheme S13.** Proposed mechanism for compound **19** synthesis.

## SUPPORTING INFORMATION

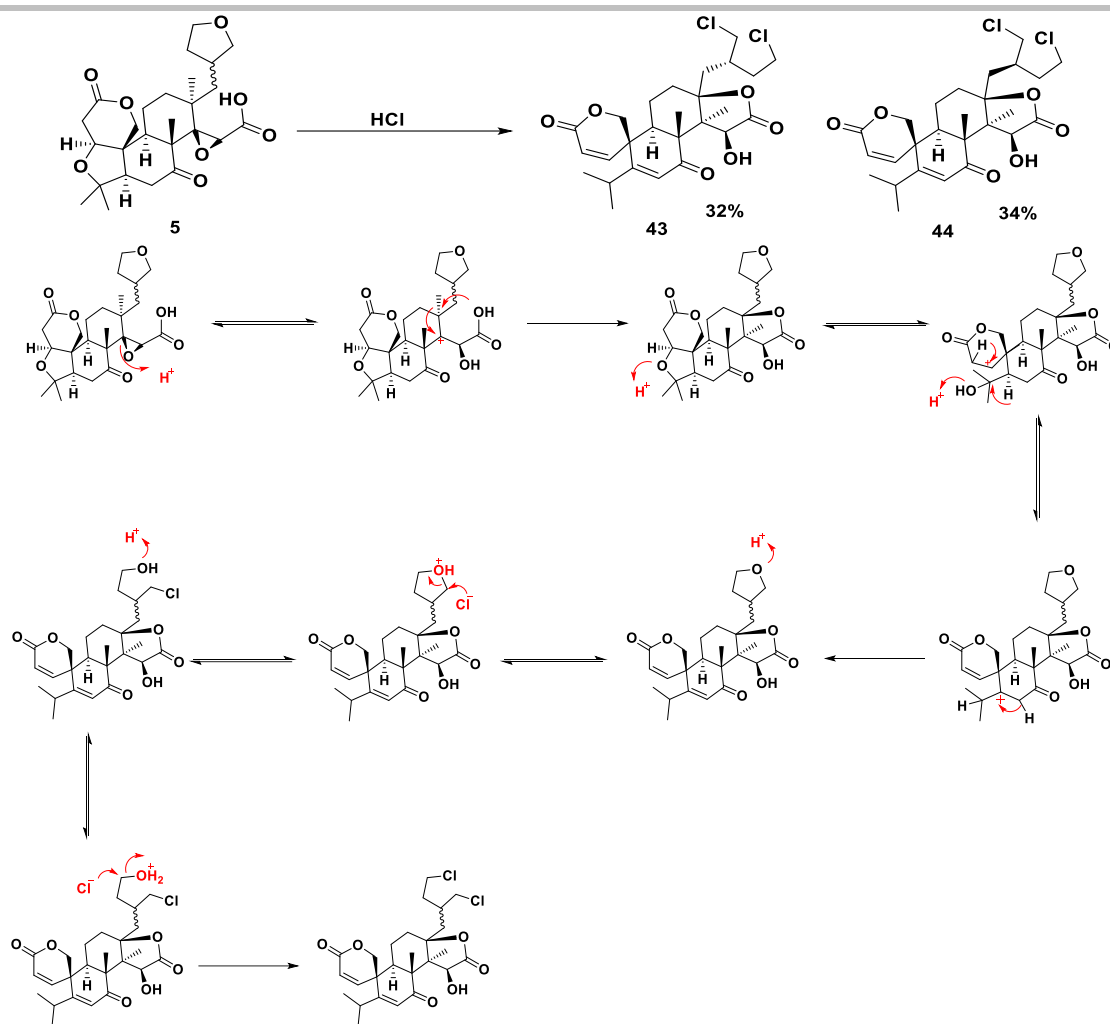

Scheme S14. Proposed mechanism for compounds 43 and 44 synthesis.

## SUPPORTING INFORMATION

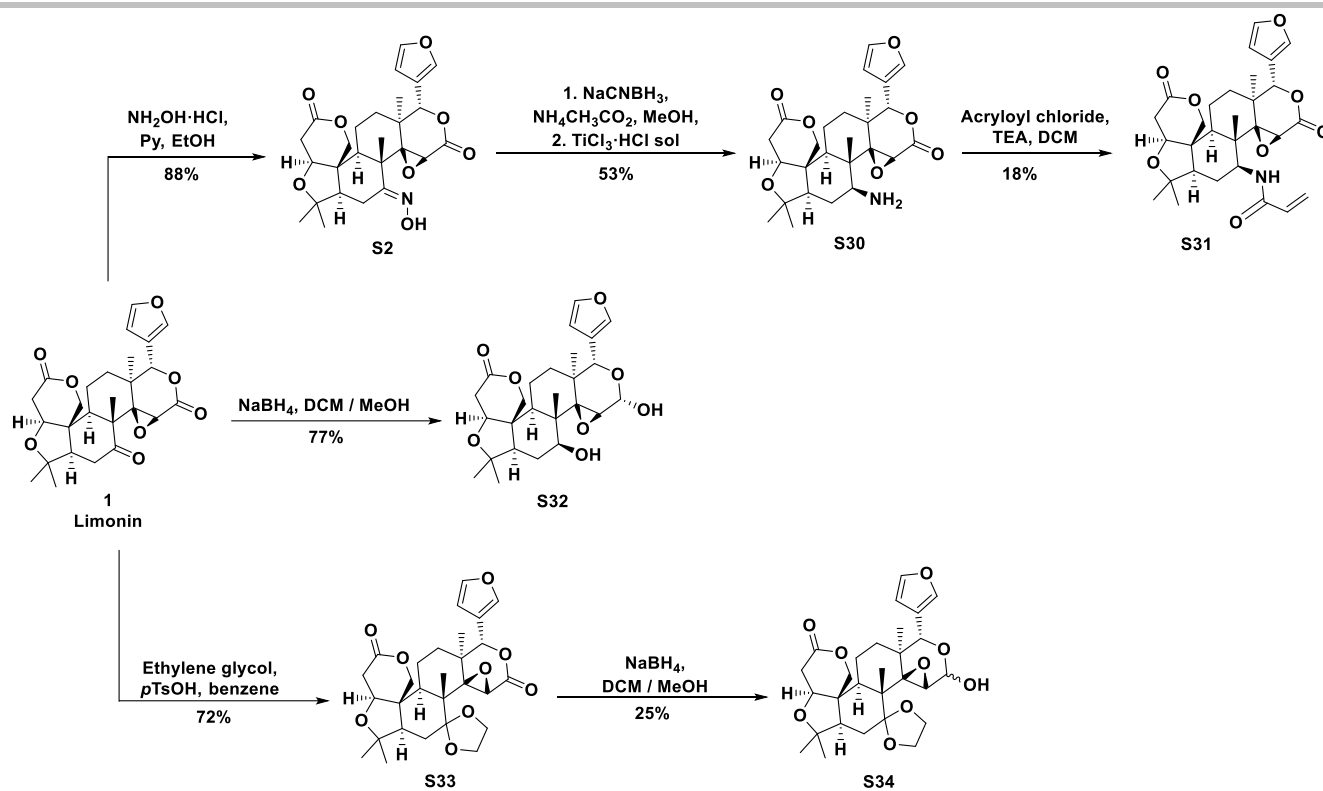

Scheme S15. Limonin B-ring derivatization and fusion.



## SUPPORTING INFORMATION

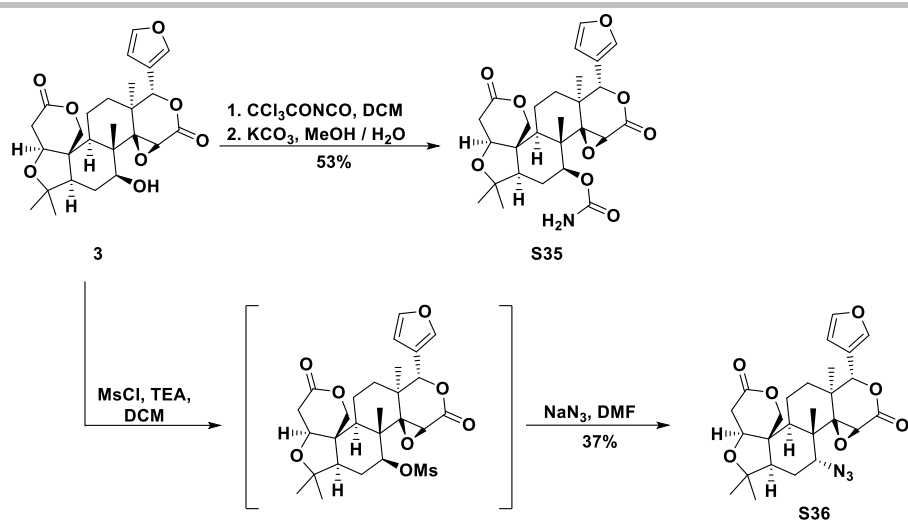

Scheme S16. Derivatization of 3.

## SUPPORTING INFORMATION

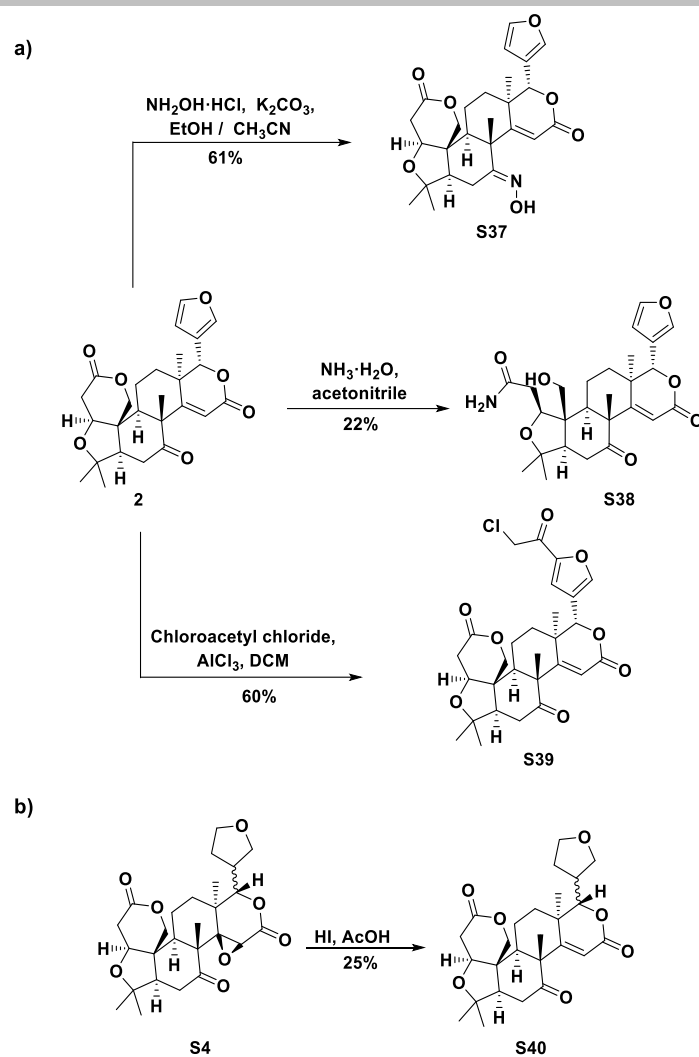

**Scheme S17.** a) Desoxylimonin derivatization; b) Epoxide cleavage of **S4**.

## SUPPORTING INFORMATION

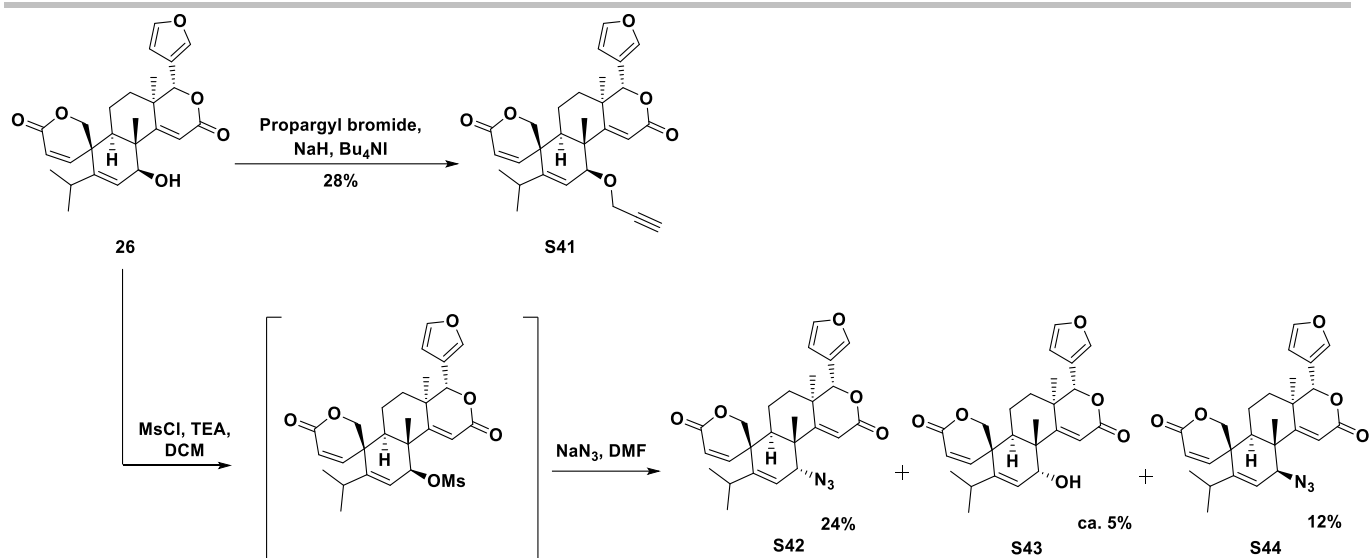

Scheme S18. Derivatization of 26.

## SUPPORTING INFORMATION

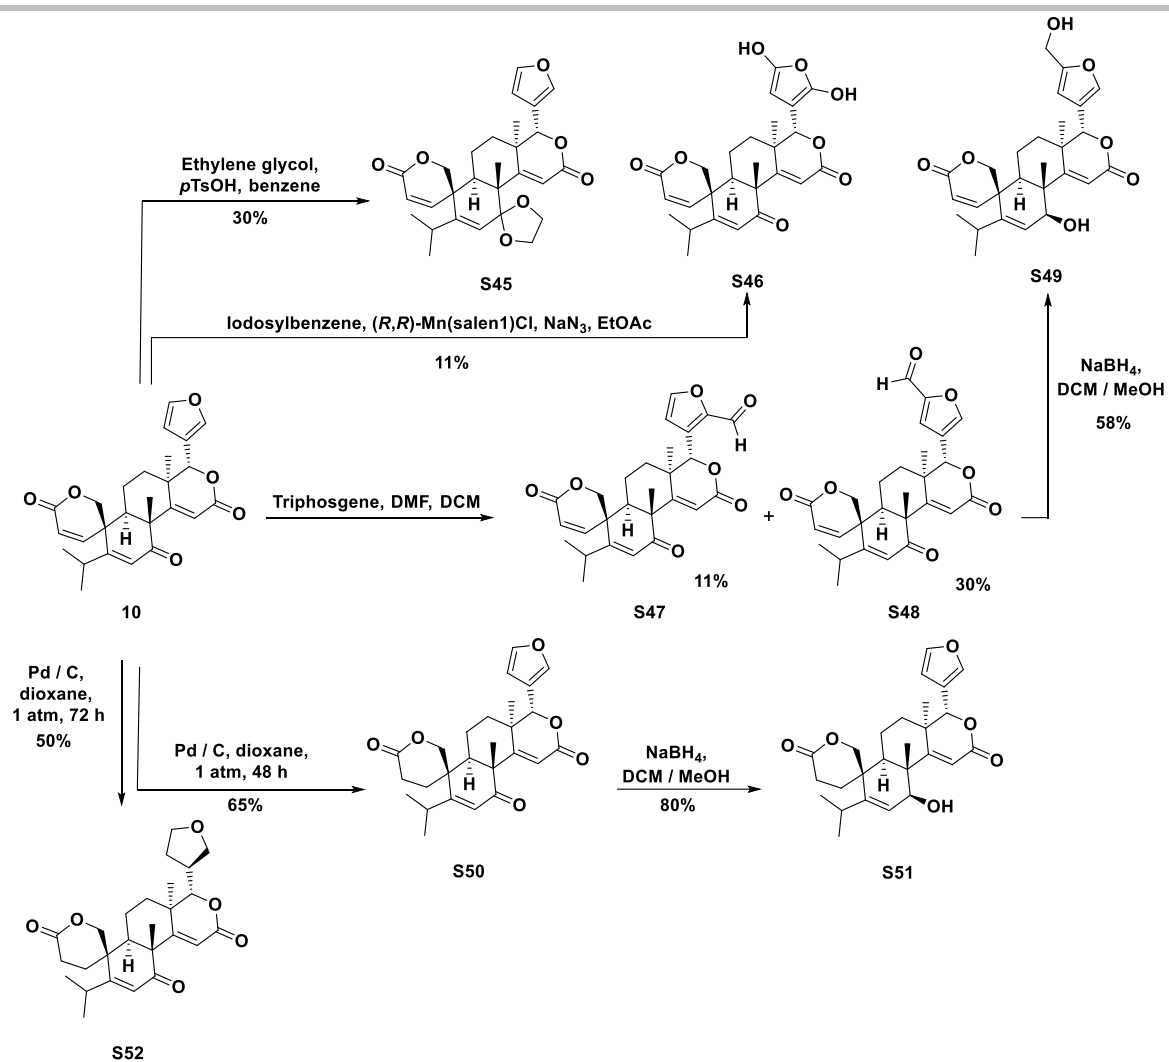

Scheme S19. Derivatization of 10.

## SUPPORTING INFORMATION

## Synthesis of Derivatives for Structure-Activity Relationship Studies

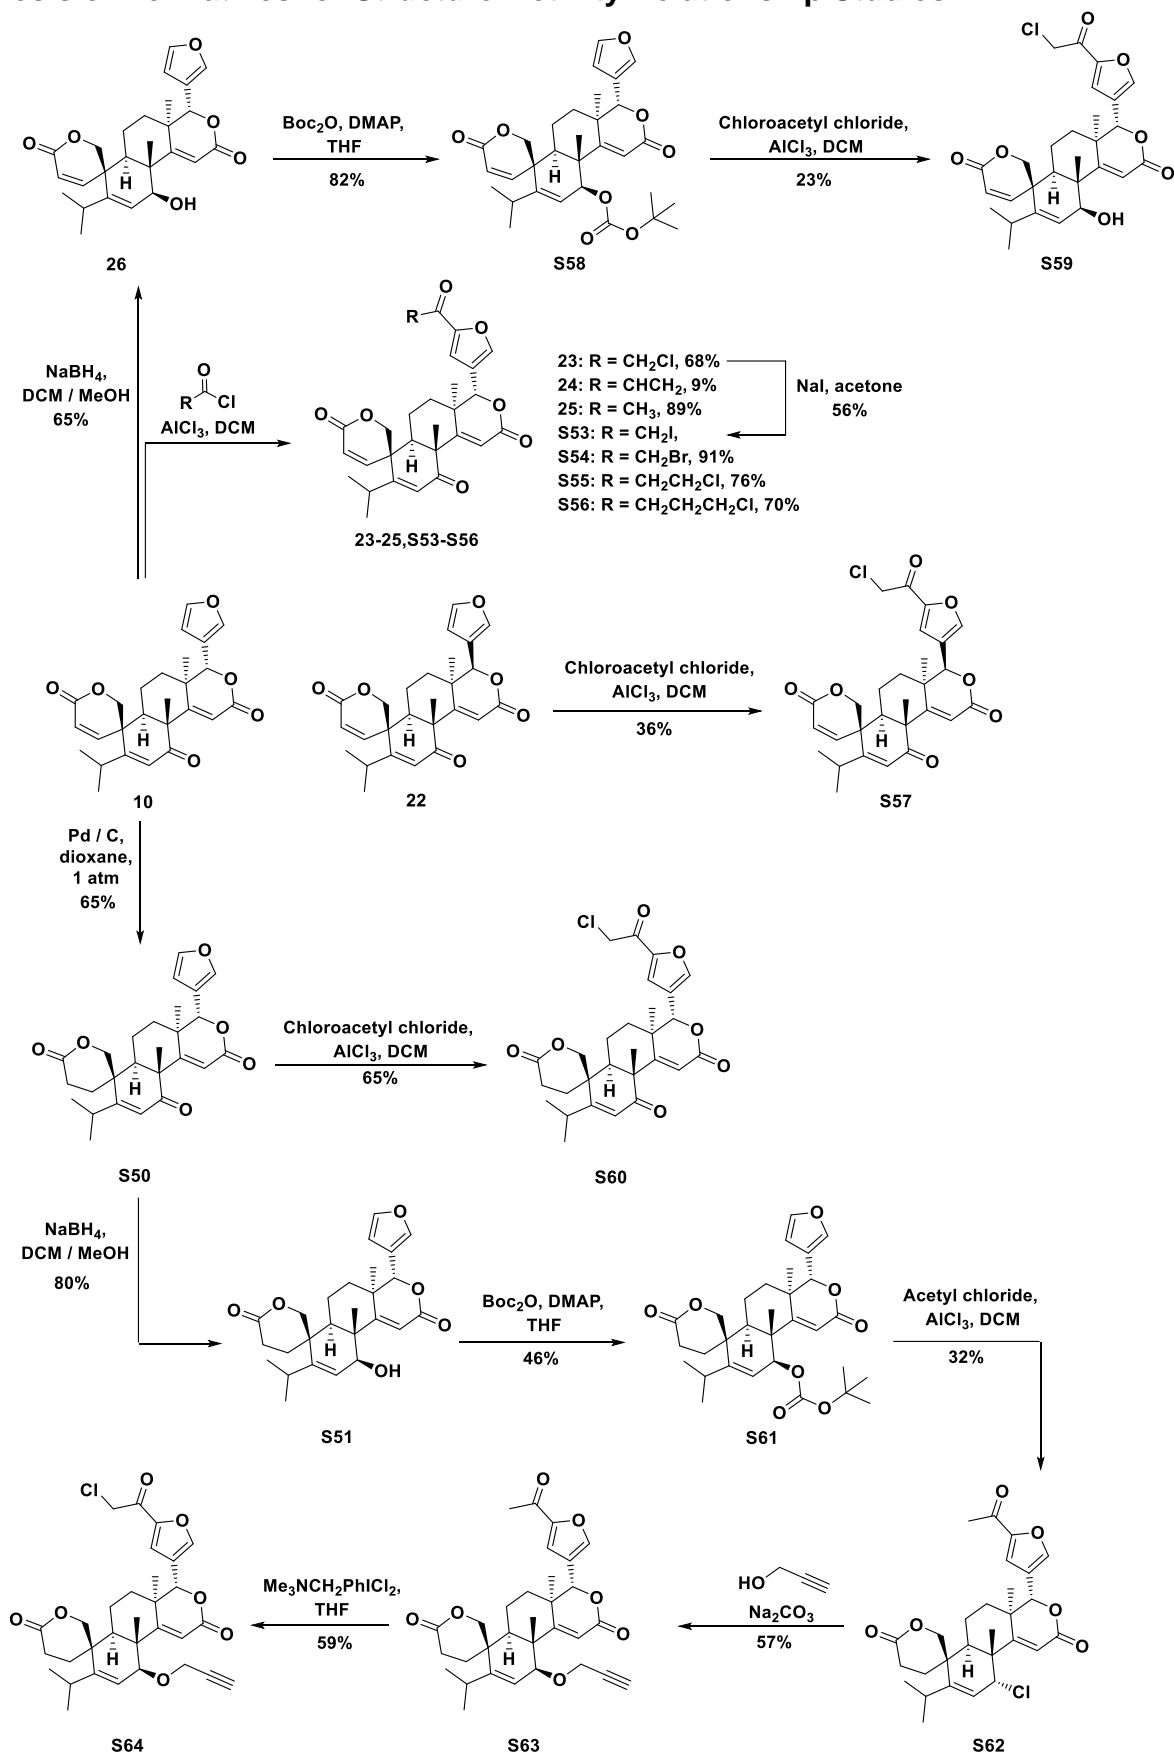

Scheme S20. Structure-activity investigations of compound 23: functional group manipulations of 10.

## SUPPORTING INFORMATION

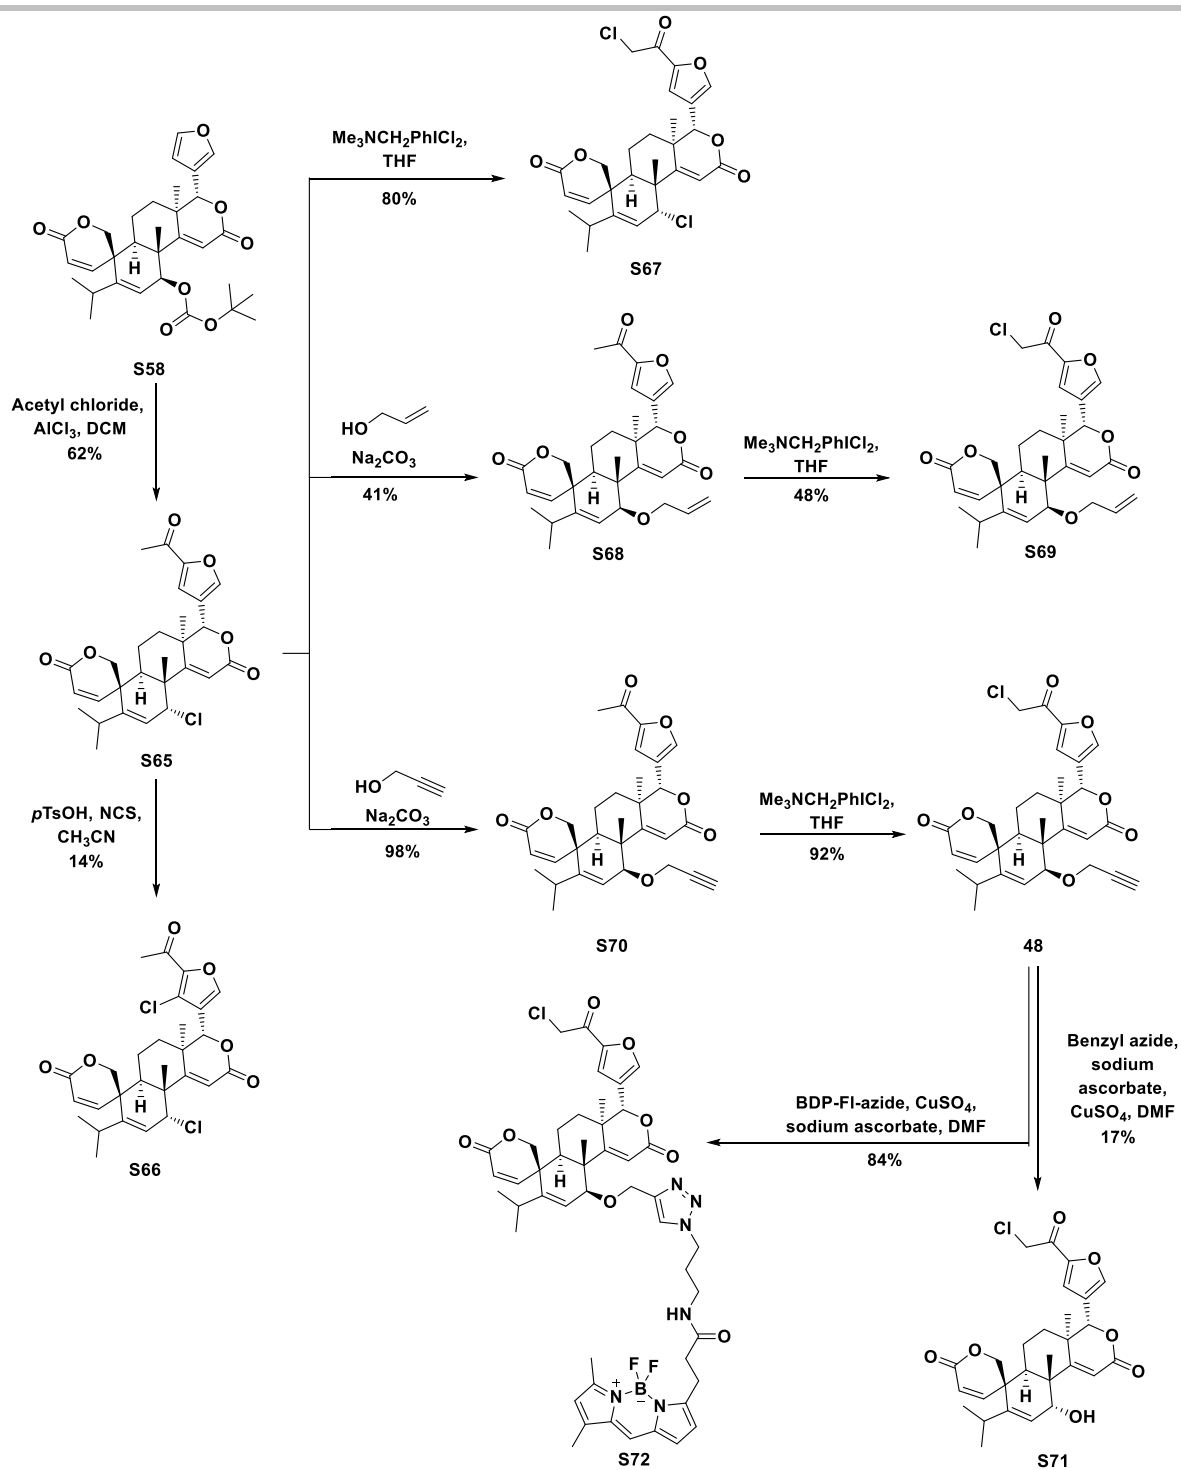

Scheme S21. Structure-activity investigation of compound 23: functional group manipulations of S58.



## SUPPORTING INFORMATION

## Full Set of CtD Compounds

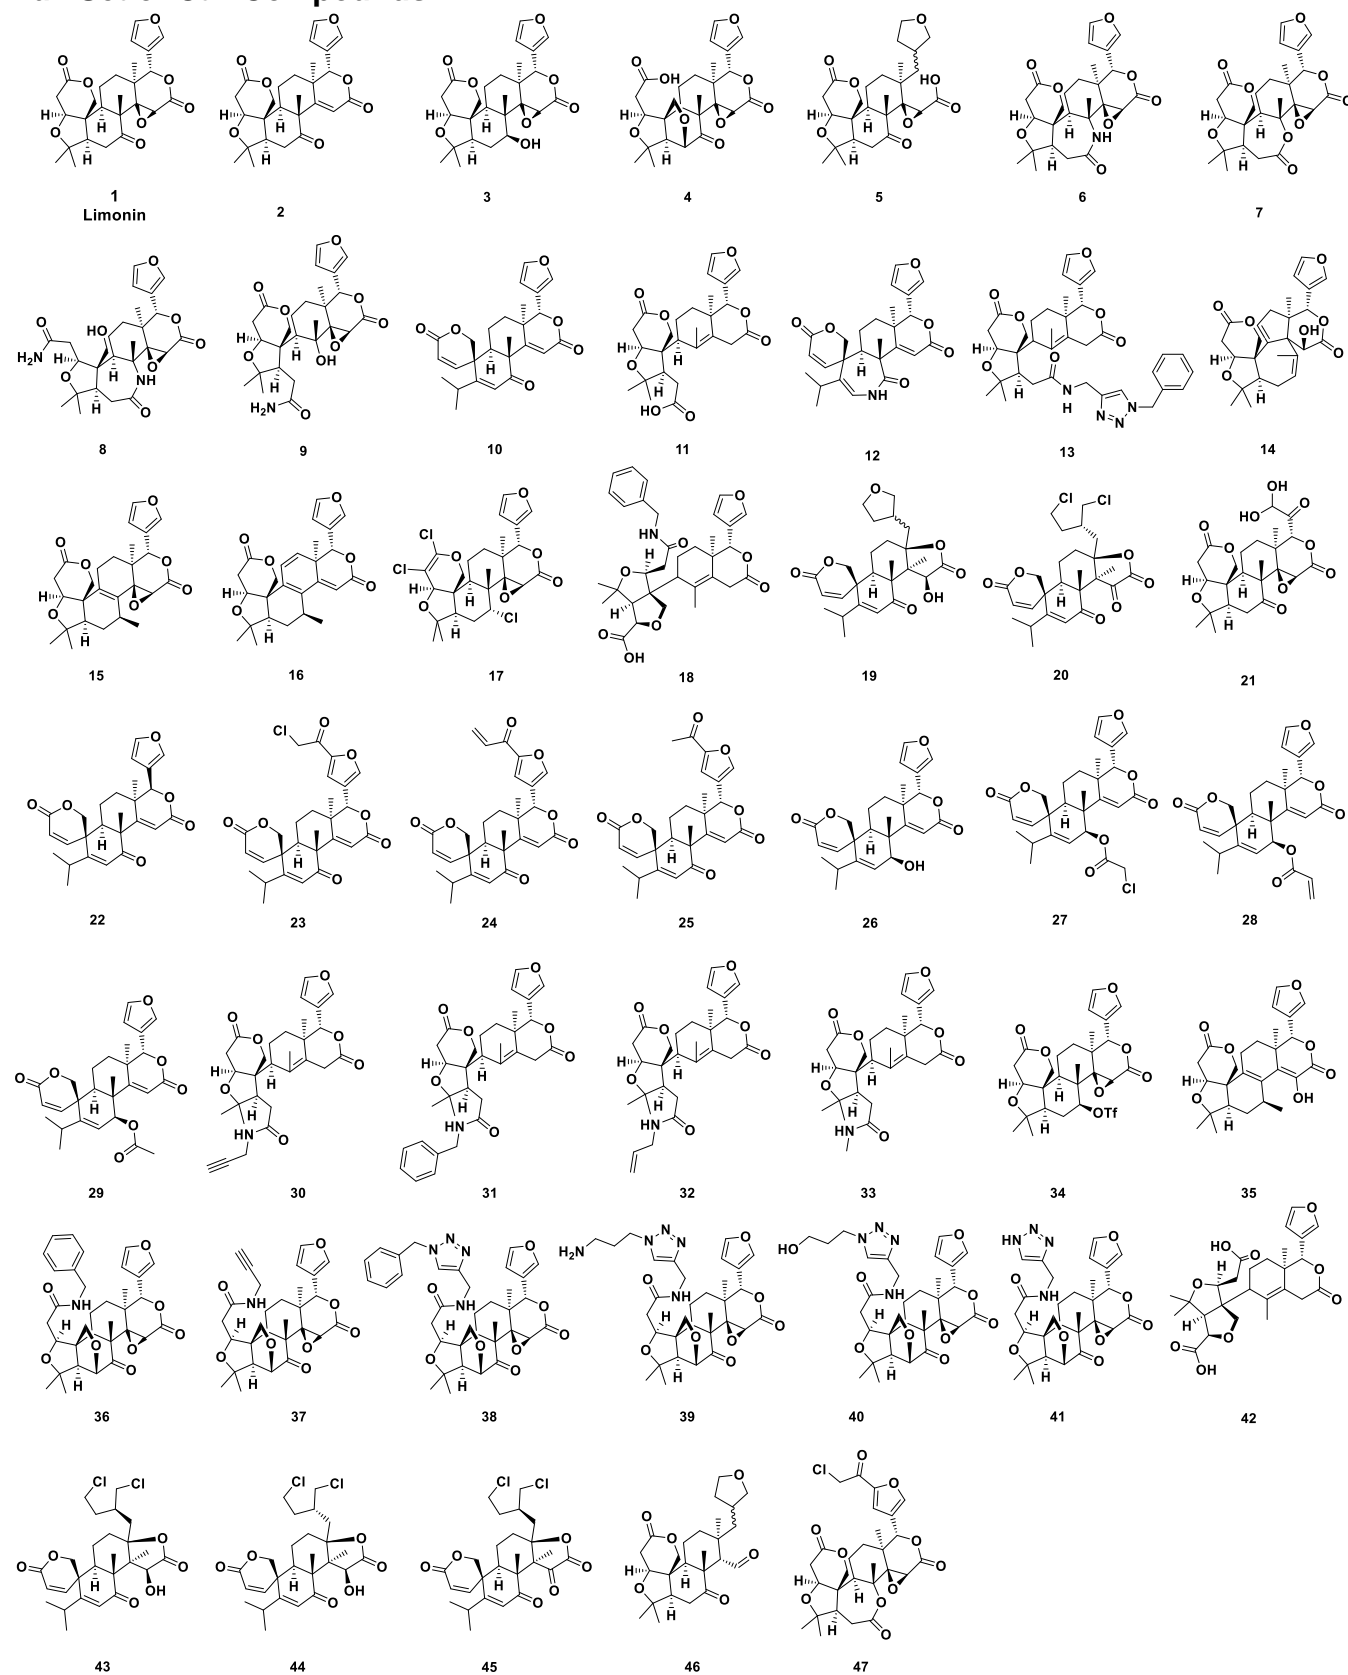

Figure S1. Compounds synthesized by ring distortion of limonin (1-47).



## SUPPORTING INFORMATION

## Full Set of CtD Compounds (continue)

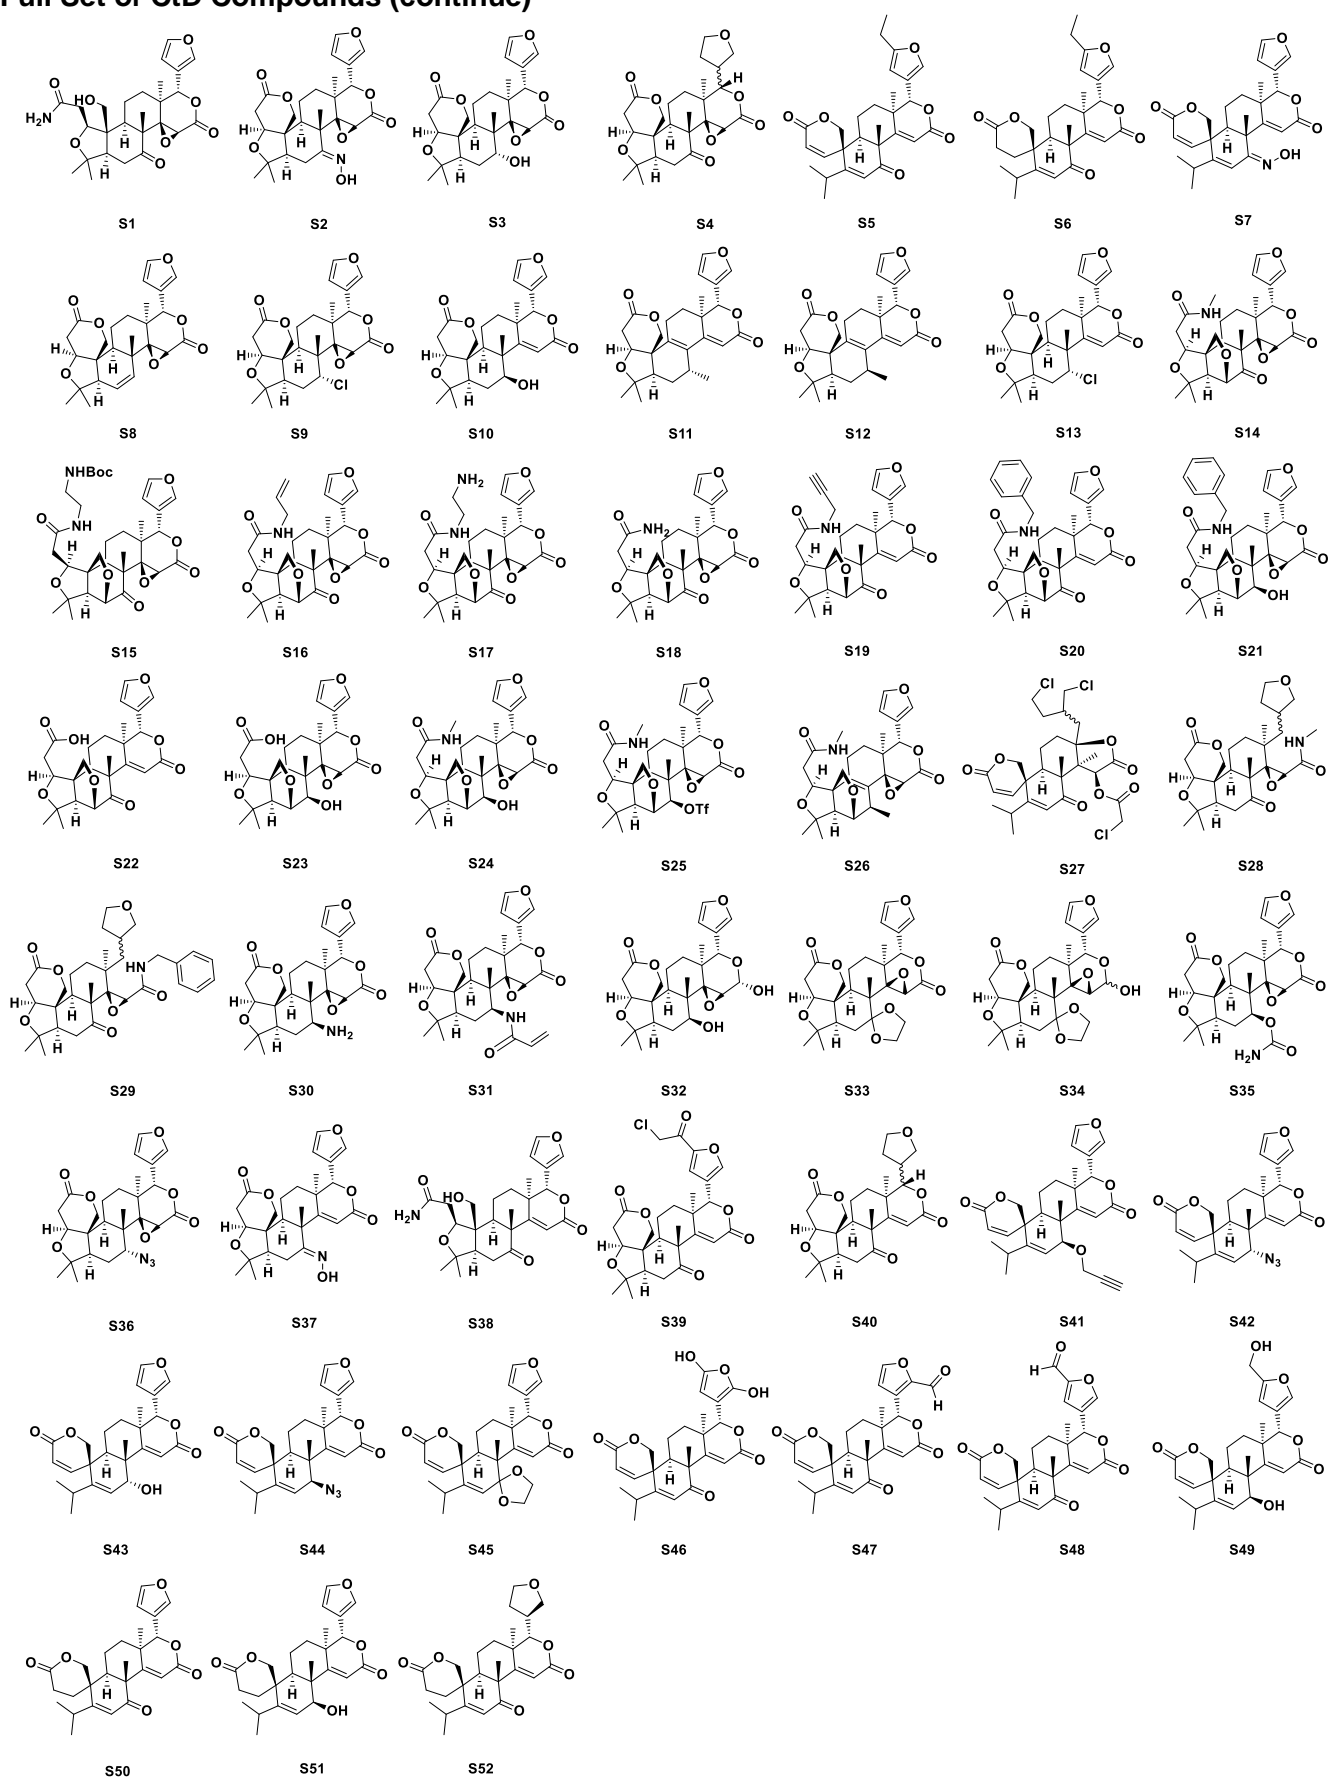

Figure S2. Compounds synthesized by ring distortion of limonene (S1-S52).

## SUPPORTING INFORMATION

Table S1. Amount of Compounds Synthesized

| Compound | Amount Obtained |
|----------|-----------------|----------|-----------------|----------|-----------------|----------|-----------------|
| 2        | >20 mg          | 33       | >20 mg          | S16      | >20 mg          | S47      | >20 mg          |
| 3        | >20 mg          | 34       | >20 mg          | S17      | >20 mg          | S48      | >20 mg          |
| 4        | >20 mg          | 35       | 3 mg            | S18      | 20 mg           | S49      | >20 mg          |
| 5        | >20 mg          | 36       | >20 mg          | S19      | 20 mg           | S50      | >20 mg          |
| 6        | >20 mg          | 37       | >20 mg          | S20      | >20 mg          | S51      | >20 mg          |
| 7        | >20 mg          | 38       | >20 mg          | S21      | >20 mg          | S52      | >20 mg          |
| 8        | >20 mg          | 39       | >20 mg          | S22      | >20 mg          | S53      | 14 mg           |
| 9        | >20 mg          | 40       | >20 mg          | S23      | >20 mg          | S54      | >20 mg          |
| 10       | >20 mg          | 41       | >20 mg          | S24      | >20 mg          | S55      | >20 mg          |
| 11       | >20 mg          | 42       | >20 mg          | S25      | >20 mg          | S56      | >20 mg          |
| 12       | 3 mg            | 43       | >20 mg          | S26      | >20 mg          | S57      | 2 mg            |
| 13       | >20 mg          | 44       | >20 mg          | S27      | >20 mg          | S58      | >20 mg          |
| 14       | >20 mg          | 45       | >20 mg          | S28      | >20 mg          | S59      | 3 mg            |
| 15       | >20 mg          | 46       | >20 mg          | S29      | >20 mg          | S60      | >20 mg          |
| 16       | 8 mg            | 47       | >20 mg          | S30      | 20 mg           | S61      | >20 mg          |
| 17       | >20 mg          | 48       | >20 mg          | S31      | >20 mg          | S62      | >20 mg          |
| 18       | >20 mg          | S1       | >20 mg          | S32      | >20 mg          | S63      | >20 mg          |
| 19       | >20 mg          | S2       | >20 mg          | S33      | >20 mg          | S64      | >20 mg          |
| 20       | >20 mg          | S3       | >20 mg          | S34      | >20 mg          | S65      | >20 mg          |
| 21       | >20 mg          | S4       | >20 mg          | S35      | >20 mg          | S66      | 20 mg           |
| 22       | 6 mg            | S5       | >20 mg          | S36      | >20 mg          | S67      | >20 mg          |
| 23       | >20 mg          | S6       | 18 mg           | S37      | >20 mg          | S68      | >20 mg          |
| 24       | 2.8 mg          | S7       | >20 mg          | S38      | >20 mg          | S69      | 16 mg           |
| 25       | >20 mg          | S8       | >20 mg          | S39      | >20 mg          | S70      | >20 mg          |
| 26       | >20 mg          | S9       | >20 mg          | S40      | >20 mg          | S71      | 2 mg            |
| 27       | >20 mg          | S10      | >20 mg          | S41      | >20 mg          | S72      | >20 mg          |
| 28       | >20 mg          | S11      | >20 mg          | S42      | >20 mg          |          |                 |
| 29       | >20 mg          | S12      | 12 mg           | S43      | >20 mg          |          |                 |
| 30       | >20 mg          | S13      | >20 mg          | S44      | 6 mg            |          |                 |
| 31       | >20 mg          | S14      | >20 mg          | S45      | 8 mg            |          |                 |
| 32       | >20 mg          | S15      | >20 mg          | S46      | >20 mg          |          |                 |

## SUPPORTING INFORMATION

## Comparison of Complexity Metrics of Limonin Set with Various Small Molecule Compound Libraries

## ➤ Antibacterial Drugs (O'Shea and Moser Antibacterial)

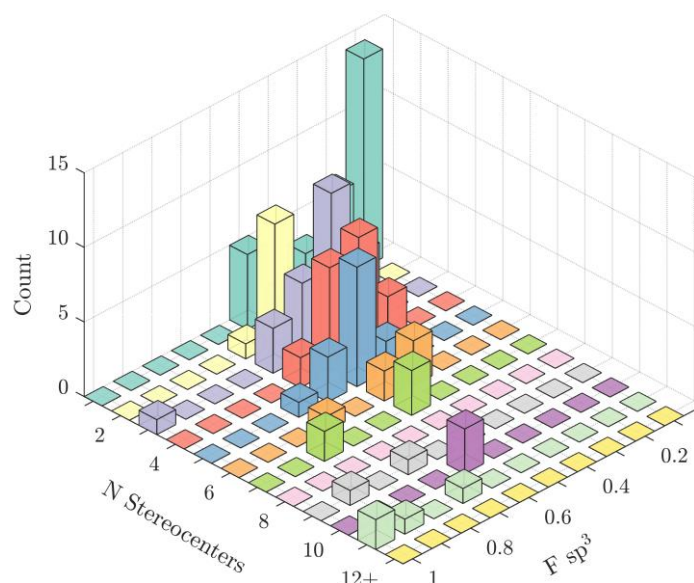Figure S3. Complexity metrics ( $F_{sp^3}$  and chiral centers) of Antibacterial Drugs.

## ➤ Anticancer Drugs (AOD8)

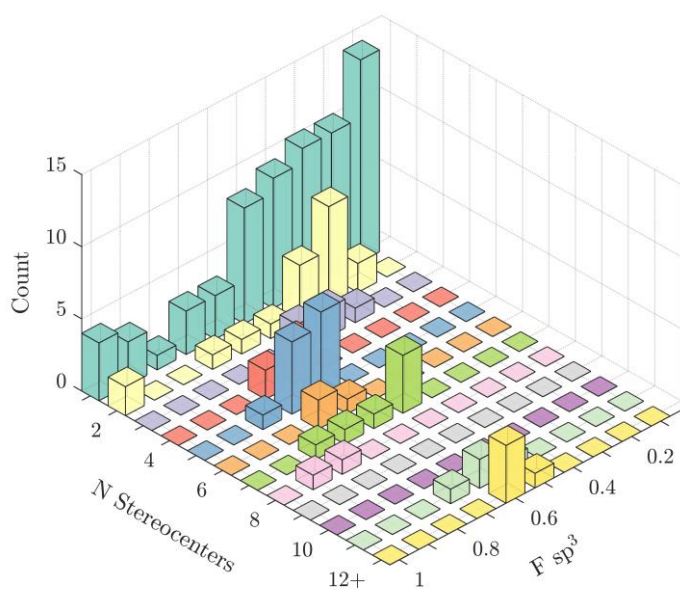Figure S4. Complexity metrics ( $F_{sp^3}$  and chiral centers) of Anticancer Drugs.

➤ **Chembridge CL**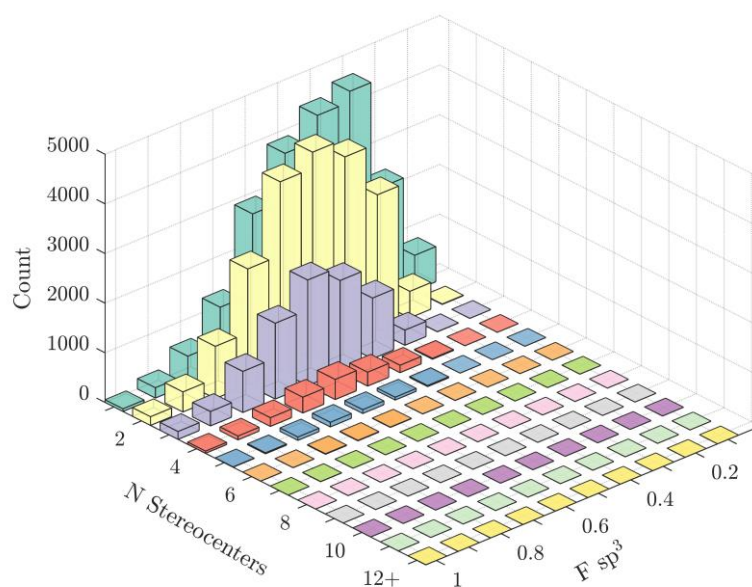**Figure S5.** Complexity metrics (F<sub>sp<sup>3</sup></sub> and chiral centers) of Chembridge CL.➤ **Chembridge EXP**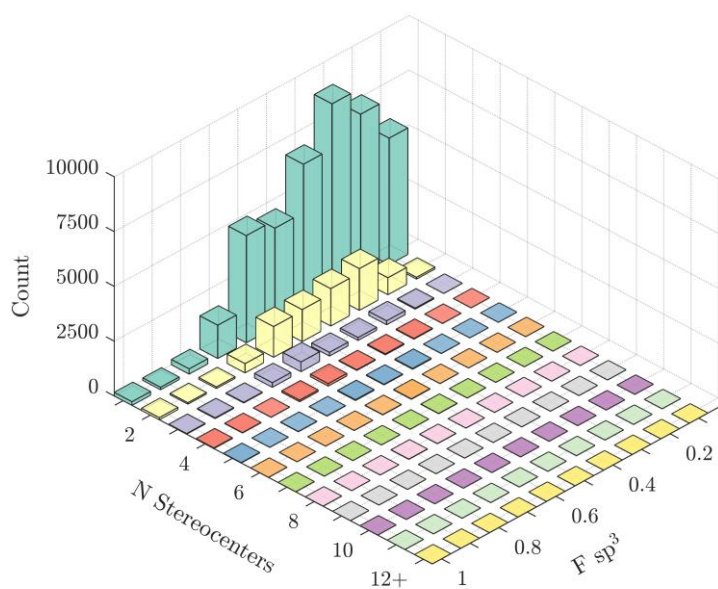**Figure S6.** Complexity metrics (F<sub>sp<sup>3</sup></sub> and chiral centers) of Chembridge EXP.

## SUPPORTING INFORMATION

➤ **Chembridge Microformat**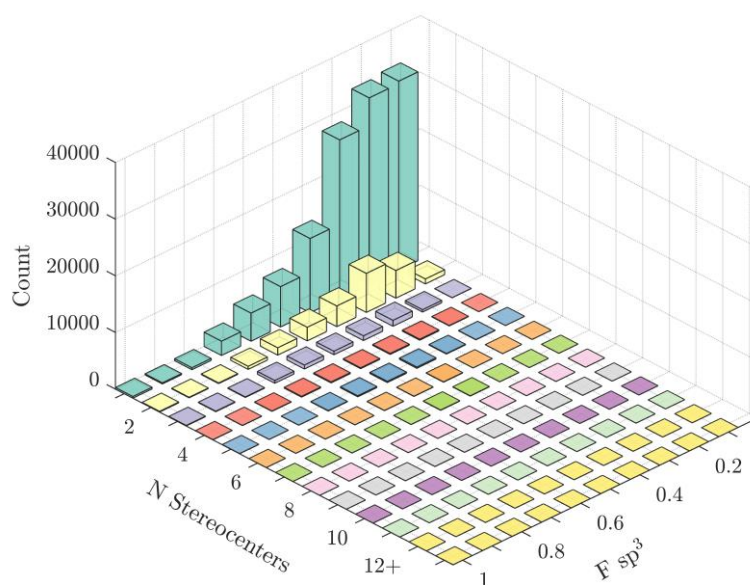

**Figure S7.** Complexity metrics (Fsp<sup>3</sup> and chiral centers) of Chembridge Microformat.

➤ **Drugbank**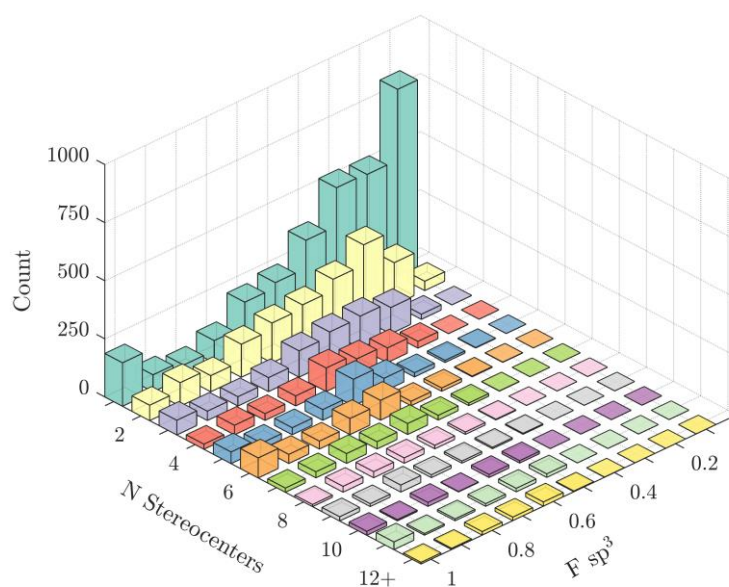

**Figure S8.** Complexity metrics (Fsp<sup>3</sup> and chiral centers) of Approved drugs (Drugbank library).

## SUPPORTING INFORMATION

## ➤ NPASS (Natural Products)

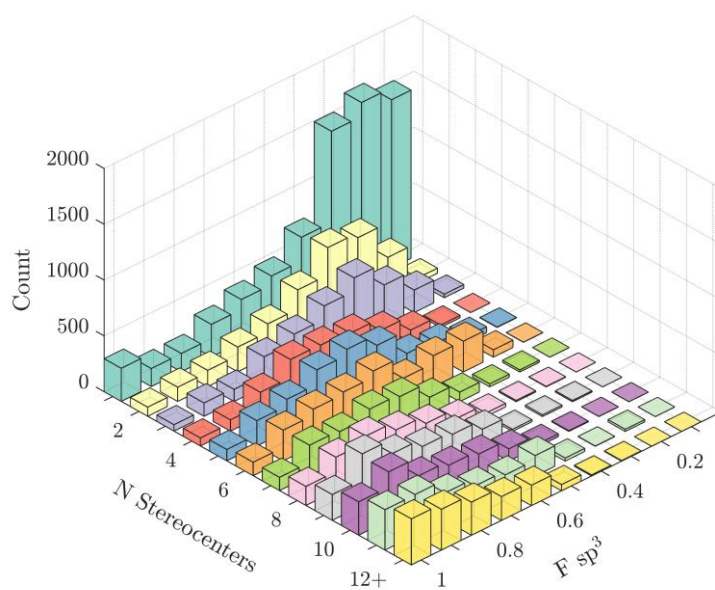

Figure S9. Complexity metrics ( $F_{sp^3}$  and chiral centers) of Natural Products NPASS.

## MLSMR (Natural Products)

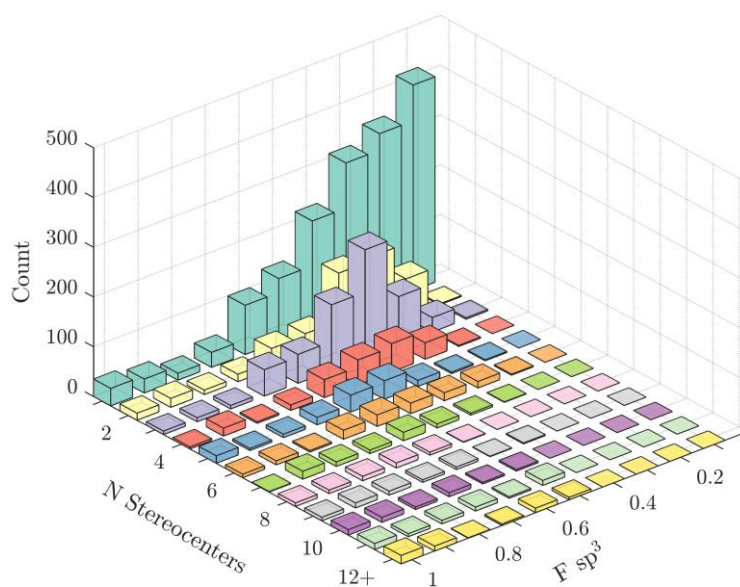

Figure S10. Complexity metrics ( $F_{sp^3}$  and chiral centers) of Natural Products MLSMR.

## ➤ CtD Libraries

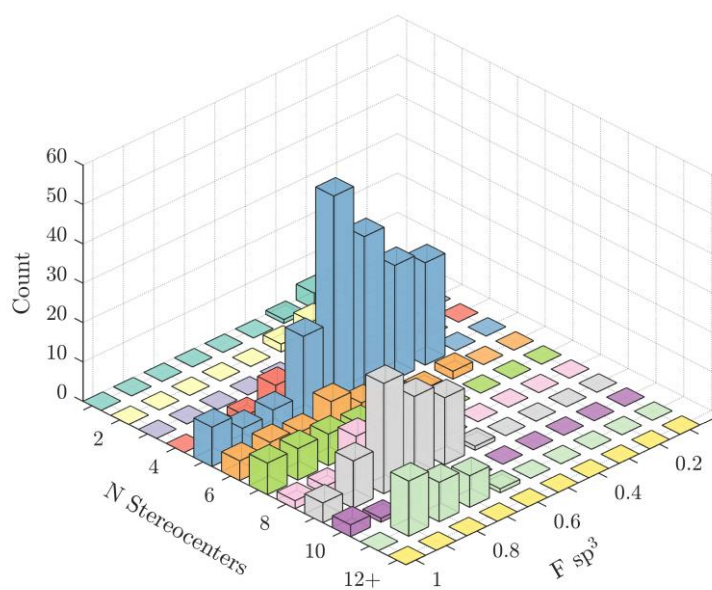

Figure S11. Complexity metrics (F<sub>sp<sup>3</sup></sub> and chiral centers) of Full CtD library.

## ➤ Limonin CtD Library

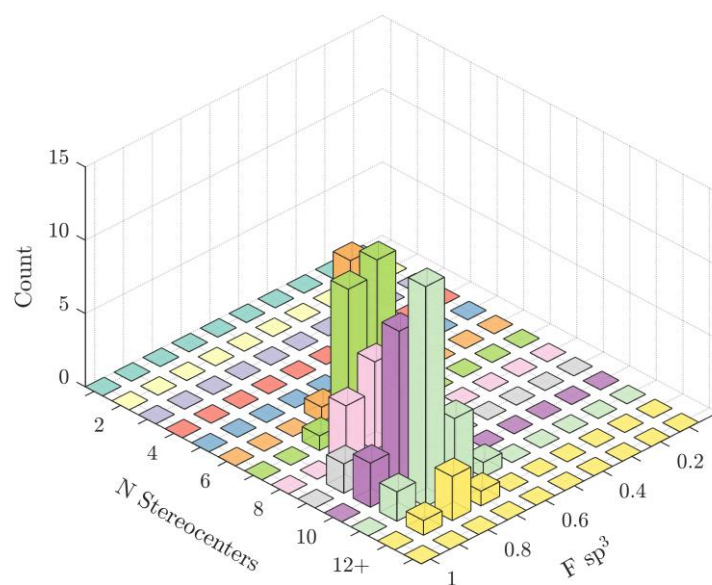

Figure S12. Complexity metrics (F<sub>sp<sup>3</sup></sub> and chiral centers) of Limonin Library.

## SUPPORTING INFORMATION

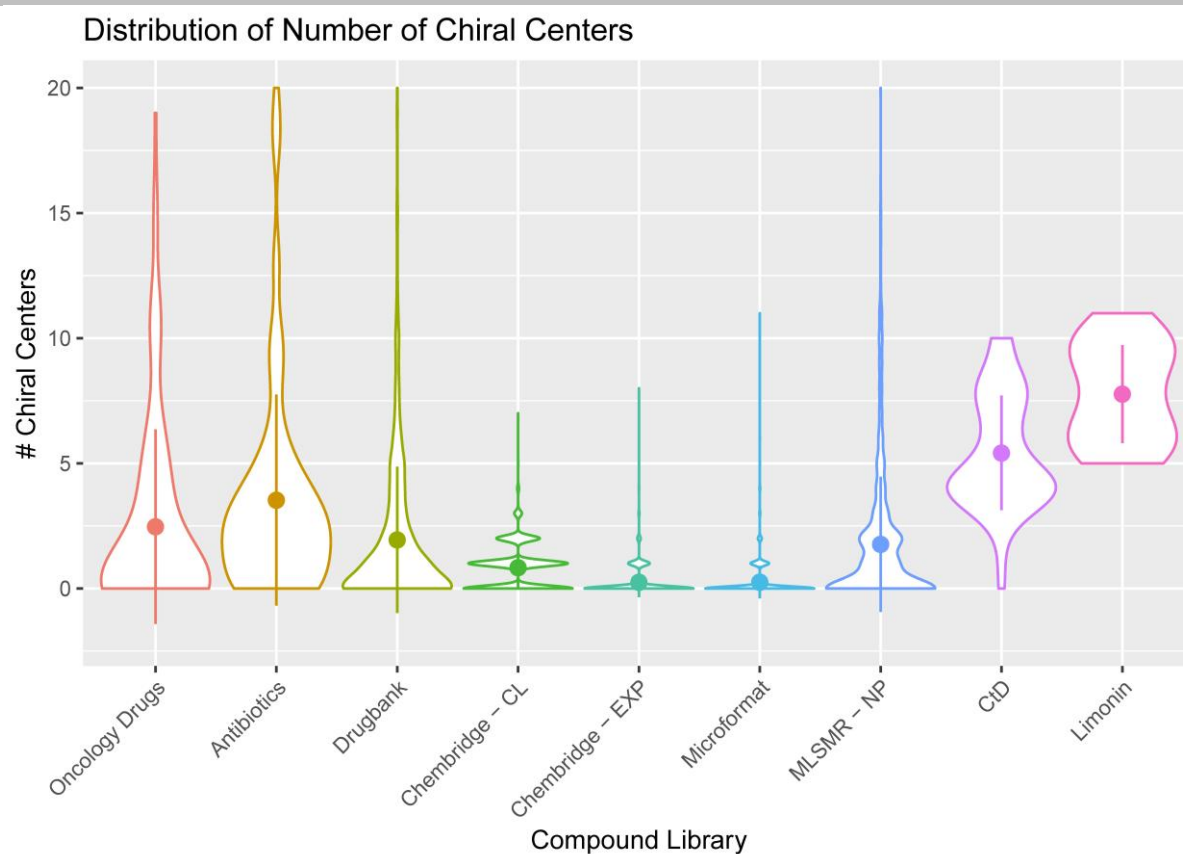

**Figure S13.** Distribution of Number of Chiral Centers of Limonin CtD library: comparison of number of chiral centers of limonin set with various small molecule compound libraries.

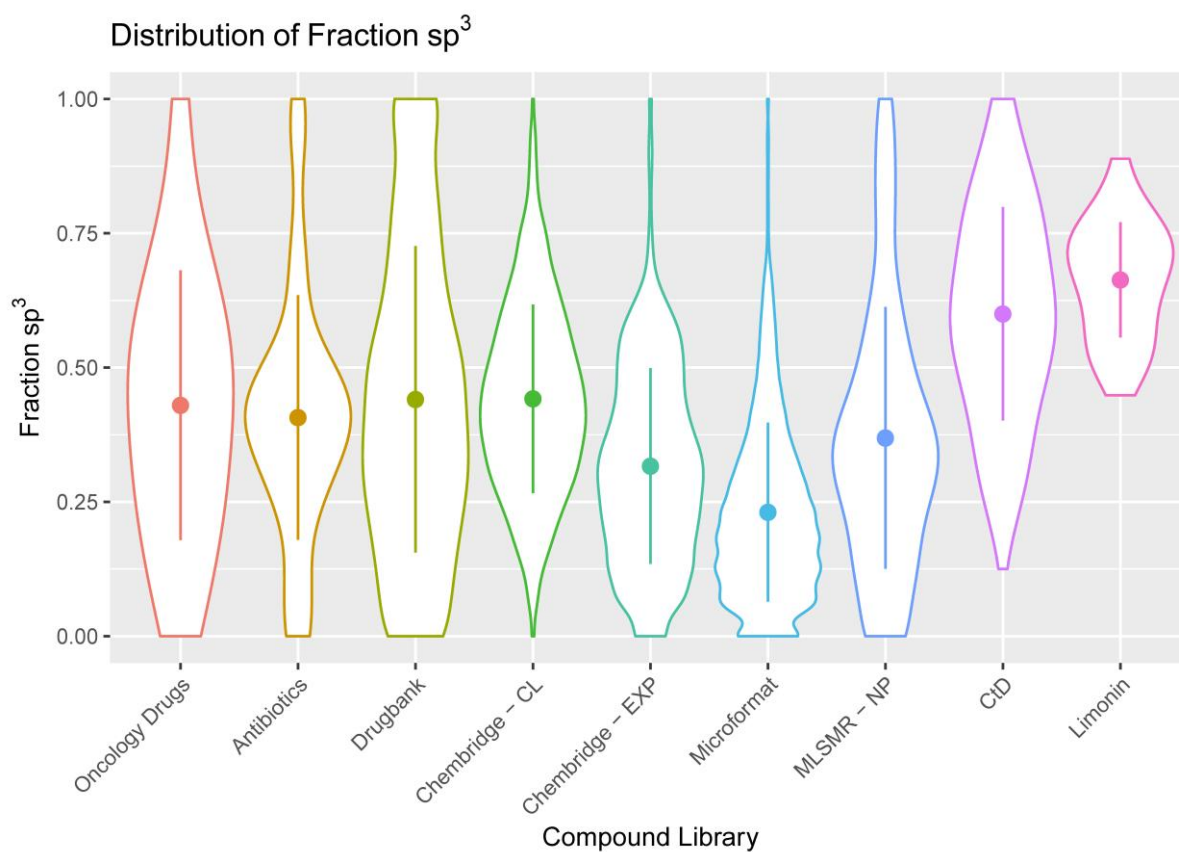

**Figure S14.** Distribution of Fraction  $sp^3$  of Limonin CtD library: comparison of fraction  $sp^3$  of limonin set with various small molecule compound libraries.



## SUPPORTING INFORMATION

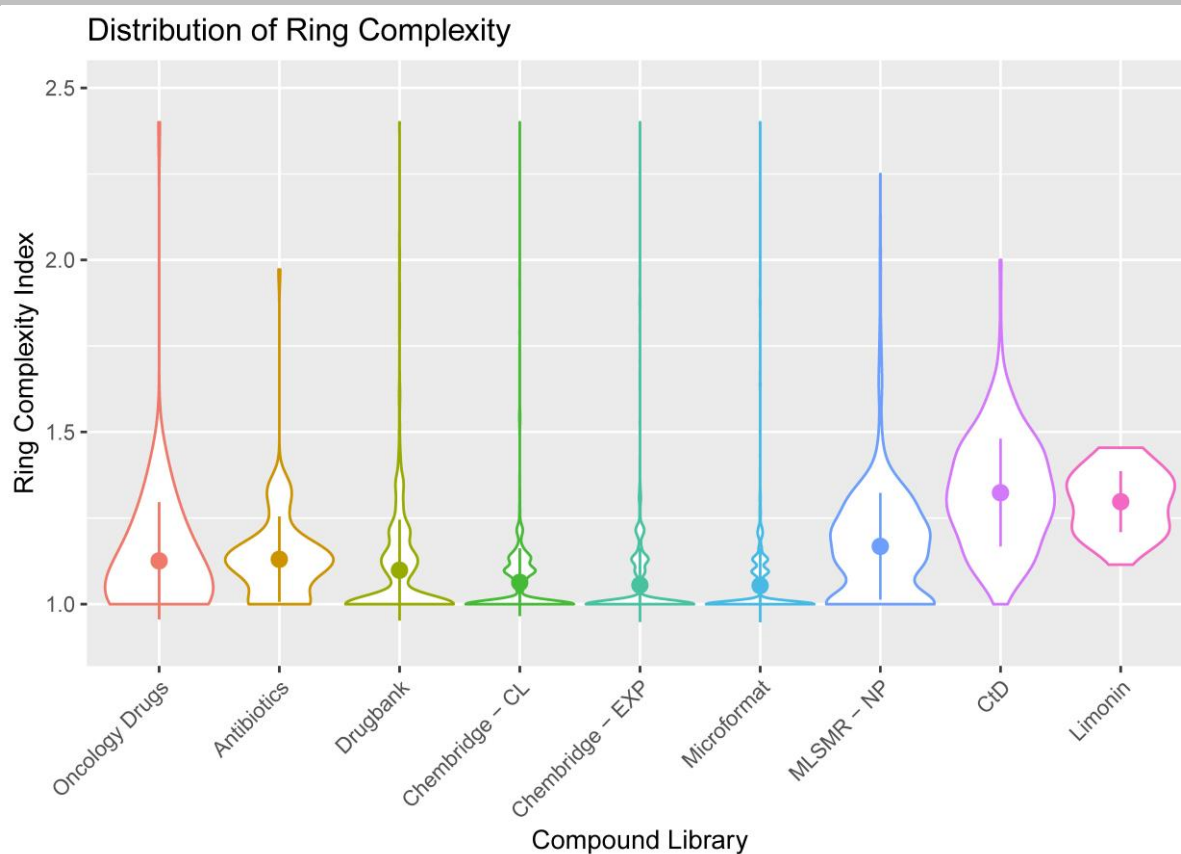

Figure S15. Distribution of Ring Complexity of Limonin CtD library: comparison of Ring Complexity of limonin set with various small molecule compound libraries.

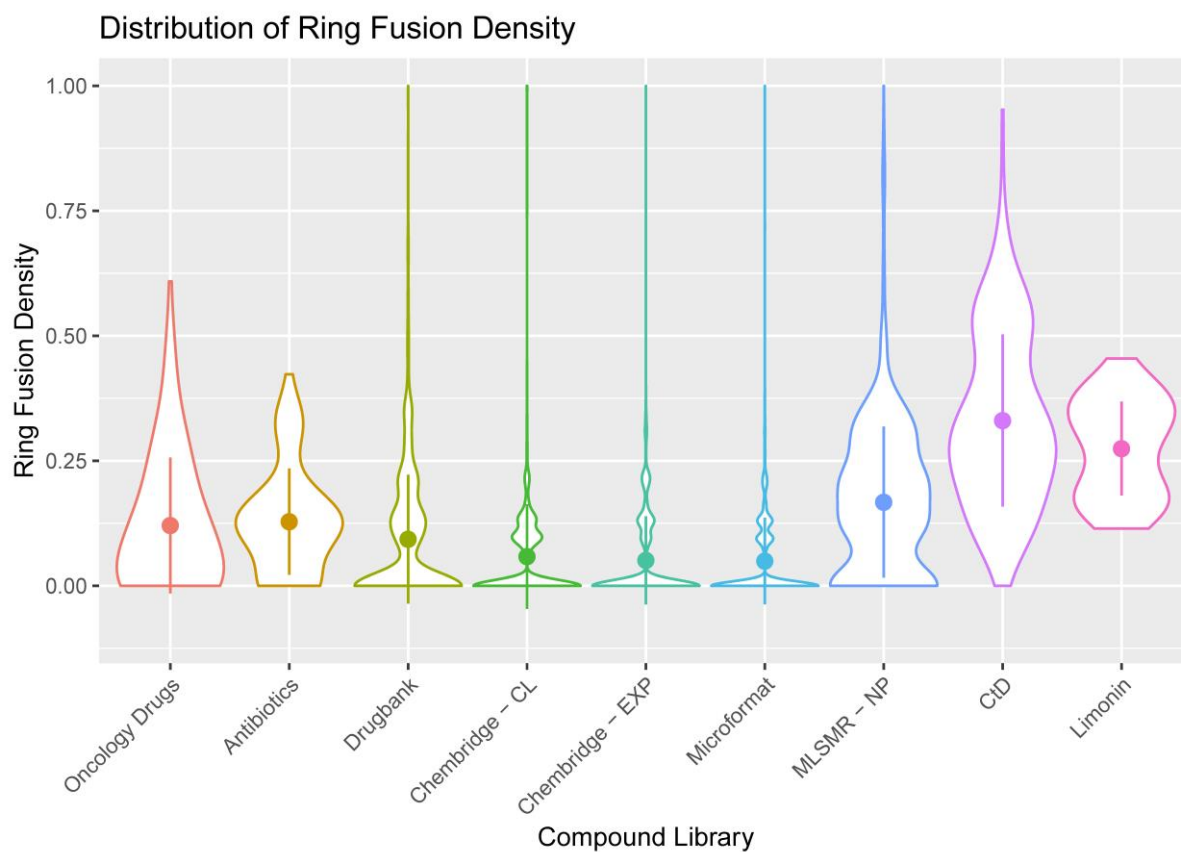

Figure S16. Distribution of Ring Fusion Density of Limonin CtD library: comparison of Ring Fusion Density of limonin set with various small molecule compound libraries.

## SUPPORTING INFORMATION

## Comparison of Diversity Metrics of Limonin Set with Various Small Molecule Compound Libraries

**Table S2.** Murcko scaffolds analysis: results of the scaffold diversity analysis of Limonin library

| Compound collection | M <sup>[a]</sup> | N <sup>[b]</sup> | N/M  | N <sub>sing</sub> <sup>[c]</sup> | N <sub>sing</sub> /N | N <sub>sing</sub> /M |
|---------------------|------------------|------------------|------|----------------------------------|----------------------|----------------------|
| Oncology Drugs      | 124              | 98               | 0.79 | 82                               | 0.84                 | 0.36                 |
| Antibiotics         | 128              | 91               | 0.71 | 72                               | 0.79                 | 0.56                 |
| Drugbank            | 9377             | 5266             | 0.56 | 4286                             | 0.70                 | 0.36                 |
| Chembridge-CL       | 50000            | 41954            | 0.84 | 38459                            | 0.91                 | 0.77                 |
| Chembridge-EXP      | 49994            | 12272            | 0.24 | 7861                             | 0.64                 | 0.15                 |
| Microformat         | 149799           | 29295            | 0.19 | 17786                            | 0.60                 | 0.12                 |
| MLSMR               | 3357             | 1098             | 0.32 | 617                              | 0.56                 | 0.18                 |
| NPASS               | 2380             | 1213             | 0.51 | 853                              | 0.70                 | 0.36                 |
| Lycorine CtD        | 54               | 36               | 0.66 | 27                               | 0.75                 | 0.50                 |
| Pleuromutilin CtD   | 53               | 26               | 0.49 | 19                               | 0.73                 | 0.35                 |
| Limonin CtD         | 99               | 52               | 0.53 | 36                               | 0.69                 | 0.37                 |

<sup>[a]</sup> M = number of compounds, <sup>[b]</sup> N = number of Murcko frameworks, <sup>[c]</sup> N<sub>sing</sub> = number of singleton scaffolds (scaffold that are present in only one exemplar molecule).

## SUPPORTING INFORMATION

➤ **Antibacterial Drugs (O'Shea and Moser Antibacterial)**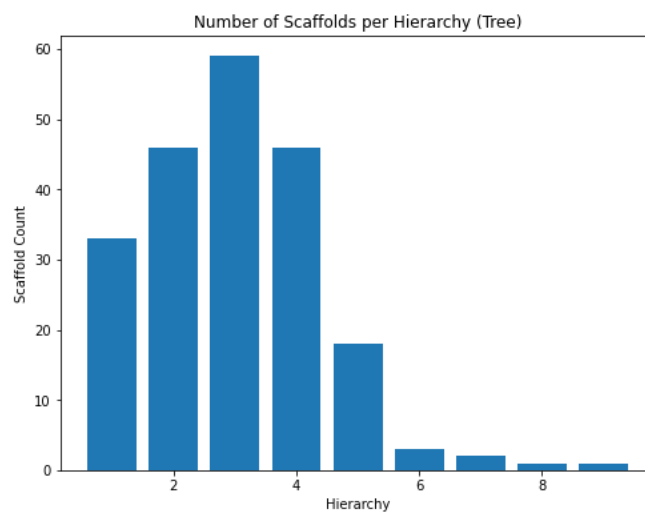**Figure S17.** Scaffold tree of antibacterial drugs.➤ **Anticancer Drugs (OAD8)**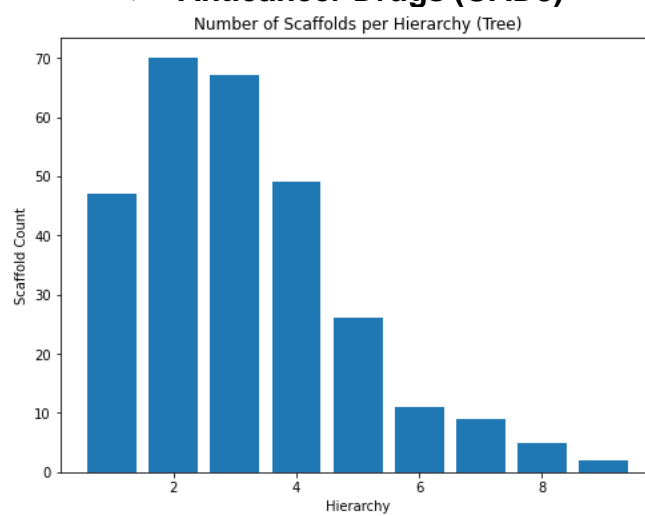**Figure S18.** Scaffold tree of anticancer drugs.

## SUPPORTING INFORMATION

➤ **Chembridge CL**

Number of Scaffolds per Hierarchy (Tree)

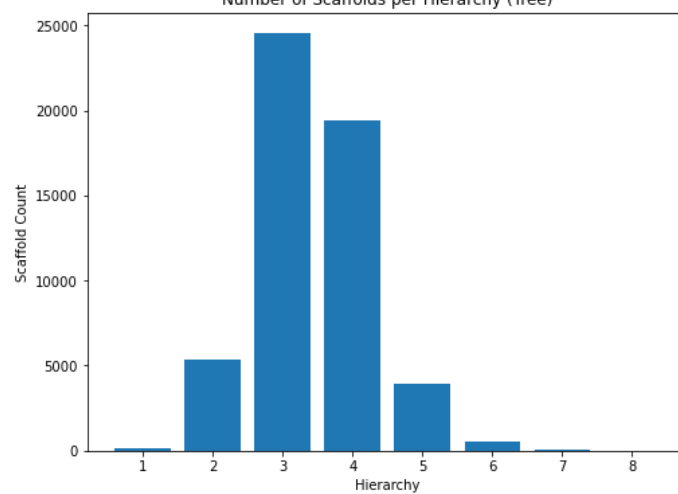**Figure S19.** Scaffold tree of Chembridge CL.➤ **Chembridge EXP**

Number of Scaffolds per Hierarchy (Tree)

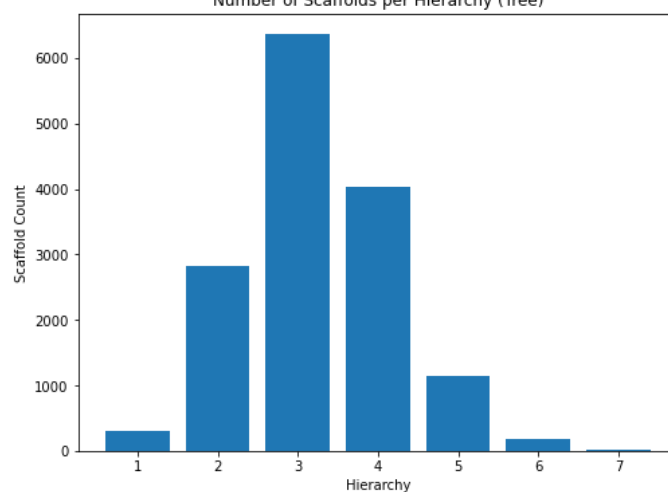**Figure S20.** Scaffold tree of Chembridge EXP.

## SUPPORTING INFORMATION

➤ **Chembridge Microformat**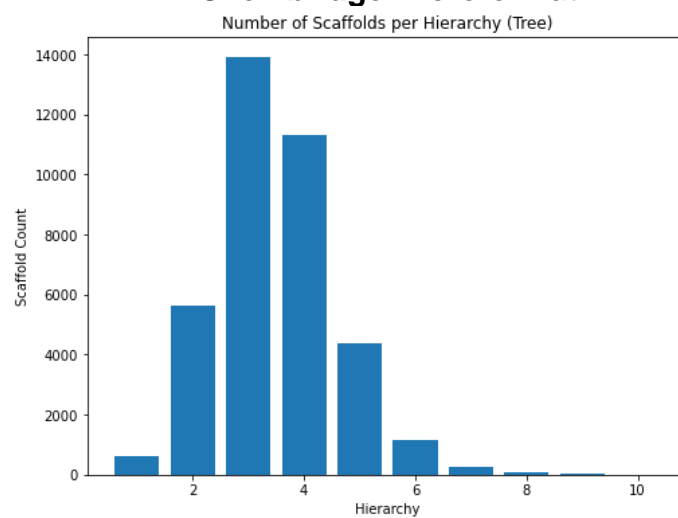**Figure S21.** Scaffold tree of Chembridge Microformat.➤ **Drugbank**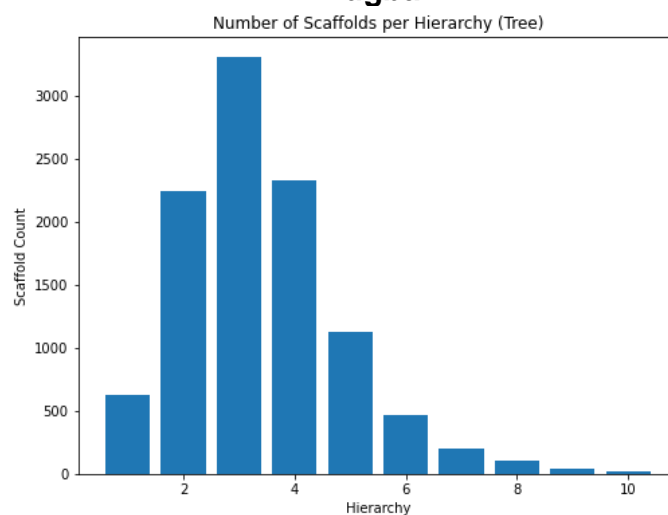**Figure S22.** Scaffold tree of approved drugs (Drugbank).

## SUPPORTING INFORMATION

➤ **NPASS (Natural Products)**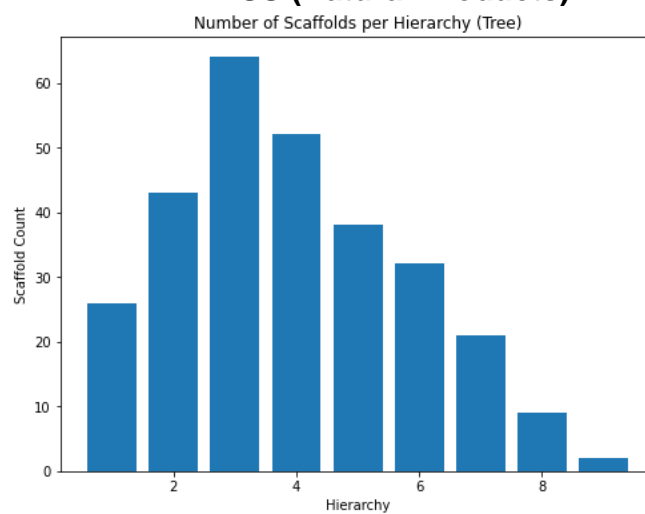**Figure S23.** Scaffold tree of natural products NPASS.➤ **MLSMR (Natural Products)**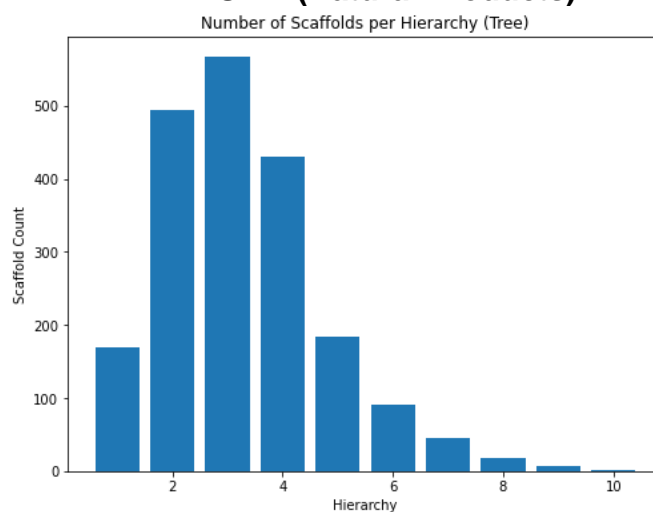**Figure S24.** Scaffold tree of natural products MLSMR.

## SUPPORTING INFORMATION

➤ **Limonin CtD**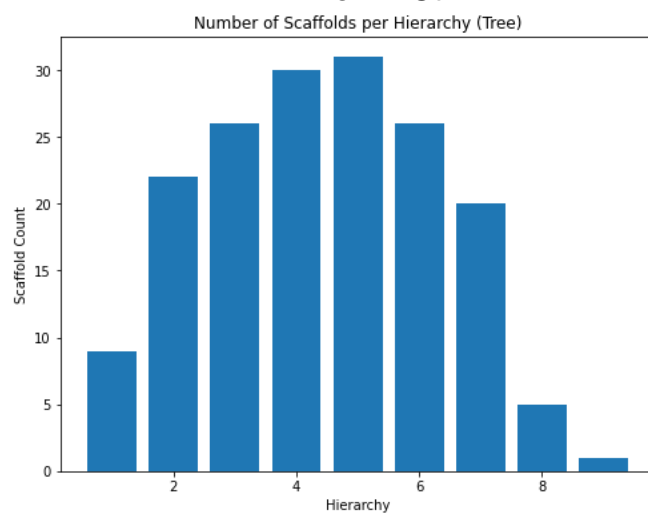**Figure S25.** Scaffold tree of limonin CtD library.➤ **Pleuromutilin CtD**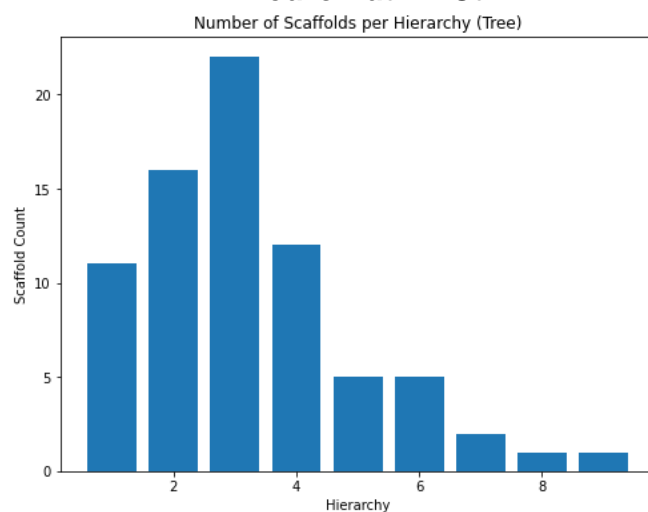**Figure S26.** Scaffold tree of pleuromutilin CtD library.

## SUPPORTING INFORMATION

## ➤ Lycorine CtD

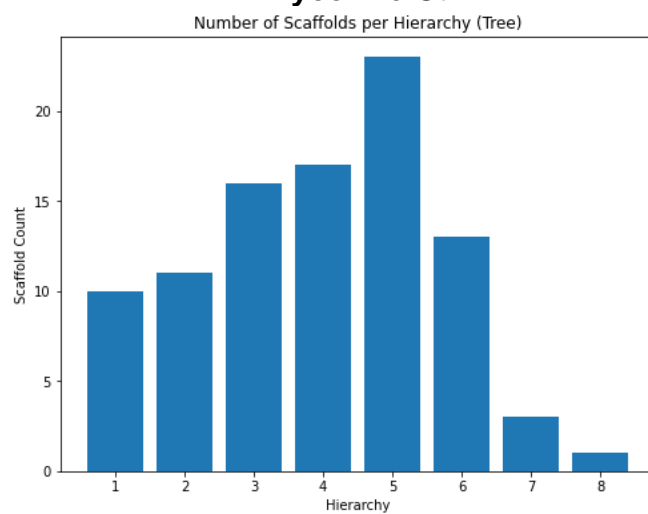

Figure S27. Scaffold tree of lycorine CtD library.

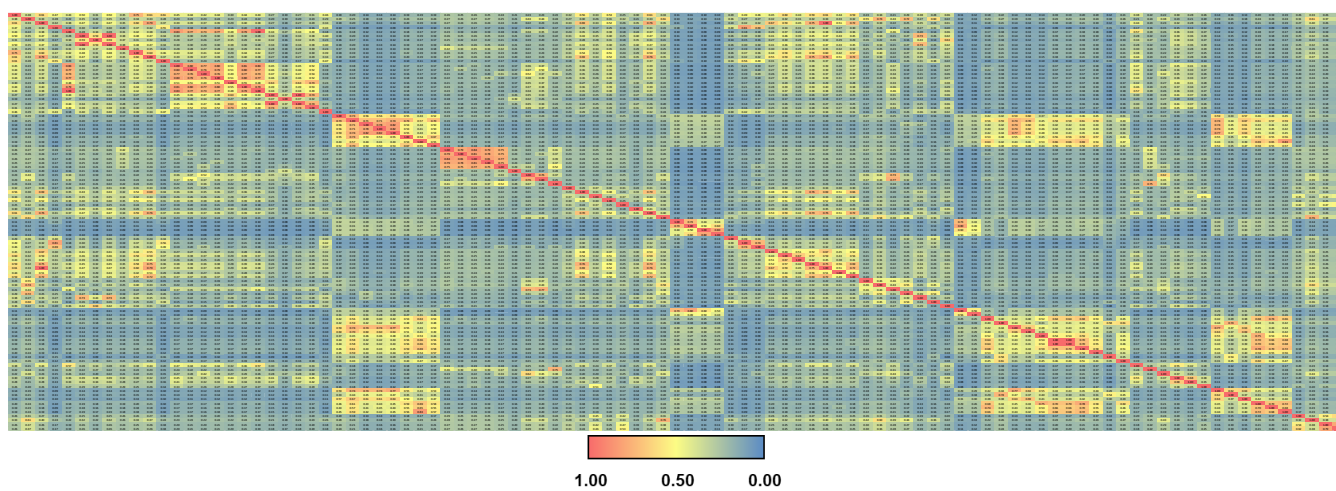

Figure S28. Tanimoto Similarity Matrix for the 99-compound set and limonin: The Tanimoto coefficient was calculated using Canvas (Schrödinger) using ECFP radial molecular fingerprint.



## SUPPORTING INFORMATION

## Cell Culture Studies

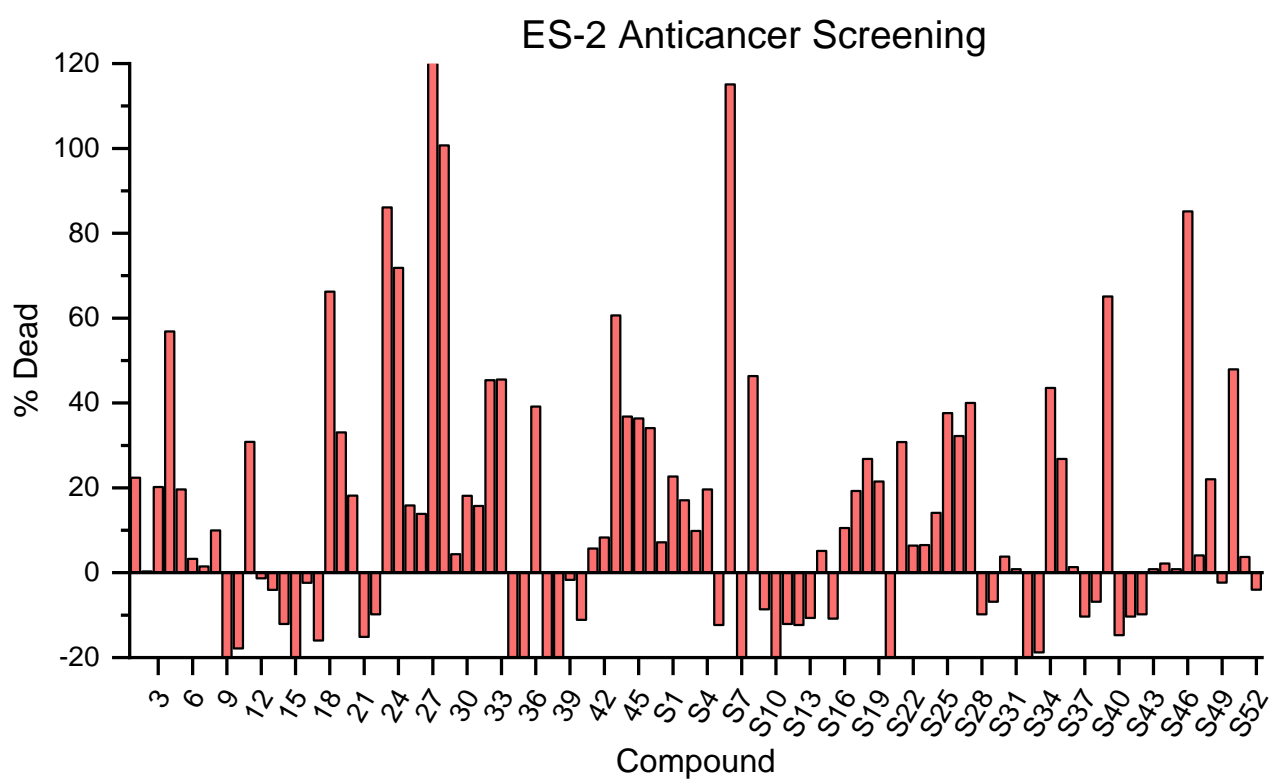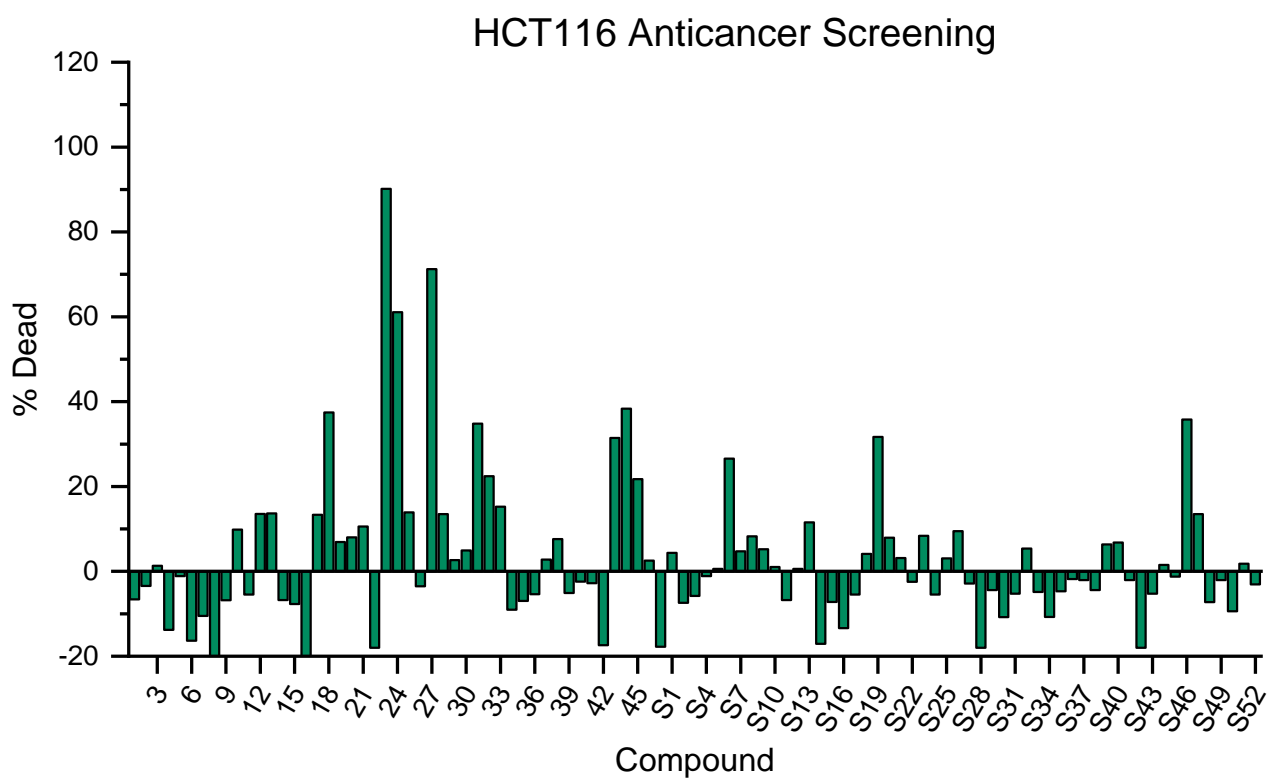

**Figure S29.** Anticancer screening results. Primary biological screening of limonin CtD library against ES-2 and HCT116 cancer cells. Compounds were tested at 20  $\mu$ M. Cell viability was measured using Alamar Blue after 72 h.

## SUPPORTING INFORMATION

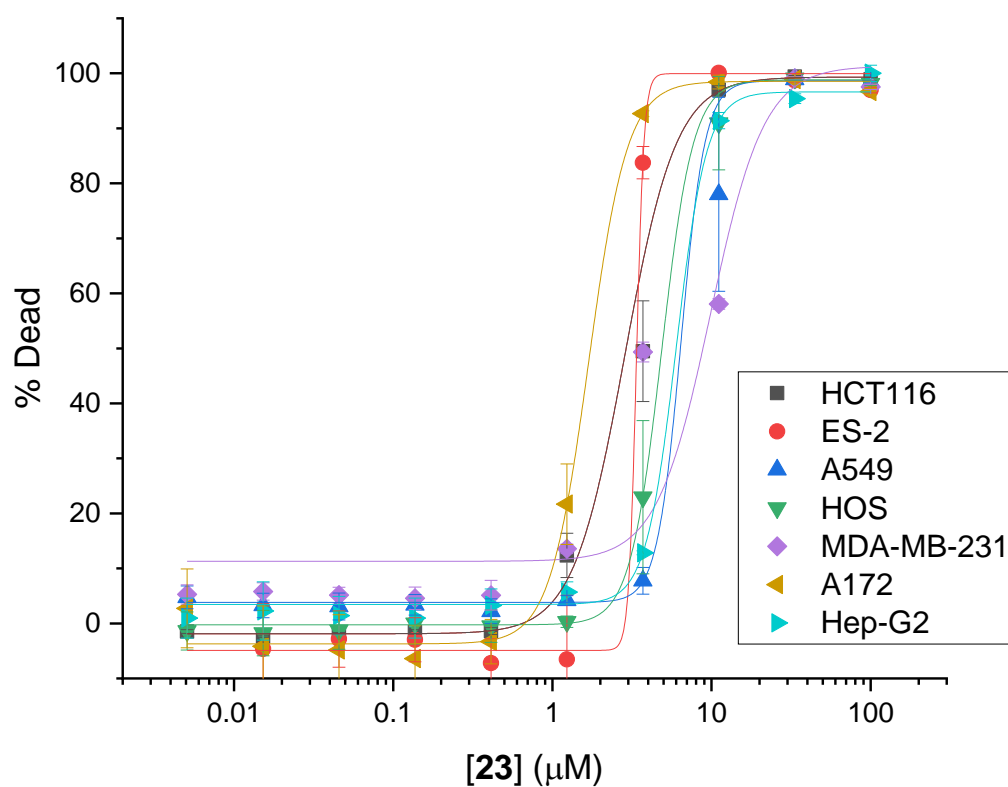

**Figure S30.** Dose-response curves for **23** against a panel of cancer cells. Bioactivity is expressed as a 72-hour IC<sub>50</sub> value (in  $\mu\text{M}$ ) against a panel of cell lines, as measured by Alamar Blue assay. Data represent mean  $\pm$  SEM., Raptinal (50  $\mu\text{M}$ ) was used as dead control,  $n = 3$  biological replicates.

## SUPPORTING INFORMATION

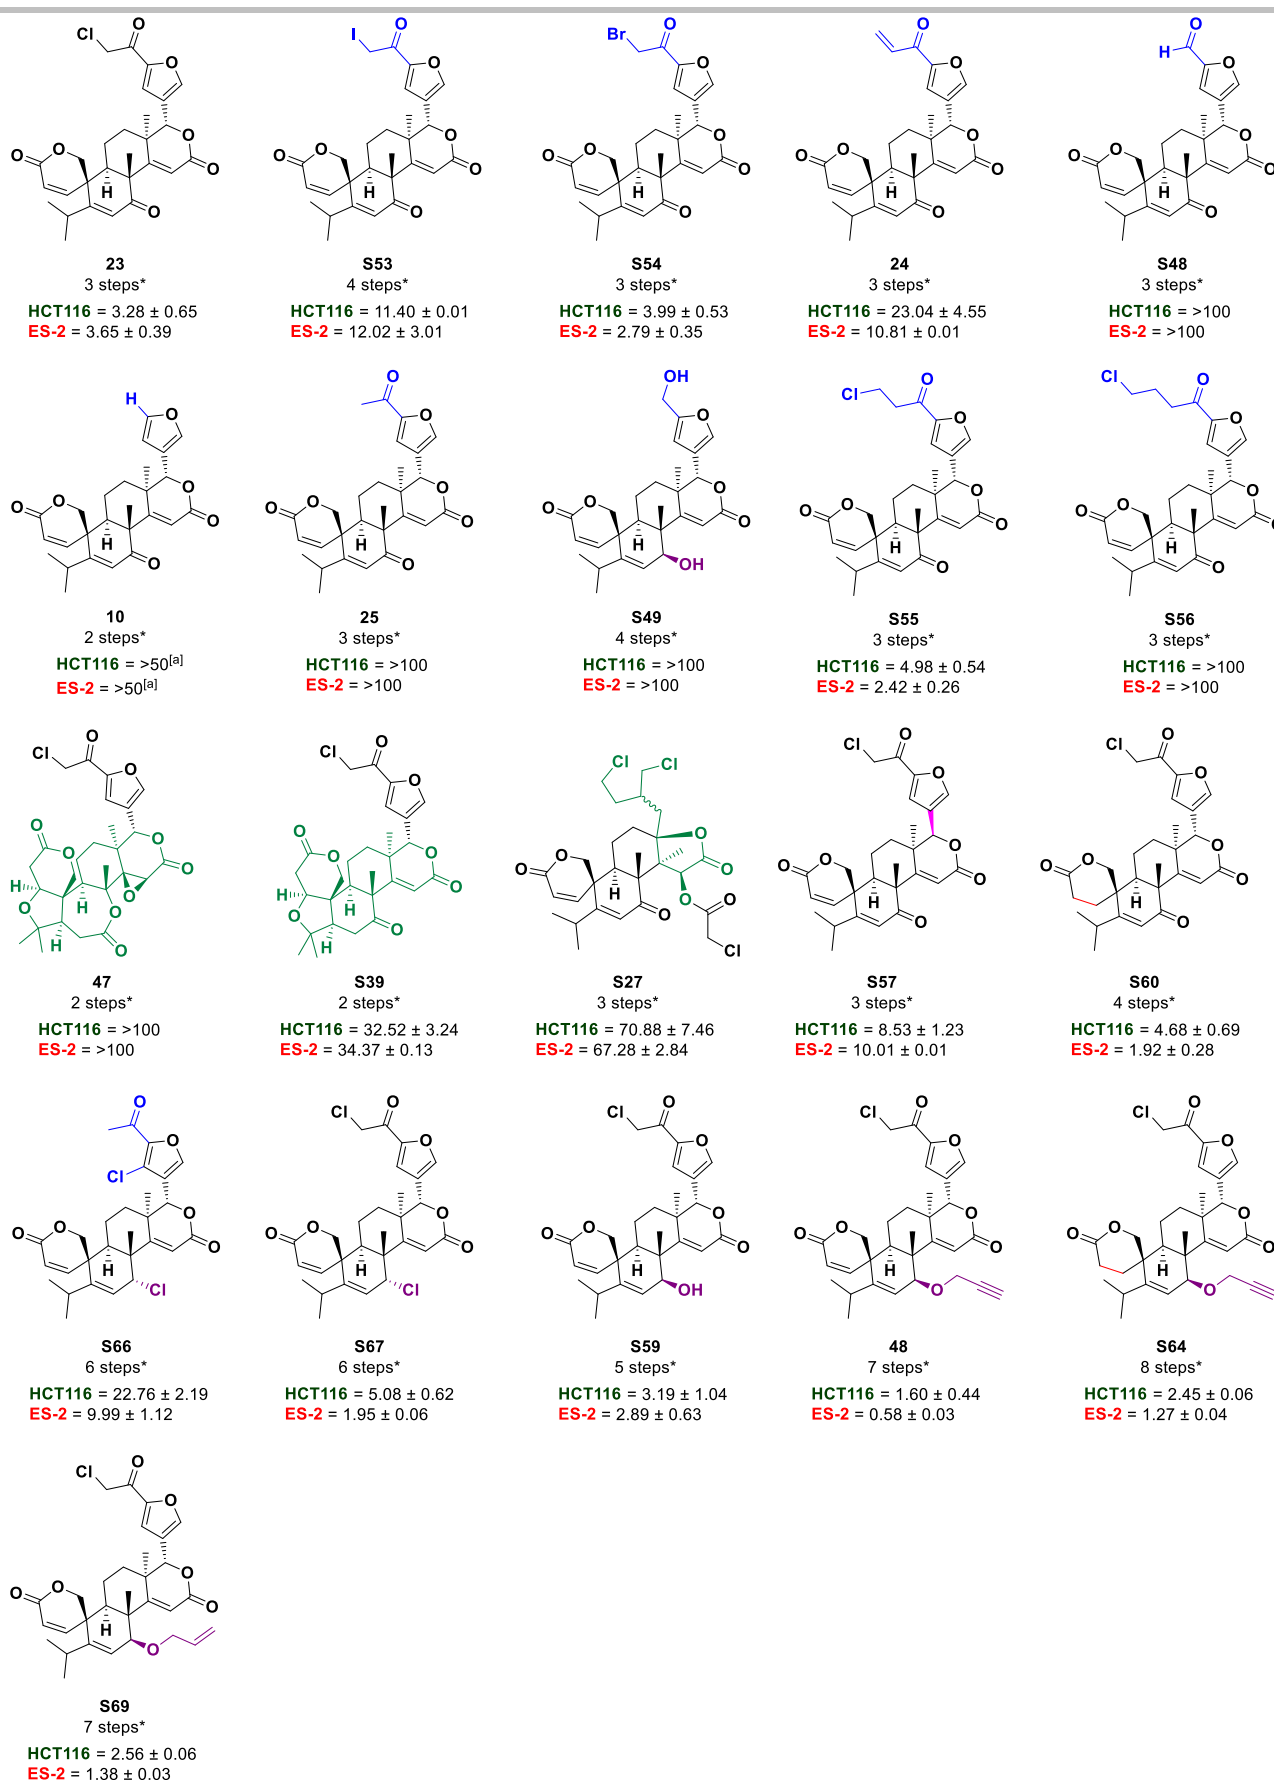

**Figure S31.** Structure-activity relationship of **23** analogs. Bioactivity is expressed as a 72-hour  $IC_{50}$  value (in  $\mu M$ ) against the HCT116 and ES-2 cell lines (3000 c/w), as measured by Alamar Blue assay. Data represent mean  $\pm$  SEM. Raptinal (50  $\mu M$ ) was used as dead control,  $n = 3$  biological replicates. \*number of steps from limonin, <sup>[a]</sup> not soluble at 100  $\mu M$ .

## SUPPORTING INFORMATION

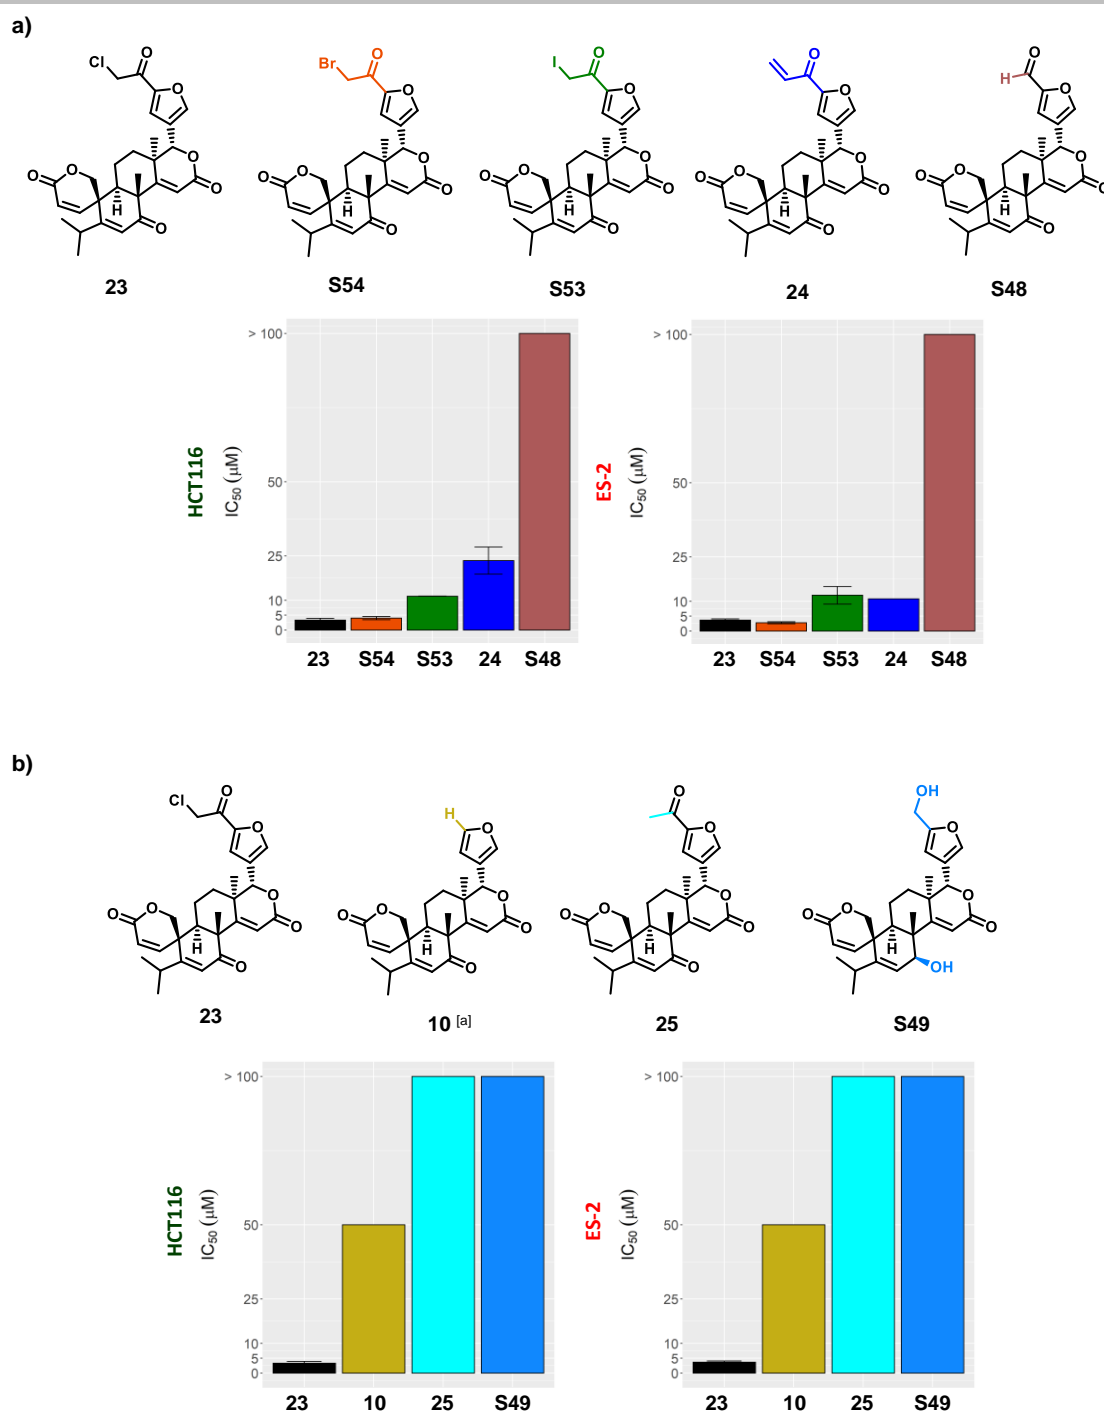

**Figure S32.** Structure-activity relationship of **23** analogs: effect of the warhead on anticancer activity. a) Electrophile modification; b) Electrophile removal. Bioactivity is expressed as a 72-hour  $IC_{50}$  value (in  $\mu M$ ) against the HCT116 and ES-2 cell lines (3000 c/w), as measured by Alamar Blue assay. Data represent mean  $\pm$  SEM. Raptinal (50  $\mu M$ ) was used as dead control,  $n = 3$  biological replicates.<sup>[a]</sup> not soluble at 100  $\mu M$ .

## SUPPORTING INFORMATION

a)

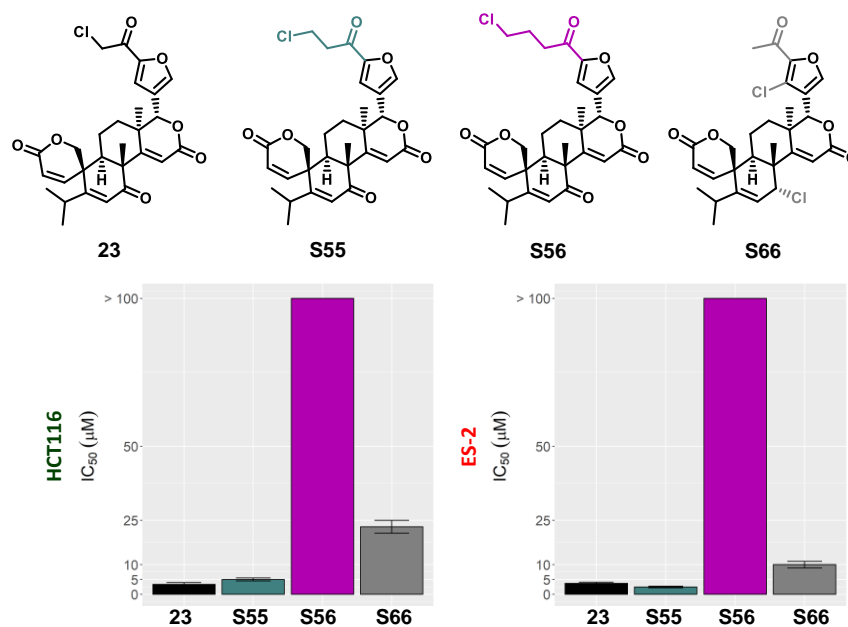

b)

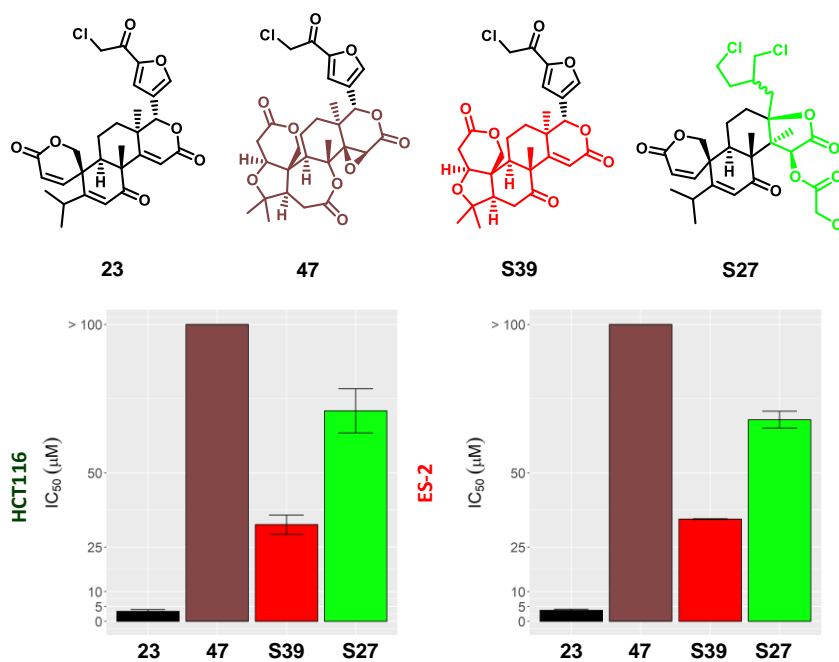

**Figure S33.** Structure-activity relationship of **23** analogs: effect of warhead and scaffold on anticancer activity. a) Chlorine position modification; b) scaffold replacement. Bioactivity is expressed as a 72-hour  $IC_{50}$  value (in  $\mu$ M) against the HCT116 and ES-2 cell lines (3000 c/w), as measured by Alamar Blue assay. Data represent mean  $\pm$  SEM. Raptinal (50  $\mu$ M) was used as dead control,  $n = 3$  biological replicates.

## SUPPORTING INFORMATION

a)

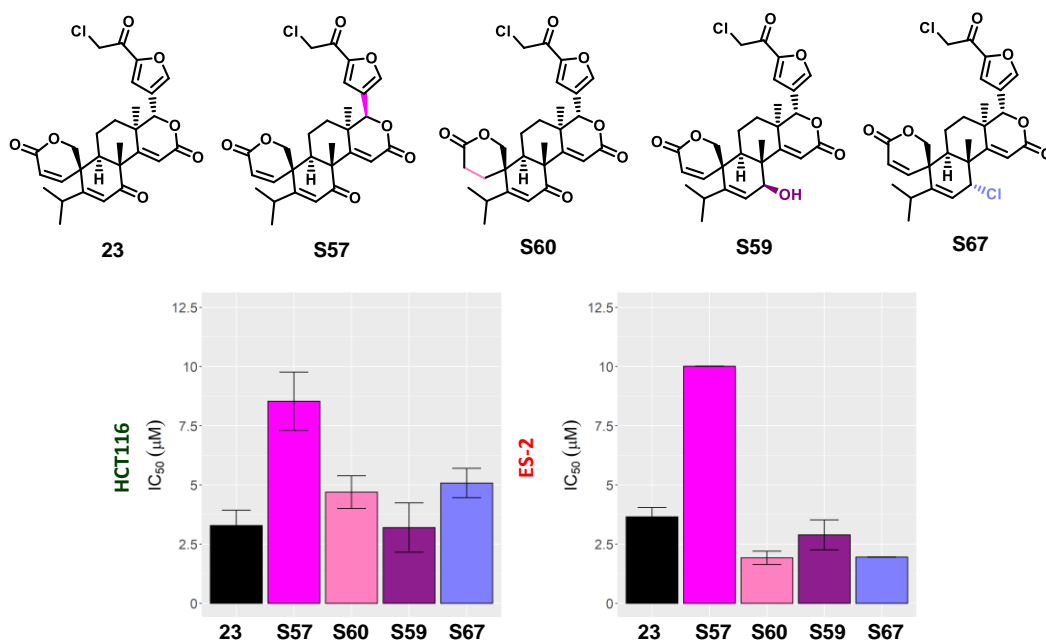

b)

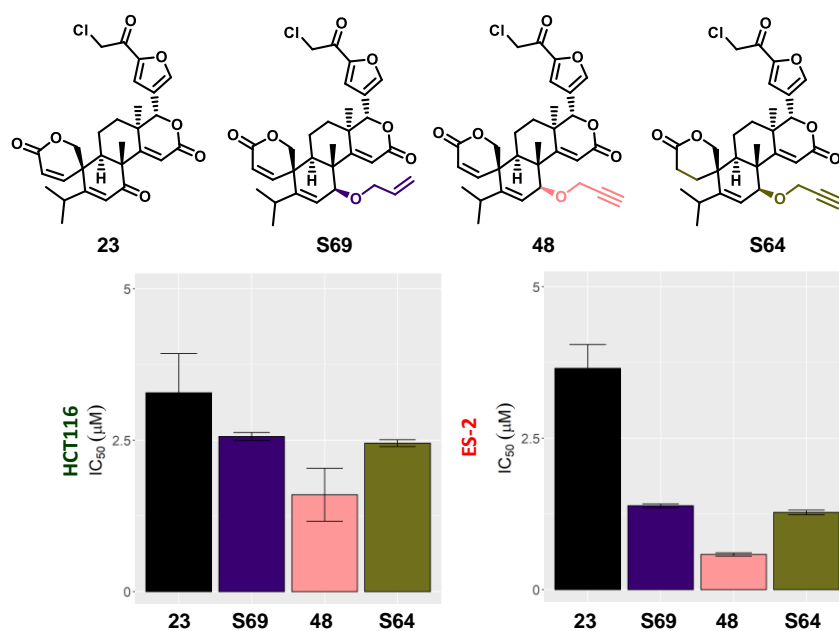

**Figure S34.** . Structure-activity relationship of 23 analogs: functional group manipulation. a) Effect of furan stereochemistry, A-ring unsaturation, and B ring ketone on the anticancer activity; b) effect of B-ring manipulation. Bioactivity is expressed as a 72-hour IC<sub>50</sub> value (in  $\mu\text{M}$ ) against the HCT116 and ES-2 cell lines (3000 c/w), as measured by Alamar Blue assay. Data represent mean  $\pm$  SEM. Raptinal (50  $\mu\text{M}$ ) was used as dead control,  $n = 3$  biological replicates.

## SUPPORTING INFORMATION

## Full Set SAR derivatives and Intermediates

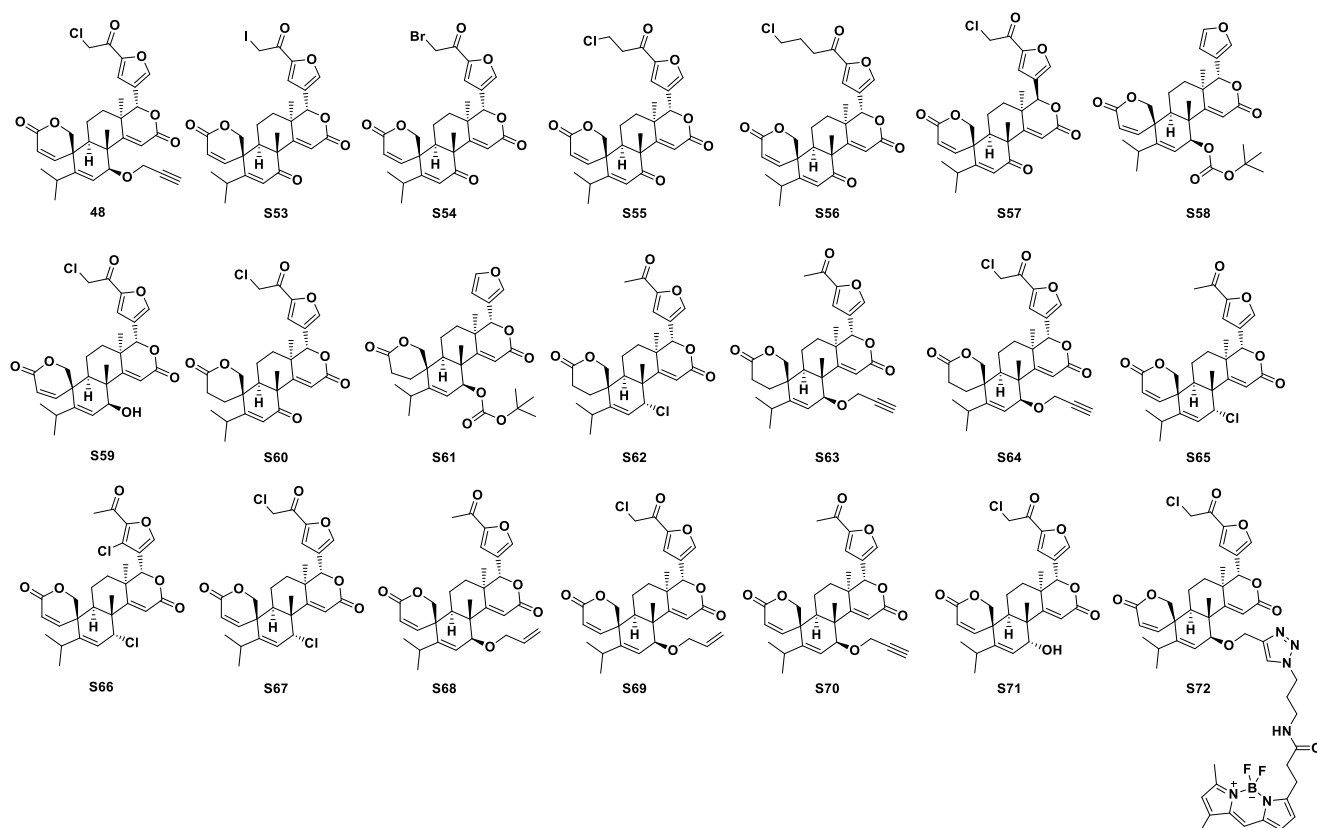

Figure S35. SAR derivatives and Intermediates of 23 (48, S53-S72).

## SUPPORTING INFORMATION

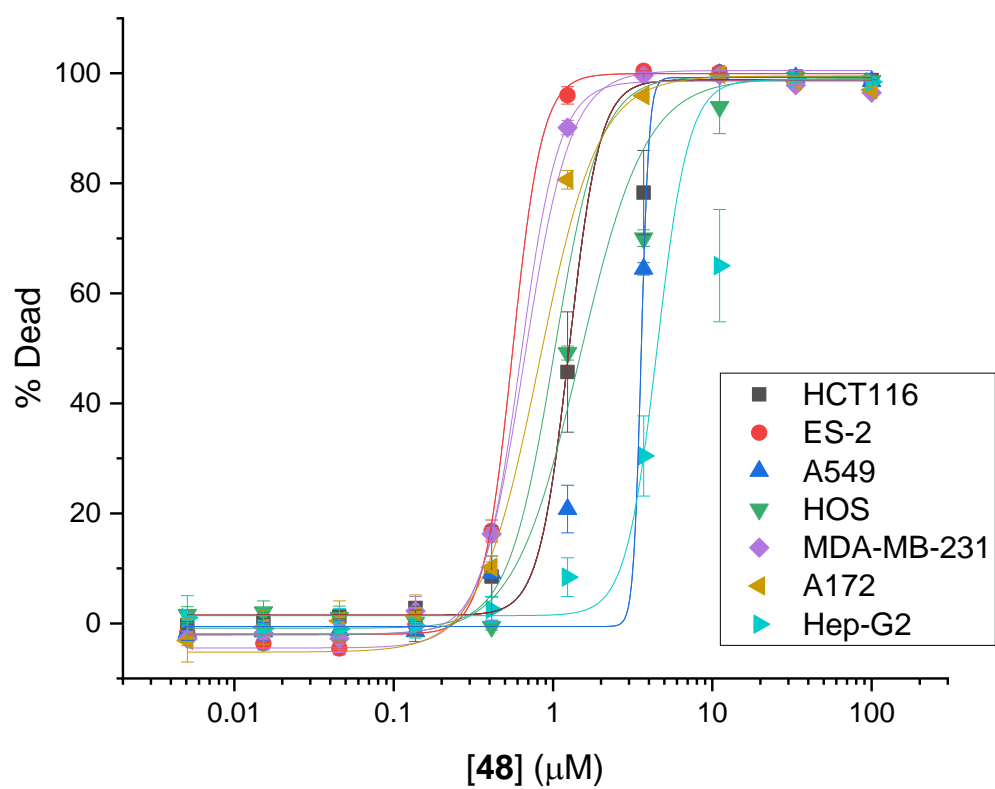

**Figure S36.** Dose-response curves for **48** against a panel of cancer cells. Bioactivity is expressed as a 72-hour  $\text{IC}_{50}$  value (in  $\mu\text{M}$ ) against a panel of cell lines, as measured by Alamar Blue assay. Data represent mean  $\pm$  SEM., Raptinal (50  $\mu\text{M}$ ) was used as dead control,  $n = 3$  biological replicates.



## SUPPORTING INFORMATION

## Mode of Cell Death

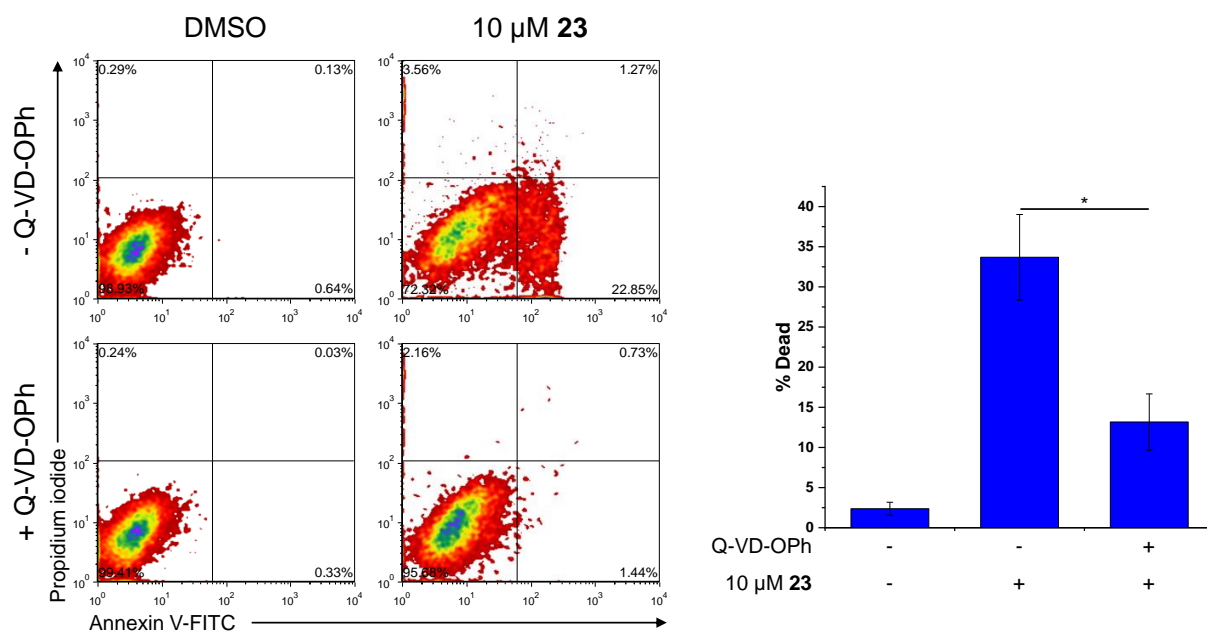

**Figure S37.** Compound **23** induces apoptotic cell death as assessed by Annexin V and propidium iodide staining. Cells are protected from death induced by **23** by pan-caspase inhibitor, Q-VD-OPh. HCT116 cells were pre-treated with 25 μM Q-VD-OPh and then incubated for 24 h before flow cytometry analysis. n=4, error is SEM, two-tailed t-test, \* p<0.05.

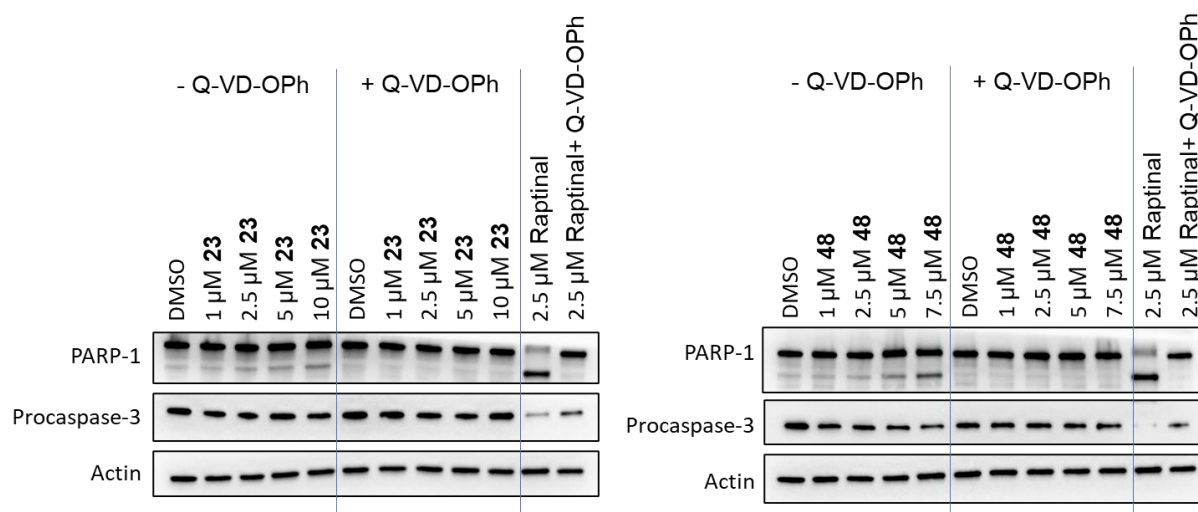

**Figure S38.** **23** and **48** induce apoptotic cell death after 24 hours. Western blot shows PARP-1 cleavage after 24-hour treatment with **23** and **48** in HCT116 cells. Cells are protected from death induced by **23** and **48** by pan-caspase inhibitor, Q-VD-OPh. 300,000 cells/well, 24 h incubation, 15 μg protein loading, for protection studies, HCT116 cells were pre-treated with 25 μM Q-VD-OPh and then incubated for 24 h, n=2.

## SUPPORTING INFORMATION

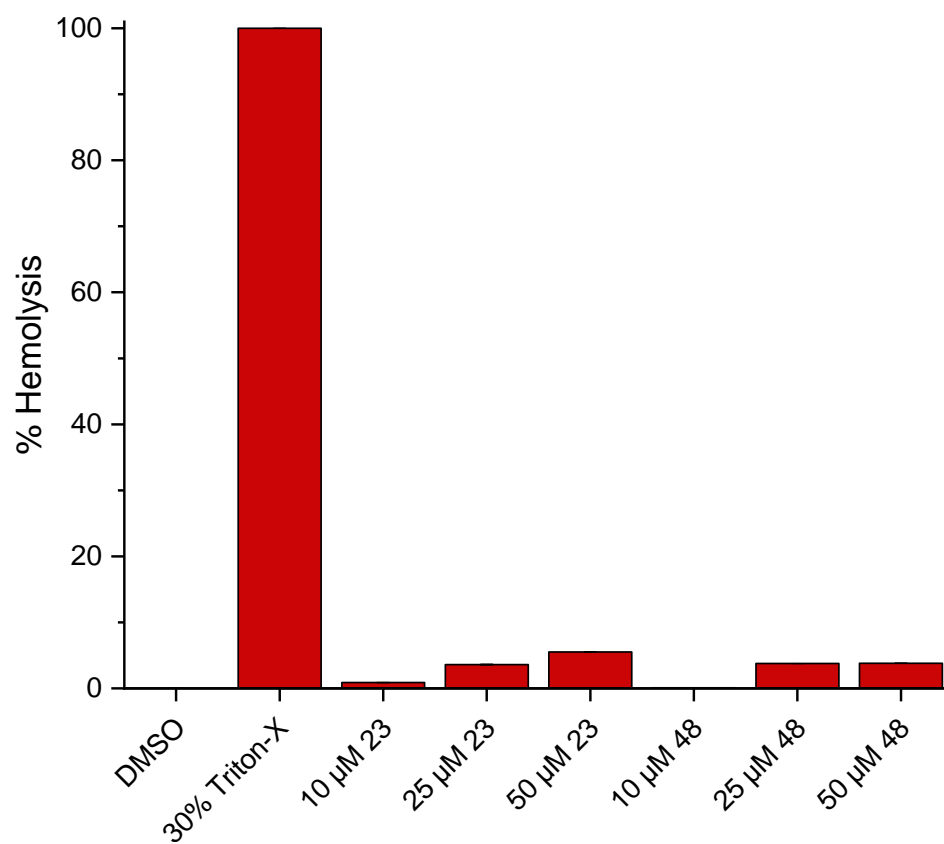

**Figure S39.** Lack of hemolytic activity of **23** and **48** in red blood cells, upon 2 hours treatment with 10, 25 and 50 µM of each compound; positive control: 30% Triton-X, negative control: DMSO, n=3 independent experiments.

## SUPPORTING INFORMATION

**Experimental Procedures****Methods and Characterization**

All chemical reagents were purchased from commercial sources and used without further purification. Limonin was purchased from Biopurify Phytochemicals Ltd (98% purity) and was used as received. Anhydrous dichloromethane, tetrahydrofuran, methanol, N,N-dimethylformamide, and acetonitrile used in this study were dried by percolation through columns packed with activated alumina under positive pressure of nitrogen. Reactions were monitored by LC-MS or thin layer chromatography using cerium molybdate and heat or  $\text{KMnO}_4$  and heat as developing agents. Flash chromatography was performed using silica gel (250-400 mesh). The automated reverse phase purification was performed on a Biotage Isolera using Agela Technologies AQ C18 spherical 20-35  $\mu\text{m}$  100A columns (12 and 40 g cartridges, 12 and 25 mL/min respectively) with gradient elution of  $\text{H}_2\text{O}:\text{MeCN}$  containing 0.1% formic acid. Final compounds were dried via lyophilization (Labconco FreeZone 2.5 L) to remove any residual solvents.

NMR spectra (including 2-D) were recorded on Bruker 500 spectrometer at 500 MHz for  $^1\text{H}$  NMR and 125 MHz for  $^{13}\text{C}$  NMR. Chemical shifts ( $\delta$  scale) are reported in parts per million (ppm) relative to the central peak of the solvent. Coupling constants (J) are given in hertz (Hz). Spectra were obtained in the following solvents (reference peaks included for  $^1\text{H}$  and  $^{13}\text{C}$  NMR):  $\text{CDCl}_3$  ( $^1\text{H}$  NMR: 7.26 ppm;  $^{13}\text{C}$  NMR: 77.23 ppm) and  $\text{DMSO-}d_6$  ( $^1\text{H}$  NMR: 2.50 ppm;  $^{13}\text{C}$  NMR: 39.52 ppm). NMR experiments were performed at room temperature. Chemical shift values for all  $^1\text{H}$  NMR and  $^{13}\text{C}$  NMR spectra are reported in parts per million (ppm).  $^1\text{H}$  NMR multiplicities are reported as: s = singlet, d = doublet, t = triplet, q = quartet, hept = heptet, m = multiplet, br = broad. High-resolution mass spectra (HRMS) were acquired using Waters Q-TOF Ultima ESI spectrometer. LCMS spectra were collected using an Agilent 6230 ESI TOF LC/MS spectrometers (10  $\mu\text{L}$  injection) with Agilent eclipse plus C18 columns (1.8  $\mu\text{m}$ , 2.1 x 50 mm) with a gradient of 2.5-80% acetonitrile in water with 0.1% formic acid (0 min 2.5%, 1 min 2.5%, 7 min 80%, 8 min 80%, 9 min 2.5%, 10 min 2.5%). Melting points (mp) were determined on a Thomas-Hoover capillary melting point apparatus. Optical rotation measurements were performed on a JASCO Model DIP-360 Digital Polarimeter at wavelength 589.

## SUPPORTING INFORMATION

## Limonin Derivatives Synthesis and Characterization

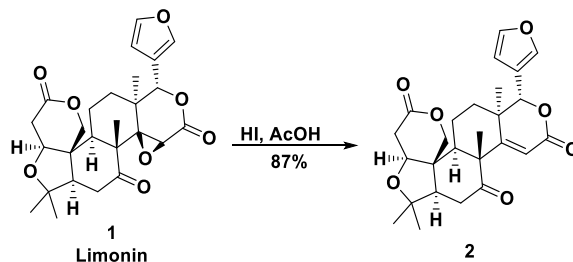

**Procedure:** A solution of **1** (4 g, 8.5 mmol) in acetic acid (64 mL) and hydriodic acid (64 mL) was heated under reflux for 3 h. The reaction mixture was cooled to room temperature, slowly poured into 400 mL of sodium sulfite saturated solution, and extracted three times with dichloromethane. The organic layers were combined, washed with brine, dried over  $\text{Na}_2\text{SO}_4$ , and concentrated by distillation under reduced pressure. The obtained crude residue was purified by silica gel flash chromatography (hexane-ethyl acetate 4:6) to provide **2** (3.36 g, 87%) as a white solid. Spectral data ( $^1\text{H NMR}$ ) was consistent with the literature reported value.<sup>[1]</sup>

**Note:** Formation of **10** (150 mg, ca. 5%) was observed by increasing reaction time to 12 h.

**$^1\text{H NMR}$  (DMSO- $d_6$ , 500 MHz):**  $\delta$  7.74 (d,  $J = 1.8$  Hz, 1H), 7.70 (dd,  $J = 1.8, 1.8$  Hz, 1H), 6.63 (s, 1H), 6.54 (d,  $J = 1.8$  Hz, 1H), 5.15 (s, 1H), 4.86 (d,  $J = 13.2$  Hz, 1H), 4.62 (d,  $J = 13.2$  Hz, 1H), 4.13 (d,  $J = 3.8$  Hz, 1H), 3.16 (t,  $J = 15.6$  Hz, 1H), 2.70 - 2.53 (m, 4H), 2.39 (dd,  $J = 15.6, 3.4$  Hz, 1H), 2.15 - 2.08 (m, 1H), 1.73-1.65 (m, 1H), 1.62 - 1.56 (m, 1H), 1.30 (s, 3H), 1.21 - 1.17 (m, 1H), 1.18 (s, 3H), 1.16 (s, 3H), 1.03 (s, 3H).

**$^{13}\text{C NMR}$  (DMSO- $d_6$ , 125 MHz):**  $\delta$  208.13, 170.77, 168.38, 165.34, 143.78, 142.27, 120.70, 116.84, 110.82, 81.60, 80.25, 78.58, 64.66, 56.47, 50.97, 45.69, 43.10, 38.39, 36.94, 36.11, 30.38, 26.36, 25.70, 21.98, 19.26, 16.60.

**HRMS(ESI):**  $m/z$  calc. for  $\text{C}_{26}\text{H}_{31}\text{O}_7$   $[\text{M}+\text{H}]^+$ : 455.2059, found: 455.2061.

**mp:**  $>260^\circ\text{C}$ .

**Opt. Rot.:**  $[\alpha]_{\text{D}}^{25} = -43$  ( $c = 0.14$ , acetone).

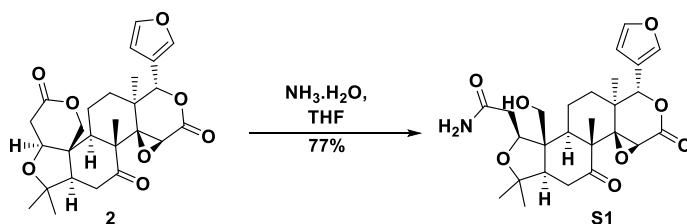

**Procedure:** Ammonium hydroxide (1 mL) was added dropwise to a solution of **1** (50 mg, 0.106 mmol) in tetrahydrofuran (1.5 mL) and the resulting mixture was stirred at  $30^\circ\text{C}$  for 8 h. The reaction mixture was then diluted with water, acidified with 2 M hydrochloric acid, and extracted with dichloromethane. The combined organic layers were washed with brine, dried over  $\text{Na}_2\text{SO}_4$  and concentrated by distillation under reduced pressure to yield a crude residue that was purified by silica gel flash chromatography (dichloromethane-methanol 97:3) to provide **S1** (40 mg, 77%) as a white solid. Spectral data ( $^1\text{H NMR}$  and  $^{13}\text{C NMR}$ ) were consistent with literature reported values.<sup>[2]</sup>

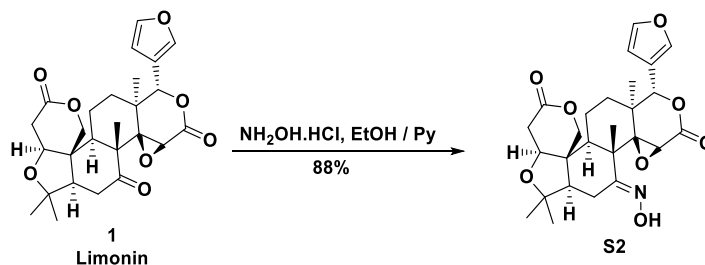

**Procedure:** Hydroxylamine hydrochloride (600 mg, 8.46 mmol) was added to a solution of **1** (500 mg, 1.06 mmol) in ethanol (25 mL) and pyridine (7.5 mL), and the resulting mixture was heated under reflux for 2.5 h. After completion, the reaction was cooled to room temperature, acidified to  $\text{pH} = 2$  by addition of 2 M hydrochloric acid, and extracted three times with dichloromethane. The combined organic layers were washed with brine, dried over  $\text{Na}_2\text{SO}_4$ , and concentrated by distillation under reduced pressure to yield a crude residue that was purified by silica gel flash chromatography (hexane-ethyl acetate 1:1) to provide **S2** (454 mg, 88%) as a white solid. Spectral data were consistent with the literature reported value.<sup>[1, 3]</sup>

## SUPPORTING INFORMATION

**Note:** The hydroxy group on the C=N double bond of **S2** adopts the *E* configuration.

**<sup>1</sup>H NMR (DMSO-*d*<sub>6</sub>, 500 MHz):** δ 10.84 (br s, 1H), 7.72 (d, *J* = 1.8 Hz, 1H), 7.66 (dd, *J* = 1.8, 1.8 Hz, 1H), 6.49 (d, *J* = 1.8 Hz, 1H), 5.42 (s, 1H), 4.79 (d, *J* = 13.0 Hz, 1H), 4.35 (d, *J* = 13.0 Hz, 1H), 4.06 (d, *J* = 3.9 Hz, 1H), 3.83 (s, 1H), 3.35 (dd, *J* = 14.6, 3.3 Hz, 1H), 2.79 (d, *J* = 16.5 Hz, 1H), 2.61 (dd, *J* = 16.5, 3.9 Hz, 1H), 2.34 (dd, *J* = 12.0, 2.3 Hz, 1H), 2.15 (t, *J* = 14.6 Hz, 1H), 1.93 (dd, *J* = 14.6, 3.3 Hz, 1H), 1.82 - 1.62 (m, 3H), 1.31 (d, *J* = 13.8 Hz, 1H), 1.18 (s, 3H), 1.15 (s, 3H), 1.04 (s, 3H), 0.88 (s, 3H).

**<sup>13</sup>C NMR (DMSO-*d*<sub>6</sub>, 125 MHz):** δ 170.34, 167.19, 158.84, 143.36, 141.58, 120.30, 110.24, 79.51, 78.52, 77.70, 65.52, 65.25, 58.93, 53.50, 49.02, 45.47, 45.23, 37.22, 35.80, 32.06, 30.08, 21.40, 20.82, 18.57, 18.35, 17.76.

**HRMS(ESI):** *m/z* calc. for C<sub>26</sub>H<sub>32</sub>NO<sub>8</sub> [M+H]<sup>+</sup>: 486.2130, found: 486.2128.

**mp:** decomposes upon heating above 230 °C.

**Opt. Rot.:** [α]<sub>D</sub><sup>25</sup> = -125 (c = 0.35, acetone).

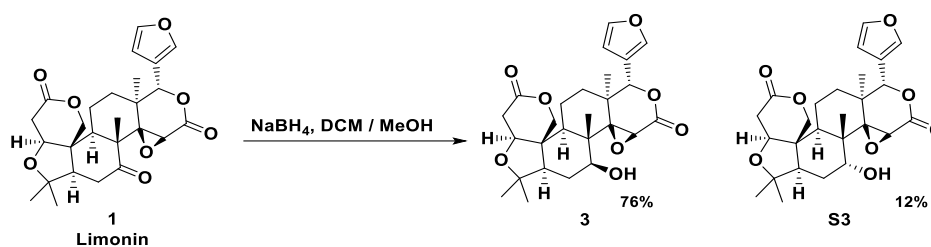

**Procedure:** A solution of NaBH<sub>4</sub> (230 mg, 6.08 mmol) in anhydrous methanol (10 mL) was added to a solution of **1** (500 mg, 1.06 mmol) in dichloromethane (20 mL) at -20 °C and the resulting mixture was stirred at -20 °C. After 15 minutes, the reaction was quenched by the addition of a 2 M hydrochloric acid solution and extracted three times with dichloromethane. The organic layers were dried over Na<sub>2</sub>SO<sub>4</sub> and concentrated by distillation under reduced pressure to obtain a crude residue that was purified by silica gel flash chromatography (hexane-ethyl acetate 4:6) to provide **3** (380 mg, 76%) and **S3** (60 mg, 12%) as white solids.

**Note:** Compound **3** is known,<sup>[3]</sup> however **3** has never been characterized. Compound **3** was crystallized by slow evaporation from dichloromethane and hexane.

**3** (380 mg, 76%)

**<sup>1</sup>H NMR (DMSO-*d*<sub>6</sub>, 500 MHz):** δ 7.71 (d, *J* = 1.8 Hz, 1H), 7.67 (dd, *J* = 1.8, 1.8 Hz, 1H), 6.50 (d, *J* = 1.8 Hz, 1H), 5.54 (s, 1H), 4.93 (d, *J* = 5.1 Hz, 1H), 4.46 (d, *J* = 2.0 Hz, 2H), 4.41 (s, 1H), 3.99 (d, *J* = 4.0 Hz, 1H), 3.72 (ddd, *J* = 5.0, 10.1, 15.2 Hz, 1H), 2.65 (d, *J* = 16.4 Hz, 1H), 2.56 (dd, *J* = 4.0, 16.4 Hz, 1H), 2.28 (dd, *J* = 12.1, 6.0 Hz, 1H), 2.01 (dd, *J* = 13.2, 2.6 Hz, 1H), 2.00 - 1.99 (m, 1H), 1.67 - 1.51 (m, 4H), 1.19 (s, 3H), 1.23 - 1.19 (m, 1H), 1.17 (s, 3H), 0.97 (s, 3H), 0.83 (s, 3H).

**<sup>13</sup>C NMR (DMSO-*d*<sub>6</sub>, 125 MHz):** δ 170.76, 168.53, 143.82, 142.30, 120.96, 120.96, 110.76, 80.20, 79.33, 77.94, 76.91, 73.49, 65.76, 55.60, 55.39, 45.64, 45.09, 43.43, 38.94, 36.16, 30.77, 28.41, 25.98, 21.99, 18.71, 17.32, 14.02.

**HRMS(ESI):** *m/z* calc. C<sub>26</sub>H<sub>33</sub>O<sub>8</sub> [M+H]<sup>+</sup>: 473.2175, found: 473.2173.

**mp:** 246-247 °C.

**Opt. Rot.:** [α]<sub>D</sub><sup>25</sup> = -14 (c = 0.15, acetone).

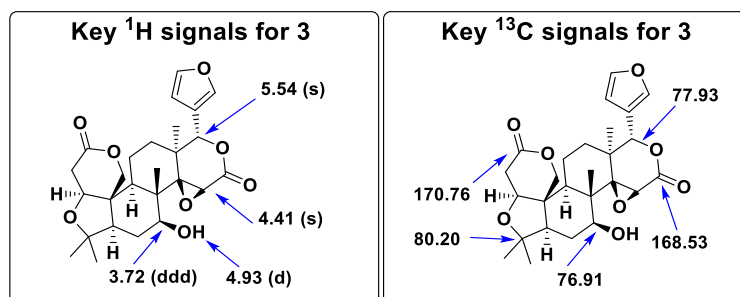

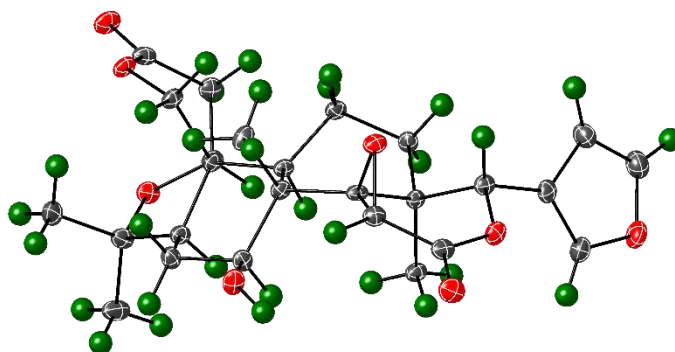

### Crystallography

**Experimental Protocol:** Intensity data were collected on a Bruker D8 Venture kappa diffractometer equipped with a Photon 100 CMOS detector. An I $\mu$ s microfocus Mo source ( $\lambda = 0.71073 \text{ \AA}$ ) coupled with a multi-layer mirror monochromator provided the incident beam. The sample was mounted on a 0.3 mm loop with the minimal amount of Paratone-N oil. Data was collected as a series of  $\varphi$  and/or  $\omega$  scans. Data was collected at 100 K using a cold stream of N<sub>2</sub>(g). The collection, cell refinement, and integration of intensity data was carried out with the APEX3 software.<sup>1</sup> A semi-empirical absorption correction was performed with SADABS.<sup>2</sup> The structure was phased with intrinsic methods using SHELXT<sup>3</sup> and refined with the full-matrix least-squares program SHELXL.<sup>4</sup>

CCDC: 2082412

(1) Bruker (2016). APEX3. Bruker AXS, Inc., Madison, Wisconsin, USA.

(2) L. Krause, R. Herbst-Irmer, G. M. Sheldrick, D. Stalke, *J. Appl. Cryst.*, **2015**, *48*, 3–10.

(3) G. M. Sheldrick, *Acta Cryst.* **2015**, *A71*, 3–8.

(4) G. M. Sheldrick, *Acta Cryst.* **2015**, *C71*, 3–8.

**Table S3.** Crystal data and structure refinement for dd43xsa.

|                                 |                                                                |
|---------------------------------|----------------------------------------------------------------|
| Identification code             | dd43xsa                                                        |
| Empirical formula               | C <sub>27</sub> H <sub>34</sub> Cl <sub>2</sub> O <sub>8</sub> |
| Formula weight                  | 557.44                                                         |
| Temperature                     | 100(2) K                                                       |
| Wavelength                      | 1.54178 Å                                                      |
| Crystal system                  | Monoclinic                                                     |
| Space group                     | P2 <sub>1</sub>                                                |
| Unit cell dimensions            | a = 10.0920(3) Å a = 90°.                                      |
|                                 | b = 11.8505(4) Å b = 109.4079(4)°.                             |
|                                 | c = 11.4639(4) Å c = 90°.                                      |
| Volume                          | 1293.12(7) Å <sup>3</sup>                                      |
| Z                               | 2                                                              |
| Density (calculated)            | 1.432 Mg/m <sup>3</sup>                                        |
| Absorption coefficient          | 2.685 mm <sup>-1</sup>                                         |
| F(000)                          | 588                                                            |
| Crystal size                    | 0.583 x 0.374 x 0.13 mm <sup>3</sup>                           |
| Theta range for data collection | 4.088 to 72.217°.                                              |
| Index ranges                    | -11 ≤ h ≤ 12, -14 ≤ k ≤ 14, -14 ≤ l ≤ 14                       |
| Reflections collected           | 31195                                                          |
| Independent reflections         | 5081 [R(int) = 0.0348]                                         |
| Completeness to theta = 67.679° | 100.0 %                                                        |
| Absorption correction           | Multiscan                                                      |
| Max. and min. transmission      | 1.0000 and 0.3578                                              |
| Refinement method               | Full-matrix least-squares on F <sup>2</sup>                    |

## SUPPORTING INFORMATION

Data / restraints / parameters 5081 / 1 / 342  
 Goodness-of-fit on F2 1.045  
 Final R indices [ $I > 2\sigma(I)$ ] R1 = 0.0265, wR2 = 0.0682  
 R indices (all data) R1 = 0.0265, wR2 = 0.0682  
 Absolute structure parameter 0.005(4)  
 Extinction coefficient 0.0034(5)  
 Largest diff. peak and hole 0.289 and -0.341 e.Å<sup>-3</sup>

**S3** (60 mg, 12%)

**Note:** Compound **S3** is known,<sup>[3]</sup> however **S3** has never been characterized

**<sup>1</sup>H NMR (DMSO-*d*<sub>6</sub>, 500 MHz):** δ 7.70 (d, *J* = 1.8 Hz, 1H), 7.67 (dd, *J* = 1.8, 1.8 Hz, 1H), 6.49 (d, *J* = 1.8 Hz, 1H), 5.50 (s, 1H), 5.02 (d, *J* = 3.5 Hz, 1H), 4.52 (d, *J* = 13.0 Hz, 1H), 4.40 (d, *J* = 13.0 Hz, 1H), 4.00 (d, *J* = 3.75 Hz, 1H), 3.91 (s, 1H), 3.39 (d, *J* = 2.9 Hz, 1H), 2.64 (dd, *J* = 16.5, 1.4 Hz, 1H), 2.59-2.53 (m, 2H), 2.48 (d, *J* = 2.7 Hz, 1H), 1.98 - 1.90 (m, 1H), 1.84 (dt, *J* = 13.7, 2.9 Hz, 1H), 1.70 - 1.56 (m, 2H), 1.50 (ddd, *J* = 2.7, 3.5, 13.7 Hz, 1H), 1.27 - 1.22 (m, 1H), 1.18 (s, 3H), 1.16 (s, 3H), 0.99 (s, 3H), 0.75 (s, 3H).  
**<sup>13</sup>C NMR (DMSO-*d*<sub>6</sub>, 125 MHz):** δ 170.76, 168.18, 143.79, 142.25, 121.11, 110.77, 80.36, 79.88, 78.23, 69.84, 69.24, 66.04, 57.33, 51.91, 45.80, 43.66, 42.00, 37.97, 36.26, 30.82, 26.75, 26.38, 22.13, 18.55, 17.63, 16.72.

**HRMS(ESI):** *m/z* calc. for C<sub>26</sub>H<sub>33</sub>O<sub>8</sub> [M+H]<sup>+</sup>: 473.2175, found: 473.2161.

**mp:** 240-242° C.

**Opt. Rot.:** [ $\alpha$ ]<sub>D</sub><sup>25</sup> = - 57 (*c* = 0.22, acetone).

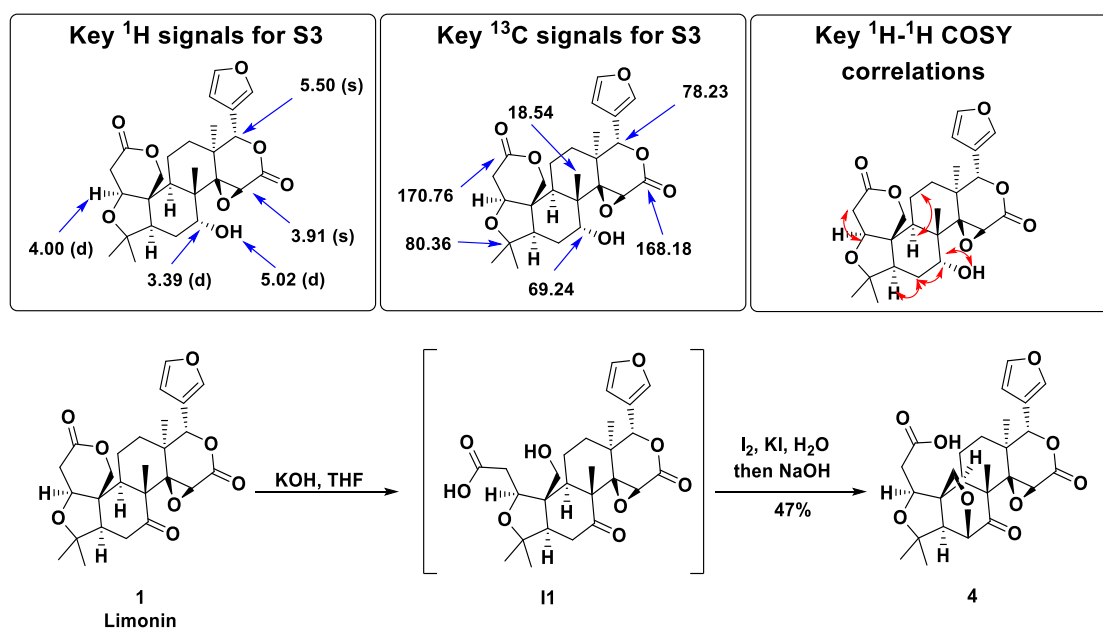

**Procedure:** **1** (1 g, 2.12 mmol) was dissolved in a solution of KOH (300 mg, 5.34 mmol) in methanol (40 mL), and the resulting solution was heated under reflux for 4 h. The solvent was evaporated under reduced pressure and the residue was taken up in water (20 mL). In a separate flask, Iodine (600 mg, 2.36 mmol) was dissolved in a solution of potassium iodide (600 mg, 3.61 mmol) in water (20 mL) and the resulting solution was added to the reaction mixture and allowed to stir for 5 minutes.

Sodium hydroxide 2M solution was added dropwise to the reaction mixture until the reaction turns yellow, and the resulting yellow solution was allowed to stir for an additional hour. Sodium sulfite (50 mg) was added to the reaction mixture and the resulting solution was acidified with 2M hydrochloric acid to pH 2. After standing a couple of hours, the precipitate was filtered off, dissolved in sodium bicarbonate 5% solution, and washed with dichloromethane (to remove the unreactive **1**). The bicarbonate solution was then acidified to pH 2 and extracted three times with dichloromethane. The organic layers (obtained from the extractions of the acidic solution) were combined, dried over Na<sub>2</sub>SO<sub>4</sub>, and concentrated by distillation under reduced pressure to afford pure **4** (505 mg, 47%) as a white solid.

**Note:** Compound **4** synthesis is known,<sup>[2]</sup> however **4** has never been characterized.

**<sup>1</sup>H NMR (DMSO-*d*<sub>6</sub>, 500 MHz):** δ 12.18 (br s, 1H), 7.71 (d, *J* = 1.8 Hz, 1H), 7.67 (dd, *J* = 1.8, 1.8 Hz, 1H), 6.50 (d, *J* = 1.8 Hz, 1H), 5.70 (s, 1H), 4.80 (s, 1H), 4.23 (dd, *J* = 9.9, 2.1 Hz, 1H), 4.18 (s, 1H), 4.09 (d, *J* = 9.1 Hz, 1H), 3.69 (d, *J* = 9.1 Hz, 1H), 2.81 (dd, *J* = 12.2, 5.9 Hz, 1H), 2.77 (s, 1H), 2.52 (dd, *J* = 15.8, 2.1 Hz, 1H), 2.11 (dd, *J* = 15.8, 9.9 Hz, 1H), 1.91 - 1.65 (m, 3H), 1.53 (s, 3H), 1.27 (s, 3H), 1.22 (s, 3H), 1.20 - 1.15 (m, 1H), 1.17 (s, 3H).

## SUPPORTING INFORMATION

**$^{13}\text{C}$  NMR (DMSO- $d_6$ , 125 MHz):**  $\delta$  207.23, 172.43, 168.41, 143.86, 142.28, 120.99, 110.67, 85.36, 78.79, 78.01, 76.59, 71.89, 66.45, 63.89, 57.78, 57.37, 47.34, 41.17, 40.60, 37.86, 30.60, 25.74, 25.49, 20.32, 19.84, 17.70.

**HRMS(ESI):**  $m/z$  calc. for  $\text{C}_{26}\text{H}_{31}\text{O}_9$   $[\text{M}+\text{H}]^+$ : 487.1968, found: 487.1976.

**mp:**  $>260^\circ\text{C}$ .

**Opt. Rot.:**  $[\alpha]_{\text{D}}^{25} = -82$  ( $c = 0.15$ , acetone).

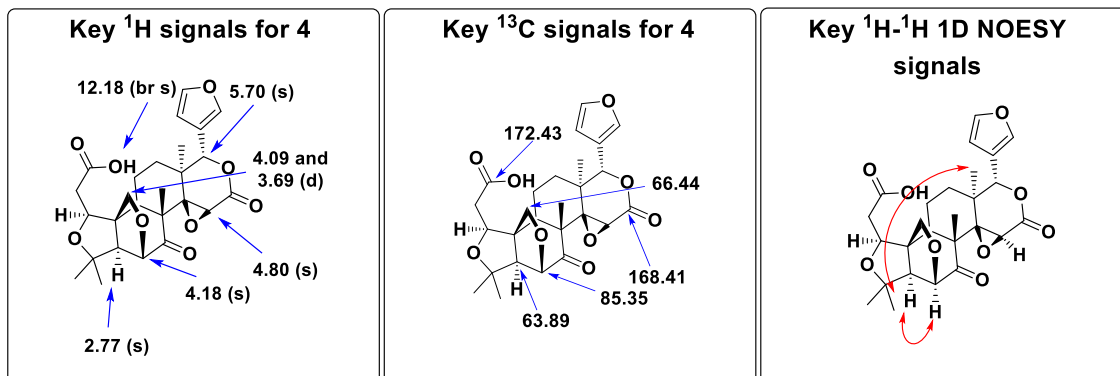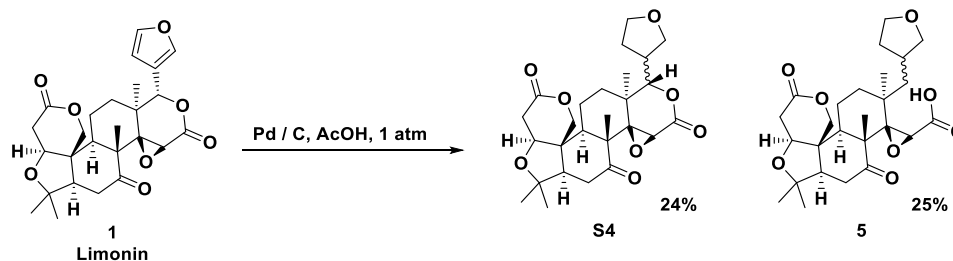

**Procedure:** A suspension of **1** (250 mg, 0.53 mmol) in acetic acid (12.5 mL) was hydrogenated in the presence of 10% Pd/C at 1 atm for 48 h. The catalyst was removed by filtration over celite, and the filtrate was evaporated under reduced pressure. The obtained residue was portioned between dichloromethane and a 2% solution of sodium bicarbonate. The aqueous layer was extracted three times with dichloromethane. The organic layers were combined, dried over  $\text{Na}_2\text{SO}_4$ , and concentrated by distillation under reduced pressure to obtain a crude residue that was purified by silica gel flash chromatography (hexane-ethyl acetate 3:7) to provide **S4** (60 mg, 24%) as a white solid.

**Note:** Compound **S4** synthesis is known,<sup>[2]</sup> however **S4** has never been fully characterized. **S4** exists as a mixture of two diastereomers.

**S4** (60 mg, 24%)

**$^1\text{H}$  NMR (DMSO- $d_6$ , 500 MHz):**  $\delta$  4.95 (s, 1H), 4.92 (s, 1H), 4.48-4.43 (m, 2H), 4.33 (d,  $J = 6.4$  Hz, 2H), 4.14 (d,  $J = 3.9$  Hz, 2H), 3.93 (s, 1H), 3.92 (s, 1H), 3.83 - 3.79 (m, 2H), 3.73 - 3.58 (m, 4H), 3.43 (dd,  $J = 17.5, 8.5$  Hz, 1H), 3.28 (dd,  $J = 8.1, 9.2$  Hz, 1H), 3.17 - 3.10 (m, 2H), 2.82 (dd,  $J = 16.5, 1.2$  Hz, 2H), 2.66 (dd,  $J = 16.5, 3.9$  Hz, 2H), 2.58 - 2.54 (m, 2H), 2.49 - 2.43 (m, 2H), 2.37 - 2.32 (m, 2H), 2.26 (dd,  $J = 14.7, 3.5$  Hz, 2H), 1.98 - 1.90 (m, 2H), 1.80 - 1.73 (m, 5H), 1.67 - 1.49 (m, 5H), 1.20 (s, 6H), 1.12 (s, 3H), 1.09 (s, 3H), 1.03 (s, 6H), 0.95 (s, 3H), 0.94 (s, 3H).

**$^{13}\text{C}$  NMR (DMSO- $d_6$ , 125 MHz):**  $\delta$  208.49, 170.72, 167.73, 167.62, 84.73, 82.93, 80.00, 79.98, 79.66, 78.93, 70.13, 69.76, 67.70, 67.42, 66.84, 66.59, 63.39, 65.37, 58.77, 58.63, 53.45, 53.41, 51.05, 50.96, 47.02, 46.86, 45.78, 45.76, 39.33, 39.20, 38.09, 37.95, 36.68, 36.19, 30.63, 30.18, 29.89, 29.11, 21.91, 20.75, 20.60, 18.32, 17.11, 17.02.

**HRMS(ESI):**  $m/z$  calc. for  $\text{C}_{26}\text{H}_{35}\text{O}_8$   $[\text{M}+\text{H}]^+$ : 475.2332, found: 475.2331.

**mp:**  $>260^\circ\text{C}$ .

**Opt. Rot.:**  $[\alpha]_{\text{D}}^{25} = -139$  ( $c = 0.18$ , acetone).

**5** was obtained by acidification of the sodium bicarbonate aqueous solution with hydrochloric acid to pH 2. The obtained acidic solution was extracted three times with dichloromethane. The organic layers were combined, dried over  $\text{Na}_2\text{SO}_4$ , and concentration under vacuum. Using this procedure, **5** can be obtained pure (63 mg, 25%) as a white solid.

**Note:** Compound **5** synthesis is known,<sup>[2]</sup> however **5** has never been fully characterized. **5** exists as a mixture of two diastereomers.

**5** (63 mg, 25%)

**$^1\text{H}$  NMR (DMSO- $d_6$ , 500 MHz):**  $\delta$  13.23 (br s, 2H), 4.66 (dd,  $J = 13.1, 3.7$  Hz, 2H), 4.54 (d,  $J = 13.1$  Hz, 2H), 4.30 (d,  $J = 3.7$  Hz, 2H), 3.93 (t,  $J = 7.6$  Hz, 1H), 3.85 (t,  $J = 7.6$  Hz, 1H), 3.76 - 3.60 (m, 4H), 3.30 (s, 1H), 3.29 (s, 1H), 3.17 (t,  $J = 8.2$  Hz, 1H), 3.09 (t,  $J = 8.2$



## SUPPORTING INFORMATION

Hz, 1H), 2.91-2.84 (m, 2H), 3.83 - 2.79 (m, 2H), 2.70 (dd,  $J = 16.4$  3.5 Hz, 2H), 2.54 - 2.45 (m, 6H), 2.25 - 2.17 (m, 2H), 2.15 - 2.01 (m, 4H), 1.90 - 1.82 (m, 2H), 1.78 - 1.63 (m, 5H), 1.58 - 1.44 (m, 4H), 1.44 - 1.37 (m, 1H), 1.28 (s, 6H), 1.19 (s, 3H), 1.18 (s, 3H), 1.05 (s, 6H), 1.04 (s, 6H).

**$^{13}\text{C}$  NMR (DMSO- $d_6$ , 125 MHz):**  $\delta$  207.69, 207.59, 170.95, 170.05, 80.32, 78.46, 78.42, 74.40, 74.38, 71.77, 71.71, 67.30, 67.27, 64.19, 64.16, 60.23, 57.94, 57.86, 55.82, 55.39, 51.47, 51.39, 48.07, 47.70, 45.84, 45.82, 43.44, 43.39, 36.82, 36.78, 36.38, 36.14, 36.11, 35.17, 13.98, 34.93, 34.87, 30.78, 27.18, 27.09, 22.19, 20.02, 19.98, 18.43, 18.33.

**HRMS(ESI):**  $m/z$  calc. for  $\text{C}_{26}\text{H}_{37}\text{O}_8$   $[\text{M}+\text{H}]^+$ : 477.2488, found: 477.2493.

**mp:** 162-164° C.

**Opt. Rot.:**  $[\alpha]_{\text{D}}^{25} = -14$  ( $c = 0.13$ , acetone).

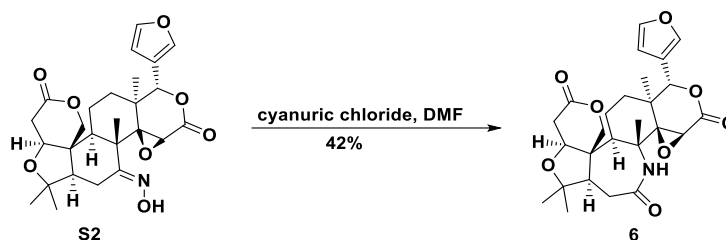

**Procedure:** Cyanuric chloride (38 mg, 0.206 mmol) was added to a dry oven flask and dissolved in DMF (0.5 mL). The resulting solution was stirred until the solution turns yellow, then, **S2** (50 mg, 0.103 mmol) in DMF (0.25 mL) was added. The resulting mixture was stirred at 60° C for 48 h. The solvent was removed under vacuum, and the residue was taken up in water and dichloromethane. The aqueous layer was extracted three times with dichloromethane and the combined organic phases were washed with brine and dried over  $\text{Na}_2\text{SO}_4$ . The solvent was concentrated by distillation under reduced pressure to obtain a crude residue that was purified by silica gel flash chromatography (hexane-ethyl acetate 3:7) to provide **6** (21 mg, 42%) as a white solid.

**$^1\text{H}$  NMR (DMSO- $d_6$ , 500 MHz):**  $\delta$  8.21 (br s, 1H), 7.73 (d,  $J = 1.7$  Hz, 1H), 7.68 (dd,  $J = 1.7, 1.7$  Hz, 1H), 6.49 (d,  $J = 1.7$  Hz, 1H), 5.25 (s, 1H), 4.83 (d,  $J = 13.0$  Hz, 1H), 4.41 (d,  $J = 13.0$  Hz, 1H), 4.19 (d,  $J = 3.8$  Hz, 1H), 3.76 (s, 1H), 3.13 (dd,  $J = 12.5, 16.9$  Hz, 1H), 2.91 (d,  $J = 16.0$  Hz, 1H), 2.63 (dd,  $J = 16.0, 3.8$  Hz, 1H), 2.37 - 2.33 (m, 2H), 2.16 (d,  $J = 16.9$  Hz, 1H), 1.78-1.70 (m, 2H), 1.46 - 1.37 (m, 1H), 1.35-1.29 (m, 1H), 1.26 (s, 3H), 1.18 (s, 3H), 0.97 (s, 3H), 0.95 (s, 3H).

**$^{13}\text{C}$  NMR (DMSO- $d_6$ , 125 MHz):**  $\delta$  175.60, 171.06, 165.86, 143.86, 142.03, 120.50, 110.70, 81.74, 80.31, 77.83, 68.39, 65.58, 59.93, 55.39, 55.12, 54.61, 51.61, 49.02, 37.23, 36.33, 34.06, 33.06, 30.62, 22.21, 20.99, 20.38.

**HRMS(ESI):**  $m/z$  calc. for  $\text{C}_{26}\text{H}_{32}\text{O}_8$   $[\text{M}+\text{H}]^+$ : 486.2128, found: 486.2122.

**mp:** >260° C.

**Opt. Rot.:**  $[\alpha]_{\text{D}}^{25} = -99$  ( $c = 0.13$ , acetone).

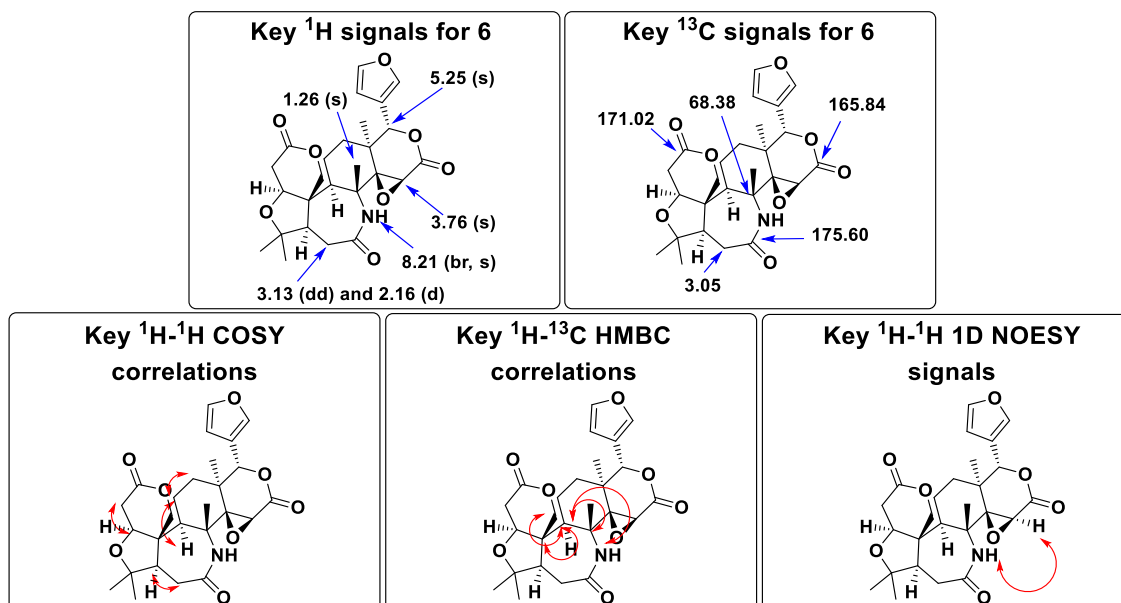

## SUPPORTING INFORMATION

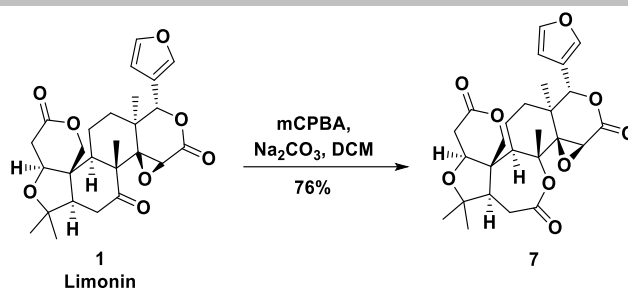

**Procedure:** Sodium carbonate (63 mg, 0.594 mmol) was added to a solution of **1** (50 mg, 0.106 mmol) in dichloromethane (1.3 mL) and the resulting mixture was stirred for 30 minutes at 0° C. Then, *m*CPBA (69 mg, 0.40 mmol) was added and the reaction was stirred at 30° C for 2 h. The reaction was quenched with water and extracted three times with dichloromethane. The combined organic layers were washed with brine, dried over Na<sub>2</sub>SO<sub>4</sub>, and concentrated by distillation under reduced pressure to yield a crude residue that was by silica gel flash chromatography (hexane-ethyl acetate 3:7) to provide **7** (39 mg, 76%) as a white solid.

**<sup>1</sup>H NMR (CDCl<sub>3</sub>, 500 MHz):** δ 7.45 (d, *J* = 1.7 Hz, 1H), 7.45 (dd, *J* = 1.7, 1.7 Hz, 1H), 6.39 (d, *J* = 1.7 Hz, 1H), 5.42 (s, 1H), 4.69 (d, *J* = 13.1 Hz, 1H), 4.41 (d, *J* = 13.1 Hz, 1H), 4.17 (t, *J* = 2.6 Hz, 1H), 3.94 (s, 1H), 3.52 (dd, *J* = 17.0, 3.5 Hz, 1H), 2.93 - 2.80 (m, 2H), 2.80 (dd, *J* = 17.0, 2.6 Hz, 1H), 2.62 (dd, *J* = 12.6, 1.7 Hz, 1H), 2.39 (dd, *J* = 12.8, 1.9 Hz, 1H), 1.91 - 1.85 (m, 2H), 1.62 - 1.53 (m, 2H), 1.38 (s, 3H), 1.34 (s, 3H), 1.23 (s, 3H), 1.14 (s, 3H).

**<sup>13</sup>C NMR (CDCl<sub>3</sub>, 125 MHz):** δ 170.29, 168.98, 165.38, 143.43, 141.13, 119.45, 109.64, 85.33, 81.88, 80.15, 77.67, 68.66, 64.96, 55.09, 53.73, 52.20, 48.44, 36.73, 36.46, 33.55, 32.24, 30.40, 22.17, 21.23, 20.78, 19.56.

**HRMS(ESI):** *m/z* calc. for C<sub>26</sub>H<sub>31</sub>O<sub>9</sub> [M+H]<sup>+</sup>: 487.1968, found: 487.1975.

**mp:** decomposes upon heating above 237° C.

**Opt. Rot.:** [α]<sub>D</sub><sup>25</sup> = -92 (c = 0.11, acetone).

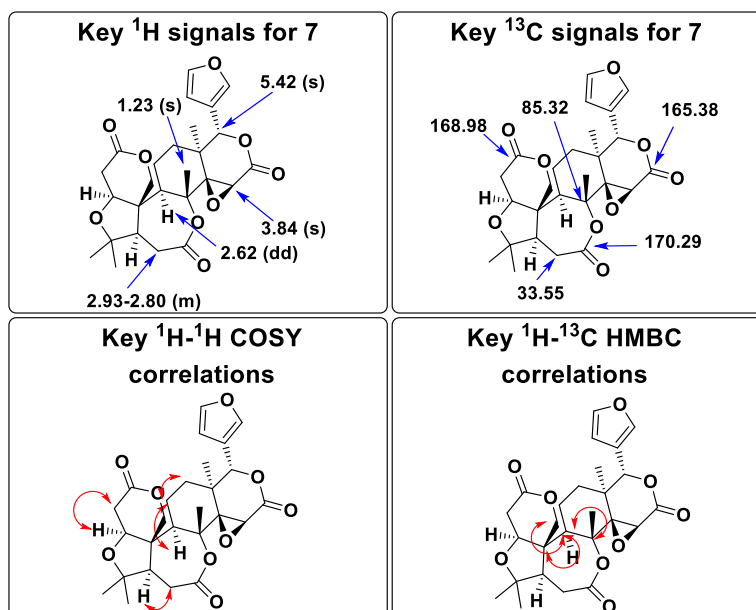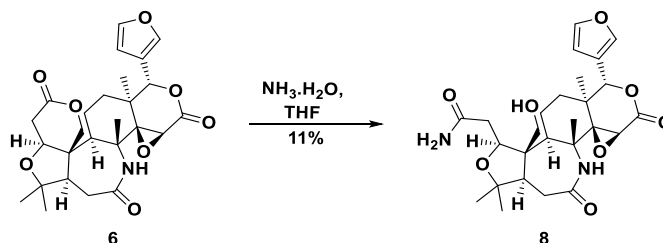

**Procedure:** Ammonium hydroxide (4 mL) was added dropwise to a solution of **6** (200 mg, 0.41 mmol) in THF (7 mL) at 0° C and the resulting mixture was stirred at 30° C for 16 h. The reaction mixture was diluted with water, acidified with 2 M hydrochloric acid, and extracted three times with dichloromethane. The combined organic layers were washed with brine, dried over Na<sub>2</sub>SO<sub>4</sub>, and

## SUPPORTING INFORMATION

concentrated by distillation under reduced pressure to yield a crude residue that was purified by crystallization using dichloromethane and hexane to provide **8** (22 mg, 11%) as a white solid.

**<sup>1</sup>H NMR (DMSO-*d*<sub>6</sub>, 500 MHz):** δ 8.12 (s, 1H), 7.71 (d, *J* = 1.7 Hz, 1H), 7.67 (dd, *J* = 1.7, 1.7 Hz, 1H), 7.21 (d, *J* = 2.3 Hz, 1H), 6.74 (d, *J* = 2.3 Hz, 1H), 6.48 (d, *J* = 1.7 Hz, 1H), 5.24 (s, 1H), 4.51 (t, *J* = 3.5 Hz, 1H), 3.91 (d, *J* = 8.2 Hz, 1H), 3.91 (dd, *J* = 11.1, 3.5 Hz, 1H), 3.79 (dd, *J* = 11.1, 3.5 Hz, 1H), 3.71 (s, 1H), 2.93 (dd, *J* = 16.9, 12.9 Hz, 1H), 2.84 (dd, *J* = 15.6, 3.2, 1H), 2.35 (dd, *J* = 15.6, 8.2 Hz, 1H), 2.05 - 2.01 (m, 3H), 1.86 (dd, *J* = 14.7, 6.5 Hz, 1H), 1.67 (dd, *J* = 14.7, 6.1 Hz, 1H), 1.60 - 1.51 (m, 1H), 1.29 (s, 3H), 1.26 (s, 3H), 1.16-1.10 (m, 1H), 1.10 (s, 3H), 0.88 (s, 3H).

**<sup>13</sup>C NMR (DMSO-*d*<sub>6</sub>, 125 MHz):** δ 175.76, 173.30, 166.11, 143.81, 141.99, 120.57, 110.73, 83.66, 78.90, 77.91, 68.69, 60.95, 59.88, 55.76, 54.16, 52.62, 51.47, 40.59, 36.54, 34.55, 34.09, 30.10, 24.77, 24.27, 20.65, 19.85.

**HRMS(ESI):** *m/z* calc. for C<sub>26</sub>H<sub>35</sub>N<sub>2</sub>O<sub>8</sub> [M+H]<sup>+</sup>: 503.2393, found: 503.2397.

**mp:** decomposes upon heating above 223° C.

**Opt. Rot.:** [α]<sub>D</sub><sup>25</sup> = - 69 (c = 0.19, acetone).

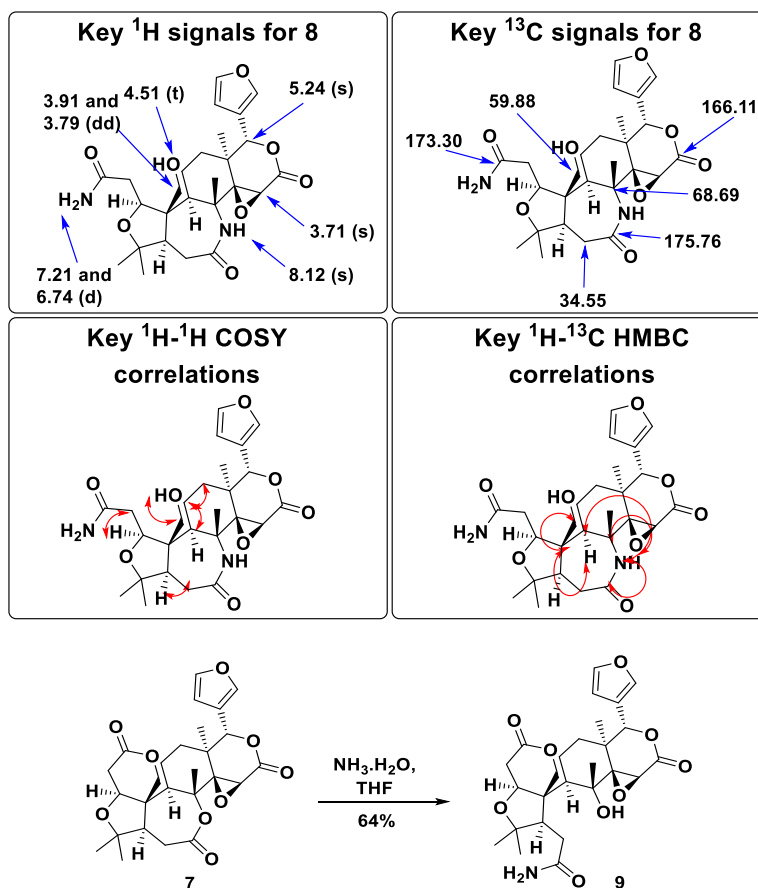

**Procedure:** Ammonium hydroxide (2 mL) was added dropwise to a solution of **7** (100 mg, 0.205 mmol) in THF (3.4 mL) at 0° C and the resulting mixture was stirred at 30° C for 16 h. The reaction mixture was diluted with water, acidified with 2M hydrochloric acid, and extracted three times with dichloromethane. The combined organic layers were washed with brine, dried over Na<sub>2</sub>SO<sub>4</sub>, and concentrated by distillation under reduced pressure to yield a crude residue that was purified by silica gel flash chromatography (dichloromethane–methanol 9:1) to provide **9** (39 mg, 64%) as a white solid.

**<sup>1</sup>H NMR (DMSO-*d*<sub>6</sub>, 500 MHz):** δ 7.75 (d, *J* = 1.7 Hz, 1H), 7.68 (dd, *J* = 1.7, 1.7 Hz, 1H), 7.47 (br s, 1H), 6.85 (br s, 1H), 6.53 (d, *J* = 1.7 Hz, 1H), 5.39 (s, 1H), 5.19 (s, 1H), 4.49 (br s, 1H), 4.33 (d, *J* = 12.8, 1H), 4.27 (d, *J* = 12.8 Hz, 1H), 3.84 (s, 1H), 3.18 (br s, 1H), 2.88 (dd, *J* = 16.1, 4.4 Hz, 1H), 2.47 (d, *J* = 16.1 Hz, 1H), 2.30 - 2.25 (m, 3H), 1.83 - 1.79 (m, 1H), 1.76 - 1.72 (m, 1H), 1.38 - 1.25 (m, 2H), 1.22 (s, 3H), 1.20 (s, 3H), 1.04 (s, 3H), 1.02 (s, 3H).

**<sup>13</sup>C NMR (CDCl<sub>3</sub>+ CD<sub>3</sub>OD, 125 MHz):** δ 175.09, 171.56, 167.82, 143.17, 141.02, 119.80, 109.90, 83.26, 77.89, 76.48, 70.33, 68.74, 52.61, 51.34, 50.04, 36.91, 36.57, 34.18, 33.40, 31.58, 28.59, 24.86, 22.01, 20.33, 19.66, 14.10

**HRMS(ESI):** *m/z* calc. for C<sub>26</sub>H<sub>34</sub>NO<sub>9</sub> [M+H]<sup>+</sup>: 504.2234, found: 504.2224.

**mp:** 202-203° C.

**Opt. Rot.:** [α]<sub>D</sub><sup>25</sup> = - 47 (c = 0.14, acetone).

## SUPPORTING INFORMATION

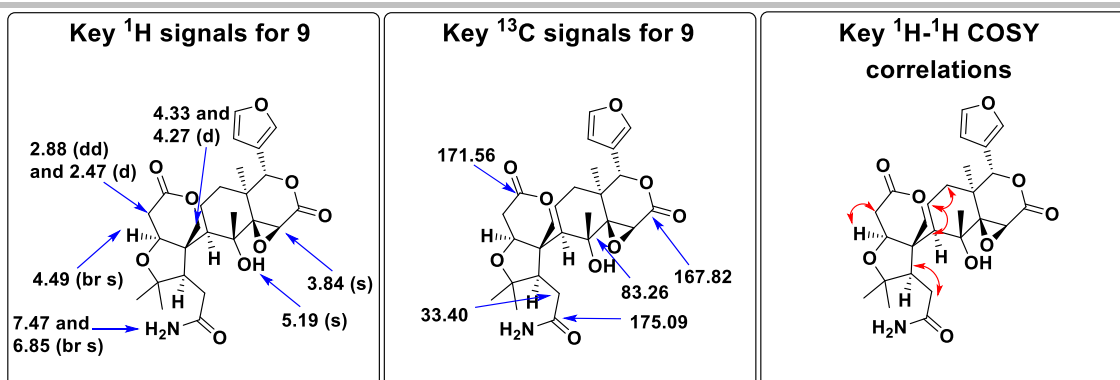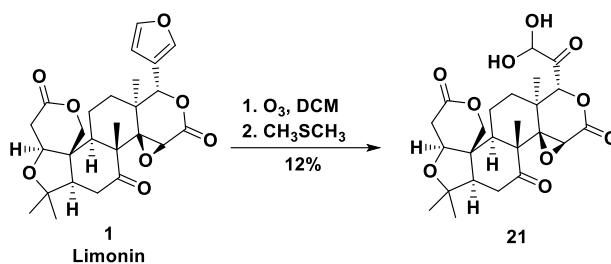

**Procedure:** Ozone was passed through a solution of **1** (300 mg, 0.64 mmol) in dichloromethane (15 mL) at  $-78^\circ\text{C}$  until blue color persists. After reaction completion, residual ozone was purged 5 minutes under  $\text{N}_2$  and, then, dimethylsulfide (0.1 mL) was added to the mixture. The reaction was allowed to stir at  $30^\circ\text{C}$  for additional 12 h before brine was added to the solution. The aqueous layer was extracted three times with dichloromethane. The combined organic layers were dried over  $\text{Na}_2\text{SO}_4$  and concentrated by distillation under reduced pressure to yield a crude residue that was purified by silica gel flash chromatography (dichloromethane–methanol 9:1) to provide **21** (37 mg, 12%) as a white solid.

**$^1\text{H}$  NMR (DMSO- $d_6$ , 500 MHz):**  $\delta$  6.75 (dd,  $J = 7.7, 6.0$  Hz, 2H), 5.29 (s, 1H), 5.10 (t,  $J = 7.7$  Hz, 1H), 4.90 (d,  $J = 13.0$  Hz, 1H), 4.47 (d,  $J = 13.0$  Hz, 1H), 4.10 (d,  $J = 4.1$  Hz, 1H), 4.14 (s, 1H), 3.09 (t,  $J = 15.5$  Hz, 1H), 2.79 (d,  $J = 16.5$  Hz, 1H), 2.63 (dd,  $J = 16.5, 4.1$  Hz, 1H), 2.57 (dd,  $J = 12.0, 4.0$  Hz, 1H), 2.48 (d,  $J = 3.4$  Hz, 1H), 2.26 (dd,  $J = 15.5, 3.4$  Hz, 1H), 1.91 - 1.84 (m, 2H), 1.79 - 1.69 (m, 2H), 1.18 (s, 3H), 1.15 (s, 3H), 1.02 (s, 3H), 0.99 (s, 3H).

**$^{13}\text{C}$  NMR (CDCl $_3$ + CD $_3$ OD, 125 MHz):**  $\delta$  208.41, 202.80, 170.76, 167.04, 88.76, 80.61, 80.02, 78.90, 67.19, 65.21, 58.04, 54.19, 50.50, 46.31, 45.67, 38.47, 36.63, 36.21, 30.24, 28.67, 21.93, 19.93, 17.91, 17.68.

**HRMS(ESI):**  $m/z$  calc. for  $\text{C}_{24}\text{H}_{31}\text{O}_{10}$   $[\text{M}+\text{H}]^+$ : 479.1917, found: 479.1933.

**mp:** decomposes upon heating above  $185^\circ\text{C}$ .

**Opt. Rot.:**  $[\alpha]_{\text{D}}^{25} = -111$  ( $c = 0.13$ , acetone).

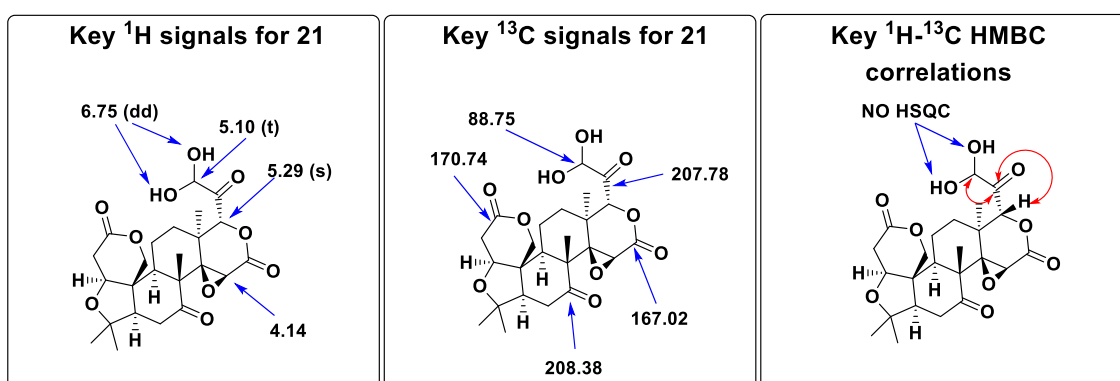

## SUPPORTING INFORMATION

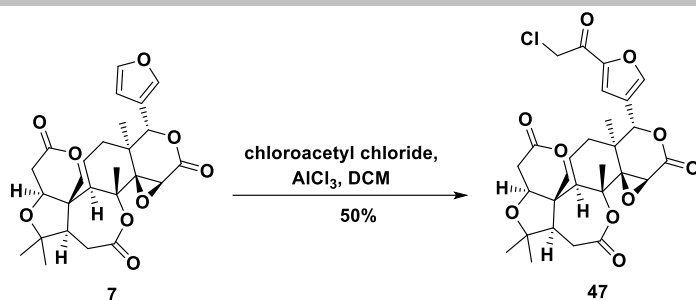

**Procedure:**  $\text{AlCl}_3$  (60 mg, 0.45 mmol) was added at 0° C to a cooled solution of **7** (50 mg, 0.10 mmol) in dichloromethane (2 mL). The resulting mixture was stirred 30 minutes, before chloroacetyl chloride (10  $\mu\text{L}$ , 0.12 mmol) was added to the solution. The resulting solution was stirred at 30° C for 12 h. Water was added and the aqueous layer was extracted three times with dichloromethane. The combined organic layers were washed with 2M sodium hydroxide and brine. After drying over  $\text{Na}_2\text{SO}_4$ , the solution was concentrated by distillation at reduced pressure, and the residue was purified by flash chromatography on silica gel (hexane-ethyl acetate 1:1) to obtain **47** (28 mg, 50%) as a white solid.

**$^1\text{H}$  NMR (DMSO- $d_6$ , 500 MHz):**  $\delta$  8.19 (s, 1H), 7.70 (s, 1H), 5.52 (s, 1H), 4.93 (s, 2H), 4.91 (d,  $J = 13.0$  Hz, 1H), 4.44 (d,  $J = 13.0$  Hz, 1H), 4.24 (d,  $J = 3.6$  Hz, 1H), 3.99 (s, 1H), 3.45 (dd,  $J = 18.0, 12.9$  Hz, 1H), 2.89 (dd,  $J = 16.5, 1.5$  Hz, 1H), 2.69 – 2.58 (m, 3H), 2.49 (d,  $J = 12.9$  Hz, 1H), 1.87 – 1.80 (m, 2H), 1.49 – 1.33 (m, 2H), 1.25 (s, 3H), 1.21 (s, 3H), 1.16 (s, 3H), 0.96 (s, 3H).

**$^{13}\text{C}$  NMR (DMSO- $d_6$ , 125 MHz):**  $\delta$  180.69, 172.23, 170.81, 166.58, 150.09, 147.48, 122.99, 120.11, 85.86, 81.58, 79.96, 77.13, 69.38, 65.13, 53.77, 53.05, 51.70, 48.16, 46.21, 36.97, 36.52, 33.10, 31.37, 30.21, 22.19, 20.44, 20.42, 18.63.

**HRMS(ESI):**  $m/z$  calc. for  $\text{C}_{28}\text{H}_{32}\text{O}_{10}\text{Cl}$   $[\text{M}+\text{H}]^+$ : 563.1684, found: 563.1686.

**mp:** decomposes upon heating above 174° C.

**Opt. Rot.:**  $[\alpha]_{\text{D}}^{25} = -59$  ( $c = 0.10$ , acetone).

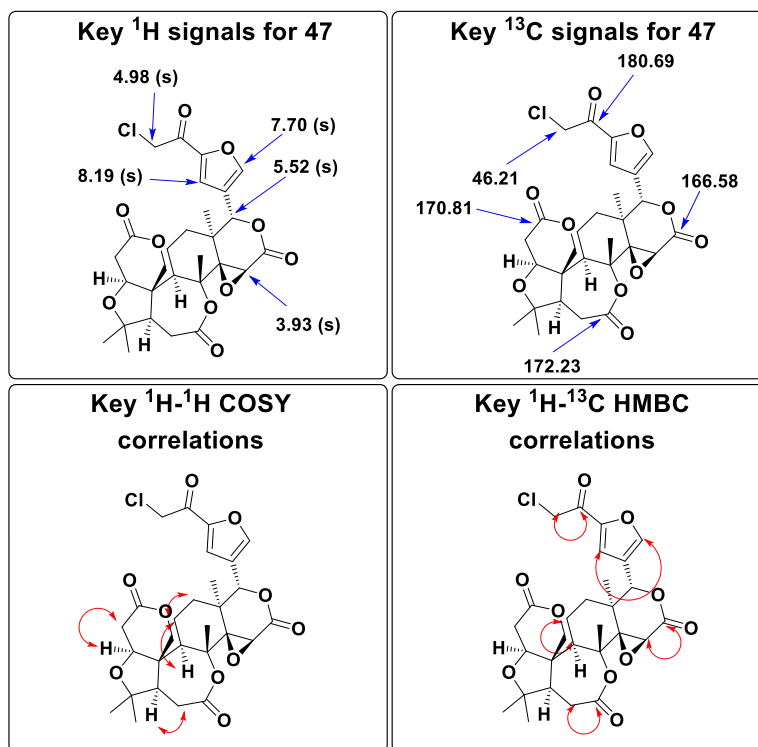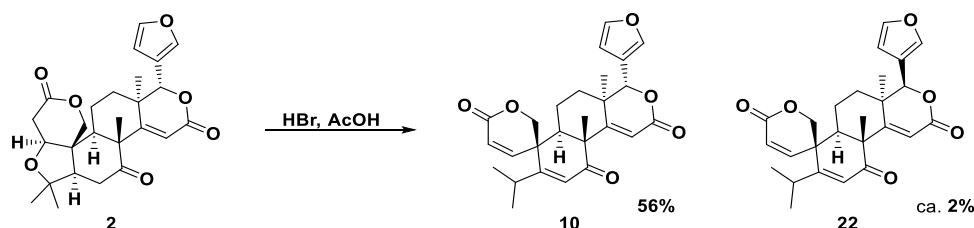

## SUPPORTING INFORMATION

**Procedure:** Hydrobromic acid (48% in acetic acid, 5 mL) was added to a solution of **2** (500 mg, 0.66 mmol) in glacial acetic acid (2.5 mL) and the resulting solution was heated to 60° C for 2 h. The reaction mixture was then cooled to 0° C and quenched with sodium sulfite saturated solution. The aqueous layer was extracted three times with dichloromethane. The combined organic layers were washed with brine, dried over Na<sub>2</sub>SO<sub>4</sub>, concentrated by distillation at reduced pressure, and the obtained residue was purified by flash chromatography on silica gel (hexane-ethyl acetate 6:4), giving **10** and **22** as white solids.

**10** (163 mg, 56%)

**Note:** Compound **10** is known,<sup>[4]</sup> however **10** has never been fully characterized.

**<sup>1</sup>H NMR (DMSO-*d*<sub>6</sub>, 500 MHz):** δ 7.75 (d, *J* = 1.7 Hz, 1H), 7.70 (d, *J* = 1.7, 1.7 Hz, 1H), 6.82 (d, *J* = 9.9 Hz, 1H), 6.56 (d, *J* = 1.7 Hz, 1H), 6.43 (s, 1H), 6.26 (d, *J* = 9.9 Hz, 1H), 6.12 (s, 1H), 5.21 (s, 1H), 4.81 (d, *J* = 12.4 Hz, 1H), 4.63 (d, *J* = 12.4 Hz, 1H), 2.67 (dd, *J* = 12.7, 5.4 Hz, 1H), 2.44 – 2.37 (m, 1H), 1.90 – 1.82 (m, 1H), 1.76 – 1.61 (m, 2H), 1.44 (s, 3H), 1.27 – 1.21 (m, 1H), 1.13 (d, *J* = 6.7 Hz, 3H), 1.08 (d, *J* = 6.7 Hz, 3H), 1.07 (s, 3H).

**<sup>13</sup>C NMR (DMSO-*d*<sub>6</sub>, 125 MHz):** δ 197.75, 169.37, 166.58, 164.86, 162.66, 150.05, 143.82, 142.23, 124.89, 123.03, 120.63, 118.40, 110.83, 81.03, 69.86, 48.30, 45.49, 40.59, 37.77, 30.82, 27.76, 25.31, 24.12, 23.94, 20.94, 17.50.

**HRMS(ESI):** *m/z* calc. for C<sub>26</sub>H<sub>29</sub>O<sub>6</sub> [M+H]<sup>+</sup>: 473.1964, found: 437.1965.

**mp:** >260° C.

**Opt. Rot.:** [α]<sub>D</sub><sup>25</sup> = - 106 (c = 0.30, acetone).

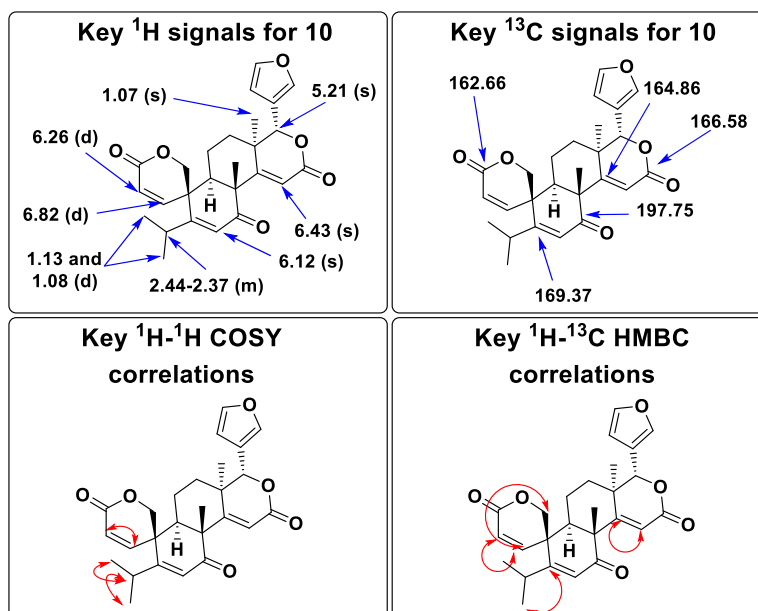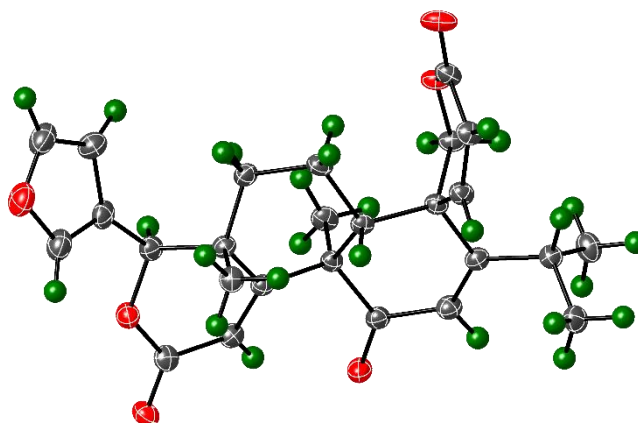

Crystallography

## SUPPORTING INFORMATION

**Experimental Protocol:** Intensity data were collected on a Bruker D8 Venture kappa diffractometer equipped with a Photon 100 CMOS detector. An I $\mu$ s microfocus Mo source ( $\lambda = 0.71073 \text{ \AA}$ ) coupled with a multi-layer mirror monochromator provided the incident beam. The sample was mounted on a 0.3 mm loop with the minimal amount of Paratone-N oil. Data was collected as a series of  $\varphi$  and/or  $\omega$  scans. Data was collected at 100 K using a cold stream of N<sub>2</sub>(g). The collection, cell refinement, and integration of intensity data was carried out with the APEX3 software.<sup>1</sup> A semi-empirical absorption correction was performed with SADABS.<sup>2</sup> The structure was phased with intrinsic methods using SHELXT<sup>3</sup> and refined with the full-matrix least-squares program SHELXL.<sup>4</sup>

CCDC: 2082413

- (1) Bruker (2016). APEX3. Bruker AXS, Inc., Madison, Wisconsin, USA.  
 (2) L. Krause, R. Herbst-Irmer, G. M. Sheldrick, D. Stalke, *J. Appl. Cryst.*, **2015**, *48*, 3–10.  
 (3) G. M. Sheldrick, *Acta Cryst.* **2015**, *A71*, 3–8.  
 (4) G. M. Sheldrick, *Acta Cryst.* **2015**, *C71*, 3–8.

**Table S4.** Crystal data and structure refinement for dd38ys.

Identification code dd38ys  
 Empirical formula C<sub>26</sub>H<sub>28</sub>O<sub>6</sub>  
 Formula weight 436.48  
 Temperature 100(2) K  
 Wavelength 1.54178 Å  
 Crystal system Trigonal  
 Space group P3<sub>2</sub>  
 Unit cell dimensions a = 29.7882(5) Å a = 90°.  
                                   b = 29.7882(5) Å b = 90°.  
                                   c = 6.30760(10) Å g = 120°.  
 Volume 4847.11(18) Å<sup>3</sup>  
 Z 9  
 Density (calculated) 1.346 Mg/m<sup>3</sup>  
 Absorption coefficient 0.776 mm<sup>-1</sup>  
 F(000) 2088  
 Crystal size 0.351 x 0.307 x 0.177 mm<sup>3</sup>  
 Theta range for data collection 2.967 to 74.502°.  
 Index ranges -37 ≤ h ≤ 37, -37 ≤ k ≤ 35, -7 ≤ l ≤ 7  
 Reflections collected 66384  
 Independent reflections 13091 [R(int) = 0.0358]  
 Completeness to theta = 67.679° 100.0 %  
 Absorption correction Semi-empirical from equivalents  
 Max. and min. transmission 0.7538 and 0.6657  
 Refinement method Full-matrix least-squares on F<sup>2</sup>  
 Data / restraints / parameters 13091 / 169 / 924  
 Goodness-of-fit on F<sup>2</sup> 1.044  
 Final R indices [ $I > 2\sigma(I)$ ] R1 = 0.0253, wR2 = 0.0665  
 R indices (all data) R1 = 0.0254, wR2 = 0.0665  
 Absolute structure parameter 0.01(3)  
 Extinction coefficient n/a  
 Largest diff. peak and hole 0.289 and -0.134 e.Å<sup>-3</sup>

**22** (6 mg, ca. 2%)

**<sup>1</sup>H NMR (DMSO-*d*<sub>6</sub>, 500 MHz):**  $\delta$  7.38 (d, *J* = 1.8 Hz, 1H), 7.37 (dd, *J* = 1.8, 1.8 Hz, 1H), 6.67 (s, 1H), 6.43 (dd, *J* = 10.0, 1.5 Hz, 1H), 6.30 (d, *J* = 1.8 Hz, 1H), 6.31 (d, *J* = 10.0 Hz, 1H), 6.15 (s, 1H), 5.03 (s, 1H), 4.68 (dd, *J* = 12.3, 1.5 Hz, 1H), 4.49 (d, *J* = 12.3 Hz, 1H), 2.46–2.42 (m, 2H), 1.82–1.65 (m, 3H), 1.49 (s, 3H), 1.42–1.36 (m, 1H), 1.36 (s, 3H), 1.17 (d, *J* = 6.8 Hz, 3H), 1.15 (d, *J* = 6.8 Hz, 3H).  
**<sup>13</sup>C NMR (CDCl<sub>3</sub>, 125 MHz):**  $\delta$  196.69, 167.51, 163.54, 161.81, 160.73, 148.35, 143.57, 141.73, 125.99, 123.75, 121.54, 119.23, 109.61, 81.95, 69.53, 48.03, 45.59, 41.36, 38.12, 31.05, 30.14, 28.44, 24.39, 24.31, 24.10, 18.33.

**HRMS(ESI):** *m/z* calc. for C<sub>26</sub>H<sub>29</sub>O<sub>6</sub> [M+H]<sup>+</sup>: 473.1964, found: 437.1963.

**mp:** >260° C.

**Opt. Rot.:** [ $\alpha$ ]<sub>D</sub><sup>25</sup> = -67 (c = 0.10, acetone/chloroform).

## SUPPORTING INFORMATION

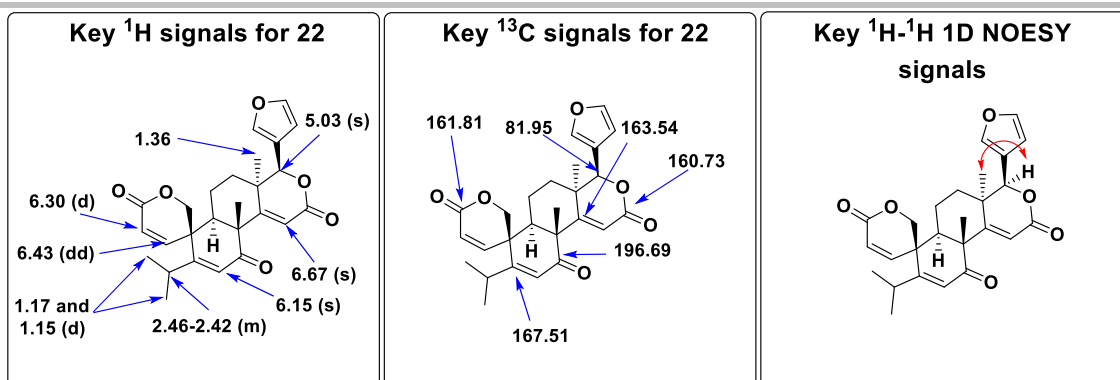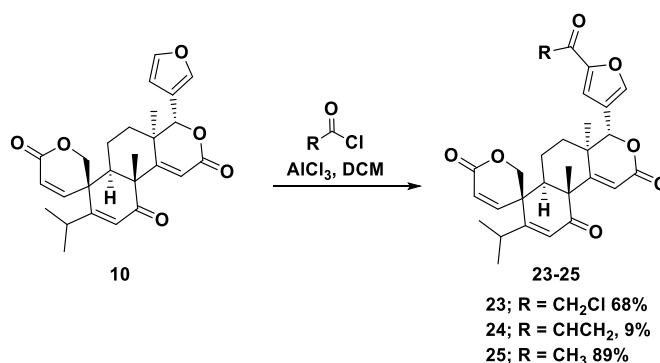

**Procedure:**  $\text{AlCl}_3$  (40 mg, 0.30 mmol) was added at  $0^\circ\text{C}$  to a cooled solution of **10** (28 mg, 0.065 mmol), in dichloromethane (1.3 mL). The resulting mixture was stirred 30 minutes, before the suitable acyl chloride (0.079 mmol) was added to the solution. The resulting solution was allowed to stir at  $30^\circ\text{C}$  for 12 h. Water was added, and the aqueous layer was extracted three times with dichloromethane. The combined organic layers were washed with 2M sodium hydroxide and brine. After drying over  $\text{Na}_2\text{SO}_4$ , the solution was concentrated by distillation at reduced pressure, and the residue was purified by flash chromatography on silica gel (hexane-ethyl acetate 6:4), giving **23-25** (4-89%) as white solids.

**23** (23 mg, 68%)

**$^1\text{H}$  NMR (DMSO- $d_6$ , 500 MHz):**  $\delta$  8.22 (s, 1H), 7.74 (s, 1H), 6.87 (d,  $J = 9.9$  Hz, 1H), 6.50 (s, 1H), 6.32 (d,  $J = 9.9$  Hz, 1H), 6.19 (s, 1H), 5.37 (s, 1H), 5.00 (s, 2H), 4.89 (d,  $J = 12.4$ , 1H), 4.69 (d,  $J = 12.4$  Hz, 1H), 2.73 (dd,  $J = 12.6, 5.4$  Hz, 1H), 2.50 – 2.43 (m, 1H), 1.99 – 1.89 (m, 1H), 1.85 - 1.79 (m, 1H), 1.77 - 1.69 (m, 1H), 1.51 (s, 3H), 1.36 – 1.31 (m, 1H), 1.18 (d,  $J = 6.7$  Hz, 3H), 1.14 (d,  $J = 6.7$  Hz, 3H), 1.12 (s, 3H).

**$^{13}\text{C}$  NMR (DMSO- $d_6$ , 125 MHz):**  $\delta$  197.63, 180.67, 169.34, 166.30, 164.44, 162.67, 149.98, 149.92, 147.52, 124.88, 123.32, 123.05, 120.31, 118.51, 80.19, 69.79, 48.35, 46.24, 45.50, 40.25, 37.59, 30.82, 27.64, 25.27, 24.13, 23.94, 20.88, 17.46.

**HRMS(ESI):**  $m/z$  calc. for  $\text{C}_{28}\text{H}_{30}\text{O}_7\text{Cl}$   $[\text{M}+\text{H}]^+$ : 513.1693, found: 513.1680.

**mp:** decomposes upon heating above  $140^\circ\text{C}$ .

**Opt. Rot.:**  $[\alpha]_{\text{D}}^{25} = -107$  ( $c = 0.13$ , acetone).

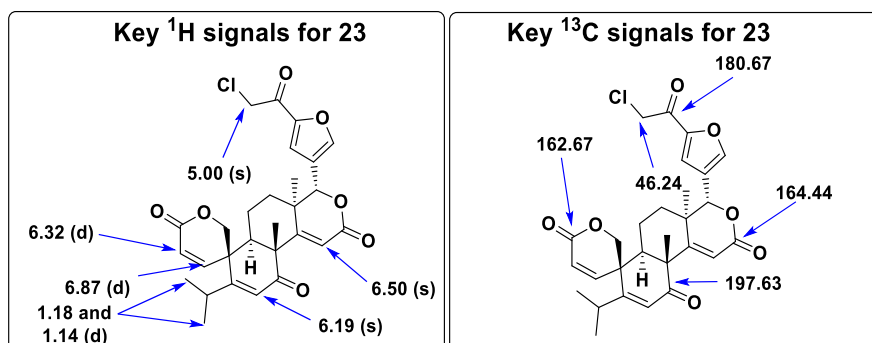

**24** (2.8 mg, ca. 9%)



## SUPPORTING INFORMATION

**<sup>1</sup>H NMR (CDCl<sub>3</sub>, 500 MHz):** δ 7.69 (s, 1H), 7.26 (s, 1H), 7.05 (dd, *J* = 17.1, 10.6 Hz, 1H), 6.72 (s, 1H), 6.57 (dd, *J* = 17.1, 1.6 Hz, 1H), 6.40 (dd, *J* = 9.9, 1.6 Hz, 1H), 6.31 (d, *J* = 9.9 Hz, 1H), 6.17 (s, 1H), 5.92 (dd, *J* = 10.6, 1.6 Hz, 1H), 5.09 (s, 1H), 4.78 (dd, *J* = 12.4, 1.6 Hz, 1H), 4.54 (d, *J* = 12.4 Hz, 1H), 2.57 – 2.40 (m, 2H), 2.09 – 1.98 (m, 1H), 1.94 – 1.84 (m, 1H), 1.76 – 1.69 (m, 1H), 1.54 – 1.49 (m, 1H), 1.26 (s, 3H), 1.18 (d, *J* = 6.7 Hz, 3H), 1.16 (d, *J* = 6.7 Hz, 3H), 1.12 (s, 3H).

**<sup>13</sup>C NMR (CDCl<sub>3</sub>, 125 MHz):** δ 196.28, 178.09, 167.27, 164.44, 164.04, 161.68, 153.11, 148.11, 145.05, 130.93, 130.31, 126.00, 123.79, 122.90, 119.17, 117.27, 81.14, 69.25, 48.13, 45.63, 40.15, 37.82, 31.03, 27.86, 25.50, 24.35, 24.14, 20.96, 17.37.

**HRMS(ESI):** *m/z* calc. for C<sub>29</sub>H<sub>31</sub>O<sub>7</sub> [M+H]<sup>+</sup>: 491.2070, found: 491.2072.

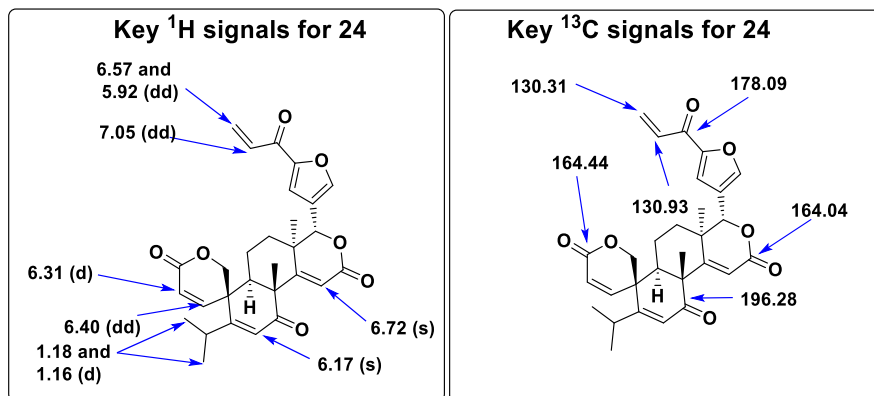

**25** (28 mg, 89%)

**<sup>1</sup>H NMR (CDCl<sub>3</sub>, 500 MHz):** δ 7.63 (s, 1H), 7.17 (s, 1H), 6.71 (s, 1H), 6.40 (dd, *J* = 9.9, 1.6 Hz, 1H), 6.31 (d, *J* = 9.9 Hz, 1H), 6.17 (s, 1H), 5.07 (s, 1H), 4.77 (dd, *J* = 12.4, 1.6 Hz, 1H), 4.54 (d, *J* = 12.4 Hz, 1H), 2.56 – 2.42 (m, 2H), 2.48 (s, 3H), 2.12 – 2.00 (m, 1H), 1.83 – 1.85 (s, 1H), 1.75 – 1.69 (m, 1H), 1.55 – 1.49 (m, 1H), 1.54 (s, 3H), 1.18 (d, *J* = 6.7 Hz, 3H), 1.17 (d, *J* = 6.7 Hz, 3H), 1.12 (s, 3H).

**<sup>13</sup>C NMR (CDCl<sub>3</sub>, 125 MHz):** δ 196.29, 186.79, 167.25, 164.47, 164.07, 161.69, 152.99, 148.13, 144.61, 126.00, 123.77, 122.68, 119.15, 116.30, 81.14, 69.24, 48.12, 45.64, 40.13, 37.80, 31.03, 27.84, 26.05, 25.50, 24.35, 24.14, 20.94, 17.36.

**HRMS(ESI):** *m/z* calc. for C<sub>28</sub>H<sub>31</sub>O<sub>7</sub> [M+H]<sup>+</sup>: 479.2070, found: 479.2089.

**mp:** >260° C.

**Opt. Rot.:** [α]<sub>D</sub><sup>25</sup> = - 75 (c = 0.05, acetone).

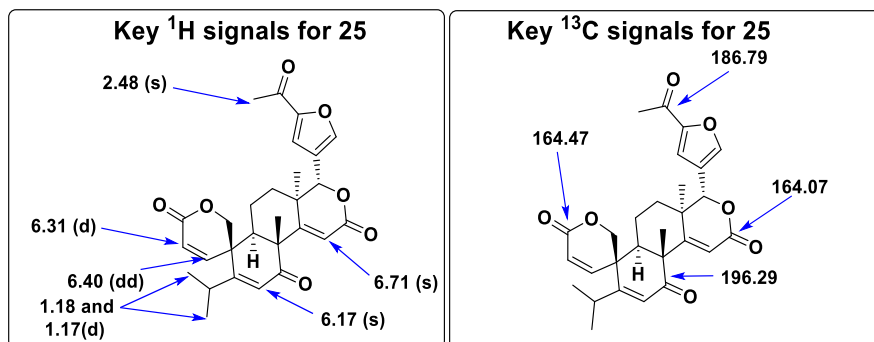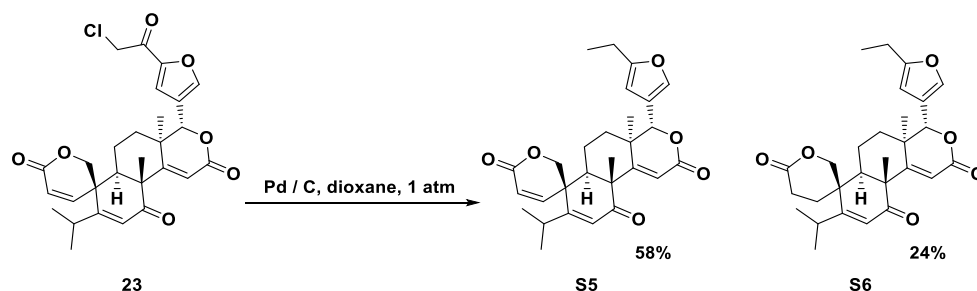

**Procedure:** A suspension of **23** (80 mg, 0.16 mmol) in dioxane (15 mL) was hydrogenated in the presence of 10% Pd/C at 1 atm for 72 h. The catalyst was removed by filtration over celite, and the filtrate was evaporated under reduced pressure to obtain a crude residue that was purified by silica gel flash chromatography (hexane-ethyl acetate 6:4) to provide **S5** (20 mg, 58%) and **S6** (18 mg, 24%) as white solids.

## SUPPORTING INFORMATION

**S5** (20 mg, 58%)

**<sup>1</sup>H NMR (CDCl<sub>3</sub>, 125 MHz):** δ 7.32 (s, 1H), 6.69 (s, 1H), 6.41 (dd, *J* = 9.9, 1.4 Hz, 1H), 6.29 (d, *J* = 9.9 Hz, 1H), 6.16 (s, 1H), 6.00 (s, 1H), 4.97 (s, 1H), 4.77 (dd, *J* = 12.4, 1.4 Hz, 1H), 4.53 (d, *J* = 12.4 Hz, 1H), 2.62 (q, *J* = 7.6 Hz, 2H), 2.52 (dd, *J* = 12.9, 5.8 Hz, 1H), 2.46 (hept, *J* = 6.7 Hz, 1H), 2.05 – 1.96 (m, 1H), 1.92 – 1.81 (m, 1H), 1.65 (ddd, *J* = 15.8, 9.7, 6.7 Hz, 1H), 1.54 – 1.52 (m, 1H), 1.52 (s, 3H), 1.21 (t, *J* = 7.6 Hz, 3H), 1.18 (d, *J* = 6.7 Hz, 3H), 1.16 (d, *J* = 6.7 Hz, 3H), 1.14 (s, 3H).

**<sup>13</sup>C NMR (CDCl<sub>3</sub>, 125 MHz):** δ 196.60, 167.11, 164.89, 164.87, 161.81, 158.42, 148.33, 139.47, 126.10, 123.61, 120.32, 118.93, 104.44, 82.13, 69.35, 48.06, 45.64, 40.18, 37.99, 31.01, 27.74, 25.51, 24.34, 24.13, 21.33, 21.00, 17.45, 11.98.

**HRMS(ESI):** *m/z* calc. for C<sub>28</sub>H<sub>33</sub>O<sub>6</sub> [M+H]<sup>+</sup>: 465.2277, found: 465.2267.

**mp:** >260° C.

**Opt. Rot.:** [α]<sub>D</sub><sup>25</sup> = - 35 (c = 0.05, acetone/chloroform).

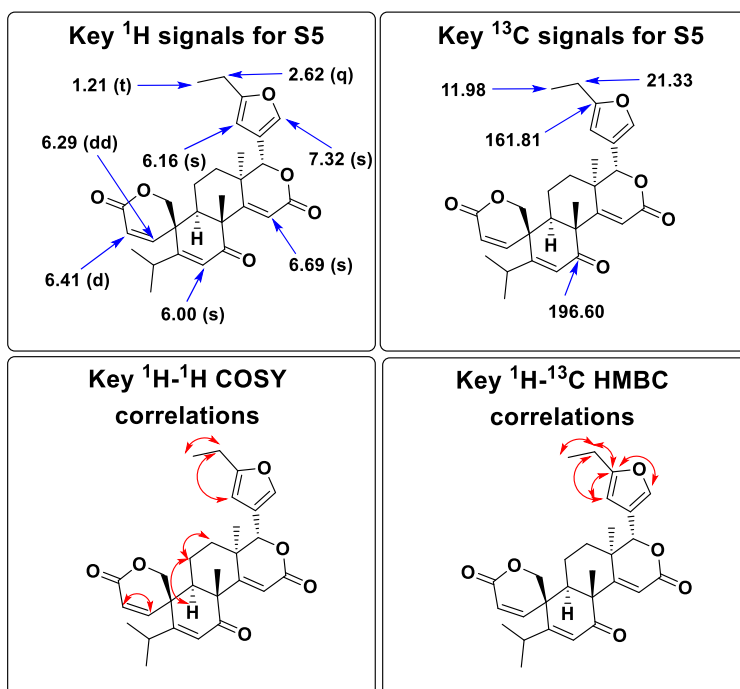

**S6** (18 mg, 24%)

**<sup>1</sup>H NMR (CDCl<sub>3</sub>, 125 MHz):** δ 7.35 (s, 1H), 6.55 (s, 1H), 6.09 (s, 1H), 6.04 (s, 1H), 5.00 (s, 1H), 4.62 (d, *J* = 12.4 Hz, 1H), 4.40 (d, *J* = 12.4 Hz, 1H), 2.73 – 2.67 (m, 2H), 2.65 (q, *J* = 7.6 Hz, 2H), 2.55 (hept, *J* = 6.7 Hz, 1H), 2.44 (dd, *J* = 12.3, 4.8 Hz, 1H), 2.31 (ddd, *J* = 14.5, 14.5, 6.8 Hz, 1H), 2.10 – 1.84 (m, 3H), 1.79 – 1.73 (m, 1H), 1.57 – 1.53 (m, 1H), 1.47 (s, 3H), 1.27 (d, *J* = 6.7 Hz, 3H), 1.26 (s, *J* = 6.7 Hz, 3H), 1.23 (t, *J* = 7.6 Hz, 3H), 1.15 (s, 3H).

**<sup>13</sup>C NMR (CDCl<sub>3</sub>, 125 MHz):** δ 196.66, 171.70, 171.26, 164.82, 164.62, 158.39, 139.45, 124.15, 120.46, 119.93, 104.50, 81.75, 69.15, 49.28, 44.92, 43.09, 37.63, 30.46, 30.43, 30.04, 29.38, 25.02, 24.99, 24.45, 21.91, 21.34, 18.04, 11.99.

**HRMS(ESI):** *m/z* calc. for C<sub>28</sub>H<sub>35</sub>O<sub>6</sub> [M+H]<sup>+</sup>: 467.2334, found: 467.2419.

**mp:** >260° C.

**Opt. Rot.:** [α]<sub>D</sub><sup>25</sup> = - 19 (c = 0.05, acetone/chloroform).

## SUPPORTING INFORMATION

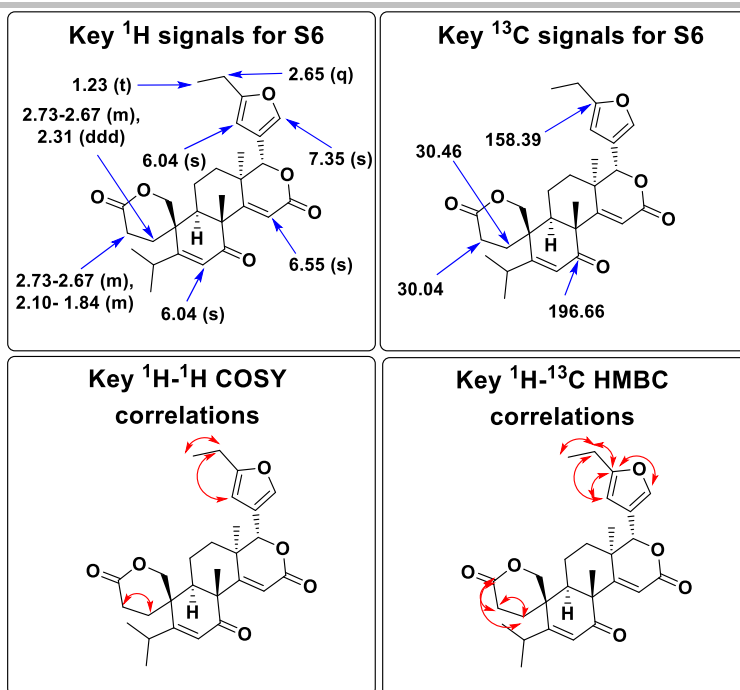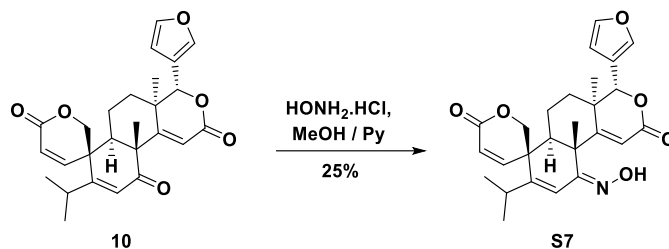

**Procedure:** Hydroxylamine hydrochloride (183 mg, 2.64 mmol) was added to a solution of **10** (150 mg, 0.33 mmol) in methanol (7 mL) and pyridine (2.5 mL), and the resulting mixture was heated under reflux for 48 h. The reaction was cooled to room temperature, acidified to pH 2 with 2 M hydrochloric acid, and extracted three times with dichloromethane. The combined organic layers were washed with brine, dried over  $\text{Na}_2\text{SO}_4$ , and concentrated by distillation under reduced pressure to yield a crude residue that was purified by silica gel flash chromatography (hexane–ethyl acetate 1:1) to provide **S7** (37 mg, 25%) as a white solid.

**Note:** Compound **S7** is known,<sup>[2]</sup> however **S7** has never been fully characterized. The hydroxy group on the C=N double bond of **S7** adopts the *Z* configuration.

**$^1\text{H}$  NMR (DMSO-*d*<sub>6</sub>, 500 MHz):**  $\delta$  11.20 (s, 1H), 7.77 (d,  $J = 1.8$  Hz, 1H), 7.69 (s, 1H), 6.84 (s, 1H), 6.69 (d,  $J = 9.9$  Hz, 1H), 6.57 (d,  $J = 1.8$  Hz, 1H), 6.22 (s, 1H), 6.19 (d,  $J = 9.9$  Hz, 1H), 5.21 (s, 1H), 4.70 (d,  $J = 12.2$  Hz, 1H), 4.57 (d,  $J = 12.2$  Hz, 1H), 2.36 (t,  $J = 6.8$  Hz, 1H), 2.22 (dd,  $J = 12.2, 3.6$  Hz, 1H), 1.85 – 1.80 (m, 1H), 1.65 – 1.54 (m, 2H), 1.41 (s, 3H), 1.27 – 1.15 (m, 1H), 1.11 (d,  $J = 6.8$  Hz, 3H), 1.07 (d,  $J = 6.8$  Hz, 3H), 1.06 (s, 3H).

**$^{13}\text{C}$  NMR (DMSO-*d*<sub>6</sub>, 125 MHz):**  $\delta$  167.46, 164.79, 162.92, 154.97, 154.61, 151.77, 143.79, 142.26, 122.56, 120.78, 120.70, 113.69, 110.91, 80.33, 69.75, 45.37, 43.57, 43.00, 37.82, 30.99, 30.25, 24.96, 24.69, 24.46, 22.73, 19.14.

**HRMS(ESI):**  $m/z$  calc. for  $\text{C}_{26}\text{H}_{30}\text{NO}_6$  [ $\text{M}+\text{H}$ ]<sup>+</sup>: 452.2073, found: 452.2081.

**mp:** 212–213° C.

**Opt. Rot.:**  $[\alpha]_{\text{D}}^{25} = -54$  ( $c = 0.09$ , acetone).

## SUPPORTING INFORMATION

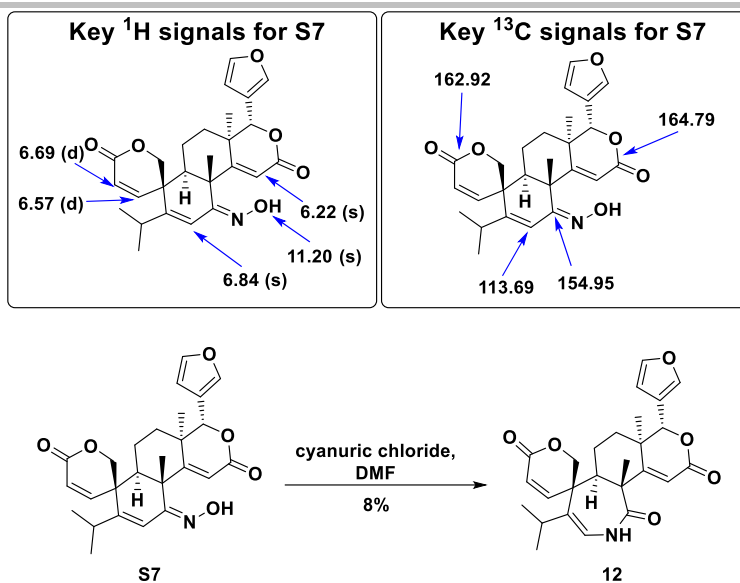

**Procedure:** Cyanuric chloride (59 mg, 0.319 mmol) was added to a dry oven flask and dissolved in DMF (0.8 mL). The resulting solution was stirred until the solution turns yellow, then, **S7** (36 mg, 0.079 mmol) in DMF (0.9 mL) was added. The reaction mixture was stirred at 60° C for 48 h. The reaction was cooled to room temperature, then, water and dichloromethane were added and the aqueous layer was extracted three times with dichloromethane. The combined organic layers were washed with brine and dried over  $\text{Na}_2\text{SO}_4$ . The solvent was concentrated by distillation under reduced pressure to obtain a crude residue of **12** that was purified by silica gel flash chromatography (hexane-ethyl acetate 3:7) to provide **12** (3 mg, 8%) as a white solid.

**$^1\text{H}$  NMR (DMSO- $d_6$ , 500 MHz):**  $\delta$  8.12 (d,  $J = 1.9$  Hz, 1H), 7.78 (d,  $J = 1.8$  Hz, 1H), 7.71 (dd,  $J = 1.8, 1.8$  Hz, 1H), 6.85 (d,  $J = 9.9$  Hz, 1H), 6.58 (d,  $J = 1.8$  Hz, 1H), 6.24 (s, 1H), 6.17 (d,  $J = 9.9$  Hz, 1H), 5.84 (d,  $J = 1.9$  Hz, 1H), 5.21 (s, 1H), 4.76 (d,  $J = 12.7$  Hz, 1H), 4.63 (d,  $J = 12.7$  Hz, 1H), 2.65 (dd,  $J = 12.3, 3.0$  Hz, 1H), 2.49 (t,  $J = 6.7$  Hz, 1H), 1.89 – 1.75 (m, 1H), 1.66 – 1.57 (m, 1H), 1.51 (s, 3H), 1.31 – 1.21 (m, 2H), 1.18 (s, 3H), 1.14 (d,  $J = 6.7$  Hz, 3H), 1.05 (d,  $J = 6.7$  Hz, 3H).

**$^{13}\text{C}$  NMR (DMSO- $d_6$ , 125 MHz):**  $\delta$  169.75, 166.00, 164.42, 162.27, 159.58, 151.31, 143.86, 142.34, 124.51, 121.11, 120.52, 117.56, 110.90, 80.19, 69.66, 58.04, 49.62, 48.57, 38.47, 31.61, 31.43, 24.96, 24.56, 23.92, 23.00, 22.75.

**HRMS(ESI):**  $m/z$  calc. for  $\text{C}_{26}\text{H}_{30}\text{NO}_6$   $[\text{M}+\text{H}]^+$ : 452.2073, found: 452.2070.

**mp:** >260° C.

**Opt. Rot.:**  $[\alpha]_{\text{D}}^{25} = -155$  ( $c = 0.03$ , acetone/chloroform).

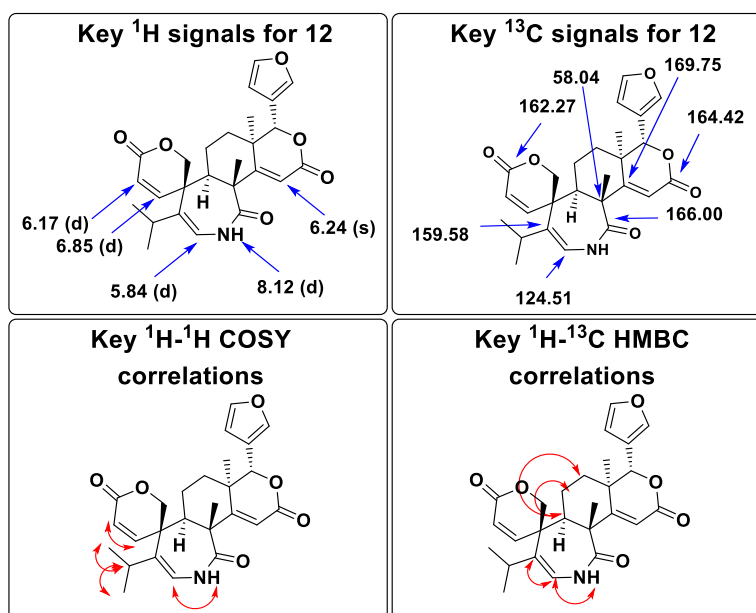

## SUPPORTING INFORMATION

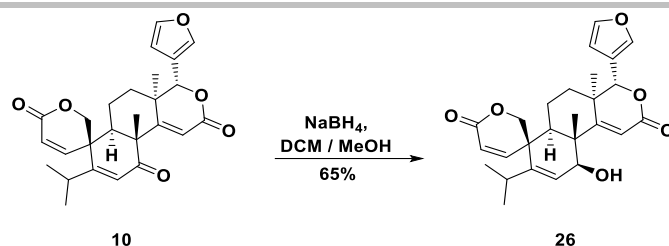

**Procedure:** A solution of  $\text{NaBH}_4$  (23 mg, 0.60 mmol) in anhydrous methanol (1 mL) was added to a solution of **10** (48 mg, 0.11 mmol) in dichloromethane (2 mL) at  $-20^\circ\text{C}$  and the resulting mixture was stirred at  $-20^\circ\text{C}$ . After 15 minutes, the reaction was quenched with a 2 M hydrochloric acid solution and extracted three times with dichloromethane. The organic layers were dried over  $\text{Na}_2\text{SO}_4$  and concentrated by distillation under reduced pressure to obtain a crude residue that was purified by silica gel flash chromatography (hexane-ethyl acetate 4:6) to provide an amorphous solid that was crystallized with chloroform and hexane to obtain pure **26** (31 mg, 65%).

**$^1\text{H NMR}$  ( $\text{CDCl}_3$ , 500 MHz):**  $\delta$  7.48 (d,  $J = 1.8$  Hz, 1H), 7.42 (dd,  $J = 1.8, 1.8$  Hz, 1H), 6.75 (s, 1H), 6.41 (d,  $J = 1.8$  Hz, 1H), 6.25 (dd,  $J = 9.9, 1.7$  Hz, 1H), 6.15 (d,  $J = 9.9$  Hz, 1H), 5.64 (d,  $J = 1.9$  Hz, 1H), 5.04 (s, 1H), 4.70 (dd,  $J = 12.5, 1.7$  Hz, 1H), 4.49 (d,  $J = 12.5$  Hz, 1H), 4.24 (br s, 1H), 2.26 (hept,  $J = 6.8$  Hz, 1H), 2.25 (t, 6.7 Hz, 1H), 1.98 – 1.86 (m, 2H), 1.85 – 1.74 (m, 1H), 1.74 – 1.64 (m, 1H), 1.48 (ddd,  $J = 14.6, 10.5, 5.1$  Hz, 1H), 1.26 (s, 3H), 1.16 (s, 3H), 1.11 (d, 6.7 Hz, 3H), 1.08 (d, 6.7 Hz, 3H).

**$^{13}\text{C NMR}$  ( $\text{CDCl}_3$ , 125 MHz):**  $\delta$  173.33, 165.59, 162.50, 150.79, 145.91, 143.08, 141.35, 128.18, 122.44, 119.97, 117.02, 110.02, 81.69, 74.20, 69.34, 44.88, 42.67, 39.49, 37.75, 29.37, 28.57, 25.21, 25.15, 21.22, 17.65, 17.36.

**HRMS(ESI):**  $m/z$  calc. for  $\text{C}_{26}\text{H}_{31}\text{O}_6$   $[\text{M}+\text{H}]^+$ : 439.2121, found: 439.2131.

**mp:**  $>260^\circ\text{C}$ .

**Opt. Rot.:**  $[\alpha]_{\text{D}}^{25} = -162$  ( $c = 0.05$ , acetone).

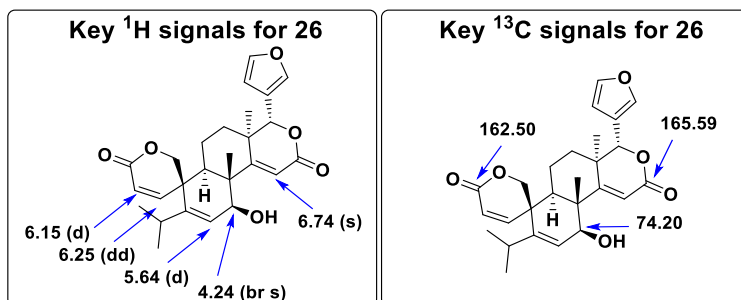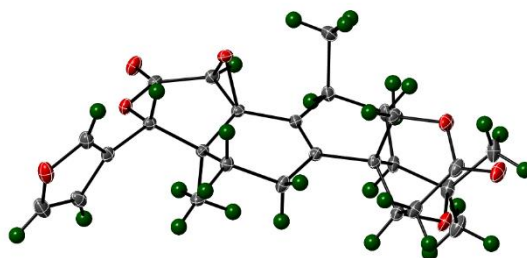

### Crystallography

**Experimental Protocol:** Intensity data were collected on a Bruker D8 Venture kappa diffractometer equipped with a Photon 100 CMOS detector. An  $\mu\text{s}$  microfocus Mo source ( $\lambda = 0.71073 \text{ \AA}$ ) coupled with a multi-layer mirror monochromator provided the incident beam. The sample was mounted on a 0.3 mm loop with the minimal amount of Paratone-N oil. Data was collected as a series of  $\varphi$  and/or  $\omega$  scans. Data was collected at 100 K using a cold stream of  $\text{N}_2(\text{g})$ . The collection, cell refinement, and integration of intensity data was carried out with the APEX3 software.<sup>1</sup> A semi-empirical absorption correction was performed with SADABS.<sup>2</sup> The structure was phased with intrinsic methods using SHELXT<sup>3</sup> and refined with the full-matrix least-squares program SHELXL.<sup>4</sup>

## SUPPORTING INFORMATION

CCDC: 2082415

- (1) Bruker (2016). APEX3. Bruker AXS, Inc., Madison, Wisconsin, USA.  
 (2) L. Krause, R. Herbst-Irmer, G. M. Sheldrick, D. Stalke, *J. Appl. Cryst.*, **2015**, *48*, 3–10.  
 (3) G. M. Sheldrick, *Acta Cryst.* **2015**, *A71*, 3–8.  
 (4) G. M. Sheldrick, *Acta Cryst.* **2015**, *C71*, 3–8.

**Table S5.** Crystal data and structure refinement for ed19as.

Identification code ed19as  
 Empirical formula C<sub>26</sub> H<sub>30</sub> O<sub>7</sub>  
 Formula weight 454.50  
 Temperature 100(2) K  
 Wavelength 1.54178 Å  
 Crystal system Monoclinic  
 Space group P2<sub>1</sub>  
 Unit cell dimensions a = 9.6959(7) Å a = 90°.  
 b = 11.4093(8) Å b = 98.0088(9)°.  
 c = 10.5779(7) Å c = 90°.  
 Volume 1158.75(14) Å<sup>3</sup>  
 Z 2  
 Density (calculated) 1.303 Mg/m<sup>3</sup>  
 Absorption coefficient 0.774 mm<sup>-1</sup>  
 F(000) 484  
 Crystal size 0.317 x 0.228 x 0.175 mm<sup>3</sup>  
 Theta range for data collection 4.221 to 74.392°.  
 Index ranges -11 ≤ h ≤ 12, -14 ≤ k ≤ 13, -13 ≤ l ≤ 13  
 Reflections collected 29849  
 Independent reflections 4686 [R(int) = 0.0275]  
 Completeness to theta = 67.679° 100.0 %  
 Absorption correction Semi-empirical from equivalents  
 Max. and min. transmission 0.7538 and 0.7120  
 Refinement method Full-matrix least-squares on F<sup>2</sup>  
 Data / restraints / parameters 4686 / 1 / 303  
 Goodness-of-fit on F<sup>2</sup> 1.050  
 Final R indices [I > 2σ(I)] R<sub>1</sub> = 0.0250, wR<sub>2</sub> = 0.0674  
 R indices (all data) R<sub>1</sub> = 0.0250, wR<sub>2</sub> = 0.0674  
 Absolute structure parameter 0.02(3)  
 Extinction coefficient 0.0038(6)  
 Largest diff. peak and hole 0.217 and -0.130 e.Å<sup>-3</sup>

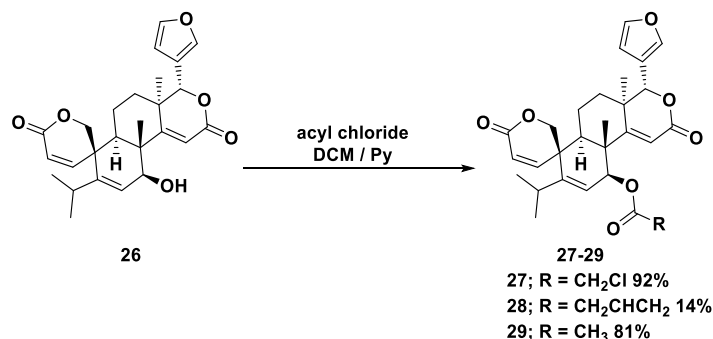

**Procedure:** Pyridine (60 μL, 0.7 mmol) and the suitable acyl chloride (0.8 mmol) were added to a solution of **26** (300 mg, 0.68 mmol) in dichloromethane (10 mL), and the resulting solution was stirred at 30° C for 16 h. Water and dichloromethane were added to the reaction mixture and the aqueous layer was extracted three times with dichloromethane. The combined organic layers were washed with brine and dried over Na<sub>2</sub>SO<sub>4</sub>. The solvent was concentrated by distillation under reduced pressure and the obtained crude residue was purified by silica gel flash chromatography (hexane-ethyl acetate 1:1) to provide **27-29** (14-92%) as white solids.

**27** (321 mg, 92%)

## SUPPORTING INFORMATION

**$^1\text{H}$  NMR (CDCl<sub>3</sub>, 500 MHz):**  $\delta$  7.41 (d,  $J$  = 1.8 Hz, 1H), 7.35 (dd,  $J$  = 1.8, 1.8 Hz, 1H), 6.35 (d,  $J$  = 1.8 Hz, 1H), 6.19 (dd,  $J$  = 9.9, 1.6 Hz, 1H), 6.13 (d,  $J$  = 9.9 Hz, 1H), 6.12 (s, 1H), 5.49 (d,  $J$  = 1.8 Hz, 1H), 5.37 (d,  $J$  = 1.8 Hz, 1H), 4.96 (s, 1H), 4.64 (dd,  $J$  = 12.6, 1.6 Hz, 1H), 4.45 (d,  $J$  = 12.6 Hz, 1H), 4.15 (s, 2H), 2.23 (hept,  $J$  = 6.8 Hz, 1H), 1.92 (dd,  $J$  = 11.0, 5.1 Hz, 1H), 1.78 – 1.66 (m, 3H), 1.43 – 1.35 (m, 1H), 1.28 (s, 3H), 1.15 (s, 3H), 1.04 (d,  $J$  = 6.8 Hz, 3H), 1.02 (d,  $J$  = 6.8 Hz, 3H).

**$^{13}\text{C}$  NMR (CDCl<sub>3</sub>, 125 MHz):**  $\delta$  170.14, 166.89, 164.45, 162.27, 150.21, 148.34, 143.17, 141.39, 123.59, 122.96, 119.78, 118.11, 110.03, 81.35, 77.63, 68.99, 44.75, 41.72, 40.97, 40.93, 37.82, 30.34, 29.57, 25.07, 24.96, 22.75, 18.18, 17.44.

**HRMS(ESI):**  $m/z$  calc. for C<sub>28</sub>H<sub>32</sub>O<sub>7</sub>Cl [M+H]<sup>+</sup>: 515.1837, found: 515.1857.

**Opt. Rot.:** [ $\alpha$ ]<sub>D</sub><sup>25</sup> = -108 (c = 0.11, acetone).

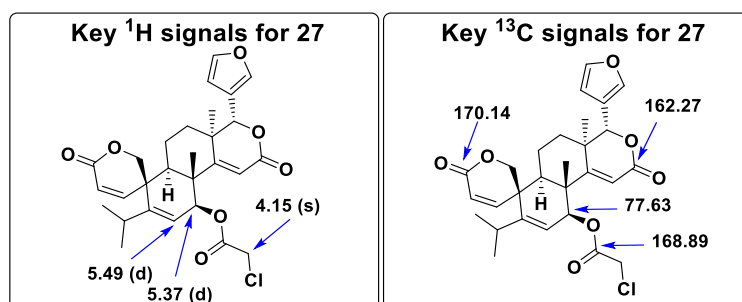

**28** (50 mg, 14%)

**$^1\text{H}$  NMR (CDCl<sub>3</sub>, 500 MHz):**  $\delta$  7.49 (d,  $J$  = 1.8 Hz, 1H), 7.44 (dd,  $J$  = 1.8 Hz, 1H), 6.54 (dt,  $J$  = 17.3, 0.9 Hz, 1H), 6.44 (d,  $J$  = 1.8 Hz, 1H), 6.29 (dd,  $J$  = 17.3, 10.5 Hz, 1H), 6.25 (dd,  $J$  = 9.9, 1.7 Hz, 1H), 6.21 (d,  $J$  = 9.9 Hz, 1H), 6.15 (s, 1H), 6.02 (dt,  $J$  = 10.5, 0.9 Hz, 1H), 5.59 (d,  $J$  = 1.8 Hz, 1H), 5.50 (d,  $J$  = 1.8 Hz, 1H), 5.04 (s, 1H), 4.74 (dd,  $J$  = 12.5, 1.7 Hz, 1H), 4.55 (d,  $J$  = 12.5 Hz, 1H), 2.31 (hept,  $J$  = 6.8 Hz, 1H), 2.04 (t,  $J$  = 8.0 Hz, 1H), 1.86 – 1.74 (m, 3H), 1.52 – 1.46 (m, 1H), 1.38 (s, 3H), 1.24 (s, 3H), 1.12 (d,  $J$  = 6.8 Hz, 3H), 1.10 (d,  $J$  = 6.8 Hz, 3H).

**$^{13}\text{C}$  NMR (CDCl<sub>3</sub>, 125 MHz):**  $\delta$  170.65, 165.46, 164.49, 162.39, 150.51, 147.37, 143.11, 141.36, 132.61, 127.79, 124.54, 122.78, 119.89, 117.78, 110.05, 81.36, 75.72, 69.11, 44.78, 41.60, 40.83, 37.77, 30.12, 29.52, 25.08, 24.99, 22.52, 18.06, 17.77.

**HRMS(ESI):**  $m/z$  calc. for C<sub>29</sub>H<sub>33</sub>O<sub>7</sub> [M+H]<sup>+</sup>: 493.2226, found: 493.2214.

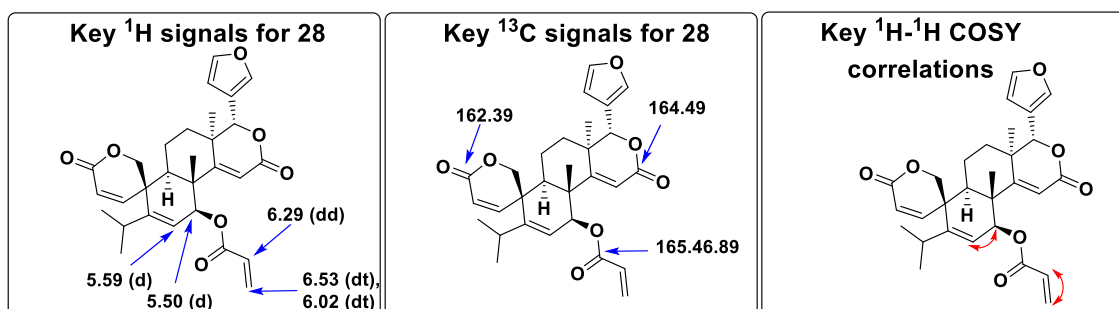

**29** (260 mg, 81%)

**$^1\text{H}$  NMR (CDCl<sub>3</sub>, 500 MHz):**  $\delta$  7.50 (dd,  $J$  = 1.8, 0.9 Hz, 1H), 7.44 (dd,  $J$  = 1.8, 1.8 Hz, 1H), 6.44 (dd,  $J$  = 1.8, 0.9 Hz, 1H), 6.28 (dd,  $J$  = 9.9, 1.7 Hz, 1H), 6.20 (d,  $J$  = 9.9 Hz, 1H), 6.19 (s, 1H), 5.56 (d,  $J$  = 1.8 Hz, 1H), 5.40 (d,  $J$  = 1.8 Hz, 1H), 5.05 (s, 1H), 4.72 (dd,  $J$  = 12.4, 1.7 Hz, 1H), 4.54 (d,  $J$  = 12.4 Hz, 1H), 2.29 (hept,  $J$  = 6.8 Hz, 1H), 2.24 (s, 3H), 2.00 (dd,  $J$  = 10.7, 5.0 Hz, 1H), 1.84 – 1.73 (m, 3H), 1.53 – 1.42 (m, 1H), 1.33 (s, 3H), 1.23 (s, 3H), 1.12 (d,  $J$  = 6.8 Hz, 3H), 1.10 (d,  $J$  = 6.8 Hz, 3H).

**$^{13}\text{C}$  NMR (CDCl<sub>3</sub>, 125 MHz):**  $\delta$  170.49 (2C), 164.63, 162.41, 150.56, 147.27, 143.13, 141.37, 124.72, 122.77, 119.86, 117.83, 110.05, 81.38, 75.52, 69.08, 44.76, 41.53, 41.05, 37.76, 30.41, 29.47, 25.10, 24.98, 22.74, 21.31, 18.20, 17.43.

**HRMS(ESI):**  $m/z$  calc. for C<sub>28</sub>H<sub>33</sub>O<sub>7</sub> [M+H]<sup>+</sup>: 481.2228, found: 481.2226.

## SUPPORTING INFORMATION

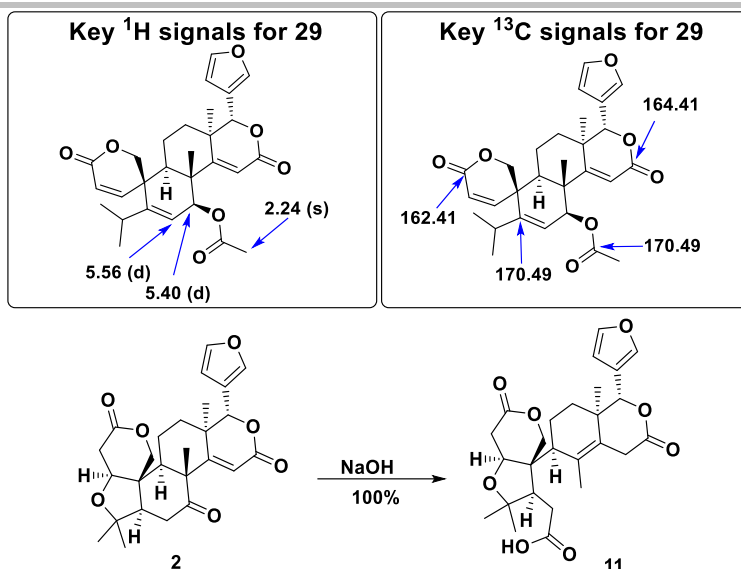

**Procedure:** A suspension of **2** (50 mg, 0.11 mmol) in 2 M sodium hydroxide (1.25 mL), was heated at 110° C for 2 h. The reaction was cooled to room temperature and slowly acidified with concentrated hydrochloric acid to pH 2. The aqueous layer was extracted with dichloromethane, dried over  $\text{Na}_2\text{SO}_4$ , and concentrated by distillation under reduced pressure to yield pure **11** (52 mg, quantitative yield) as a yellow solid.

**$^1\text{H}$  NMR ( $\text{CDCl}_3$ , 500 MHz):**  $\delta$  7.35 (d,  $J = 1.8$  Hz, 1H), 7.31 (dd,  $J = 1.9, 1.8$  Hz, 1H), 6.31 (d,  $J = 1.9$  Hz, 1H), 5.08 (s, 1H), 4.48 (t,  $J = 3.9$  Hz, 1H), 4.21 (d,  $J = 12.2$  Hz, 1H), 4.02 (d,  $J = 12.2$  Hz, 1H), 3.38 (d,  $J = 21.9$ , 1H), 3.32 (d,  $J = 21.9$ , 1H), 2.74 – 2.66 (m, 3H), 2.58 (dd,  $J = 16.9, 12.2$  Hz, 1H), 2.43 (dd,  $J = 16.9, 2.3$  Hz, 1H), 2.25 (br s, 1H), 1.75 (s, 3H), 1.74 – 1.70 (m, 2H), 1.29 – 1.16 (m, 2H), 1.18 (s, 3H), 1.13 (s, 3H), 0.99 (s, 3H). (31 non-exchangeable protons)

**$^{13}\text{C}$  NMR ( $\text{CDCl}_3$ , 125 MHz):**  $\delta$  175.84, 170.57, 170.32, 143.09, 141.26, 133.65, 126.70, 120.39, 109.75, 82.43, 81.21, 75.39, 69.15, 52.28, 48.35, 43.06, 38.00, 34.73, 33.80, 31.78, 29.87, 28.97, 24.99, 22.00, 20.08, 18.11.

**HRMS(ESI):**  $m/z$  calc. for  $\text{C}_{26}\text{H}_{33}\text{O}_8$   $[\text{M}+\text{H}]^+$ : 473.2175, found: 473.2182.

**mp:** 126–128° C.

**Opt. Rot.:**  $[\alpha]_{\text{D}}^{25} = -114$  ( $c = 0.16$ , acetone).

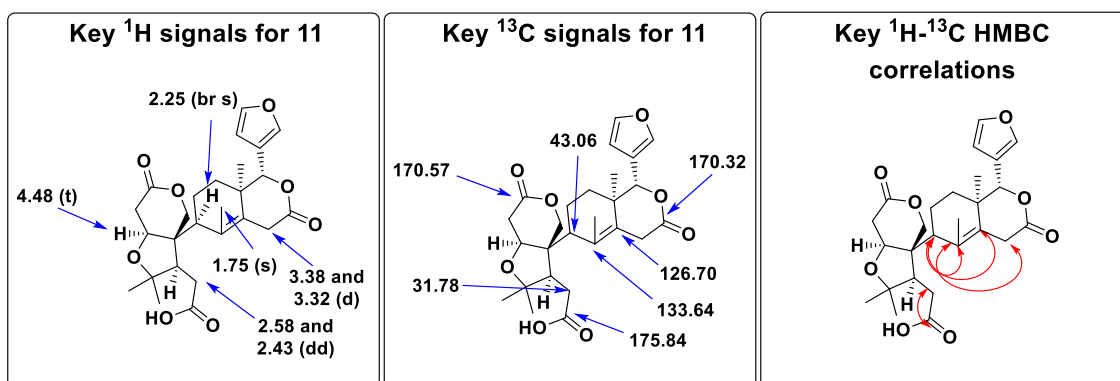



## SUPPORTING INFORMATION

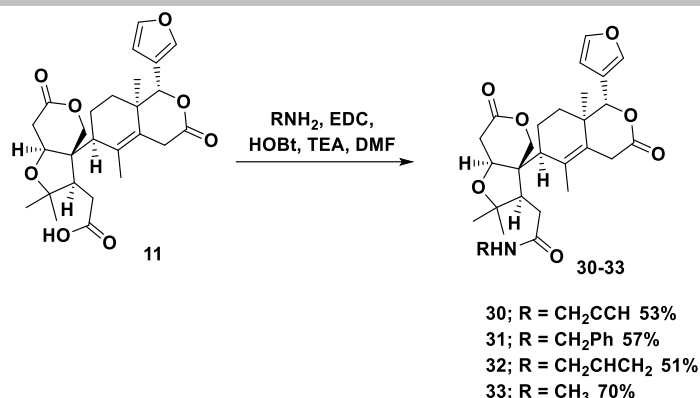

**Procedure:** HOBT (18 mg, 0.115 mmol), EDC (22  $\mu$ L, 0.12 mmol), and TEA (29  $\mu$ L, 0.21 mmol) were added to a solution of **11** (50 mg, 0.11 mmol) in DMF (0.5 ml), and the resulting mixture was stirred 30 minutes at 30° C. The suitable amine (0.12 mmol) was added to the mixture and the reaction was stirred overnight. The reaction was diluted with dichloromethane and washed with water, 5% citric acid, brine, 5% NaHCO<sub>3</sub>, and Brine. The organic layer was dried over Na<sub>2</sub>SO<sub>4</sub>, concentrated by distillation at reduced pressure, and the residue was purified by flash chromatography on silica gel (hexane-ethyl acetate 7:3), giving **30-33** (51-70%) as white solids.

**30** (30 mg, 53%)

**<sup>1</sup>H NMR (CDCl<sub>3</sub>, 500 MHz):**  $\delta$  7.55 (d,  $J$  = 1.8 Hz, 1H), 7.37 (dd,  $J$  = 1.8, 1.8 Hz, 1H), 6.43 (d,  $J$  = 1.8 Hz, 1H), 6.20 (t,  $J$  = 5.5 Hz, 1H), 5.41 (s, 1H), 4.63 (t,  $J$  = 3.8 Hz, 1H), 4.26 (d,  $J$  = 12.3 Hz, 1H), 4.09 (ddd,  $J$  = 17.5, 5.5, 2.5 Hz, 1H), 4.04 – 3.94 (m, 2H), 3.46 (dt,  $J$  = 21.9, 1.9 Hz, 1H), 3.37 (d,  $J$  = 21.9 Hz, 1H), 3.03 (dd,  $J$  = 9.7, 4.9 Hz, 1H), 2.75 (t,  $J$  = 3.8 Hz, 2H), 2.44 – 2.36 (m, 2H), 2.31 (d,  $J$  = 5.9 Hz, 1H), 2.27 (t,  $J$  = 2.5 Hz, 1H), 1.84 (s, 3H), 1.80 – 1.72 (m, 1H), 1.70 (d,  $J$  = 14.5 Hz, 1H), 1.43 (td,  $J$  = 14.5, 3.4 Hz, 1H), 1.35-1.28 (m, 1H), 1.22 (s, 3H), 1.12 (s, 3H), 1.07 (s, 3H).

**<sup>13</sup>C NMR (CDCl<sub>3</sub>, 125 MHz):**  $\delta$  171.17, 170.69, 170.29, 142.80, 142.00, 134.21, 126.45, 120.37, 109.94, 83.03, 80.89, 79.37, 75.85, 71.62, 70.35, 52.26, 47.61, 44.11, 38.06, 34.96, 34.09, 33.96, 29.83, 29.26, 28.53, 24.88, 22.20, 20.14, 18.32.

**HRMS(ESI):**  $m/z$  calc. for C<sub>29</sub>H<sub>36</sub>NO<sub>7</sub> [M+H]<sup>+</sup>: 510.2492, found: 510.2494.

**mp:** 128-129° C.

**Opt. Rot.:** [ $\alpha$ ]<sub>D</sub><sup>25</sup> = - 132 (c = 0.11, acetone).

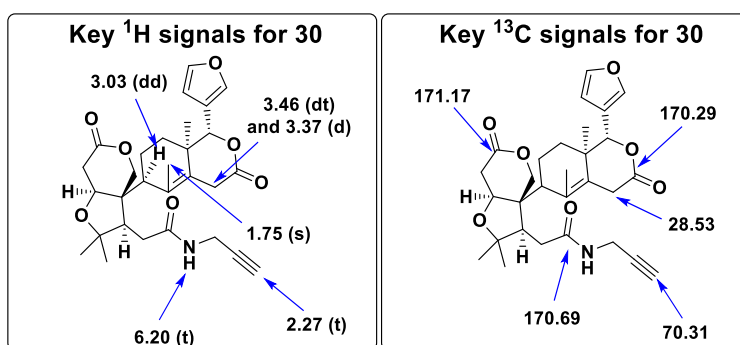

**31** (34 mg, 57%)

**<sup>1</sup>H NMR (CDCl<sub>3</sub>, 500 MHz):**  $\delta$  7.47 (d,  $J$  = 1.5 Hz, 1H), 7.36 – 7.26 (m, 6H), 6.40 (d,  $J$  = 1.9 Hz, 1H), 6.22 (t,  $J$  = 5.9 Hz, 1H), 5.42 (s, 1H), 4.59 (dd,  $J$  = 3.8 Hz, 1H), 4.44 (dd,  $J$  = 6.2, 5.9 Hz, 2H), 4.25 (d,  $J$  = 12.3 Hz, 1H), 4.01 (d,  $J$  = 12.3 Hz, 1H), 3.45 (dt,  $J$  = 21.9, 1.9 Hz, 1H), 3.36 (d,  $J$  = 21.9 Hz, 1H), 3.04 (dd,  $J$  = 9.9, 4.8 Hz, 1H), 2.72 (d,  $J$  = 3.8 Hz, 2H), 2.39 – 2.29 (m, 3H), 1.83 (s, 3H), 1.74 (ddd,  $J$  = 14.6, 6.0, 3.4 Hz, 1H), 1.72 – 1.64 (m, 1H), 1.46 (td,  $J$  = 14.3, 3.5 Hz, 1H), 1.22 (s, 3H), 1.11 (s, 3H), 1.10 – 1.07 (m, 1H), 1.06 (s, 3H).

**<sup>13</sup>C NMR (CDCl<sub>3</sub>, 125 MHz):**  $\delta$  171.14, 170.54, 170.28, 142.76, 141.87, 138.01, 134.09, 128.81 (2C), 127.87 (2C), 127.67, 126.52, 120.46, 109.96, 83.03, 80.92, 75.84, 70.31, 52.24, 47.71, 44.10, 43.78, 38.07, 34.95, 34.29, 33.95, 29.84, 28.53, 24.93, 22.14, 20.14, 18.28.

**HRMS(ESI):**  $m/z$  calc. for C<sub>33</sub>H<sub>40</sub>NO<sub>9</sub> [M+H]<sup>+</sup>: 562.2805, found: 562.2806.

**mp:** 118-120° C.

**Opt. Rot.:** [ $\alpha$ ]<sub>D</sub><sup>25</sup> = - 183 (c = 0.16, acetone).

## SUPPORTING INFORMATION

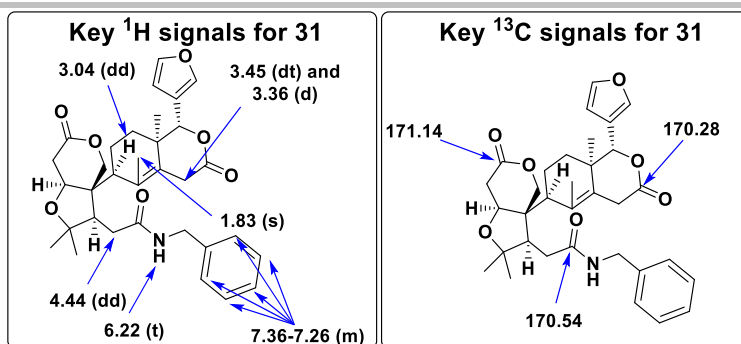

**32** (28 mg, 51%)

**$^1\text{H}$  NMR (CDCl<sub>3</sub>, 500 MHz):**  $\delta$  7.44 (d,  $J$  = 1.9 Hz, 1H), 7.30 (dd,  $J$  = 1.9, 1.9 Hz, 1H), 6.36 (d,  $J$  = 1.9 Hz, 1H), 5.83 – 5.71 (m, 2H), 5.35 (s, 1H), 5.16 – 5.09 (m, 2H), 4.55 (t,  $J$  = 3.8 Hz, 1H), 4.21 (d,  $J$  = 12.2 Hz, 1H), 3.97 (d,  $J$  = 12.2 Hz, 1H), 3.84 (dd,  $J$  = 5.7, 5.7 Hz, 2H), 3.39 (d,  $J$  = 21.8 Hz, 1H), 3.31 (d,  $J$  = 21.8 Hz, 1H), 2.97 (t,  $J$  = 7.3 Hz, 1H), 2.69 (d,  $J$  = 3.8 Hz, 2H), 2.33 (d,  $J$  = 7.3 Hz, 2H), 2.24 (d,  $J$  = 5.8 Hz, 1H), 1.77 (s, 3H), 1.69 (ddd,  $J$  = 14.7, 6.1, 3.3 Hz, 1H), 1.66 – 1.58 (m, 1H), 1.38 (td,  $J$  = 14.2, 3.5 Hz, 1H), 1.16 (s, 3H), 1.08 (s, 3H), 1.03 – 0.98 (m, 1H), 1.01 (s, 3H).

**$^{13}\text{C}$  NMR (CDCl<sub>3</sub>, 125 MHz):**  $\delta$  171.06, 170.51, 170.26, 142.77, 141.97, 134.20, 133.90, 126.47, 120.44, 116.81, 109.95, 83.01, 80.88, 75.79, 70.25, 52.28, 47.48, 43.97, 42.04, 38.08, 34.99, 34.22, 33.98, 29.89, 28.49, 24.95, 22.20, 20.15, 18.30.

**HRMS(ESI):**  $m/z$  calc. for C<sub>29</sub>H<sub>38</sub>NO<sub>7</sub> [M+H]<sup>+</sup>: 512.2648, found: 512.2650.

**mp:** 110-111° C.

**Opt. Rot.:**  $[\alpha]_{\text{D}}^{25}$  = - 229 ( $c$  = 0.13, acetone).

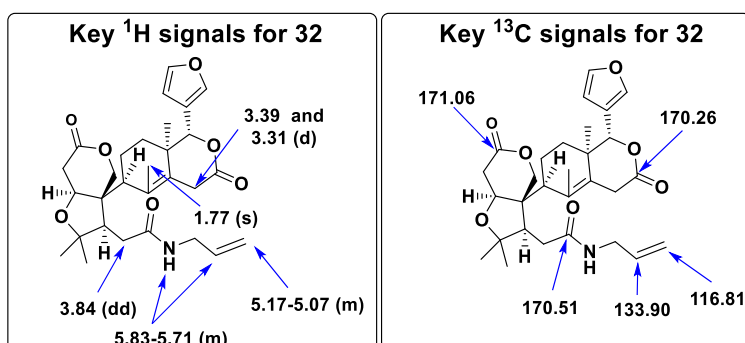

**33** (30 mg, 70%)

**$^1\text{H}$  NMR (CDCl<sub>3</sub>, 500 MHz):**  $\delta$  7.53 (d,  $J$  = 1.8 Hz, 1H), 7.37 (dd,  $J$  = 1.8, 1.8 Hz, 1H), 6.43 (d,  $J$  = 1.8 Hz, 1H), 5.89 (q,  $J$  = 4.7 Hz, 1H), 5.42 (s, 1H), 4.60 (t,  $J$  = 3.9 Hz, 1H), 4.25 (d,  $J$  = 12.3 Hz, 1H), 4.04 (d,  $J$  = 12.3 Hz, 1H), 3.44 (dt,  $J$  = 21.8, 1.8 Hz, 1H), 3.37 (d,  $J$  = 21.8 Hz, 1H), 3.02 (dd,  $J$  = 8.3, 6.3 Hz, 1H), 2.82 (d,  $J$  = 4.7 Hz, 3H), 2.75 (d,  $J$  = 3.8 Hz, 2H), 2.37 – 2.33 (m, 2H), 2.30 (d,  $J$  = 5.9 Hz, 1H), 1.83 (s, 3H), 1.74 (ddd,  $J$  = 14.6, 6.0, 3.3 Hz, 1H), 1.71 – 1.65 (m, 1H), 1.46 (td,  $J$  = 14.3, 3.6 Hz, 1H), 1.22 (s, 3H), 1.11 (s, 3H), 1.09 – 1.05 (m, 1H), 1.06 (s, 3H).

**$^{13}\text{C}$  NMR (CDCl<sub>3</sub>, 125 MHz):**  $\delta$  171.36, 171.23, 170.35, 142.81, 141.90, 134.03, 126.54, 120.50, 109.92, 82.96, 80.92, 75.69, 70.26, 52.21, 47.72, 44.00, 38.04, 34.97, 34.01, 33.94, 29.82, 28.53, 26.44, 24.83, 22.15, 20.15, 18.30.

**HRMS(ESI):**  $m/z$  calc. for C<sub>27</sub>H<sub>36</sub>NO<sub>7</sub> [M+H]<sup>+</sup>: 486.2492, found: 486.24933.

**mp:** 140-141° C.

**Opt. Rot.:**  $[\alpha]_{\text{D}}^{25}$  = - 214 ( $c$  = 0.11, acetone).

## SUPPORTING INFORMATION

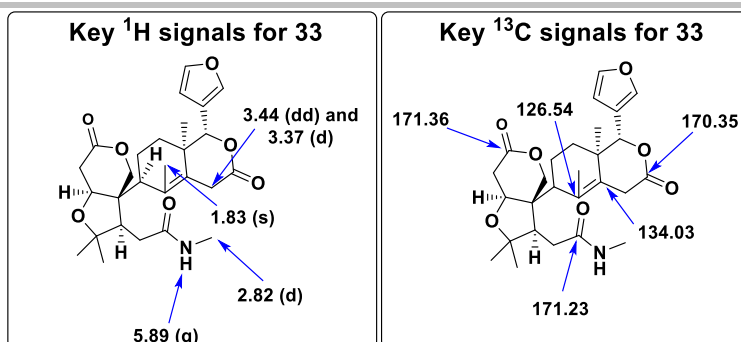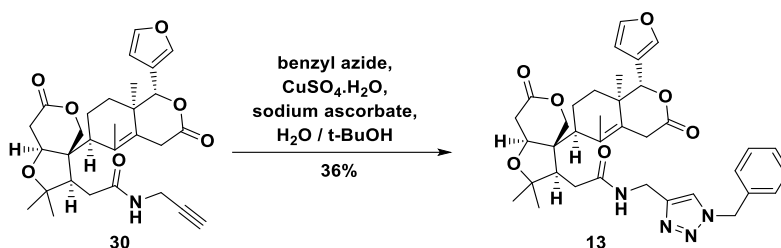

**Procedure:** Copper (II) sulfate (1 mg, 0.004 mmol) and sodium ascorbate (4 mg, 0.19 mmol) were added to a solution of **30** (100 mg, 0.19 mmol) in H<sub>2</sub>O (3 mL) and *t*-BuOH (1.5 mL). Benzyl azide (26 μL, 0.24 mmol) was added to the resulting suspension and the mixture was stirred at 30° C for 48 h. The solvent was then evaporated and the solution was extracted three times with dichloromethane. The combined organic layers were dried over Na<sub>2</sub>SO<sub>4</sub> and concentrated by distillation at reduced pressure. The obtained residue was further purified by flash chromatography on silica gel (hexane-ethyl acetate 7:3) to give **13** (43 mg, 36%) as a white solid.

**<sup>1</sup>H NMR (CDCl<sub>3</sub>, 500 MHz):** δ 7.47 (d, *J* = 1.8 Hz, 1H), 7.38 – 7.34 (m, 4H), 7.26 – 7.24 (m, 2H), 6.84 (br s, 1H), 6.38 (d, *J* = 1.9 Hz, 1H), 5.56 (d, *J* = 14.7 Hz, 1H), 5.42 (d, *J* = 14.7 Hz, 1H), 5.35 (s, 1H), 4.57 (t, *J* = 4.1, 1H), 4.55 (dd, 15.5, 5.1 Hz, 1H), 4.44 (dd, 15.5, 5.1 Hz, 1H), 4.26 (d, *J* = 12.2 Hz, 1H), 4.02 (d, *J* = 12.2 Hz, 1H), 3.46 (dt, *J* = 21.8, 1.8 Hz, 1H), 3.39 (d, *J* = 21.9 Hz, 1H), 2.96 (dd, *J* = 11.2, 3.1 Hz, 1H), 2.80 – 2.70 (m, 2H), 2.43 – 2.39 (m, 2H), 2.27 (d, *J* = 5.5 Hz, 1H), 1.82 (s, 3H), 1.74 – 1.66 (m, 2H), 1.41 – 1.34 (m, 1H), 1.26-1.25 (m, 2H), 1.13 (s, 3H), 1.06 (s, 3H), 1.02 (s, 3H).

**<sup>13</sup>C NMR (CDCl<sub>3</sub>, 125 MHz):** δ 170.86, 170.85, 170.24, 142.77, 141.68, 134.15, 133.95, 129.23 (2C), 128.99, 128.24 (2C), 126.63, 120.55, 109.94, 82.95, 80.83, 77.23, 76.77, 75.95, 69.86, 54.48, 52.32, 47.10, 43.47, 37.98, 34.91, 34.79, 33.94, 33.81, 30.01, 28.63, 25.09, 22.23, 20.08, 18.23.

**HRMS(ESI):** *m/z* calc. for C<sub>36</sub>H<sub>43</sub>N<sub>4</sub>O<sub>7</sub> [M+H]<sup>+</sup>: 643.3131, found: 643.3114.

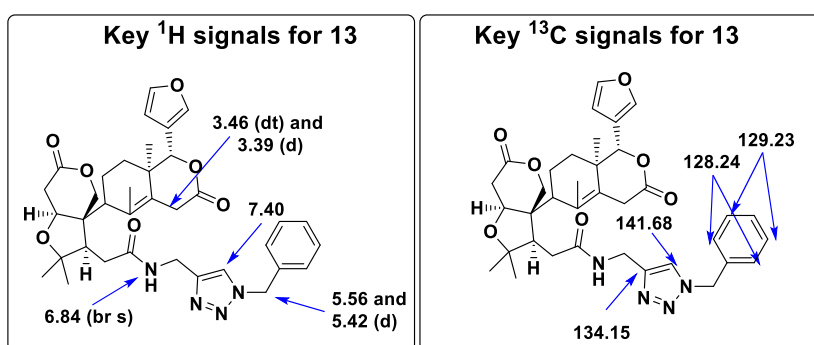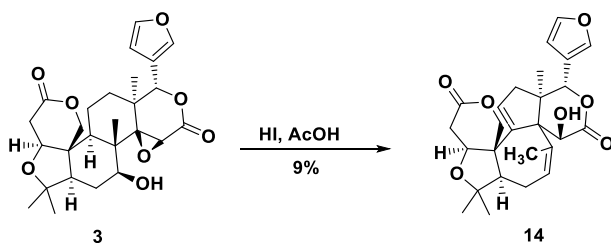

**Procedure:** A solution of **3** (500 mg, 1.06 mmol) in acetic acid (8.5 mL) and hydriodic acid (8.5 mL) was heated under reflux for 6 h. The reaction mixture was cooled to room temperature and slowly poured into 400 mL of sodium sulfite saturated solution and

## SUPPORTING INFORMATION

extracted three times with dichloromethane. The organic layers were combined, washed with brine, dried over  $\text{Na}_2\text{SO}_4$ , and concentrated by distillation under reduced pressure. The crude residue was purified by silica gel flash chromatography (hexane-ethyl acetate 4:6) to provide **14** (40 mg, 9%) as a white solid.

**$^1\text{H}$  NMR (DMSO- $d_6$ , 500 MHz):**  $\delta$  7.71 (d,  $J$  = 1.8 Hz, 1H), 7.68 (dd,  $J$  = 1.8, 1.8 Hz, 1H), 6.52 (d,  $J$  = 1.8 Hz, 1H), 6.21 (d,  $J$  = 4.9 Hz, 1H), 5.94 (d,  $J$  = 4.9 Hz, 1H), 5.47 (s, 1H), 5.17 (dt,  $J$  = 4.3, 2.1 Hz, 1H), 4.37 (d,  $J$  = 11.6 Hz, 1H), 4.37 (d,  $J$  = 4.9 Hz, 1H), 4.26 (dd,  $J$  = 4.6, 3.1 Hz, 1H), 3.90 (d,  $J$  = 11.6 Hz, 1H), 2.98 (dd,  $J$  = 17.1, 4.6 Hz, 1H), 2.67 (dd,  $J$  = 17.1, 3.1 Hz, 1H), 2.34 – 2.12 (m, 3H), 2.07 (dd, 12.1, 5.3 Hz, 1H), 1.45 (dd,  $J$  = 18.5, 5.3 Hz, 1H), 1.18 (s, 3H), 1.09 (s, 3H), 1.09 (s, 3H), 0.86 (s, 3H).

**$^{13}\text{C}$  NMR (DMSO- $d_6$ , 125 MHz):**  $\delta$  173.13, 170.78, 143.26, 141.23, 137.94, 135.65, 123.55, 120.90, 115.62, 110.17, 79.47, 77.46, 74.08, 69.87, 67.03, 53.48, 47.07, 44.40, 38.64, 35.35, 33.65, 30.49, 24.38, 23.63, 15.62, 15.20.

**HRMS(ESI):**  $m/z$  calc. for  $\text{C}_{26}\text{H}_{31}\text{O}_7$   $[\text{M}+\text{H}]^+$ : 455.2059, found: 455.2061.

**mp:** decomposes upon heating above 130° C.

**Opt. Rot.:**  $[\alpha]_D^{25} = -16$  ( $c$  = 0.03, acetone/chloroform).

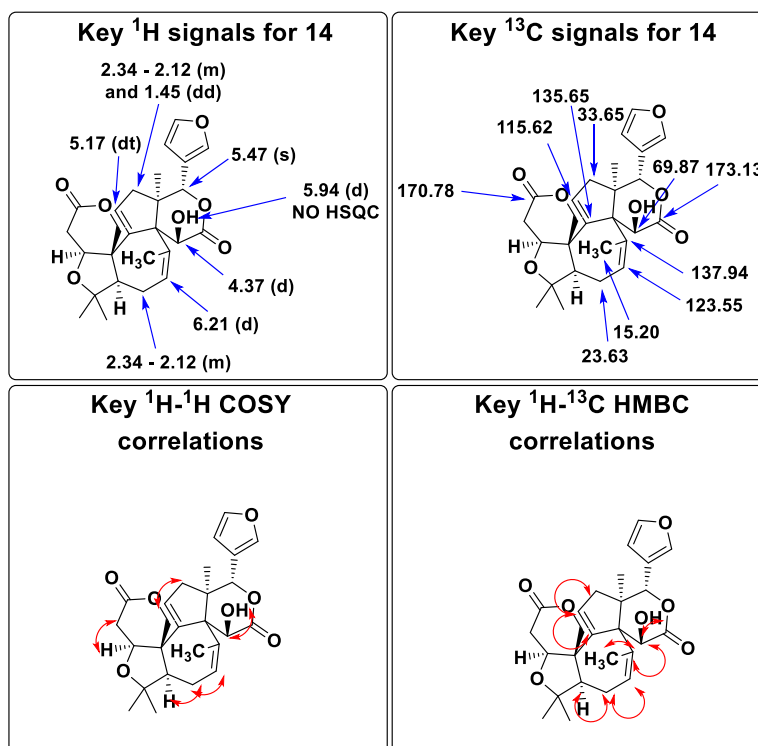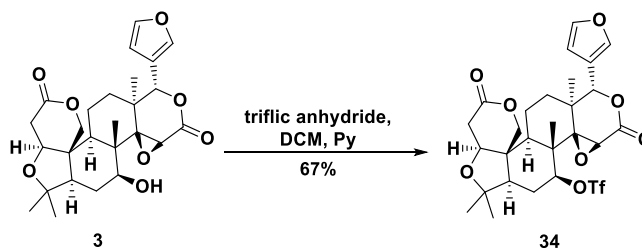

**Procedure:** Triflic anhydride (81  $\mu\text{L}$ , 0.48 mmol) was added at 0° C to a solution of **3** (115 mg, 0.24 mmol) in dichloromethane (1 mL) and pyridine (77  $\mu\text{L}$ ), and the resulting mixture was stirred at 30° C for 1 h. The reaction was quenched with iced water and extracted three times with dichloromethane. The organic layers were combined, washed with brine, dried over  $\text{Na}_2\text{SO}_4$ , and concentrated by distillation under reduced pressure. The crude residue was purified by silica gel flash chromatography (hexane-ethyl acetate 4:6) to provide **34** (97 mg, 67%) as a yellowish solid.

**$^1\text{H}$  NMR (DMSO- $d_6$ , 500 MHz):**  $\delta$  7.71 (d,  $J$  = 1.7 Hz, 1H), 7.69 (dd,  $J$  = 1.7, 1.7 Hz, 1H), 6.49 (d,  $J$  = 1.7 Hz, 1H), 5.55 (s, 1H), 4.62 (d,  $J$  = 13.2 Hz, 1H), 4.50 (d,  $J$  = 2.1 Hz, 1H), 4.42 (d,  $J$  = 13.2 Hz, 1H), 4.33 (s, 1H), 4.08 (d,  $J$  = 3.6 Hz, 1H), 2.68 – 2.56 (m, 3H), 2.26 – 2.14 (m, 3H), 2.04 – 1.90 (m, 1H), 1.75 – 1.69 (m, 1H), 1.65 – 1.59 (m, 1H), 1.30 – 1.23 (m, 1H), 1.27 (s, 3H), 1.19 (s, 3H), 1.04 (s, 3H), 0.83 (s, 3H).

**$^{13}\text{C}$  NMR (DMSO- $d_6$ , 125 MHz):**  $\delta$  170.55, 167.93, 143.96, 142.33, 121.15 (q,  $J$  = 320 Hz, 1C), 120.68, 110.69, 87.58, 80.44, 79.52, 78.48, 68.82, 65.49, 55.69, 51.50, 45.82, 44.60, 42.17, 38.28, 36.10, 30.61, 26.22, 23.30, 21.99, 18.43, 18.07, 16.47.

## SUPPORTING INFORMATION

**<sup>19</sup>F NMR (DMSO-*d*<sub>6</sub>, 470 MHz):** δ - 77.75.

**HRMS(ESI):** *m/z* calc. for C<sub>27</sub>H<sub>32</sub>O<sub>10</sub>SF<sub>3</sub> [M+H]<sup>+</sup>: 605.1668, found: 605.1677.

**mp:** decomposes upon heating above 100° C.

**Opt. Rot.:** [α]<sub>D</sub><sup>25</sup> = + 17 (c = 0.23, acetone).

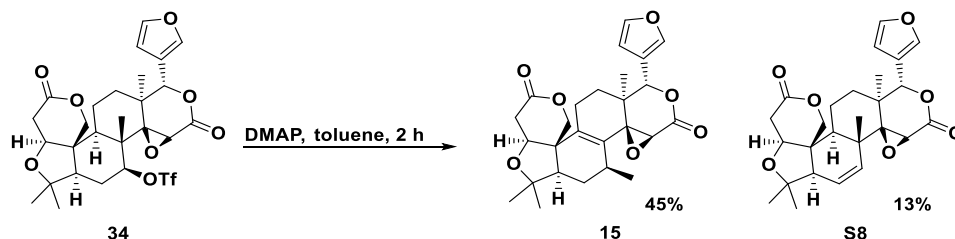

**Procedure:** DMAP (220 mg, 1.8 mmol) was added to a solution of **34** (434 mg, 0.7 mmol) in toluene (5 mL) and the resulting solution was heated at 80° C for 2 h. Toluene was evaporated and the residue was partitioned between water and dichloromethane. The aqueous layer was extracted three times with dichloromethane. The organic layers were combined, washed with brine, dried over Na<sub>2</sub>SO<sub>4</sub>, and concentrated by distillation under reduced pressure. The crude residue was purified by silica gel flash chromatography (hexane-ethyl acetate 1:1) to provide **15** (144 mg, 45%) and **S8** (41 mg, 13%) as white solids.

**15** (144 mg, 45%)

**<sup>1</sup>H NMR (CDCl<sub>3</sub>, 500 MHz):** δ 7.42 (dd, *J* = 1.7, 1.7 Hz, 1H), 7.41 (d, *J* = 1.7 Hz, 1H), 6.36 (d, *J* = 1.7 Hz, 1H), 5.48 (s, 1H), 4.51 (d, *J* = 12.6 Hz, 1H), 4.30 (t, *J* = 3.2 Hz, 1H), 4.13 (s, 1H), 4.00 (d, *J* = 12.6 Hz, 1H), 2.94 (dd, *J* = 17.1, 3.2 Hz, 1H), 2.77 (dd, *J* = 17.1, 3.2 Hz, 1H), 2.52 – 2.43 (m, 1H), 2.33 (ddd, *J* = 18.7, 6.4, 1.4 Hz, 1H), 2.24 – 2.16 (m, 1H), 2.15 – 2.05 (m, 2H), 1.68 (ddd, *J* = 18.7, 12.3, 6.4 Hz, 1H), 1.51 (ddd, *J* = 13.0, 6.4, 1.4 Hz, 1H), 1.39 – 1.30 (m, 1H), 1.26 (s, 3H), 1.15 (s, 3H), 1.13 (d, *J* = 6.9 Hz, 3H), 0.94 (s, 3H).

**<sup>13</sup>C NMR (CDCl<sub>3</sub>, 125 MHz):** δ 170.05, 167.31, 144.95, 143.27, 141.22, 128.94, 119.80, 109.90, 80.40, 76.29, 74.26, 67.29, 66.91, 55.47, 54.23, 48.57, 37.74, 36.01, 32.41, 30.43, 27.84, 26.81, 24.11, 23.31, 23.13, 13.28.

**HRMS(ESI):** *m/z* calc. for C<sub>26</sub>H<sub>31</sub>O<sub>7</sub> [M+H]<sup>+</sup>: 455.2070, found: 455.2074.

**mp:** 116-118° C.

**Opt. Rot.:** [α]<sub>D</sub><sup>25</sup> = + 58 (c = 0.16, acetone).

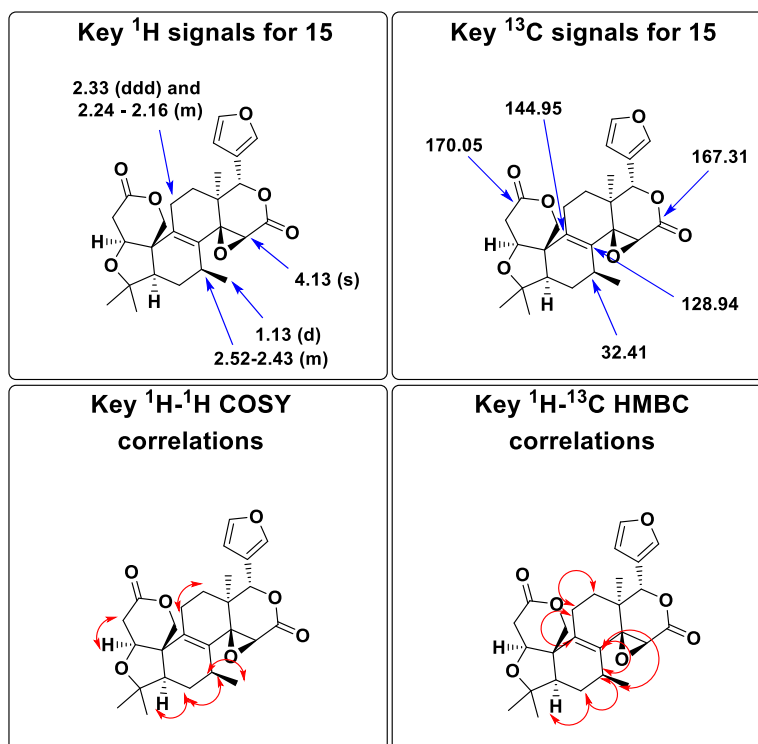

## SUPPORTING INFORMATION

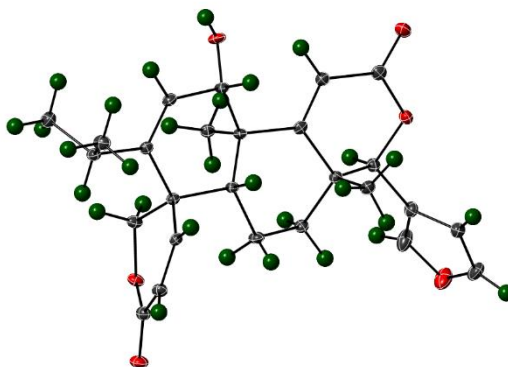

## Crystallography

**Experimental Protocol:** Intensity data were collected on a Bruker D8 Venture kappa diffractometer equipped with a Photon 100 CMOS detector. An Iµs microfocus Mo source ( $\lambda = 0.71073 \text{ \AA}$ ) coupled with a multi-layer mirror monochromator provided the incident beam. The sample was mounted on a 0.3 mm loop with the minimal amount of Paratone-N oil. Data was collected as a series of  $\varphi$  and/or  $\omega$  scans. Data was collected at 100 K using a cold stream of N<sub>2</sub>(g). The collection, cell refinement, and integration of intensity data was carried out with the APEX3 software.<sup>1</sup> A semi-empirical absorption correction was performed with SADABS.<sup>2</sup> The structure was phased with intrinsic methods using SHELXT<sup>3</sup> and refined with the full-matrix least-squares program SHELXL.<sup>4</sup>

CCDC: 2082419

- (1) Bruker (2016). APEX3. Bruker AXS, Inc., Madison, Wisconsin, USA.  
 (2) L. Krause, R. Herbst-Irmer, G. M. Sheldrick, D. Stalke, *J. Appl. Cryst.*, **2015**, *48*, 3–10.  
 (3) G. M. Sheldrick, *Acta Cryst.* **2015**, *A71*, 3–8.  
 (4) G. M. Sheldrick, *Acta Cryst.* **2015**, *C71*, 3–8.

**Table S6.** Crystal data and structure refinement for ed93as.

|                                   |                                                                         |
|-----------------------------------|-------------------------------------------------------------------------|
| Identification code               | ed93as                                                                  |
| Empirical formula                 | C <sub>26.50</sub> H <sub>30.50</sub> Cl <sub>1.50</sub> O <sub>6</sub> |
| Formula weight                    | 498.18                                                                  |
| Temperature                       | 100(2) K                                                                |
| Wavelength                        | 1.54178 Å                                                               |
| Crystal system                    | Orthorhombic                                                            |
| Space group                       | P2 <sub>1</sub> 2 <sub>1</sub> 2 <sub>1</sub>                           |
| Unit cell dimensions              | a = 10.3124(5) Å a = 90°.                                               |
|                                   | b = 17.5945(8) Å b = 90°.                                               |
|                                   | c = 26.7645(12) Å g = 90°.                                              |
| Volume                            | 4856.2(4) Å <sup>3</sup>                                                |
| Z                                 | 8                                                                       |
| Density (calculated)              | 1.363 Mg/m <sup>3</sup>                                                 |
| Absorption coefficient            | 2.238 mm <sup>-1</sup>                                                  |
| F(000)                            | 2104                                                                    |
| Crystal size                      | 0.396 x 0.235 x 0.048 mm <sup>3</sup>                                   |
| Theta range for data collection   | 3.006 to 68.261°.                                                       |
| Index ranges                      | -11 ≤ h ≤ 12, -21 ≤ k ≤ 21, -31 ≤ l ≤ 32                                |
| Reflections collected             | 68728                                                                   |
| Independent reflections           | 8905 [R(int) = 0.0386]                                                  |
| Completeness to theta = 67.679°   | 100.0 %                                                                 |
| Absorption correction             | Semi-empirical from equivalents                                         |
| Max. and min. transmission        | 0.7531 and 0.6058                                                       |
| Refinement method                 | Full-matrix least-squares on F <sup>2</sup>                             |
| Data / restraints / parameters    | 8905 / 84 / 640                                                         |
| Goodness-of-fit on F <sup>2</sup> | 1.065                                                                   |
| Final R indices [I > 2σ(I)]       | R1 = 0.0320, wR2 = 0.0869                                               |

## SUPPORTING INFORMATION

R indices (all data) R1 = 0.0325, wR2 = 0.0874  
 Absolute structure parameter -0.003(3)  
 Extinction coefficient n/a  
 Largest diff. peak and hole 0.333 and -0.447 e.Å<sup>-3</sup>

**S8** (41 mg, 13%)

**<sup>1</sup>H NMR (CDCl<sub>3</sub>, 500 MHz):** δ 7.38 (d, *J* = 1.7 Hz, 1H), 7.35 (dd, *J* = 1.7, 1.7 Hz, 1H), 6.23 (d, *J* = 1.7 Hz, 1H), 5.68 (dd, *J* = 10.0, 2.4 Hz, 1H), 5.66 (s, 1H), 5.24 (dd, *J* = 10.0, 3.4 Hz, 1H), 4.37 (d, *J* = 12.7 Hz, 1H), 4.31 (d, *J* = 12.7 Hz, 1H), 4.05 (dd, *J* = 3.8, 2.2 Hz, 1H), 3.81 (s, 1H), 2.87 (dd, *J* = 16.6, 3.8 Hz, 1H), 2.77 (dd, *J* = 3.4, 2.4 Hz, 1H), 2.70 (dd, *J* = 13.1, 6.2 Hz, 1H), 2.52 (dd, *J* = 16.6, 2.2 Hz, 1H), 1.95 – 1.87 (m, 1H), 1.78 – 1.72 (m, 1H), 1.69 – 1.65 (m, 1H), 1.52 – 1.43 (m, 1H), 1.27 (s, 3H), 1.20 (s, 3H), 1.17 (s, 3H), 1.14 (s, 3H).

**<sup>13</sup>C NMR (CDCl<sub>3</sub>, 125 MHz):** δ 170.04, 167.55, 143.27, 141.24, 131.84, 122.20, 120.22, 109.53, 80.69, 78.43, 77.23, 73.06, 65.82, 60.59, 58.58, 46.54, 45.14, 41.74, 39.43, 35.66, 31.47, 25.43, 22.23, 21.86, 21.14, 17.60.

**HRMS(ESI):** *m/z* calc. for C<sub>26</sub>H<sub>31</sub>O<sub>7</sub> [M+H]<sup>+</sup>: 455.2070, found: 455.2074.

**Opt. Rot.:** [α]<sub>D</sub><sup>25</sup> = -84 (c = 0.16, acetone).

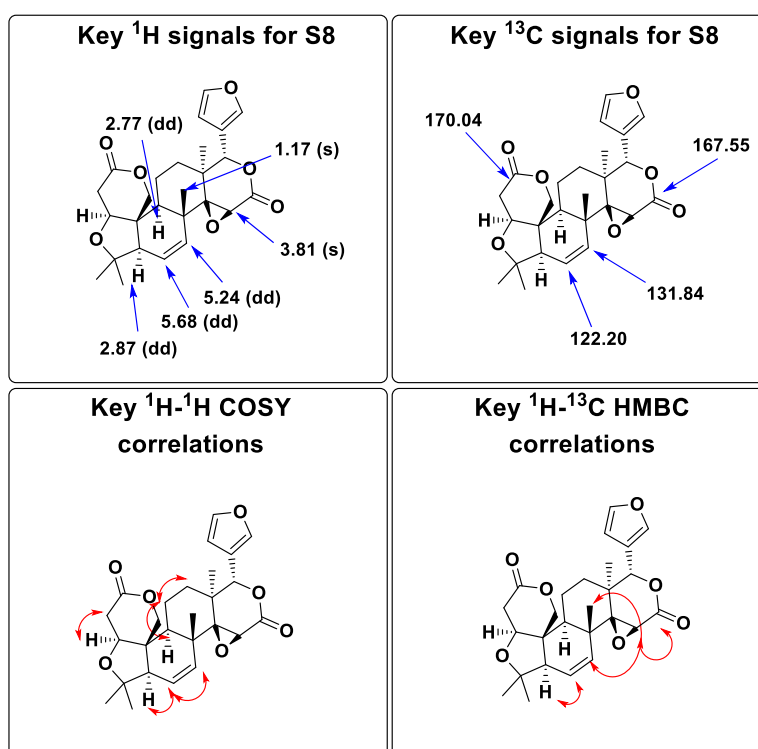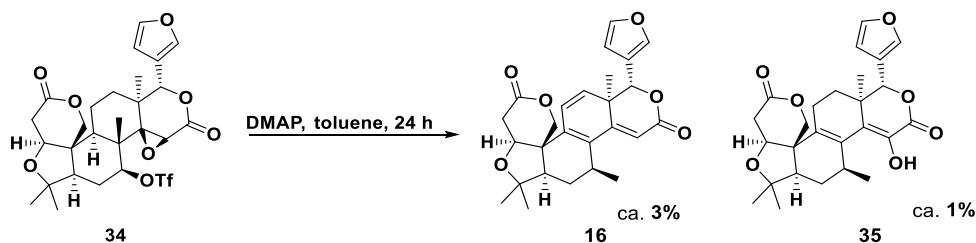

**Procedure:** DMAP (171 mg, 1.40 mmol) was added to a solution of **34** (340 mg, 0.56 mmol) in toluene (4 mL) and the resulting mixture was heated at 80° C for 24 h. Toluene was evaporated and the residue partitioned between water and dichloromethane. The aqueous layer was extracted three times with dichloromethane. The organic layers were combined, washed with brine, dried over Na<sub>2</sub>SO<sub>4</sub>, and concentrated by distillation under reduced pressure. The crude residue was purified by silica gel flash chromatography (hexane-ethyl acetate 4:6) to provide **16** (8 mg, ca. 3%) and **35** (3 mg, ca. 1%) as white solids.

**Note:** Formation of **15** (25 mg, 10%) was observed.

**16** (8 mg, ca. 3%)

## SUPPORTING INFORMATION

**$^1\text{H}$  NMR (CDCl<sub>3</sub>, 500 MHz):**  $\delta$  7.49 (d,  $J$  = 1.8 Hz, 1H), 7.42 (dd,  $J$  = 1.8, 1.8 Hz, 1H), 6.43 (dd,  $J$  = 1.8 Hz, 1H), 5.95 (s, 1H), 5.84 (d,  $J$  = 9.7 Hz, 1H), 5.75 (d,  $J$  = 9.7 Hz, 1H), 5.30 (s, 1H), 4.60 (d,  $J$  = 12.2 Hz, 1H), 4.19 (t,  $J$  = 3.5 Hz, 1H), 4.07 (d,  $J$  = 12.2 Hz, 1H), 2.95 – 2.82 (m, 3H), 2.21 (ddd,  $J$  = 13.4, 9.9, 4.7 Hz, 1H), 2.08 (dd,  $J$  = 14.9, 4.7 Hz, 1H), 1.40 (ddd,  $J$  = 14.9, 13.4, 6.2 Hz, 1H), 1.33 (d,  $J$  = 7.1 Hz, 3H), 1.21 (s, 3H), 1.14 (s, 3H), 1.10 (s, 3H).

**$^{13}\text{C}$  NMR (CDCl<sub>3</sub>, 125 MHz):**  $\delta$  169.94, 164.72, 160.58, 143.49, 142.14, 141.76, 134.99, 132.43, 121.77, 119.47, 112.85, 110.02, 80.38, 77.56, 74.66, 67.38, 54.73, 48.63, 41.75, 36.23, 30.41, 30.21, 27.03, 26.09, 23.60, 22.63.

**HRMS(ESI):**  $m/z$  calc. for C<sub>26</sub>H<sub>29</sub>O<sub>6</sub> [M+H]<sup>+</sup>: 437.1964, found: 437.1975.

**Opt. Rot.:**  $[\alpha]_{\text{D}}^{25}$  = + 45 ( $c$  = 0.06, acetone).

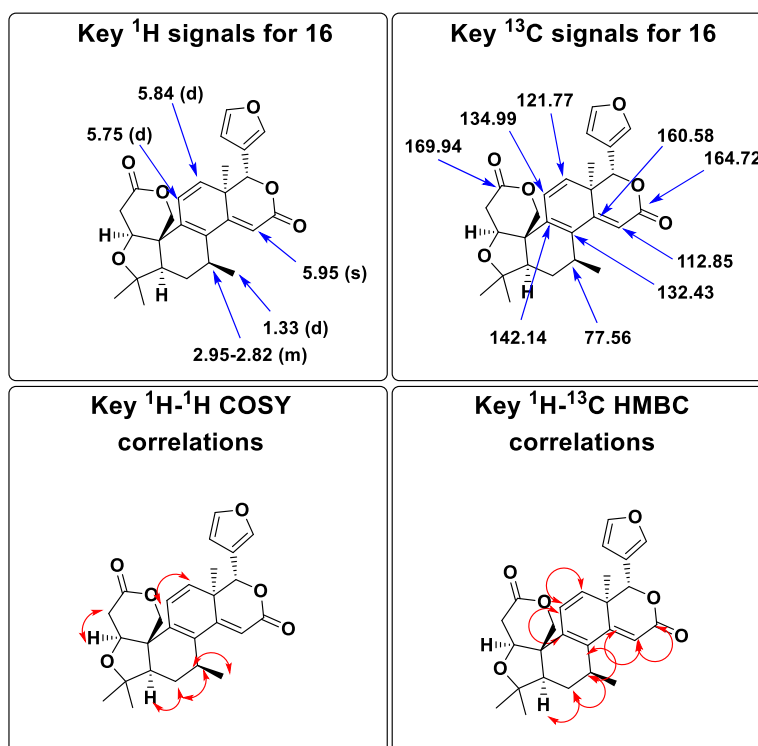

**35** (ca. 3 mg, 1%)

**$^1\text{H}$  NMR (CDCl<sub>3</sub>, 500 MHz):**  $\delta$  7.42 (d,  $J$  = 1.7 Hz, 1H), 7.37 (dd,  $J$  = 1.7, 1.7 Hz, 1H), 6.49 (s, 1H), 6.35 (d,  $J$  = 1.7 Hz, 1H), 5.10 (s, 1H), 4.54 (d,  $J$  = 12.8 Hz, 1H), 4.22 (t,  $J$  = 3.0 Hz, 1H), 3.95 (d,  $J$  = 12.8 Hz, 1H), 3.62 (ddd,  $J$  = 8.0, 6.9, 5.5 Hz, 1H), 2.89 (d,  $J$  = 17.0, 3.0 Hz, 1H), 2.72 (dd,  $J$  = 17.0, 3.0 Hz, 1H), 2.22 – 2.11 (m, 3H), 2.03 (ddd,  $J$  = 13.8, 9.8, 4.2 Hz, 1H), 1.38 – 1.29 (m, 2H), 1.25 – 1.21 (m, 1H), 1.19 (s, 3H), 1.18 (d,  $J$  = 6.9 Hz, 3H), 1.10 (s, 3H), 0.98 (s, 3H).

**$^{13}\text{C}$  NMR (CDCl<sub>3</sub>, 125 MHz):**  $\delta$  170.26, 166.05, 143.26, 141.77, 141.51, 135.82, 132.85, 125.83, 119.60, 109.91, 80.79, 80.48, 74.99, 67.04, 55.13, 49.11, 38.07, 36.35, 32.15, 30.41, 29.85, 26.61, 26.55, 23.05, 22.91, 17.61.

**HRMS(ESI):**  $m/z$  calc. for C<sub>26</sub>H<sub>31</sub>O<sub>7</sub> [M+H]<sup>+</sup>: 455.2070, found: 455.2076.



## SUPPORTING INFORMATION

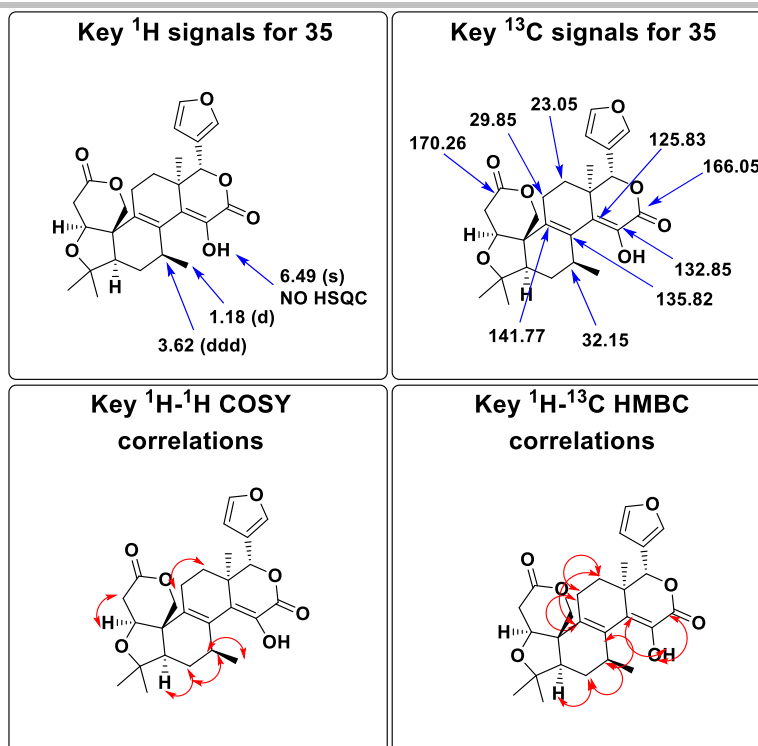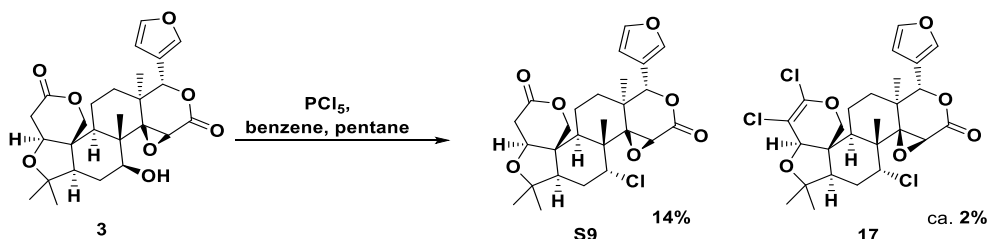

**Procedure:**  $\text{PCl}_5$  (704 mg, 3.36 mmol) was added to a solution of **3** (800 mg, 1.68 mmol) in dry benzene (24 mL) and pentene (24 mL) and the resulting solution was stirred at 30° C for 4 h. Water was added and the aqueous layer was extracted three times with dichloromethane. The organic layers were combined, washed with brine, dried over  $\text{Na}_2\text{SO}_4$ , and concentrated by distillation under reduced pressure. The crude residue was purified by silica gel flash chromatography (hexane-ethyl acetate 1:1) to provide **S9** (120 mg, 14%) and **17** (25 mg, ca. 2%) as white solids.

**S9** (120 mg, 14%)

**$^1\text{H}$  NMR (DMSO- $d_6$ , 500 MHz):**  $\delta$  7.75 (d,  $J = 1.7$  Hz, 1H), 7.73 (dd,  $J = 1.7, 1.7$  Hz, 1H), 6.54 (d,  $J = 1.7$  Hz, 1H), 5.60 (s, 1H), 4.69 (d,  $J = 13.1$  Hz, 1H), 4.53 (d,  $J = 13.1$  Hz, 1H), 4.51 (dd,  $J = 2.8, 2.8$  Hz, 1H), 4.25 (s, 1H), 4.18 (d,  $J = 3.7$  Hz, 1H), 2.73 – 2.68 (m, 2H), 2.64 (dd,  $J = 16.5, 3.9$  Hz, 1H), 2.58 (dd,  $J = 2.5, 13.4$  Hz, 1H), 2.37 (ddd,  $J = 14.9, 13.4, 2.8$  Hz, 1H), 2.13 – 2.06 (m, 1H), 1.89 (ddd,  $J = 14.9, 2.8, 2.5$  Hz, 1H), 1.78 (ddd,  $J = 14.1, 6.7, 2.8$  Hz, 1H), 1.71 – 1.63 (m, 1H), 1.35 – 1.29 (m, 1H), 1.25 (s, 3H), 1.25 (s, 3H), 1.07 (s, 3H), 0.99 (s, 3H).

**$^{13}\text{C}$  NMR (DMSO- $d_6$ , 125 MHz):**  $\delta$  170.57, 167.32, 143.84, 142.29, 120.87, 110.78, 80.15, 79.72, 78.38, 69.89, 67.02, 66.05, 57.81, 53.13, 45.83, 45.63, 41.90, 38.31, 36.09, 30.57, 27.41, 25.60, 22.00, 19.82, 17.42, 16.56.

**HRMS(ESI):**  $m/z$  calc. for  $\text{C}_{26}\text{H}_{32}\text{O}_7\text{Cl}$   $[\text{M}+\text{H}]^+$ : 491.1837, found: 491.1840.

**mp:** 181–182° C.

**Opt. Rot.:**  $[\alpha]_{\text{D}}^{25} = -85$  ( $c = 0.12$ , acetone).

## SUPPORTING INFORMATION

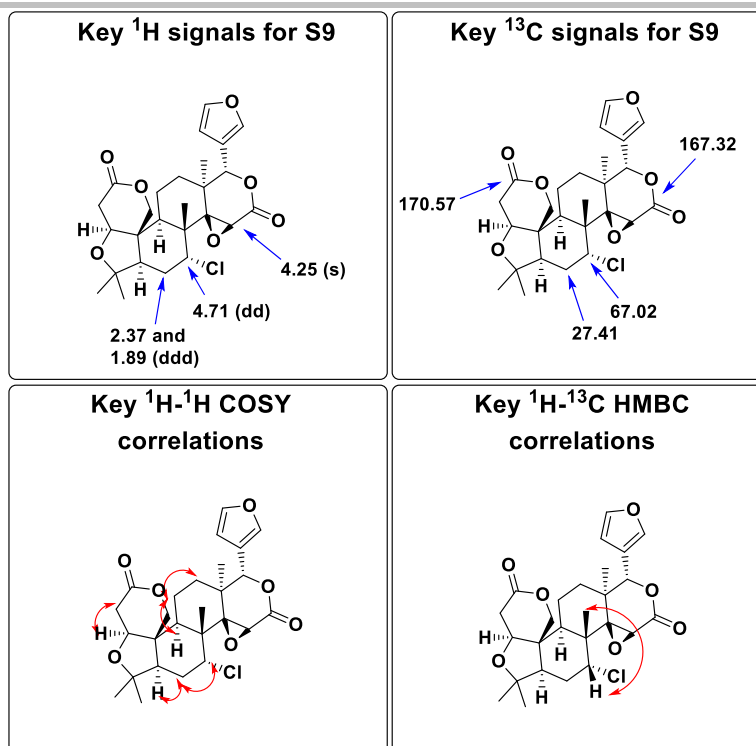

17 (25 mg, ca. 2%)

**$^1\text{H}$  NMR (CDCl<sub>3</sub>, 500 MHz):**  $\delta$  7.38 (br s, 2H), 6.31 (s, 1H), 5.56 (s, 1H), 4.65 (dd,  $J$  = 11.6, 1.7 Hz, 1H), 4.58 (d,  $J$  = 11.6 Hz, 1H), 3.98 (dd,  $J$  = 2.9, 2.9 Hz, 1H), 3.94 (s, 1H), 3.93 (d, 1.7 Hz, 1H), 2.78 (dd,  $J$  = 13.4, 2.8 Hz, 1H), 2.68 (dd,  $J$  = 13.7, 6.1 Hz, 1H), 2.32- 2.24 (m, 1H), 2.03 (ddd,  $J$  = 14.0, 13.4, 2.9 Hz, 1H), 1.94 (ddd,  $J$  = 14.0, 2.9, 2.8 Hz, 1H), 1.90 – 1.81 (m, 1H), 1.63 – 1.45 (m, 2H), 1.34 (s, 3H), 1.32 (s, 3H), 1.29 (s, 3H), 1.20 (s, 3H).

**$^{13}\text{C}$  NMR (CDCl<sub>3</sub>, 125 MHz):**  $\delta$  166.59, 144.51, 143.03, 141.18, 120.34, 109.92, 107.08, 81.99, 79.59, 78.65, 70.55, 69.53, 64.86, 58.28, 52.53, 48.07, 46.45, 40.89, 38.32, 30.50, 27.84, 25.86, 25.27, 20.15, 18.34, 16.04.

**HRMS(ESI):**  $m/z$  calc. for C<sub>26</sub>H<sub>30</sub>O<sub>6</sub>Cl<sub>3</sub> [M+H]<sup>+</sup>: 543.1108, found: 543.1096.

**mp:** decomposes upon heating above 160° C.

**Opt. Rot.:**  $[\alpha]_{\text{D}}^{25}$  = - 93 (c = 0.05, acetone/chloroform).

## SUPPORTING INFORMATION

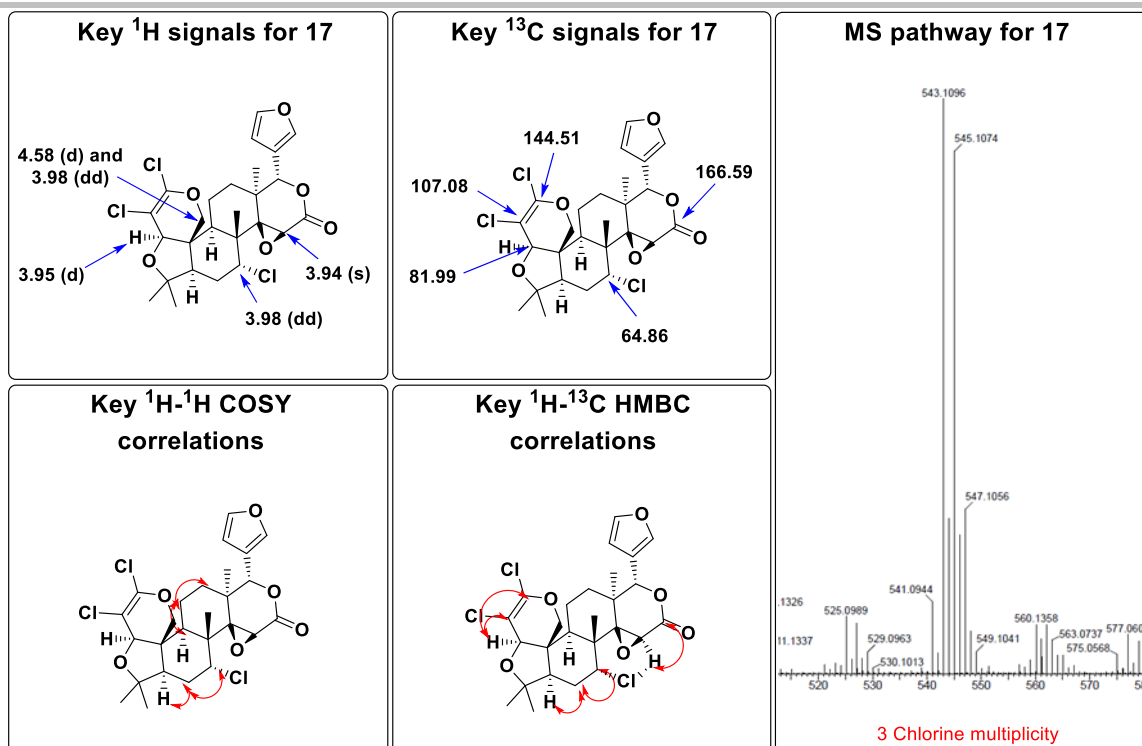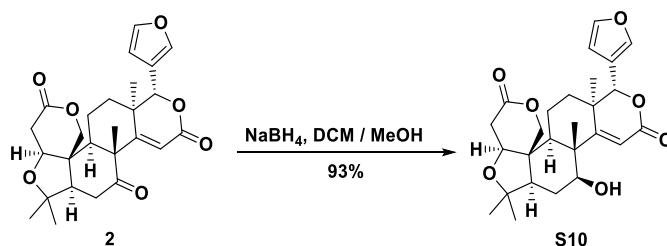

**Procedure:**  $\text{NaBH}_4$  (95 mg, 2.5 mmol) in anhydrous methanol (6 mL) was added to a solution of **2** (200 mg, 0.44 mmol) in dichloromethane (8 mL) at  $-78^\circ\text{C}$  and the resulting mixture was stirred at  $-78^\circ\text{C}$ . After 15 minutes, the reaction was quenched by addition of 2 M hydrochloric acid solution and extracted three times with dichloromethane. The organic layers were dried over  $\text{Na}_2\text{SO}_4$  and concentrated by distillation under reduced pressure to obtain a crude residue that was purified by silica gel flash chromatography (hexane-ethyl acetate 3:7) to provide **S10** (186 mg, 93%) as a white solid.

**$^1\text{H}$  NMR (DMSO- $d_6$ , 500 MHz):**  $\delta$  7.73 (d,  $J = 1.7$  Hz, 1H), 7.69 (dd,  $J = 1.7, 1.7$  Hz, 1H), 6.84 (s, 1H), 6.53 (d,  $J = 1.7$  Hz, 1H), 5.26 (d,  $J = 5.1$  Hz, 1H), 5.09 (s, 1H), 4.52 (d,  $J = 13.2$  Hz, 1H), 4.44 (d,  $J = 13.2$  Hz, 1H), 4.01 (d,  $J = 3.8$  Hz, 1H), 3.70 (dt,  $J = 10.4, 5.1$  Hz, 1H), 2.62 (dd,  $J = 16.5, 1.6$  Hz, 1H), 2.56 (dd,  $J = 16.4, 3.8$  Hz, 1H), 2.11 – 2.01 (m, 2H), 1.95 (dd,  $J = 13.5, 2.5$  Hz, 1H), 1.74 (ddd,  $J = 12.9, 5.3, 2.4$  Hz, 1H), 1.69 – 1.54 (m, 3H), 1.19 – 1.16 (m, 1H), 1.17 (s, 3H), 1.14 (s, 3H), 1.04 (s, 3H), 0.98 (s, 3H).

**$^{13}\text{C}$  NMR (DMSO- $d_6$ , 125 MHz):**  $\delta$  178.14, 170.79, 165.78, 143.74, 142.18, 120.78, 113.68, 110.77, 81.45, 80.20, 78.86, 77.57, 65.41, 56.47, 45.70, 44.78, 42.57, 38.03, 36.08, 30.83, 29.02, 25.30, 22.07, 19.82, 19.60, 17.05.

**HRMS(ESI):**  $m/z$  calc. for  $\text{C}_{26}\text{H}_{33}\text{O}_7$   $[\text{M}+\text{H}]^+$ : 457.2226, found: 457.2227.

**mp:**  $>260^\circ\text{C}$ .

**Opt. Rot.:**  $[\alpha]_{\text{D}}^{25} = +45$  ( $c = 0.25$ , acetone).

## SUPPORTING INFORMATION

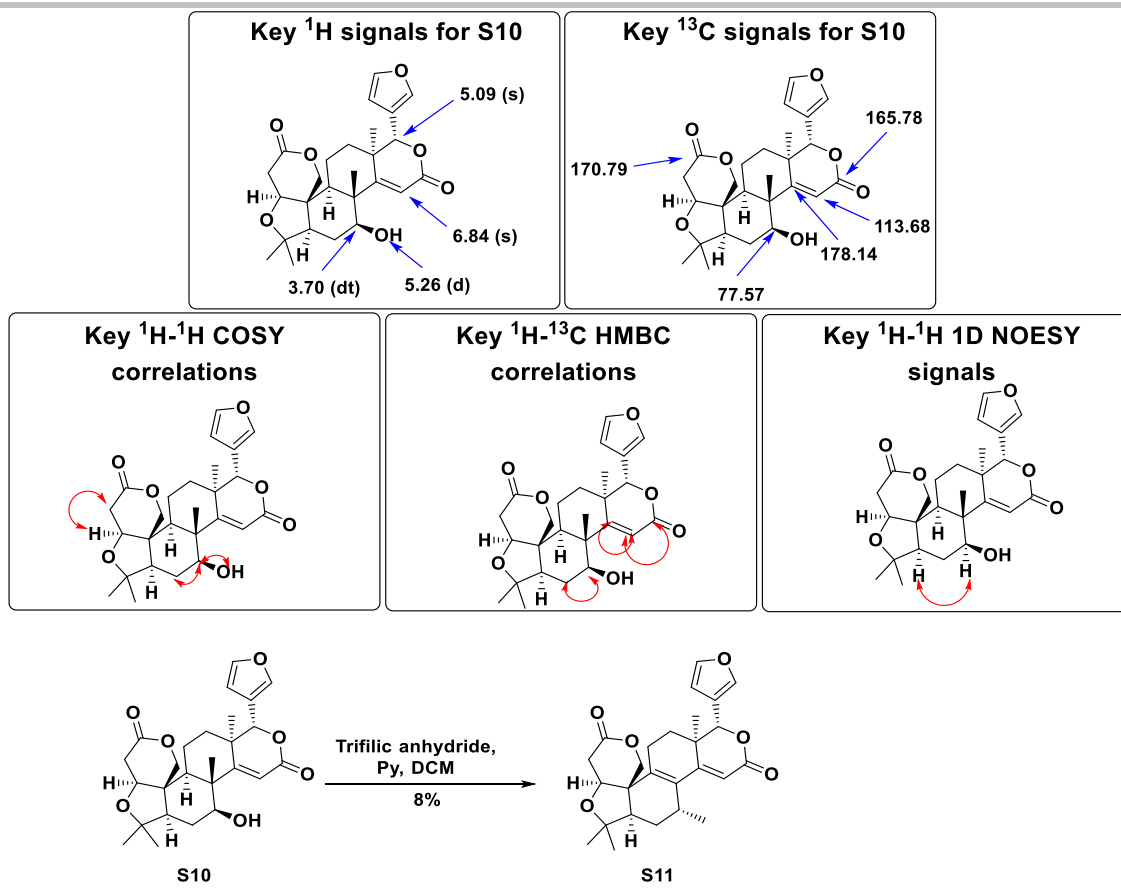

**Procedure:** Triflic anhydride (260  $\mu\text{L}$ , 1.5 mmol) was added at 0° C to a solution of **S10** (354 mg, 0.77 mmol) in dichloromethane (4 mL) and pyridine (246  $\mu\text{L}$ ) and the resulting mixture was stirred at 30° C for 12 h. The reaction was quenched with iced water and extracted three times with dichloromethane. The organic layers were combined, washed with brine, dried over  $\text{Na}_2\text{SO}_4$ , and concentrated by distillation under reduced pressure. The crude residue was purified by silica gel flash chromatography (hexane-ethyl acetate 4:6) to provide **S11** (28 mg, 8%) as a white solid.

**$^1\text{H}$  NMR ( $\text{CDCl}_3$ , 500 MHz):**  $\delta$  7.48 (d,  $J$  = 1.8 Hz, 1H), 7.44 (dd,  $J$  = 1.8, 1.8 Hz, 1H), 6.42 (d,  $J$  = 1.8 Hz, 1H), 5.94 (s, 1H), 5.11 (s, 1H), 4.59 (d,  $J$  = 12.6 Hz, 1H), 4.31 (t,  $J$  = 3.2 Hz, 1H), 4.03 (d,  $J$  = 12.6 Hz, 1H), 2.98 (dd,  $J$  = 17.1, 3.2 Hz, 1H), 2.91 (dd,  $J$  = 7.6, 7.0 Hz, 1H), 2.81 (dd,  $J$  = 17.2, 3.2 Hz, 1H), 2.37 – 2.28 (m, 2H), 2.25 – 2.19 (m, 1H), 2.19 – 2.12 (m, 1H), 1.54 – 1.48 (m, 1H), 1.47 – 1.34 (m, 2H), 1.29 (d,  $J$  = 7.6 Hz, 3H), 1.27 (s, 3H), 1.18 (s, 3H), 1.02 (s, 3H).

**$^{13}\text{C}$  NMR ( $\text{CDCl}_3$ , 125 MHz):**  $\delta$  169.93, 165.76, 157.82, 147.20, 143.16, 141.27, 133.58, 119.84, 111.24, 109.94, 80.38, 80.25, 74.22, 66.65, 54.75, 49.27, 37.16, 36.15, 30.40 (2C), 28.96, 26.74, 25.44, 23.32, 23.20, 16.46.

**HRMS(ESI):**  $m/z$  calc. for  $\text{C}_{26}\text{H}_{31}\text{O}_6$  [ $\text{M}+\text{H}$ ] $^+$ : 439.2121, found: 439.2123.

**Opt. Rot.:**  $[\alpha]_{\text{D}}^{25} = -15$  ( $c$  = 0.03, acetone/chloroform).

## SUPPORTING INFORMATION

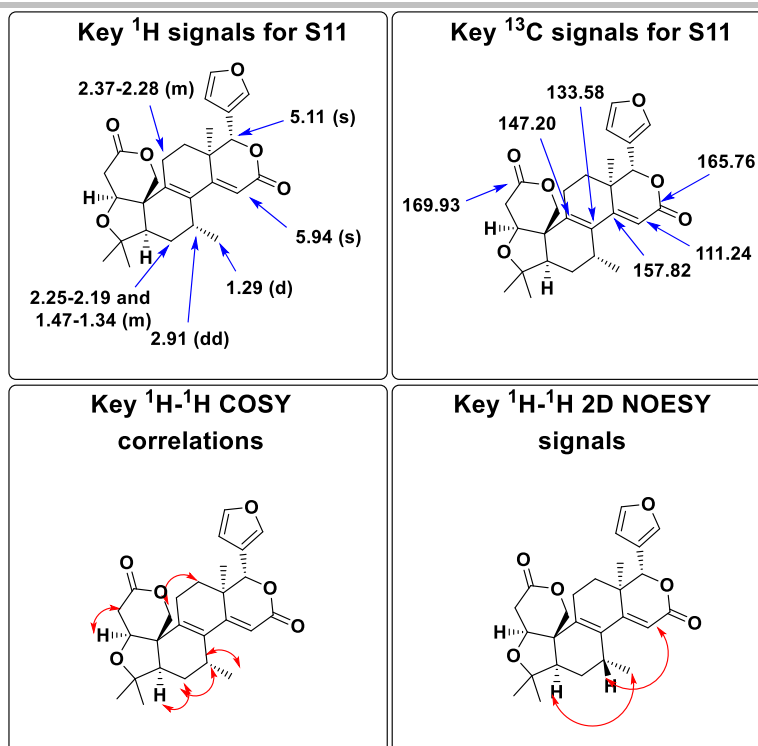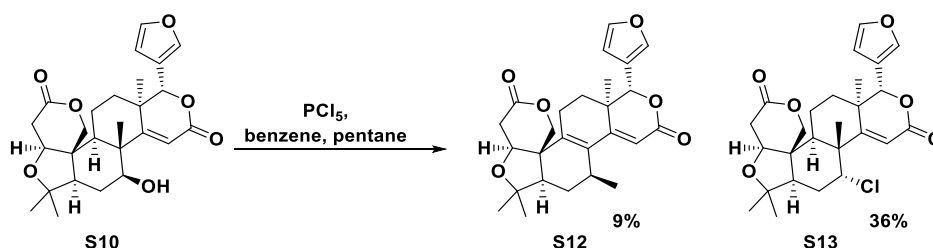

**Procedure:**  $\text{PCl}_5$  (200 mg, 0.96 mmol) was added to a solution of **S10** (220 mg, 0.48 mmol) in dry benzene (8 mL) and pentene (8 mL) and the resulting solution was stirred at 30° C for 24 h. Water was added and the aqueous layer was extracted three times with dichloromethane. The organic layers were combined, washed with brine, dried over  $\text{Na}_2\text{SO}_4$ , and concentrated by distillation under reduced pressure. The crude residue was purified by silica gel flash chromatography (hexane-ethyl acetate 4:6) to provide **S12** (20 mg, 9%) and **S13** (84 mg, 36%) as white solids.

**S12** (20 mg, 9%)

**$^1\text{H NMR}$  (DMSO- $d_6$ , 500 MHz):**  $\delta$  7.76 (d,  $J = 1.8$  Hz, 1H), 7.72 (dd,  $J = 1.8, 1.8$  Hz, 1H), 6.57 (d,  $J = 1.8$  Hz, 1H), 5.79 (s, 1H), 5.25 (s, 1H), 4.41 (d,  $J = 3.4$  Hz, 1H), 4.41 (d,  $J = 13.1$  Hz, 1H), 4.14 (d,  $J = 13.1$  Hz, 1H), 3.04 (dd,  $J = 16.2, 1.6$  Hz, 1H), 2.91 – 2.83 (m, 1H), 2.67 (dd,  $J = 16.2, 3.4$  Hz, 1H), 2.60 (dd,  $J = 18.0, 5.0$  Hz, 1H), 2.38 – 2.28 (m, 1H), 2.19 – 2.11 (m, 2H), 1.52 – 1.44 (m, 1H), 1.35 – 1.28 (m, 1H), 1.27 – 1.21 (m, 1H), 1.20 (d,  $J = 7.0$  Hz, 3H), 1.18 (s, 3H), 1.03 (s, 3H), 0.97 (s, 3H).

**$^{13}\text{C NMR}$  (DMSO- $d_6$ , 125 MHz):**  $\delta$  171.17, 165.64, 158.97, 149.39, 143.90, 142.27, 132.47, 120.55, 110.70, 110.15, 79.89, 79.65, 74.64, 64.64, 53.91, 49.50, 37.03, 36.91, 30.64, 29.95, 29.01, 26.31, 25.68, 23.04, 21.91, 16.84.

**HRMS(ESI):**  $m/z$  calc. for  $\text{C}_{26}\text{H}_{31}\text{O}_6$   $[\text{M}+\text{H}]^+$ : 439.2121, found: 439.2123.

**Opt. Rot.:**  $[\alpha]_{\text{D}}^{25} = +43$  ( $c = 0.05$ , acetone/chloroform).

## SUPPORTING INFORMATION

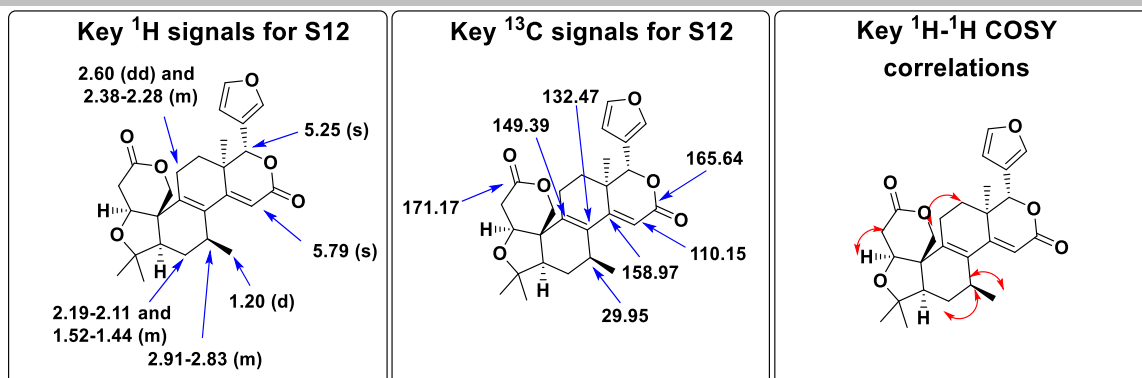

**S13** (84 mg, 36%)

**$^1\text{H}$  NMR (DMSO- $d_6$ , 500 MHz):**  $\delta$  7.72 (d,  $J$  = 1.8 Hz, 1H), 7.70 (dd,  $J$  = 1.8, 1.8 Hz, 1H), 6.53 (d,  $J$  = 1.8 Hz, 1H), 6.08 (s, 1H), 5.75 (s, 1H), 5.09 (s, 1H), 5.01 (t,  $J$  = 2.8 Hz, 1H), 4.64 (d,  $J$  = 13.2 Hz, 1H), 4.51 (d,  $J$  = 13.2 Hz, 1H), 4.13 (d,  $J$  = 2.6 Hz, 1H), 2.65 – 2.56 (m, 2H), 2.48 – 2.38 (m, 2H), 2.07 – 1.97 (m, 1H), 1.91 (dt,  $J$  = 14.4, 2.4 Hz, 1H), 1.78 – 1.66 (m, 1H), 1.53 (dt,  $J$  = 14.4, 9.9 Hz, 1H), 1.28 – 1.23 (m, 1H), 1.20 (s, 3H), 1.19 (s, 3H), 1.08 (s, 3H), 1.03 (s, 3H).

**$^{13}\text{C}$  NMR (DMSO- $d_6$ , 125 MHz):**  $\delta$  173.40, 170.14, 164.82, 143.33, 141.71, 120.17, 115.08, 110.33, 80.92, 79.65, 78.76, 67.26, 65.36, 52.18, 46.72, 45.64, 38.73, 37.27, 35.54, 30.16, 26.77, 26.39, 25.10, 21.59, 16.85, 15.64.

**HRMS(ESI):**  $m/z$  calc. for  $\text{C}_{26}\text{H}_{32}\text{O}_6\text{Cl}$   $[\text{M}+\text{H}]^+$ : 475.1887, found: 475.1889.

**mp:** >260° C.

**Opt. Rot.:**  $[\alpha]_D^{25} = -7$  ( $c$  = 0.14, acetone).

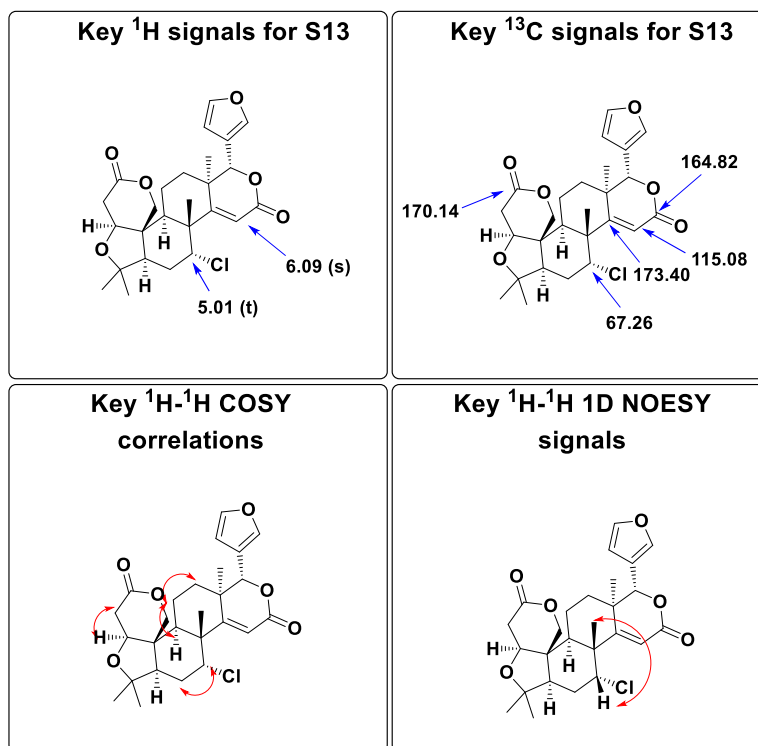

## SUPPORTING INFORMATION

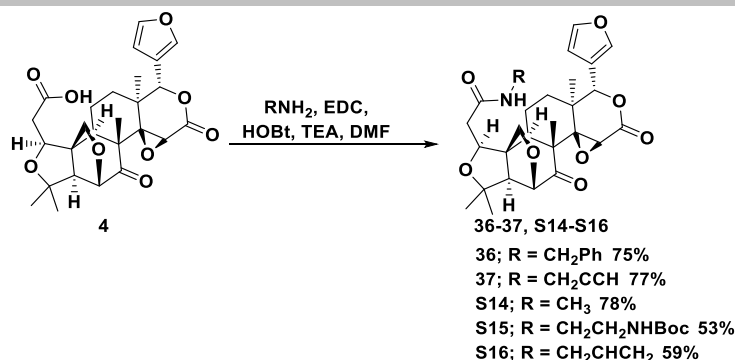

**Procedure:** HOBt (75 mg, 0.49 mmol), EDC (95  $\mu$ L, 0.53 mmol) and TEA (124  $\mu$ L, 0.89 mmol) were added to a solution of **4** (215 mg, 0.445 mmol) in DMF (1.5 mL), and the resulting mixture was stirred 30 minutes at 30° C. Then, the suitable amine (0.49 mmol) was added to the mixture and the reaction was stirred overnight. The reaction was diluted with dichloromethane and washed with water, 5% citric acid, brine, 5% NaHCO<sub>3</sub>, and Brine. The organic layer was dried over Na<sub>2</sub>SO<sub>4</sub>, concentrated by distillation at reduced pressure, and the residue was purified by flash chromatography on silica gel (hexane-ethyl acetate 7:3), giving **36-37, S14-S16** (53-78%) as white solids.

**36** (196 mg, 75%)

**<sup>1</sup>H NMR (CDCl<sub>3</sub>, 500 MHz):**  $\delta$  7.42 (d,  $J$  = 1.7 Hz, 1H), 7.41 (dd,  $J$  = 1.7, 1.7 Hz, 1H), 7.34 - 7.31 (m, 2H), 7.28 - 7.23 (m, 3H), 6.61 (t,  $J$  = 5.8 Hz, 1H), 6.29 (d,  $J$  = 1.7 Hz, 1H), 5.73 (s, 1H), 5.12 (s, 1H), 4.51 (dd,  $J$  = 15.0, 5.8 Hz, 1H), 4.39 (dd,  $J$  = 15.0, 5.8 Hz, 1H), 4.26 (s, 1H), 4.22 (dd,  $J$  = 10.1, 1.7 Hz, 1H), 4.08 (d,  $J$  = 9.0 Hz, 1H), 3.86 (d,  $J$  = 9.0 Hz, 1H), 2.71 (t,  $J$  = 9.5 Hz, 1H), 2.54 (dd,  $J$  = 14.9, 1.7 Hz, 1H), 2.29 (dd,  $J$  = 14.9, 10.1 Hz, 1H), 2.05 (s, 1H), 1.94 - 1.88 (m, 2H), 1.80 - 1.73 (m, 1H), 1.66 (s, 3H), 1.51 - 1.46 (m, 1H), 1.32 (s, 3H), 1.28 (s, 3H), 1.26 (s, 3H).

**<sup>13</sup>C NMR (CDCl<sub>3</sub>, 125 MHz):**  $\delta$  205.93, 169.84, 167.92, 143.25, 141.36, 138.09, 128.68 (2C), 127.50, 127.47 (2C), 120.31, 109.63, 85.22, 79.57, 77.80, 77.24, 71.31, 66.78, 66.07, 58.35, 57.04, 47.71, 43.57, 42.92, 40.90, 40.07, 30.65, 25.58, 24.92, 20.81, 19.09, 18.48.

**HRMS(ESI):**  $m/z$  calc. for C<sub>33</sub>H<sub>38</sub>NO<sub>8</sub> [M+H]<sup>+</sup>: 576.2597, found: 576.2593.

**mp:** 111-113° C.

**Opt. Rot.:**  $[\alpha]_D^{25}$  = - 11 (c = 0.18, acetone).

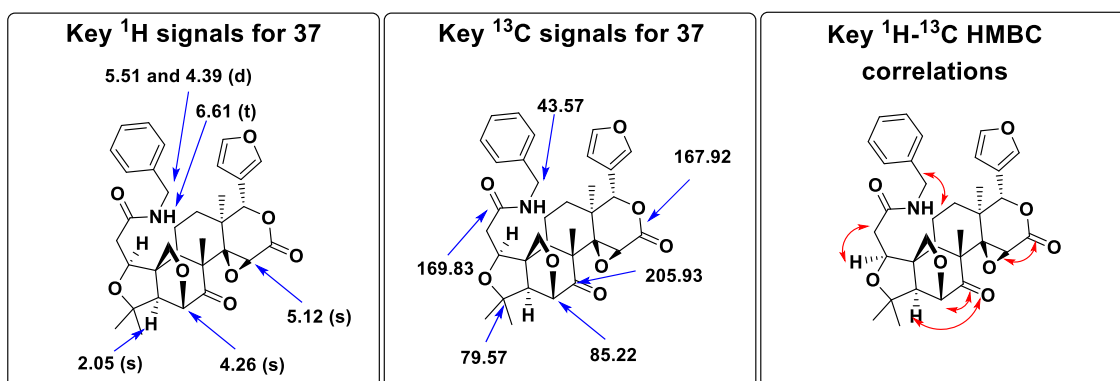

**37** (179 mg, 77%)

**<sup>1</sup>H NMR (DMSO-*d*<sub>6</sub>, 500 MHz):**  $\delta$  8.25 (t,  $J$  = 5.5 Hz, 1H), 7.71 (d,  $J$  = 1.7 Hz, 1H), 7.68 (dd,  $J$  = 1.7, 1.7 Hz, 1H), 6.51 (d,  $J$  = 1.7 Hz, 1H), 5.70 (s, 1H), 4.81 (s, 1H), 4.26 (dd,  $J$  = 9.5, 2.2 Hz, 1H), 4.18 (s, 1H), 4.10 (d,  $J$  = 9.0 Hz, 1H), 3.89 (ddd,  $J$  = 17.5, 5.5, 2.5 Hz, 1H), 3.81 (ddd,  $J$  = 17.5, 5.5, 2.5 Hz, 1H), 3.69 (d,  $J$  = 9.0 Hz, 1H), 3.08 (t,  $J$  = 2.5 Hz, 1H), 2.82 (dd,  $J$  = 12.5, 6.0 Hz, 1H), 2.77 (s, 1H), 2.32 (dd,  $J$  = 14.7, 2.2 Hz, 1H), 2.11 (dd,  $J$  = 14.7, 9.5 Hz, 1H), 1.90 - 1.68 (m, 3H), 1.54 (s, 3H), 1.28 (s, 3H), 1.21 (s, 3H), 1.19 - 1.15 (m, 1H), 1.18 (s, 3H).

**<sup>13</sup>C NMR (DMSO-*d*<sub>6</sub>, 125 MHz):**  $\delta$  207.22, 169.67, 168.41, 143.87, 142.28, 121.00, 110.67, 85.41, 81.60, 78.65, 78.01, 76.76, 73.50, 71.91, 66.46, 63.90, 57.92, 57.38, 47.35, 41.22, 40.08, 38.83, 30.62, 28.30, 25.75, 25.52, 20.33, 19.88, 17.72.

**HRMS(ESI):**  $m/z$  calc. for C<sub>29</sub>H<sub>34</sub>NO<sub>8</sub> [M+H]<sup>+</sup>: 524.2284, found: 524.2276.

**mp:** 138-139° C.

**Opt. Rot.:**  $[\alpha]_D^{25}$  = - 70 (c = 0.17, acetone).

## SUPPORTING INFORMATION

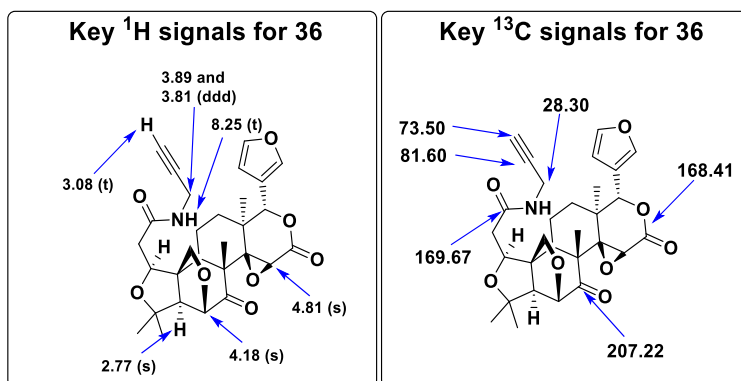

**S14** (177 mg, 78%)

**<sup>1</sup>H NMR (DMSO-*d*<sub>6</sub>, 500 MHz):** δ 7.79 (d, *J* = 4.7 Hz, 1H), 7.77 (d, *J* = 1.7 Hz, 1H), 7.73 (dd, *J* = 1.7, 1.7 Hz, 1H), 6.57 (d, *J* = 1.7 Hz, 1H), 5.76 (s, 1H), 4.87 (s, 1H), 4.32 (dd, *J* = 9.7, 2.2 Hz, 1H), 4.23 (s, 1H), 4.16 (d, *J* = 9.0 Hz, 1H), 3.74 (d, *J* = 9.0 Hz, 1H), 2.88 (dd, *J* = 12.6, 6.1 Hz, 1H), 2.83 (s, 1H), 2.61 (d, *J* = 4.7 Hz, 3H), 2.34 (dd, *J* = 14.6, 2.2 Hz, 1H), 2.11 (dd, *J* = 14.6, 9.7 Hz, 1H), 1.97 – 1.75 (m, 3H), 1.59 (s, 3H), 1.34 (s, 3H), 1.27 (s, 3H), 1.25 – 1.20 (m, 1H), 1.23 (s, 3H).

**<sup>13</sup>C NMR (DMSO-*d*<sub>6</sub>, 125 MHz):** δ 207.22, 170.28, 168.41, 143.87, 142.29, 121.00, 110.67, 85.41, 78.61, 78.00, 76.92, 71.89, 66.46, 65.82, 63.93, 57.89, 57.38, 47.35, 41.27, 39.09, 30.65, 25.97, 25.77, 25.54, 20.33, 19.88, 17.73.

**HRMS(ESI):** *m/z* calc. for C<sub>27</sub>H<sub>34</sub>NO<sub>8</sub> [M+H]<sup>+</sup>: 500.2284, found: 500.2282.

**mp:** 151-152° C.

**Opt. Rot.:** [α]<sub>D</sub><sup>25</sup> = - 88 (c = 0.13, acetone).

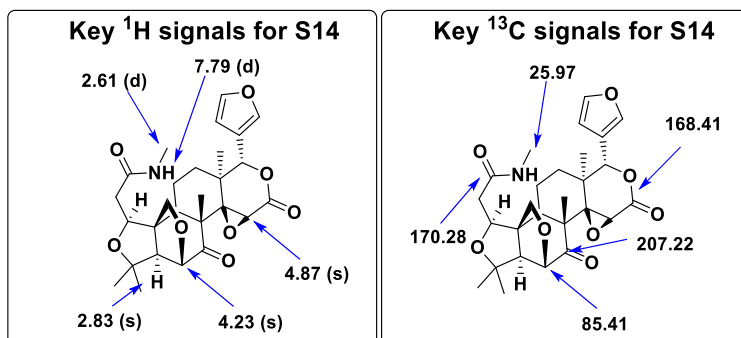

**S15** (149 mg, 53%)

**<sup>1</sup>H NMR (DMSO-*d*<sub>6</sub>, 500 MHz):** δ 7.81 (t, *J* = 5.5 Hz, 1H), 7.72 (s, 1H), 7.68 (s, 1H), 6.69 (t, *J* = 5.5 Hz, 1H), 6.51 (s, 1H), 5.71 (s, 1H), 4.81 (s, 1H), 4.26 (d, *J* = 10.1 Hz, 1H), 4.18 (s, 1H), 4.10 (d, *J* = 8.8 Hz, 1H), 3.70 (d, *J* = 8.8 Hz, 1H), 3.09 (p, *J* = 6.2 Hz, 1H), 3.06 – 2.99 (m, 1H), 2.99 – 2.94 (m, 2H), 2.85 – 2.79 (m, 1H), 2.77 (br s, 1H), 2.31 (d, *J* = 14.7 Hz, 1H), 2.07 (dd, *J* = 14.7, 10.1 Hz, 1H), 1.87 – 1.79 (m, 2H), 1.77 – 1.70 (m, 1H), 1.54 (s, 3H), 1.37 (s, 9H), 1.29 (s, 3H), 1.22 (s, 3H), 1.20 – 1.58 (m, 1H), 1.18 (s, 3H).

**<sup>13</sup>C NMR (DMSO-*d*<sub>6</sub>, 125 MHz):** δ 207.21, 170.07, 168.41, 156.02, 143.87, 142.29, 120.99, 110.66, 85.42, 78.61, 78.17, 78.00, 76.79, 71.90, 66.46, 63.91, 60.23, 57.93, 57.38, 55.39, 47.35, 41.24, 40.59, 39.17, 30.60, 28.69 (3C), 25.74, 25.51, 20.34, 19.89, 17.75.

**HRMS(ESI):** *m/z* calc. for C<sub>33</sub>H<sub>45</sub>N<sub>2</sub>O<sub>10</sub> [M+H]<sup>+</sup>: 629.3074, found: 629.3073.

**mp:** 139-140° C.

**Opt. Rot.:** [α]<sub>D</sub><sup>25</sup> = - 74 (c = 0.21, acetone).



## SUPPORTING INFORMATION

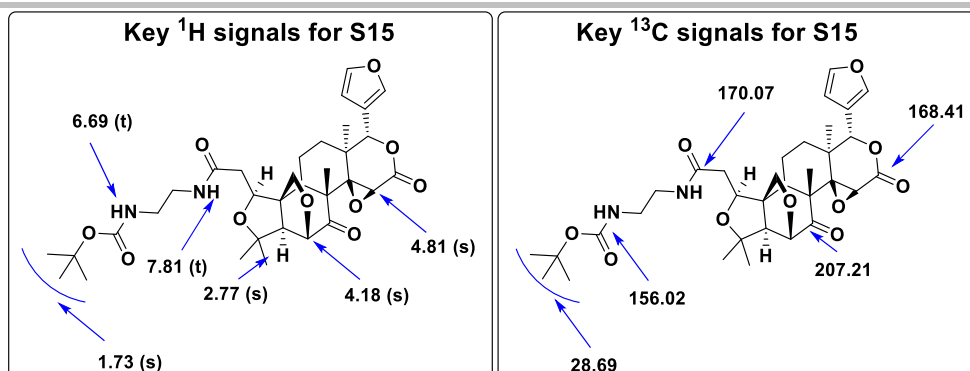

**S16** (138 mg, 59%)

**$^1\text{H}$  NMR (DMSO- $d_6$ , 500 MHz):**  $\delta$  7.95 (t,  $J$  = 5.8 Hz, 1H), 7.70 (d,  $J$  = 1.7 Hz, 1H), 7.67 (dd,  $J$  = 1.7, 1.7 Hz, 1H), 6.50 (d,  $J$  = 1.7 Hz, 1H), 5.82 – 5.70 (m, 1H), 5.69 (s, 1H), 5.15 (ddd,  $J$  = 17.2, 3.5, 1.8 Hz, 1H), 5.02 (ddd,  $J$  = 10.3, 3.5, 1.7 Hz, 1H), 4.80 (s, 1H), 4.26 (dd,  $J$  = 9.8, 2.2 Hz, 1H), 4.17 (s, 1H), 4.09 (d,  $J$  = 8.9 Hz, 1H), 3.74 – 3.68 (m, 1H), 3.70 (d,  $J$  = 8.9 Hz, 1H), 3.68 – 3.59 (m, 1H), 2.81 (dd,  $J$  = 12.5, 5.9 Hz, 1H), 2.76 (s, 1H), 2.33 (dd,  $J$  = 14.5, 2.2 Hz, 1H), 2.12 (dd,  $J$  = 14.5, 9.8 Hz, 1H), 1.89 – 1.69 (m, 3H), 1.53 (s, 3H), 1.27 (s, 3H), 1.21 (s, 3H), 1.18 – 1.15 (m, 1H), 1.17 (s, 3H).

**$^{13}\text{C}$  NMR (DMSO- $d_6$ , 125 MHz):**  $\delta$  207.25, 169.78, 168.42, 143.87, 142.28, 135.69, 121.00, 115.37, 110.66, 85.42, 78.57, 78.01, 76.93, 71.92, 66.48, 63.93, 57.95, 57.38, 47.36, 41.23, 40.60, 40.56, 39.16, 30.62, 25.75, 25.53, 20.33, 19.88, 17.74.

**HRMS(ESI):**  $m/z$  calc. for  $\text{C}_{29}\text{H}_{36}\text{NO}_8$   $[\text{M}+\text{H}]^+$ : 526.2441, found: 526.2453.

**mp:** 135-136° C.

**Opt. Rot.:**  $[\alpha]_{\text{D}}^{25}$  = - 86 ( $c$  = 0.15, acetone).

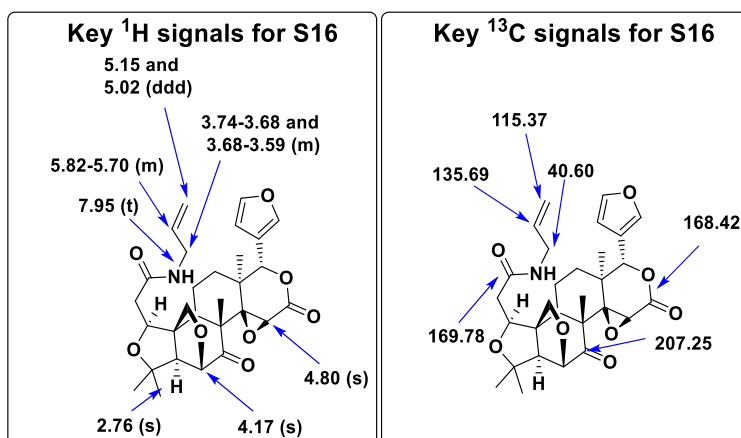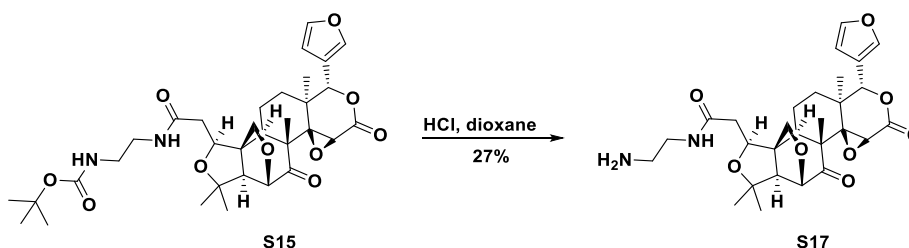

**Procedure:** Hydrochloric acid 4M in dioxane (1.5 mL) was added to a solution of **S15** (126 mg, 0.19 mmol) in dioxane (1.5 mL) and the resulting solution was stirred at 30° C for 2 h. The solvent was evaporated and the residue triturated 3 times with hexane and diethyl ether to get a white solid that was further purified by biotage (water-acetonitrile gradient with 1% formic acid) to provide **S17** (27 mg, 27%) as a white solid.

**Note:** **S17** was obtained as a formic acid salt

**$^1\text{H}$  NMR (DMSO- $d_6$ , 500 MHz):**  $\delta$  8.28 (s, 1H), 7.94 (t,  $J$  = 5.6 Hz, 1H), 7.64 (d,  $J$  = 1.7 Hz, 1H), 7.61 (dd,  $J$  = 1.7, 1.8 Hz, 1H), 7.30 (s, 1H), 6.44 (d,  $J$  = 1.8 Hz, 1H), 5.63 (s, 1H), 4.74 (s, 1H), 4.19 (dd,  $J$  = 9.6, 2.3 Hz, 1H), 4.11 (s, 1H), 4.03 (d,  $J$  = 8.9 Hz, 1H), 3.63 (d,  $J$  = 8.9 Hz, 1H), 3.10 (ddd,  $J$  = 12.3, 6.4, 6.4 Hz, 1H), 3.03 (ddd,  $J$  = 12.3, 6.4, 6.4 Hz, 1H), 2.75 (dd,  $J$  = 12.5, 6.0 Hz, 1H), 2.70 (s, 1H),

## SUPPORTING INFORMATION

2.60 (t,  $J = 6.4$  Hz, 2H), 2.26 (dd,  $J = 14.6, 2.3$  Hz, 1H), 2.01 (dd,  $J = 14.6, 9.6$  Hz, 1H), 1.83 – 1.64 (m, 3H), 1.47 (s, 3H), 1.21 (s, 3H), 1.14 (s, 3H), 1.10 (s, 3H), 1.10 – 1.08 (m, 1H).

**$^{13}\text{C}$  NMR (DMSO- $d_6$ , 125 MHz):**  $\delta$  207.21, 170.31, 168.41, 165.38 (HCOH), 143.87, 142.29, 128.80, 120.99, 110.66, 85.41, 78.60, 77.99, 76.80, 71.90, 66.47, 63.91, 57.92, 57.38, 47.35, 41.23, 40.59, 40.57, 39.14, 30.61, 25.75, 25.52, 20.33, 19.89, 17.74.

**HRMS(ESI):**  $m/z$  calc. for  $\text{C}_{28}\text{H}_{37}\text{N}_2\text{O}_8$   $[\text{M}+\text{H}]^+$ : 529.2550, found: 529.2549.

**mp:** 203-204° C.

**Opt. Rot.:**  $[\alpha]_{\text{D}}^{25} = -160$  ( $c = 0.04$ , acetone).

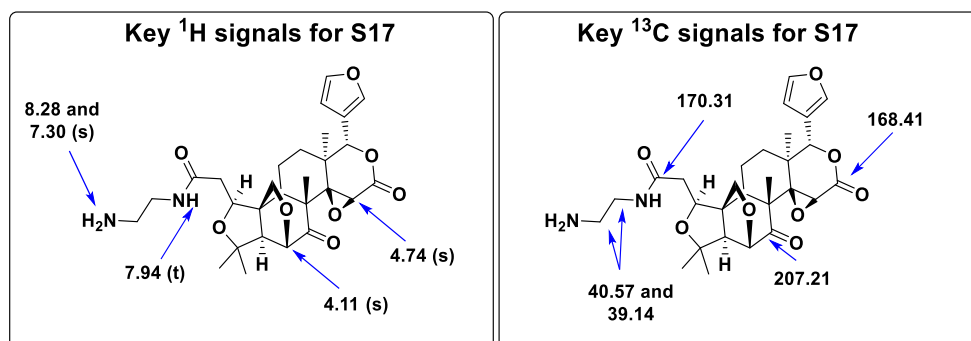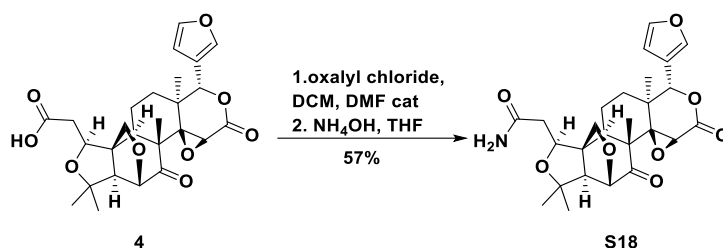

**Procedure:** Oxalyl chloride (10  $\mu\text{L}$ , 0.113 mmol) was added dropwise to a solution of **4** (50 mg, 0.103 mmol) in dichloromethane (1 mL). Then, a drop of DMF was added to the resulting solution and the mixture was stirred at 30° C for 3 h. The solvent was removed under vacuum and the crude residue was taken up in tetrahydrofuran (1 mL) and cooled to 0° C. Ammonium hydroxide (0.2 mL) was added dropwise to the resulting solution and the reaction mixture was stirred at 30° C for additional 12 h. Tetrahydrofuran was evaporated and the aqueous solution was slowly acidified to pH 2 with 0.5 M hydrochloric acid and extracted three times with dichloromethane. The organic layers were combined, washed with brine, dried over  $\text{Na}_2\text{SO}_4$ , and concentrated by distillation under reduced pressure. The crude residue was purified by silica gel flash chromatography (ethyl acetate) to provide **S18** (20 mg, 57%) as a white solid.

**$^1\text{H}$  NMR (DMSO- $d_6$ , 500 MHz):**  $\delta$  7.71 (d,  $J = 1.7$  Hz, 1H), 7.67 (dd,  $J = 1.9, 1.7$  Hz, 1H), 7.27 (d,  $J = 3.2$  Hz, 1H), 6.80 (d,  $J = 3.2$  Hz, 1H), 6.51 (d,  $J = 1.9$  Hz, 1H), 5.70 (s, 1H), 4.80 (s, 1H), 4.25 (dd,  $J = 9.7, 2.2$  Hz, 1H), 4.17 (s, 1H), 4.09 (d,  $J = 9.0$  Hz, 1H), 3.69 (d,  $J = 9.0$  Hz, 1H), 2.81 (dd,  $J = 12.6, 6.1$  Hz, 1H), 2.76 (s, 1H), 2.25 (dd,  $J = 14.7, 2.2$  Hz, 1H), 2.04 (dd,  $J = 14.7, 9.7$  Hz, 1H), 1.89 – 1.69 (m, 3H), 1.53 (s, 3H), 1.27 (s, 3H), 1.22 (s, 3H), 1.19 – 1.16 (m, 1H), 1.17 (s, 3H).

**$^{13}\text{C}$  NMR (DMSO- $d_6$ , 125 MHz):**  $\delta$  207.24, 172.04, 168.41, 143.87, 142.29, 121.00, 110.67, 85.42, 78.53, 78.01, 76.96, 71.91, 66.47, 63.93, 57.90, 57.38, 56.49, 47.35, 41.26, 38.92, 30.64, 25.54, 20.31, 19.88, 19.04, 17.72.

**HRMS(ESI):**  $m/z$  calc. for  $\text{C}_{26}\text{H}_{32}\text{NO}_8$   $[\text{M}+\text{H}]^+$ : 486.2128, found: 486.2127.

**mp:** 170-171° C.

**Opt. Rot.:**  $[\alpha]_{\text{D}}^{25} = -77$  ( $c = 0.15$ , acetone).

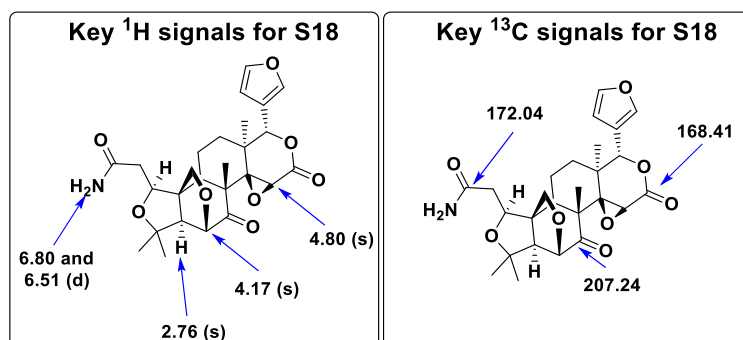

## SUPPORTING INFORMATION

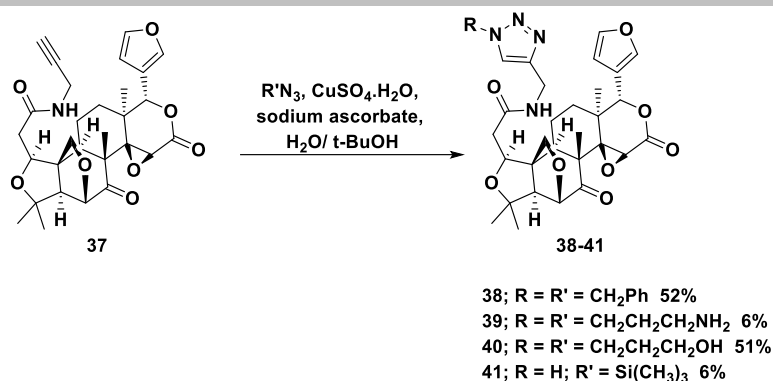

**Procedure:** Copper (II) sulfate (4 mg, 0.016 mmol) and sodium ascorbate (16 mg, 0.076 mmol) were added to a solution of **37** (400 mg, 0.76 mmol) in H<sub>2</sub>O (3.6 mL) and *t*-BuOH (1.8 mL). To the resulting suspension, the suitable azide (0.96 mmol) was added and the resulting mixture was stirred at 30° C for 48 h. The solvent was evaporated and the solution was extracted three times with dichloromethane. The combined organic layers were washed with brine, dried over Na<sub>2</sub>SO<sub>4</sub>, and concentrated by distillation at reduced pressure. The obtained residue was purified by flash chromatography on silica gel (hexane-ethyl acetate 7:3), giving **38-41** (6-52%) as white solids.

**38** (260 mg, 52%)

**<sup>1</sup>H NMR (DMSO-*d*<sub>6</sub>, 500 MHz):** δ 8.23 (t, *J* = 5.7 Hz, 1H), 7.80 (s, 1H), 7.64 (d, *J* = 1.7 Hz, 1H), 7.61 (dd, *J* = 1.7, 1.7 Hz, 1H), 7.32 – 7.23 (m, 3H), 7.23 – 7.18 (m, 2H), 6.44 (d, *J* = 1.7 Hz, 1H), 5.63 (s, 1H), 5.48 (s, 2H), 4.73 (s, 1H), 4.26 – 4.15 (m, 3H), 4.10 (s, 1H), 4.01 (d, *J* = 8.9 Hz, 1H), 3.61 (d, *J* = 8.9 Hz, 1H), 2.73 (dd, *J* = 12.5, 5.9 Hz, 1H), 2.69 (s, 1H), 2.24 (dd, *J* = 14.5, 2.3 Hz, 1H), 2.03 (dd, *J* = 14.5, 9.8 Hz, 1H), 1.81 – 1.60 (m, 3H), 1.46 (s, 3H), 1.20 (s, 3H), 1.11 (s, 3H), 1.10 – 1.07 (m, 1H), 1.07 (s, 3H).

**<sup>13</sup>C NMR (DMSO-*d*<sub>6</sub>, 125 MHz):** δ 207.21, 169.92, 168.41, 145.78, 143.87, 142.29, 136.54, 129.21 (2C), 128.58, 128.33 (2C), 123.26, 121.00, 110.67, 85.41, 78.60, 78.00, 76.91, 71.90, 66.46, 63.87, 57.93, 57.38, 53.20, 47.34, 41.21, 40.59, 39.02, 34.74, 30.61, 25.72, 25.49, 20.32, 19.88, 17.73.

**HRMS(ESI):** *m/z* calc. for C<sub>36</sub>H<sub>41</sub>N<sub>4</sub>O<sub>8</sub> [M+H]<sup>+</sup>: 657.2924, found: 657.2913.

**mp:** >260° C.

**Opt. Rot.:** [α]<sub>D</sub><sup>25</sup> = - 51 (c = 0.09, acetone).

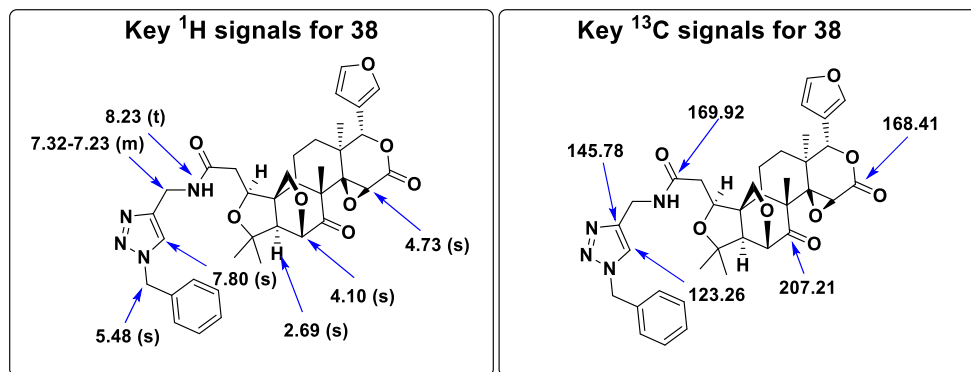

**39** (24 mg, 6%)

**Note:** **39** was purified by biotage (water-acetonitrile gradient with 1% formic acid) and was obtained as a formic acid salt

**<sup>1</sup>H NMR (DMSO-*d*<sub>6</sub>, 500 MHz):** δ 8.34 (br s, 2H), 8.24 (t, *J* = 5.7 Hz, 1H), 7.78 (s, 1H), 7.64 (d, *J* = 1.8 Hz, 1H), 7.61 (dd, *J* = 1.8, 1.8 Hz, 1H), 6.44 (d, *J* = 1.8 Hz, 1H), 5.63 (s, 1H), 4.74 (s, 1H), 4.29 (t, *J* = 7.0 Hz, 2H), 4.27 – 4.15 (m, 3H), 4.11 (s, 1H), 4.02 (d, *J* = 8.9 Hz, 1H), 3.62 (d, *J* = 8.9 Hz, 1H), 2.75 (dd, *J* = 12.3, 5.7 Hz, 1H), 2.71 (s, 1H), 2.49 (t, *J* = 6.8 Hz, 1H), 2.45 – 2.43 (m, 1H), 2.26 (dd, *J* = 14.6, 2.3 Hz, 1H), 2.06 (dd, *J* = 14.6, 9.7 Hz, 1H), 1.86 – 1.62 (m, 5H), 1.46 (s, 3H), 1.21 (s, 3H), 1.15 (s, 3H), 1.12 – 1.09 (m, 1H), 1.11 (s, 3H).

**<sup>13</sup>C NMR (DMSO-*d*<sub>6</sub>, 125 MHz):** δ 207.22, 169.94, 168.41, 165.23 (HCOH), 145.31, 143.87, 142.29, 123.31, 120.99, 110.67, 85.42, 79.64, 78.64, 78.00, 76.92, 71.90, 66.48, 63.89, 57.94, 57.37, 47.34, 47.25, 41.23, 39.00, 37.75, 34.73, 31.20, 30.65, 25.73, 25.55, 20.33, 19.88, 17.73.

**HRMS(ESI):** *m/z* calc. for C<sub>32</sub>H<sub>42</sub>N<sub>5</sub>O<sub>8</sub> [M+H]<sup>+</sup>: 624.3033, found: 624.3037.

**mp:** >260° C.

## SUPPORTING INFORMATION

Opt. Rot.:  $[\alpha]_D^{25} = -50$  (c = 0.14, acetone).

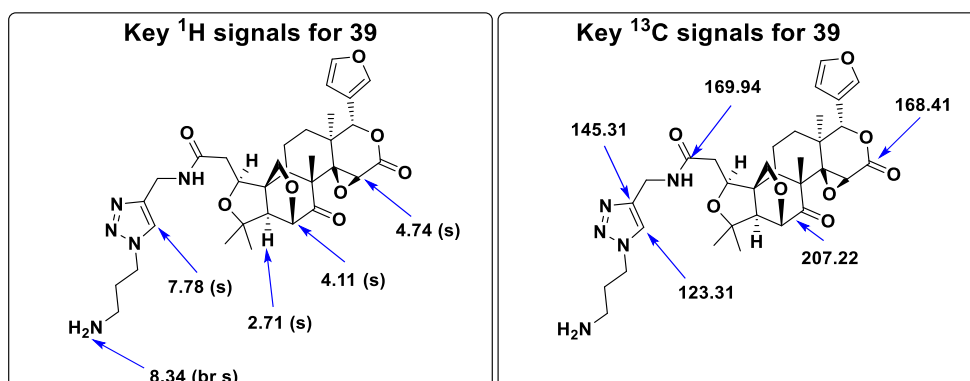

**40** (240 mg, 51%)

**$^1\text{H}$  NMR (DMSO-*d*<sub>6</sub>, 500 MHz):**  $\delta$  8.30 (t,  $J = 5.7$  Hz, 1H), 7.84 (s, 1H), 7.71 (d,  $J = 1.8$  Hz, 1H), 7.68 (dd,  $J = 1.8, 1.8$  Hz, 1H), 6.51 (d,  $J = 1.8$  Hz, 1H), 5.70 (s, 1H), 4.81 (s, 1H), 4.65 (t,  $J = 5.0$  Hz, 1H), 4.35 (t,  $J = 7.1$  Hz, 2H), 4.32 – 4.24 (m, 3H), 4.18 (s, 1H), 4.10 (d,  $J = 8.9$  Hz, 1H), 3.70 (d,  $J = 8.9$  Hz, 1H), 3.39 (q,  $J = 5.8$  Hz, 2H), 2.82 (dd,  $J = 12.3, 6.0$  Hz, 1H), 2.78 (s, 1H), 2.33 (dd,  $J = 14.6, 2.3$  Hz, 1H), 2.13 (dd,  $J = 14.6, 9.7$  Hz, 1H), 1.92 (p,  $J = 6.4$  Hz, 2H), 1.88 – 1.70 (m, 3H), 1.54 (s, 3H), 1.28 (s, 3H), 1.23 (s, 3H), 1.18 (s, 3H), 1.18 – 1.16 (m, 1H).

**$^{13}\text{C}$  NMR (DMSO-*d*<sub>6</sub>, 125 MHz):**  $\delta$  207.22, 169.90, 168.41, 145.28, 143.87, 142.29, 123.21, 120.99, 110.67, 85.42, 78.63, 78.00, 76.95, 71.90, 66.48, 63.89, 57.95, 57.87, 57.38, 55.39, 47.35, 46.98, 41.22, 39.03, 34.75, 33.48, 30.64, 25.74, 25.55, 20.34, 19.88, 17.74.

**HRMS(ESI):**  $m/z$  calc. for  $\text{C}_{32}\text{H}_{41}\text{N}_4\text{O}_9$   $[\text{M}+\text{H}]^+$ : 625.2874, found: 625.2865.

**mp:** 138–140° C.

Opt. Rot.:  $[\alpha]_D^{25} = -51$  (c = 0.12, acetone).

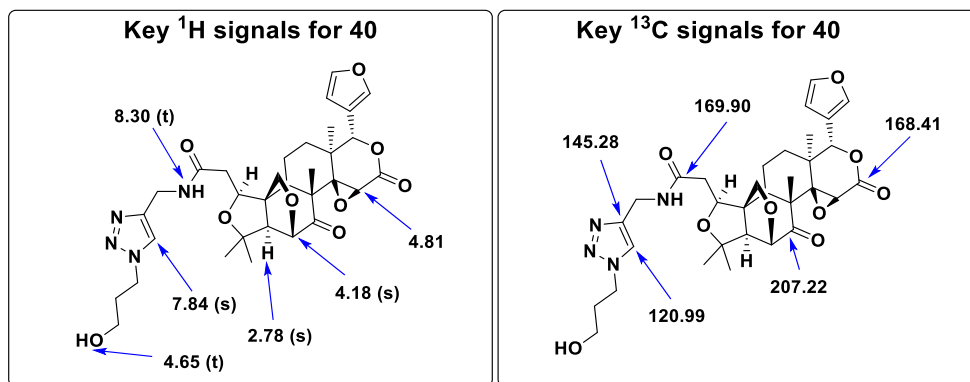

**41** (32 mg, 6%)

**Note:** Reaction was performed using trimethylsilyl azide.

**$^1\text{H}$  NMR (DMSO-*d*<sub>6</sub>, 500 MHz):**  $\delta$  14.71 (br s, 1H), 8.24 (t,  $J = 5.7$  Hz, 1H), 7.64 (d,  $J = 1.8$  Hz, 1H), 7.60 (dd,  $J = 1.8, 1.8$  Hz, 1H), 7.56 (br s, 1H), 6.44 (d,  $J = 1.8$  Hz, 1H), 5.63 (s, 1H), 4.74 (s, 1H), 4.28 – 4.19 (m, 3H), 4.11 (s, 1H), 4.03 (d,  $J = 8.9$  Hz, 1H), 3.63 (d,  $J = 8.9$  Hz, 1H), 2.75 (dd,  $J = 12.4, 5.7$  Hz, 1H), 2.71 (s, 1H), 2.28 (dd,  $J = 14.5, 2.1$  Hz, 1H), 2.06 (dd,  $J = 14.5, 9.9$  Hz, 1H), 1.80 – 1.65 (m, 3H), 1.46 (s, 3H), 1.21 (s, 3H), 1.16 (s, 3H), 1.11 (s, 3H), 1.10 – 1.07 (m, 1H).

**$^{13}\text{C}$  NMR (DMSO-*d*<sub>6</sub>, 125 MHz):**  $\delta$  207.23, 170.02, 168.41, 143.87 (2C), 142.28, 120.99 (2C), 110.66, 85.42, 78.63, 78.01, 76.96, 71.91, 66.47, 63.90, 57.95, 57.38, 47.35, 41.21, 40.50, 39.08, 34.32, 30.61, 25.73, 25.53, 20.33, 19.88, 17.74.

**HRMS(ESI):**  $m/z$  calc. for  $\text{C}_{29}\text{H}_{35}\text{N}_4\text{O}_8$   $[\text{M}+\text{H}]^+$ : 567.2455, found: 567.2459.

**mp:** 191–193° C.

Opt. Rot.:  $[\alpha]_D^{25} = -89$  (c = 0.08, acetone).

## SUPPORTING INFORMATION

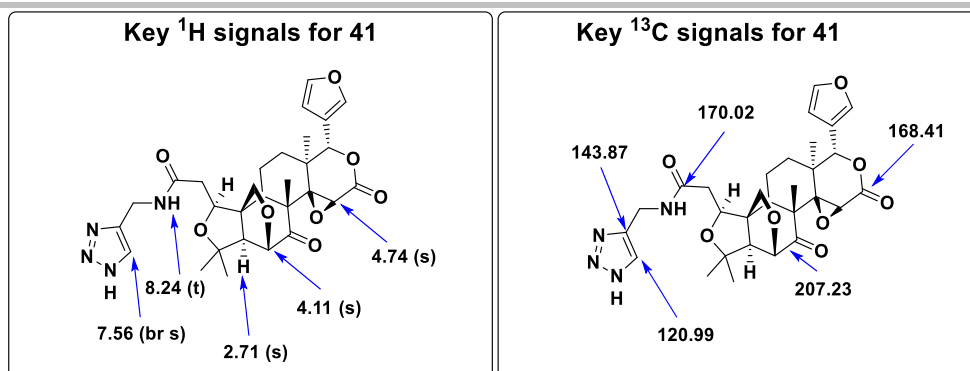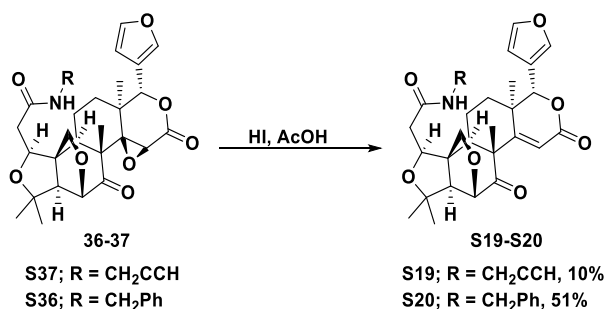

**Procedure:** A solution of the suitable amide (0.35 mmol) in acetic acid (2.8 mL) and hydriodic acid (2.8 mL) was heated under reflux for 3 h. The reaction mixture was quenched with a saturated solution of sodium sulfite and extracted three times with dichloromethane. The organic layers were combined, washed with brine, dried over Na<sub>2</sub>SO<sub>4</sub>, and concentrated by distillation under reduced pressure. The crude residue was purified by silica gel flash chromatography (hexane-ethyl acetate 4:6) to provide **S19-S20** (10-51%) as white solids.

**S19** (20 mg, 10%)

**<sup>1</sup>H NMR (CDCl<sub>3</sub>, 500 MHz):** δ 7.49 (s, 1H), 7.43 (d, *J* = 1.9 Hz, 1H), 7.12 (s, 1H), 7.09 (s, 1H), 6.81 (t, *J* = 5.9 Hz, 1H), 6.39 (d, *J* = 1.9 Hz, 1H), 5.01 (s, 1H), 4.42 (s, 1H), 4.27 (dd, *J* = 15.3, 5.9 Hz, 1H), 4.22 (dd, *J* = 10.5, 1.5 Hz, 1H), 4.12 (dd, *J* = 15.3 Hz, 5.9 Hz, 1H), 4.09 (d, *J* = 8.9 Hz, 1H), 3.92 (d, *J* = 8.9 Hz, 1H), 2.56 (dd, *J* = 15.3, 1.5 Hz, 1H), 2.51 (dd, *J* = 13.2, 6.8 Hz, 1H), 2.33 (dd, *J* = 15.3, 10.5 Hz, 1H), 2.10 (s, 1H), 2.06 – 1.85 (m, 2H), 1.73 (s, 3H), 1.68 (dd, *J* = 14.4, 9.7 Hz, 1H), 1.48 (dd, *J* = 14.4, 10.2 Hz, 1H), 1.37 (s, 3H), 1.35 (s, 3H), 1.27 (s, 3H),

**<sup>13</sup>C NMR (CDCl<sub>3</sub>, 125 MHz):** δ 205.36, 169.74, 167.87, 165.13, 143.14, 141.41, 119.91, 115.57, 109.85, 99.45, 85.68, 82.65, 81.87, 79.89, 76.30, 66.39, 65.97, 58.27, 51.04, 48.90, 41.37, 39.98, 39.11, 30.91, 25.99, 25.02, 24.85, 21.10, 18.56.

**HRMS(ESI):** *m/z* calc. for C<sub>29</sub>H<sub>34</sub>NO<sub>7</sub> [M+H]<sup>+</sup>: 508.2335, found: 508.2358.

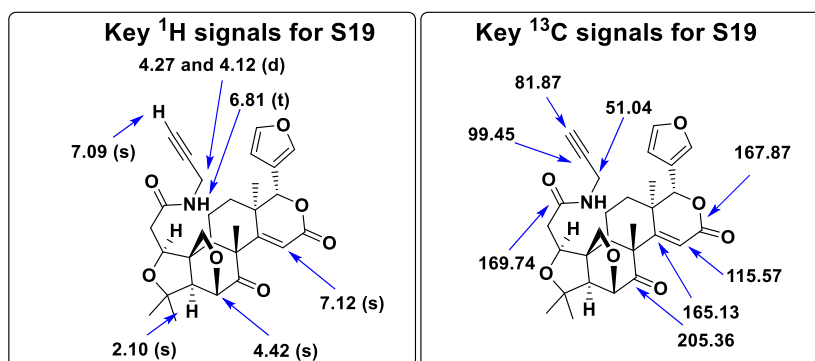

**S20** (98 mg, 51%)

**<sup>1</sup>H NMR (CDCl<sub>3</sub>, 500 MHz):** δ 7.48 (d, *J* = 1.7 Hz, 1H), 7.42 (dd, *J* = 1.7, 1.7 Hz, 1H), 7.36 - 7.30 (m, 2H), 7.28 - 7.24 (m, 3H), 7.10 (s, 1H), 6.67 (t, *J* = 6.0 Hz, 1H), 6.38 (d, *J* = 1.7 Hz, 1H), 5.00 (s, 1H), 5.51 (dd, *J* = 15.0, 6.0 Hz, 1H), 4.39 (s, 1H), 4.38 (dd, *J* = 15.0, 6.0 Hz, 1H), 4.22 (dd, *J* = 10.2, 1.7 Hz, 1H), 4.06 (d, *J* = 8.9 Hz, 1H), 3.88 (d, *J* = 8.9 Hz, 1H), 2.54 (dd, *J* = 14.9, 1.7 Hz, 1H), 2.71 (dd, *H* =

## SUPPORTING INFORMATION

13.1, 6.7 Hz, 1H), 2.29 (dd,  $J = 14.9, 10.2$  Hz, 1H), 2.09 (s, 1 H), 2.03 - 1.95 (m, 1H), 1.92 - 1.84 (m, 1H), 1.72 (s, 3H), 1.69 - 1.62 (m, 1H), 1.48 - 1.43 (m, 1H), 1.28 (s, 6H), 1.26 (s, 3H).

**$^{13}\text{C}$  NMR (CDCl<sub>3</sub>, 125 MHz):**  $\delta$  205.47, 169.93, 168.04, 165.18, 143.12, 141.40, 138.12, 128.66 (2C), 127.47, 127.44 (2C), 119.93, 115.47, 109.88, 85.70, 82.63, 79.50, 76.54, 66.40, 65.99, 58.21, 48.90, 43.54, 41.31, 40.09, 39.10, 30.55, 25.98, 24.94, 24.86, 21.06, 18.50.

**HRMS(ESI):**  $m/z$  calc. for C<sub>33</sub>H<sub>38</sub>NO<sub>7</sub> [M+H]<sup>+</sup>: 560.2648, found: 560.2644.

**mp:** 126-127° C.

**Opt. Rot.:**  $[\alpha]_{\text{D}}^{25} = -62$  ( $c = 0.17$ , acetone).

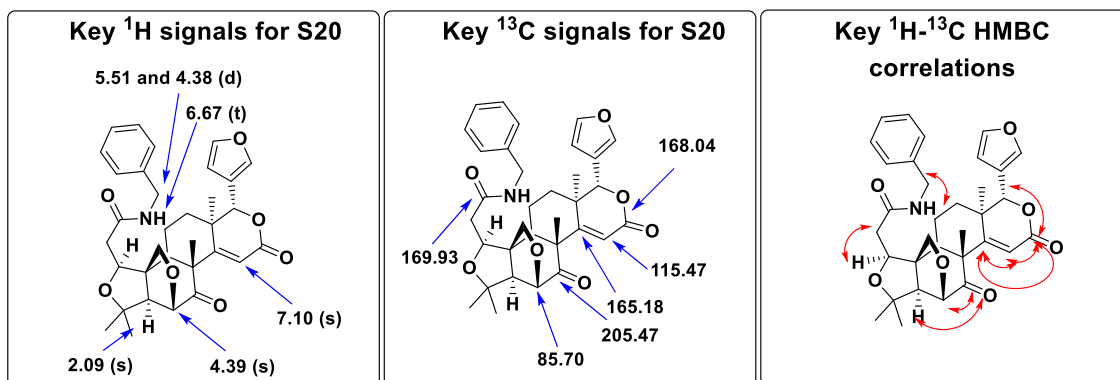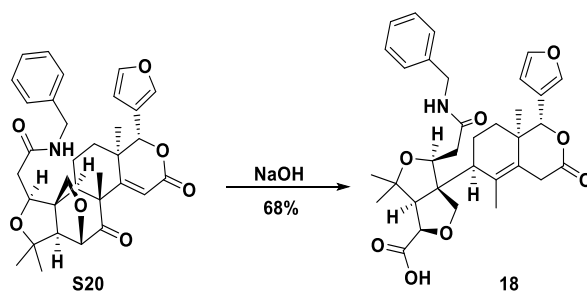

**Procedure:** A suspension of **S20** (100 mg, 0.17 mmol) in 2 M sodium hydroxide (2 mL) and dioxane (2 mL) was heated under reflux for 2 h. The reaction mixture was cooled to room temperature, and the organic solvent was evaporated under vacuum. The aqueous layer was washed with dichloromethane (to remove unreactive starting material) and acidified with 2 M hydrochloric acid. The acid aqueous solution was then extracted three times with dichloromethane. The combined organic layers (obtained by extracting the acidic layer) were washed with brine, dried over Na<sub>2</sub>SO<sub>4</sub>, and concentrated by distillation under reduced pressure to yield pure **18** (66 mg, 68%) as a white solid.

**$^1\text{H}$  NMR (DMSO-*d*<sub>6</sub>, 500 MHz):**  $\delta$  12.78 (br s, 1H), 8.37 (t,  $J = 6.0$  Hz, 1H), 7.70 (d,  $J = 1.7$  Hz, 1H), 7.60 (dd,  $J = 1.7, 1.7$  Hz, 1H), 7.26 - 7.11 (m, 5H), 6.50 (d,  $J = 1.7$  Hz, 1H), 5.03 (s, 1H), 4.35 (dd,  $J = 9.8, 1.9$  Hz, 1H), 4.26 (d,  $J = 4.0$  Hz, 1H), 4.21 (ddd,  $J = 15.5, 8.4, 6.0$  Hz, 2H), 3.79 (d,  $J = 9.6$  Hz, 1H), 3.74 (d,  $J = 9.5$  Hz, 1H), 3.37 - 3.18 (m, 2H), 2.81 (d,  $J = 4.0$  Hz, 1H), 2.43 - 2.40 (m, 1H), 2.30 (dd,  $J = 14.2, 9.8$  Hz, 1H), 2.18 (dd,  $J = 14.2, 1.9$  Hz, 1H), 1.77 - 1.67 (m, 1H), 1.61 (s, 3H), 1.61 - 1.56 (m, 1H), 1.22 (s, 6H), 1.22 - 1.15 (m, 1H), 0.85 (s, 3H), 0.85 - 0.82 (m, 1H).

**$^{13}\text{C}$  NMR (DMSO-*d*<sub>6</sub>, 125 MHz):**  $\delta$  174.29, 170.81, 170.24, 143.75, 141.94, 139.94, 131.56, 128.58 (2C), 128.15, 127.56 (2C), 127.09, 121.09, 110.58, 80.77, 80.20, 79.00, 78.08, 72.44, 61.58, 61.51, 44.64, 42.44, 38.72, 37.78, 33.67, 28.99, 27.65, 26.23, 21.55, 21.29, 18.32.

**HRMS(ESI):**  $m/z$  calc. for C<sub>33</sub>H<sub>40</sub>NO<sub>8</sub> [M+H]<sup>+</sup>: 578.2754, found: 578.2747.

**mp:** 101-102° C.

**Opt. Rot.:**  $[\alpha]_{\text{D}}^{25} = -91$  ( $c = 0.16$ , acetone).

## SUPPORTING INFORMATION

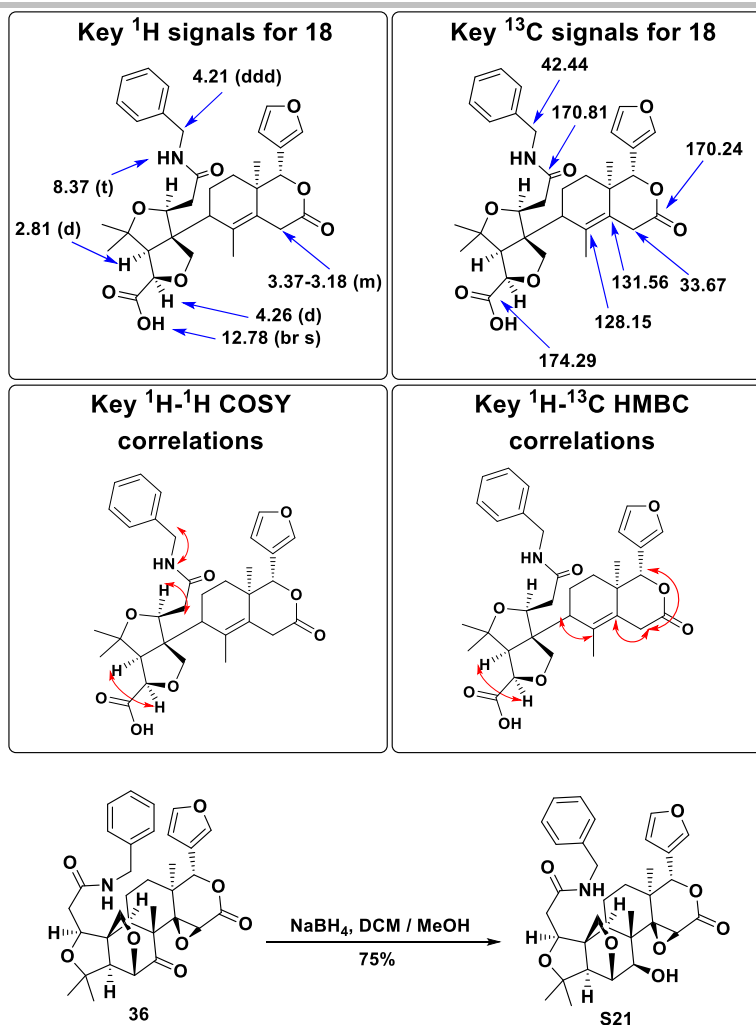

**Procedure:** A solution of  $\text{NaBH}_4$  (19 mg, 0.5 mmol) in anhydrous methanol (0.85 mL) was added to a solution of **36** (54 mg, 0.09 mmol) in dichloromethane (1.7 mL) at  $-40^\circ\text{C}$  and the resulting mixture was stirred at  $-40^\circ\text{C}$ . After 30 minutes, the reaction was quenched by the addition of a 2 M hydrochloric acid solution and extracted three times with dichloromethane. The organic layers were dried over  $\text{Na}_2\text{SO}_4$  and concentrated by distillation under reduced pressure to obtain a crude residue that was purified by silica gel flash chromatography (hexane-ethyl acetate 3:7) to provide **S21** (39 mg, 75%) as a white solid.

**$^1\text{H}$  NMR ( $\text{CDCl}_3$ , 125 MHz):**  $\delta$  7.42 (s, 1H), 7.41 (d,  $J = 1.7$  Hz, 1H), 7.33 – 7.30 (m, 2H), 7.28 – 7.23 (m, 3H), 6.74 (t,  $J = 5.7$  Hz, 1H), 6.29 (d,  $J = 1.7$  Hz, 1H), 5.70 (s, 1H), 4.51 (dd,  $J = 15.1, 5.7$  Hz, 1H), 4.37 (dd,  $J = 15.1, 5.7$  Hz, 1H), 4.19 (s, 1H), 4.16 (s, 1H), 4.14 (dd,  $J = 10.4, 1.5$  Hz, 1H), 3.93 (d,  $J = 9.0$  Hz, 1H), 3.69 (d,  $J = 9.0$  Hz, 1H), 3.49 (s, 1H), 2.53 (dd,  $J = 12.4, 6.8$  Hz, 2H), 2.48 (dd,  $J = 15.0, 1.5$  Hz, 1H), 2.22 (dd,  $J = 15.0, 10.4$  Hz, 1H), 1.89 (s, 1H), 1.87 – 1.79 (m, 1H), 1.79 – 1.68 (m, 1H), 1.54 – 1.47 (m, 1H), 1.47 (s, 3H), 1.28 (s, 3H), 1.27 (s, 3H), 1.23 (s, 3H). (38 non-exchangeable protons)

**$^{13}\text{C}$  NMR ( $\text{CDCl}_3$ , 125 MHz):**  $\delta$  170.31, 167.69, 1431.21, 141.25, 138.20, 128.65 (2C), 127.41 (3C), 120.29, 109.62, 82.97, 79.99, 78.47, 78.40, 76.60, 75.30, 66.69, 66.06, 58.29, 58.25, 43.88, 43.48, 42.60, 39.96, 39.88, 31.17, 25.41, 24.76, 20.39, 19.15, 12.68.

**HRMS(ESI):**  $m/z$  calc. for  $\text{C}_{33}\text{H}_{40}\text{NO}_8$   $[\text{M}+\text{H}]^+$ : 578.2754, found: 578.2747

**Opt. Rot.:**  $[\alpha]_{\text{D}}^{25} = +46$  ( $c = 0.14$ , acetone).

## SUPPORTING INFORMATION

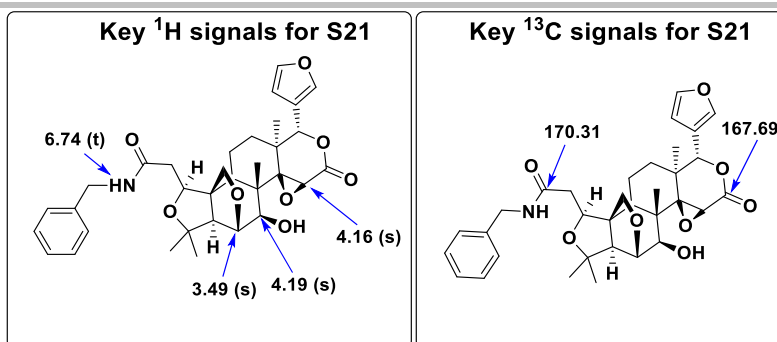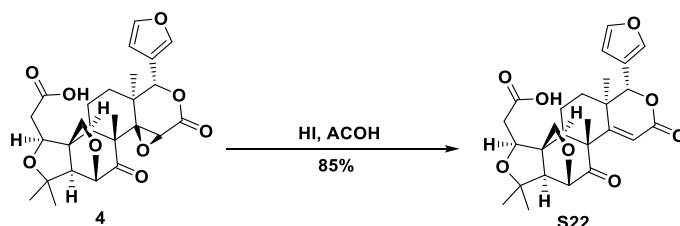**Procedure:**

A solution of **4** (300 mg, 0.62 mmol) in acetic acid (4 mL) and hydriodic acid (4 mL) was heated under reflux for 3 h. The reaction mixture was cooled to room temperature and slowly poured into 400 mL of sodium sulfite saturated solution and extracted three times with dichloromethane. The organic layers were combined, washed with brine, dried over  $\text{Na}_2\text{SO}_4$  and concentrated by distillation under reduced pressure. The crude residue was purified by biotage (water-acetonitrile gradient with 1% formic acid) to provide **S22** (110 mg, 85%) as a white solid.

**Note:** **S22** was obtained as a formic acid salt

**$^1\text{H}$  NMR (DMSO- $d_6$ , 500 MHz):**  $\delta$  12.21 (br s, 1H), 7.74 (s, 1H), 7.69 (d,  $J = 1.8$  Hz, 1H), 6.83 (s, 1H), 6.55 (d,  $J = 1.8$  Hz, 1H), 5.19 (s, 1H), 4.34 (s, 1H), 4.30 (dd,  $J = 10.2, 2.0$  Hz, 1H), 4.11 (d,  $J = 9.0$  Hz, 1H), 3.72 (d,  $J = 9.0$  Hz, 1H), 2.69 (dd,  $J = 13.3, 6.2$  Hz, 1H), 2.48 (s, 1H), 2.09 (dd,  $J = 15.6, 10.2$  Hz, 1H), 1.88 (dd,  $J = 13.3, 3.4$  Hz, 1H), 1.78 – 1.72 (m, 2H), 1.63 (s, 3H), 1.34 – 1.26 (m, 1H), 1.24 (s, 3H), 1.21 (s, 3H), 1.18 (s, 3H), 1.16 – 1.12 (m, 1H).

**$^{13}\text{C}$  NMR (DMSO- $d_6$ , 125 MHz):**  $\delta$  207.67, 172.51, 169.88, 165.31, 143.76, 142.25, 120.67, 114.19, 110.79, 85.83, 81.85, 78.70, 76.22, 66.43, 64.59, 57.63, 48.82, 40.58, 38.88, 38.05, 30.50, 25.82, 25.50, 25.04, 20.75, 17.74.

**HRMS(ESI):**  $m/z$  calc. for  $\text{C}_{26}\text{H}_{31}\text{O}_8$   $[\text{M}+\text{H}]^+$ : 471.2019, found: 471.2013.

**mp:** 173-174.

**Opt. Rot.:**  $[\alpha]_{\text{D}}^{25} = -48$  ( $c = 0.12$ , acetone).

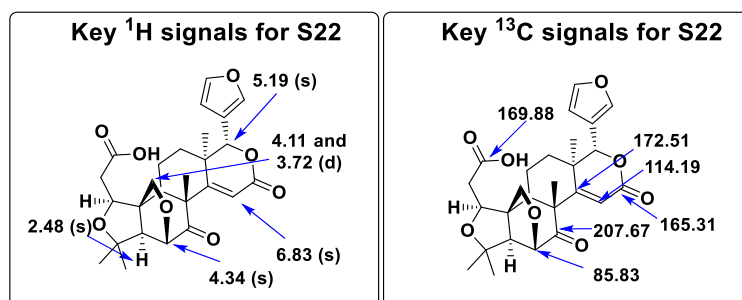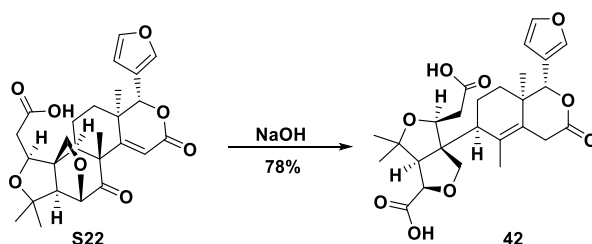



## SUPPORTING INFORMATION

**Procedure:** A suspension of **S22** (110 mg, 0.23 mmol) in 2 M sodium hydroxide (2.6 mL) was heated under reflux for 2 h. The reaction mixture was cooled to room temperature, and the organic solvent was evaporated under vacuum. The aqueous layer was washed with dichloromethane (to remove unreactive starting material) and acidified with 2 M hydrochloric acid. The acid aqueous solution was then extracted three times with dichloromethane. The combined organic layers (obtained by extracting the acidic layer) were washed with brine, dried over  $\text{Na}_2\text{SO}_4$ , and concentrated by distillation under reduced pressure. The obtained crude residue was purified by biotage (water-acetonitrile gradient with 1% formic acid) to provide **42** (88 mg, 78%) as a white solid.

**$^1\text{H}$  NMR (DMSO-*d*<sub>6</sub>, 500 MHz):**  $\delta$  12.65 (br s, 1H), 12.27 (br s, 1H), 7.70 (d,  $J$  = 1.8 Hz, 1H), 7.61 (s, 1H), 6.50 (d,  $J$  = 1.8 Hz, 1H), 4.98 (s, 1H), 4.27 (dd,  $J$  = 10.2, 1.8 Hz, 1H), 4.26 (d,  $J$  = 4.1 Hz, 1H), 3.73 (dd,  $J$  = 12.1, 9.7 Hz, 2H), 3.36 – 3.19 (m, 2H), 2.80 (d,  $J$  = 4.1 Hz, 1H), 2.43 – 2.41 (m, 1H), 2.37 (dd,  $J$  = 15.3, 1.8 Hz, 1H), 2.20 (dd,  $J$  = 15.3, 10.2 Hz, 1H), 1.69 – 1.61 (m, 2H), 1.60 (s, 3H), 1.21 (s, 3H), 1.20 (s, 3H), 1.17 – 1.11 (m, 1H), 0.87 – 0.84 (m, 1H), 0.85 (s, 3H).

**$^{13}\text{C}$  NMR (DMSO-*d*<sub>6</sub>, 125 MHz):**  $\delta$  174.24, 173.18, 170.21, 143.78, 141.90, 131.61, 128.07, 121.07, 110.57, 80.79, 80.43, 78.68, 78.00, 72.32, 61.53, 61.42, 44.64, 37.80, 37.50, 33.67, 28.96, 27.54, 26.16, 21.51, 21.37, 18.29.

**HRMS(ESI):**  $m/z$  calc. for  $\text{C}_{26}\text{H}_{33}\text{O}_9$   $[\text{M}+\text{H}]^+$ : 489.2125, found: 489.2123.

**mp:** 153–154 °C.

**Opt. Rot.:**  $[\alpha]_{\text{D}}^{25}$  = - 50 ( $c$  = 0.07, acetone).

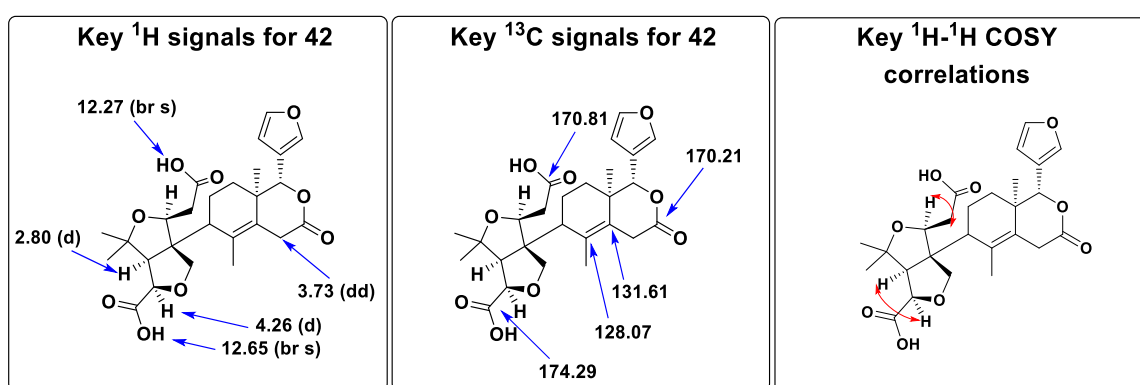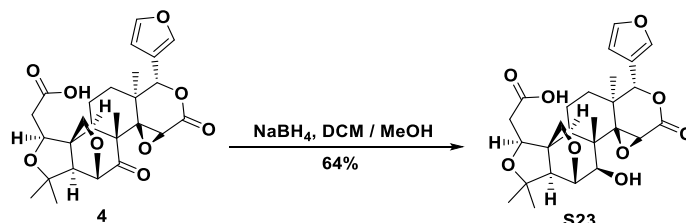

**Procedure:** A solution of  $\text{NaBH}_4$  (44 mg, 1.18 mmol) in anhydrous methanol (2 mL) was added to a solution of **4** (100 mg, 0.21 mmol) in dichloromethane (4 mL) at -40 °C and the resulting mixture was stirred at -40 °C. After 30 minutes, the reaction was quenched by the addition of a 2 M hydrochloric acid solution and extracted three times with dichloromethane. The organic layers were dried over  $\text{Na}_2\text{SO}_4$  and concentrated by distillation under reduced pressure to obtain a crude residue that was purified by biotage (water-acetonitrile gradient with 1% formic acid) to provide **S23** (65 mg, 64%) as a white solid.

**$^1\text{H}$  NMR (DMSO-*d*<sub>6</sub>, 125 MHz):**  $\delta$  12.10 (br s, 1H), 7.63 (d,  $J$  = 1.8 Hz, 1H), 7.59 (s, 1H), 6.42 (d,  $J$  = 1.8 Hz, 1H), 5.57 (s, 1H), 4.70 (d,  $J$  = 5.7 Hz, 1H), 4.10 (dd,  $J$  = 10.0, 2.1 Hz, 1H), 3.98 (s, 1H), 3.92 (s, 1H), 3.78 (d,  $J$  = 8.9 Hz, 1H), 3.50 (d,  $J$  = 5.7 Hz, 1H), 3.39 (d,  $J$  = 8.9 Hz, 1H), 2.51 – 2.44 (m, 2H), 2.36 (dd,  $J$  = 15.6, 2.1 Hz, 1H), 2.17 (s, 1H), 1.93 (dd,  $J$  = 15.6, 10.0 Hz, 1H), 1.72 – 1.60 (m, 2H), 1.60 – 1.51 (m, 1H), 1.24 (s, 3H), 1.16 (s, 3H), 1.12 (s, 3H), 1.08 (s, 3H).

**$^{13}\text{C}$  NMR (DMSO-*d*<sub>6</sub>, 125 MHz):**  $\delta$  172.69, 168.50, 143.81, 142.16, 121.10, 110.69, 83.89, 79.11, 78.50, 76.83, 76.60, 75.70, 65.89, 64.89, 57.87, 57.80, 43.59, 41.45, 39.71, 37.84, 31.28, 25.70, 25.40, 20.12, 18.49, 13.37.

**HRMS(ESI):**  $m/z$  calc. for  $\text{C}_{26}\text{H}_{33}\text{O}_9$   $[\text{M}+\text{H}]^+$ : 489.2125, found: 489.2127

**mp:** decomposes upon heating above 230 °C.

**Opt. Rot.:**  $[\alpha]_{\text{D}}^{25}$  = - 121 ( $c$  = 0.06, acetone).

## SUPPORTING INFORMATION

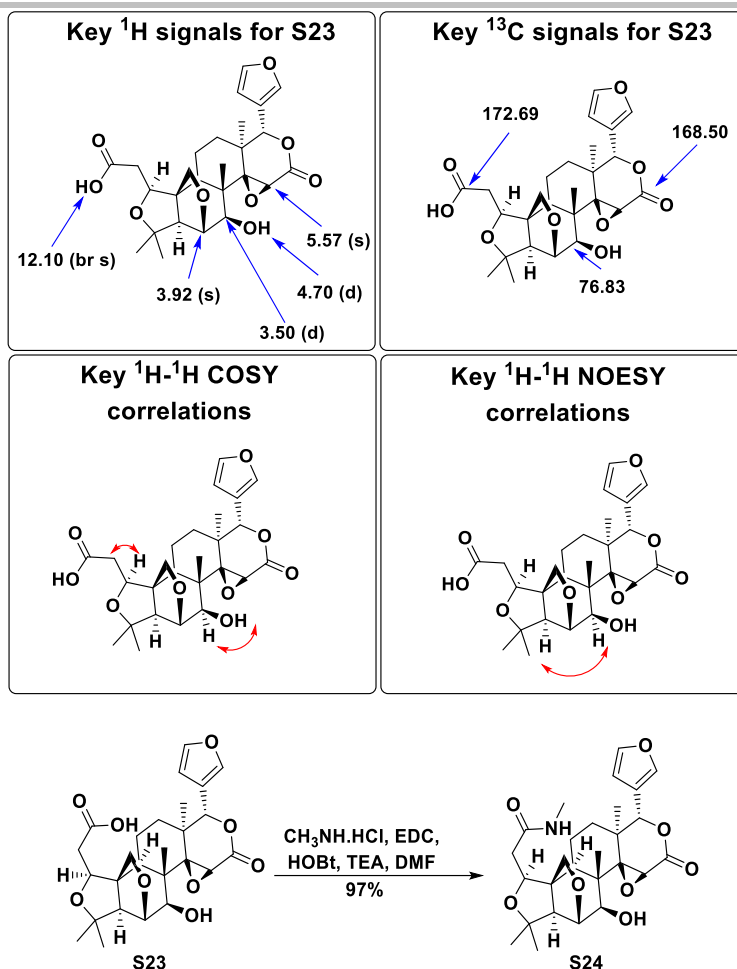

**Procedure:** HOBt (17 mg, 0.113 mmol), EDC (22  $\mu\text{L}$ , 0.122 mmol) and TEA (28  $\mu\text{L}$ , 0.204 mmol) were added to a solution of **S23** (50 mg, 0.102 mmol) in DMF (1 mL), and the resulting mixture was stirred 30 minutes at 30° C. Then, methylamine hydrochloride (0.49 mmol) was added to the mixture and the reaction was stirred overnight. The reaction was diluted with dichloromethane and washed with water, 5% citric acid, brine, 5%  $\text{NaHCO}_3$ , and Brine. The organic layer was dried over  $\text{Na}_2\text{SO}_4$ , concentrated by distillation at reduced pressure, and the residue was purified by flash chromatography on silica gel (ethyl acetate), giving **S24** (50 mg, 97%) as a white solid.

**$^1\text{H}$  NMR ( $\text{CDCl}_3$ , 500 MHz):**  $\delta$  7.42 (d,  $J = 1.8$  Hz, 1H), 7.41 (dd,  $J = 1.8, 1.8$  Hz, 1H), 6.43 (q,  $J = 4.8$  Hz, 1H), 6.29 (d,  $J = 1.8$  Hz, 1H), 5.69 (s, 1H), 4.19 (s, 1H), 4.16 (s, 1H), 4.12 (dd,  $J = 10.6, 1.6$  Hz, 1H), 3.92 (d,  $J = 9.0$  Hz, 1H), 3.68 (d,  $J = 9.0$  Hz, 1H), 3.50 (s, 1H), 2.78 (d,  $J = 4.8$  Hz, 2H), 2.52 (dd,  $J = 12.2, 7.0$  Hz, 1H), 2.43 (dd,  $J = 15.4, 1.6$  Hz, 1H), 2.17 (dd,  $J = 15.4, 10.6$  Hz, 1H), 1.89 (s, 1H), 1.86 – 1.80 (m, 2H), 1.77 – 1.67 (m, 1H), 1.53 – 1.48 (m, 1H), 1.47 (s, 3H), 1.32 (s, 3H), 1.30 (s, 3H), 1.26-1.21 (m, 1H), 1.22 (s, 3H). (34 non-exchangeable protons)

**$^{13}\text{C}$  NMR ( $\text{CDCl}_3$ , 125 MHz):**  $\delta$  171.04, 167.70, 143.21, 141.23, 120.30, 109.61, 82.97, 80.06, 78.47, 78.41, 76.54, 75.31, 66.69, 66.06, 58.26, 58.23, 43.88, 42.65, 39.95, 39.67, 31.29, 26.32, 25.40, 24.81, 20.35, 19.12, 12.67.

**HRMS(ESI):**  $m/z$  calc. for  $\text{C}_{27}\text{H}_{36}\text{NO}_8$   $[\text{M}+\text{H}]^+$ : 502.2441, found: 502.2443.

**mp:** 158-159° C.

**Opt. Rot.:**  $[\alpha]_{\text{D}}^{25} = +43$  ( $c = 0.15$ , acetone).

## SUPPORTING INFORMATION

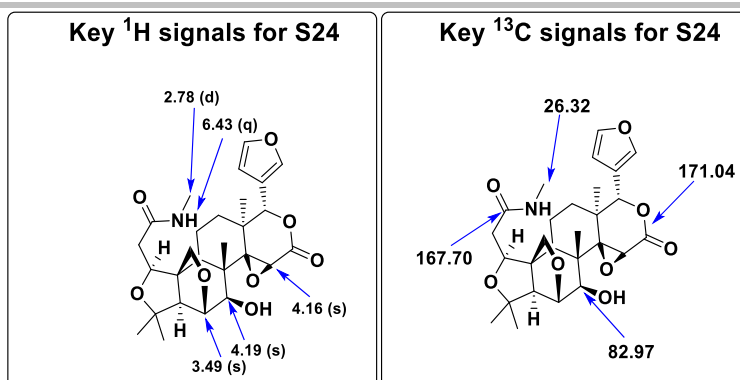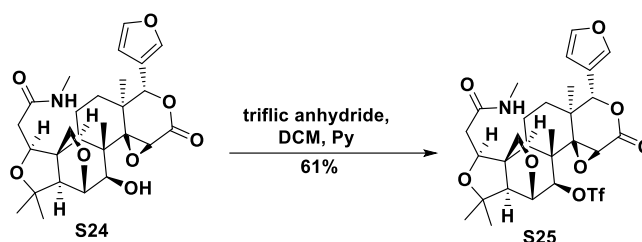

**Procedure:** Triflic anhydride (80  $\mu\text{L}$ , 0.47 mmol) was added at 0° C to a solution of **S24** (137 mg, 0.24 mmol) in dichloromethane (3 mL) and pyridine (77  $\mu\text{L}$ ) and the resulting mixture was stirred at 30° C for 12 h. The reaction was quenched with iced water and extracted three times with dichloromethane. The organic layers were combined, washed with brine, dried over  $\text{Na}_2\text{SO}_4$ , and concentrated by distillation under reduced pressure. The crude residue was purified by silica gel flash chromatography (hexane-ethyl acetate 4:6) to provide **S25** (93 mg, 61%) as a yellowish solid.

**<sup>1</sup>H NMR (CDCl<sub>3</sub>, 500 MHz):**  $\delta$  7.36 (s, 1H), 7.35 (d,  $J = 1.8$  Hz, 1H), 6.22 (d,  $J = 1.8$  Hz, 1H), 6.19 (q,  $J = 4.8$  Hz, 1H), 5.63 (s, 1H), 4.76 (s, 1H), 4.46 (s, 1H), 4.09 (dd,  $J = 10.2, 1.5$  Hz, 1H), 4.08 (s, 1H), 3.94 (d,  $J = 9.1$  Hz, 1H), 3.69 (d,  $J = 9.1$  Hz, 1H), 2.72 (d,  $J = 4.8$  Hz, 3H), 2.53 (dd,  $J = 12.4, 6.8$  Hz, 1H), 2.37 (dd,  $J = 15.1, 1.5$  Hz, 1H), 2.11 (dd,  $J = 15.1, 10.2$  Hz, 1H), 1.89 (s, 1H), 1.87 – 1.72 (m, 2H), 1.68 (dd,  $J = 13.7, 8.8$  Hz, 1H), 1.53 (s, 3H), 1.42 (dd,  $J = 13.7, 9.4$  Hz, 1H), 1.29 (s, 3H), 1.24 (s, 3H), 1.19 (s, 3H).

**<sup>13</sup>C NMR (CDCl<sub>3</sub>, 125 MHz):**  $\delta$  170.56, 166.92, 143.34, 141.36, 119.99, 117.98 (q,  $J = 313$  Hz, 1C), 109.53, 90.25, 80.13, 79.88, 78.03, 76.38, 74.32, 66.47, 65.81, 58.42, 57.66, 44.04, 43.39, 40.57, 39.67, 31.05, 26.37, 25.19, 24.67, 20.63, 19.29, 13.94..

**<sup>19</sup>F NMR (CDCl<sub>3</sub>, 470 MHz):**  $\delta$  - 75.22.

**HRMS(ESI):**  $m/z$  calc. for  $\text{C}_{28}\text{H}_{35}\text{NO}_{10}\text{SF}_3$   $[\text{M}+\text{H}]^+$ : 634.19341, found: 634.1925.

**mp:** decomposes upon heating above 120° C.

**Opt. Rot.:**  $[\alpha]_{\text{D}}^{25} = + 75$  ( $c = 0.08$ , acetone).

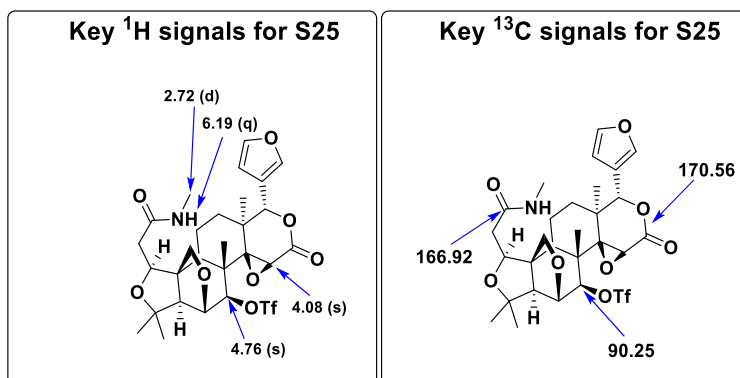

## SUPPORTING INFORMATION

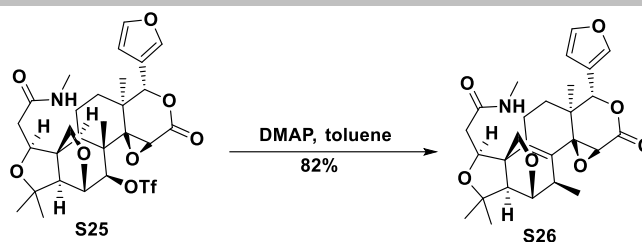

**Procedure:** DMAP (41 mg, 0.34 mmol) was added to a solution of **S25** (86 mg, 0.13 mmol) in toluene (2 mL) and the resulting solution was heated at 100° C for 12 h. Toluene was evaporated and the residue partitioned between water and dichloromethane. The aqueous layer was extracted three times with dichloromethane. The organic layers were combined, washed with brine, dried over Na<sub>2</sub>SO<sub>4</sub>, and concentrated by distillation under reduced pressure. The crude residue was purified by silica gel flash chromatography (ethyl acetate) to provide **S26** 87% pure, which was further purified by silica gel flash chromatography (dichloromethane-methanol 95:5) to provide **S26** 90% pure (54 mg, 82%) as a white solid.

**<sup>1</sup>H NMR (CDCl<sub>3</sub>, 500 MHz):** δ 7.45 (d, *J* = 2.0 Hz, 1H), 7.42 (dd, *J* = 2.0, 2.0 Hz 1H), 6.44 (d, *J* = 4.8 Hz, 1H), 6.38 (d, *J* = 2.0 Hz, 1H), 5.53 (s, 1H), 4.35 (dd, *J* = 10.4, 1.6 Hz, 1H), 4.08 (d, *J* = 3.0 Hz, 1H), 4.07 (s, 1H), 3.90 (d, *J* = 7.5 Hz, 1H), 3.76 (d, *J* = 7.5 Hz, 1H), 2.82 (d, *J* = 4.8 Hz, 3H), 2.62 (dd, *J* = 15.2, 1.6 Hz, 1H), 2.40 – 2.29 (m, 3H), 2.16 (s, 1H), 1.71 – 1.58 (m, 2H), 1.56 – 1.47 (m, 1H), 1.34 (s, 3H), 1.33 (s, 3H), 1.09 (d, *J* = 6.7 Hz, 3H), 0.94 (s, 3H).

**<sup>13</sup>C NMR (CDCl<sub>3</sub>, 125 MHz):** δ 170.94, 167.58, 148.83, 143.27, 141.18, 124.85, 119.92, 109.85, 80.51, 79.62, 76.96, 73.74, 73.09, 66.54, 64.68, 58.67, 54.08, 42.51, 40.14, 37.99, 30.86, 26.51, 26.32, 24.67, 23.64, 16.72, 13.45.

**HRMS(ESI):** *m/z* calc. for C<sub>27</sub>H<sub>34</sub>NO<sub>7</sub> [M+H]<sup>+</sup>: 484.2335, found: 484.2333.

**Opt. Rot.:** [α]<sub>D</sub><sup>25</sup> = + 53 (c = 0.15, acetone).

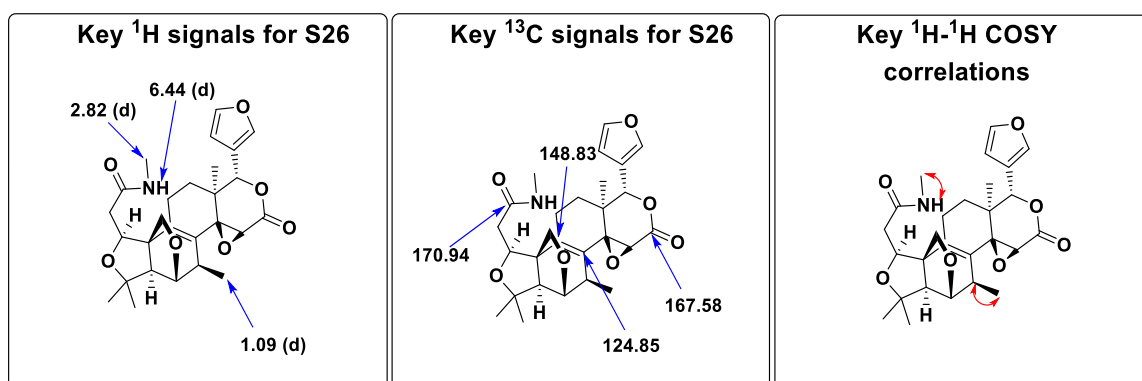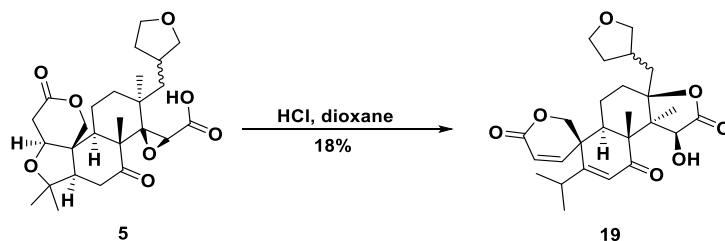

**Procedure:** Hydrochloric acid (12 M, 3.2 mL) was added to a solution of **5** (200 mg, 0.40 mmol) in dioxane (3.2 mL) and the resulting solution was heated to 100° C for 18 h. After cooling, dioxane was evaporated under vacuum, and the residue was taken up with water (4 mL), and slowly basified to pH 8 with a saturated solution of NaHCO<sub>3</sub>. The aqueous layer was then extracted three times with dichloromethane. The organic layers were combined, washed with brine, dried over Na<sub>2</sub>SO<sub>4</sub>, and concentrated by distillation under reduced pressure. The crude residue was purified by silica gel flash chromatography (hexane-ethyl acetate 1:1) to provide **19** (34 mg, 18%) as a white solid.

**Note:** Compounds **19**, as its starting material, exists as a mixture of two diastereomers (4:3 ratio)

**<sup>1</sup>H NMR (CDCl<sub>3</sub>, 500 MHz):** δ 6.83 (d, *J* = 2.1 Hz, 1H), 6.82 (d, *J* = 2.1 Hz, 1H), 6.40 (d, *J* = 9.9 Hz, 2H), 6.36 (d, *J* = 9.8 Hz, 2H), 6.19 (s, 2H), 4.68 (d, *J* = 12.2 Hz, 2H), 4.63 (d, 2.1 Hz, 1H), 4.61 (d, 2.1 Hz, 1H), 4.47 (d, *J* = 12.2 Hz, 2H), 4.04 (dd, *J* = 8.9, 7.2 Hz, 1H), 3.93 (t, *J* = 7.8 Hz, 1H), 3.87 – 3.61 (m, 6H), 3.23 (t, *J* = 8.3 Hz, 1H), 3.14 (t, *J* = 8.8 Hz, 1H), 2.55 – 2.45 (m, 4H), 2.39 – 2.33 (m, 1H), 2.23 – 2.18 (m, 1H), 2.16 – 2.04 (m, 2H), 2.00 – 1.92 (m, 2H), 1.87 – 1.71 (m, 4H), 1.67 – 1.58 (m, 4H), 1.50 – 1.43 (m, 2H), 1.48 (s, 3H), 1.47 (s, 3H), 1.24 (s, Hz, 3H), 1.23 (s, 3H), 1.18 (d, *J* = 6.8 Hz, 6H), 1.14 (d, *J* = 6.8 Hz, 6H).

## SUPPORTING INFORMATION

**$^{13}\text{C}$  NMR (CDCl<sub>3</sub>, 125 MHz):**  $\delta$  204.37, 175.46, 175.25, 171.65, 171.63, 161.64, 148.43, 125.94, 124.41, 85.69, 85.64, 75.56, 75.43, 74.06, 73.91, 70.06, 68.23, 67.08, 54.21, 54.12, 52.03, 45.17, 43.97, 42.39, 41.65, 34.94, 34.24, 34.07, 31.86, 31.49, 24.15, 24.00, 18.41, 18.39, 16.95, 16.86.

**HRMS(ESI):**  $m/z$  calc. for C<sub>26</sub>H<sub>35</sub>O<sub>7</sub> [M+H]<sup>+</sup>: 459.2383, found: 459.2378.

**mp:** decomposes upon heating above 240° C.

**Opt. Rot.:**  $[\alpha]_{\text{D}}^{25} = -42$  (c = 0.15, acetone).

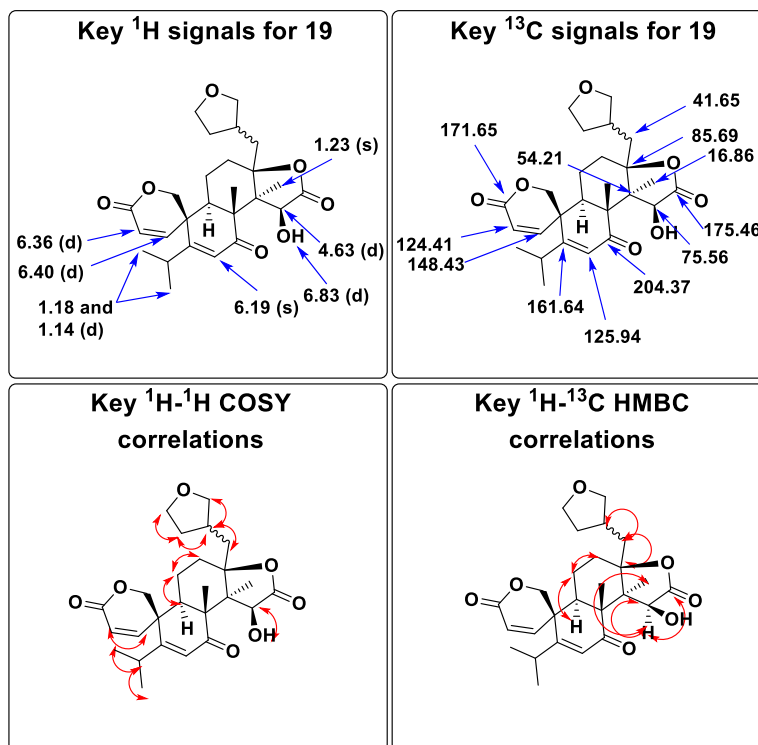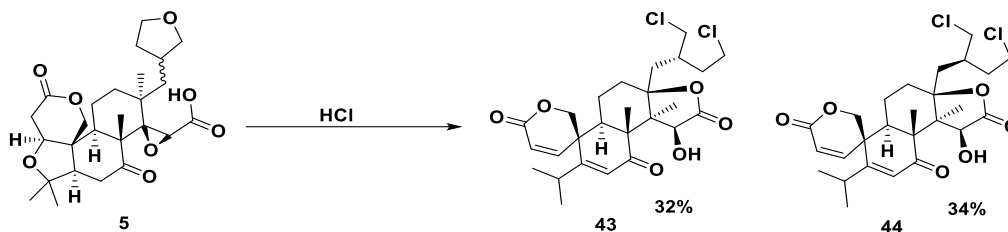

**Procedure:** A solution of **5** (200 mg, 0.40 mmol) in hydrochloric acid (12 M, 3.2 mL) was refluxed for 18 h. After cooling, the solvent was evaporated and the obtained residue was taken up with water (2 mL), and slowly basified to pH 8 with a saturated solution of NaHCO<sub>3</sub>. The aqueous layer was then extracted three times with dichloromethane. The organic layers were combined, washed with brine, dried over Na<sub>2</sub>SO<sub>4</sub>, and concentrated by distillation under reduced pressure. The crude residue was purified by silica gel flash chromatography (hexane-ethyl acetate 1:1) to provide **43** (66 mg, 32%) and **44** (70 mg, 34%) as a white solid.

**43** (66 mg, 32%)

**$^1\text{H}$  NMR (CDCl<sub>3</sub>, 500 MHz):**  $\delta$  6.84 (d,  $J = 2.2$  Hz, 1H), 6.41 (d,  $J = 9.9$  Hz, 1H), 6.36 (d,  $J = 9.9$  Hz, 1H), 6.19 (s, 1H), 4.68 (d,  $J = 2.2$  Hz, 1H), 4.68 (dd,  $J = 12.2$ , 1.1 Hz, 1H), 4.47 (d,  $J = 12.2$  Hz, 1H), 3.78 (dd,  $J = 11.6$ , 3.5 Hz, 1H), 3.65 – 3.51 (m, 3H), 2.55 (ddd,  $J = 15.3$ , 4.2, 2.4 Hz, 1H), 2.49 (p,  $J = 6.7$  Hz, 1H), 2.44 – 2.40 (m, 1H), 2.19 (dd,  $J = 14.8$ , 8.8 Hz, 1H), 2.14 (dd,  $J = 12.8$ , 2.1 Hz, 1H), 2.04 – 1.93 (m, 2H), 1.78 – 1.71 (m, 1H), 1.66 (ddt,  $J = 13.9$ , 5.0, 2.2 Hz, 1H), 1.53 – 1.50 (m, 1H), 1.48 (s, 3H), 1.27 – 1.25 (m, 1H), 1.26 (s, 3H), 1.18 (d,  $J = 6.7$  Hz, 3H), 1.14 (d,  $J = 6.7$  Hz, 3H).

**$^{13}\text{C}$  NMR (CDCl<sub>3</sub>, 125 MHz):**  $\delta$  204.35, 175.23, 171.77, 161.60, 148.42, 125.91, 124.44, 85.72, 75.58, 70.10, 54.41, 52.11, 48.93, 45.16, 44.03, 42.07, 40.67, 35.35, 33.57, 32.02, 31.50, 24.13, 24.00, 18.44, 18.40, 16.93.

**HRMS(ESI):**  $m/z$  calc. for C<sub>26</sub>H<sub>35</sub>O<sub>6</sub>Cl<sub>2</sub> [M+H]<sup>+</sup>: 513.1811, found: 513.1808.

**mp:** >260° C.

**Opt. Rot.:**  $[\alpha]_{\text{D}}^{25} = -19$  (c = 0.11, acetone).

## SUPPORTING INFORMATION

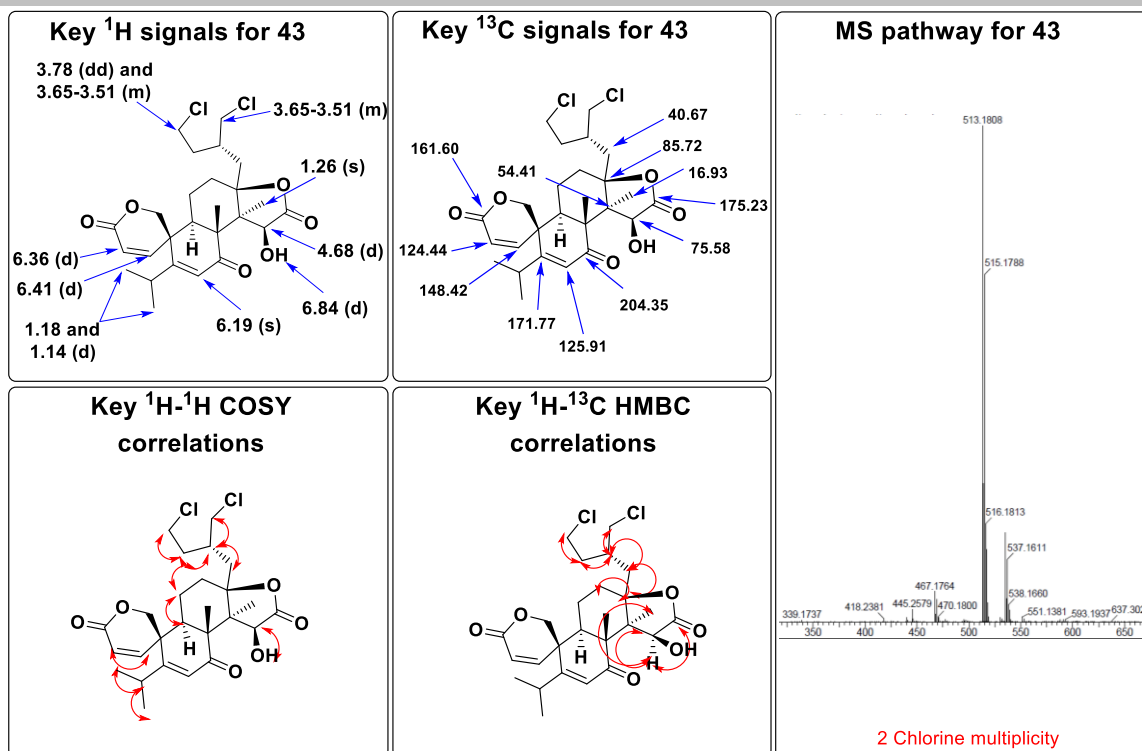

**44** (70 mg, 34%)

**$^1\text{H}$  NMR (CDCl<sub>3</sub>, 500 MHz):**  $\delta$  6.88 (d,  $J$  = 2.2 Hz, 1H), 6.41 (d,  $J$  = 9.9 Hz, 1H), 6.36 (d,  $J$  = 9.9 Hz, 1H), 6.19 (s, 1H), 4.67 (dd,  $J$  = 12.2, 1 Hz, 1H), 4.61 (d,  $J$  = 2.2 Hz, 1H), 4.47 (d,  $J$  = 12.2 Hz, 1H), 3.66 – 3.55 (m, 2H), 3.55 – 3.46 (m, 2H), 2.58 – 2.48 (m, 2H), 2.35 – 2.29 (m, 1H), 2.15 (dd,  $J$  = 12.8, 2.1 Hz, 1H), 2.07 – 1.92 (m, 2H), 1.85 – 1.73 (m, 3H), 1.71 – 1.62 (m, 1H), 1.53 (dd,  $J$  = 5.5, 1.9 Hz, 1H), 1.48 (s, 3H), 1.26 (s, 3H), 1.18 (d,  $J$  = 6.8 Hz, 3H), 1.14 (d,  $J$  = 6.8 Hz, 3H).

**$^{13}\text{C}$  NMR (CDCl<sub>3</sub>, 125 MHz):**  $\delta$  204.31, 175.20, 171.68, 161.61, 148.44, 125.92, 124.43, 85.74, 75.45, 70.09, 54.50, 52.06, 48.66, 45.18, 44.07, 42.22, 38.61, 36.02, 32.05 (2C), 31.50, 24.13, 24.00, 18.45, 18.40, 16.79.

**HRMS(ESI):**  $m/z$  calc. for C<sub>26</sub>H<sub>35</sub>O<sub>6</sub>Cl<sub>2</sub> [M+H]<sup>+</sup>: 513.1811, found: 513.1803.

**mp:** 253-255° C.

**Opt. Rot.:**  $[\alpha]_{\text{D}}^{25}$  = - 38 (c = 0.12, acetone).

## SUPPORTING INFORMATION

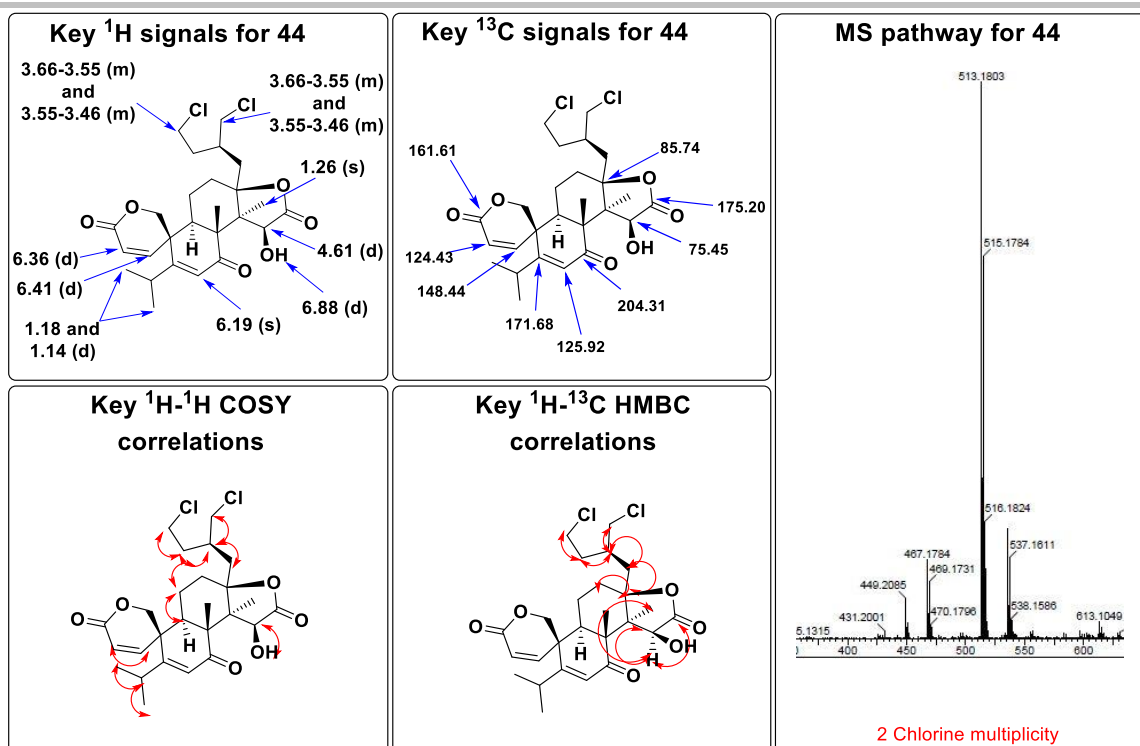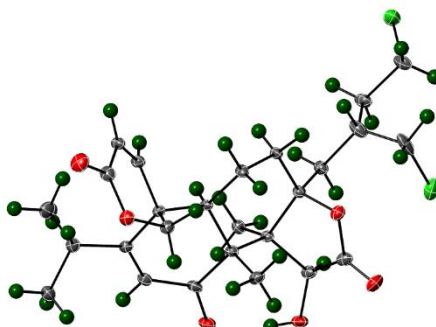

## Crystallography

**Experimental Protocol:** Intensity data were collected on a Bruker D8 Venture kappa diffractometer equipped with a Photon 100 CMOS detector. An I $\mu$ s microfocus Mo source ( $\lambda = 0.71073 \text{ \AA}$ ) coupled with a multi-layer mirror monochromator provided the incident beam. The sample was mounted on a 0.3 mm loop with the minimal amount of Paratone-N oil. Data was collected as a series of  $\varphi$  and/or  $\omega$  scans. Data was collected at 100 K using a cold stream of N<sub>2</sub>(g). The collection, cell refinement, and integration of intensity data was carried out with the APEX3 software.<sup>1</sup> A semi-empirical absorption correction was performed with SADABS.<sup>2</sup> The structure was phased with intrinsic methods using SHELXT<sup>3</sup> and refined with the full-matrix least-squares program SHELXL.<sup>4</sup>

CCDC: 2082416

(1) Bruker (2016). APEX3. Bruker AXS, Inc., Madison, Wisconsin, USA.

(2) L. Krause, R. Herbst-Irmer, G. M. Sheldrick, D. Stalke, *J. Appl. Cryst.*, **2015**, *48*, 3–10.

(3) G. M. Sheldrick, *Acta Cryst.* **2015**, *A71*, 3–8.

(4) G. M. Sheldrick, *Acta Cryst.* **2015**, *C71*, 3–8.

**Table S7.** Crystal data and structure refinement for ed85cs.

Identification code ed85cs

## SUPPORTING INFORMATION

Empirical formula C<sub>26</sub>H<sub>34</sub>Cl<sub>2</sub>O<sub>6</sub>  
 Formula weight 513.43  
 Temperature 100(2) K  
 Wavelength 0.71073 Å  
 Crystal system Monoclinic  
 Space group P2<sub>1</sub>  
 Unit cell dimensions a = 8.6271(3) Å a = 90°.  
                           b = 22.9853(8) Å b = 97.1495(10)°.  
                           c = 12.8535(5) Å c = 90°.  
 Volume 2528.99(16) Å<sup>3</sup>  
 Z 4  
 Density (calculated) 1.348 Mg/m<sup>3</sup>  
 Absorption coefficient 0.296 mm<sup>-1</sup>  
 F(000) 1088  
 Crystal size 0.424 x 0.368 x 0.215 mm<sup>3</sup>  
 Theta range for data collection 2.379 to 28.303°.  
 Index ranges -11 ≤ h ≤ 11, -30 ≤ k ≤ 30, -17 ≤ l ≤ 17  
 Reflections collected 86750  
 Independent reflections 12497 [R(int) = 0.0472]  
 Completeness to theta = 25.242° 99.9 %  
 Absorption correction Semi-empirical from equivalents  
 Max. and min. transmission 0.7457 and 0.6893  
 Refinement method Full-matrix least-squares on F<sup>2</sup>  
 Data / restraints / parameters 12497 / 83 / 684  
 Goodness-of-fit on F<sup>2</sup> 1.097  
 Final R indices [I > 2σ(I)] R1 = 0.0696, wR2 = 0.1895  
 R indices (all data) R1 = 0.0707, wR2 = 0.1903  
 Absolute structure parameter 0.091(14)  
 Extinction coefficient n/a  
 Largest diff. peak and hole 1.097 and -0.569 e.Å<sup>-3</sup>

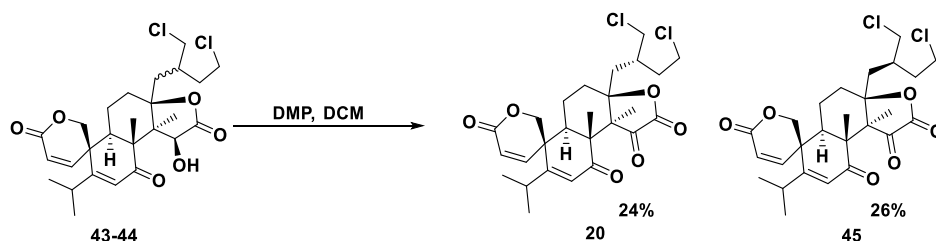

**Procedure:** Dess-Martin periodinane (164 mg, 0.39 mmol) was added to a solution of a mixture of **43** and **44** (100 mg, 0.19 mmol) in dichloromethane (2.4 mL) and the resulting solution was stirred at 30° C for 3 h. A 5% NaHCO<sub>3</sub> solution was added to the reaction mixture and the aqueous layer was extracted three times with dichloromethane. The organic layers were combined, washed with brine, dried over Na<sub>2</sub>SO<sub>4</sub>, and concentrated by distillation under reduced pressure. The crude residue was purified by silica gel flash chromatography (hexane-ethyl acetate 1:1) to provide **20** (23 mg, 24%) and **45** (26 mg, 26%) as white solids.

**20** (23 mg, 24%)

**<sup>1</sup>H NMR (CDCl<sub>3</sub>, 500 MHz):** δ 6.45 (dd, *J* = 9.9, 1.5 Hz, 1H), 6.36 (d, *J* = 9.9 Hz, 1H), 6.07 (s, 1H), 4.66 (dd, *J* = 12.3, 1.5 Hz, 1H), 4.46 (d, *J* = 12.3 Hz, 1H), 3.60 (dd, *J* = 11.5, 3.4 Hz, 1H), 3.56 (dd, *J* = 11.4, 5.8 Hz, 1H), 3.49 (dd, *J* = 11.5, 5.8 Hz, 1H), 3.49 – 3.44 (m, 1H), 2.61 (ddd, *J* = 15.3, 4.1, 2.4 Hz, 1H), 2.44 (hept, *J* = 6.7 Hz, 1H), 2.43 – 2.37 (m, 1H), 2.17 – 2.07 (m, 2H), 1.94 (dd, *J* = 13.4, 3.9 Hz, 1H), 1.93 – 1.88 (m, 1H), 1.82 – 1.70 (m, 2H), 1.67 – 1.62 (m, 1H), 1.38 (s, 3H), 1.26 (s, 3H), 1.15 (d, *J* = 6.7, 3H), 1.14 (d, *J* = 6.7, 3H), 1.09 (dd, *J* = 13.4, 6.5 Hz, 1H).

**<sup>13</sup>C NMR (CDCl<sub>3</sub>, 125 MHz):** δ 198.18, 197.38, 167.45, 161.69, 161.48, 148.30, 126.18, 124.21, 87.27, 69.53, 56.49, 49.92, 48.52, 45.16, 44.07, 42.65, 41.87, 35.24, 32.42, 31.32, 30.80, 24.26, 24.15, 21.06, 18.53, 13.49.

**HRMS(ESI):** *m/z* calc. for C<sub>26</sub>H<sub>33</sub>O<sub>6</sub>Cl<sub>2</sub> [M+H]<sup>+</sup>: 511.1654, found: 511.1668.

**mp:** 252-253° C.

**Opt. Rot.:** [α]<sub>D</sub><sup>25</sup> = - 90 (c = 0.12, acetone).



## SUPPORTING INFORMATION

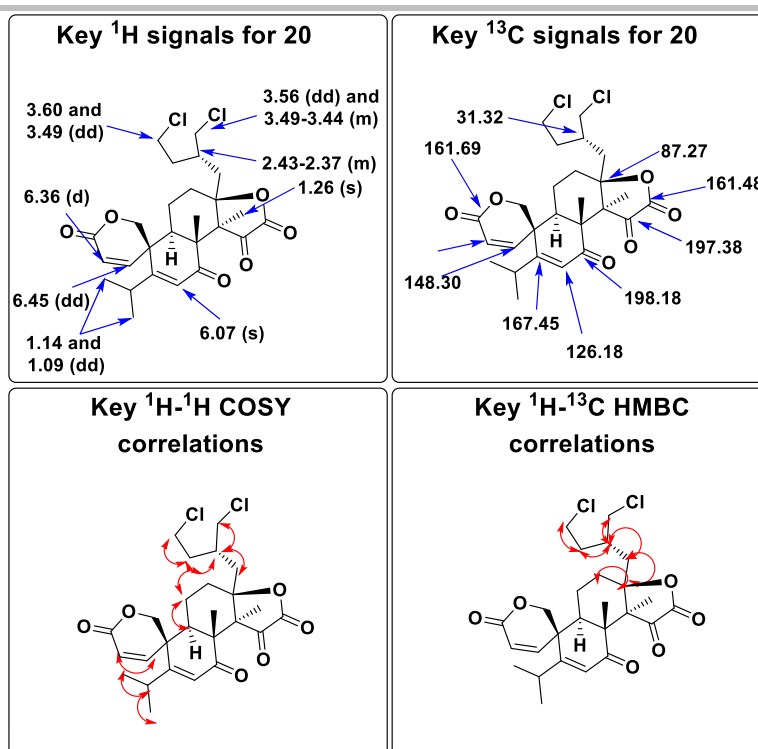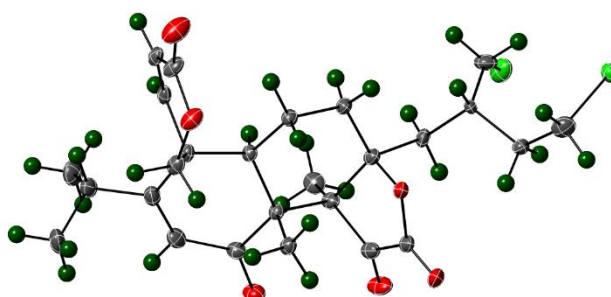

## Crystallography

**Experimental Protocol:** Intensity data were collected on a Bruker D8 Venture kappa diffractometer equipped with a Photon 100 CMOS detector. An I $\mu$ s microfocus Mo source ( $\lambda = 0.71073 \text{ \AA}$ ) coupled with a multi-layer mirror monochromator provided the incident beam. The sample was mounted on a 0.3 mm loop with the minimal amount of Paratone-N oil. Data was collected as a series of  $\varphi$  and/or  $\omega$  scans. Data was collected at 100 K using a cold stream of N $_2$ (g). The collection, cell refinement, and integration of intensity data was carried out with the APEX3 software.<sup>1</sup> A semi-empirical absorption correction was performed with SADABS.<sup>2</sup> The structure was phased with intrinsic methods using SHELXT<sup>3</sup> and refined with the full-matrix least-squares program SHELXL.<sup>4</sup>

CCDC: 2082414

(1) Bruker (2016). APEX3. Bruker AXS, Inc., Madison, Wisconsin, USA.

(2) L. Krause, R. Herbst-Irmer, G. M. Sheldrick, D. Stalke, *J. Appl. Cryst.*, **2015**, *48*, 3–10.

(3) G. M. Sheldrick, *Acta Cryst.* **2015**, *A71*, 3–8.

(4) G. M. Sheldrick, *Acta Cryst.* **2015**, *C71*, 3–8.

**Table S8.** Crystal data and structure refinement for ed25ds.

Identification code    ed25ds

## SUPPORTING INFORMATION

Empirical formula C<sub>26</sub>H<sub>32</sub>Cl<sub>2</sub>O<sub>6</sub>  
Formula weight 511.41  
Temperature 100(2) K  
Wavelength 1.54178 Å  
Crystal system Monoclinic  
Space group P2<sub>1</sub>  
Unit cell dimensions a = 9.2445(3) Å a = 90°.  
b = 11.2142(3) Å b = 109.4239(7)°.  
c = 12.7629(4) Å c = 90°.  
Volume 1247.82(7) Å<sup>3</sup>  
Z 2  
Density (calculated) 1.361 Mg/m<sup>3</sup>  
Absorption coefficient 2.671 mm<sup>-1</sup>  
F(000) 540  
Crystal size 0.326 x 0.289 x 0.282 mm<sup>3</sup>  
Theta range for data collection 3.672 to 68.470°.  
Index ranges -11 ≤ h ≤ 11, -13 ≤ k ≤ 13, -15 ≤ l ≤ 15  
Reflections collected 26142  
Independent reflections 4585 [R(int) = 0.0415]  
Completeness to theta = 67.679° 100.0 %  
Absorption correction Semi-empirical from equivalents  
Max. and min. transmission 0.7531 and 0.6555  
Refinement method Full-matrix least-squares on F<sup>2</sup>  
Data / restraints / parameters 4585 / 273 / 405  
Goodness-of-fit on F<sup>2</sup> 1.023  
Final R indices [I > 2σ(I)] R<sub>1</sub> = 0.0334, wR<sub>2</sub> = 0.0932  
R indices (all data) R<sub>1</sub> = 0.0339, wR<sub>2</sub> = 0.0938  
Absolute structure parameter 0.006(5)  
Extinction coefficient n/a  
Largest diff. peak and hole 0.471 and -0.230 e.Å<sup>-3</sup>

**45** (26 mg, 26%)

**<sup>1</sup>H NMR (CDCl<sub>3</sub>, 500 MHz):** δ 6.45 (dd, *J* = 9.9, 1.5 Hz, 1H), 6.36 (d, *J* = 9.9 Hz, 1H), 6.07 (s, 1H), 4.66 (dd, *J* = 12.3, 1.5 Hz, 1H), 4.46 (d, *J* = 12.3 Hz, 1H), 3.69 (dd, *J* = 11.7, 3.6 Hz, 1H), 3.61 – 3.58 (m, 1H), 3.56 – 3.54 (m, 2H), 2.63 (dd, *J* = 14.8, 3.4 Hz, 1H), 2.53 – 2.47 (m, 1H), 2.44 (hept, *J* = 6.7, 1H), 2.14 – 2.08 (m, 2H), 2.02 – 1.93 (m, 1H), 1.81 – 1.71 (m, 2H), 1.64 – 1.58 (m, 1H), 1.46 (d, *J* = 6.0 Hz, 2H), 1.38 (s, 3H), 1.25 (s, 3H), 1.15 (d, *J* = 6.7 Hz, 3H), 1.14 (d, *J* = 6.7 Hz, 3H).

**<sup>13</sup>C NMR (CDCl<sub>3</sub>, 125 MHz):** δ 198.18, 197.14, 167.38, 161.70, 161.40, 148.31, 126.21, 124.21, 87.33, 69.51, 56.45, 49.88, 47.72, 45.17, 42.70, 42.39, 42.10, 35.66, 31.32, 31.26, 30.79, 24.27, 24.15, 21.09, 18.51, 13.45.

**HRMS(ESI):** *m/z* calc. for C<sub>26</sub>H<sub>33</sub>O<sub>6</sub>Cl<sub>2</sub> [M+H]<sup>+</sup>: 511.1654, found: 511.1652.

**mp:** 214–215° C.

**Opt. Rot.:** [α]<sub>D</sub><sup>25</sup> = -118 (c = 0.10, acetone).

## SUPPORTING INFORMATION

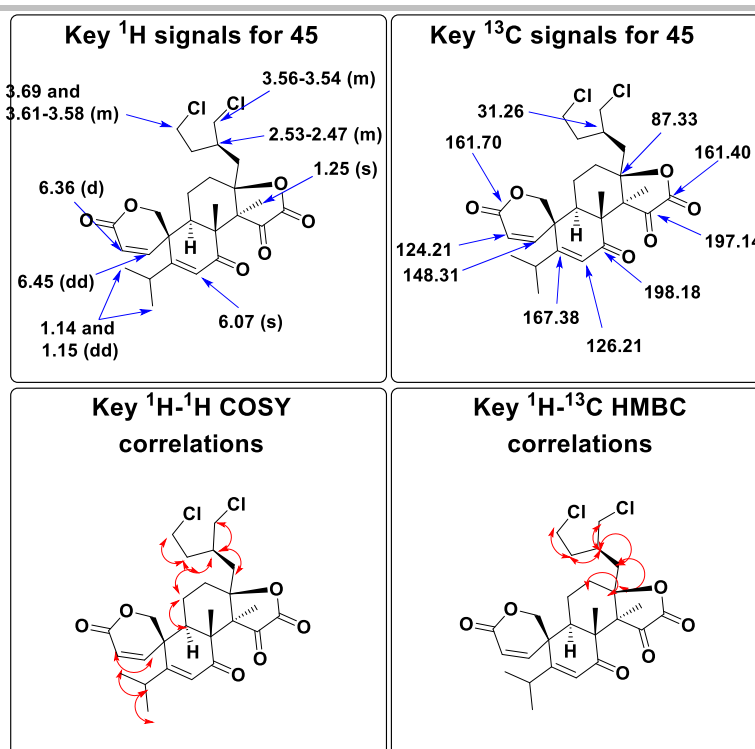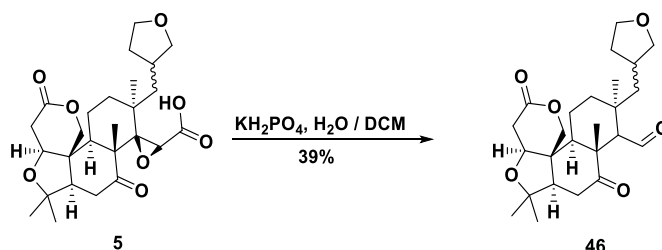

**Procedure:** A 0.2 M aqueous solution of potassium phosphate monobasic (1 mL) was added to a solution of **5** (100 mg, 0.20 mmol) in dichloromethane (0.4 mL) and the resulting mixture was heated at 100° C for 24 h. After cooling, water was added to the reaction mixture, and the aqueous layer was extracted three times with dichloromethane. The organic layers were combined, washed with brine, dried over  $\text{Na}_2\text{SO}_4$ , and concentrated by distillation under reduced pressure. The crude residue was purified by silica gel flash chromatography (hexane-ethyl acetate 3:7) to provide **46** (34 mg, 39%) as a white solid.

**Note:** Compounds **46**, as its starting material, exists as a mixture of two diastereomers (5:4 ratio).

**$^1\text{H}$  NMR ( $\text{CDCl}_3$ , 500 MHz):**  $\delta$  10.06 (d,  $J = 3.2$  Hz, 1H), 10.05 (d,  $J = 3.2$  Hz, 1H), 4.73 (d,  $J = 12.7$  Hz, 1H), 4.72 (d,  $J = 12.7$  Hz, 1H), 4.53 (d,  $J = 12.7$  Hz, 1H), 4.51 (d,  $J = 12.7$  Hz, 1H), 4.05 (t,  $J = 2.7$  Hz, 2H), 3.94 (dd,  $J = 7.6, 7.6$  Hz, 1H), 3.90 (dd,  $J = 7.6, 7.6$  Hz, 1H), 3.87 – 3.78 (m, 2H), 3.74 – 3.68 (m, 2H), 3.19 – 3.13 (m, 2H), 2.96 (dd,  $J = 16.9, 3.5$  Hz, 2H), 2.89 (dd,  $J = 14.1, 14.1$  Hz, 2H), 2.76 (dd,  $J = 16.9, 2.7$  Hz, 1H), 2.74 (dd,  $J = 16.9, 2.7$  Hz, 1H), 2.39 (d,  $J = 3.2$  Hz, 2H), 2.34 (dd,  $J = 14.1, 3.0$  Hz, 2H), 2.14 – 2.02 (m, 7H), 1.94 – 1.89 (m, 2H), 1.86 (dd,  $J = 12.8, 3.2$  Hz, 1H), 1.80 – 1.71 (m, 2H), 1.71 – 1.64 (m, 4H), 1.59 – 1.55 (m, 3H), 1.54 (s, 3H), 1.52 (s, 3H), 1.52 – 1.42 (m, 3H), 1.25 (s, 6H), 1.17 (s, 6H), 1.14 (s, 3H), 1.09 (s, 3H).

**$^{13}\text{C}$  NMR ( $\text{CDCl}_3$ , 125 MHz):**  $\delta$  209.96, 209.92, 203.02, 202.93, 169.63, 169.55, 80.03, 80.00, 78.50, 78.43, 74.70, 74.36, 67.83, 67.65, 65.44, 65.33, 63.21, 63.17, 60.01, 59.97, 56.17, 56.10, 54.08, 46.26, 46.20, 38.90, 38.88, 38.71, 38.55, 37.12, 37.10, 35.89, 35.86, 35.83, 35.69, 34.90, 34.82, 34.42, 30.28, 30.24, 29.71, 29.00, 21.96, 21.85, 21.03, 20.89, 17.47, 17.44.

**HRMS(ESI):**  $m/z$  calc. for  $\text{C}_{26}\text{H}_{37}\text{O}_6$   $[\text{M}+\text{H}]^+$ : 433.2590, found: 433.2591.

**mp:** 182–183° C.

**Opt. Rot.:**  $[\alpha]_{\text{D}}^{25} = -165$  ( $c = 0.12$ , acetone).

## SUPPORTING INFORMATION

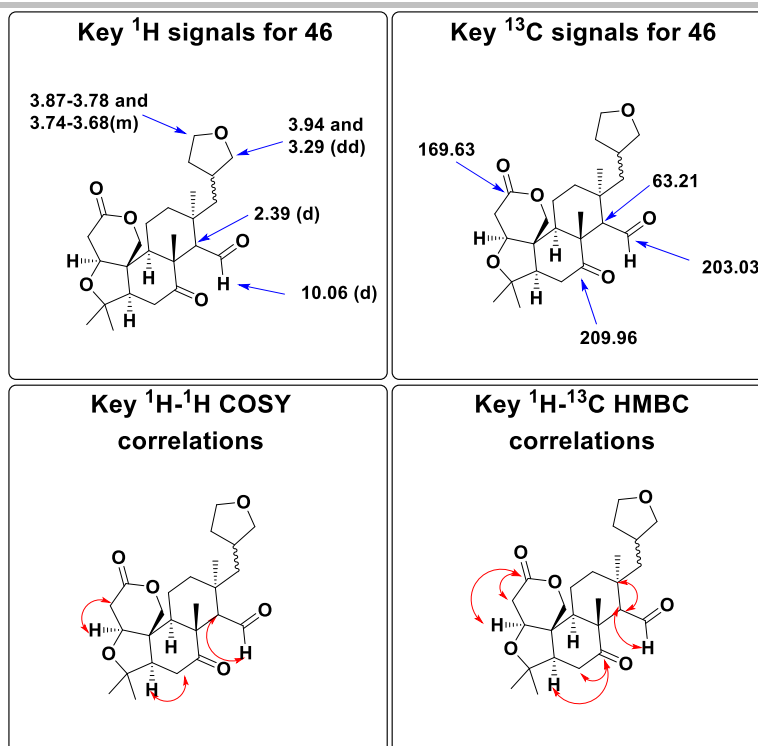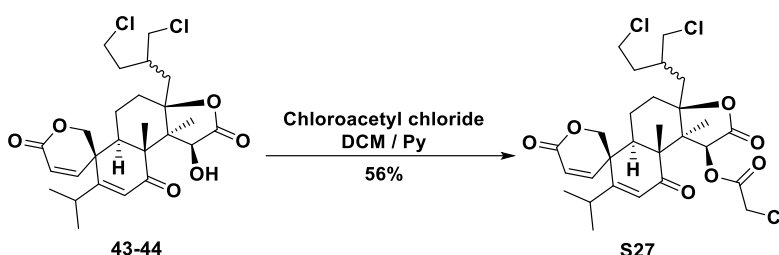

**Procedure:** Pyridine (12  $\mu\text{L}$ , 0.15 mmol) and chloroacetyl chloride (12  $\mu\text{L}$ , 0.15 mmol) were added to a solution of **43** and **44** (50 mg, 0.10 mmol) in dichloromethane (0.5 mL), and the resulting solution was stirred at 45  $^\circ\text{C}$  for 24 h. Water and dichloromethane were added to the mixture and the aqueous layer was extracted three times with dichloromethane. The combined organic layers were washed with brine and dried over  $\text{Na}_2\text{SO}_4$ . The solvent was concentrated by distillation under reduced pressure and the obtained crude residue was purified by silica gel flash chromatography (hexane-ethyl acetate 6:4) to provide **S27** (32 mg, 56%) as a white solid.

**Note:** Compounds **S27**, as its starting material, exists as a mixture of two diastereomers (1:1 ratio)

**$^1\text{H}$  NMR ( $\text{CDCl}_3$ , 500 MHz):**  $\delta$  6.36 (d,  $J = 9.9$  Hz, 2H), 6.31 (d,  $J = 9.9$  Hz, 2H), 6.00 (s, 2H), 5.97 (s, 1H), 5.93 (s, 1H), 4.71 (dd,  $J = 12.4$ , 1.4 Hz, 2H), 4.49 (d,  $J = 12.4$  Hz, 2H), 4.34 (s, 2H), 4.33 – 4.31 (m, 2H), 3.80 (dd,  $J = 11.5$ , 3.4 Hz, 1H), 3.64 – 3.47 (m, 7H), 2.58 – 2.48 (m, 2H), 2.46 – 2.37 (m, 2H), 2.42 (hept,  $J = 6.7$  Hz, 2H), 2.33 (dq,  $J = 9.9$ , 5.4 Hz, 1H), 2.24 (dd,  $J = 14.9$ , 8.8 Hz, 1H), 2.09 – 1.92 (m, 6H), 1.89 (q,  $J = 3.8$ , 2.7 Hz, 2H), 1.83 – 1.73 (m, 2H), 1.67 (ddt,  $J = 13.6$ , 4.8, 2.0 Hz, 2H), 1.62 – 1.48 (m, 2H), 1.43 (s, 3H), 1.43 (s, 3H), 1.31 (s, 6H), 1.15 (d,  $J = 6.8$  Hz, 6H), 1.11 (d,  $J = 6.7$  Hz, 6H).

**$^{13}\text{C}$  NMR ( $\text{CDCl}_3$ , 125 MHz):**  $\delta$  199.03, 171.65, 171.57, 167.49, 167.45, 165.97, 165.92, 161.78, 148.75, 126.63, 126.60, 123.96, 87.23, 76.29, 69.56, 54.75, 54.53, 51.35, 51.33, 48.78, 48.33, 44.99, 44.97, 43.52, 43.48, 42.19, 42.02, 41.43, 41.39, 40.71, 38.46, 35.96, 35.40, 33.43, 31.96, 31.32, 31.27, 30.91, 24.23, 24.19, 18.16, 18.12, 18.07, 17.16, 17.12.

**HRMS(ESI):**  $m/z$  calc. for  $\text{C}_{28}\text{H}_{36}\text{O}_7\text{Cl}_3$   $[\text{M}+\text{H}]^+$ : 589.1527, found: 589.1527.

**mp:** decomposes upon heating above 140  $^\circ\text{C}$ .

**Opt. Rot.:**  $[\alpha]_{\text{D}}^{25} = +43$  ( $c = 0.17$ , acetone).

## SUPPORTING INFORMATION

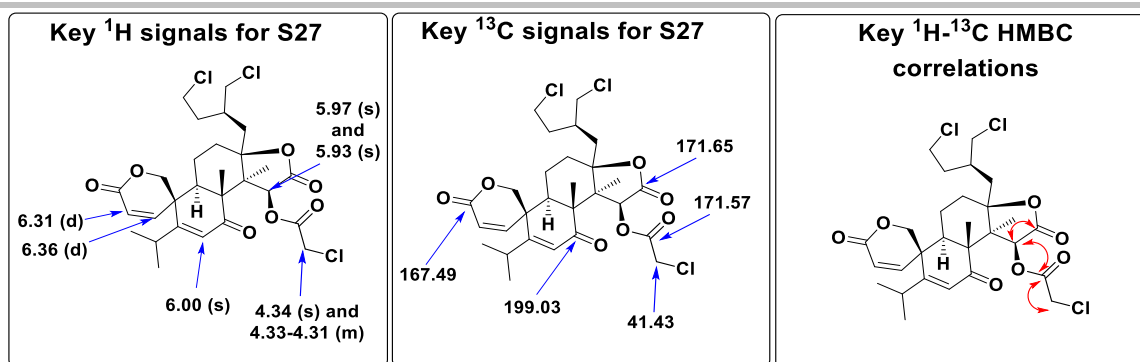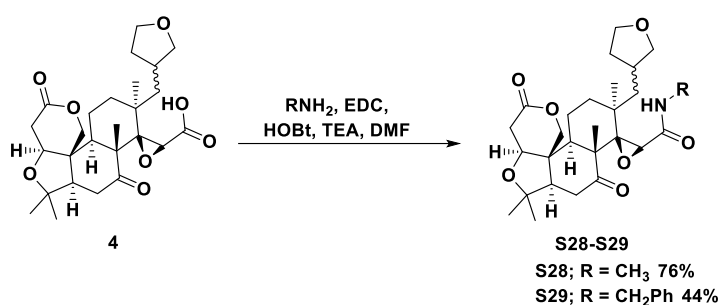

**Procedure:** HOBt (18 mg, 0.115 mmol), EDC (22  $\mu\text{L}$ , 0.12 mmol) and TEA (29  $\mu\text{L}$ , 0.21 mmol) were added to a solution of **4** (50 mg, 0.10 mmol) in DMF (0.7 ml), and the resulting mixture was stirred 30 minutes at 30° C. The suitable amine (0.11 mmol) was added to the mixture and the reaction was stirred overnight. The reaction was diluted with dichloromethane and washed with water, 5% citric acid, brine, 5%  $\text{NaHCO}_3$  and Brine. The organic layer was dried over  $\text{Na}_2\text{SO}_4$ , concentrated by distillation at reduced pressure, and the residue was purified by flash chromatography on silica gel (ethyl acetate) giving **S28-S29** (44-76%) as white solids.

**S28** (37 mg, 76%)

**Note:** Compounds **S28**, as its starting material, exists as a mixture of two diastereomers (1:1 ratio)

**$^1\text{H}$  NMR (DMSO-*d*<sub>6</sub>, 500 MHz):**  $\delta$  8.11 (q,  $J = 4.6$  Hz, 2H), 4.62 (d,  $J = 13.1$  Hz, 1H), 4.61 (d,  $J = 13.1$  Hz, 1H), 4.47 (d,  $J = 13.1$  Hz, 2H), 4.22 (d,  $J = 3.7$  Hz, 2H), 3.95 (t,  $J = 7.6$  Hz, 1H), 3.80 (t,  $J = 7.6$  Hz, 1H), 3.68 (ddd,  $J = 17.2, 8.4, 3.8$  Hz, 2H), 3.64 – 3.54 (m, 2H), 3.11 (s, 1H), 3.09 (s, 1H), 3.09 (t,  $J = 8.3$  Hz, 1H), 3.04 (t,  $J = 8.3$  Hz, 1H), 2.85 – 2.74 (m, 4H), 2.66 (ddd,  $J = 17.8, 4.0, 1.6$  Hz, 2H), 2.60 (d,  $J = 4.6$  Hz, 3H), 2.59 (d,  $J = 4.6$  Hz, 3H), 2.48 – 2.36 (m, 6H), 2.23 – 1.95 (m, 6H), 1.82 (dd,  $J = 14.5, 5.2$  Hz, 1H), 1.78 – 1.59 (m, 5H), 1.55 (dd,  $J = 14.5, 5.5$  Hz, 1H), 1.49 – 1.29 (m, 5H), 1.23 (s, 6H), 1.15 (s, 3H), 1.13 (s, 3H), 0.99 (s, 6H), 0.90 (s, 3H), 0.88 (s, 3H).

**$^{13}\text{C}$  NMR (DMSO-*d*<sub>6</sub>, 125 MHz):**  $\delta$  207.47, 207.31, 170.96, 168.22, 80.34, 78.60, 78.56, 74.34, 71.54, 71.49, 67.46, 67.14, 64.29, 64.26, 59.51, 59.36, 55.70, 55.65, 55.38, 51.95, 51.83, 49.11, 48.58, 45.88, 45.86, 43.77, 43.52, 36.78, 36.72, 36.47, 36.45, 36.20, 36.16, 35.70, 34.92, 34.88, 30.80, 26.73, 26.68, 25.75, 25.73, 22.20, 20.18, 20.12, 18.73, 18.60.

**HRMS(ESI):**  $m/z$  calc. for  $\text{C}_{27}\text{H}_{40}\text{NO}_7$   $[\text{M}+\text{H}]^+$ : 490.2805, found: 490.2790.

**mp:** 134-135° C.

**Opt. Rot.:**  $[\alpha]_{\text{D}}^{25} = -48$  ( $c = 0.25$ , acetone).

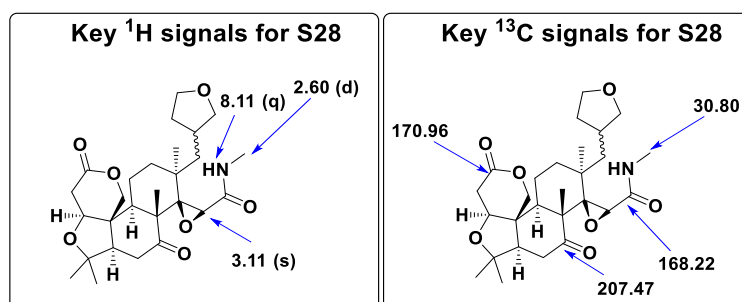

**S29** (25 mg, 44%)

**Note:** Compounds **S29**, as its starting material, exists as a mixture of two diastereomers (1:1 ratio)

## SUPPORTING INFORMATION

**$^1\text{H}$  NMR (DMSO- $d_6$ , 500 MHz):**  $\delta$  8.70 (q,  $J$  = 5.8 Hz, 2H), 7.33 – 7.26 (m, 8H), 7.25 – 7.22 (m, 2H), 4.60 (d,  $J$  = 13.1, 1H), 4.59 (d,  $J$  = 13.1, 1H), 4.46 (d,  $J$  = 13.1 Hz, 2H), 4.34 (t,  $J$  = 5.8 Hz, 1H), 4.32 (t,  $J$  = 5.8 Hz, 1H), 4.24 (d, 4.8 Hz, 2H), 4.20 (d, 4.8 Hz, 2H), 3.91 (t,  $J$  = 7.6 Hz, 1H), 3.73 (t,  $J$  = 7.6 Hz, 1H), 3.69 – 3.52 (m, 4H), 3.04 (t,  $J$  = 8.3 Hz, 1H), 2.97 (t,  $J$  = 8.3 Hz, 1H), 2.89 (s, 2H), 2.88 – 2.74 (m, 4H), 2.73 (s, 2H), 2.66-2.63 (m, 2H), 2.48 – 2.35 (m, 5H), 2.16 – 2.12 (m, 2H), 2.02 – 1.92 (m, 4H), 1.77 – 1.69 (m, 2H), 1.64 – 1.52 (m, 3H), 1.44 – 1.35 (m, 4H), 1.21 -1.26 (m, 2H), 1.21 (s, 6H), 1.14 (s, 3H), 1.12 (s, 3H), 0.97 (s, 6H), 0.87 (s, 3H), 0.85 (s, 3H).

**$^{13}\text{C}$  NMR (DMSO- $d_6$ , 125 MHz):**  $\delta$  207.43, 170.96, 167.80, 162.79, 139.29, 128.71, 128.27, 127.46, 127.40, 80.34, 78.59, 78.55, 74.29, 74.25, 71.86, 71.82, 67.37, 67.19, 64.27, 59.59, 59.46, 55.71, 55.66, 51.84, 51.72, 48.67, 48.16, 45.87, 45.84, 43.61, 43.45, 42.51, 40.09, 36.84, 36.78, 36.43, 36.26, 36.17, 35.80, 35.34, 34.82, 31.25, 30.84, 27.03, 26.98, 22.19, 20.17, 20.11, 18.61, 18.48.

**HRMS(ESI):**  $m/z$  calc. for  $\text{C}_{33}\text{H}_{44}\text{NO}_7$   $[\text{M}+\text{H}]^+$ : 566.3118, found: 566.3101.

**mp:** 135-136° C.

**Opt. Rot.:**  $[\alpha]_{\text{D}}^{25} = -38$  ( $c$  = 0.13, acetone).

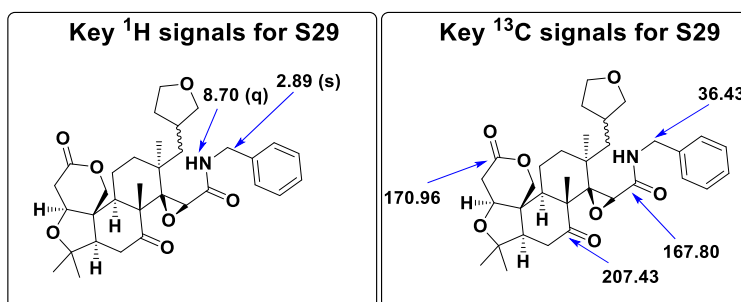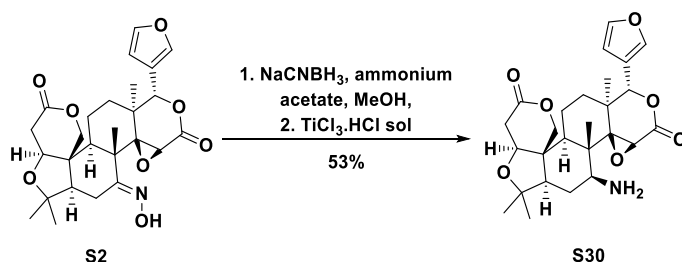

**Procedure:** Ammonium acetate (191 mg, 2.74 mmol) and  $\text{NaCNBH}_3$  (39 mg, 0.62 mmol) were added to a solution of **S2** (100 mg, 0.206 mmol) in methanol (7 mL) at 0° C and the resulting mixture was stirred 0° C for 5 minutes. Hydrochloride solution of  $\text{TiCl}_3$  (1.5 mL) was added dropwise to the reaction and the resulting mixture was stirred at 30° C for 12 h. The reaction was poured into iced water and washed with dichloromethane. The organic layer was discarded and the aqueous layer adjusted to pH 8.5 with sodium hydroxide. The aqueous layer was then extracted three times with dichloromethane. The combined organic layers were washed with brine, dried over  $\text{Na}_2\text{SO}_4$  and concentrated by distillation under reduced pressure to yield a crude residue that was purified by silica gel flash chromatography (dichloromethane –methanol 97:3) to provide **S30** (52 mg, 53%) as a white solid. Spectral data ( $^1\text{H}$  NMR and  $^{13}\text{C}$  NMR) were consistent with literature reported values.<sup>[5]</sup>

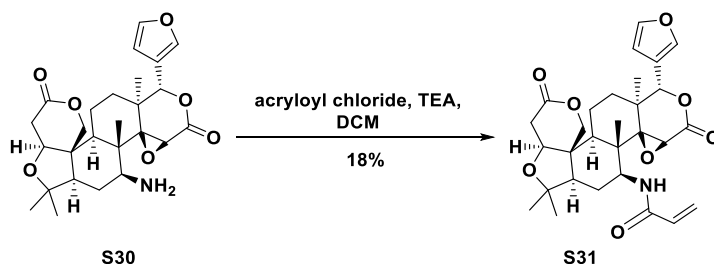

**Procedure:** TEA (88  $\mu\text{L}$ , 0.63 mmol) and acryloyl chloride (18  $\mu\text{L}$ , 0.22 mmol) were added to the solution of **S30** (100 mg, 0.21 mmol) in dichloromethane (5 mL) at 0° C, and the resulting solution was stirred at 30° C for 16 h. Water was added and the aqueous layer was extracted three times with dichloromethane. The combined organic layers were washed with brine and dried over  $\text{Na}_2\text{SO}_4$ . The solvent was concentrated by distillation under reduced pressure to obtain a crude residue that was purified by silica gel flash chromatography (hexane-ethyl acetate 4:6) to provide **S31** (20 mg, 18%) as a white solid.

**$^1\text{H}$  NMR (DMSO- $d_6$ , 500 MHz):**  $\delta$  7.73 (d, 10.1 Hz, 1 H), 7.71 (d,  $J$  = 1.8 Hz, 1H), 7.67 (dd,  $J$  = 1.8, 1.8 Hz, 1H), 6.49 (d,  $J$  = 1.8 Hz, 1H), 6.39 (dd,  $J$  = 17.0, 10.2 Hz, 1H), 6.15 (dd,  $J$  = 17.0, 2.2 Hz, 1H), 5.65 (dd,  $J$  = 10.2, 2.2 Hz, 1H), 5.47 (s, 1H), 4.50 (d,  $J$  = 13.1 Hz, 1H), 4.43 (d,  $J$  = 13.1 Hz, 1H), 4.24 (td,  $J$  = 10.1, 5.0 Hz, 1H), 4.04 (d,  $J$  = 3.8 Hz, 1H), 3.80 (s, 1H), 2.69 (d,  $J$  = 16.5 Hz, 1H), 2.59 (dd,

## SUPPORTING INFORMATION

$J = 16.5, 3.8$  Hz, 1H), 2.43 (dd,  $J = 12.0, 5.1$  Hz, 1H), 2.20 (dd,  $J = 13.0, 3.0$  Hz, 1H), 1.98 – 1.88 (m, 1H), 1.73 – 1.52 (m, 4H), 1.25 (s, 3H), 1.21 – 1.16 (m, 1H), 1.20 (s, 3H), 0.97 (s, 3H), 0.93 (s, 3H).

**$^{13}\text{C}$  NMR (DMSO- $d_6$ , 125 MHz):**  $\delta$  170.74, 167.70, 164.88, 143.84, 142.22, 131.86, 126.63, 120.87, 110.73, 80.32, 79.22, 77.81, 72.41, 65.65, 57.43, 55.59, 55.25, 46.35, 45.58, 42.60, 39.11, 36.18, 30.69, 27.44, 26.79, 21.88, 19.30, 18.02, 15.25.

**HRMS(ESI):**  $m/z$  calc. for  $\text{C}_{29}\text{H}_{36}\text{NO}^8$   $[\text{M}+\text{H}]^+$ : 526.2441, found: 526.426.

**mp:**  $>260^\circ\text{C}$ .

**Opt. Rot.:**  $[\alpha]_{\text{D}}^{25} = -12$  ( $c = 0.13$ , acetone).

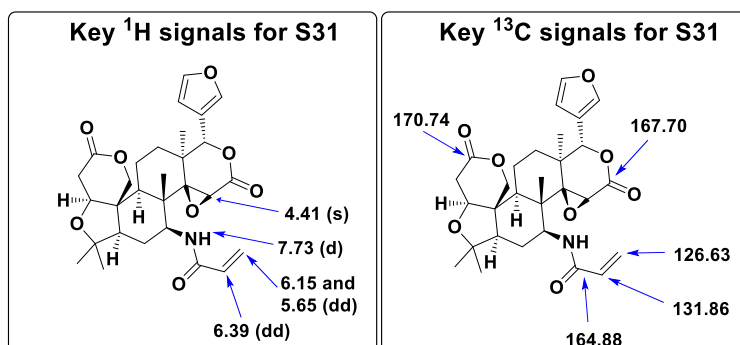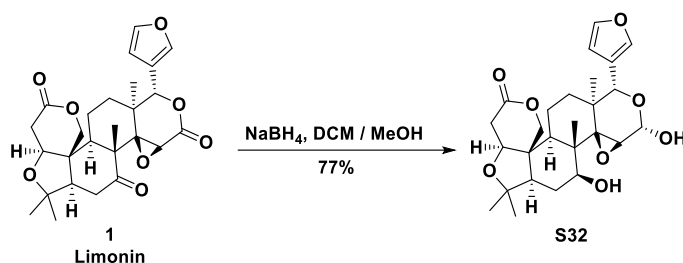

**Procedure:**  $\text{NaBH}_4$  (458 mg, 12.11 mmol) in anhydrous methanol (20 mL) was added to a solution of **1** (1 g, 2.12 mmol) in dichloromethane (40 mL) at  $-5^\circ\text{C}$  and the resulting mixture was stirred at  $-5^\circ\text{C}$ . After 1 hour, the reaction was quenched with 2 M hydrochloric acid and extracted three times with dichloromethane. The organic layers were dried over  $\text{Na}_2\text{SO}_4$  and concentrated by distillation under reduced pressure to obtain a crude residue that was purified by silica gel flash chromatography (hexane-ethyl acetate 4:6) to provide **S32** (771 mg, 77%) as a white solid.

**$^1\text{H}$  NMR (DMSO- $d_6$ , 500 MHz):**  $\delta$  7.56 (dd,  $J = 1.7, 1.7$  Hz, 1H), 7.48 (d,  $J = 1.7$  Hz, 1H), 6.37 (d,  $J = 1.7$  Hz, 1H), 6.33 (d,  $J = 6.4$  Hz, 1H), 5.19 (dd,  $J = 6.4, 2.0$  Hz, 1H), 4.87 (d,  $J = 5.5$  Hz, 1H), 4.83 (s, 1H), 4.48 (d,  $J = 13.0$  Hz, 1H), 4.31 (d,  $J = 13.0$  Hz, 1H), 3.96 (d,  $J = 4.0$  Hz, 1H), 3.81 (d,  $J = 2.0$  Hz, 1H), 3.81 – 3.75 (m, 1H), 2.73 (d,  $J = 16.4$  Hz, 1H), 2.58 (dd,  $J = 16.4, 4.0$  Hz, 1H), 2.21 (dd,  $J = 12.4, 3.5$  Hz, 1H), 1.89 (dd,  $J = 13.4, 2.8$  Hz, 1H), 1.76 – 1.48 (m, 5H), 1.18 (s, 3H), 1.17 (s, 3H), 1.11 – 1.04 (m, 1H), 0.97 (s, 3H), 0.64 (s, 3H).

**$^{13}\text{C}$  NMR (DMSO- $d_6$ , 125 MHz):**  $\delta$  170.86, 142.87, 140.82, 123.99, 111.04, 87.52, 79.97, 79.56, 76.15, 72.19, 67.53, 66.11, 58.37, 56.34, 46.57, 45.71, 44.70, 37.11, 36.37, 30.70, 29.61, 28.97, 21.96, 21.45, 18.55, 13.03.

**HRMS(ESI):**  $m/z$  calc.  $\text{C}_{26}\text{H}_{35}\text{O}_8$   $[\text{M}+\text{H}]^+$ : 475.2332, found: 475.2318.

**mp:**  $164\text{--}165^\circ\text{C}$ .

**Opt. Rot.:**  $[\alpha]_{\text{D}}^{25} = -37$  ( $c = 0.25$ , acetone).

## SUPPORTING INFORMATION

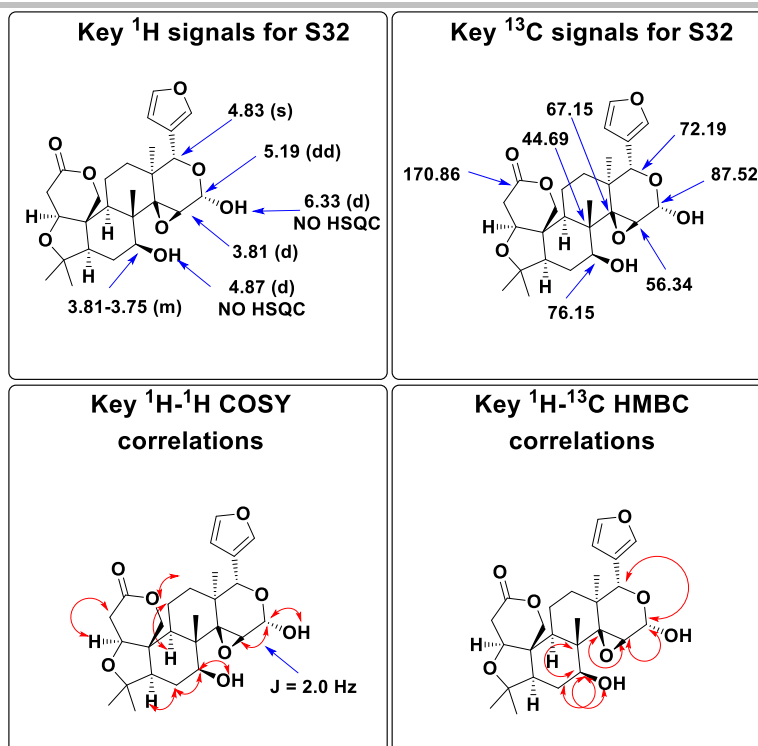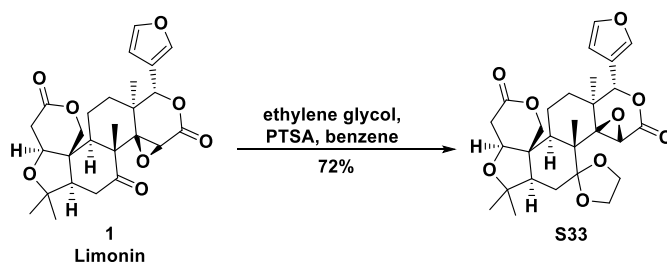

**Procedure:** PTSA (3 mg, 0.02 mmol) and ethylene glycol (14  $\mu\text{L}$ , 0.25 mmol) were added to a solution of **1** (200 mg, 0.42 mmol) in benzene (10 mL) and the resulting solution was refluxed for 48 h with Dean-Stark apparatus. The solvent was evaporated under vacuum and residue was taken up in dichloromethane and water. The aqueous layer was extracted three times with dichloromethane. The combined organic layers were washed with brine, dried over  $\text{Na}_2\text{SO}_4$ , and concentrated by distillation under reduced pressure to obtain a crude residue that was purified by silica gel flash chromatography (hexane-ethyl acetate 4:6) to provide **S33** (156 mg, 72%) as a white solid.

**$^1\text{H}$  NMR (DMSO- $d_6$ , 500 MHz):**  $\delta$  7.71 (d,  $J$  = 1.8 Hz, 1H), 7.66 (dd,  $J$  = 1.8, 1.8 Hz, 1H), 6.49 (d,  $J$  = 1.8, 1H), 5.50 (s, 1H), 4.65 (d,  $J$  = 13.1 Hz, 1H), 4.39 (d,  $J$  = 13.1 Hz, 1H), 4.10 – 3.99 (m, 4H), 3.99 (s, 1H), 3.93 – 3.89 (m, 1H), 2.70 (dd,  $J$  = 16.5, 1.3 Hz, 1H), 2.57 (dd,  $J$  = 16.5, 4.1 Hz, 1H), 2.47 (d,  $J$  = 12.5, 4.9 Hz, 1H), 2.13 (dd,  $J$  = 12.5, 4.0 Hz, 1H), 1.95 – 1.87 (m, 1H), 1.82 – 1.73 (m, 2H), 1.70 – 1.61 (m, 2H), 1.31 – 1.22 (m, 1H), 1.20 (s, 3H), 1.18 (s, 3H), 0.98 (s, 3H), 0.91 (s, 3H).

**$^{13}\text{C}$  NMR (DMSO- $d_6$ , 125 MHz):**  $\delta$  170.75, 168.02, 143.79, 142.29, 120.98, 112.62, 110.80, 79.90, 79.51, 78.10, 68.60, 65.63, 64.30, 62.80, 56.38, 54.14, 46.89, 45.66, 45.53, 38.57, 36.26, 30.68, 27.61, 27.08, 22.07, 18.75, 17.22, 16.94.

**HRMS(ESI):**  $m/z$  calc.  $\text{C}_{28}\text{H}_{35}\text{O}_9$   $[\text{M}+\text{H}]^+$ : 515.2281, found: 515.2277.

**mp:** 255-256  $^\circ\text{C}$ .

**Opt. Rot.:**  $[\alpha]_{\text{D}}^{25}$  = - 58 ( $c$  = 0.21, acetone).



## SUPPORTING INFORMATION

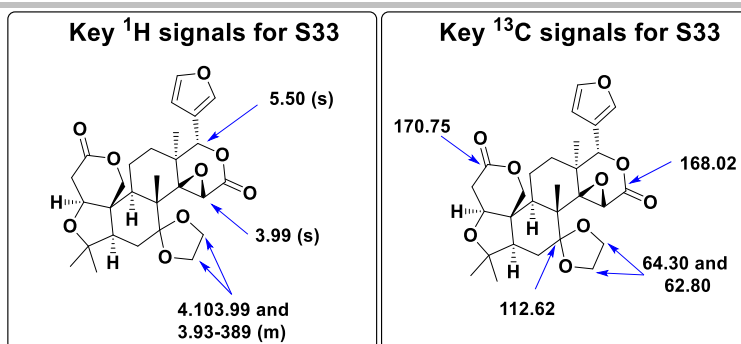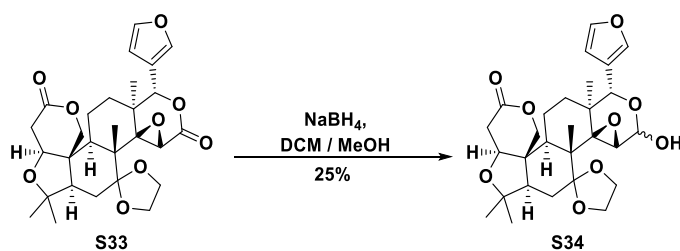

**Procedure:**  $\text{NaBH}_4$  (56 mg, 1.52 mmol) in anhydrous methanol (3 mL) was added to a solution of **S33** (140 mg, 0.27 mmol) in dichloromethane (3 mL) at  $-15^\circ\text{C}$  and the resulting mixture was stirred at  $-15^\circ\text{C}$ . After 30 minutes, the reaction was quenched with 2 M hydrochloric acid and extracted three times with dichloromethane. The combined organic layers were dried over  $\text{Na}_2\text{SO}_4$  and concentrated by distillation under reduced pressure to obtain a crude residue that was purified by silica gel flash chromatography (hexane-ethyl acetate 3:7) to provide **S34** (34 mg, 25%) as a white solid.

**Note:** Compounds **S34** exists as a mixture of two diastereomers (1:1 ratio).

**$^1\text{H}$  NMR (DMSO- $d_6$ , 500 MHz):**  $\delta$  7.27 (d,  $J = 1.9$  Hz, 2H), 7.23 (dd,  $J = 1.9, 1.9$  Hz, 2H), 6.24 (d,  $J = 1.9$  Hz, 1H), 6.21 (d,  $J = 1.9$  Hz, 1H), 5.34 (br s, 1H), 5.19 (br s, 1H), 4.83 (s, 1H), 4.71 (s, 1H), 4.47 (d,  $J = 13.1$  Hz, 2H), 4.24 (dd,  $J = 13.1, 1.5$  Hz, 2H), 4.06 – 3.89 (m, 10H), 3.78 (d,  $J = 2.2$  Hz, 1H), 3.63 (s, 1H), 3.08 (br s, 1H), 2.87 (br s, 1H), 2.85 (dd,  $J = 16.6, 2.8$  Hz, 2H), 2.62 (dd,  $J = 5.1, 3.6$  Hz, 1H), 2.60 (dd,  $J = 5.1, 3.6$  Hz, 1H), 2.56 (d,  $J = 16.6$  Hz, 2H), 2.20 (td,  $J = 14.2, 2.9$  Hz, 2H), 1.74 – 1.66 (m, 4H), 1.61 – 1.52 (m, 6H), 1.37 (s, 3H), 1.35 – 1.26 (m, 2H), 1.24 (s, 3H), 1.20 (s, 6H), 1.04 (s, 6H), 0.84 (s, 3H), 0.82 (s, 3H).

**$^{13}\text{C}$  NMR (DMSO- $d_6$ , 125 MHz):**  $\delta$  170.03, 169.96, 142.41, 142.36, 140.53, 140.50, 122.91, 122.88, 112.69, 112.52, 110.17, 110.14, 89.90, 87.83, 80.28, 80.25, 79.88, 79.85, 72.59, 72.28, 67.23, 66.07, 66.01, 64.91, 64.63, 63.40, 63.31, 56.71, 56.25, 55.93, 47.94, 47.69, 45.62, 45.34, 44.99, 37.88, 36.83, 36.04, 36.02, 30.20, 29.13, 29.02, 28.94, 28.72, 21.51, 21.06, 20.82, 18.26, 18.22, 16.83, 16.74.

**HRMS(ESI):**  $m/z$  calc.  $\text{C}_{28}\text{H}_{37}\text{O}_9$   $[\text{M}+\text{H}]^+$ : 517.2438, found: 517.2451.

**Opt. Rot.:**  $[\alpha]_{\text{D}}^{25} = -189$  ( $c = 0.13$ , acetone).

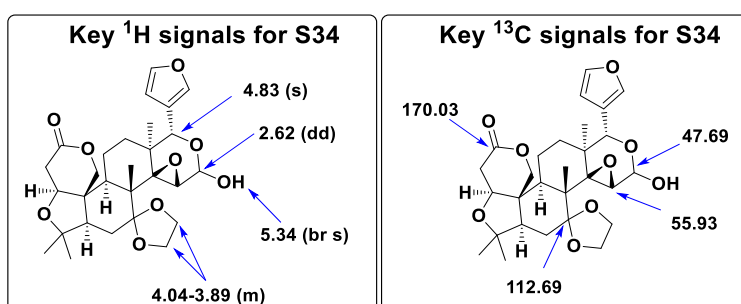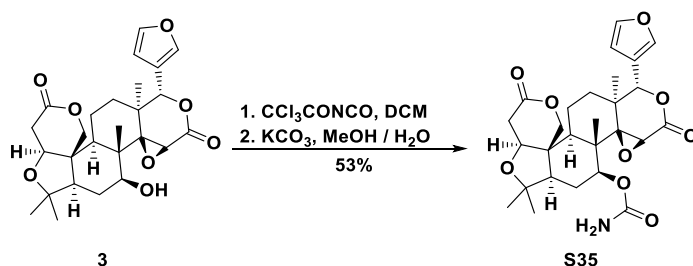

## SUPPORTING INFORMATION

**Procedure:** Trichloro acetyl isocyanate (90  $\mu$ L, 0.75 mmol) was added at 0° C to a solution of **3** (300 mg, 0.60 mmol) in dichloromethane (3 mL) and the resulting mixture was stirred at 30° C for 2 h. The reaction was concentrated under vacuum and residue taken up in methanol (1.5 mL) and treated with KCO<sub>3</sub> saturated aqueous solution (2 mL). The resulting mixture was stirred at 30° C for an additional 16 h. Methanol was evaporated and the aqueous layer acidified with 0.5 N hydrochloric acid to pH 2 and extracted three times with dichloromethane. The organic layers were combined, washed with brine, dried over Na<sub>2</sub>SO<sub>4</sub>, and concentrated by distillation under reduced pressure. The crude residue was purified by biotage (water-acetonitrile gradient with 1% of formic acid) to provide **S35** (164 mg, 53%) as a white solid.

**<sup>1</sup>H NMR (DMSO-*d*<sub>6</sub>, 500 MHz):**  $\delta$  7.72 (d, *J* = 1.8 Hz, 1H), 7.67 (dd, *J* = 1.8, 1.8 Hz, 1H), 6.72 (br s, 1H), 6.60 (br s, 1H), 6.50 (d, *J* = 1.8 Hz, 1H), 5.51 (s, 1H), 4.76 (dd, *J* = 10.2, 5.0 Hz, 1H), 4.59 (d, *J* = 13.1 Hz, 1H), 4.44 (d, *J* = 13.1 Hz, 1H), 4.01 (d, *J* = 3.9 Hz, 1H), 3.72 (s, 1H), 2.67 (d, *J* = 16.6, 1H), 2.57 (dd, *J* = 16.4, 3.9 Hz, 1H), 2.38 (dd, *J* = 12.0, 4.9 Hz, 1H), 2.14 (dd, *J* = 13.8, 2.5 Hz, 1H), 2.01 – 1.90 (m, 1H), 1.82 (ddd, *J* = 12.7, 5.2, 2.4 Hz, 1H), 1.73 – 1.58 (m, 3H), 1.22 (s, 3H), 1.23 – 1.20 (m, 1H), 1.18 (s, 3H), 0.97 (s, 3H), 0.93 (s, 3H).

**<sup>13</sup>C NMR (DMSO-*d*<sub>6</sub>, 125 MHz):**  $\delta$  170.75, 167.77, 156.26, 143.86, 142.33, 120.77, 110.76, 80.13, 79.18, 78.26, 77.88, 72.10, 65.66, 56.32, 55.39, 55.08, 45.59, 45.54, 43.02, 36.14, 30.66, 27.15, 25.11, 21.97, 19.17, 17.64, 14.69.

**HRMS(ESI):** *m/z* calc. for C<sub>27</sub>H<sub>34</sub>NO<sub>9</sub> [M+H]<sup>+</sup>: 516.2234, found: 516.2242.

**mp:** 212-213° C.

**Opt. Rot.:** [ $\alpha$ ]<sub>D</sub><sup>25</sup> = + 2 (c = 0.26, acetone).

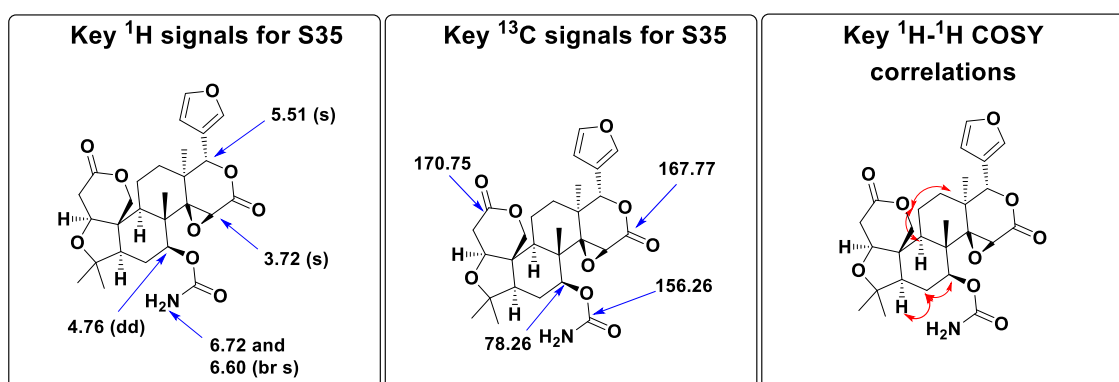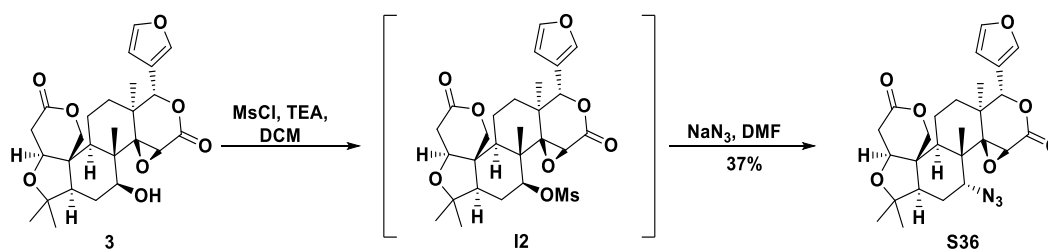**I2**

**Procedure:** MsCl (151  $\mu$ L, 1.50 mmol) was added to a solution of **3** (710 mg, 1.50 mmol) in dichloromethane (40 mL) and triethylamine (627  $\mu$ L, 4.5 mmol) at 0° C and the resulting mixture was stirred at 30° C for 24 h. Water was added and the aqueous layer was extracted three times with dichloromethane. The organic layers were combined, washed with brine, dried over Na<sub>2</sub>SO<sub>4</sub>, and concentrated by distillation under reduced pressure to provide crude **I2** that was used for next step without further purification.

**S36**

**Procedure:** NaN<sub>3</sub> (151 mg, 1.50 mmol) was added to a solution of crude **I2** (1.50 mmol) in DMF (10 mL) and the resulting mixture was stirred at 110° C for 72 h. The reaction was cooled to room temperature, and the solvent removed under vacuum to obtain a crude residue that was taken up with water. Water was extracted three times with dichloromethane and the organic layers were combined, washed with brine, dried over Na<sub>2</sub>SO<sub>4</sub> and concentrated by distillation under reduced pressure. The crude residue was purified by silica gel flash chromatography (hexane-ethyl acetate 4:6) to provide **S36** (274 mg, 37%) as a white solid.

**<sup>1</sup>H NMR (DMSO-*d*<sub>6</sub>, 500 MHz):**  $\delta$  7.70 (d, *J* = 1.7 Hz, 1H), 7.67 (dd, *J* = 1.7, 1.7 Hz, 1H), 6.49 (d, *J* = 1.7 Hz, 1H), 5.51 (s, 1H), 4.61 (d, *J* = 13.2 Hz, 1H), 4.42 (d, *J* = 13.2 Hz, 1H), 4.18 (s, 1H), 4.08 (d, *J* = 3.7 Hz, 1H), 3.92 (d, *J* = 2.7 Hz, 1H), 2.63 (d, *J* = 16.5 Hz, 1H), 2.57 (dd, *J* = 16.5, 3.7 Hz, 1H), 2.46 (dd, *J* = 12.8, 6.6 Hz, 1H), 2.23 (dd, *J* = 13.6, 2.3 Hz, 1H), 2.09 (ddd, *J* = 14.7, 13.6, 2.7 Hz, 1H),

## SUPPORTING INFORMATION

1.99 – 1.91 (m, 1H), 1.82 (ddd,  $J = 14.7, 2.7, 2.3$  Hz, 1H), 1.71 – 1.54 (m, 2H), 1.28 – 1.24 (m, 1H), 1.21 (s, 3H), 1.20 (s, 3H), 1.02 (s, 3H), 0.83 (s, 3H).

$^{13}\text{C}$  NMR (DMSO- $d_6$ , 125 MHz):  $\delta$  170.65, 167.67, 143.84, 142.29, 120.90, 110.77, 80.27, 79.64, 78.25, 69.57, 65.77, 63.55, 56.81, 53.47, 45.82, 43.27, 42.73, 38.14, 36.11, 30.94, 25.99, 22.22, 21.91, 18.77, 17.69, 16.65.

HRMS(ESI):  $m/z$  calc. for  $\text{C}_{26}\text{H}_{32}\text{N}_3\text{O}_7$   $[\text{M}+\text{H}]^+$ : 498.2240, found: 498.2245.

mp:  $>260^\circ\text{C}$ .

Opt. Rot.:  $[\alpha]_{\text{D}}^{25} = -72$  ( $c = 0.19$ , acetone).

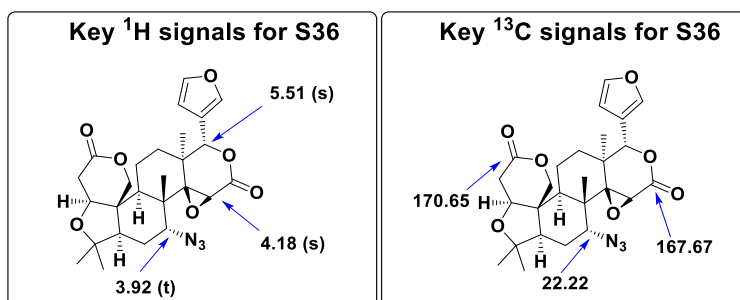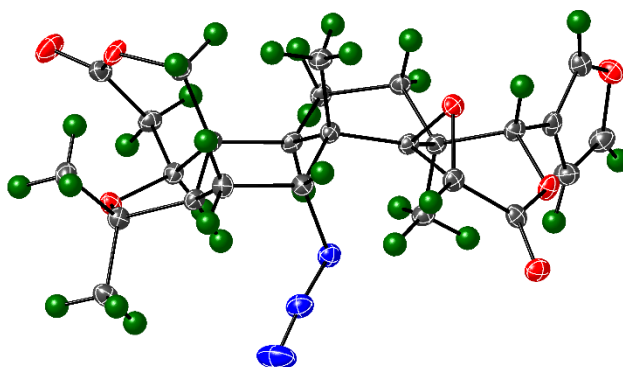

## Crystallography

**Experimental Protocol:** Intensity data were collected on a Bruker D8 Venture kappa diffractometer equipped with a Photon 100 CMOS detector. An  $\mu\text{s}$  microfocus Mo source ( $\lambda = 0.71073$  Å) coupled with a multi-layer mirror monochromator provided the incident beam. The sample was mounted on a 0.3 mm loop with the minimal amount of Paratone-N oil. Data was collected as a series of  $\varphi$  and/or  $\omega$  scans. Data was collected at 100 K using a cold stream of  $\text{N}_2(\text{g})$ . The collection, cell refinement, and integration of intensity data was carried out with the APEX3 software.<sup>1</sup> A semi-empirical absorption correction was performed with SADABS.<sup>2</sup> The structure was phased with intrinsic methods using SHELXT<sup>3</sup> and refined with the full-matrix least-squares program SHELXL.<sup>4</sup>

CCDC: 2082417

(1) Bruker (2016). APEX3. Bruker AXS, Inc., Madison, Wisconsin, USA.

(2) L. Krause, R. Herbst-Irmer, G. M. Sheldrick, D. Stalke, *J. Appl. Cryst.*, **2015**, *48*, 3–10.

(3) G. M. Sheldrick, *Acta Cryst.* **2015**, A71, 3–8.

(4) G. M. Sheldrick, *Acta Cryst.* **2015**, C71, 3–8.

**Table S9.** Crystal data and structure refinement for dd44xs.

Identification code dd44xs  
 Empirical formula  $\text{C}_{27}\text{H}_{33}\text{Cl}_2\text{N}_3\text{O}_7$   
 Formula weight 582.46  
 Temperature 100(2) K

## SUPPORTING INFORMATION

Wavelength 1.54178 Å  
 Crystal system Monoclinic  
 Space group  $P2_1$   
 Unit cell dimensions  $a = 10.1144(6)$  Å  $a = 90^\circ$ .  
 $b = 10.3094(6)$  Å  $b = 91.8653(7)^\circ$ .  
 $c = 12.8229(7)$  Å  $c = 90^\circ$ .  
 Volume 1336.38(13) Å<sup>3</sup>  
 Z 2  
 Density (calculated) 1.447 Mg/m<sup>3</sup>  
 Absorption coefficient 2.630 mm<sup>-1</sup>  
 F(000) 612  
 Crystal size 0.422 x 0.405 x 0.172 mm<sup>3</sup>  
 Theta range for data collection 3.448 to 74.801°.  
 Index ranges  $-12 \leq h \leq 12$ ,  $-12 \leq k \leq 12$ ,  $-16 \leq l \leq 16$   
 Reflections collected 49300  
 Independent reflections 5410 [R(int) = 0.0288]  
 Completeness to theta = 67.679° 99.9 %  
 Absorption correction Semi-empirical from equivalents  
 Max. and min. transmission 0.7538 and 0.6012  
 Refinement method Full-matrix least-squares on F<sup>2</sup>  
 Data / restraints / parameters 5410 / 1 / 357  
 Goodness-of-fit on F<sup>2</sup> 1.029  
 Final R indices [ $I > 2\sigma(I)$ ] R1 = 0.0292, wR2 = 0.0807  
 R indices (all data) R1 = 0.0292, wR2 = 0.0808  
 Absolute structure parameter 0.002(3)  
 Extinction coefficient 0.0017(4)  
 Largest diff. peak and hole 0.510 and -0.420 e.Å<sup>-3</sup>

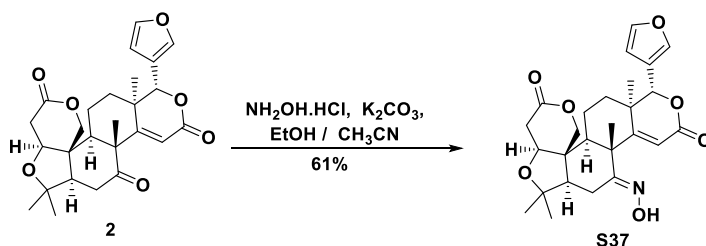

**Procedure:** Hydroxylamine hydrochloride (34 mg, 0.48 mmol) was added to a solution of **2** (200 mg, 0.44 mmol) and  $\text{K}_2\text{CO}_3$  (76 mg, 0.55 mmol) in ethanol (4.4 mL) and acetonitrile (4.4 mL), and the resulting mixture was heated under reflux for 4 h. After completion, the reaction was cooled to room temperature, the solid filtered off, and the filtrate concentrate under vacuum. The crude residue was taken up with dichloromethane and washed with brine. The organic layer was dried over  $\text{Na}_2\text{SO}_4$  and concentrated by distillation under reduced pressure to yield a crude residue that was purified by silica gel flash chromatography (hexane–ethyl acetate 4:6) to provide **S37** (127 mg, 61%) as a white solid. Spectral data (<sup>1</sup>H NMR) was consistent with literature reported values.<sup>[1]</sup>

**Note:** The hydroxy group on the C=N double bond of **S37** adopts the *E* configuration.

**<sup>1</sup>H NMR (DMSO-*d*<sub>6</sub>, 500 MHz):**  $\delta$  11.15 (s, 1H), 7.75 (d,  $J = 1.7$  Hz, 1H), 7.70 (dd,  $J = 1.7, 1.7$  Hz, 1H), 6.63 (s, 1H), 6.56 (d,  $J = 1.7$  Hz, 1H), 5.14 (s, 1H), 4.59 (d,  $J = 13.0$  Hz, 1H), 4.51 (d,  $J = 13.0$  Hz, 1H), 4.12 (d,  $J = 3.7$  Hz, 1H), 3.23 (dd,  $J = 16.3, 4.1$  Hz, 1H), 2.68 (dd,  $J = 16.3$  Hz, 1H), 2.59 (dd,  $J = 16.3, 3.7$  Hz, 1H), 2.41 (dd,  $J = 12.6, 6.5$  Hz, 1H), 2.31 (dd,  $J = 16.3, 14.9$  Hz, 1H), 2.07 – 2.02 (m, 2H), 1.72– 1.66 (m, 2H), 1.34 (s, 3H), 1.21– 1.18 (m, 1H), 1.19 (s, 6H), 1.04 (s, 3H).

**<sup>13</sup>C NMR (DMSO-*d*<sub>6</sub>, 125 MHz):**  $\delta$  170.87 165.41, 160.15, 143.76, 142.27, 120.75, 117.18, 110.85, 81.51, 80.55, 78.34, 64.73, 56.80, 46.01, 45.82, 45.29, 40.42, 38.43, 36.21, 30.78, 28.82, 26.35, 22.12, 20.51, 20.30, 17.07.

**HRMS(ESI):**  $m/z$  calc. for  $\text{C}_{26}\text{H}_{32}\text{NO}_7$  [M+H]<sup>+</sup>: 486.2130, found: 486.2128.

**mp:** >260° C.

**Opt. Rot.:**  $[\alpha]_D^{25} = -41$  ( $c = 0.12$ , acetone).

## SUPPORTING INFORMATION

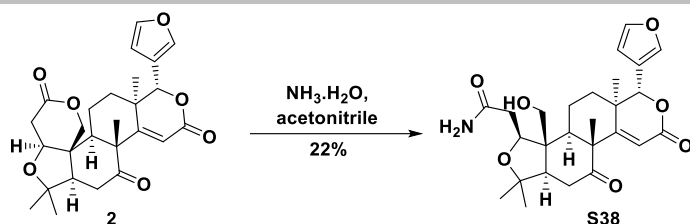

**Procedure:** Ammonium hydroxide (2 mL) was added dropwise to a solution of **2** (96 mg, 0.21 mmol) in acetonitrile (3 mL) at 0° C and the resulting mixture was stirred at 30° C for 8 h. The reaction mixture was diluted with water, acidified with 2 M hydrochloric acid, and extracted three times with dichloromethane. The combined organic layers were washed with brine, dried over Na<sub>2</sub>SO<sub>4</sub> and concentrated by distillation under reduced pressure to yield a crude residue that was purified by silica gel flash chromatography (dichloromethane-methanol 97:3) to provide **S38** (22 mg, 22%) as a white solid. Spectral data (<sup>1</sup>H NMR and <sup>13</sup>C NMR) were consistent with literature reported values.<sup>[6]</sup>

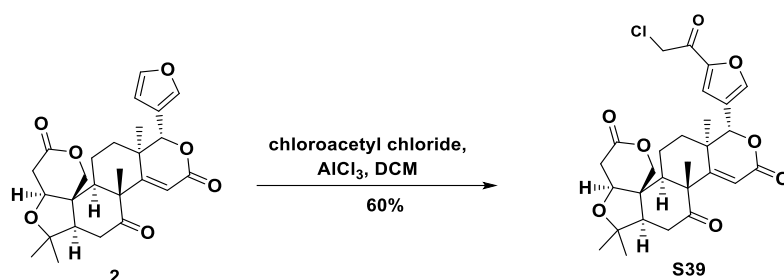

**Procedure:** AlCl<sub>3</sub> (132 mg, 0.99 mmol) was added at 0° C to a cooled solution of **2** (100 mg, 0.22 mmol) in dichloromethane (4 mL). The resulting mixture was stirred 30 minutes, before chloroacetyl chloride (21 μL, 0.26 mmol) was added to the solution, and the resulting mixture was stirred at 30° C for 15 h. Water was added and the aqueous layer was extracted three times with dichloromethane. The combined organic layers were washed with 2 M sodium hydroxide and brine. After drying over Na<sub>2</sub>SO<sub>4</sub>, the solution was concentrated by distillation at reduced pressure, and the residue was purified by flash chromatography on silica gel (hexane-ethyl acetate 4:6), giving **S39** (70 mg, 60%) as a white solid. Spectral data (<sup>1</sup>H NMR) was consistent with literature reported values.<sup>[7]</sup>

**<sup>1</sup>H NMR (CDCl<sub>3</sub>, 500 MHz):** δ 7.70 (d, *J* = 0.8 Hz, 1H), 7.30 (d, *J* = 0.8 Hz, 1H), 6.87 (s, 1H), 5.03 (s, 1H), 4.68 (d, *J* = 13.1 Hz, 1H), 4.56 (d, *J* = 13.1 Hz, 1H), 4.56 (d, *J* = 2.0 Hz, 2H), 4.10 (t, *J* = 3.6 Hz, 1H), 2.98 (dd, *J* = 16.9, 3.6 Hz, 1H), 2.82 (t, *J* = 15.9 Hz, 1H), 2.63 (dd, *J* = 15.9, 2.2 Hz, 1H), 2.59 (dd, *J* = 16.9, 3.6 Hz, 1H), 2.51 (dd, *J* = 12.6, 7.3 Hz, 1H), 2.28 (dd, *J* = 15.9, 2.2 Hz, 1H), 2.16 – 2.02 (m, 1H), 1.90 – 1.82 (m, 1H), 1.68 – 1.62 (m, 1H), 1.58 – 1.55 (m, 1H), 1.41 (s, 3H), 1.30 (s, 3H), 1.22 (s, 3H), 1.19 (s, 3H).

**<sup>13</sup>C NMR (CDCl<sub>3</sub>, 125 MHz):** δ 205.22, 180.38, 168.95, 165.30, 164.02, 150.73, 145.45, 123.14, 118.04, 117.70, 81.44, 80.61, 78.71, 64.59, 58.30, 50.81, 45.59, 44.94, 44.41, 38.44, 36.58, 35.38, 30.45, 26.70, 25.91, 21.74, 19.89, 17.72.

**HRMS(ESI):** *m/z* calc. for C<sub>28</sub>H<sub>32</sub>O<sub>8</sub>Cl [M+H]<sup>+</sup>: 531.1786, found: 531.1788.

**Opt. Rot.:** [α]<sub>D</sub><sup>25</sup> = - 4 (c = 0.10, acetone).

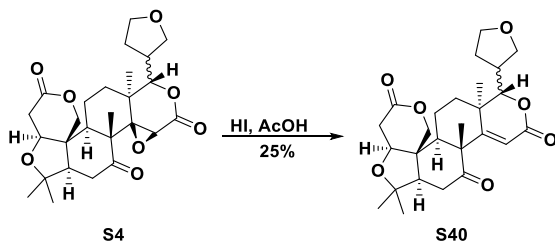

**Procedure:** A solution of **S4** (125 mg, 0.27 mmol) in acetic acid (2 mL) and hydriodic acid (2 mL) was heated under reflux for 1.30 h. The reaction mixture was cooled to room temperature and slowly poured into 400 mL of sodium sulfite saturated solution and extracted three times with dichloromethane. The organic layers were combined, washed with brine, dried over Na<sub>2</sub>SO<sub>4</sub> and concentrated by distillation under reduced pressure. The crude residue was purified by silica gel flash chromatography (ethyl acetate) to provide **S40** (30 mg, 25%) as a white solid.

**Note:** Compound **S40** is known,<sup>[2]</sup> however **S40** has never been fully characterized. **S40**, as its starting material, exists has two diastereoisomers (1:1 ratio).

**<sup>1</sup>H NMR (DMSO-*d*<sub>6</sub>, 500 MHz):** δ 6.58 (s, 2H), 4.91 (d, *J* = 13.1 Hz, 2H), 4.66 (dd, *J* = 13.1, 3.5 Hz, 2H), 4.22 (d, *J* = 3.7 Hz, 2H), 4.17 (d, *J* = 5.9 Hz, 1H), 4.05 (d, *J* = 5.2 Hz, 1H), 3.94 (t, *J* = 8.2, 1H), 3.94 (t, *J* = 8.6, 1H), 3.79 – 3.74 (m 2H), 3.72 – 3.66 (m, 2H), 3.58 (t,

## SUPPORTING INFORMATION

$J = 8.6$  Hz, 1H), 3.40 (t,  $J = 8.2$  Hz, 1H), 3.20 (t,  $J = 15.6$  Hz, 2H), 2.78 (d,  $J = 16.3$  Hz, 2H), 2.71 (d,  $J = 4.0$  Hz, 1H), 2.68 (d,  $J = 4.3$  Hz, 1H), 2.66 – 2.60 (m, 4H), 2.44 (dd,  $J = 15.6$ , 3.4 Hz, 2H), 2.27 – 2.12 (m, 2H), 2.09 – 2.17 (m, 2H), 1.98 – 1.88 (m, 1H), 1.84 – 1.71 (m, 5H), 1.68 – 1.45 (m, 4H), 1.30 (s, 3H), 1.29 (s, 3H), 1.25 (s, 6H), 1.24 (s, 6H), 1.08 (s, 6H).

**$^{13}\text{C}$  NMR (DMSO- $d_6$ , 125 MHz):**  $\delta$  208.14, 208.10, 170.77, 168.29, 168.23, 165.25, 165.13, 116.99, 116.80, 87.74, 86.09, 80.24, 78.58, 70.54, 69.02, 67.85, 67.49, 64.67, 60.23, 56.58, 56.53, 50.99, 50.96, 45.67, 42.78, 42.72, 38.84, 38.76, 38.71, 38.69, 36.93, 36.12, 31.01, 30.37, 28.54, 26.26, 25.67, 25.23, 21.96, 19.87, 19.69, 16.83, 16.80.

**HRMS(ESI):**  $m/z$  calc. for  $\text{C}_{26}\text{H}_{35}\text{O}_7$   $[\text{M}+\text{H}]^+$ : 459.2383, found: 459.2389.

**mp:**  $>260^\circ\text{C}$ .

**Opt. Rot.:**  $[\alpha]_{\text{D}}^{25} = -95$  ( $c = 0.21$ , acetone).

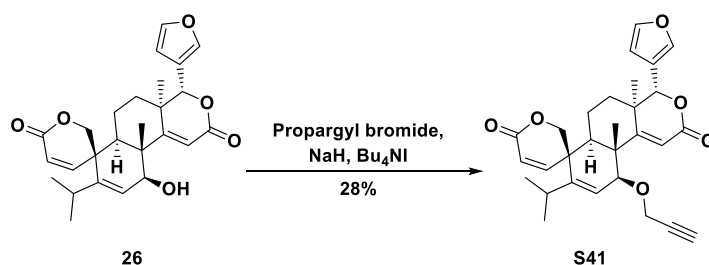

**Procedure:** NaH (60% dispersion in mineral oil) (10 mg, 0.44 mmol) and propargyl bromide (32  $\mu\text{L}$ , 0.44 mmol) were added at  $0^\circ\text{C}$  to a cooled solution of **26** (96 mg, 0.22 mmol) and tetrabutylammonium iodide (48 mg, 0.02 mmol) in THF (2 mL). The resulting solution was stirred at  $30^\circ\text{C}$  for 12 h. Sat. aq  $\text{NH}_4\text{Cl}$  solution (20 mL) was added and the aqueous layer was extracted three times with dichloromethane. The combined organic layers were washed with brine. After drying over  $\text{Na}_2\text{SO}_4$ , the solution was concentrated by distillation at reduced pressure, and the residue was purified by flash chromatography on silica gel (hexane-ethyl acetate 6:4) to obtain **S41** (30 mg, 28%) as a white solid.

**$^1\text{H}$  NMR (CDCl $_3$ , 500 MHz):**  $\delta$  7.48 (d,  $J = 1.7$  Hz, 1H), 7.42 (dd,  $J = 1.7$ , 1.7 Hz, 1H), 6.60 (s, 1H), 6.43 (d,  $J = 1.7$  Hz, 1H), 6.24 (dd,  $J = 9.9$ , 1.7 Hz, 1H), 6.16 (d,  $J = 9.9$  Hz, 1H), 5.80 (d,  $J = 1.7$  Hz, 1H), 5.04 (s, 1H), 4.69 (dd,  $J = 12.6$ , 1.7 Hz, 1H), 4.50 (d,  $J = 12.6$  Hz, 1H), 4.31 (d,  $J = 2.3$  Hz, 2H), 4.02 (d,  $J = 1.7$  Hz, 1H), 2.48 (t,  $J = 2.3$  Hz, 1H), 2.28 (hept,  $J = 6.8$  Hz, 1H), 1.91 (dd,  $J = 11.9$ , 4.6 Hz, 1H), 1.83 – 1.69 (m, 3H), 1.46 (ddd,  $J = 13.7$ , 9.0, 7.5 Hz, 1H), 1.23 (s, 3H), 1.21 (s, 3H), 1.12 (d,  $J = 6.8$  Hz, 3H), 1.09 (d,  $J = 6.8$  Hz, 3H).

**$^{13}\text{C}$  NMR (CDCl $_3$ , 125 MHz):**  $\delta$  170.89, 165.18, 162.54, 150.90, 145.97, 143.02, 141.34, 124.33, 122.55, 120.08, 118.31, 110.07, 81.41, 80.64, 79.10, 75.60, 69.29, 57.13, 44.80, 42.08, 40.46, 37.58, 29.59, 29.39, 25.15, 25.12, 22.20, 17.74, 17.64.

**HRMS(ESI):**  $m/z$  calc. for  $\text{C}_{29}\text{H}_{33}\text{O}_6$   $[\text{M}+\text{H}]^+$ : 477.2277, found: 477.2274.

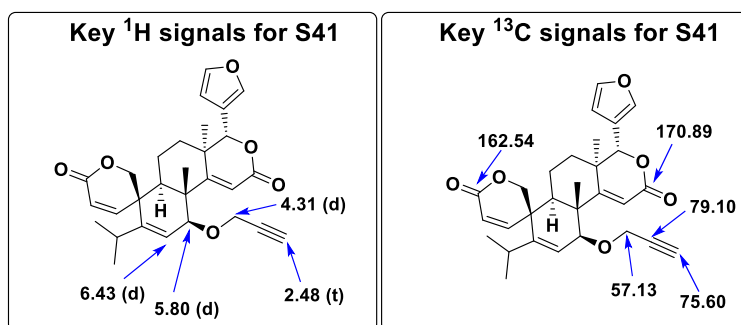

## SUPPORTING INFORMATION

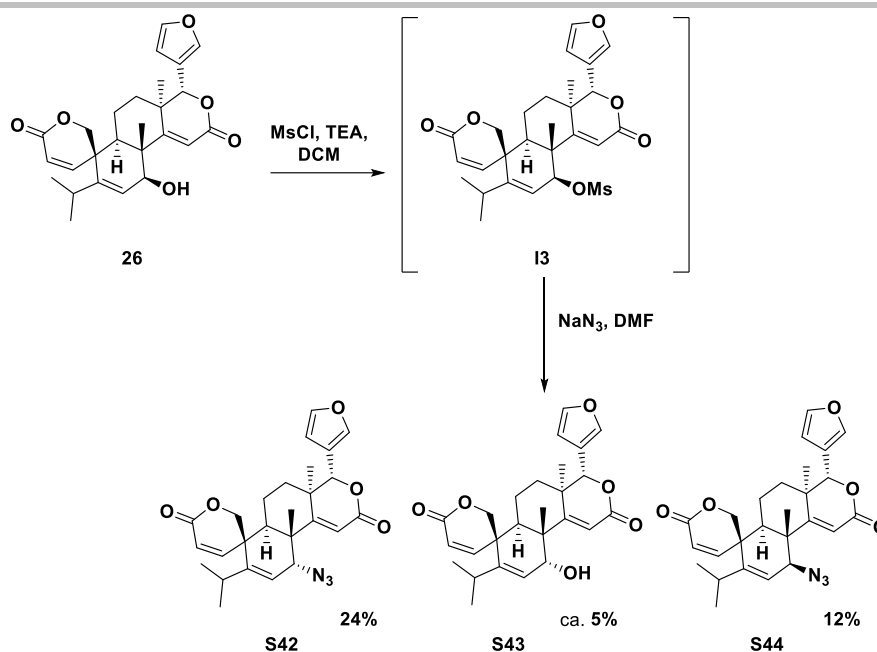**I3**

**Procedure:**  $\text{MsCl}$  (27  $\mu\text{L}$ , 0.35 mmol) was added to a solution of **26** (116 mg, 0.27 mmol) in dichloromethane (6 mL) and triethylamine (111  $\mu\text{L}$ , 0.80 mmol) at 0° C and the resulting mixture was stirred at 30° C for 2 h. Water was added and the aqueous layer was extracted three times with dichloromethane. The organic layers were combined, washed with brine, dried over  $\text{Na}_2\text{SO}_4$ , and concentrated by distillation under reduced pressure to provide crude **I3** that was used for next step without further purification.

**S42-S44**

**Procedure:**  $\text{NaN}_3$  (60 mg, 0.27 mmol) was added to a solution of crude **I3** (0.27 mmol) in DMF (2 mL) and the resulting mixture was stirred at 110° C for 12 h. The reaction was cooled to room temperature, and the solvent removed under vacuum to obtain a crude residue that was taken up with water. Water was extracted three times with dichloromethane and the organic layers were combined, washed with brine, dried over  $\text{Na}_2\text{SO}_4$  and concentrated by distillation under reduced pressure. The crude residue was purified by silica gel flash chromatography (hexane-ethyl acetate 1:1) to provide **S42** (29 mg, 24%) and the epimerization products **S43** (6 mg, ca. 5%) and **S44** (15 mg, 12%), as white solids.

**S42** (29 mg, 24%)

**$^1\text{H}$  NMR ( $\text{CDCl}_3$ , 125 MHz):**  $\delta$  7.47 (d,  $J = 1.8$  Hz, 1H), 7.41 (dd,  $J = 1.8, 1.8$  Hz, 1H), 6.40 (d,  $J = 1.8$  Hz, 1H), 6.32 (dd,  $J = 9.9, 2.1$  Hz, 1H), 6.15 (d,  $J = 9.9$  Hz, 1H), 6.06 (d,  $J = 6.2$  Hz, 1H), 5.91 (s, 1H), 5.00 (s, 1H), 4.64 (dd,  $J = 12.7, 2.1$  Hz, 1H), 4.53 (d,  $J = 12.7$  Hz, 1H), 4.04 (d,  $J = 6.2$  Hz, 1H), 2.36 (hept,  $J = 6.8$  Hz, 1H), 2.29 (dd,  $J = 12.5, 7.4$  Hz, 1H), 2.08 – 2.00 (m, 1H), 1.91 – 1.79 (m, 1H), 1.61 – 1.54 (m, 2H), 1.27 (s, 3H), 1.16 (s, 3H), 1.15 (d,  $J = 6.8$  Hz, 3H), 1.13 (d,  $J = 6.8$  Hz, 3H).

**$^{13}\text{C}$  NMR ( $\text{CDCl}_3$ , 125 MHz):**  $\delta$  171.89, 164.93, 162.08, 151.37, 149.91, 143.08, 141.27, 122.11, 120.55, 119.93, 115.38, 109.98, 82.20, 68.75, 62.91, 45.26, 42.59, 37.72, 34.19, 30.29, 26.63, 25.92, 24.93, 24.57, 18.35, 15.66.

**HRMS(ESI):**  $m/z$  calc. for  $\text{C}_{26}\text{H}_{30}\text{N}_3\text{O}_5$  [ $\text{M}+\text{H}$ ] $^+$ : 464.2179, found: 464.2178.

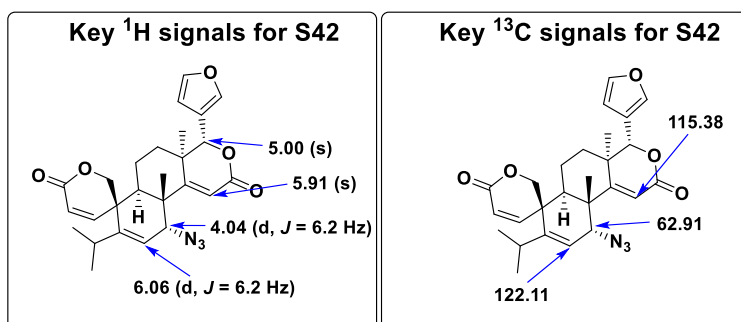

## SUPPORTING INFORMATION

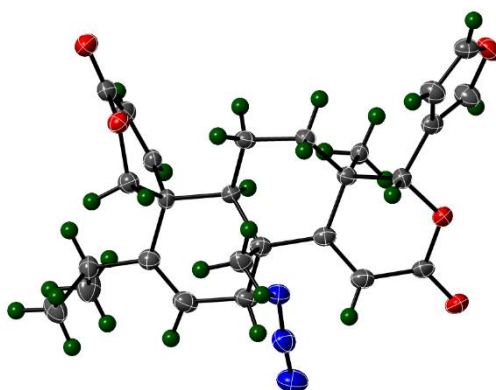

## Crystallography

**Experimental Protocol:** Intensity data were collected on a Bruker D8 Venture kappa diffractometer equipped with a Photon 100 CMOS detector. An I $\mu$ s microfocus Mo source ( $\lambda = 0.71073 \text{ \AA}$ ) coupled with a multi-layer mirror monochromator provided the incident beam. The sample was mounted on a 0.3 mm loop with the minimal amount of Paratone-N oil. Data was collected as a series of  $\varphi$  and/or  $\omega$  scans. Data was collected at 100 K using a cold stream of N<sub>2</sub>(g). The collection, cell refinement, and integration of intensity data was carried out with the APEX3 software.<sup>1</sup> A semi-empirical absorption correction was performed with SADABS.<sup>2</sup> The structure was phased with intrinsic methods using SHELXT<sup>3</sup> and refined with the full-matrix least-squares program SHELXL.<sup>4</sup>

CCDC: 2082418

- (1) Bruker (2016). APEX3. Bruker AXS, Inc., Madison, Wisconsin, USA.
- (2) L. Krause, R. Herbst-Irmer, G. M. Sheldrick, D. Stalke, *J. Appl. Cryst.*, **2015**, *48*, 3–10.
- (3) G. M. Sheldrick, *Acta Cryst.* **2015**, *A71*, 3–8.
- (4) G. M. Sheldrick, *Acta Cryst.* **2015**, *C71*, 3–8.

## Table S10

Crystal data and structure refinement for ed06es.

Identification code ed06es  
 Empirical formula C<sub>26</sub> H<sub>29</sub> N<sub>3</sub> O<sub>5</sub>  
 Formula weight 463.52  
 Temperature 100(2) K  
 Wavelength 1.54178 Å  
 Crystal system Orthorhombic  
 Space group P2<sub>1</sub>2<sub>1</sub>2<sub>1</sub>  
 Unit cell dimensions a = 8.3769(6) Å a = 90°.  
                   b = 9.5428(7) Å b = 90°.  
                   c = 29.023(2) Å g = 90°.  
 Volume 2320.1(3) Å<sup>3</sup>  
 Z 4  
 Density (calculated) 1.327 Mg/m<sup>3</sup>  
 Absorption coefficient 0.758 mm<sup>-1</sup>  
 F(000) 984  
 Crystal size 0.302 x 0.257 x 0.156 mm<sup>3</sup>  
 Theta range for data collection 3.045 to 69.296°.  
 Index ranges -10 ≤ h ≤ 10, -11 ≤ k ≤ 11, -34 ≤ l ≤ 35  
 Reflections collected 45838  
 Independent reflections 4289 [R(int) = 0.0707]  
 Completeness to theta = 67.679° 99.9 %  
 Absorption correction Semi-empirical from equivalents  
 Max. and min. transmission 0.6825 and 0.5643  
 Refinement method Full-matrix least-squares on F<sup>2</sup>  
 Data / restraints / parameters 4289 / 71 / 339  
 Goodness-of-fit on F<sup>2</sup> 1.093



## SUPPORTING INFORMATION

Final R indices [ $I > 2\sigma(I)$ ]  $R_1 = 0.0714$ ,  $wR_2 = 0.1708$

R indices (all data)  $R_1 = 0.0722$ ,  $wR_2 = 0.1719$

Absolute structure parameter  $-0.2(2)$

Extinction coefficient n/a

Largest diff. peak and hole 0.259 and  $-0.274 \text{ e.}\text{\AA}^{-3}$

**S43** (6 mg, ca. 5%)

**$^1\text{H NMR}$  ( $\text{CDCl}_3$ , 125 MHz):**  $\delta$  7.41 (d,  $J = 1.7$  Hz, 1H), 7.36 (dd,  $J = 1.7$  Hz, 1H), 6.34 (d,  $J = 1.7$  Hz, 1H), 6.28 (dd,  $J = 9.9$ , 2.0 Hz, 1H), 6.06 (d,  $J = 9.9$  Hz, 1H), 5.94 (d,  $J = 6.2$  Hz, 1H), 5.93 (s, 1H), 4.96 (s, 1H), 4.60 (dd,  $J = 12.6$ , 2.0 Hz, 1H), 4.46 (d,  $J = 12.6$  Hz, 1H), 4.11 (d,  $J = 6.2$  Hz, 1H), 2.44 (dd,  $J = 12.4$ , 7.5 Hz, 1H), 2.27 – 2.18 (m, 1H), 2.02 – 1.95 (m, 1H), 1.87 – 1.73 (m, 1H), 1.53 – 1.47 (m, 2H), 1.16 (s, 3H), 1.08 (s, 3H), 1.06 (d,  $J = 6.6$  Hz, 3H), 1.04 (d,  $J = 6.6$  Hz, 3H). (29 non-exchangeable protons)

**$^{13}\text{C NMR}$  ( $\text{CDCl}_3$ , 125 MHz):**  $\delta$  174.47, 165.33, 162.44, 150.75, 148.43, 143.11, 141.27, 124.05, 121.71, 119.90, 114.45, 109.95, 82.24, 70.12, 69.06, 45.46, 43.69, 37.88, 33.03, 29.77, 26.85, 25.22, 25.02, 24.28, 18.20, 15.67.

**HRMS(ESI):**  $m/z$  calc. for  $\text{C}_{26}\text{H}_{31}\text{O}_6$   $[\text{M}+\text{H}]^+$ : 439.2115, found: 439.2121.

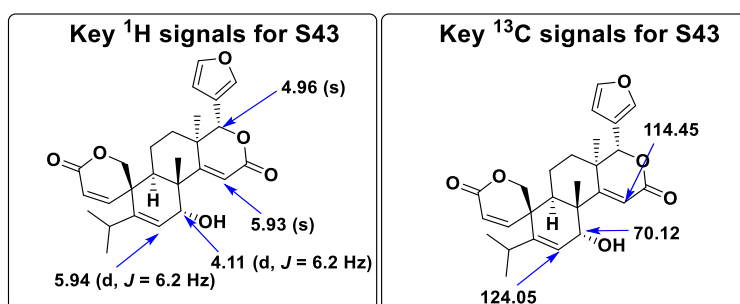

**S44** (15 mg, 12%)

**$^1\text{H NMR}$  ( $\text{CDCl}_3$ , 125 MHz):**  $\delta$  7.50 (dd,  $J = 1.6$ , 0.9 Hz, 1H), 7.44 (dd,  $J = 1.7$ , 1.6 Hz, 1H), 6.71 (s, 1H), 6.43 (dd,  $J = 1.7$ , 0.9 Hz, 1H), 6.27 (dd,  $J = 9.9$ , 1.6 Hz, 1H), 6.21 (d,  $J = 9.9$  Hz, 1H), 5.78 (d,  $J = 2.1$  Hz, 1H), 5.05 (s, 1H), 4.72 (dd,  $J = 12.7$ , 1.6 Hz, 1H), 4.53 (d,  $J = 12.7$  Hz, 1H), 4.05 (d,  $J = 2.1$  Hz, 1H), 2.35 (hept,  $J = 6.8$  Hz, 1H), 1.99 – 1.91 (m, 2H), 1.85 – 1.79 (m, 1H), 1.74 – 1.69 (m, 1H), 1.56 – 1.45 (m, 1H), 1.30 (s, 3H), 1.19 (s, 3H), 1.18 (d,  $J = 6.8$  Hz, 3H), 1.15 (d,  $J = 6.8$  Hz, 3H).

**$^{13}\text{C NMR}$  ( $\text{CDCl}_3$ , 125 MHz):**  $\delta$  171.94, 164.95, 162.20, 150.08, 148.79, 143.13, 141.37, 122.84, 122.38, 119.84, 117.44, 109.98, 81.59, 69.06, 66.11, 44.83, 42.33, 40.07, 37.83, 29.92, 28.37, 25.54, 24.92, 21.41, 18.89, 17.50.

**HRMS(ESI):**  $m/z$  calc. for  $\text{C}_{26}\text{H}_{30}\text{N}_3\text{O}_5$   $[\text{M}+\text{H}]^+$ : 464.2185, found: 464.2178.

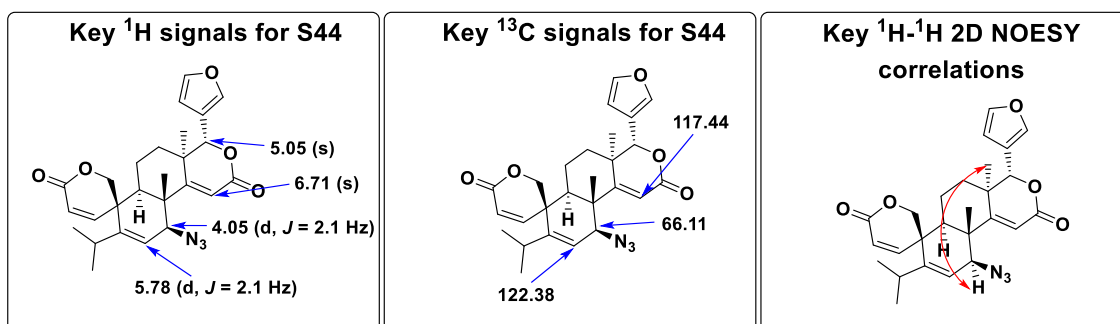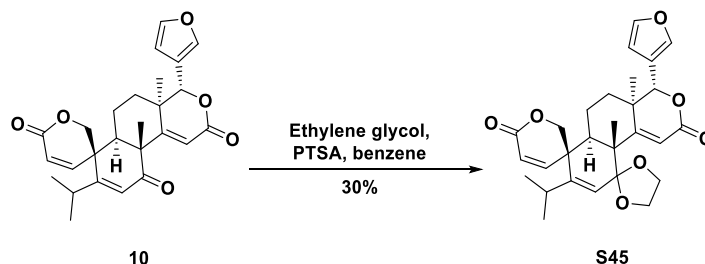

**Procedure:** PTSA (2 mg, 0.02 mmol) and ethylene glycol (34  $\mu\text{L}$ , 0.56 mmol) were added to a solution of **10** (60 mg, 0.14 mmol) in benzene (6 mL) and the resulting solution was refluxed for 72 h with Dean-Stark apparatus. The solvent was evaporated under vacuum

## SUPPORTING INFORMATION

and residue was taken up in dichloromethane and water. The aqueous layer was extracted three times with dichloromethane. The combined organic layers were washed with brine, dried over  $\text{Na}_2\text{SO}_4$ , and concentrated by distillation under reduced pressure to obtain a crude residue that was purified by silica gel flash chromatography (hexane-ethyl acetate 1:1) to provide **S45** (20 mg, 30%) as a white solid.

**$^1\text{H}$  NMR (CDCl<sub>3</sub>, 125 MHz):**  $\delta$  7.47 (d,  $J$  = 1.7 Hz, 1H), 7.41 (dd,  $J$  = 1.7 Hz, 1H), 6.48 (s, 1H), 6.43 (d,  $J$  = 1.7 Hz, 1H), 6.32 (dd,  $J$  = 9.9, 1.6 Hz, 1H), 6.16 (d,  $J$  = 9.9 Hz, 1H), 5.57 (s, 1H), 5.01 (s, 1H), 4.67 (dd,  $J$  = 12.5, 1.6 Hz, 1H), 4.49 (d,  $J$  = 12.5 Hz, 1H), 4.24 (ddd,  $J$  = 8.2, 6.4, 3.6 Hz, 1H), 4.08 (ddd,  $J$  = 8.4, 8.2, 6.7 Hz, 1H), 3.97 (ddd,  $J$  = 7.0, 6.7, 3.6 Hz, 1H), 3.66 (ddd,  $J$  = 8.4, 7.0, 6.4 Hz, 1H), 2.44 (dd,  $J$  = 11.9, 5.4 Hz, 1H), 2.27 (hept,  $J$  = 6.8 Hz, 1H), 1.84 – 1.74 (m, 1H), 1.72 – 1.66 (m, 1H), 1.55 – 1.43 (m, 1H), 1.34 (s, 3H), 1.22 (s, 3H), 1.20 – 1.11 (m, 1H), 1.10 (d,  $J$  = 6.8 Hz, 3H), 1.09 (d,  $J$  = 6.8 Hz, 3H).

**$^{13}\text{C}$  NMR (CDCl<sub>3</sub>, 125 MHz):**  $\delta$  169.95, 165.48, 162.53, 150.74, 146.57, 142.96, 141.37, 125.54, 122.35, 120.26, 118.09, 110.21, 109.42, 81.75, 69.21, 65.18, 65.10, 45.98, 44.71, 39.09, 37.88, 29.66, 29.29, 25.01, 24.86, 21.73, 20.36, 17.38.

**HRMS(ESI):**  $m/z$  calc. for  $\text{C}_{28}\text{H}_{33}\text{O}_7$   $[\text{M}+\text{H}]^+$ : 481.2226, found: 481.2212.

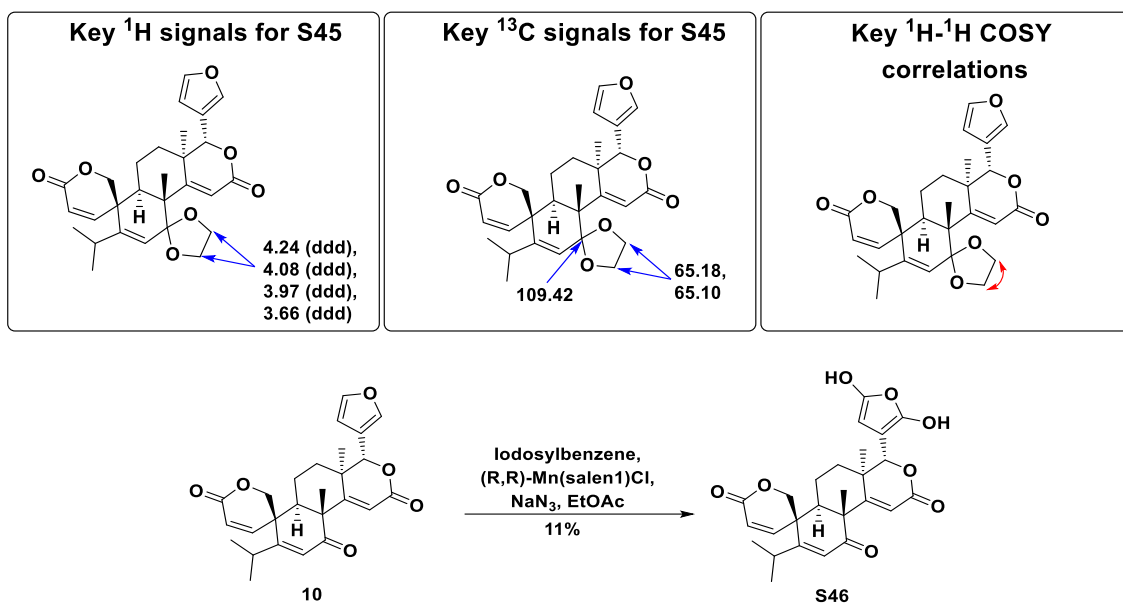

**Procedure:** A dried vial was charged with **10** (50 mg, 0.11mmol), iodosylbenzene (20mg, 0.91mmol), and Mn(salen)Cl (2mg, 0.03mmol). Then, 1.5 M sodium azide aqueous solution (0.2 mL) was added followed by ethyl acetate (1 mL) and the resulting mixture was stirred 30° C. After the consumption of solid iodosylbenzene another portion of catalyst (2mg, 0.03mmol), 1.5 M sodium azide aqueous solution (0.2 mL) and iodosylbenzene (20mg, 0.91mmol) were added sequentially. This step was repeated 4 times before brine was added to the solution. The aqueous layer was extracted 3 times with dichloromethane, dried over  $\text{Na}_2\text{SO}_4$ , the solution was concentrated by distillation at reduced pressure, and the residue was purified by flash chromatography on silica gel (hexane-ethyl acetate 3:7), giving **S46** 90% pure (6 mg, 11%) as a white solid.

**$^1\text{H}$  NMR (DMSO-*d*<sub>6</sub>, 500 MHz):**  $\delta$  7.89 (dd,  $J$  = 20.6, 17.7 Hz, 1H), 7.59 (d,  $J$  = 4.0 Hz, 1H), 6.83 (dd,  $J$  = 10.0, 4.9 Hz, 1H), 6.44 (s, 1H), 6.27 (dd,  $J$  = 10.0, 2.7 Hz, 1H), 6.23 (dd,  $J$  = 20.6, 4.0 Hz, 1H), 6.11 (s, 1H), 4.98 (d,  $J$  = 17.7 Hz, 1H), 4.84 (d,  $J$  = 12.5 Hz, 1H), 4.62 (dd,  $J$  = 12.5, 2.7 Hz, 1H), 2.70 (dt,  $J$  = 12.5, 6.2 Hz, 1H), 2.39 (hept,  $J$  = 6.8 Hz, 1H), 1.96 – 1.85 (m, 1H), 1.79 – 1.69 (m, 1H), 1.67 – 1.59 (m, 1H), 1.46 – 1.39 (m, 1H), 1.43 (s, 3H), 1.13 (s, 3H), 1.12 (d,  $J$  = 6.8 Hz, 3H), 1.08 (d,  $J$  = 6.8 Hz, 3H).

**$^{13}\text{C}$  NMR (DMSO-*d*<sub>6</sub>, 125 MHz):**  $\delta$  197.70, 171.04, 170.07, 169.56, 166.05, 164.35, 162.61, 149.98, 130.51, 124.88, 122.98, 118.22, 98.43, 79.65, 78.88, 70.15, 48.09, 38.15, 38.03, 31.76, 25.51, 24.96, 23.93, 22.56, 20.03, 17.23.

**HRMS(ESI):**  $m/z$  calc. for  $\text{C}_{26}\text{H}_{29}\text{O}_8$   $[\text{M}+\text{H}]^+$ : 469.1862, found: 469.1858.

## SUPPORTING INFORMATION

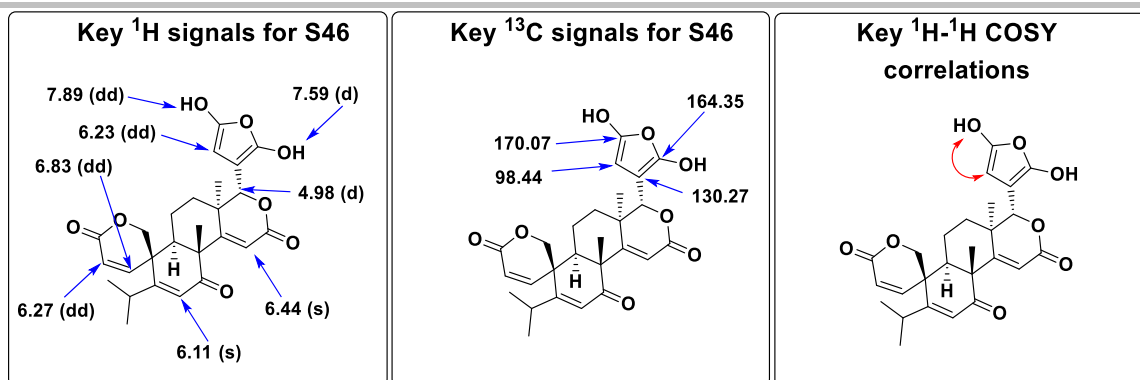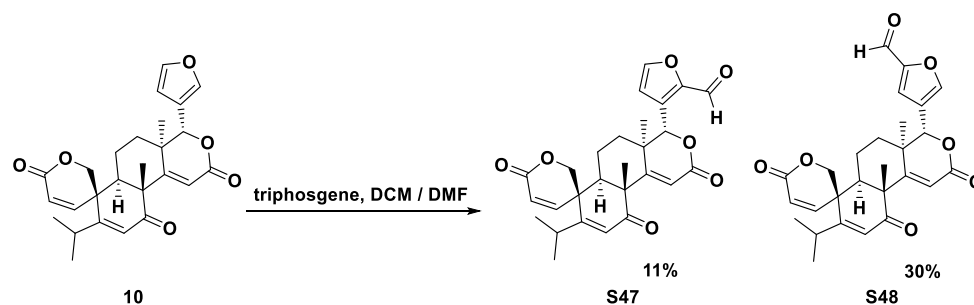

**Procedure:** A solution of triphosgene (88 mg, 0.30 mmol) in DCM (0.4 mL) was added at 0 °C dropwise to a cooled solution of **10** (66 mg, 0.15 mmol) in DCM (1 mL) and DMF (24  $\mu\text{L}$ , 0.30 mmol). The resulting solution was stirred at 40 °C for 12 h. Water was added and the aqueous layer was extracted three times with dichloromethane. The combined organic layers were washed with sodium bicarbonate saturated solution and brine. After drying over  $\text{Na}_2\text{SO}_4$ , the solution was concentrated by distillation at reduced pressure, and the residue was purified by flash chromatography on silica gel (hexane-ethyl acetate 1:1) to obtain **S47** (8 mg, 11%) and **S48** (20 mg, 30%) as white solids.

**S47** (8 mg, 11%)

$^1\text{H NMR}$  ( $\text{CDCl}_3$ , 125 MHz):  $\delta$  9.78 (s, 1H), 7.60 (d,  $J = 2.0$  Hz, 1H), 6.72 (br s, 1H), 6.68 (s, 1H), 6.31 (d,  $J = 10.0$  Hz, 1H), 6.20 (d,  $J = 10.0$  Hz, 1H), 6.09 (s, 1H), 5.77 (s, 1H), 4.72 (d,  $J = 12.4$  Hz, 1H), 4.47 (d,  $J = 12.4$  Hz, 1H), 2.45 – 2.37 (m, 2H), 2.01 – 1.89 (m, 2H), 1.72 (td,  $J = 11.9, 11.0, 5.8$  Hz, 1H), 1.51 (s, 3H), 1.21 – 1.15 (m, 1H), 1.12 (s, 3H), 1.11 (d,  $J = 6.8$  Hz, 3H), 1.08 (d,  $J = 6.8$  Hz, 3H).

$^{13}\text{C NMR}$  ( $\text{CDCl}_3$ , 125 MHz):  $\delta$  196.60, 180.33, 167.31, 164.65, 164.15, 161.72, 149.13, 148.19, 147.17, 128.66, 125.96, 123.63, 119.04, 114.36, 78.87, 69.41, 48.17, 45.62, 40.32, 39.02, 30.98, 26.14, 25.82, 24.32, 24.13, 21.12, 17.34.

**HRMS(ESI):**  $m/z$  calc. for  $\text{C}_{27}\text{H}_{29}\text{O}_7$   $[\text{M}+\text{H}]^+$ : 465.1913, found: 465.1907.

**Opt. Rot.:**  $[\alpha]_{\text{D}}^{25} = +48$  ( $c = 0.04$ , acetone).

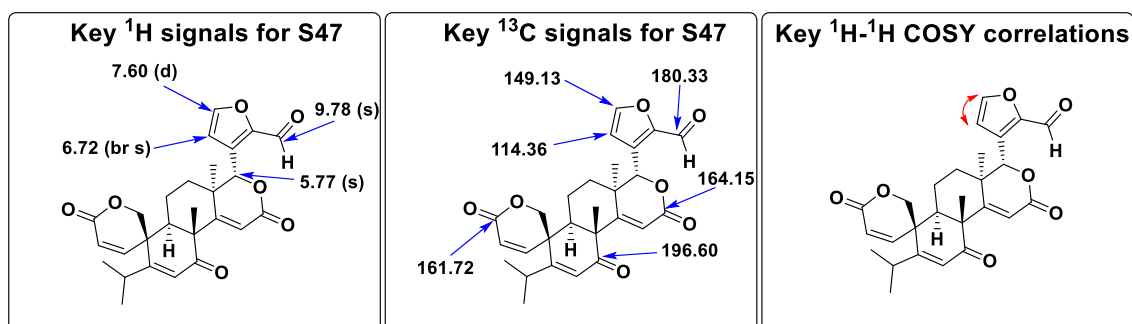

**S48** (20 mg, 30%)

$^1\text{H NMR}$  ( $\text{CDCl}_3$ , 125 MHz):  $\delta$  9.67 (s, 1H), 7.74 (s, 1H), 7.24 (s, 1H), 6.72 (s, 1H), 6.41 (dd,  $J = 9.9, 1.6$  Hz, 1H), 6.31 (d,  $J = 9.9$  Hz, 1H), 6.17 (s, 1H), 5.10 (s, 1H), 4.78 (dd,  $J = 12.4, 1.6$  Hz, 1H), 4.55 (d,  $J = 12.4$  Hz, 1H), 2.55 – 2.41 (m, 2H), 2.11 – 2.02 (m, 1H), 1.95 – 1.84 (m, 1H), 1.80 – 1.68 (m, 1H), 1.55 (s, 3H), 1.53 – 1.47 (m, 1H), 1.18 (d,  $J = 6.7$  Hz, 3H), 1.17 (d,  $J = 6.7$  Hz, 3H), 1.12 (s, 3H).

$^{13}\text{C NMR}$  ( $\text{CDCl}_3$ , 125 MHz):  $\delta$  196.22, 177.93, 167.22, 164.34, 163.90, 161.67, 153.01, 148.09, 146.18, 126.01, 123.80, 123.07, 119.23, 80.96, 77.22, 69.18, 48.13, 45.65, 40.09, 37.77, 31.03, 27.86, 25.50, 24.36, 24.15, 20.94, 17.33.

## SUPPORTING INFORMATION

HRMS(ESI):  $m/z$  calc. for  $C_{27}H_{29}O_7$   $[M+H]^+$ : 465.1913, found: 465.1908.

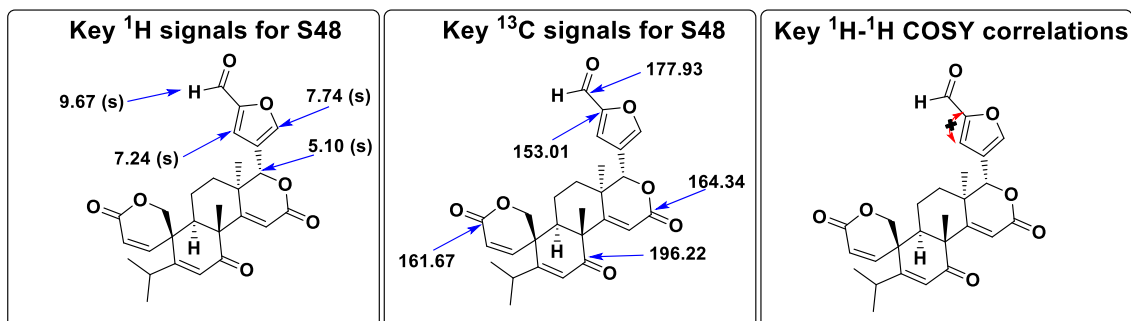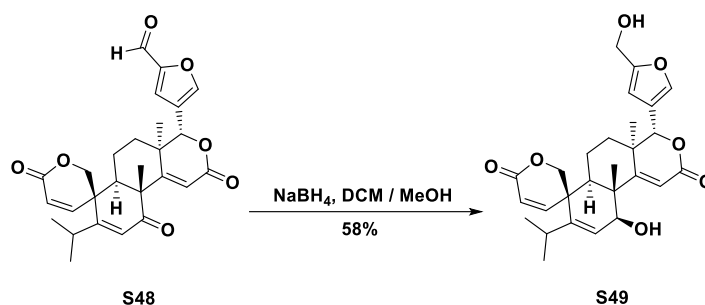

**Procedure:** A solution of  $NaBH_4$  (30 mg, 0.72 mmol) in anhydrous methanol (1.2 mL) was added to a solution of **S48** (60 mg, 0.12 mmol) in dichloromethane (2.4 mL) at  $-20^\circ C$  and the resulting mixture was stirred at  $-78^\circ C$ . After 20 minutes, the reaction was quenched by the addition of a 2 M hydrochloric acid solution and extracted three times with dichloromethane. The organic layers were dried over  $Na_2SO_4$  and concentrated by distillation under reduced pressure to obtain a crude residue that was purified by silica gel flash chromatography (hexane-ethyl acetate 3:7) to provide **S49** (32 mg, 58%) as a white solid.

$^1H$  NMR ( $CDCl_3/CD_3OD$ , 125 MHz):  $\delta$  7.34 (s, 1H), 6.64 (s, 1H), 6.22 (br s, 1H), 6.21 (dd,  $J = 9.8, 1.6$  Hz, 1H), 6.05 (d,  $J = 9.8$  Hz, 1H), 5.55 (d,  $J = 1.9$  Hz, 1H), 4.92 (s, 1H), 4.64 (dd,  $J = 12.6, 1.6$  Hz, 1H), 4.43 (s, 2H), 4.41 (d,  $J = 12.6$  Hz, 1H), 4.06 (d,  $J = 1.9$  Hz, 1H), 2.15 (hept,  $J = 6.8$  Hz, 1H), 1.86 – 1.76 (m, 2H), 1.71 – 1.63 (m, 1H), 1.62 – 1.55 (m, 1H), 1.41 – 1.36 (m, 1H), 1.14 (s, 3H), 1.07 (s, 3H), 1.02 (d,  $J = 6.8$  Hz, 3H), 0.98 (d,  $J = 6.8$  Hz, 3H). (30 non-exchangeable protons)

$^{13}C$  NMR ( $CDCl_3/CD_3OD$ , 125 MHz):  $\delta$  178.55, 170.68, 167.26, 159.01, 155.61, 148.63, 144.91, 132.95, 125.86, 124.38, 120.34, 111.51, 85.70, 77.42, 73.51, 60.60, 48.74, 46.57, 43.38, 41.61, 33.17, 32.39, 28.91, 28.88, 24.92, 21.50, 21.24.

HRMS(ESI):  $m/z$  calc. for  $C_{27}H_{33}O_7$   $[M+H]^+$ : 469.2226, found: 469.2223.

Opt. Rot.:  $[\alpha]_D^{25} = +11$  ( $c = 0.09$ , acetone).

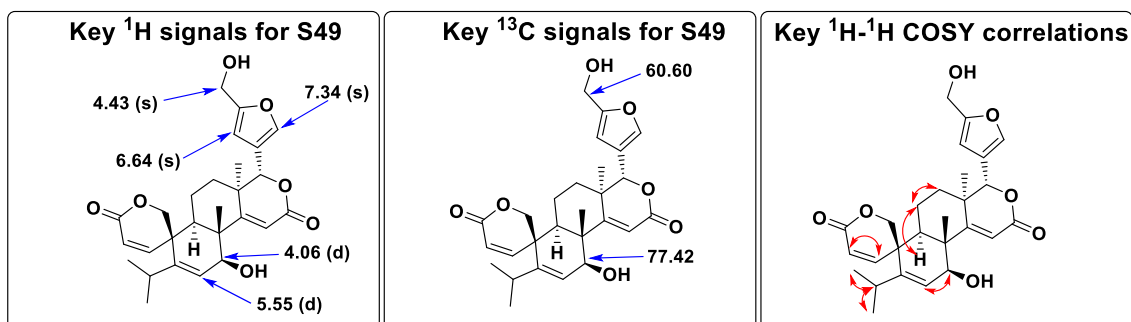

## SUPPORTING INFORMATION

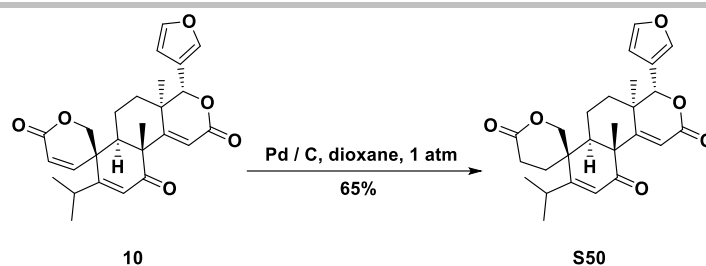

**Procedure:** A suspension of **10** (115 mg, 0.25 mmol) in dioxane (16 mL) was hydrogenated in the presence of 10% Pd/C at 1 atm for 48 h. The catalyst was removed by filtration over celite, and the filtrate was evaporated under reduced pressure to obtain a crude residue that was purified by silica gel flash chromatography (hexane-ethyl acetate dichloromethane 4:5:1) to provide **S50** (71 mg, 65%) as a white solid.

**<sup>1</sup>H NMR (DMSO-*d*<sub>6</sub>, 125 MHz):**  $\delta$  7.77 (d,  $J$  = 1.7 Hz, 1H), 7.70 (dd,  $J$  = 1.7, 1.7 Hz, 1H), 6.57 (d,  $J$  = 1.7 Hz, 1H), 6.27 (s, 1H), 6.00 (s, 1H), 5.20 (s, 1H), 4.63 (d,  $J$  = 12.4 Hz, 1H), 4.47 (d,  $J$  = 12.4 Hz, 1H), 2.73 (ddd,  $J$  = 14.7, 8.1, 6.3 Hz, 1H), 2.62 (ddd,  $J$  = 15.4, 8.1, 6.3 Hz, 1H), 2.57 – 2.52 (m, 1H), 2.36 (dd,  $J$  = 11.9, 3.9 Hz, 1H), 2.11 (ddd,  $J$  = 14.7, 8.1, 6.3 Hz, 1H), 1.95 – 1.87 (m, 2H), 1.83 – 1.73 (m, 2H), 1.38 (s, 3H), 1.36 – 1.22 (m, 1H), 1.18 (d,  $J$  = 6.8 Hz, 3H), 1.13 (d,  $J$  = 6.8 Hz, 3H), 1.00 (s, 3H).

**<sup>13</sup>C NMR (DMSO-*d*<sub>6</sub>, 125 MHz):**  $\delta$  197.73, 174.03, 173.25, 166.31, 164.80, 143.80, 142.23, 122.91, 120.73, 119.36, 110.87, 80.67, 69.18, 49.66, 44.82, 43.19, 37.38, 30.21, 30.18, 30.03, 29.30, 25.00, 24.70, 24.38, 22.00, 17.82.

**HRMS(ESI):**  $m/z$  calc. for C<sub>26</sub>H<sub>31</sub>O<sub>6</sub> [M+H]<sup>+</sup>: 439.2121, found: 439.2117.

**Opt. Rot.:**  $[\alpha]_D^{25}$  = - 87 (c = 0.03, acetone).

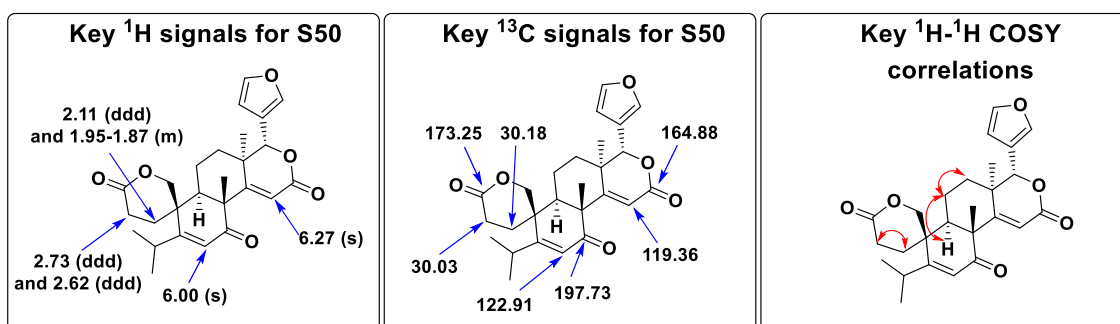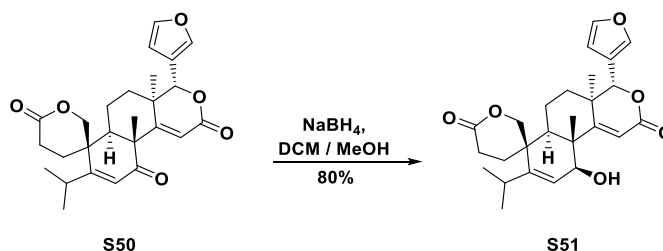

**Procedure:** A solution of NaBH<sub>4</sub> (12 mg, 0.34 mmol) in anhydrous methanol (1 mL) was added to a solution of **S50** (34 mg, 0.08 mmol) in dichloromethane (2 mL) at -40 °C and the resulting mixture was stirred at -20 °C. After 15 minutes, the reaction was quenched with a 2 M hydrochloric acid solution and extracted three times with dichloromethane. The organic layers were dried over Na<sub>2</sub>SO<sub>4</sub> and concentrated by distillation under reduced pressure. The obtained crude residue was purified by silica gel flash chromatography (hexane-ethyl acetate 4:6) to provide an amorphous solid that was further purified by crystallization (chloroform/hexane) to obtain **S51** (34 mg, 80%).

**<sup>1</sup>H NMR (CDCl<sub>3</sub>, 500 MHz):**  $\delta$  7.51 (d,  $J$  = 1.7 Hz, 1H), 7.45 (dd,  $J$  = 1.7, 1.8 Hz, 1H), 6.64 (s, 1H), 6.46 (d,  $J$  = 1.8 Hz, 1H), 5.52 (d,  $J$  = 1.8 Hz, 1H), 5.07 (s, 1H), 4.54 (d,  $J$  = 12.6 Hz, 1H), 4.31 (d,  $J$  = 12.6 Hz, 1H), 4.21 (br s, 1H), 2.72 – 2.58 (m, 2H), 2.40 (hept,  $J$  = 6.7 Hz, 1H), 2.33 – 2.27 (m, 1H), 2.18 – 2.13 (m, 1H), 1.94 – 1.73 (m, 4H), 1.56 – 1.46 (m, 1H), 1.22 (s, 3H), 1.21 (d,  $J$  = 6.7 Hz, 3H), 1.21 (s, 3H), 1.16 (d,  $J$  = 6.7 Hz, 3H). (31 non-exchangeable protons)

**<sup>13</sup>C NMR (CDCl<sub>3</sub>, 125 MHz):**  $\delta$  173.14, 172.62, 165.57, 149.64, 143.06, 141.36, 125.79, 120.07, 117.38, 110.10, 81.46, 74.08, 69.30, 44.88, 44.29, 41.90, 37.56, 31.72, 30.56, 30.28, 28.85, 25.88, 25.40, 22.35, 18.31, 16.88.

**HRMS(ESI):**  $m/z$  calc. for C<sub>26</sub>H<sub>33</sub>O<sub>6</sub> [M+H]<sup>+</sup>: 441.2277, found: 441.2267.

## SUPPORTING INFORMATION

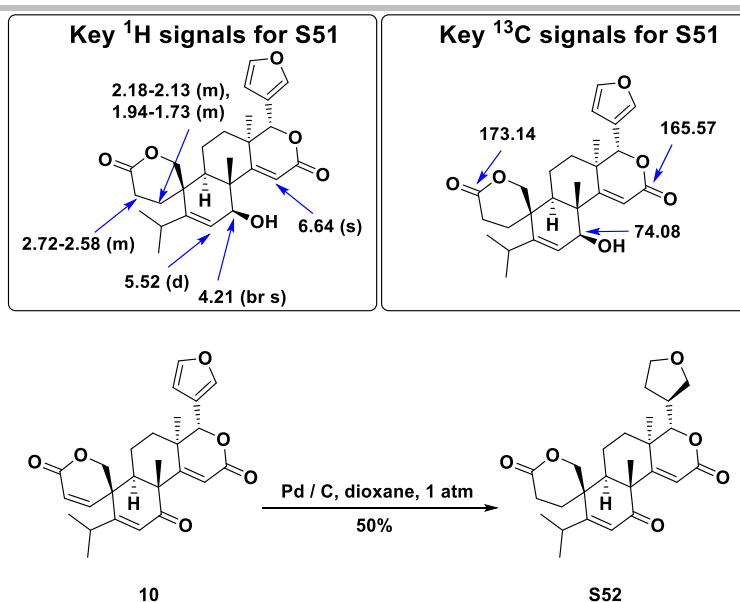

**Procedure:** A suspension of **10** (50 mg, 0.114 mmol) in dioxane (7 mL) was hydrogenated in the presence of 10% Pd/C at 1 atm for 72 h. The catalyst was removed by filtration over celite, and the filtrate was evaporated under reduced pressure to obtain a crude residue that was purified by silica gel flash chromatography (ethyl acetate-methanol 9:1) to provide **S52** (25 mg, 50%) as a white solid.

**Note:** Compound **S50** (mono reduced) was also isolated (17 mg, 34%) as a white solid.

**<sup>1</sup>H NMR (DMSO-*d*<sub>6</sub>, 125 MHz):** δ 6.36 (s, 1H), 6.06 (s, 1H), 4.59 (d, *J* = 12.5 Hz, 1H), 4.38 (d, *J* = 12.5 Hz, 1H), 4.01 – 3.94 (m, 2H), 3.88 – 3.81 (m, 2H), 3.49 (dd, *J* = 9.7, 8.3 Hz, 1H), 2.79 – 2.64 (m, 2H), 2.58 – 2.47 (m, 2H), 2.39 (dd, *J* = 12.9, 3.6 Hz, 1H), 2.33 – 2.27 (m, 1H), 2.18 – 2.06 (m, 2H), 2.05 – 1.98 (m, 1H), 1.96 – 1.82 (m, 2H), 1.69 – 1.59 (m, 2H), 1.40 (s, 3H), 1.26 (d, *J* = 6.8 Hz, 3H), 1.19 (d, *J* = 6.7 Hz, 3H), 1.15 (s, 3H).

**<sup>13</sup>C NMR (DMSO-*d*<sub>6</sub>, 125 MHz):** δ 196.38, 171.71, 171.09, 164.46, 163.72, 123.86, 120.65, 84.86, 70.95, 68.93, 68.37, 49.66, 45.00, 43.10, 38.96, 37.58, 30.76, 30.44, 30.39, 30.10, 28.05, 25.02, 24.50, 24.44, 23.13, 18.48.

**HRMS(ESI):** *m/z* calc. for C<sub>26</sub>H<sub>35</sub>O<sub>6</sub> [M+H]<sup>+</sup>: 443.2434, found: 443.2417.

**mp:** >260° C.

**Opt. Rot.:** [α]<sub>D</sub><sup>25</sup> = -249 (c = 0.09, acetone/chloroform).

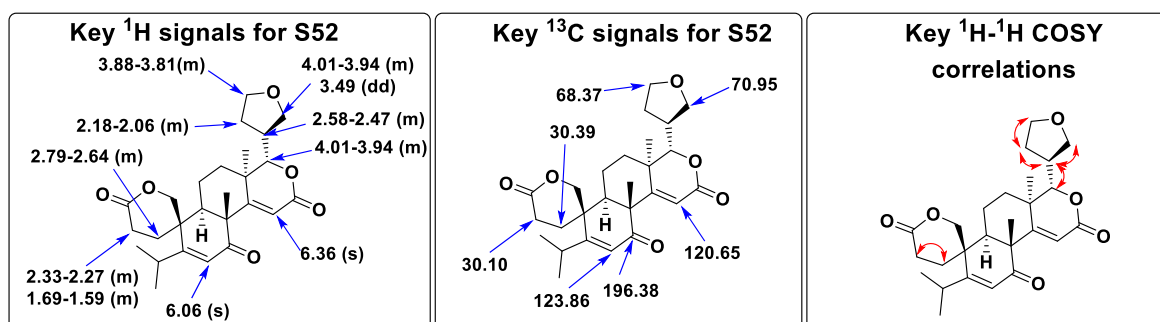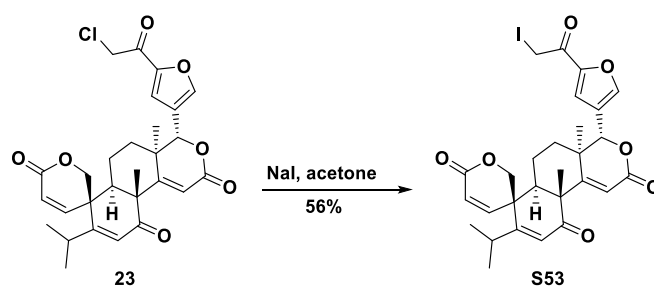

## SUPPORTING INFORMATION

**Procedure:** NaI (12 mg, 0.08 mmol) was added to a solution of **23** (20 mg, 0.04 mmol) in acetone (1 mL), and the resulting solution was stirred in the darkness at 40° C for 90 minutes. The solvent was evaporated, and the residue purified by flash chromatography on silica gel (hexane-ethyl acetate 6:4), giving **S53** (14 mg, 56%) as a white solid.

**Note:** Compound **S53** is not stable in solution.

**<sup>1</sup>H NMR (CDCl<sub>3</sub>, 500 MHz):** δ 7.68 (s, 1H), 7.29 (s, 1H), 6.72 (s, 1H), 6.41 (dd, *J* = 9.9, 1.6 Hz, 1H), 6.31 (d, *J* = 9.9 Hz, 1H), 6.17 (s, 1H), 5.09 (s, 1H), 4.78 (dd, *J* = 12.4, 1.6 Hz, 1H), 4.54 (d, *J* = 12.4 Hz, 1H), 4.23 (dd, *J* = 9.7, 15.7 Hz, 2H), 2.53 – 2.44 (m, 2H), 2.09 – 2.01 (m, 1H), 1.94 – 1.87 (m, 1H), 1.76 – 1.70 (m, 1H), 1.57 – 1.50 (m, 1H), 1.54 (s, 3H), 1.18 (d, *J* = 6.7 Hz, 3H), 1.17 (d, *J* = 6.7 Hz, 3H), 1.13 (s, 3H).

**<sup>13</sup>C NMR (CDCl<sub>3</sub>, 125 MHz):** δ 196.11, 181.95, 167.12, 164.29, 163.80, 161.53, 149.89, 147.97, 145.06, 125.86, 123.65, 123.18, 119.04, 117.82, 80.88, 77.11, 69.09, 47.99, 45.50, 39.97, 37.66, 30.90, 27.69, 25.37, 24.22, 24.01, 20.81, 17.21.

**HRMS(ESI):** *m/z* calc. for C<sub>28</sub>H<sub>30</sub>O<sub>7</sub>I [M+H]<sup>+</sup>: 605.1036, found: 605.1046.

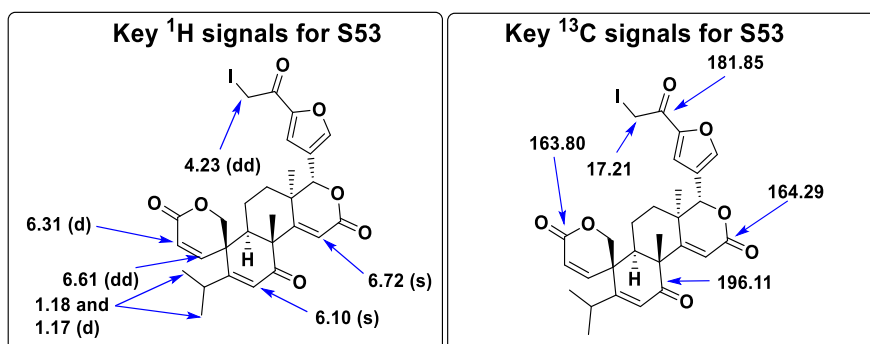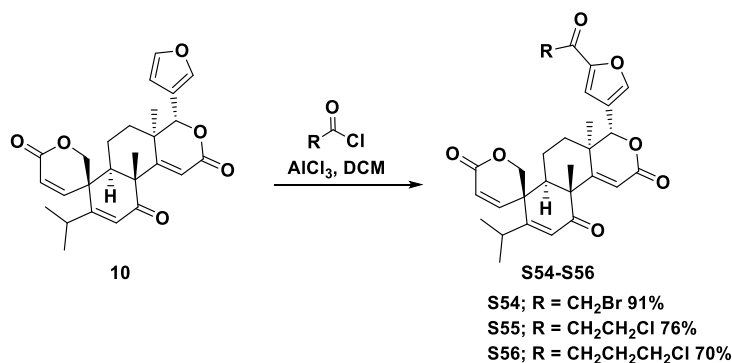

**Procedure:** AlCl<sub>3</sub> (40 mg, 0.30 mmol) was added at 0° C to a cooled solution of **10** (28 mg, 0.065 mmol), in dichloromethane (1.3 mL). The resulting mixture was stirred 30 minutes before the suitable acyl chloride (0.079 mmol) was added to the solution, and the resulting solution was allowed to stir at 30° C for 12 h. Water was added, and the aqueous layer was extracted three times with dichloromethane. The combined organic layers were washed with 2M sodium hydroxide and brine. After drying over Na<sub>2</sub>SO<sub>4</sub>, the solution was concentrated by distillation at reduced pressure, and the residue was purified by flash chromatography on silica gel (hexane-ethyl acetate 6:4), giving **S54-S56** (70-91%) as white solids.

**S54** (33 mg, 91%)

**<sup>1</sup>H NMR (CDCl<sub>3</sub>, 500 MHz):** δ 7.72 (s, 1H), 7.34 (s, 1H), 6.74 (s, 1H), 6.43 (dd, *J* = 9.9, 1.5 Hz, 1H), 6.33 (d, *J* = 9.9 Hz, 1H), 6.19 (s, 1H), 5.12 (s, 1H), 4.80 (dd, *J* = 12.4, 1.5 Hz, 1H), 4.57 (d, *J* = 12.4 Hz, 1H), 4.33 (dd, *J* = 15.3, 11.8 Hz, 2H), 2.54 (dd, *J* = 13.0, 5.7 Hz, 1H), 2.49 (hept, *J* = 6.7 Hz, 1H), 2.13 – 2.02 (m, 1H), 1.95 – 1.88 (m, 1H), 1.76 (ddd, *J* = 14.0, 9.7, 6.5 Hz, 1H), 1.56 (s, 3H), 1.57 – 1.51 (m, 1H), 1.20 (d, *J* = 6.7 Hz, 3H), 1.19 (d, *J* = 6.7 Hz, 3H), 1.14 (s, 3H).

**<sup>13</sup>C NMR (CDCl<sub>3</sub>, 125 MHz):** δ 196.26, 180.40, 167.27, 164.46, 163.93, 161.69, 150.45, 148.12, 145.47, 125.99, 123.77, 123.31, 119.15, 118.19, 80.97, 69.21, 48.12, 45.64, 40.08, 37.79, 31.03, 29.71, 27.80, 25.50, 24.35, 24.14, 20.92, 17.32.

**HRMS(ESI):** *m/z* calc. for C<sub>28</sub>H<sub>30</sub>O<sub>7</sub>Br [M+H]<sup>+</sup>: 557.1175, found: 557.1169.

## SUPPORTING INFORMATION

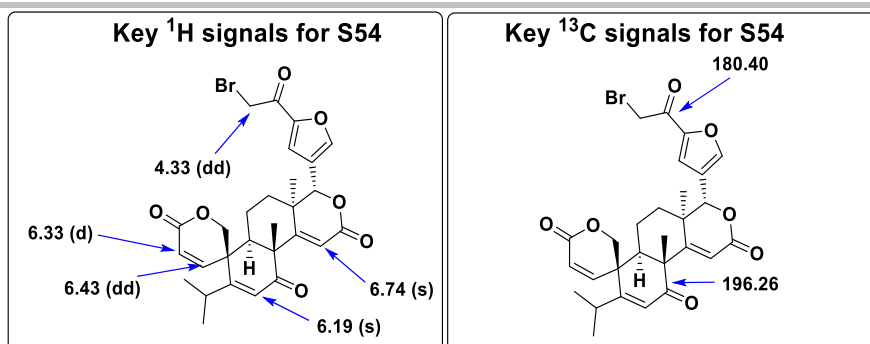

**S55** (26 mg, 76%)

**$^1\text{H}$  NMR (CDCl<sub>3</sub>, 500 MHz):**  $\delta$  7.69 (s, 1H), 7.25 (s, 1H), 6.74 (s, 1H), 6.43 (dd,  $J$  = 9.9, 1.6 Hz, 1H), 6.33 (d,  $J$  = 9.9 Hz, 1H), 6.19 (s, 1H), 5.11 (s, 1H), 4.80 (dd,  $J$  = 12.4, 1.6 Hz, 1H), 4.57 (d,  $J$  = 12.4 Hz, 1H), 3.91 (t,  $J$  = 6.6 Hz, 2H), 3.33 (t,  $J$  = 6.6 Hz, 2H), 2.54 (dd,  $J$  = 13.0, 5.6 Hz, 1H), 2.49 (hept,  $J$  = 6.7 Hz, 1H), 2.14 – 2.02 (m, 1H), 1.97 – 1.84 (m, 1H), 1.95 – 1.87 (m, 1H), 1.56 (s, 3H), 1.55 – 1.50 (m, 1H), 1.20 (d,  $J$  = 6.7 Hz, 3H), 1.19 (d,  $J$  = 6.7 Hz, 3H), 1.14 (s, 3H).

**$^{13}\text{C}$  NMR (CDCl<sub>3</sub>, 125 MHz):**  $\delta$  196.27, 185.65, 167.27, 164.46, 163.99, 161.68, 152.50, 148.12, 144.99, 125.99, 123.77, 122.95, 119.15, 116.75, 81.06, 69.23, 48.12, 45.63, 40.97, 40.11, 38.05, 37.80, 31.03, 27.83, 25.50, 24.35, 24.14, 20.94, 17.34.

**HRMS(ESI):**  $m/z$  calc. for C<sub>29</sub>H<sub>32</sub>O<sub>7</sub>Cl [M+H]<sup>+</sup>: 527.1837, found: 527.1820.

**mp:** decomposes upon heating above 230° C.

**Opt. Rot.:**  $[\alpha]_{\text{D}}^{25}$  = - 110 ( $c$  = 0.10, acetone).

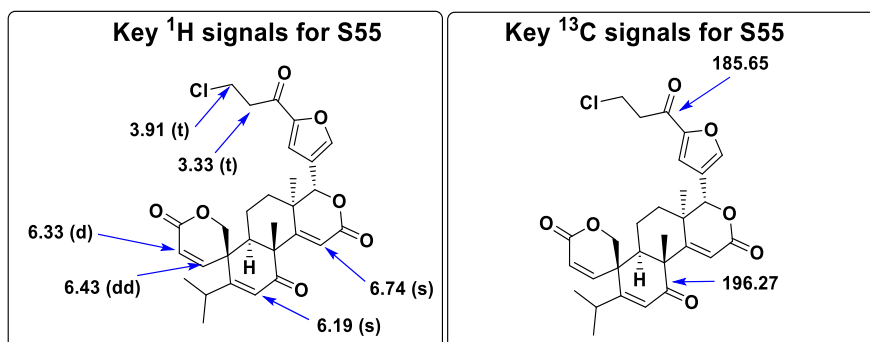

**S56** (26 mg, 70%)

**$^1\text{H}$  NMR (CDCl<sub>3</sub>, 500 MHz):**  $\delta$  7.67 (s, 1H), 7.22 (s, 1H), 6.74 (s, 1H), 6.43 (dd,  $J$  = 9.9, 1.6 Hz, 1H), 6.33 (d,  $J$  = 9.9 Hz, 1H), 6.19 (s, 1H), 5.10 (s, 1H), 4.80 (dd,  $J$  = 12.4, 1.6 Hz, 1H), 4.57 (d,  $J$  = 12.4 Hz, 1H), 3.67 (t,  $J$  = 6.7 Hz, 2H), 3.06 (t,  $J$  = 6.7 Hz, 2H), 2.54 (dd,  $J$  = 13.0, 5.7 Hz, 1H), 2.49 (hept,  $J$  = 6.7 Hz, 1H), 2.22 (p,  $J$  = 6.7 Hz, 2H), 2.10 – 2.02 (m, 1H), 1.97 – 1.86 (m, 1H), 1.77 – 1.71 (m, 1H), 1.56 (s, 3H), 1.55 – 1.51 (m, 1H), 1.20 (d,  $J$  = 6.7 Hz, 3H), 1.19 (d,  $J$  = 6.7 Hz, 3H), 1.14 (s, 3H).

**$^{13}\text{C}$  NMR (CDCl<sub>3</sub>, 125 MHz):**  $\delta$  196.30, 188.15, 167.26, 164.50, 164.07, 161.71, 152.65, 148.14, 144.67, 126.00, 123.76, 122.70, 119.13, 116.26, 81.13, 69.24, 48.11, 45.63, 44.38, 40.11, 37.81, 35.16, 31.03, 27.82, 26.36, 25.51, 24.35, 24.14, 20.93, 17.34.

**HRMS(ESI):**  $m/z$  calc. for C<sub>30</sub>H<sub>34</sub>O<sub>7</sub>Cl [M+H]<sup>+</sup>: 541.1993, found: 541.1980

**Opt. Rot.:**  $[\alpha]_{\text{D}}^{25}$  = - 174 ( $c$  = 0.02, acetone).

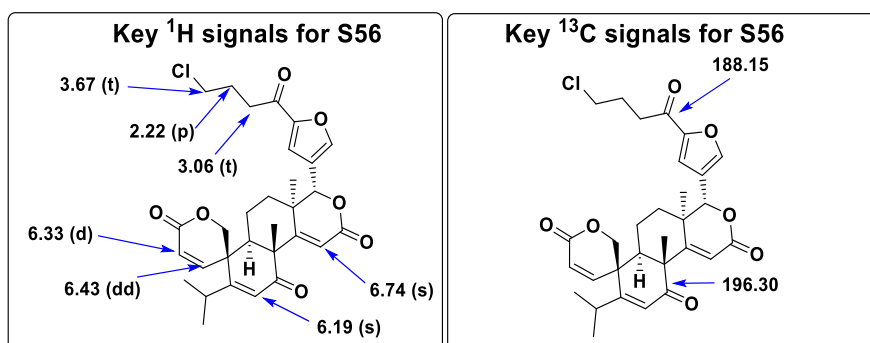



## SUPPORTING INFORMATION

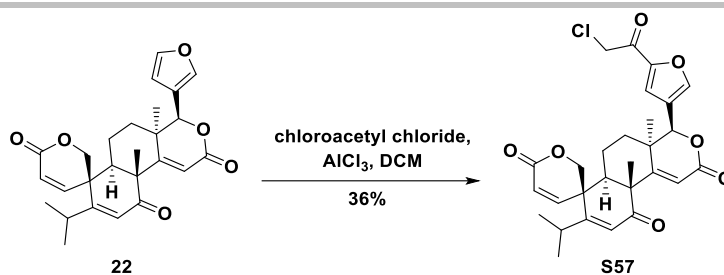

**Procedure:** AlCl<sub>3</sub> (4 mg, 0.03 mmol) was added at 0° C to a cooled solution of **22** (3 mg, 0.006 mmol), in dichloromethane (0.5 mL). The resulting mixture was stirred 30 minutes, before chloroacetyl chloride (1 μL, 0.007 mmol) was added to the solution, and the resulting solution was stirred at 30° C for 12 h. Water was added, and the aqueous layer was extracted three times with dichloromethane. The combined organic layers were washed with 2M sodium hydroxide and brine. After drying over Na<sub>2</sub>SO<sub>4</sub>, the solution was concentrated by distillation at reduced pressure, and the residue was purified by flash chromatography on silica gel (hexane-ethyl acetate 6:4), giving **S57** (2 mg, 36%) as a white solid.

**<sup>1</sup>H NMR (CDCl<sub>3</sub>, 500 MHz):** δ 7.55 (s, *J* = 0.9 Hz, 1H), 7.21 (d, *J* = 0.9 Hz, 1H), 6.74 (s, 1H), 6.42 (dd, *J* = 9.9, 1.4 Hz, 1H), 6.32 (d, *J* = 9.9 Hz, 1H), 6.16 (s, 1H), 5.07 (s, 1H), 4.67 (dd, *J* = 12.4, 1.6 Hz, 1H), 4.53 (s, 1H), 4.52 (s, 1H), 4.49 (d, *J* = 12.4 Hz, 1H), 2.44 (dt, *J* = 10.4, 6.0 Hz, 2H), 1.89 – 1.79 (m, 1H), 1.79 – 1.71 (m, 1H), 1.67 – 1.59 (m, 1H), 1.52 (s, 3H), 1.48 – 1.43 (m, 1H), 1.35 (s, 3H), 1.17 (d, *J* = 6.7 Hz, 3H), 1.16 (d, *J* = 6.7 Hz, 3H).

**<sup>13</sup>C NMR (CDCl<sub>3</sub>, 125 MHz):** δ 196.35, 180.33, 167.64, 162.78, 161.68, 160.87, 150.87, 148.07, 145.33, 125.98, 124.85, 123.89, 119.17, 117.42, 81.03, 69.37, 47.89, 45.59, 44.92, 41.03, 38.14, 31.08, 29.94, 28.24, 24.48, 24.32, 24.11, 18.16.

**HRMS(ESI):** *m/z* calc. for C<sub>28</sub>H<sub>30</sub>O<sub>7</sub>Cl [M+H]<sup>+</sup>: 513.1680, found: 513.1691.

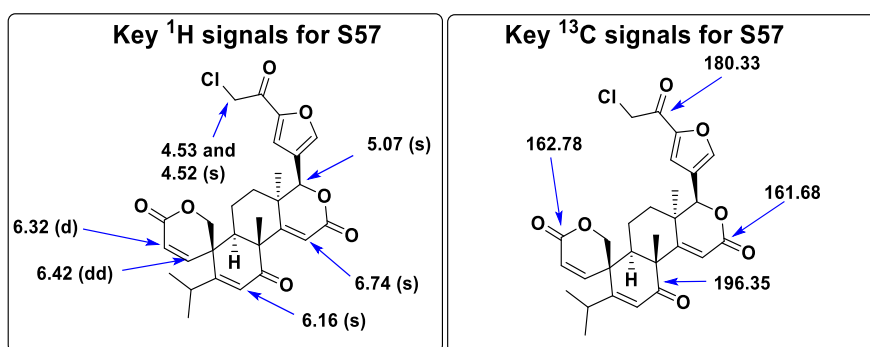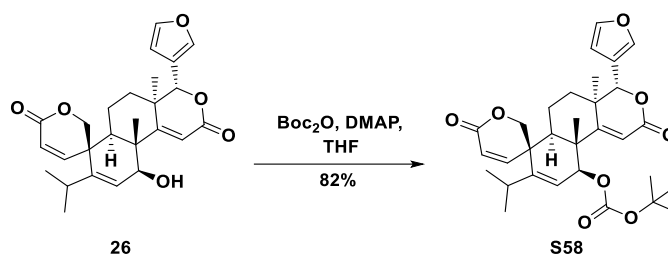

**Procedure:** DMAP (8 mg, 0.06 mmol) was added to a solution of **26** (20 mg, 0.046 mmol) and di-*tert*-butyl dicarbonate (12 mg, 0.05 mmol) in tetrahydrofuran (1 mL), and the resulting solution was stirred at 30° C for 16 h. The solvent was removed under vacuum and the residue purified by silica gel flash chromatography (hexane-ethyl acetate 4:6) to provide **S58** (20 mg, 82%) as a white solid.

**<sup>1</sup>H NMR (CDCl<sub>3</sub>, 500 MHz):** δ 7.41 (s, 1H), 7.35 (d, *J* = 1.7 Hz, 1H), 6.36 (d, *J* = 1.7 Hz, 1H), 6.18 (dd, *J* = 9.9, 1.5 Hz, 1H), 6.15 (s, 1H), 6.11 (d, *J* = 9.9 Hz, 1H), 5.54 (d, *J* = 1.8 Hz, 1H), 5.18 (d, *J* = 1.8 Hz, 1H), 4.96 (s, 1H), 4.63 (dd, *J* = 12.4, 1.5 Hz, 1H), 4.44 (d, *J* = 12.4 Hz, 1H), 2.20 (hept, *J* = 6.8 Hz, 1H), 1.88 (dd, *J* = 11.5, 4.4 Hz, 1H), 1.75 – 1.65 (m, 3H), 1.47 (s, 9H), 1.43 – 1.33 (m, 1H), 1.23 (s, 3H), 1.17 (s, 3H), 1.03 (d, *J* = 6.8 Hz, 3H), 1.01 (d, *J* = 6.8 Hz, 3H).

**<sup>13</sup>C NMR (CDCl<sub>3</sub>, 125 MHz):** δ 170.24, 164.40, 162.45, 153.13, 150.64, 147.13, 143.08, 141.40, 124.92, 122.76, 119.99, 117.93, 110.11, 83.74, 81.22, 77.57, 69.09, 44.72, 41.90, 41.18, 37.74, 30.63, 29.48, 27.80 (3C), 25.02, 25.00, 22.94, 18.30, 17.39.

**HRMS(ESI):** *m/z* calc. for C<sub>31</sub>H<sub>38</sub>O<sub>8</sub> [M+H]<sup>+</sup>: 539.2645, found: 539.2667

## SUPPORTING INFORMATION

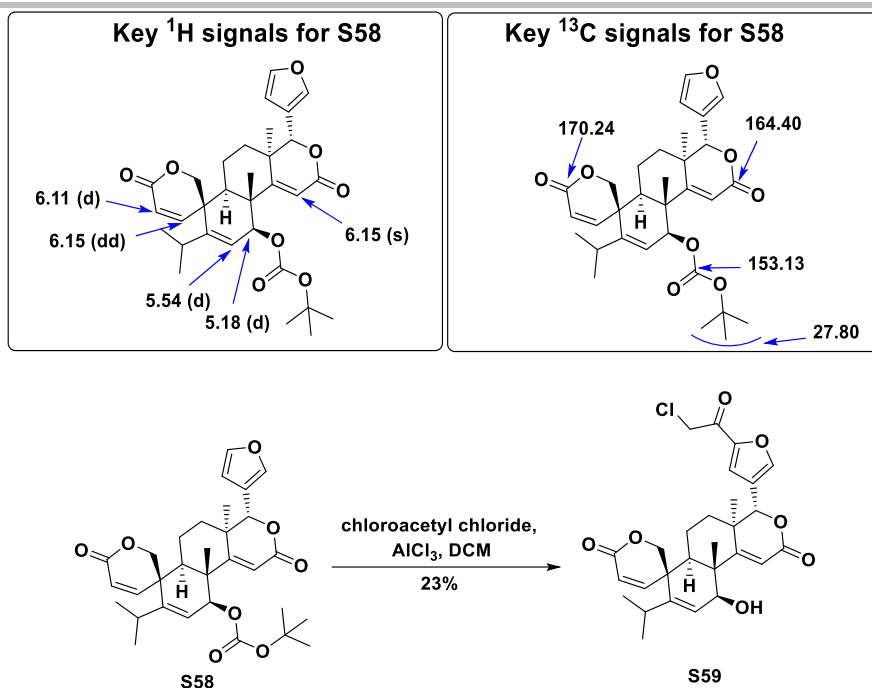

**Procedure:** AlCl<sub>3</sub> (11 mg, 0.08 mmol) was added at 0° C to a cooled solution of **S58** (10 mg, 0.019 mmol), in dichloromethane (0.3 mL). The resulting mixture was stirred 30 minutes, before chloroacetyl chloride (2 μL, 0.022 mmol) was added to the mixture, and the resulting solution was stirred at 30° C for 12 h. Water was added, and the aqueous layer was extracted three times with dichloromethane. The combined organic layers were washed with 2M sodium hydroxide and brine. After drying over Na<sub>2</sub>SO<sub>4</sub>, the solution was concentrated by distillation at reduced pressure, and the residue was purified by flash chromatography on silica gel (hexane-ethyl acetate 6:4), giving **S59** (3 mg, 23%) as a white solid.

**<sup>1</sup>H NMR (CDCl<sub>3</sub>, 500 MHz):** δ 7.61 (s, 1H), 7.27 (s, 1H), 6.72 (s, 1H), 6.18 (dd, *J* = 9.9, 1.7 Hz, 1H), 6.10 (d, *J* = 9.9 Hz, 1H), 5.56 (d, *J* = 1.9 Hz, 1H), 5.01 (s, 1H), 4.63 (dd, *J* = 12.6, 1.7 Hz, 1H), 4.49 (s, 2H), 4.43 (d, *J* = 12.6 Hz, 1H), 4.18 (br s, 1H), 2.20 (hept, *J* = 6.8 Hz, 1H), 1.93 – 1.82 (m, 2H), 1.81 – 1.71 (m, 1H), 1.66 (ddd, *J* = 14.7, 8.7, 6.1 Hz, 1H), 1.45–1.39 (m, 1H), 1.20 (s, 3H), 1.19 – 1.17 (m, 1H), 1.08 (s, 3H), 1.04 (d, *J* = 6.8 Hz, 3H), 1.02 (d, *J* = 6.8 Hz, 3H).

**<sup>13</sup>C NMR (CDCl<sub>3</sub>, 125 MHz):** δ 180.31, 172.88, 164.66, 162.35, 150.66, 150.53, 146.08, 145.34, 128.00, 123.33, 122.60, 117.98, 117.14, 80.77, 74.22, 69.24, 44.97, 44.86, 42.67, 39.30, 37.56, 29.39, 28.46, 25.21, 25.15, 21.10, 17.75, 17.19.

**HRMS(ESI):** *m/z* calc. for C<sub>28</sub>H<sub>32</sub>O<sub>7</sub>Cl [M+H]<sup>+</sup>: 515.1837, found: 515.1854.

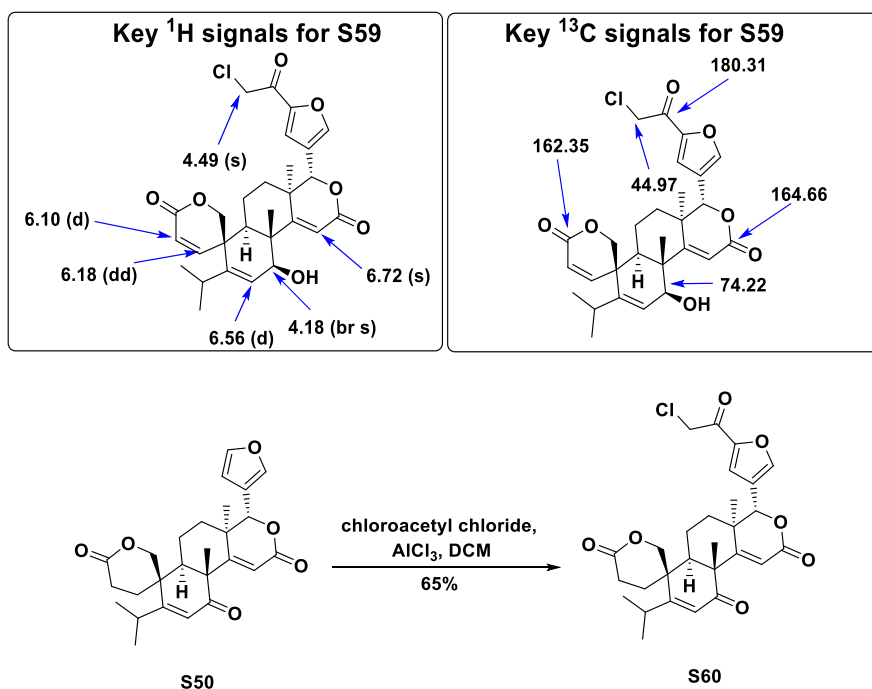

## SUPPORTING INFORMATION

**Procedure:** AlCl<sub>3</sub> (38 mg, 0.28 mmol) was added at 0° C to a cooled solution of **S50** (28 mg, 0.064 mmol), in dichloromethane (1 mL). The resulting mixture was stirred 30 minutes, before chloroacetyl chloride (6 μL, 0.076 mmol) was added to the mixture, and the resulting solution was stirred at 30° C for 12 h. Water was added, and the aqueous layer was extracted three times with dichloromethane. The combined organic layers were washed with 2 M sodium hydroxide and brine. After drying over Na<sub>2</sub>SO<sub>4</sub>, the solution was concentrated by distillation at reduced pressure, and the residue was purified by flash chromatography on silica gel (hexane-ethyl acetate 6:4), giving **S60** (22 mg, 65%) as a white solid.

**<sup>1</sup>H NMR (CDCl<sub>3</sub>, 500 MHz):** δ 7.70 (s, 1H), 7.34 (s, 1H), 6.54 (s, 1H), 6.07 (s, 1H), 5.10 (s, 1H), 4.61 (d, *J* = 12.5 Hz, 1H), 4.56 (s, 2H), 4.38 (d, *J* = 12.5 Hz, 1H), 2.76 – 2.62 (m, 2H), 2.53 (hept, *J* = 6.7 Hz, 1H), 2.40 (dd, *J* = 12.0, 5.1 Hz, 1H), 2.33 – 2.27 (m, 1H), 2.07 – 1.92 (m, 2H), 1.93 – 1.86 (m, 1H), 1.84 – 1.77 (m, 1H), 1.64 – 1.47 (m, 1H), 1.47 (s, 3H), 1.26 (d, *J* = 6.7 Hz, 3H), 1.20 (d, *J* = 6.7 Hz, 3H), 1.09 (s, 3H).

**<sup>13</sup>C NMR (CDCl<sub>3</sub>, 125 MHz):** δ 196.32, 180.34, 171.57, 171.42, 164.20, 163.86, 150.65, 145.46, 123.99, 123.44, 120.10, 117.93, 80.63, 68.98, 49.39, 44.99, 44.82, 43.14, 37.42, 30.52, 30.47, 30.01, 29.46, 25.01, 24.93, 24.46, 21.84, 17.95.

**HRMS(ESI):** *m/z* calc. for C<sub>28</sub>H<sub>32</sub>O<sub>7</sub>Cl [M+H]<sup>+</sup>: 515.1837, found: 515.1840.

**Opt. Rot.:** [α]<sub>D</sub><sup>25</sup> = - 37 (c = 0.08, acetone).

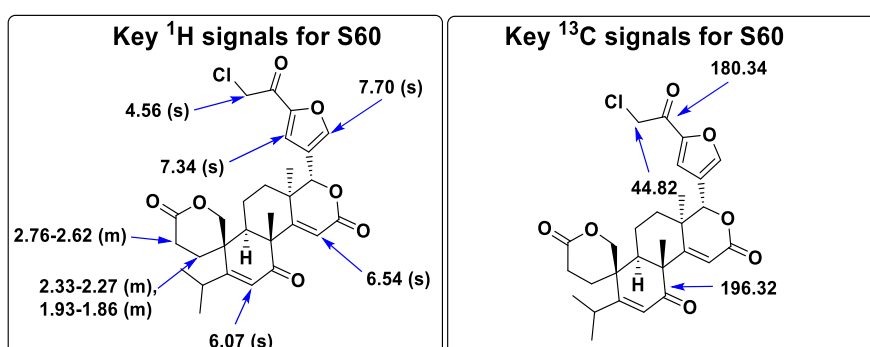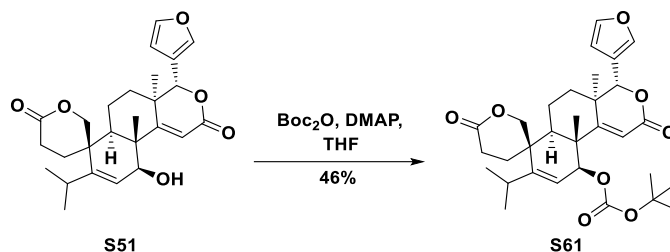

**Procedure:** DMAP (15 mg, 0.12 mmol) was added to a solution of **S51** (42 mg, 0.09 mmol) and di-*tert*-butyl dicarbonate (21 mg, 0.102 mmol) in tetrahydrofuran (1.5 mL), and the resulting solution was stirred at 30° C for 16 h. The solvent was removed under vacuum and the residue purified by silica gel flash chromatography (hexane-ethyl acetate 7:3) to provide **S61** (24 mg, 46%) as a white solid.

**<sup>1</sup>H NMR (CDCl<sub>3</sub>, 500 MHz):** δ 7.51 (d, *J* = 1.8 Hz, 1H), 7.44 (dd, *J* = 1.8, 1.8 Hz, 1H), 6.47 (d, *J* = 1.8 Hz, 1H), 6.21 (s, 1H), 5.46 (d, *J* = 1.8 Hz, 1H), 5.27 (d, *J* = 1.8 Hz, 1H), 5.05 (s, 1H), 4.54 (d, *J* = 12.5 Hz, 1H), 4.33 (d, *J* = 12.5 Hz, 1H), 2.74 – 2.58 (m, 2H), 2.40 (hept, *J* = 6.7 Hz, 1H), 2.23 – 2.13 (m, 1H), 1.92 – 1.83 (m, 3H), 1.82 – 1.65 (m, 2H), 1.55 (s, 9H), 1.50 – 1.42 (m, 1H), 1.28 (s, 3H), 1.21 (d, *J* = 6.7 Hz, 3H), 1.14 (d, *J* = 6.7 Hz, 3H).

**<sup>13</sup>C NMR (CDCl<sub>3</sub>, 125 MHz):** δ 172.53, 170.37, 164.45, 153.22, 150.69, 143.05, 141.41, 122.53, 120.11, 118.13, 110.18, 83.52, 81.06, 77.56, 68.91, 46.36, 43.39, 41.85, 37.60, 32.01, 31.94, 30.50, 29.01, 27.79 (3C), 25.61, 25.29, 23.72, 19.12, 16.85.

**HRMS(ESI):** *m/z* calc. for C<sub>31</sub>H<sub>41</sub>O<sub>8</sub> [M+H]<sup>+</sup>: 541.2801, found: 541.2820.

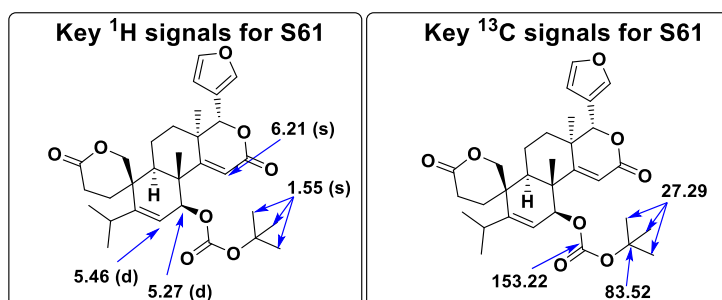

## SUPPORTING INFORMATION

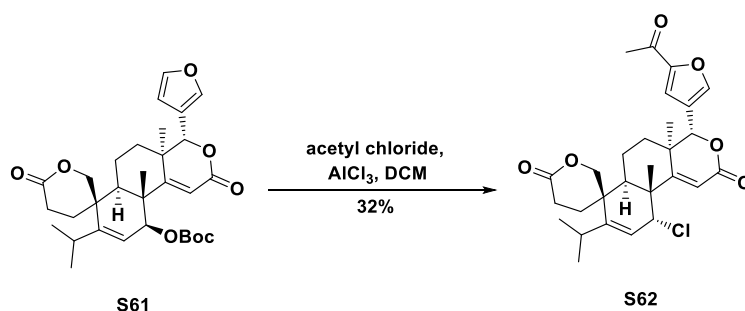

**Procedure:**  $\text{AlCl}_3$  (290 mg, 2.22 mmol) was added at 0° C to a cooled solution of **S61** (260 mg, 0.50 mmol), in dichloromethane (10 mL). The resulting mixture was stirred 30 minutes before acetyl chloride (60  $\mu\text{L}$ , 0.70 mmol) was added to the mixture, and the resulting solution was stirred at 30° C for 12 h. Water was added, and the aqueous layer was extracted three times with dichloromethane. The combined organic layers were washed with brine. After drying over  $\text{Na}_2\text{SO}_4$ , the solution was concentrated by distillation at reduced pressure, and the residue was purified by flash chromatography on silica gel (hexane-ethyl acetate 4:6), giving **S62** (70 mg, 32%) as a white solid.

**$^1\text{H NMR}$  ( $\text{CDCl}_3$ , 500 MHz):**  $\delta$  7.62 (s, 1H), 7.18 (s, 1H), 5.96 (s, 1H), 5.93 (d,  $J = 6.2$  Hz, 1H), 5.02 (s, 1H), 4.57 (d,  $J = 6.2$  Hz, 1H), 4.48 (d,  $J = 12.8$  Hz, 1H), 4.30 (d,  $J = 12.8$  Hz, 1H), 2.68 – 2.55 (m, 3H), 2.50 – 2.43 (m, 1H), 2.49 (s, 3H), 2.28 – 2.19 (m, 1H), 2.03 – 1.91 (m, 1H), 1.87 (ddd,  $J = 14.9, 12.0, 6.0$  Hz, 1H), 1.63 (dd,  $J = 9.2, 2.9$  Hz, 1H), 1.62 – 1.55 (m, 1H), 1.33 (s, 3H), 1.24 (d,  $J = 6.7$  Hz, 3H), 1.17 (s, 3H), 1.12 (d,  $J = 6.7$  Hz, 3H).

**$^{13}\text{C NMR}$  ( $\text{CDCl}_3$ , 125 MHz):**  $\delta$  186.77, 172.00, 171.96, 164.49, 152.92, 151.19, 144.53, 122.71, 122.15, 116.47, 115.54, 81.59, 69.01, 62.51, 44.05, 42.65, 37.49, 37.35, 31.79, 30.40, 29.12, 26.79, 26.05, 25.65, 25.19, 25.14, 18.04, 15.84.

**HRMS(ESI):**  $m/z$  calc. for  $\text{C}_{28}\text{H}_{34}\text{O}_6\text{Cl}$  [ $\text{M}+\text{H}$ ] $^+$ : 501.2044, found: 501.2050

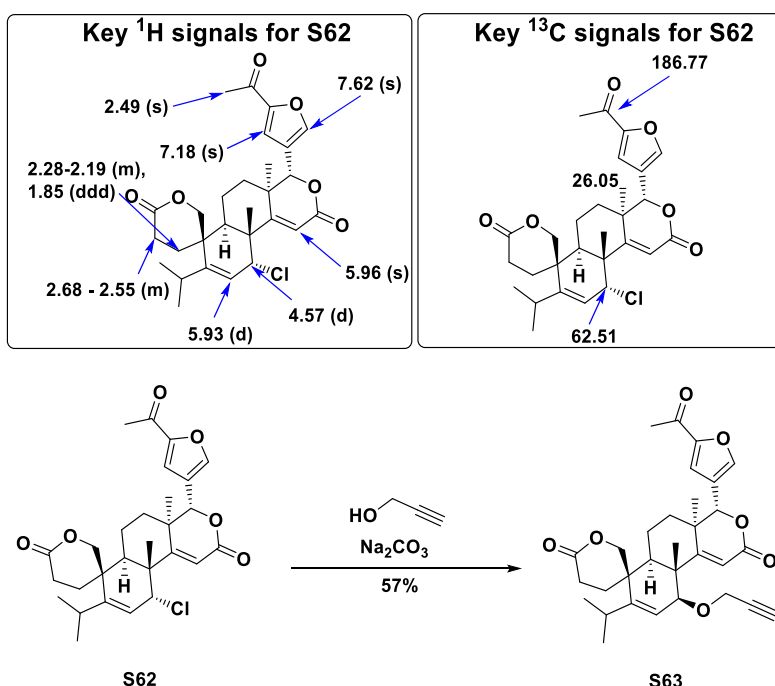

**Procedure:** **S62** (70 mg, 0.14 mmol) was added to a suspension of  $\text{Na}_2\text{CO}_3$  (300 mg, 1.4 mmol) in propargyl alcohol (5 mL) heated at 50° C. The resulting mixture was stirred at 50° C for 16 h. Water was added, and the aqueous layer was extracted three times with dichloromethane. The combined organic layers were washed with brine, dried over  $\text{Na}_2\text{SO}_4$ , the solution was concentrated by distillation at reduced pressure. The obtained residue was purified by preparative thin layer chromatography on silica gel (hexane-ethyl acetate 3:7), giving **S63** (40 mg, 57%) as a white solid.

**$^1\text{H NMR}$  ( $\text{CDCl}_3$ , 500 MHz):**  $\delta$  7.55 (s, 1H), 7.13 (s, 1H), 5.96 (d,  $J = 6.0$  Hz, 1H), 5.92 (s, 1H), 4.95 (s, 1H), 4.39 (d,  $J = 12.6$  Hz, 1H), 4.22 (d,  $J = 12.6$  Hz, 1H), 4.04 (d,  $J = 2.4$  Hz, 2H), 3.83 (d,  $J = 6.0$  Hz, 1H), 2.65 – 2.49 (m, 2H), 2.42 (s, 3H), 2.42 – 2.31 (m, 3H), 2.16 – 2.06 (ddd,  $J = 15.1, 6.5, 4.7$  Hz, 1H), 1.83 – 1.79 (m, 2H), 1.74 (ddd,  $J = 15.1, 11.8, 5.9$  Hz, 1H), 1.61 – 1.55 (m, 1H), 1.51 – 1.47 (m, 1H), 1.16 (d,  $J = 6.7$  Hz, 3H), 1.11 (s, 3H), 1.08 (s, 3H), 1.07 (d,  $J = 6.7$  Hz, 3H).

## SUPPORTING INFORMATION

**<sup>13</sup>C NMR (CDCl<sub>3</sub>, 125 MHz):** δ 186.77, 173.74, 172.38, 164.87, 153.49, 152.82, 144.57, 123.09, 120.19, 116.72, 114.79, 81.28, 79.63, 75.07, 69.15, 56.23, 43.59, 42.35, 38.91, 37.24, 31.67, 30.50, 29.71, 29.35, 28.48, 26.04, 25.79, 25.52, 23.53, 19.58, 16.71.

**HRMS(ESI):** m/z calc. for C<sub>31</sub>H<sub>37</sub>O<sub>7</sub> [M+H]<sup>+</sup>: 521.2539, found: 521.2524

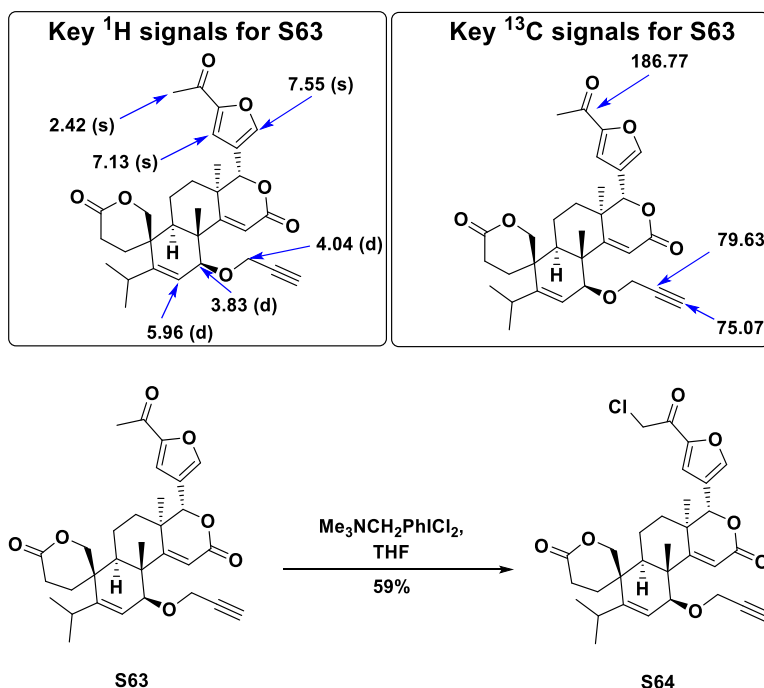

**Procedure:** Benzyltrimethylammonium dichloro iodide (50 mg, 0.15 mmol) was added to a solution of **S63** (40 mg, 0.07 mmol) in THF (5 mL). The resulting mixture was stirred at 40° C for 16 h. Sodium bicarbonate 10% solution was added, and the aqueous layer was extracted three times with dichloromethane. The combined organic layers were washed with sodium thiosulfate saturate solution and brine. After drying over Na<sub>2</sub>SO<sub>4</sub>, the solution was concentrated by distillation at reduced pressure, and the residue was purified by flash chromatography on silica gel (hexane-ethyl acetate 1:1), giving **S64** (25 mg, 59%) as a white solid.

**<sup>1</sup>H NMR (CDCl<sub>3</sub>, 500 MHz):** δ 7.70 (s, 1H), 7.37 (s, 1H), 6.06 (d, *J* = 6.0 Hz, 1H), 6.02 (s, 1H), 5.06 (s, 1H), 4.59 (s, 2H), 4.48 (d, *J* = 12.6 Hz, 1H), 4.32 (d, *J* = 12.6 Hz, 1H), 4.13 (dd, *J* = 2.4, 1.5 Hz, 2H), 3.93 (d, *J* = 6.0 Hz, 1H), 2.73 – 2.58 (m, 2H), 2.51 (t, *J* = 2.4 Hz, 1H), 2.50 – 2.42 (m, 2H), 2.27 – 2.19 (m, 1H), 1.97 – 1.88 (m, 2H), 1.86 – 1.80 (m, 1H), 1.71 – 1.64 (m, 1H), 1.60 – 1.53 (m, 1H), 1.25 (d, *J* = 6.8 Hz, 3H), 1.21 (s, 3H), 1.17 (s, 3H), 1.16 (d, *J* = 6.8 Hz, 3H).

**<sup>13</sup>C NMR (CDCl<sub>3</sub>, 125 MHz):** δ 180.29, 173.67, 172.35, 164.68, 153.52, 150.53, 145.32, 123.70, 120.16, 118.19, 114.81, 81.11, 79.59, 76.84, 75.10, 69.12, 56.20, 45.00, 43.60, 42.36, 38.89, 37.23, 31.67, 30.49, 29.35, 28.49, 25.79, 25.53, 23.52, 19.59, 16.69.

**HRMS(ESI):** m/z calc. for C<sub>31</sub>H<sub>36</sub>O<sub>7</sub>Cl [M+H]<sup>+</sup>: 555.2150, found: 555.2137

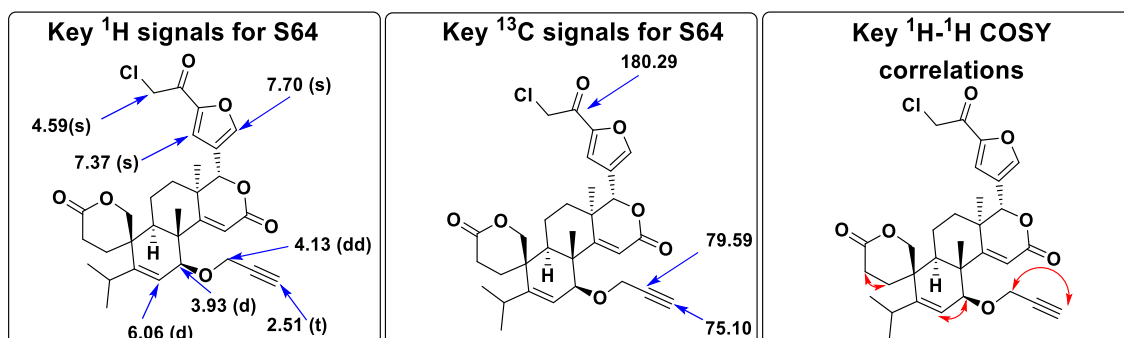

## SUPPORTING INFORMATION

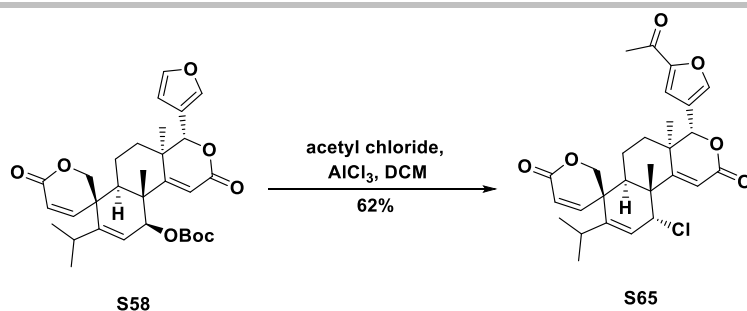

**Procedure:** AlCl<sub>3</sub> (72 mg, 0.54 mmol) was added at 0° C to a cooled solution of **S58** (65 mg, 0.12 mmol), in dichloromethane (1.5 mL). The resulting mixture was stirred 30 minutes, before acetyl chloride (10 μL, 0.144 mmol) was added to the mixture, and the resulting solution was stirred at 30° C for 12 h. Water was added, and the aqueous layer was extracted three times with dichloromethane. The combined organic layers were washed with brine. After drying over Na<sub>2</sub>SO<sub>4</sub>, the solution was concentrated by distillation at reduced pressure, and the residue was purified by flash chromatography on silica gel (hexane-ethyl acetate 1:1), giving **S65** (37 mg, 62%) as a white solid.

**<sup>1</sup>H NMR (CDCl<sub>3</sub>, 500 MHz):** δ 7.64 (s, 1H), 7.19 (s, 1H), 6.39 (dd, *J* = 9.9, 1.9 Hz, 1H), 6.18 (d, *J* = 9.9 Hz, 1H), 6.10 (d, *J* = 6.2 Hz, 1H), 6.00 (s, 1H), 5.06 (s, 1H), 4.69 (dd, *J* = 12.7, 1.9 Hz, 1H), 4.64 (d, *J* = 6.2 Hz, 1H), 4.55 (d, *J* = 12.7 Hz, 1H), 2.65 (dd, *J* = 12.0, 8.0 Hz, 1H), 2.50 (s, 3H), 2.33 (hept, *J* = 6.8 Hz, 1H), 2.21 – 2.08 (m, 1H), 2.01 – 1.89 (m, 1H), 1.64, 1.60 (m, 2H), 1.41 (s, 3H), 1.18 (s, 3H), 1.15 (d, *J* = 6.8 Hz, 3H), 1.13 (d, *J* = 6.8 Hz, 3H).

**<sup>13</sup>C NMR (CDCl<sub>3</sub>, 125 MHz):** δ 186.76, 171.25, 164.33, 161.97, 152.95, 149.56, 147.21, 144.52, 124.39, 122.61, 121.87, 116.36, 115.73, 81.58, 68.81, 61.86, 45.39, 43.37, 37.57, 33.21, 29.81, 26.37, 26.05, 25.46, 24.95, 24.66, 17.67, 15.39.

**HRMS(ESI):** *m/z* calc. for C<sub>28</sub>H<sub>32</sub>O<sub>6</sub>Cl [M+H]<sup>+</sup>: 499.1887, found: 499.1869.

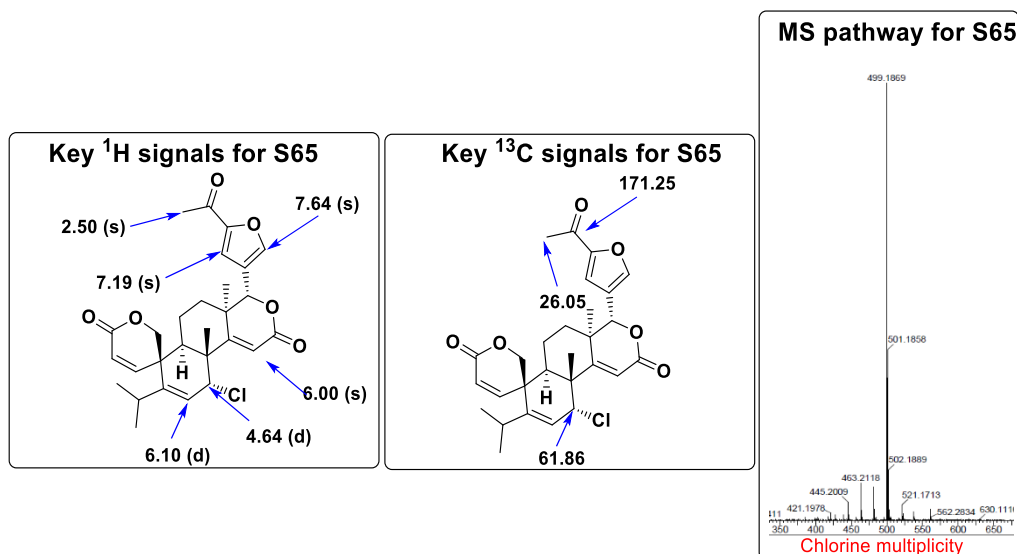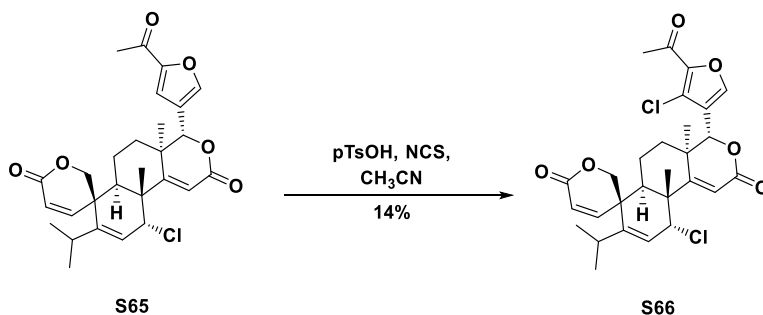

**Procedure:** *p*-toluenesulfonic acid (80 mg, 0.40 mmol) and *N*-chlorosuccinimide (40 mg, 0.30 mmol) were added to a solution of **S65** (140 mg, 0.30 mmol) in acetonitrile (5 mL). The resulting mixture was stirred at reflux for 12 h. Water was added, and the aqueous layer was extracted three times with dichloromethane. The combined organic layers were washed with brine. After drying over Na<sub>2</sub>SO<sub>4</sub>,

## SUPPORTING INFORMATION

the solution was concentrated by distillation at reduced pressure, and the residue was purified by preparative thin layer chromatography on silica gel (hexane-ethyl acetate 4:6), giving **S66** (20 mg, 14%) as a white solid.

**<sup>1</sup>H NMR (CDCl<sub>3</sub>, 500 MHz):** δ 7.32 (s, 1H), 6.39 (dd, *J* = 9.9, 1.9 Hz, 1H), 6.18 (d, *J* = 9.9 Hz, 1H), 6.09 (d, *J* = 6.2 Hz, 1H), 6.01 (s, 1H), 5.03 (s, 1H), 4.70 (dd, *J* = 12.8, 1.9 Hz, 1H), 4.64 (d, *J* = 6.2 Hz, 1H), 4.56 (d, *J* = 12.8 Hz, 1H), 2.66 (dd, *J* = 11.9, 8.3 Hz, 1H), 2.49 (s, 3H), 2.34 (hept, *J* = 6.6 Hz, 1H), 2.24 – 2.12 (m, 1H), 1.98 – 1.88 (m, 1H), 1.70 – 1.62 (m, 1H), 1.52 – 1.44 (m, 1H), 1.43 (s, 3H), 1.27 (s, 3H), 1.15 (d, *J* = 6.6 Hz, 3H), 1.13 (d, *J* = 6.6 Hz, 3H).

**<sup>13</sup>C NMR (CDCl<sub>3</sub>, 125 MHz):** δ 185.35, 170.91, 164.06, 161.96, 151.48, 149.56, 147.33, 139.73, 124.33, 121.88, 118.62, 117.95, 115.74, 79.99, 68.85, 61.84, 45.45, 43.45, 38.86, 33.15, 29.82, 26.22, 25.79, 25.69, 24.96, 24.66, 17.77, 15.36.

**HRMS(ESI):** *m/z* calc. for C<sub>28</sub>H<sub>31</sub>O<sub>6</sub>Cl<sub>2</sub> [M+H]<sup>+</sup>: 533.1498, found: 533.1483.

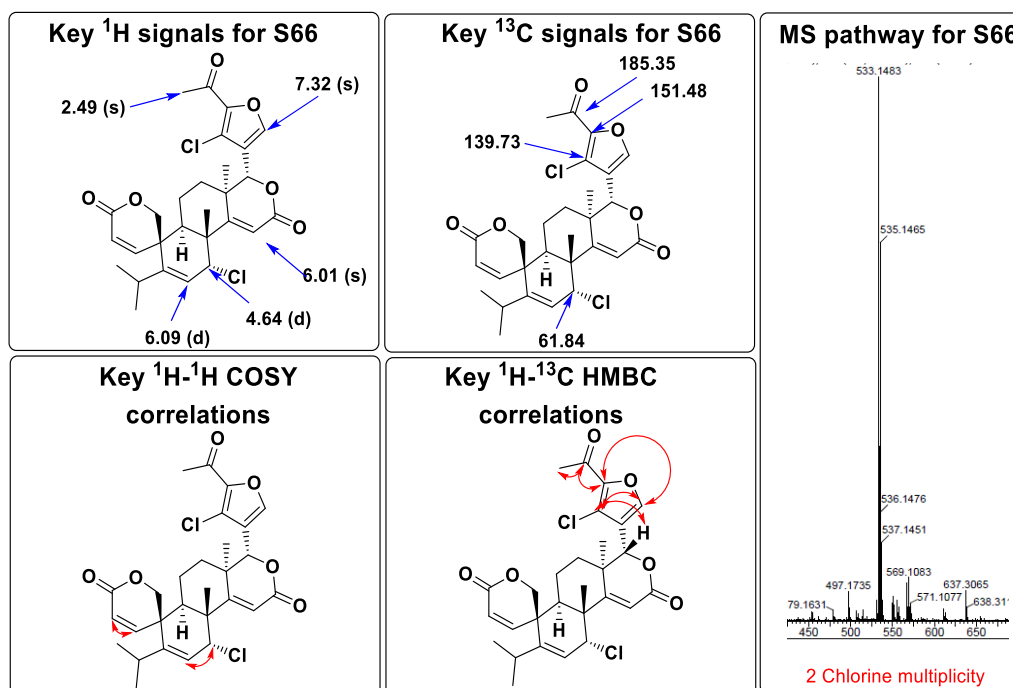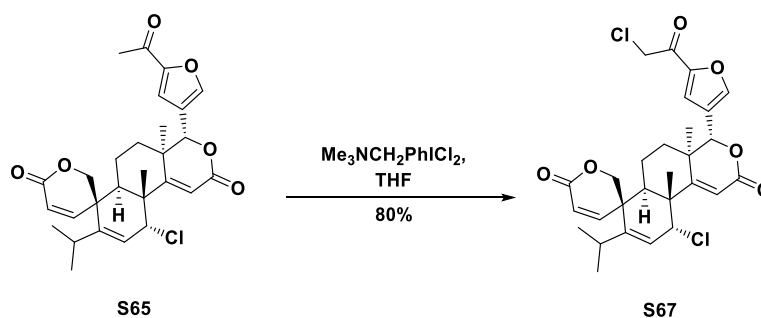

**Procedure:** Benzyltrimethylammonium dichloro iodide (50 mg, 0.15 mmol) was added to a solution of **S65** (35 mg, 0.07 mmol) in THF (2.5 mL). The resulting mixture was stirred at 30° C for 12 h. 10% sodium bicarbonate solution was added, and the aqueous layer was extracted three times with dichloromethane. The combined organic layers were washed with sodium thiosulfate saturate solution and brine. After drying over Na<sub>2</sub>SO<sub>4</sub>, the solution was concentrated by distillation at reduced pressure, and the residue was purified by flash chromatography on silica gel (hexane-ethyl acetate 1:1), giving **S67** (30 mg, 80%) as a white solid.

**<sup>1</sup>H NMR (CDCl<sub>3</sub>, 500 MHz):** δ 7.70 (s, 1H), 7.34 (s, 1H), 6.39 (dd, *J* = 9.9, 2.0 Hz, 1H), 6.18 (d, *J* = 9.9 Hz, 1H), 6.10 (d, *J* = 6.2 Hz, 1H), 6.00 (s, 1H), 5.07 (s, 1H), 4.69 (dd, *J* = 12.8, 2.0 Hz, 1H), 4.64 (d, *J* = 6.2 Hz, 1H), 4.58 (s, 2H), 4.55 (d, *J* = 12.8 Hz, 1H), 2.65 (dd, *J* = 12.1, 1.9 Hz, 1H), 2.33 (hept, *J* = 6.8 Hz, 1H), 2.21 – 2.13 (m, 1H), 1.99 – 1.91 (m, 1H), 1.65 – 1.59 (m, 2H), 1.41 (s, 3H), 1.18 (s, 3H), 1.14 (d, *J* = 6.8 Hz, 3H), 1.12 (d, *J* = 6.8 Hz, 3H).

**<sup>13</sup>C NMR (CDCl<sub>3</sub>, 125 MHz):** δ 180.30, 171.20, 164.15, 161.96, 150.64, 149.54, 147.23, 145.28, 124.37, 123.20, 121.90, 117.91, 115.76, 81.41, 68.80, 61.85, 45.38, 44.98, 43.39, 37.57, 33.20, 29.82, 26.38, 25.46, 24.96, 24.66, 17.69, 15.37.

**HRMS(ESI):** *m/z* calc. for C<sub>28</sub>H<sub>31</sub>O<sub>6</sub>Cl<sub>2</sub> [M+H]<sup>+</sup>: 533.1498, found: 533.1490.

## SUPPORTING INFORMATION

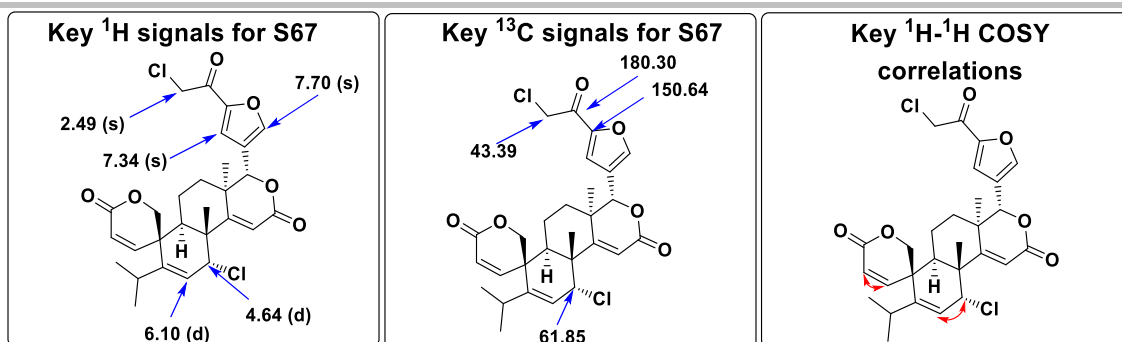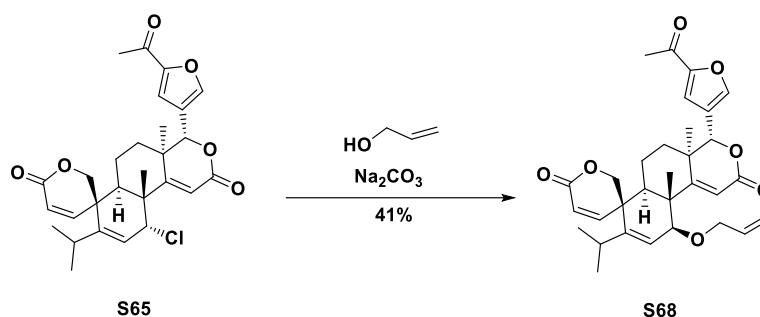

**Procedure:** S65 (80 mg, 0.16 mmol) was added to a suspension of  $\text{Na}_2\text{CO}_3$  (350 mg, 1.6 mmol) in allylic alcohol (6 mL) heated at  $50^\circ\text{C}$ . The resulting mixture was stirred at  $85^\circ\text{C}$  for 48 h. Water was added, and the aqueous layer was extracted three times with dichloromethane. The combined organic layers were washed with brine, dried over  $\text{Na}_2\text{SO}_4$ , the solution was concentrated by distillation at reduced pressure, and the residue was purified by flash chromatography on silica gel (hexane-ethyl acetate 3:1), giving S68 (34 mg, 41%) as a white solid.

**$^1\text{H}$  NMR ( $\text{CDCl}_3$ , 500 MHz):**  $\delta$  7.62 (s, 1H), 7.18 (s, 1H), 6.35 (dd,  $J = 9.9, 1.8$  Hz, 1H), 6.13 (d,  $J = 9.9$  Hz, 1H), 6.12 (d,  $J = 5.8$  Hz, 1H), 5.94 (s, 1H), 5.79 (dddd,  $J = 17.2, 10.3, 5.9, 5.7$  Hz, 1H), 5.21 (ddd,  $J = 17.2, 1.6, 1.5$  Hz, 1H), 5.16 (ddd,  $J = 10.3, 1.6, 1.4$  Hz, 1H), 5.02 (s, 1H), 4.63 (dd,  $J = 12.6, 1.8$  Hz, 1H), 4.51 (d,  $J = 12.6$  Hz, 1H), 4.03 (ddt,  $J = 12.5, 5.7, 1.4$  Hz, 1H), 3.94 (ddt,  $J = 12.5, 5.9, 1.5, 1.5$  Hz, 1H), 3.74 (d,  $J = 5.8$  Hz, 1H), 2.54 (dd,  $J = 12.8, 6.8$  Hz, 1H), 2.48 (s, 3H), 2.32 (hept,  $J = 6.8$  Hz, 1H), 2.04 – 1.91 (m, 1H), 1.89 – 1.77 (m, 1H), 1.66 – 1.48 (m, 2H), 1.20 (s, 3H), 1.13 (s, 3H), 1.12 (d,  $J = 6.8$  Hz, 3H), 1.10 (d,  $J = 6.8$  Hz, 3H).

**$^{13}\text{C}$  NMR ( $\text{CDCl}_3$ , 125 MHz):**  $\delta$  186.74, 173.58, 164.91, 162.44, 152.85, 150.67, 148.54, 144.53, 134.79, 123.40, 122.94, 121.67, 117.38, 116.61, 114.28, 81.42, 77.22, 70.73, 69.05, 53.44, 42.95, 37.61, 34.06, 29.89, 27.53, 26.03, 25.22, 25.14, 23.88, 18.65, 15.87.

**HRMS(ESI):**  $m/z$  calc. for  $\text{C}_{31}\text{H}_{37}\text{O}_7$   $[\text{M}+\text{H}]^+$ : 521.2539, found: 521.2551.

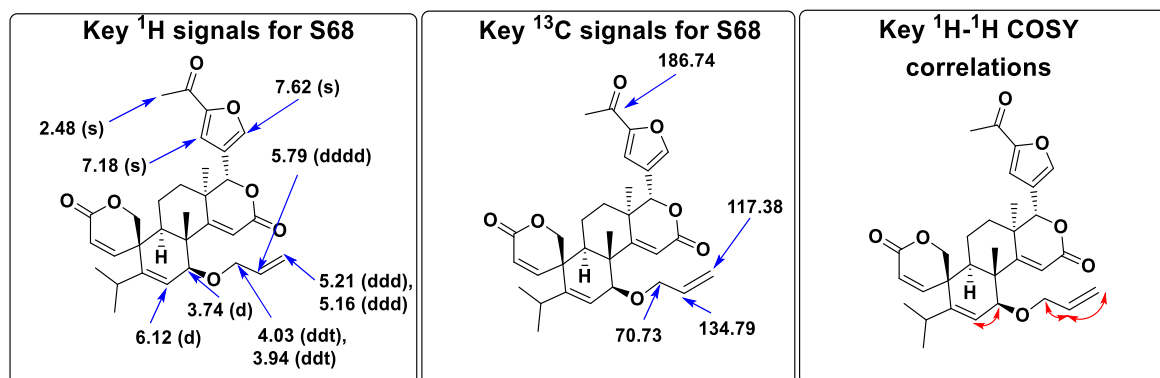



## SUPPORTING INFORMATION

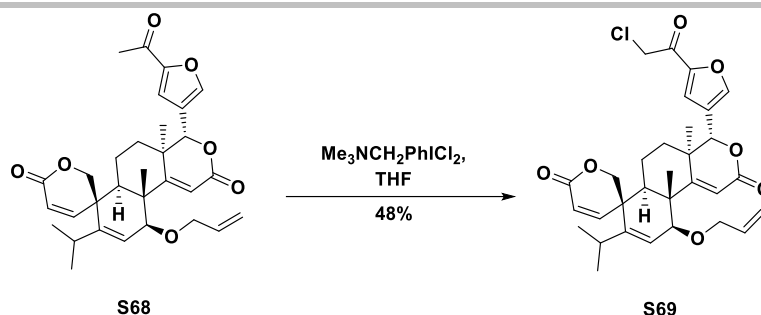

**Procedure:** Benzyltrimethylammonium dichloro iodide (50 mg, 0.12 mmol) was added to a solution of **S68** (30 mg, 0.06 mmol) in THF (3 mL). The resulting mixture was stirred at 40° C for 16 h. Sodium bicarbonate 10% solution was added, and the aqueous layer was extracted three times with dichloromethane. The combined organic layers were washed with sodium thiosulfate saturate solution and brine. After drying over Na<sub>2</sub>SO<sub>4</sub>, the solution was concentrated by distillation at reduced pressure, and the residue was purified by flash chromatography on silica gel (hexane-ethyl acetate 6:4), giving **S69** (16 mg, 48%) as a white solid.

**<sup>1</sup>H NMR (CDCl<sub>3</sub>, 500 MHz):** δ 7.69 (s, 1H), 7.36 (s, 1H), 6.37 (dd, *J* = 9.9, 1.8 Hz, 1H), 6.15 (d, *J* = 9.9 Hz, 1H), 6.14 (d, *J* = 5.8 Hz, 1H), 5.97 (s, 1H), 5.82 (dddd, *J* = 17.2, 10.4, 5.7 Hz, 1H), 5.23 (ddd, *J* = 17.2, 1.6, 1.4 Hz, 1H), 5.19 (ddd, *J* = 10.4, 1.6, 1.4 Hz, 1H), 5.06 (s, 1H), 4.66 (dd, *J* = 12.6, 1.8 Hz, 1H), 4.58 (s, 2H), 4.54 (d, *J* = 12.6 Hz, 1H), 4.06 (ddt, *J* = 12.5, 5.7, 1.4 Hz, 1H), 3.96 (ddt, *J* = 12.5, 5.7, 1.4 Hz, 1H), 3.77 (d, *J* = 5.8 Hz, 1H), 2.57 (dd, *J* = 12.8, 6.8 Hz, 1H), 2.34 (hept, *J* = 6.7 Hz, 1H), 2.10 – 1.94 (m, 1H), 1.89 – 1.81 (m, 1H), 1.70 – 1.58 (m, 2H), 1.23 (s, 3H), 1.15 (s, 3H), 1.14 (d, *J* = 6.7 Hz, 3H), 1.13 (d, *J* = 6.7 Hz, 3H).

**<sup>13</sup>C NMR (CDCl<sub>3</sub>, 125 MHz):** δ 180.27, 173.52, 164.72, 162.42, 150.63, 150.56, 148.57, 145.27, 134.76, 123.54, 123.38, 121.70, 118.09, 117.42, 114.30, 81.23, 77.22, 70.72, 69.03, 45.25, 44.98, 42.97, 37.60, 34.04, 29.90, 27.54, 25.22, 25.14, 23.87, 18.67, 15.85.

**HRMS(ESI):** *m/z* calc. for C<sub>31</sub>H<sub>36</sub>O<sub>7</sub>Cl [M+H]<sup>+</sup>: 555.2150, found: 555.2156

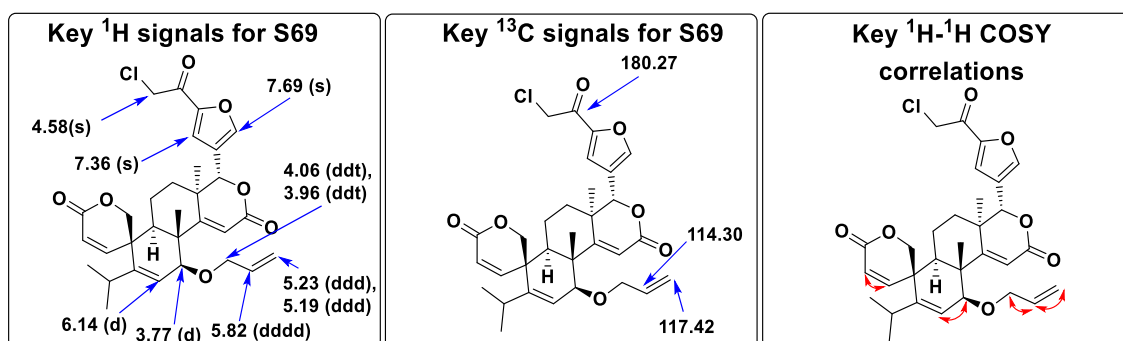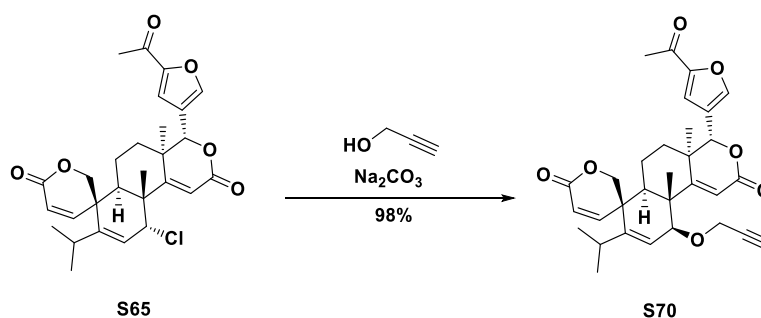

**Procedure:** **S65** (67 mg, 0.13 mmol) was added to a suspension of Na<sub>2</sub>CO<sub>3</sub> (136 mg, 1.30 mmol) in propargyl alcohol (2.3 mL) heated at 50° C. The resulting mixture was stirred at 50° C for 16 h. Water was added, and the aqueous layer was extracted three times with dichloromethane. The combined organic layers were washed with brine and dried over Na<sub>2</sub>SO<sub>4</sub>. The solution was concentrated by distillation at reduced pressure, and the residue was purified by flash chromatography on silica gel (hexane-ethyl acetate 4:6), giving **S70** (66 mg, 98%) as a white solid.

**<sup>1</sup>H NMR (CDCl<sub>3</sub>, 500 MHz):** δ 7.64 (s, 1H), 7.20 (s, 1H), 6.37 (dd, *J* = 9.9, 1.8 Hz, 1H), 6.22 (d, *J* = 5.9 Hz, 1H), 6.15 (d, *J* = 9.9 Hz, 1H), 6.03 (s, 1H), 5.05 (s, 1H), 4.66 (dd, *J* = 12.6, 1.9 Hz, 1H), 4.54 (d, *J* = 12.6 Hz, 1H), 4.16 (d, *J* = 2.3 Hz, 2H), 4.00 (d, *J* = 5.9 Hz, 1H), 2.53 (t, *J* = 2.3 Hz, 1H), 2.50 (s, 3H), 2.35 (hept, *J* = 6.8 Hz, 1H), 2.05 – 1.93 (m, 1H), 1.91 – 1.79 (m, 1H), 1.69 – 1.51 (m, 3H), 1.25 (s, 3H), 1.15 (s, 3H), 1.14 (d, *J* = 6.8 Hz, 3H), 1.13 (d, *J* = 6.8 Hz, 3H).

## SUPPORTING INFORMATION

**$^{13}\text{C}$  NMR (CDCl<sub>3</sub>, 125 MHz):**  $\delta$  186.76, 172.90, 164.76, 162.38, 152.85, 150.48, 149.51, 144.55, 122.96, 122.69, 121.76, 116.61, 114.76, 81.36, 79.47, 76.37, 75.34, 69.00, 56.36, 45.26, 42.75, 37.47, 34.14, 29.99, 27.66, 26.03, 25.14 (2C), 23.89, 18.82, 15.93.

**HRMS(ESI):**  $m/z$  calc. for C<sub>31</sub>H<sub>35</sub>O<sub>7</sub> [M+H]<sup>+</sup>: 519.2383, found: 519.2382.

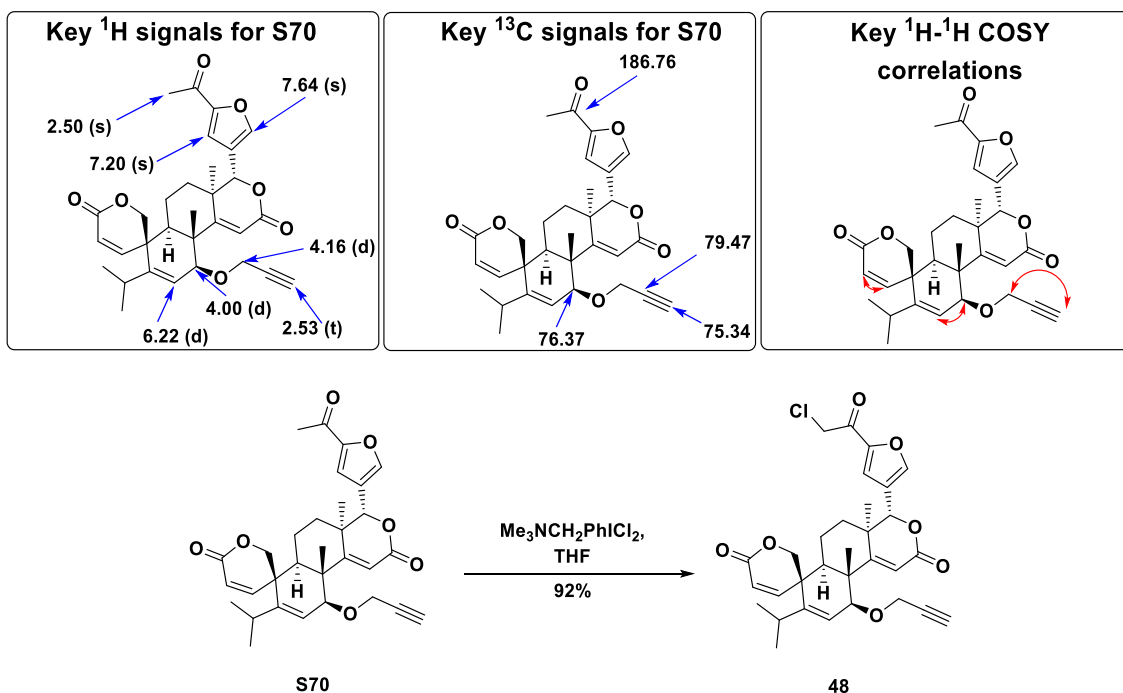

**Procedure:** Benzyltrimethylammonium dichloro iodide (70 mg, 0.20 mmol) was added to a solution of **S70** (52 mg, 0.10 mmol) in THF (4.3 mL). The resulting mixture was stirred at 40° C for 16 h. 10% sodium bicarbonate solution was added, and the aqueous layer was extracted three times with dichloromethane. The combined organic layers were washed with sodium thiosulfate saturate solution and brine. After drying over Na<sub>2</sub>SO<sub>4</sub>, the solution was concentrated by distillation at reduced pressure, and the residue was purified by flash chromatography on silica gel (hexane-ethyl acetate 1:1), giving **48** (51 mg, 92%) as a white solid.

**$^1\text{H}$  NMR (CDCl<sub>3</sub>, 500 MHz):**  $\delta$  7.69 (s, 1H), 7.36 (s, 1H), 6.36 (dd,  $J$  = 9.9, 1.8 Hz, 1H), 6.22 (d,  $J$  = 5.8 Hz, 1H), 6.16 (d,  $J$  = 9.9 Hz, 1H), 6.03 (s, 1H), 5.07 (s, 1H), 4.66 (dd,  $J$  = 12.6, 1.8 Hz, 1H), 4.58 (s, 2H), 4.55 (d,  $J$  = 12.6 Hz, 1H), 4.16 (d,  $J$  = 2.4 Hz, 2H), 4.01 (d,  $J$  = 5.8 Hz, 1H), 2.53 (t,  $J$  = 2.4 Hz, 1H), 2.54 – 2.52 (m, 1H), 2.35 (hept,  $J$  = 6.8 Hz, 1H), 2.05 – 1.96 (m, 1H), 1.89 – 1.81 (m, 1H), 1.68 – 1.62 (m, 1H), 1.60 – 1.53 (m, 1H), 1.25 (s, 3H), 1.15 (s, 3H), 1.14 (d,  $J$  = 6.8 Hz, 3H), 1.13 (d,  $J$  = 6.8 Hz, 3H)

**$^{13}\text{C}$  NMR (CDCl<sub>3</sub>, 125 MHz):**  $\delta$  180.28, 172.83, 164.58, 162.36, 150.56, 150.44, 149.55, 145.29, 123.56, 122.65, 121.79, 118.10, 114.79, 81.18, 79.43, 76.33, 75.37, 68.98, 56.33, 45.26, 44.99, 42.77, 37.45, 34.11, 29.99, 27.66, 25.15, 25.13, 23.88, 18.84, 15.91.

**HRMS(ESI):**  $m/z$  calc. for C<sub>31</sub>H<sub>34</sub>O<sub>7</sub>Cl [M+H]<sup>+</sup>: 553.1993, found: 553.1986.

**mp:** 110–111° C.

**Opt. Rot.:**  $[\alpha]_{\text{D}}^{25} = -57$  ( $c = 0.10$ , acetone).

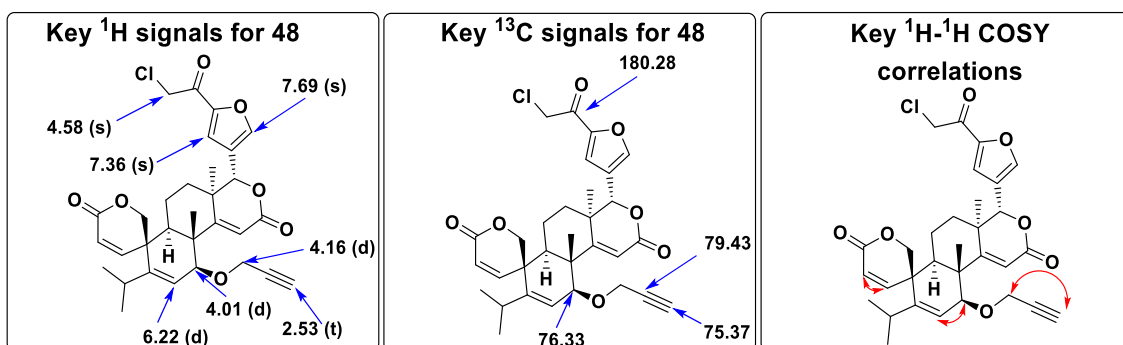

## SUPPORTING INFORMATION

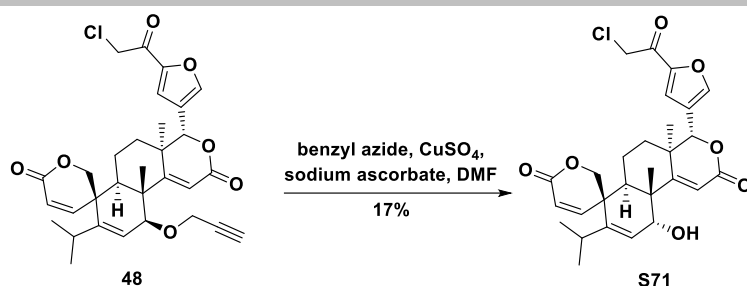

**Procedure:** Copper (II) sulfate (4 mg, 0.018 mmol) and sodium ascorbate (3 mg, 0.018 mmol) were added to a solution of **48** (10 mg, 0.018 mmol), benzyl azide (3 mg, 0.20 mmol) in DMF (0.5 mL) and the resulting mixture was stirred at 30° C for 16 h. Water was added, and the aqueous layer was extracted three times with dichloromethane. The combined organic layers were washed with two times with brine. After drying over Na<sub>2</sub>SO<sub>4</sub>, the solution was concentrated by distillation at reduced pressure, and the residue was purified by flash chromatography on silica gel (hexane-ethyl acetate 1:1), giving **S71** (2 mg, 17%) as a white solid.

**<sup>1</sup>H NMR (CDCl<sub>3</sub>, 500 MHz):** δ 7.68 (s, 1H), 7.33 (s, 1H), 6.34 (dd, *J* = 9.9, 1.9 Hz, 1H), 6.15 (d, *J* = 9.9 Hz, 1H), 6.02 (s, 1H), 6.02 (d, *J* = 6.2 Hz, 1H), 5.07 (s, 1H), 4.66 (dd, *J* = 12.6, 1.9 Hz, 1H), 4.56 (s, 2H), 4.53 (d, *J* = 12.6 Hz, 1H), 4.18 (d, *J* = 6.2 Hz, 1H), 2.50 (dd, *J* = 12.5, 7.4 Hz, 1H), 2.31 (hept, *J* = 6.8 Hz, 1H), 2.12 – 2.03 (m, 1H), 1.92 – 1.84 (m, 1H), 1.68 – 1.56 (m, 2H), 1.24 (s, 3H), 1.14 (s, 3H), 1.12 (d, *J* = 6.7 Hz, 3H), 1.10 (s, *J* = 6.7 Hz, 3H). (30 non-exchangeable protons)

**<sup>13</sup>C NMR (CDCl<sub>3</sub>, 125 MHz):** δ 180.29, 173.99, 164.44, 162.28, 150.67, 150.48, 148.63, 145.23, 123.99, 123.24, 121.91, 117.89, 114.55, 81.28, 70.14, 68.96, 45.43, 44.98, 43.68, 37.70, 33.04, 29.78, 26.96, 25.21, 25.03, 24.26, 18.27, 15.60.

**HRMS(ESI):** *m/z* calc. for C<sub>28</sub>H<sub>32</sub>O<sub>7</sub>Cl [M+H]<sup>+</sup>: 515.1837, found: 515.1854.

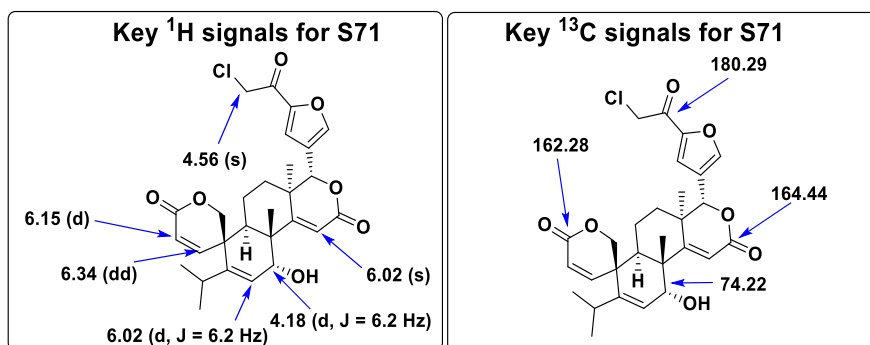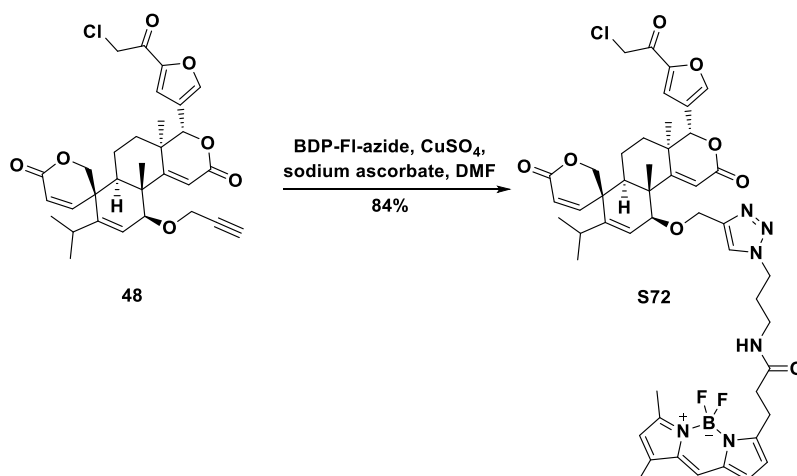

**Procedure:** Copper (II) sulfate (9 mg, 0.036 mmol) and sodium ascorbate (7 mg, 0.036 mmol) were added to a solution of **48** (20 mg, 0.36 mmol), BDP-FI-azide (14 mg, 0.36 mmol) in DMF (0.8 mL) and the resulting mixture was stirred at 30° C for 3 h. Water was added, and the aqueous layer was extracted three times with dichloromethane. The combined organic layers were washed with two times with brine. After drying over Na<sub>2</sub>SO<sub>4</sub>, the solution was concentrated by distillation at reduced pressure, and the residue was purified by flash chromatography on silica gel (ethyl acetate - methanol 99:1), giving **72** (28 mg, 84%) as an orange solid.

## SUPPORTING INFORMATION

**$^1\text{H}$  NMR (CDCl<sub>3</sub>, 500 MHz):**  $\delta$  7.65 (s, 1H), 7.58 (s, 1H), 7.32 (s, 1H), 7.11 (s, 1H), 6.90 (d,  $J$  = 4.0 Hz, 1H), 6.40 (dd,  $J$  = 9.9, 1.7 Hz, 1H), 6.33 (d,  $J$  = 5.7 Hz, 1H), 6.33 (d,  $J$  = 4.0 Hz, 1H), 6.29 (t,  $J$  = 6.2 Hz, 1H), 6.16 (s, 1H), 6.15 (d,  $J$  = 9.9 Hz, 1H), 5.50 (s, 1H), 5.00 (s, 1H), 4.70 – 4.59 (m, 3H), 4.57 (s, 2H), 4.54 (d,  $J$  = 12.5 Hz, 1H), 4.39 (t,  $J$  = 6.6 Hz, 2H), 3.83 (d,  $J$  = 5.7 Hz, 1H), 3.35–3.38 (m, 3H), 3.19 (dq,  $J$  = 12.9, 6.2 Hz, 1H), 2.72 – 2.64 (m, 2H), 2.57 (s, 3H), 2.56 – 2.50 (m, 1H), 2.41 – 2.31 (m, 1H), 2.27 (s, 3H), 2.19 – 2.12 (m, 2H), 2.05 – 1.97 (m, 1H), 1.86 – 1.81 (m, 1H), 1.63 – 1.50 (m, 2H), 1.17 (s, 3H), 1.16 (d,  $J$  = 6.7 Hz, 3H), 1.14 (d,  $J$  = 6.7 Hz, 3H), 1.08 (s, 3H).

**$^{13}\text{C}$  NMR (CDCl<sub>3</sub>, 125 MHz):**  $\delta$  180.28, 173.97, 172.18, 165.15, 162.41, 160.27, 157.38, 150.57, 149.60, 145.25, 144.07 (2C), 135.15, 133.33, 128.29 (2C), 123.94, 123.87, 123.32, 122.64, 121.72, 120.47, 118.03, 117.29, 114.18, 81.17, 74.72, 69.00, 60.92, 47.61, 45.39, 44.99, 42.70, 37.66, 36.20, 35.68, 33.81, 30.09, 29.74, 27.19, 25.38, 25.06, 24.80, 23.76, 18.29, 15.68, 14.97, 11.35.

**HRMS(ESI):**  $m/z$  calc. for C<sub>48</sub>H<sub>55</sub>N<sub>6</sub>O<sub>8</sub>ClF<sub>2</sub>B [M+H]<sup>+</sup>: 927.3831, found: 927.3802.

**Opt. Rot.:**  $[\alpha]_{\text{D}}^{25}$  = -74 ( $c$  = 0.04, acetone).

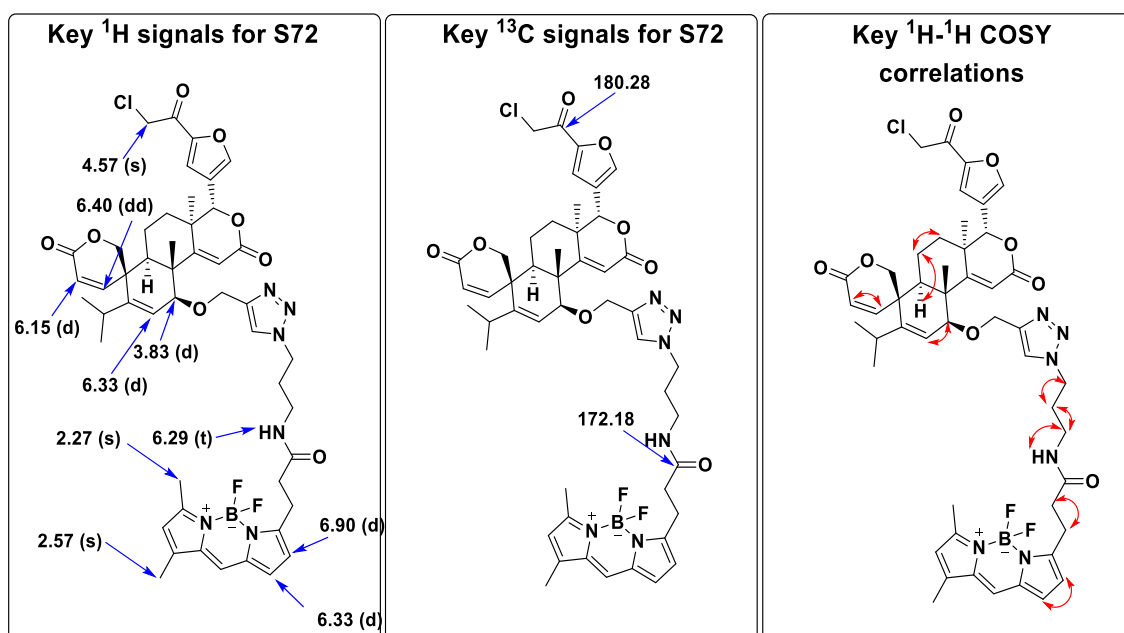

## SUPPORTING INFORMATION

## Computational Analyses

Library data for Chembridge Diverset<sup>TM</sup>-CL, Diverset<sup>TM</sup>-EXP, and Microformat libraries were obtained from ChemBridge website (<https://www.chembridge.com/>). Library data for approved antibacterials was obtained from the O'Shea and Moser.<sup>[8]</sup> Library data for approved cancer drugs was obtained from NCI as Approved Oncology Drugs Set VII (<https://wiki.nci.nih.gov/display/NCIDTPdata?Compound+Sets>). The Drugbank library and the Molecular Libraries Small Molecule Repository (MLSMR-NP) were obtained respectively from Drugbank website (<https://www.drugbank.ca/>) and PubChem website (<https://pubchem.ncbi.nlm.nih.gov/>). Natural product NPASS Compound Collection (NPASS) was obtained from Natural Product Activity and Species Source Database website (<http://bidd2.nus.edu.sg/NPASS/>). Lycorine and Pleuromutilin libraries are available at the following site <https://github.com/HergenrotherLab>. Limonin library is described herein. All the parameters were calculated using a Python program that implements RDKit. Source code can be found at the following site <https://github.com/HergenrotherLab>

## Murcko Scaffolds Analysis

For Murcko scaffolds, compound structures were converted in .sdf library format in ChemDraw (Cambridgesoft, Cambridge, MA). Murcko scaffolds were generated using ScaffoldGraph.<sup>[9]</sup>

The program using the Python Spyder editor with the following syntax:

```

"""
@author: lucia
"""

import scaffoldgraph as sg
import networkx as nx

import matplotlib.pyplot as plt

import numpy as np

from rdkit.Chem import Draw
from rdkit import Chem
import rdkit
import random
import os
from collections import Counter

###
sdf_file = ('fullset-limonin.sdf') # Example SDF file (Limonin CtD library)
supplier = Chem.SDMolSupplier(sdf_file)
network = sg.ScaffoldNetwork.from_sdf(sdf_file, progress=True)

# We can access the number of molecule nodes and scaffold nodes in the graph
n_scaffolds_net = network.num_scaffold_nodes
n_molecules_net = network.num_molecule_nodes

print("\nGenerated scaffold network from [4] molecules with {} scaffolds\n".format(n_molecules_net, n_scaffolds_net))

molecules = list(network.get_molecule_nodes())

# Calculate number of scaffolds and singletons
frag_to_save = []
for i in range(len(molecules)):
    mol_id = i
    pubchem_id = molecules[mol_id]
    smiles_iter = network.nodes[pubchem_id]['smiles']
    frags_iter = sg.get_all_murcko_fragments(Chem.MolFromSmiles(smiles_iter))
    num_rings = []
    for mol in frags_iter:
        num_rings.append(rdkit.Chem.rdMolDescriptors.CalcNumRings(mol))
    m = max(num_rings)
    position_max = [i for i, J in enumerate(num_rings) if J == m]
    frag_to_save.append(frags_iter[position_max[0]])
list_smiles = []
for frag_saved in frag_to_save:
    list_smiles.append(Chem.MolToSmiles(frag_saved))

smiles_no_duplicate = set(list_smiles)

count_unique_smiles = Counter(list_smiles)
number_of_unique_smiles = []

```

## SUPPORTING INFORMATION

---

```
for key_count in count_unique_smiles.keys():
    if count_unique_smiles[key_count]==1:
        number_of_unique_smiles.append(count_unique_smiles[key_count])
# Number of scaffold
N = len(smiles_no_duplicate)
Nsing = sum(number_of_unique_smiles)
```

```
print("Number of scaffolds is",N)
print("Number of singletons is",Nsing)
```

### Scaffold Tree Analysis

For scaffold tree analysis, compound structures were converted in .sdf library format in ChemDraw (Cambridgesoft, Cambridge, MA). For each dataset, all duplicated fragments were removed and the numbers of unique fragments were counted. Scaffold Trees were generated using ScaffoldGraph.<sup>[9]</sup>

### Tanimoto Similarity matrix

For the Tanimoto Similarity analysis (**Figure S28**), compound structures were converted in .sdf library format in ChemDraw (Cambridgesoft, Cambridge, MA). Tanimoto similarity coefficients were calculated using Canvas 2018 (Schrödinger, New York, NY), using the Similarity/Distance Matrix application with radial fingerprints (ECFP). The obtained values were exported to Excel (Microsoft, Redmond, WA) where a heatmap was generated using a three color scale set to 0.0 (blue), 0.5 (yellow), and 1.0 (red).

## SUPPORTING INFORMATION

## Biological Studies

## Methods

**Cell culture:** Cells were grown at 37 °C under a humidified 5% CO<sub>2</sub> atmosphere in a culture media consisting of high-glucose (Life Technology) DMEM media for A172 (glioblastoma) cells and HepG2 (hepatocellular carcinoma), or EMEM media for HOS (osteosarcoma) cells, or RPMI 1640 for A549 (lung carcinoma), ES-2 (ovarian carcinoma), HCT116 (colorectal carcinoma), and MDA-MB-231 (triple-negative breast cancer) cells. All media were supplemented with 10% FBS (Gemini) and 1% penicillin/streptomycin. All cell lines were authenticated by the University of Arizona Genetics Core using an autosomal STR profile.

**Anticancer screen:** For each cell line, 40 µL of the appropriate media were added to two 384-well plates. At the UIUC High-throughput Screening Facility, a Thermo Scientific Matrix PlateMate Plus was used to transfer 100 nL of 10 mM compound stocks in DMSO to one plate for each cell line. 100 nL DMSO was added to the other plate for each cell line. Plates were kept at room temperature until seeding. Cells were harvested and put on ice for at least 5 minutes before seeding 10 µL of the appropriate concentration of cells (1000 cells/well) in one plate with compound and one with DMSO. 1 µL of 2.5 mM Raptinal was added as a dead control. Plates were sealed with gas-permeable seals and left at room temperature for 45 minutes before being put in the incubator. Plates were incubated for 72 hours and then 5 µL of Alamar blue was added to each well, and allowed to incubate for 3-4 h, until a visible color change occurred. Fluorescence was measured in a Molecular Devices SpectraMax M3 (excitation wavelength: 555 nm; emission wavelength: 585 nm; cutoff 570 nm; autogain). The percent cell death calculated for the plates treated with DMSO was subtracted from the compound treated plates.

**Cell viability assay:** Cells were seeded according to **Table S11** below in a 96-well plate and allowed to attach overnight. To each well, 1 µL of the investigation compound in DMSO was added (1% final concentration). On each plate, at least 3 technical replicates per compound were performed. DMSO was used as a negative control and Raptinal (final concentration 50 µM) as a positive control. Plates were incubated at 37 °C for 72 hours. At that time, 10 µL of Alamar blue was added to each well and allowed to incubate for 3-4 h, until a visible color change occurred. Fluorescence was measured as described above. Wells were normalized to DMSO- and Raptinal-treated cells. IC<sub>50</sub> values were calculated using OriginPro 2019 (OriginLab). IC<sub>50</sub> values are reported as the average of three separate experiments along with SEM values.

**Table S11.** Cell line seeding densities for cell viability assay

| Cell line | Cell/well | Cell line  | Cell/well |
|-----------|-----------|------------|-----------|
| HCT116    | 3000      | HOS        | 2500      |
| ES2       | 3000      | MDA-MB-231 | 3000      |
| A172      | 3000      | Hep-G2     | 8000      |
| A549      | 3000      |            |           |

#### Cell viability via Flow cytometry

HCT116 cells (300,000 cells/well) were plated overnight in 6-well plates, prior to addition of compounds. For protection studies, samples were pre-treated with 25 µM Q-VD-PPH for two hours before compound addition. Cells were incubated for 24 h and harvested in flow tubes along with media and debris. Tubes were centrifuged at 1000 RCF for 3 minutes. Cells were washed with PBS and then resuspended in 450 µL of Annexin V binding buffer (10 mM HEPES, 2.5 mM CaCl<sub>2</sub>, 150 mM NaCl, pH 7.4) with Annexin V-FITC (Southern Biotech 10040-02) (2.8 µL per sample) and propidium iodide (Sigma Aldrich) (0.25 µL of 1 mg/mL solution per sample). Samples were protected from light and kept on ice until testing. Samples were analyzed on a BD LSR II Flow Cytometry Analyzer. Ten thousand events were recorded per sample using FCS Express Version 5. Percent death was calculated by subtracting the lower left quadrant from 100.

#### Western blot

HCT116 cells were pre-treated with 25 µM Q-VD-OPh for 2 h. Then compound was added and cells were incubated for 24 h. Cells were harvested by centrifugation (3 min, 1000 RCF), washed with PBS and resuspended in RIPA lysis buffer (10 mM Tris base, 1 mM EDTA, 0.5 mM EGTA, 1% Triton-X-100, 0.1% sodium deoxycholate, 0.1% SDS, 140 mM NaCl with a 1:100 dilution of Protease Inhibitor Cocktail Set III (Calbiochem)). Protein concentration was assessed using a BCA protein assay (Pierce). Samples were resolved in a 4-20% gradient SDS-PAGE gel (Bio-Rad) at 160 V for 40 minutes, and then transferred to an activated PVDF membrane (Millipore) in Towbin transfer buffer (192 mM glycine, 25 mM Tris- HCl, 20% methanol, pH = 8.3) for 2 h at 45 V. Membranes were blocked for 1 h at 4 °C in bovine serum albumin [BSA] and then incubated with primary antibodies overnight at 4 °C. (Cell Signaling Technology, procaspase-3 9662, PARP-1 9542, β-actin 4970). Blots were washed with TBST and incubated with secondary antibody for 1 h. Blots were imaged in SuperSignal West Pico Solution (Pierce) using a BioRad ChemiDoc Touch with Image Lab software.

SUPPORTING INFORMATION

---

**Hemolysis assay**

100  $\mu$ l of whole blood was combined with 500  $\mu$ l of saline and centrifuged for 5 min at 4 °C at 300 xg. The supernatant was aspirated and cells were resuspended in 500  $\mu$ l saline and the process was repeated three times to wash cells. Cells were then resuspended in 800  $\mu$ l red blood cell buffer (10 mM  $\text{Na}_2\text{HPO}_4$  (pH7.4), 150 mM NaCl, 1 mM  $\text{MgCl}_2$  in water). 19  $\mu$ l of red blood cell buffer was added to PCR tubes followed by 1  $\mu$ l of DMSO solution of compounds. 30% triton X-100 in water was used as a positive control. Tubes were centrifuged to combine everything. Then, 10  $\mu$ l of washed red blood cells were added to each tube. Tubes were incubated at 37 °C for 2 h and then centrifuged for 5 min, 300 xg at 4 °C. 20  $\mu$ l of the supernatant was transferred to wells of a clear bottom 384-well plate and absorbance read at 540nm. The percent lysis was normalized to the positive control at 100%. All samples were done in triplicate. Compounds were tested at three concentrations (10  $\mu$ M, 25  $\mu$ M and 50  $\mu$ M).



## SUPPORTING INFORMATION

**Abbreviations**

**BDP-FI-azide:** *N*-(3-azidopropyl)-3-(5,5-difluoro-7,9-dimethyl-5*H*-5l4,6l4-dipyrrolo[1,2-*c*:2',1'-*f*][1,3,2]diazaborinin-3-yl)propanamide

**DCM:** dichloromethane

**DMAP:** 4-Dimethylaminopyridine

**DMF:** dimethylformamide

**DMP:** Dess–Martin periodinane

**EDC:** 1-Ethyl-3-(3-dimethylaminopropyl)carbodiimide

**EtOAc:** ethyl acetate

**ESI:** electrospray ionization

**HOBt:** Hydroxybenzotriazole

**HRMS:** high-resolution mass spectra

**LCMS:** liquid chromatography–mass spectrometry

***m*CPBA:** *meta*-Chloroperoxybenzoic acid

**mp:** melting point

**MS:** mass spectra

**NCS:** *N*-Chlorosuccinimide

**NMR:** nuclear magnetic resonance

**Py:** pyridine

***p*TsOH:** *para*-Toluenesulfonic acid

**(*R,R*)-Mn(salen1)Cl:** (*R,R*)-(-)-*N,N'*-Bis(3,5-di-*tert*-butylsalicylidene)-1,2-cyclohexanediaminomanganese(III) chloride

**SEM:** Standard error of the mean

**TEA:** triethylamine

**THF:** tetrahydrofuran

## References

- [1] Y. Xu, Y. Yang, Q. Zhu, X. Wang, G. Gong, L. Yang, China Pharmaceutical University, Peop. Rep. China . **2014**, p. 16pp.
- [2] O. H. Emerson, *J. Am. Chem.* **1952**, *74*, 688-693.
- [3] G. Ruberto, A. Renda, C. Tringali, E. M. Napoli, M. S. J. Simmonds, *J. Agric. Food Chem.* **2002**, *50*, 6766-6774.
- [4] T. A. Geissman, V. Tulagin, *J. Org. Chem.* **1946**, *11*, 760-770.
- [5] Y. Xu, Y. Yang, A. Jiang, Q. Zhu, G. Gong, China Pharmaceutical University, Peop. Rep. China . **2015**, p. 22pp.
- [6] Y. Xu, Y. Yang, Q. Zhu, S. Wang, X. Han, C. Jia, China Pharmaceutical University, Peop. Rep. China . **2018**, p. 22pp.
- [7] Y. Xu, G. He, C. Jia, Q. Zhu, Z. Chu, Y. Ji, G. Gong, China Pharmaceutical University, Peop. Rep. China; Hefei Industrial Pharmaceutical Co., Ltd. . **2017**, p. 26pp.
- [8] R. O'Shea, H. E. Moser, *J. Med. Chem.* **2008**, *51*, 2871-2878.
- [9] O. B. Scott, A. W. Edith Chan, *Bioinformatics* **2020**, *36*, 3930-3931.

**Spectral Data**

## SUPPORTING INFORMATION

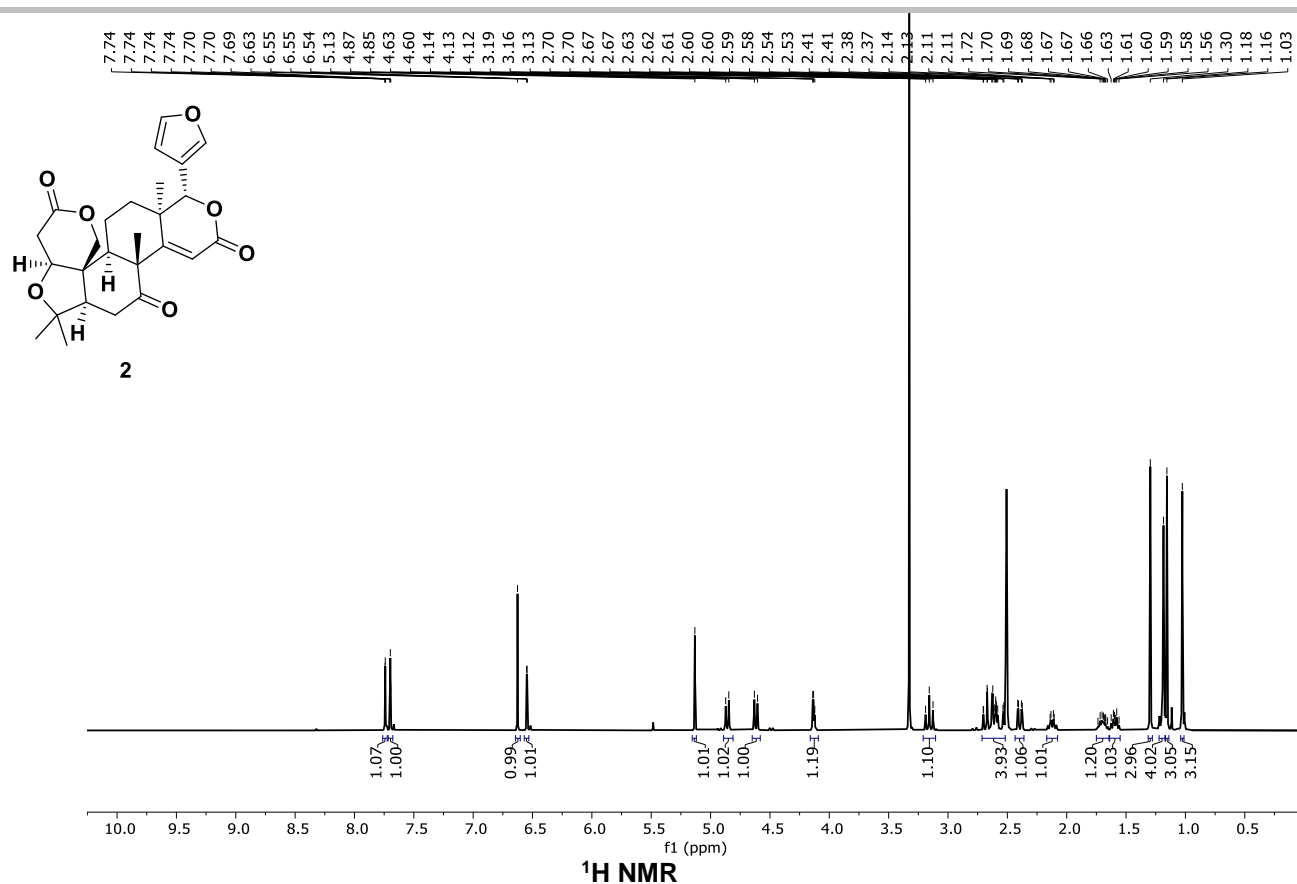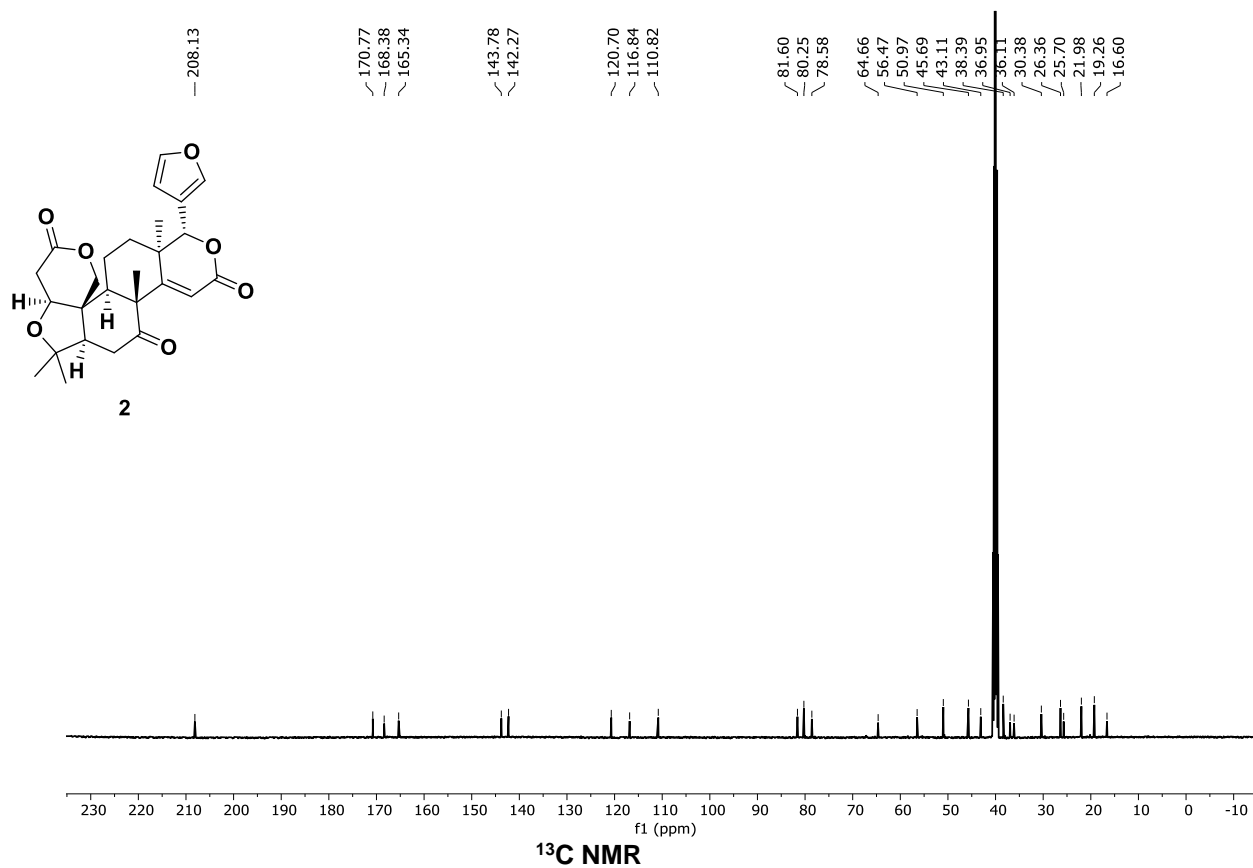

## SUPPORTING INFORMATION

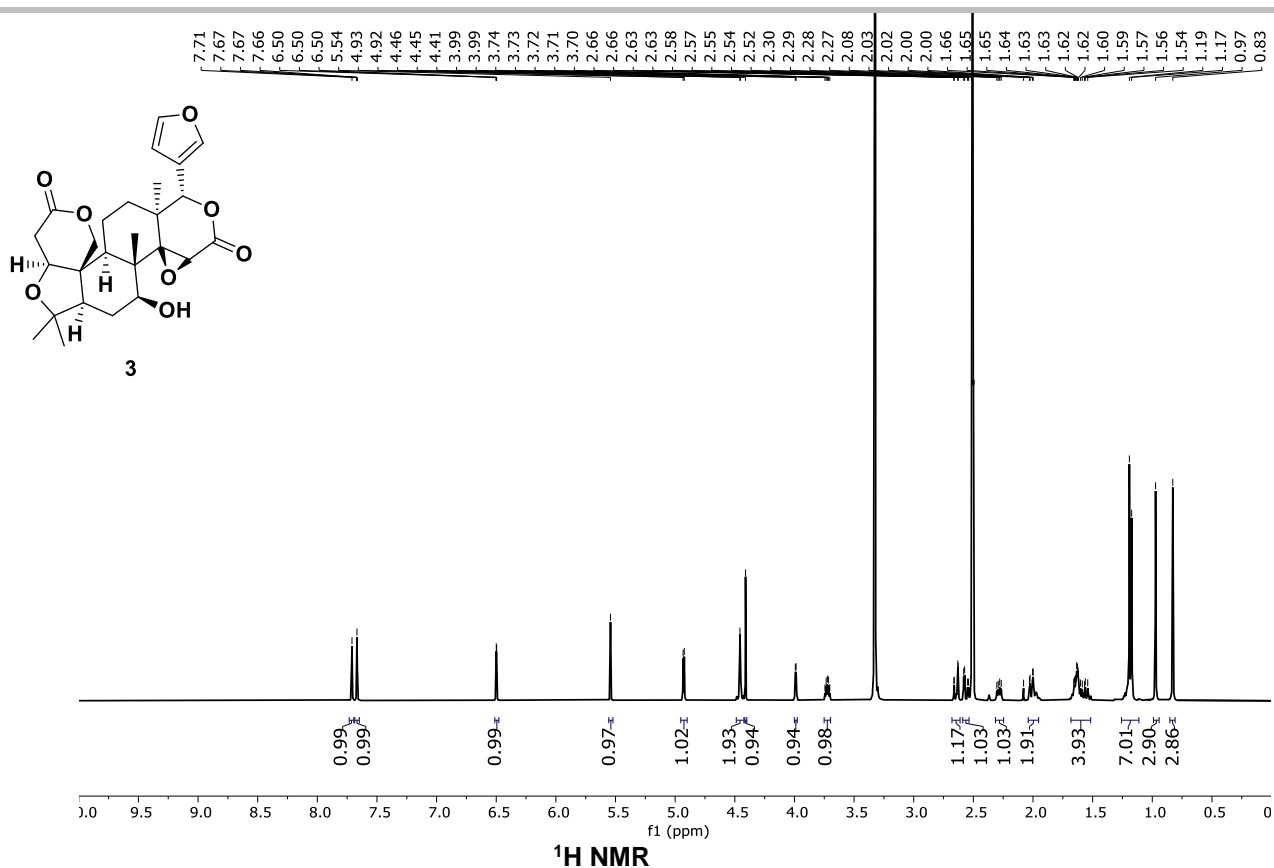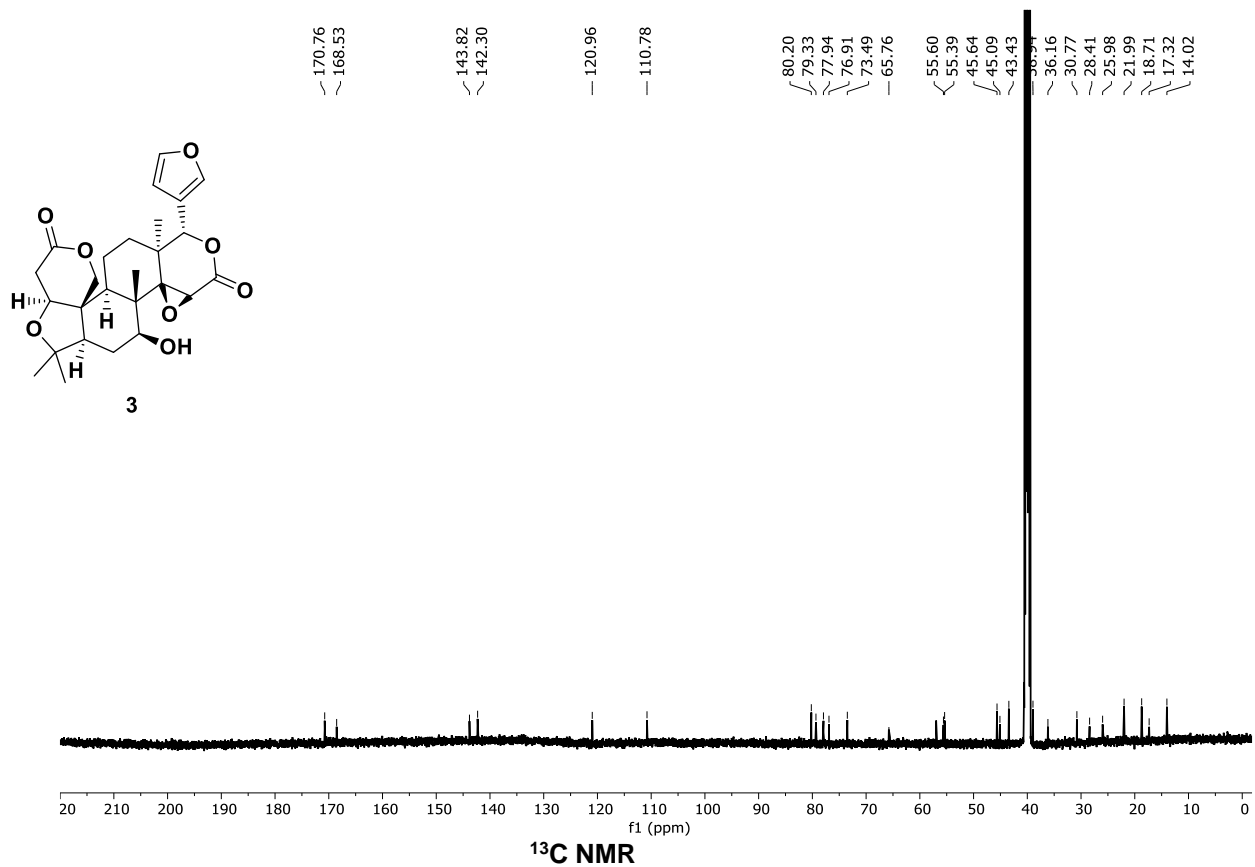

## SUPPORTING INFORMATION

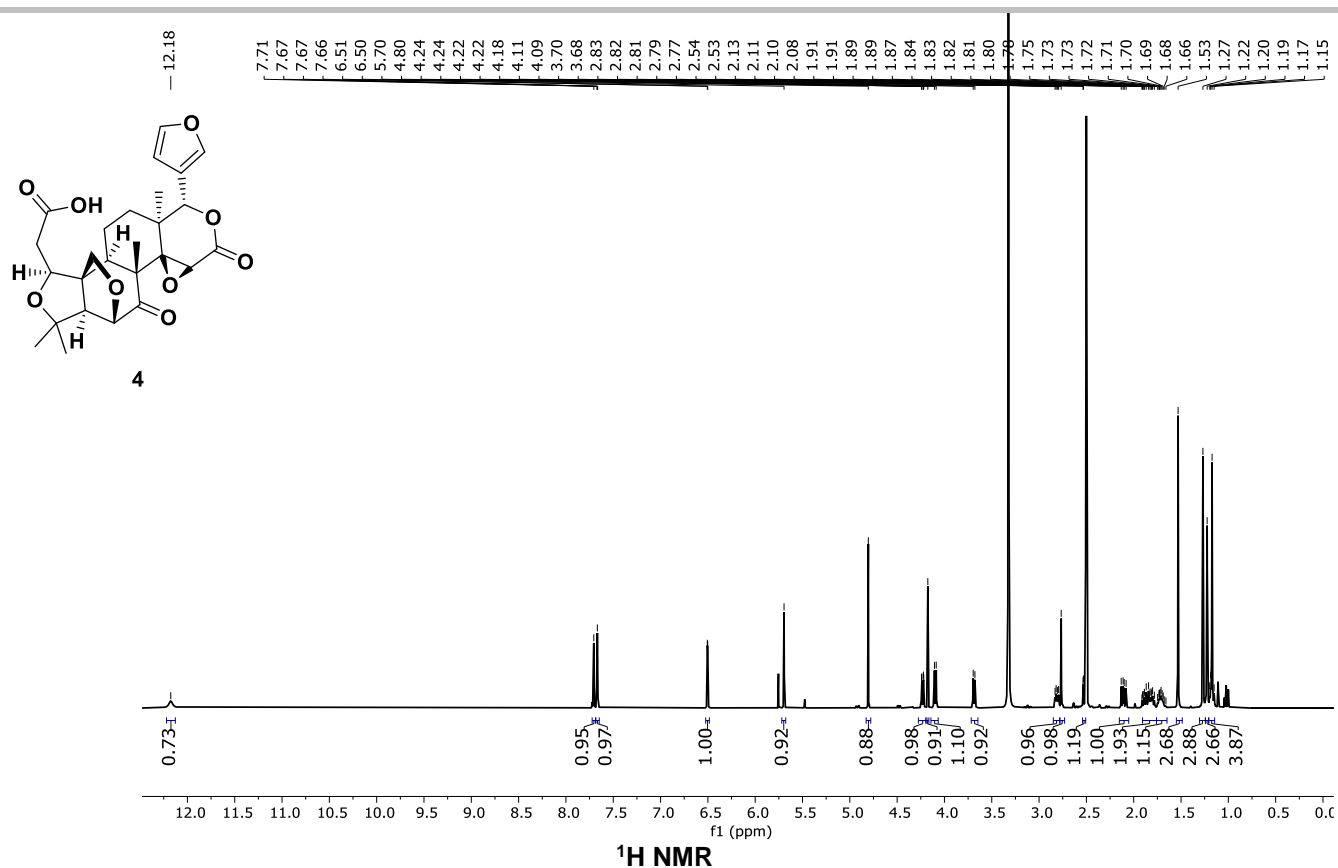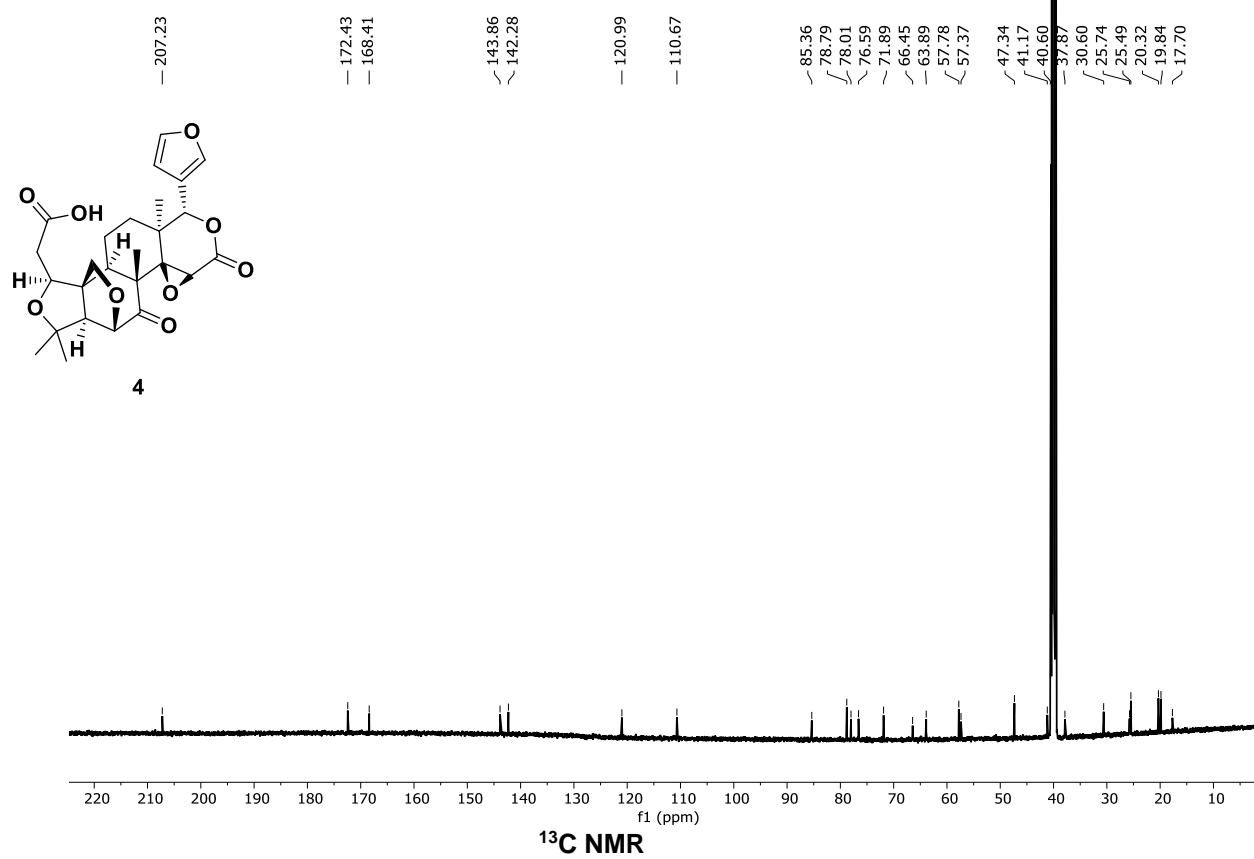

## SUPPORTING INFORMATION

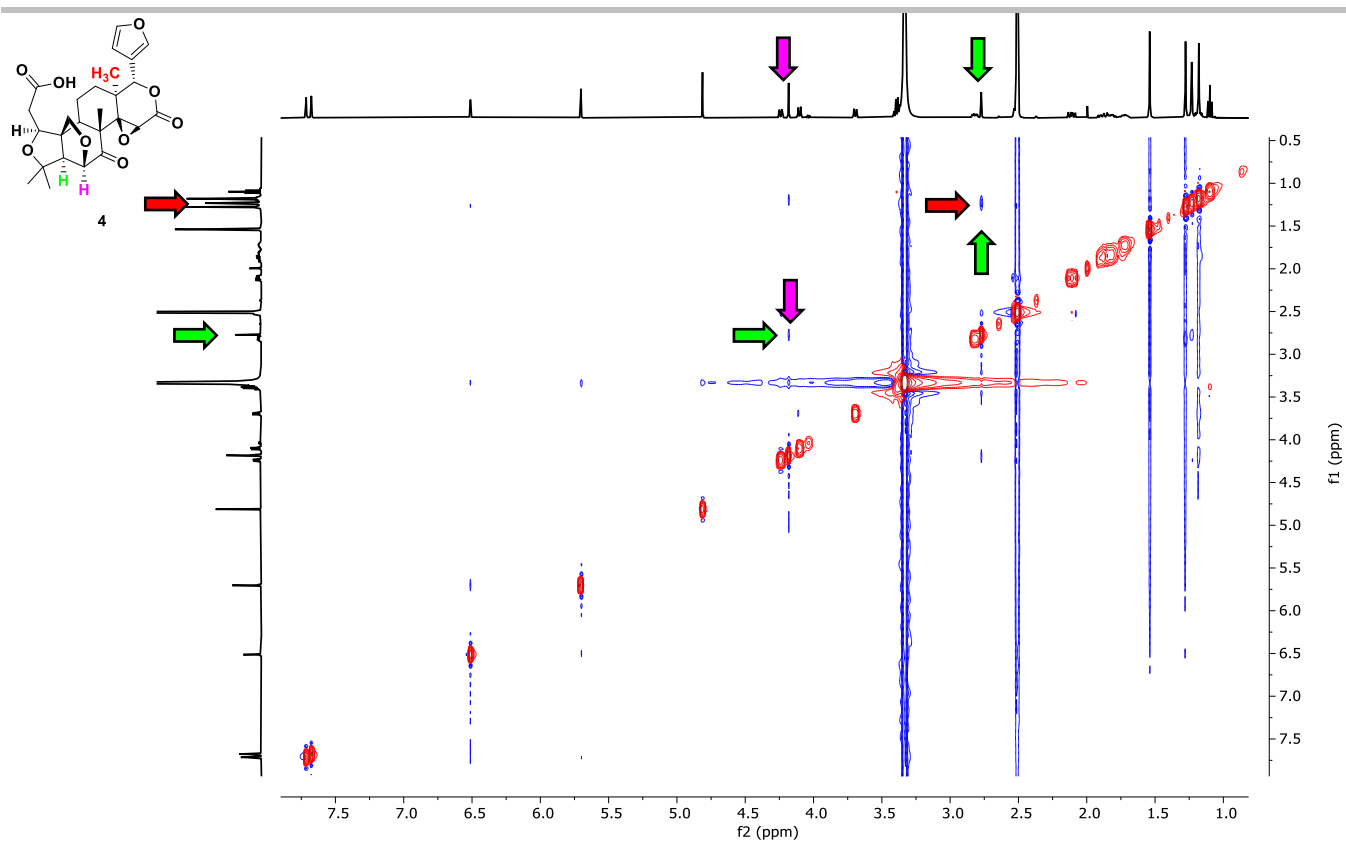 $^1\text{H}$ - $^1\text{H}$  NOESY NMR

## SUPPORTING INFORMATION

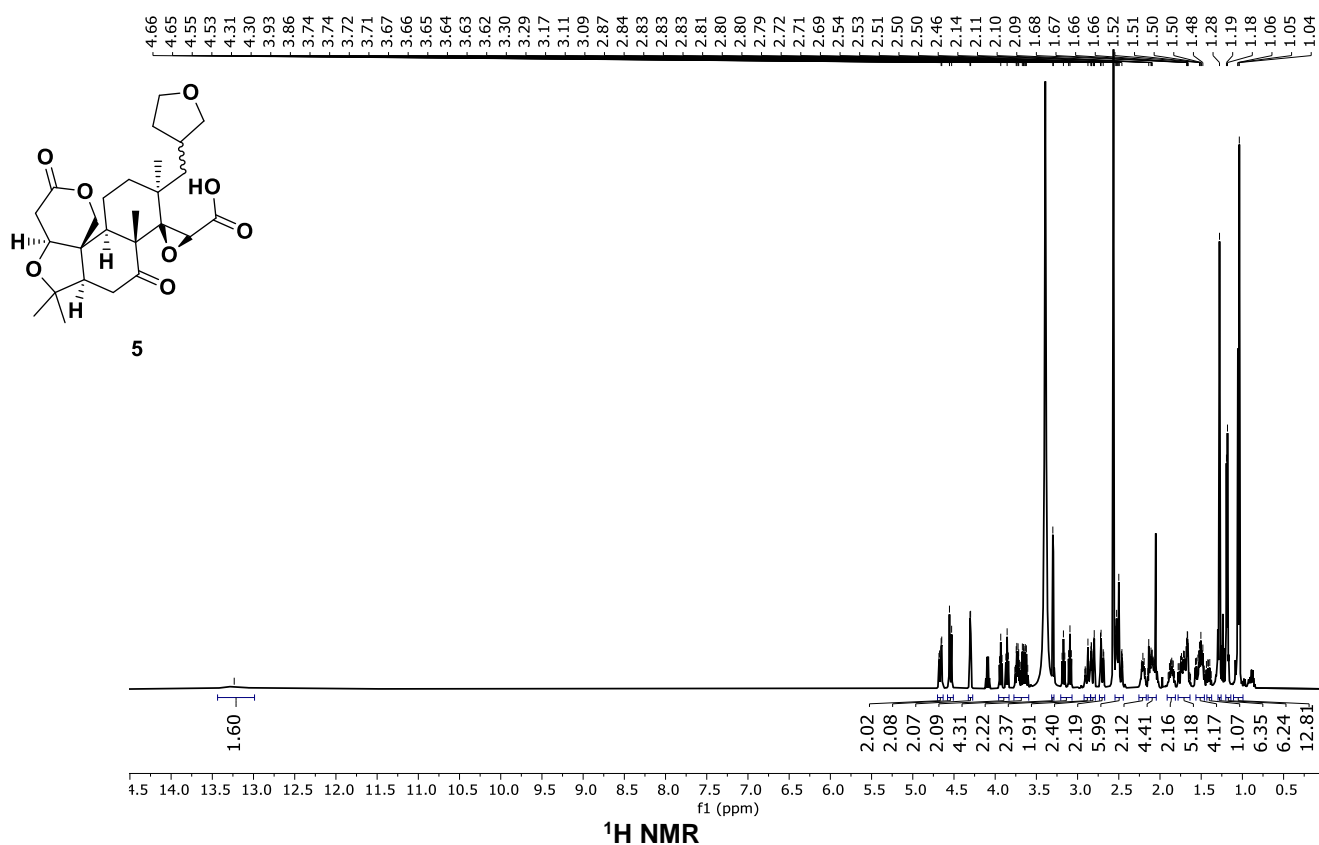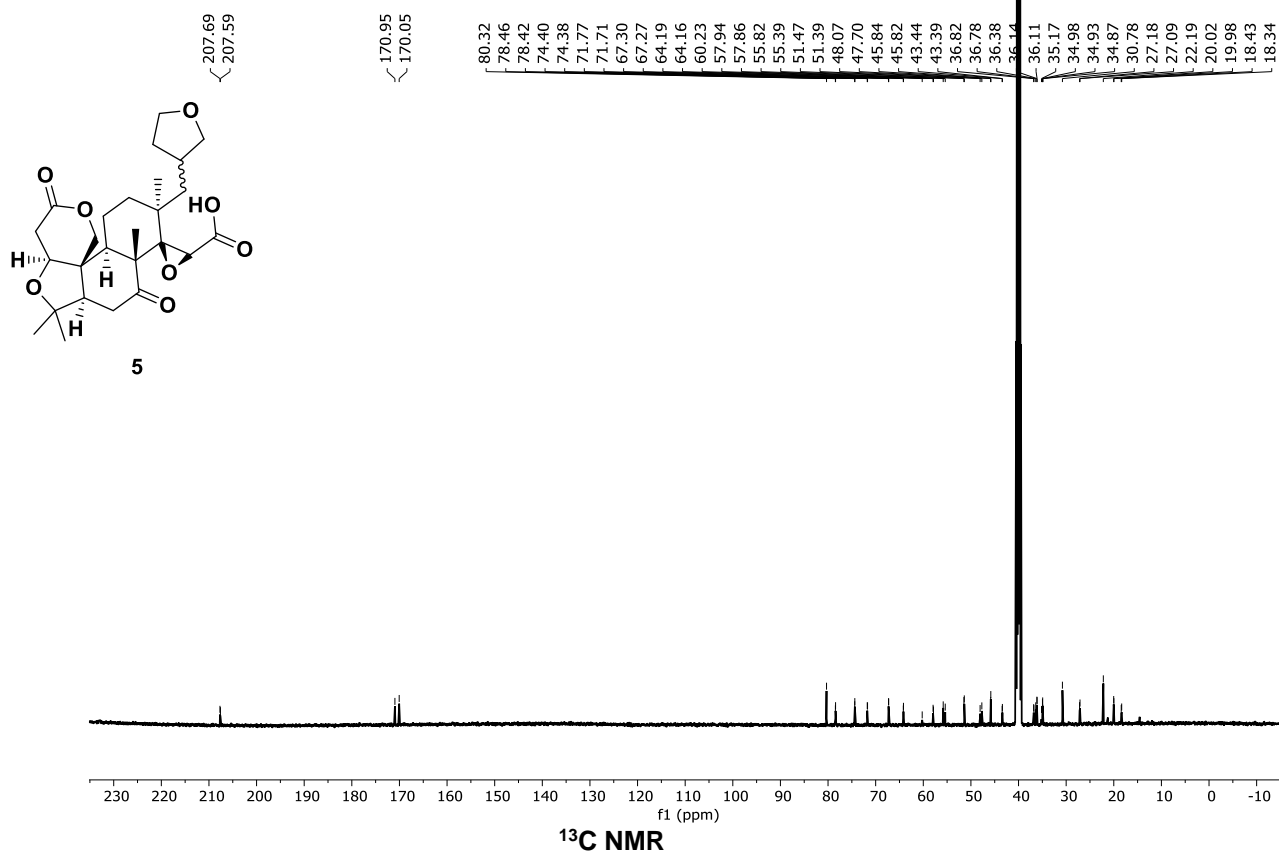



## SUPPORTING INFORMATION

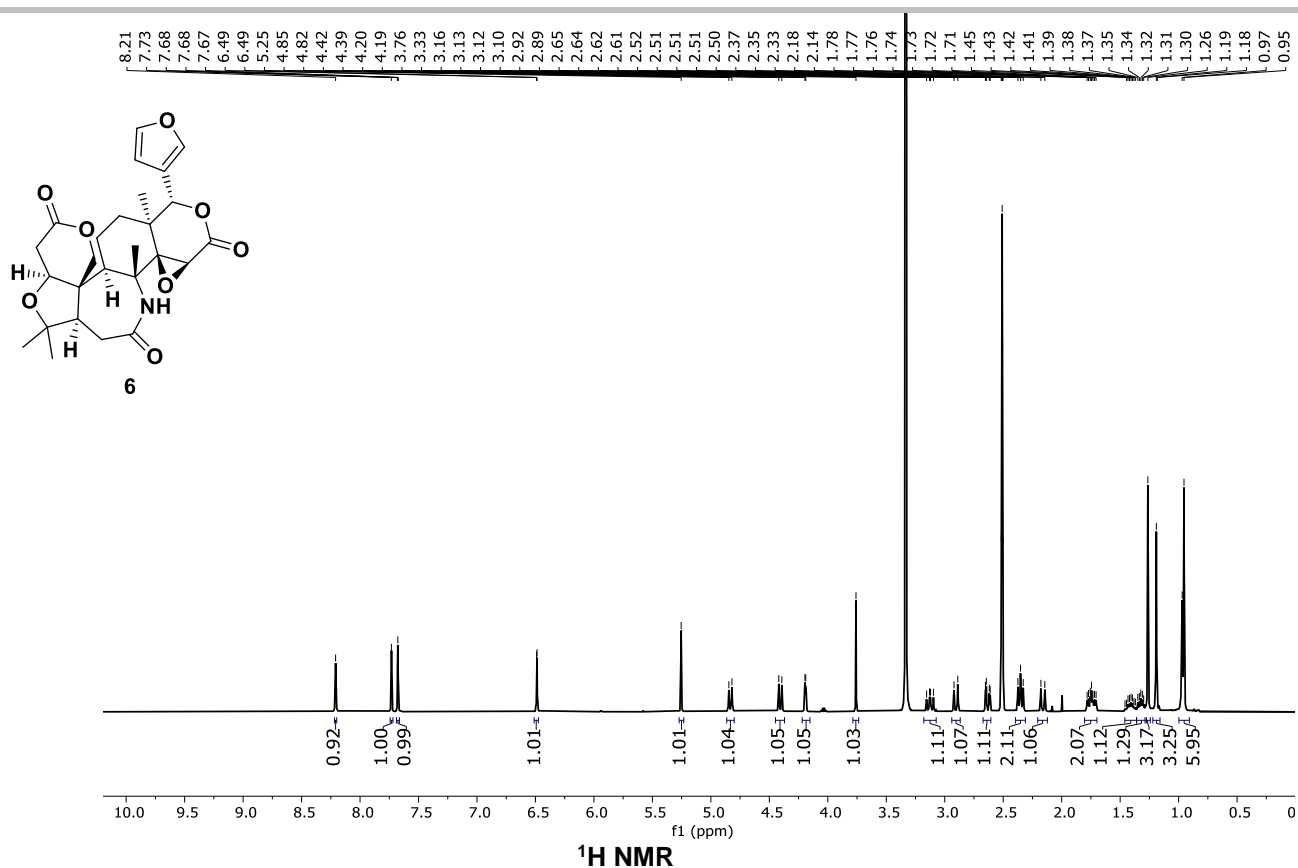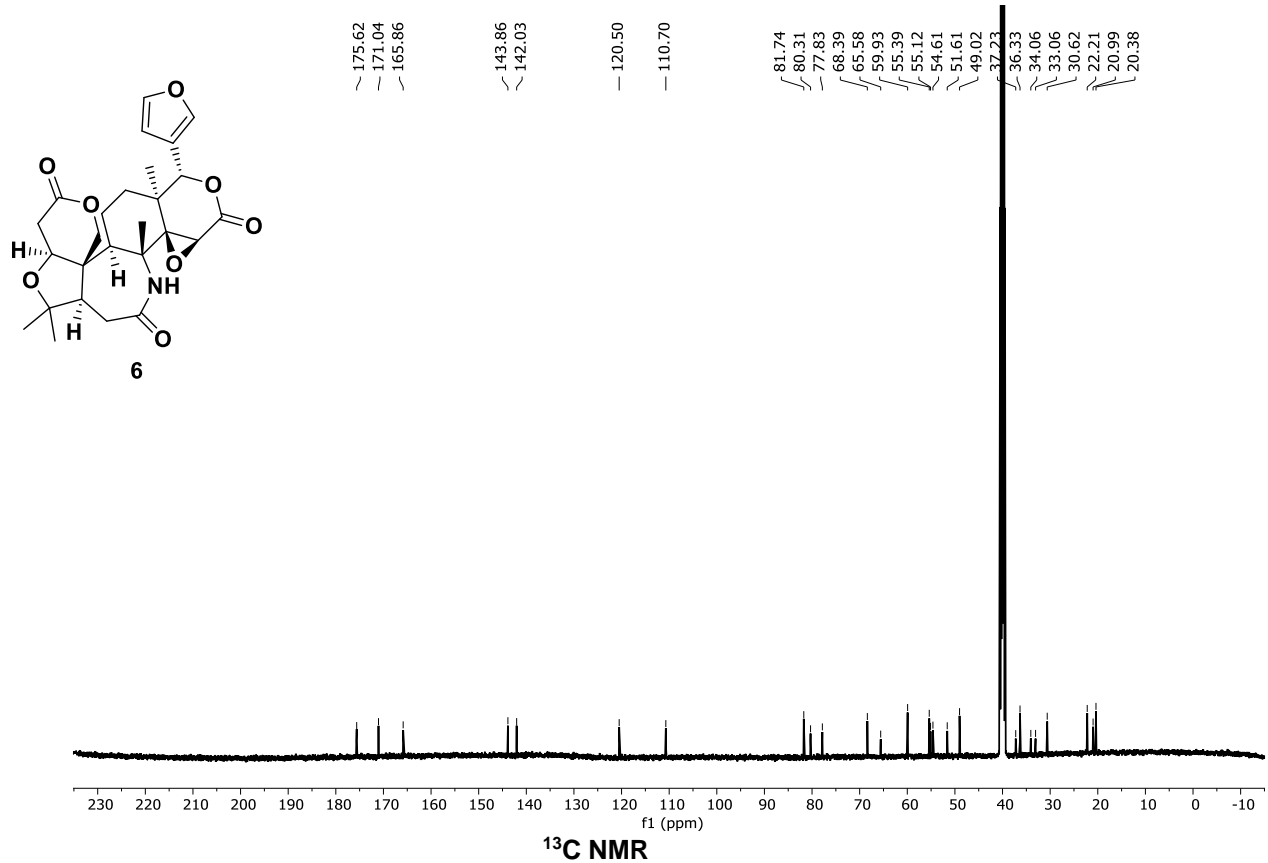

## SUPPORTING INFORMATION

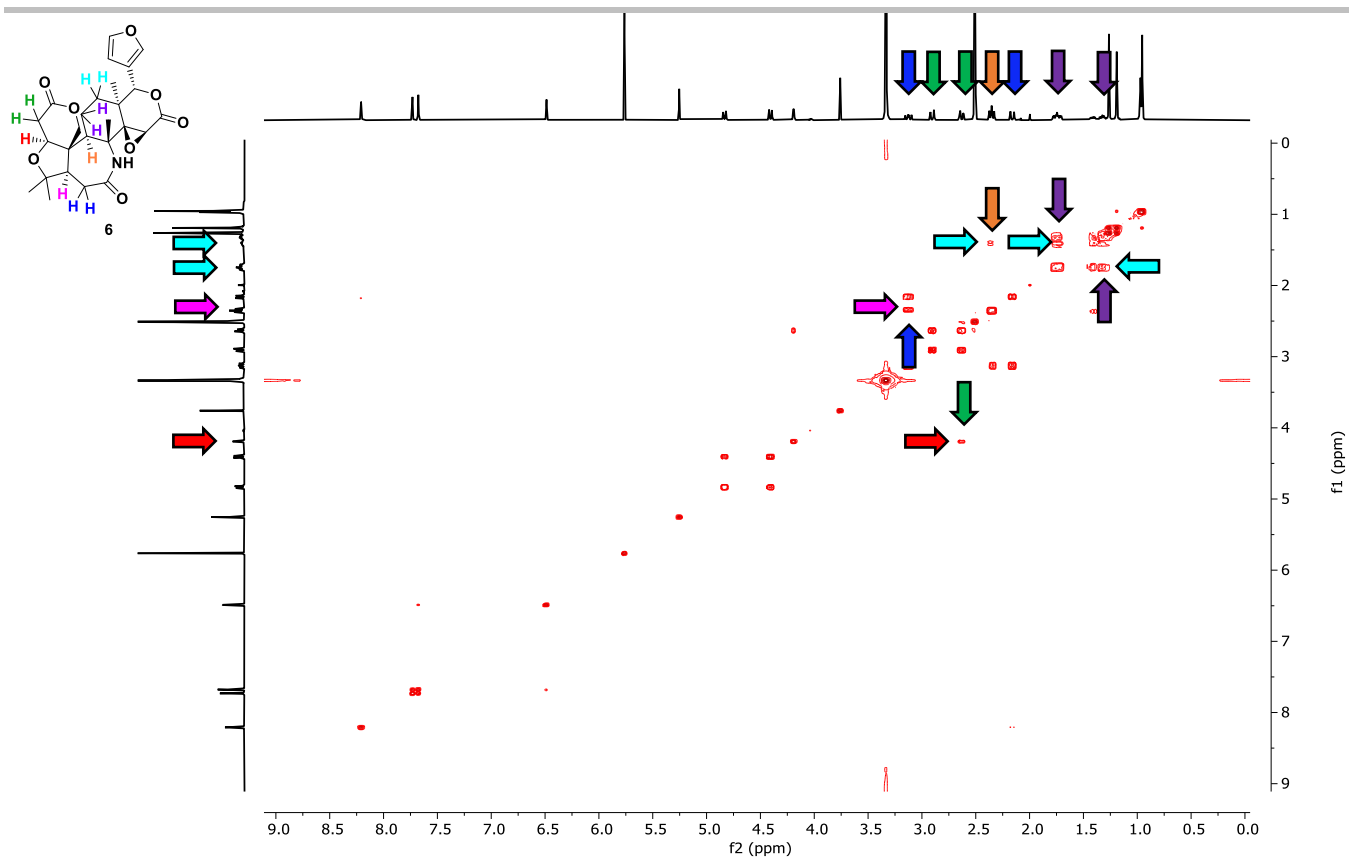 $^1\text{H}$ - $^1\text{H}$  COSY NMR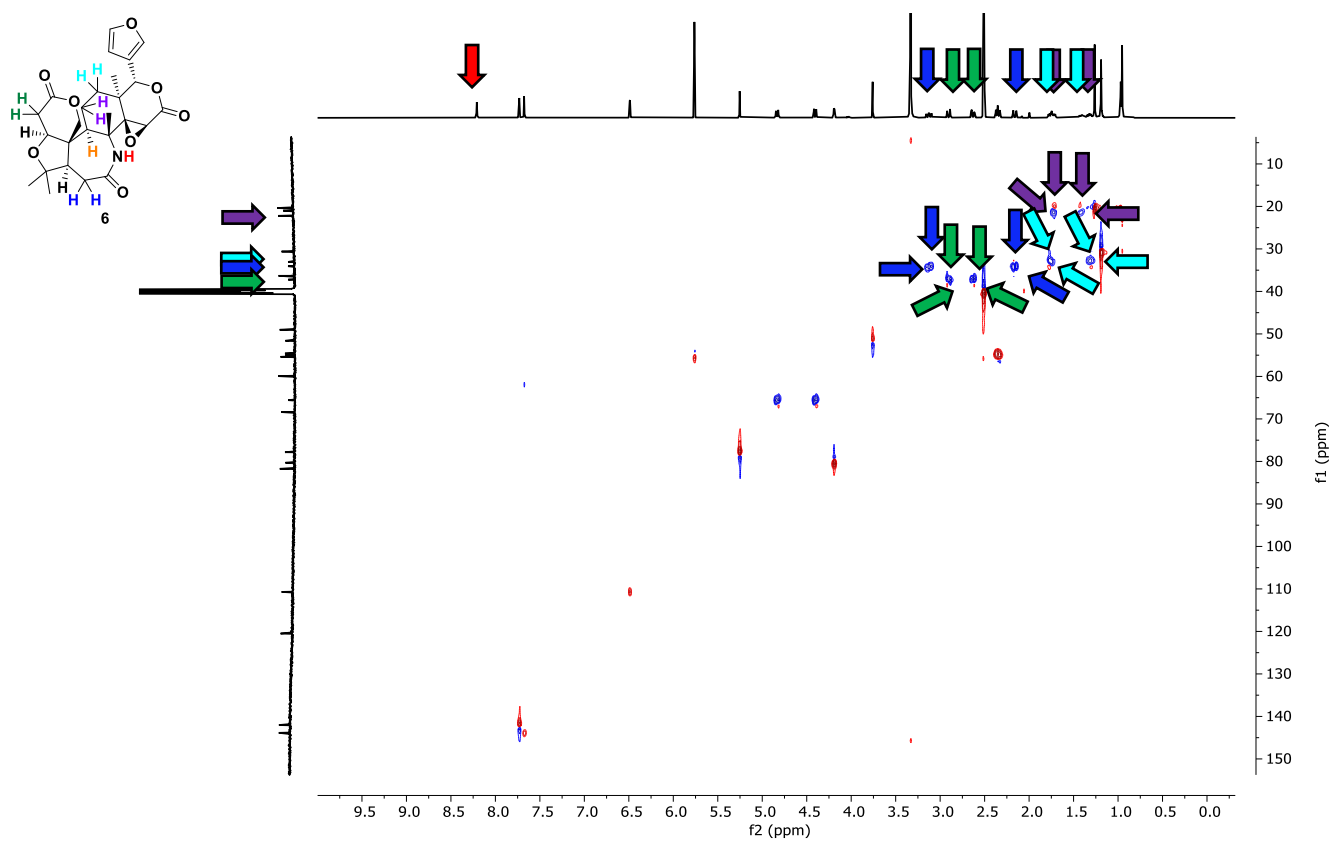 $^1\text{H}$ - $^{13}\text{C}$  HSQC NMR

## SUPPORTING INFORMATION

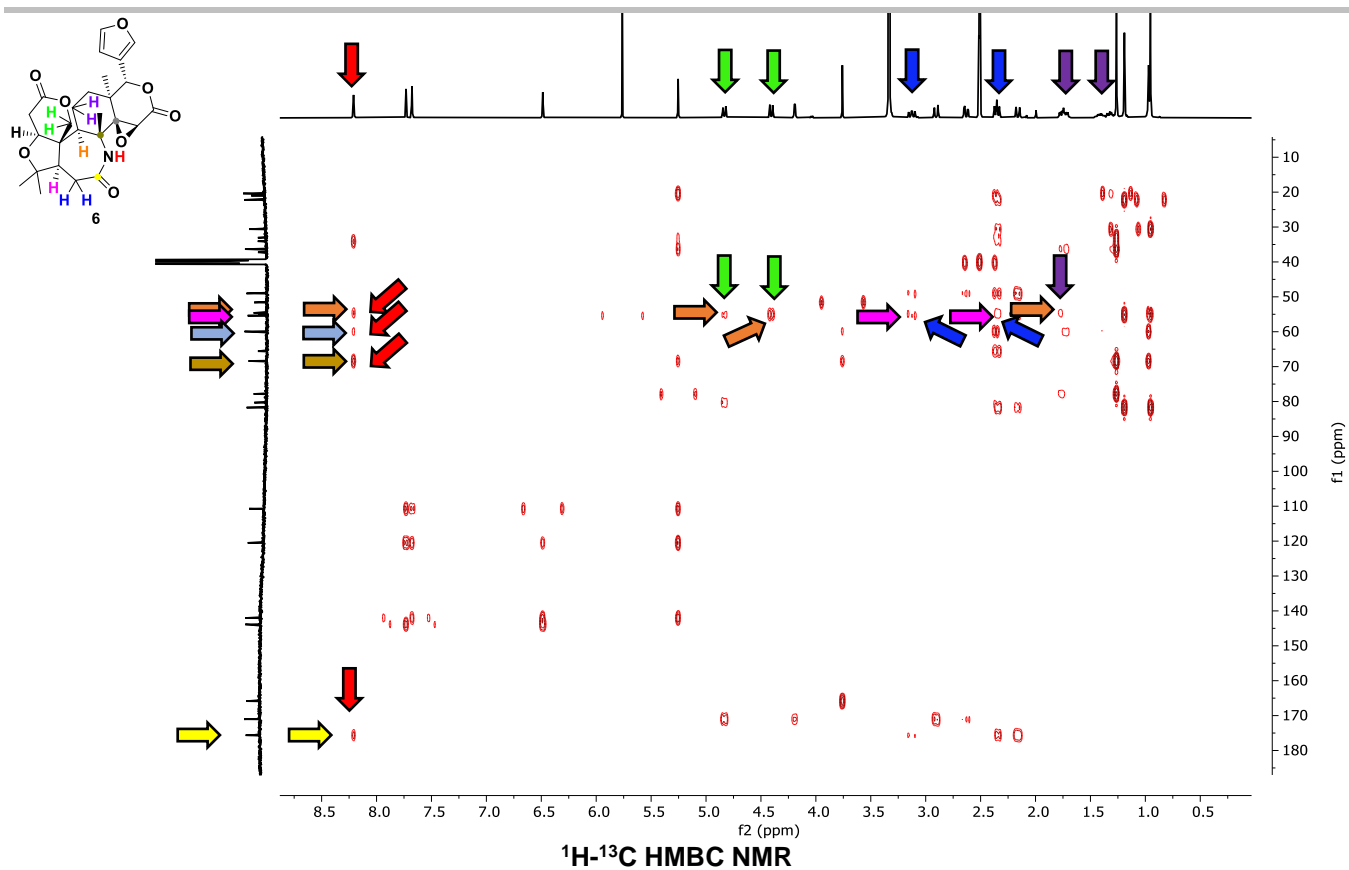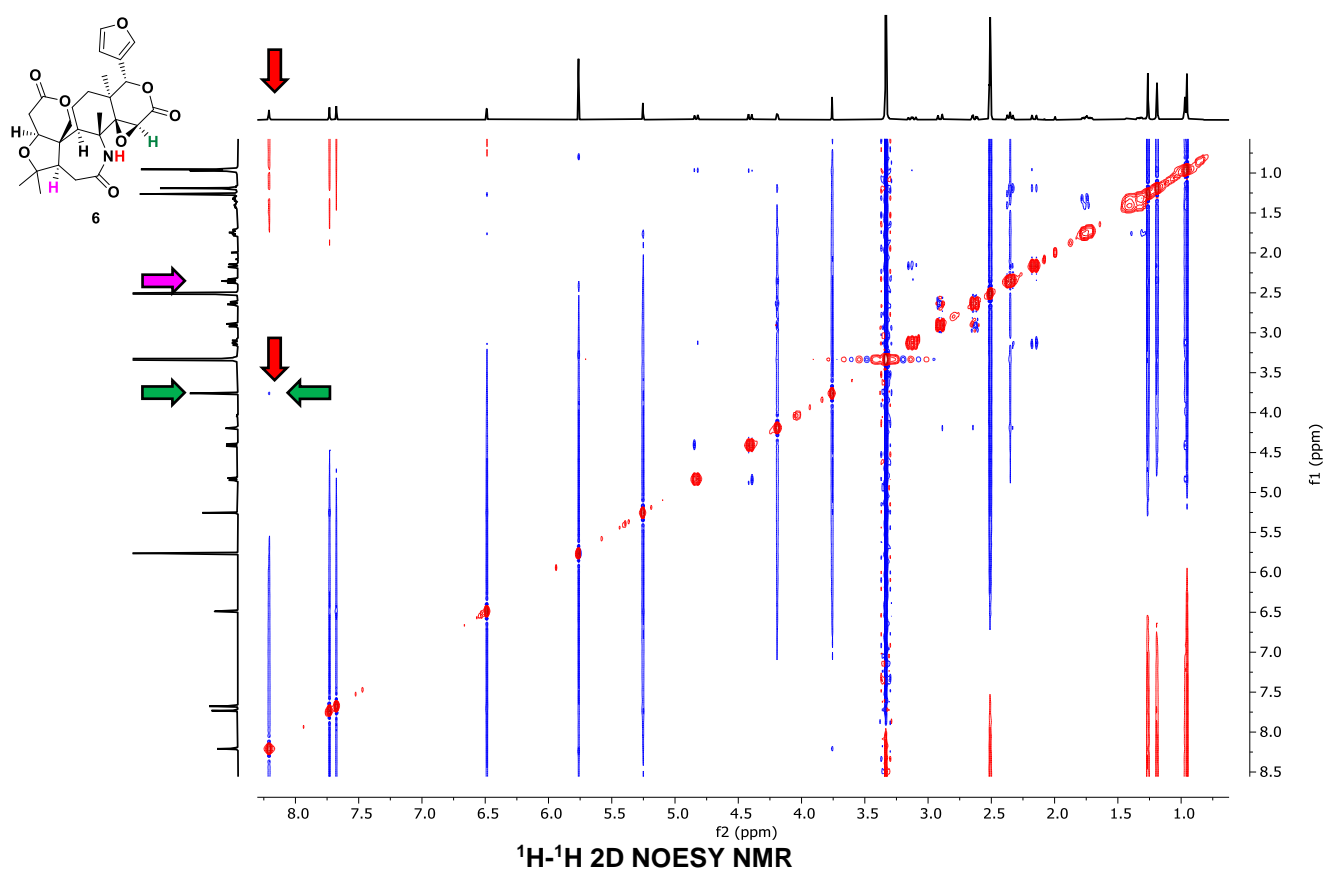

## SUPPORTING INFORMATION

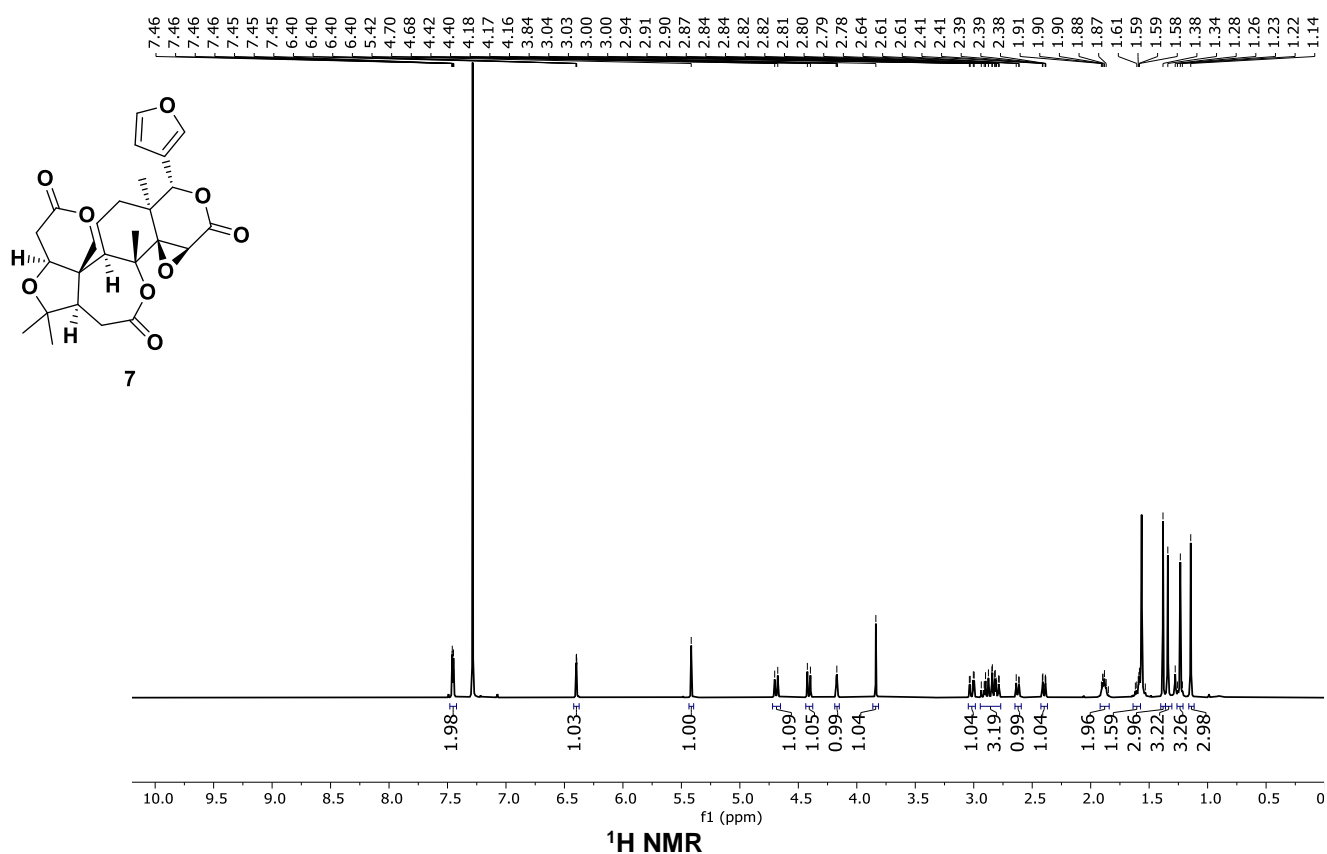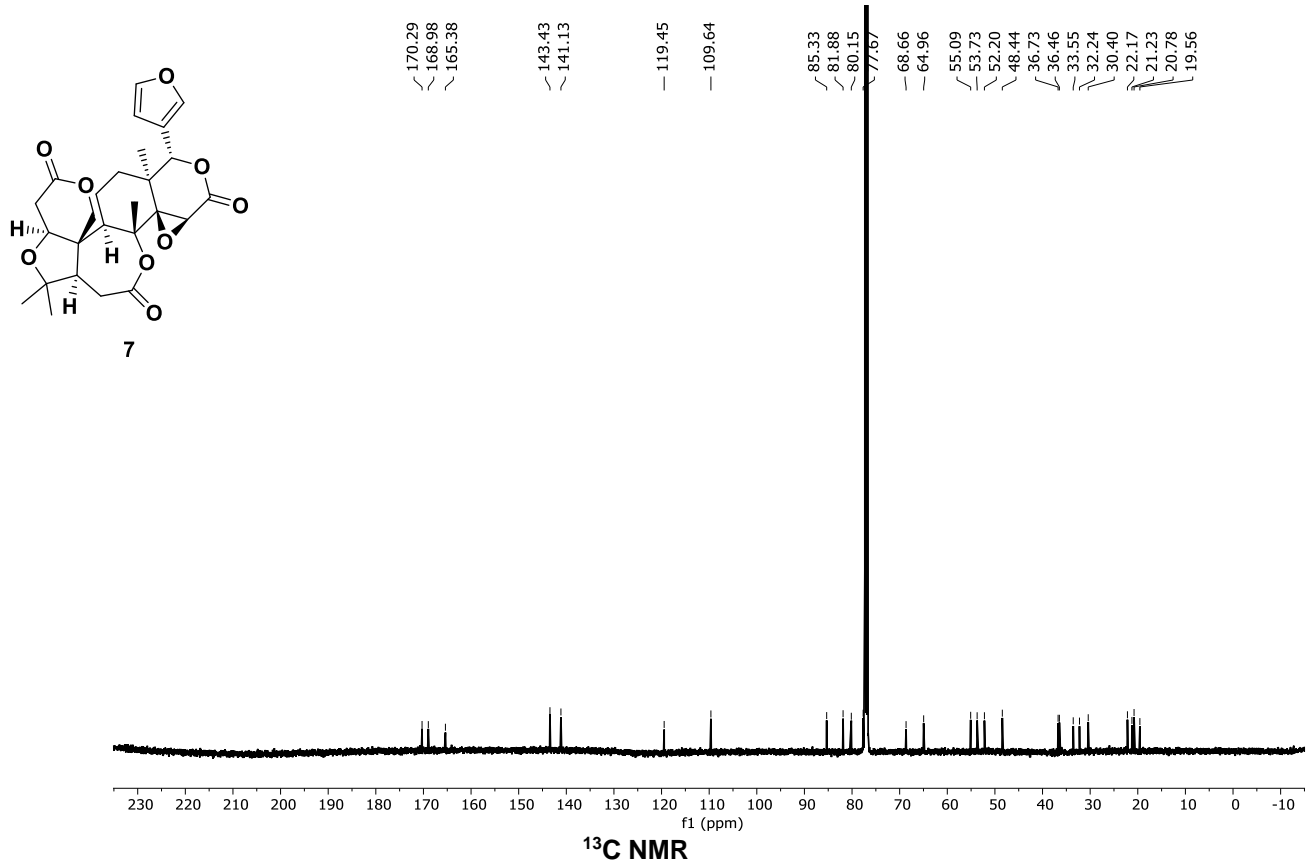

## SUPPORTING INFORMATION

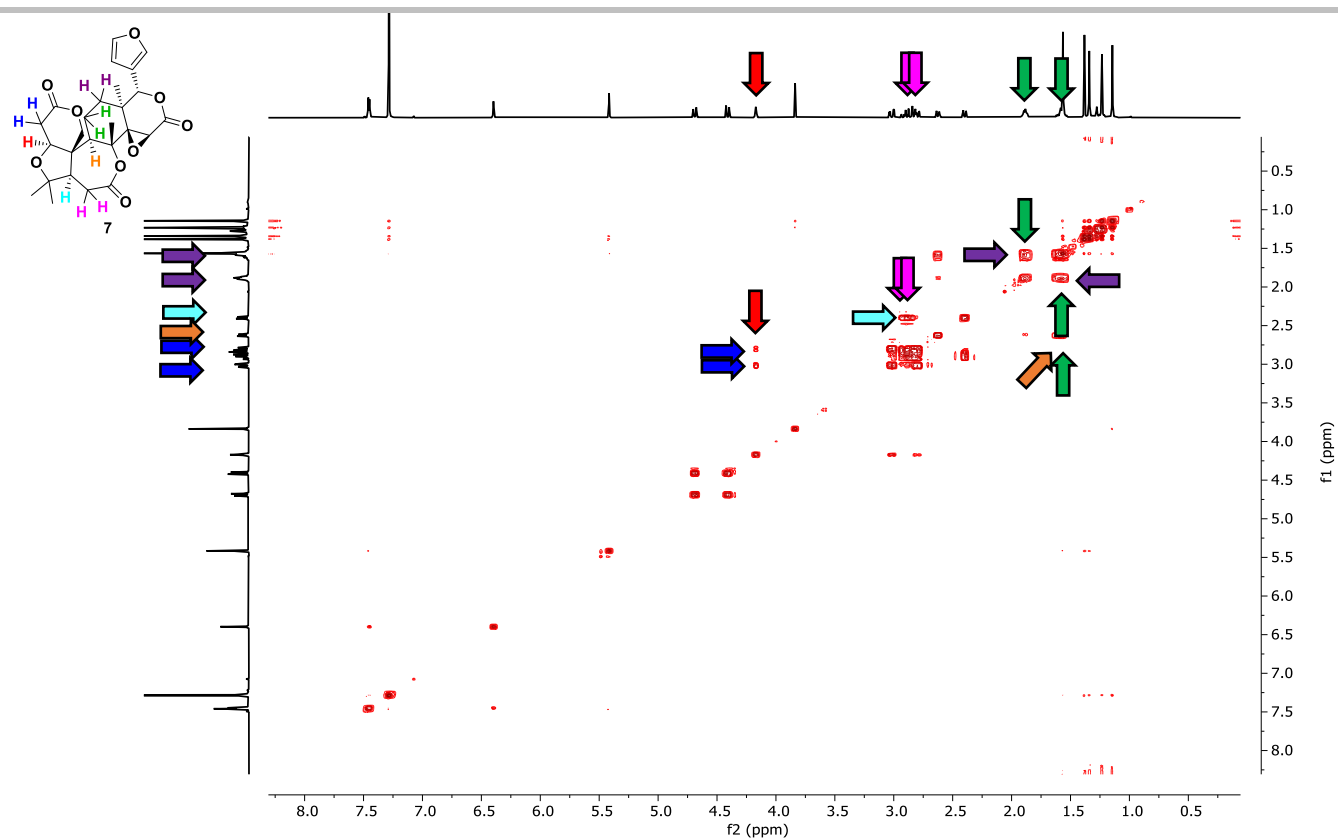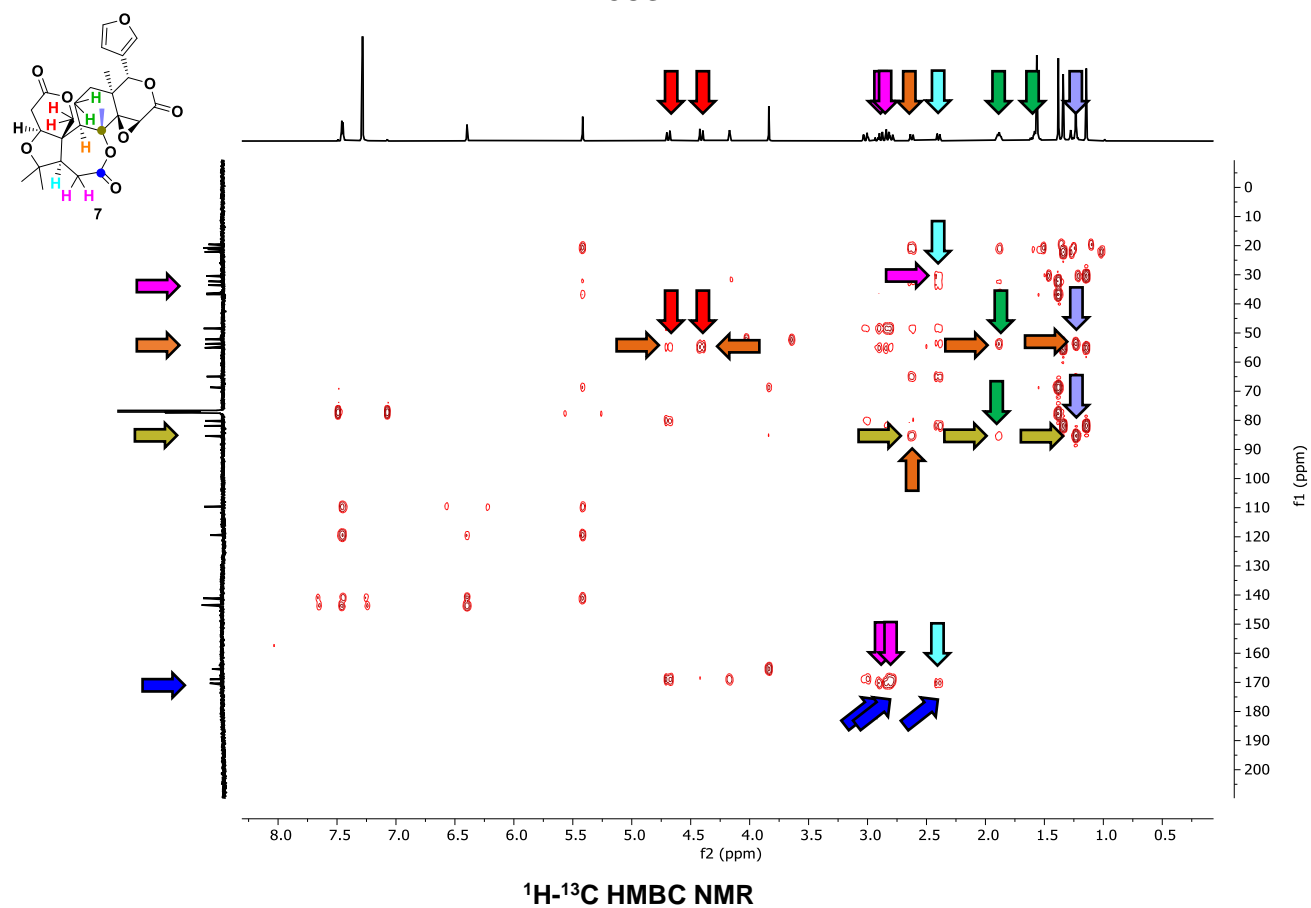

## SUPPORTING INFORMATION

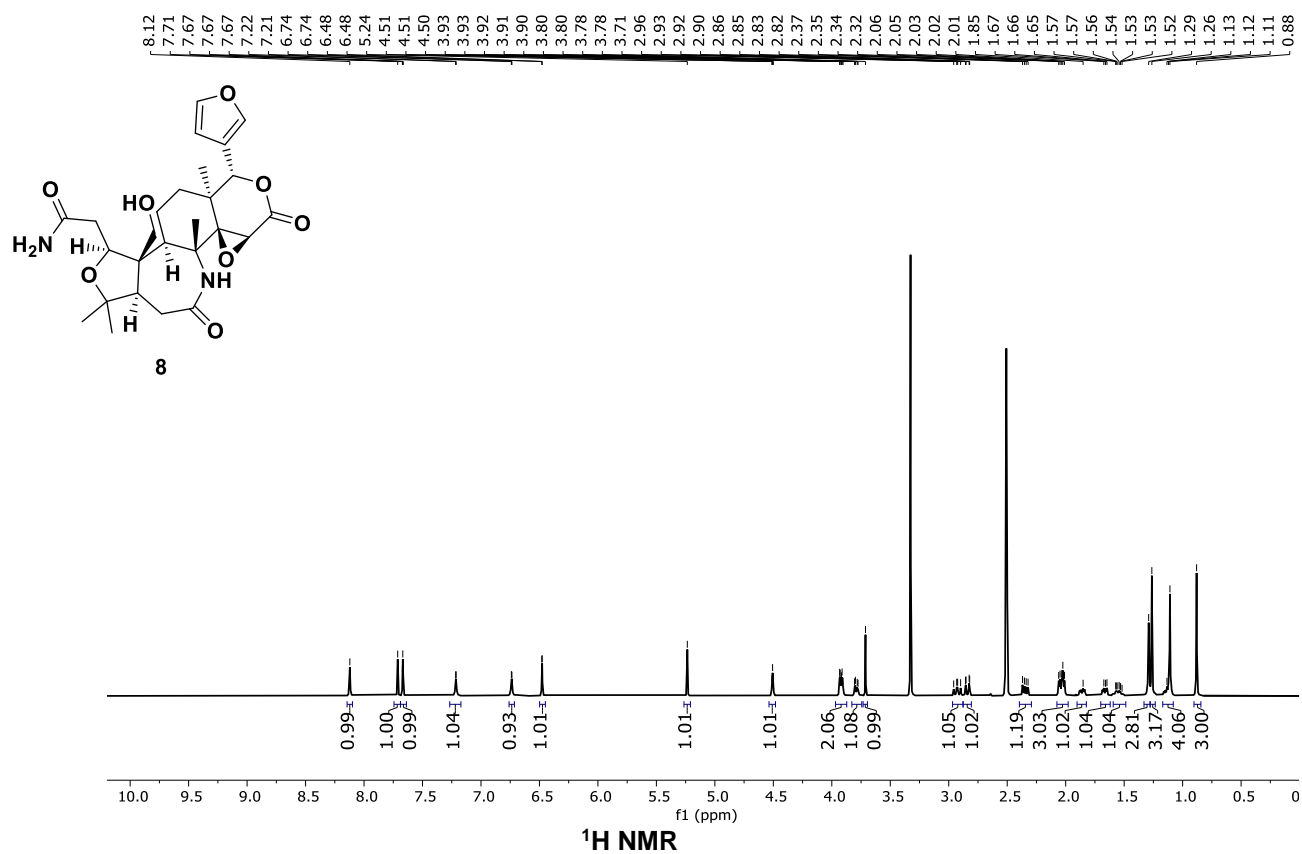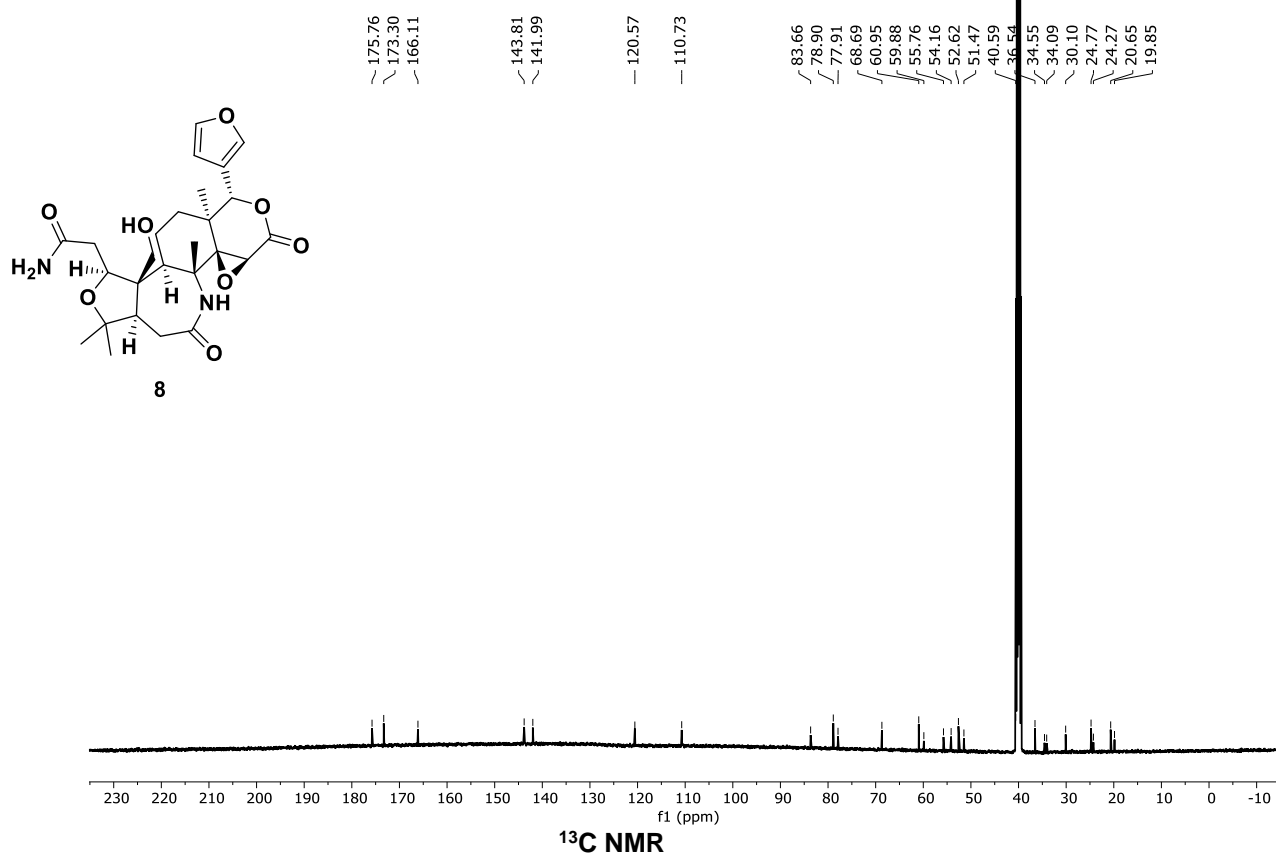

## SUPPORTING INFORMATION

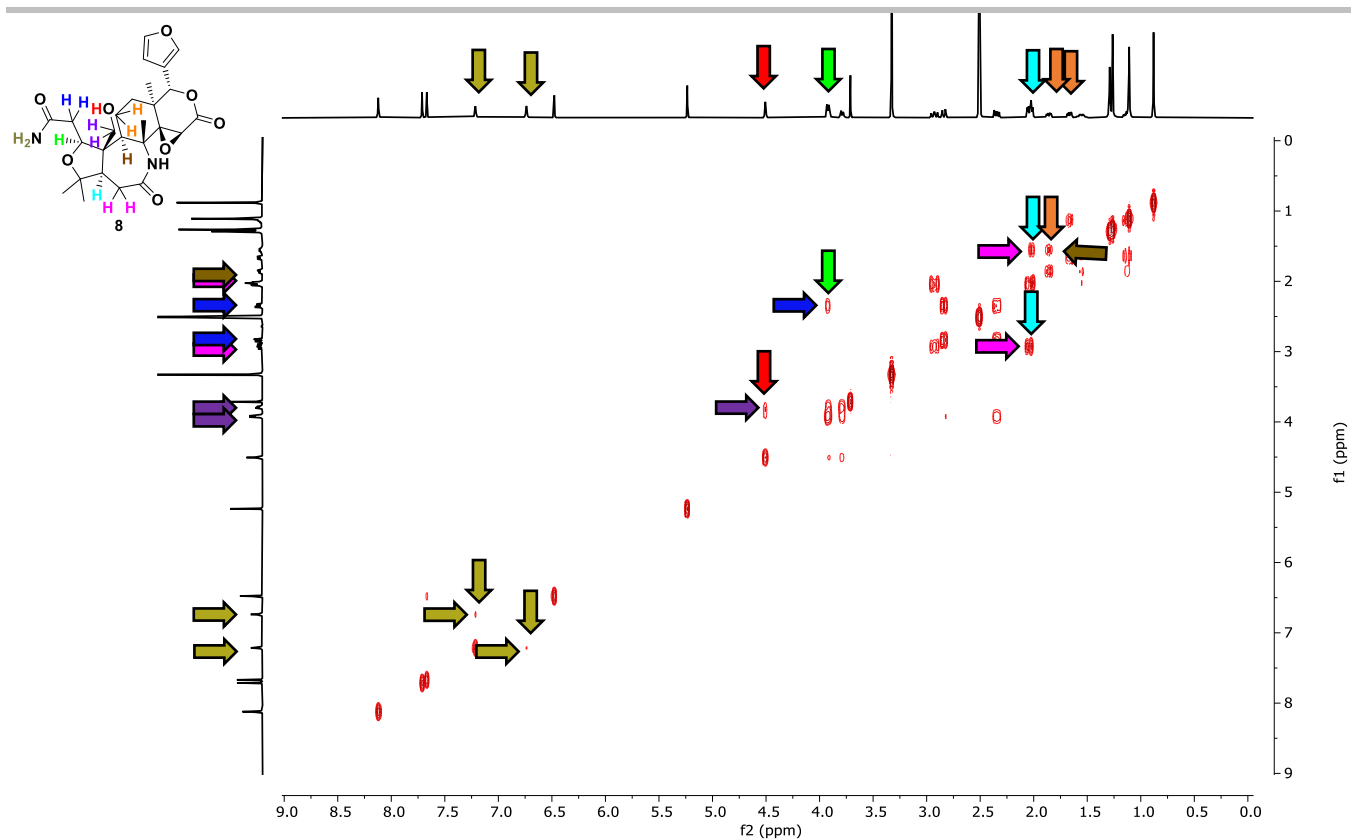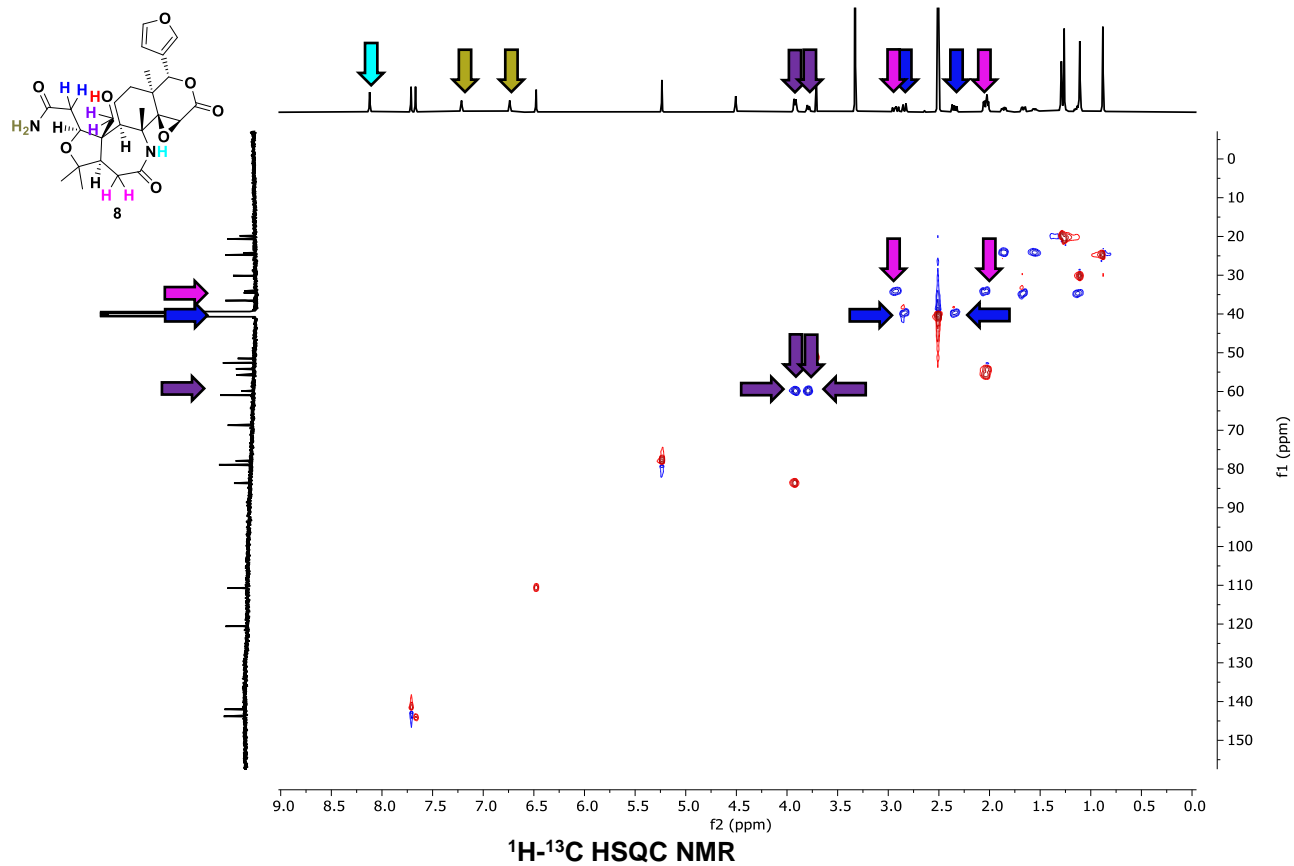

## SUPPORTING INFORMATION

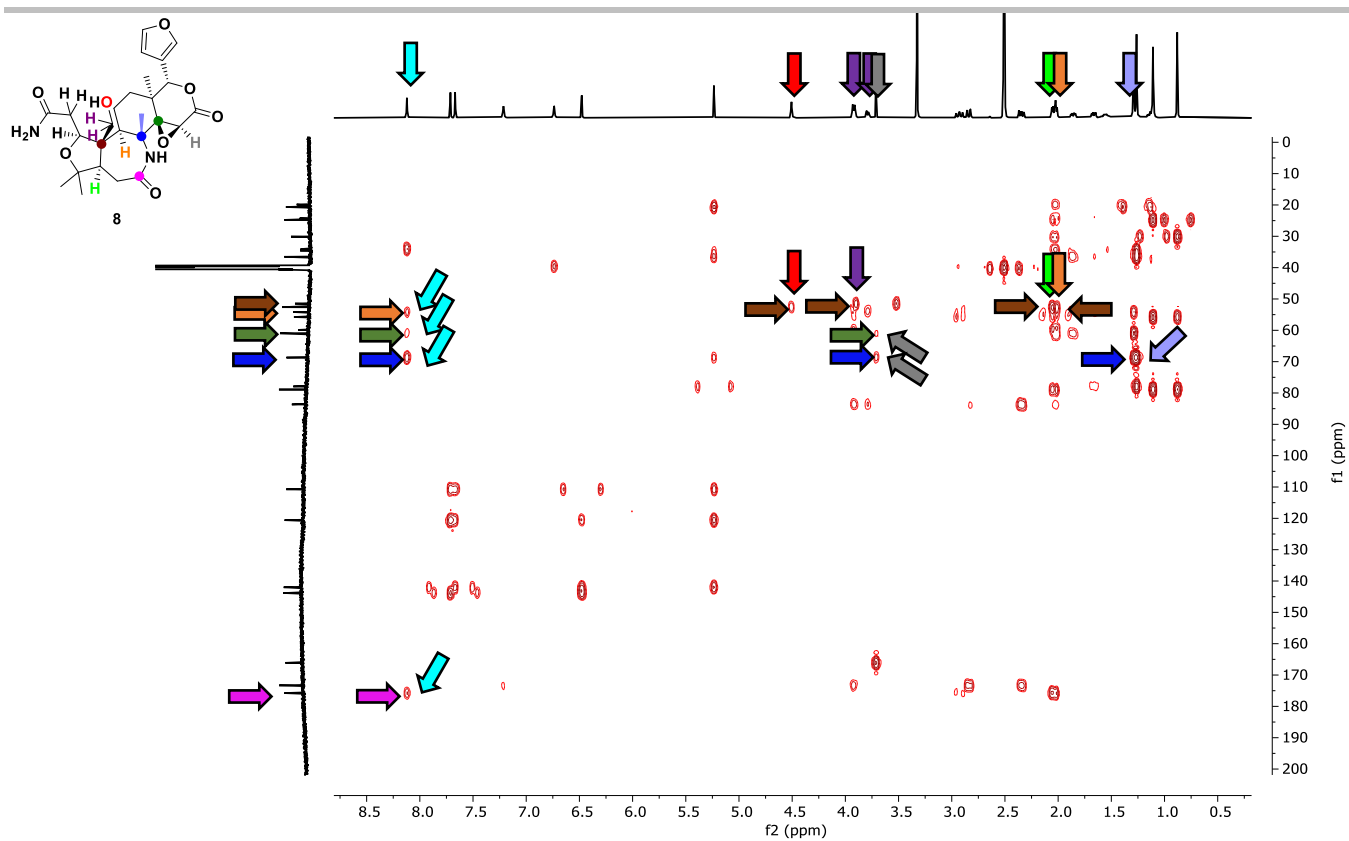 $^1\text{H}$ - $^{13}\text{C}$  HMBC NMR



## SUPPORTING INFORMATION

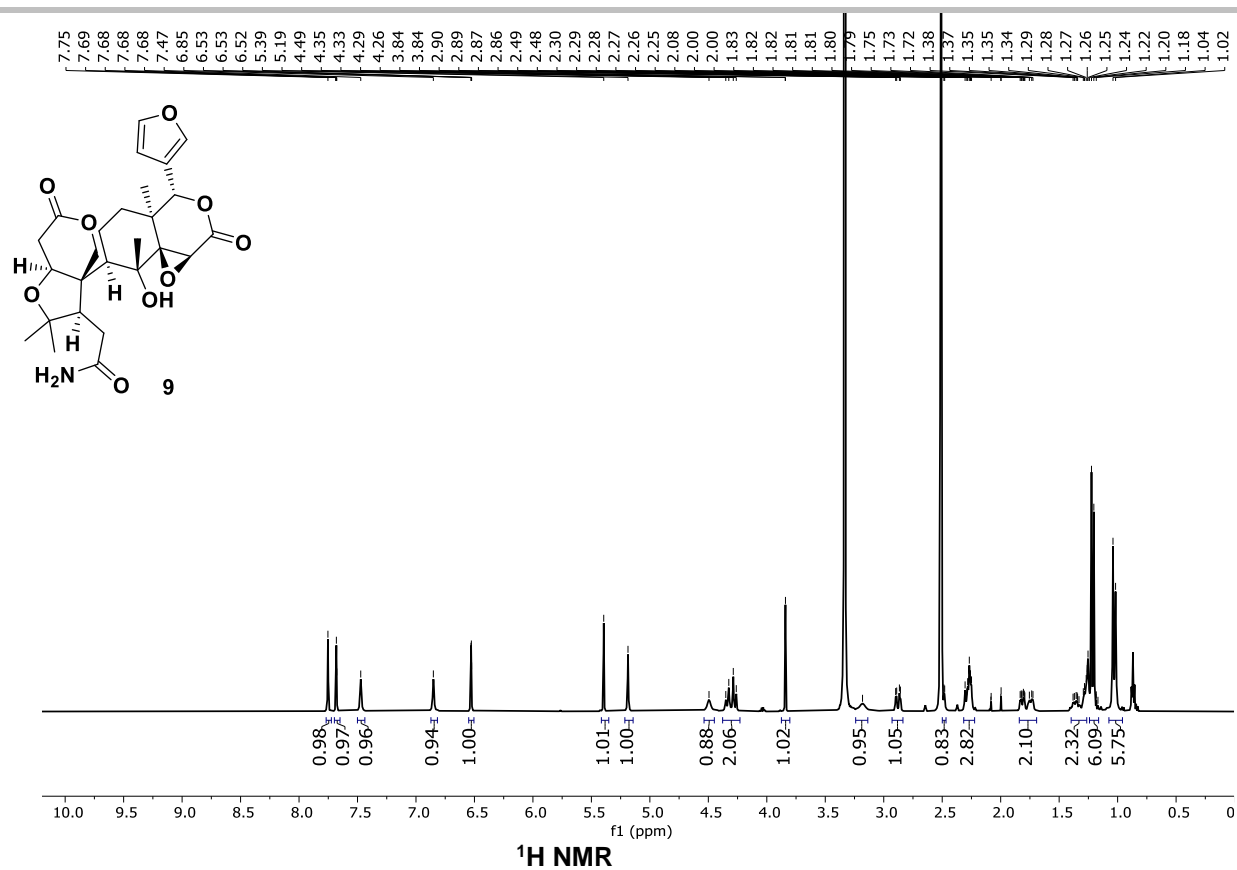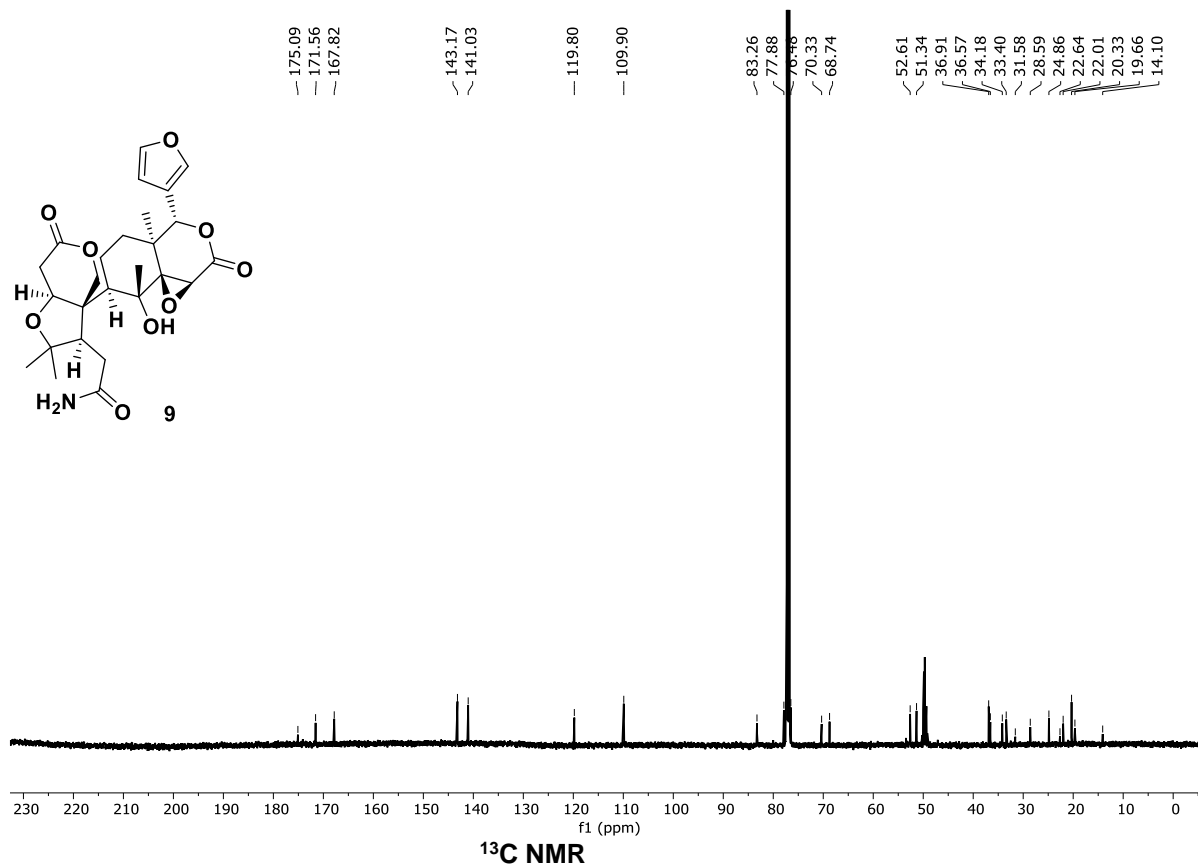

## SUPPORTING INFORMATION

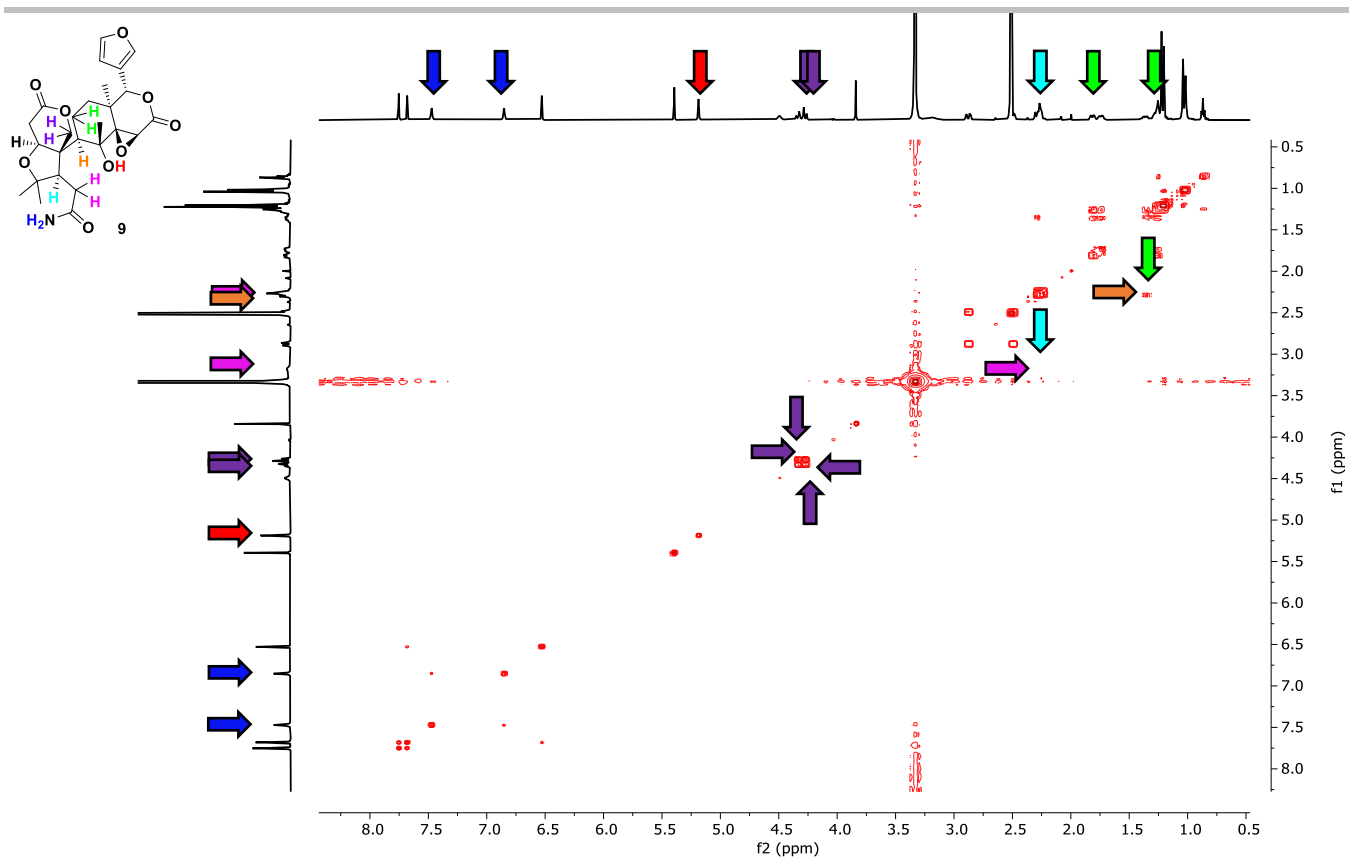

## SUPPORTING INFORMATION

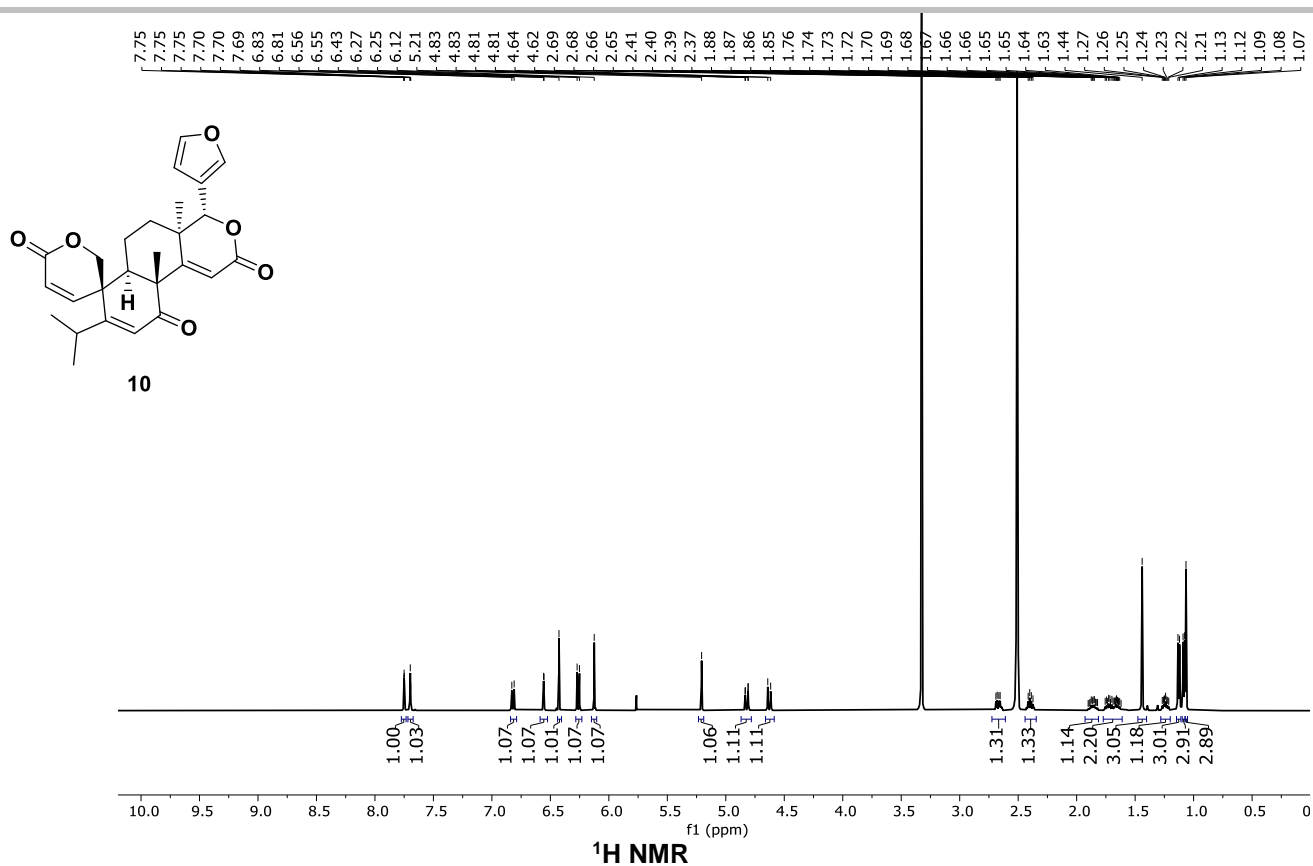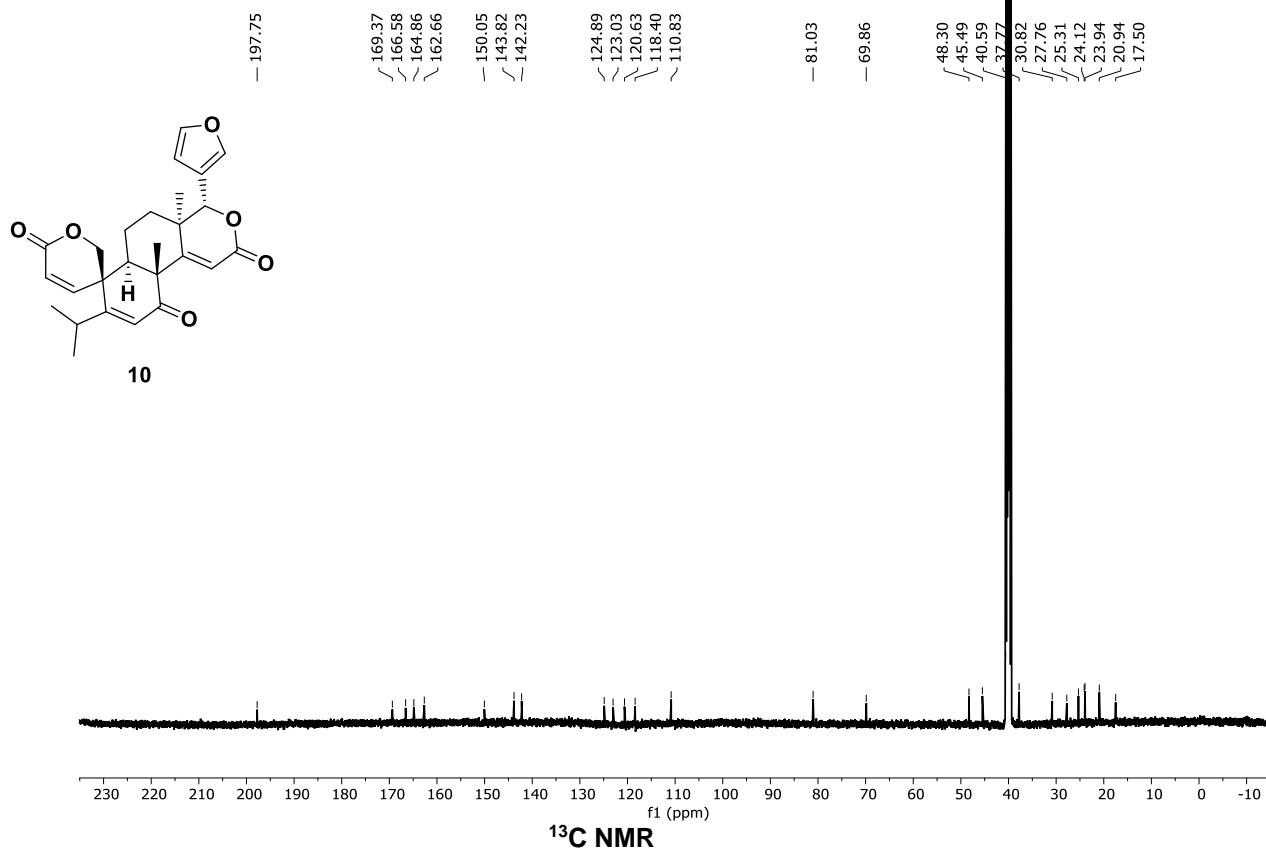

## SUPPORTING INFORMATION

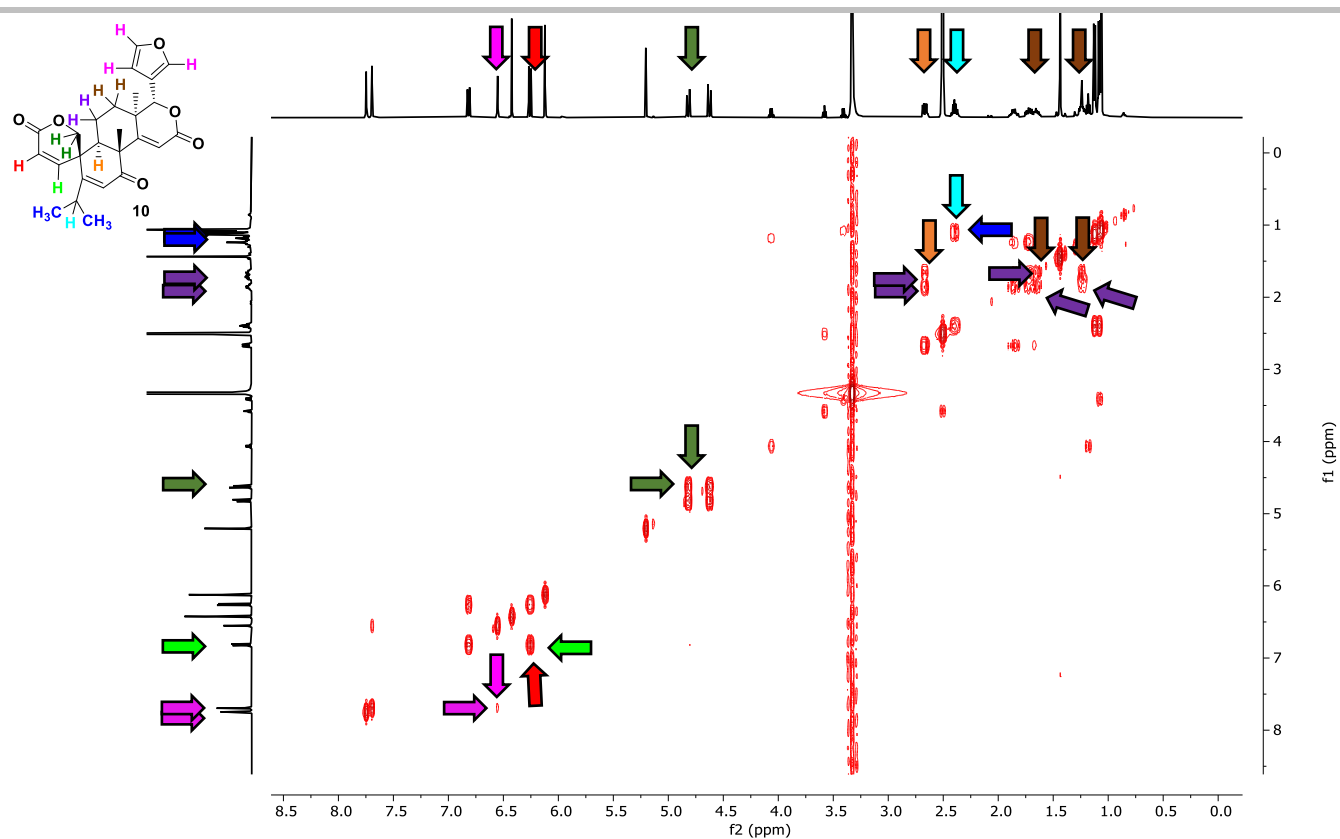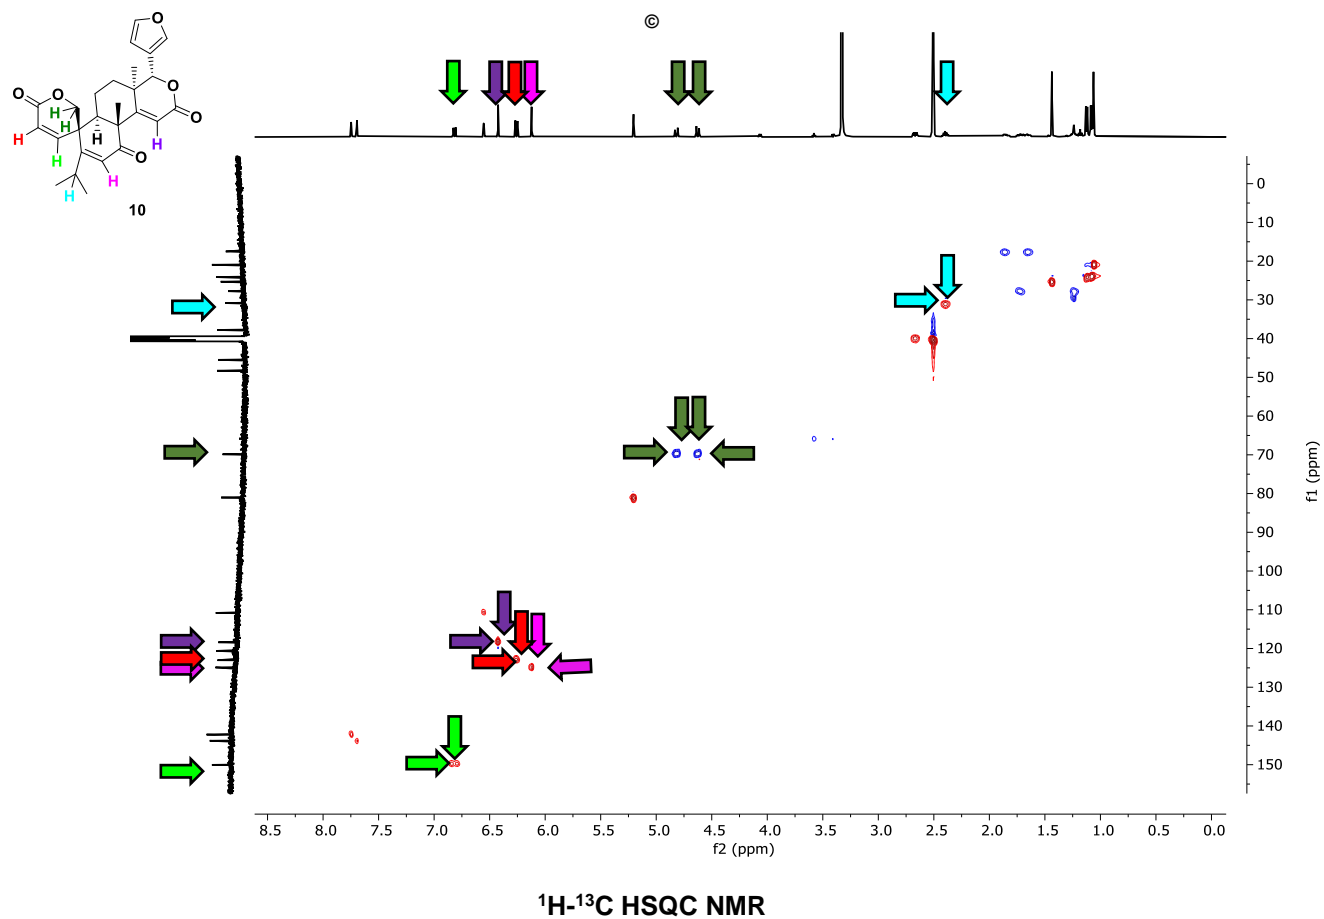

## SUPPORTING INFORMATION

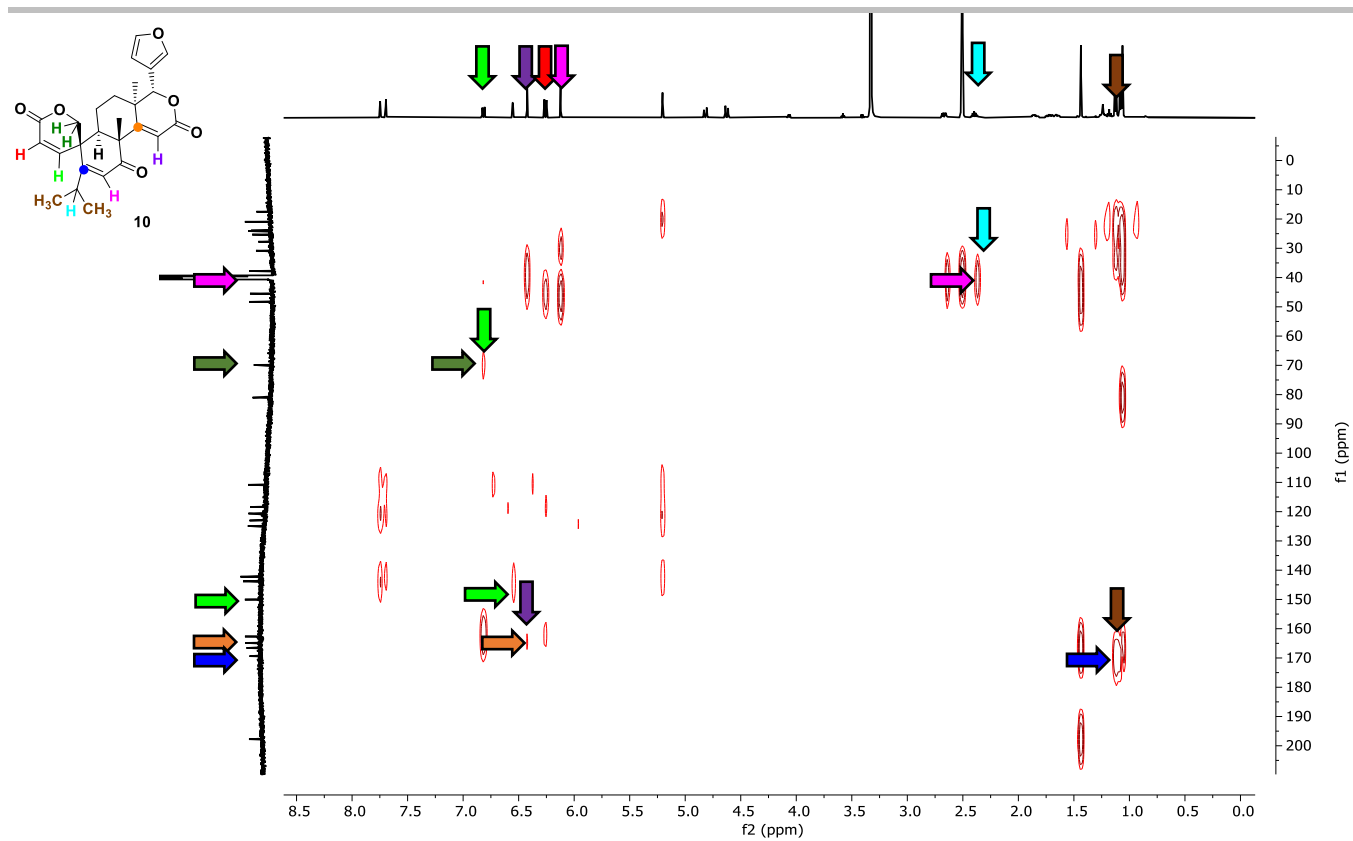 $^1\text{H}$ - $^{13}\text{C}$  HMBC NMR

## SUPPORTING INFORMATION

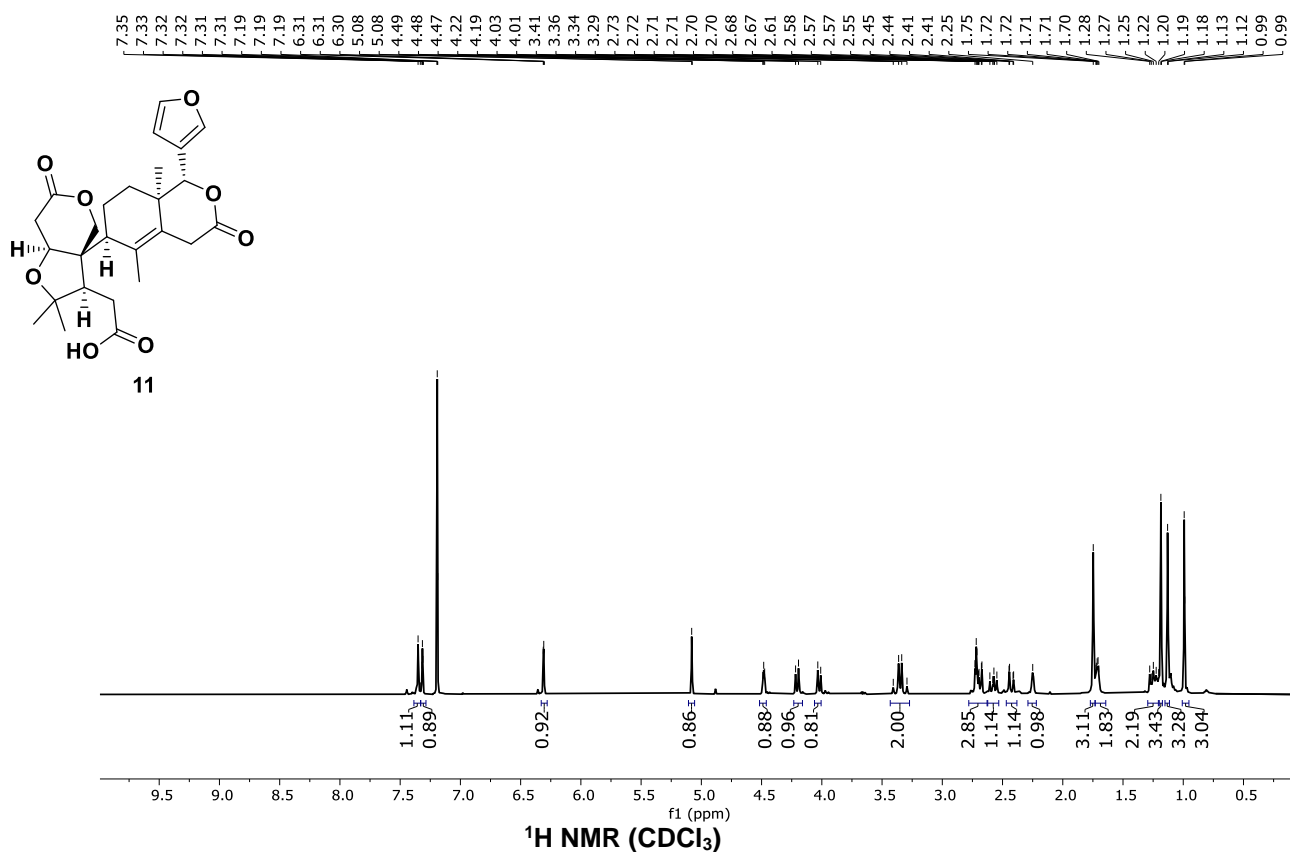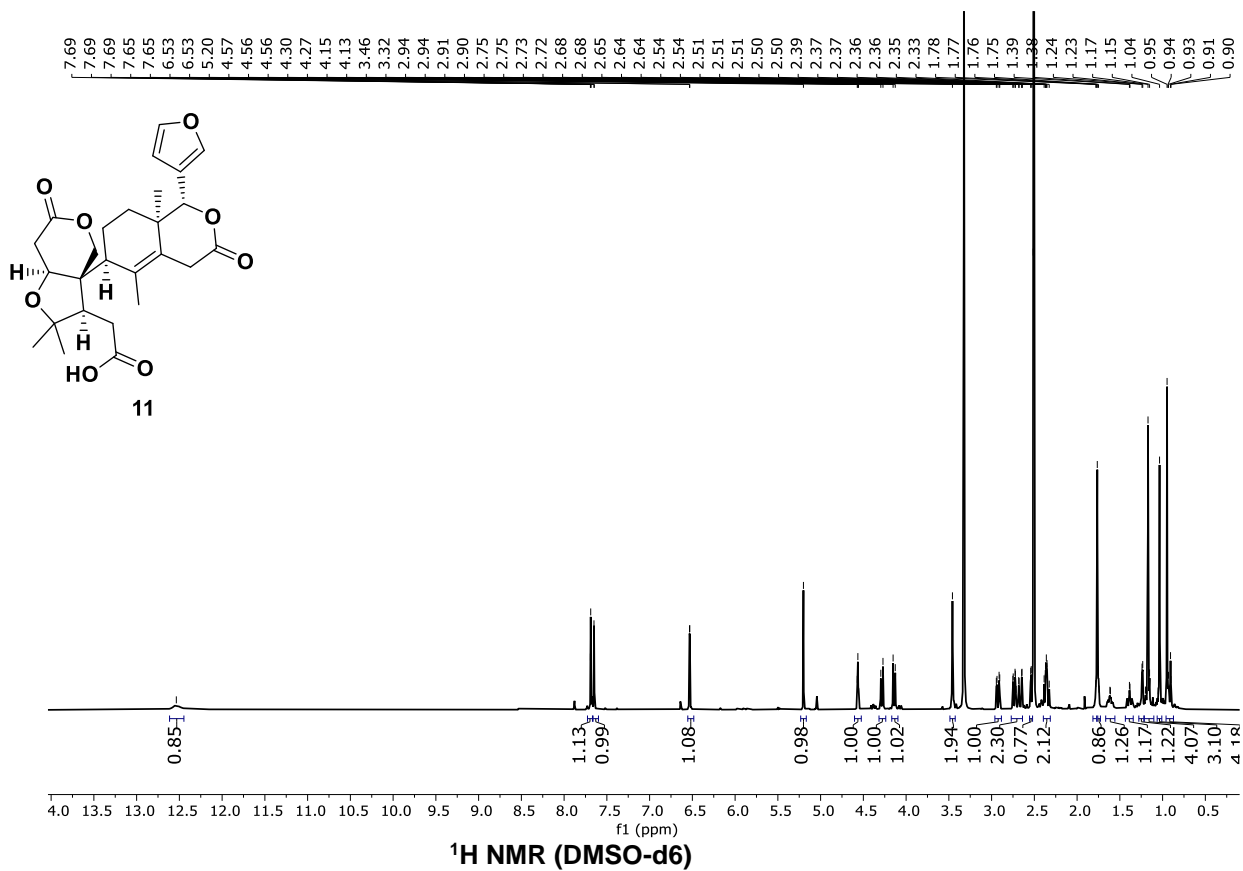

## SUPPORTING INFORMATION

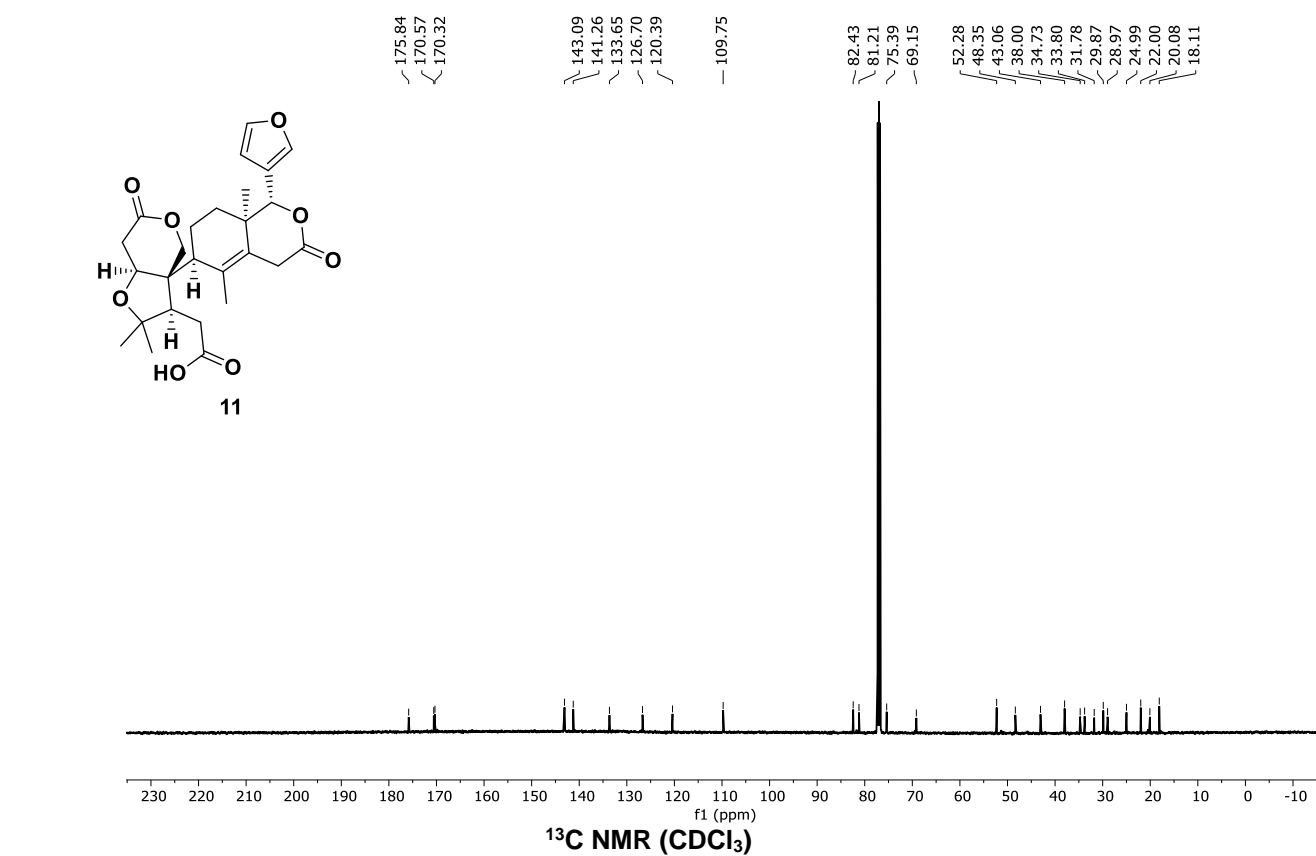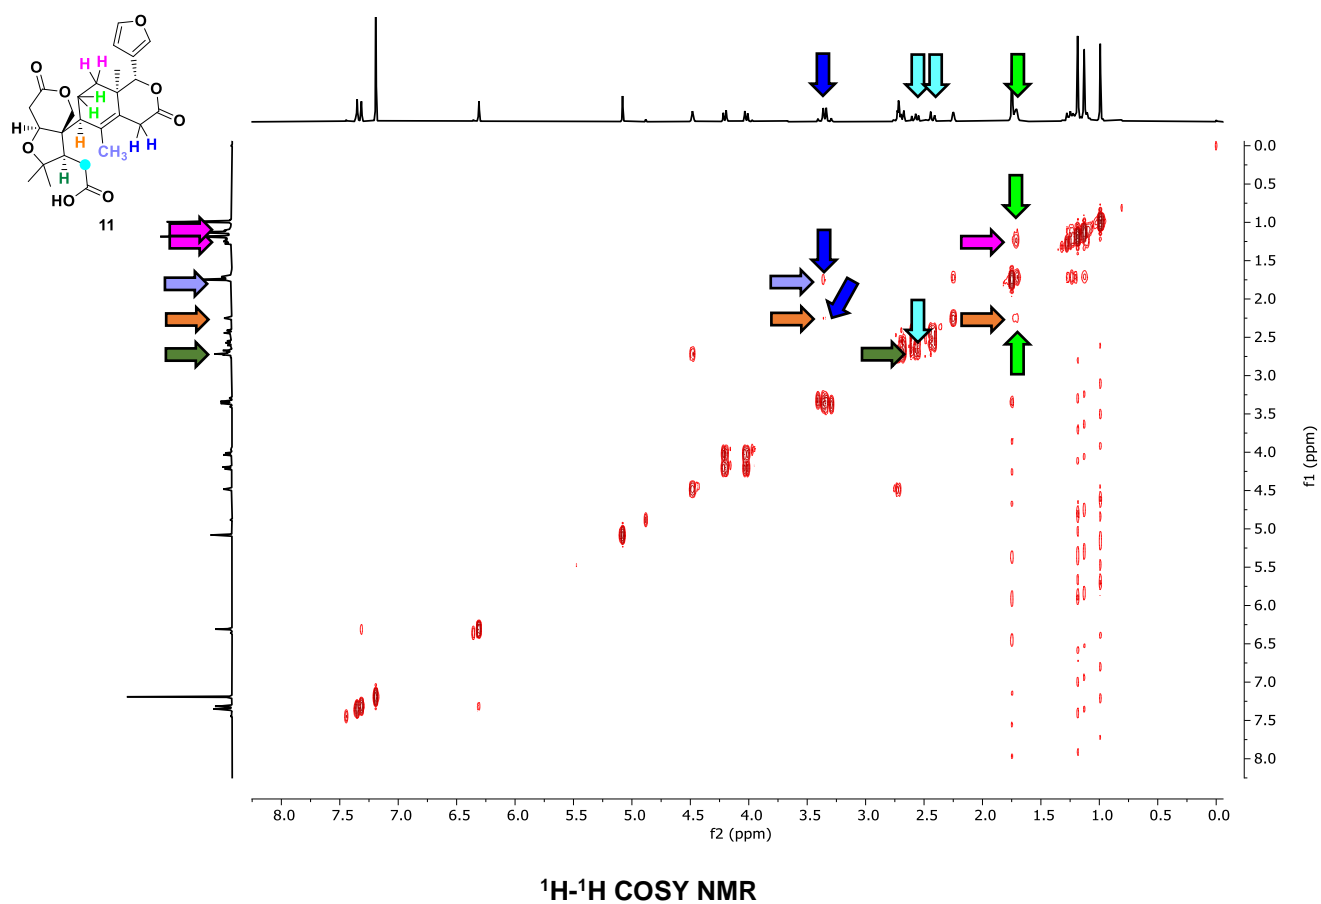

## SUPPORTING INFORMATION

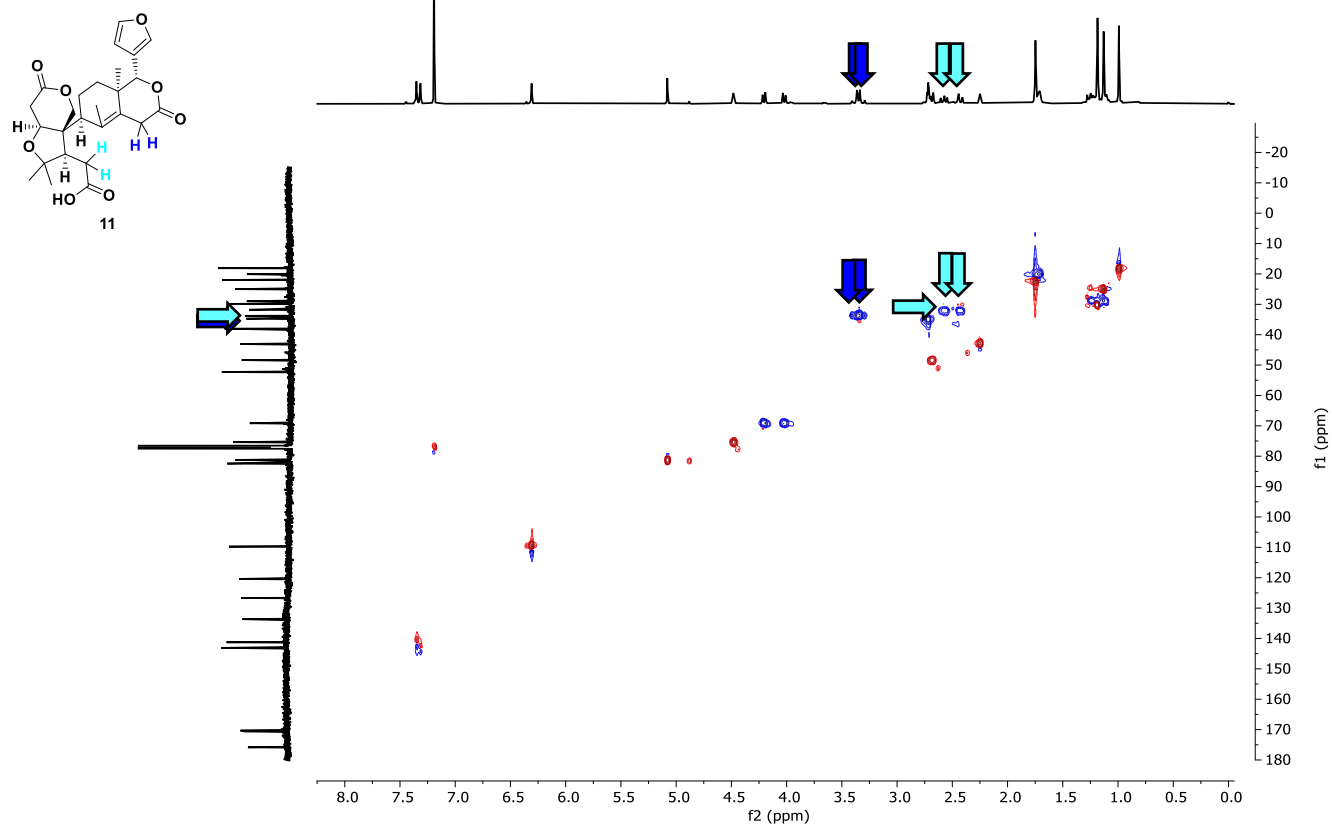 $^1\text{H}$ - $^{13}\text{C}$  HSQC NMR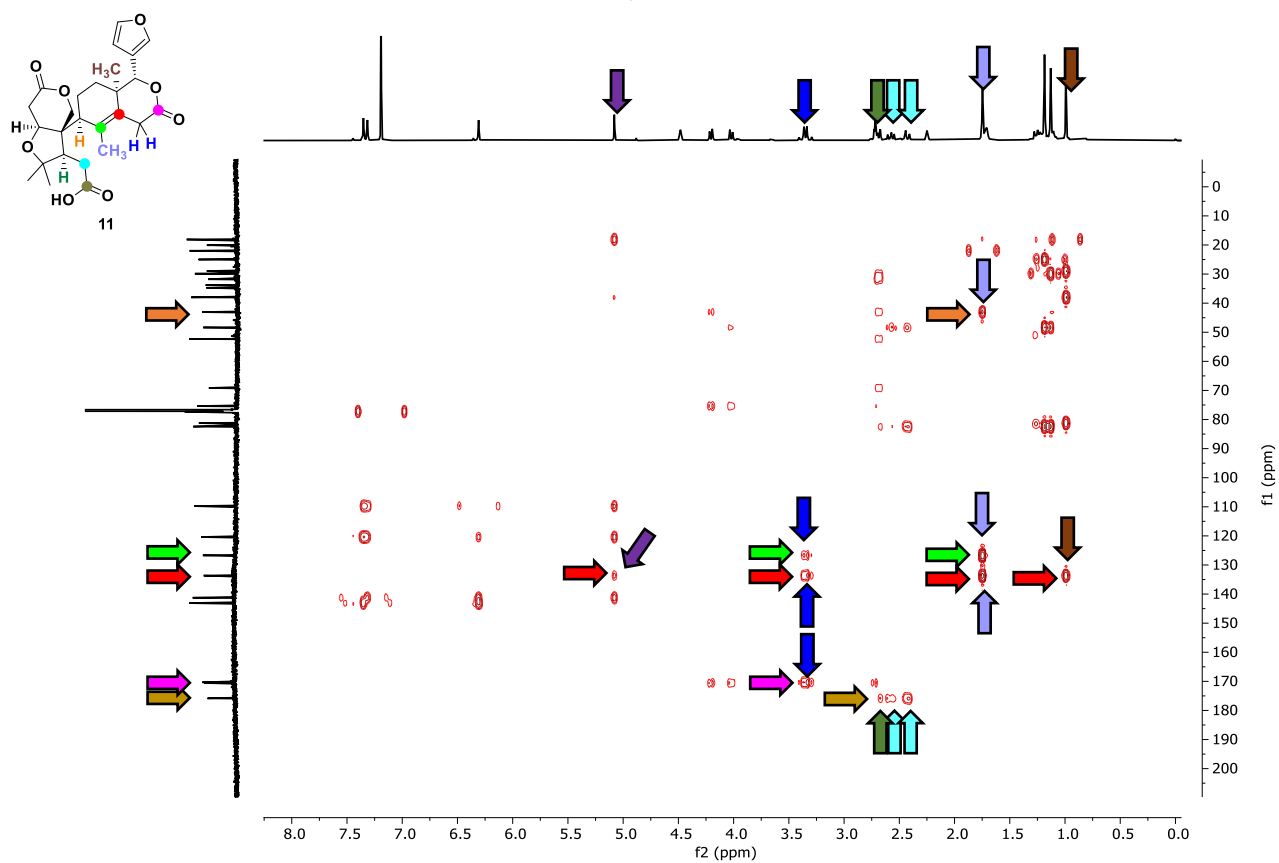 $^1\text{H}$ - $^{13}\text{C}$  HMBC NMR



## SUPPORTING INFORMATION

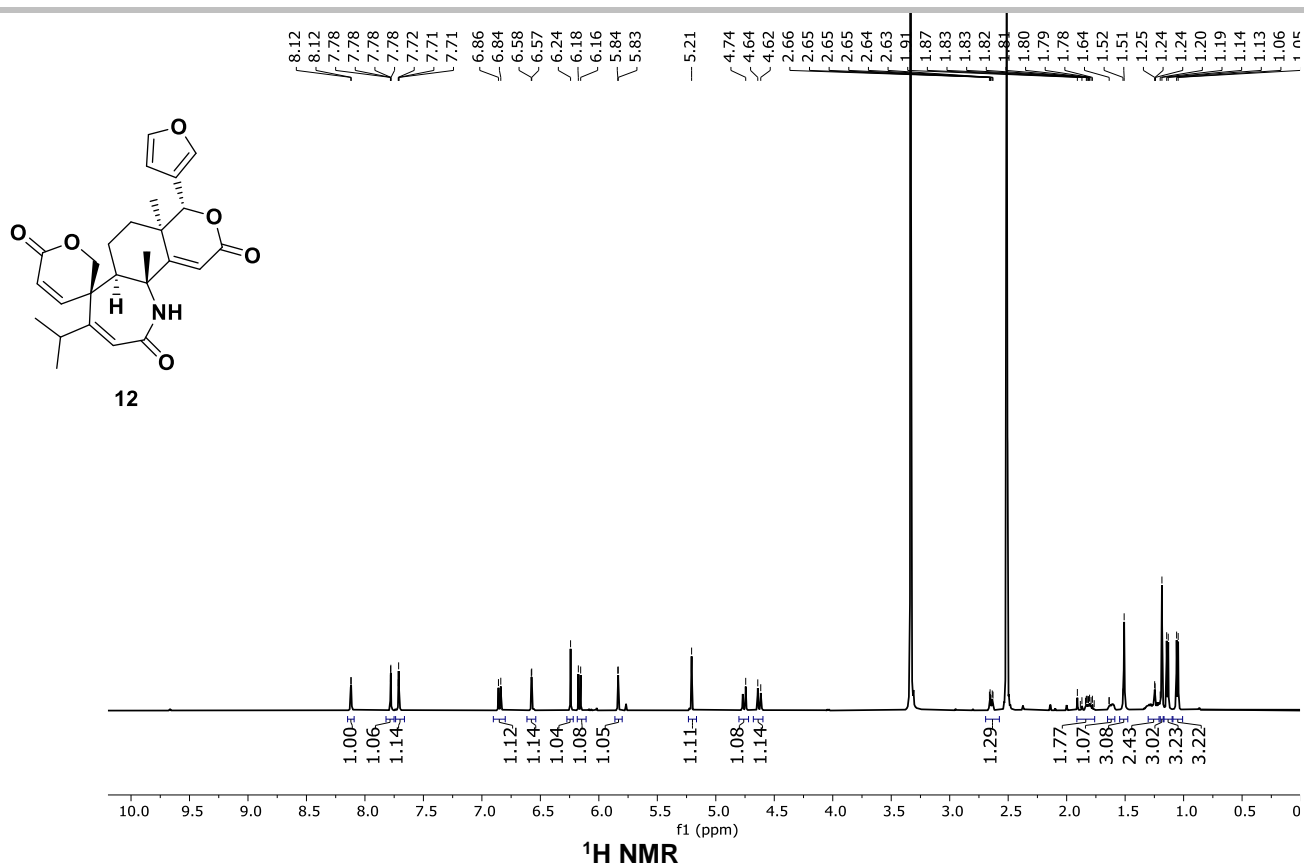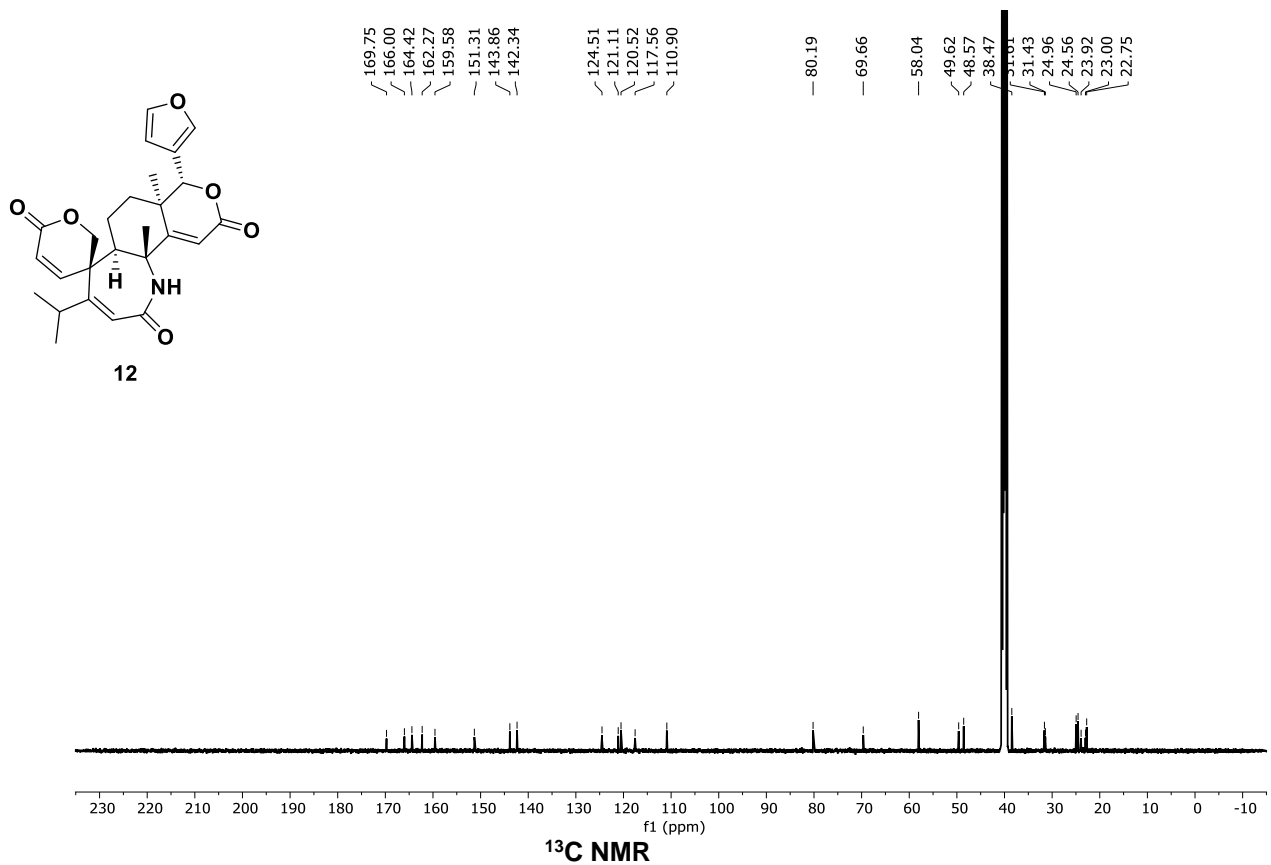

## SUPPORTING INFORMATION

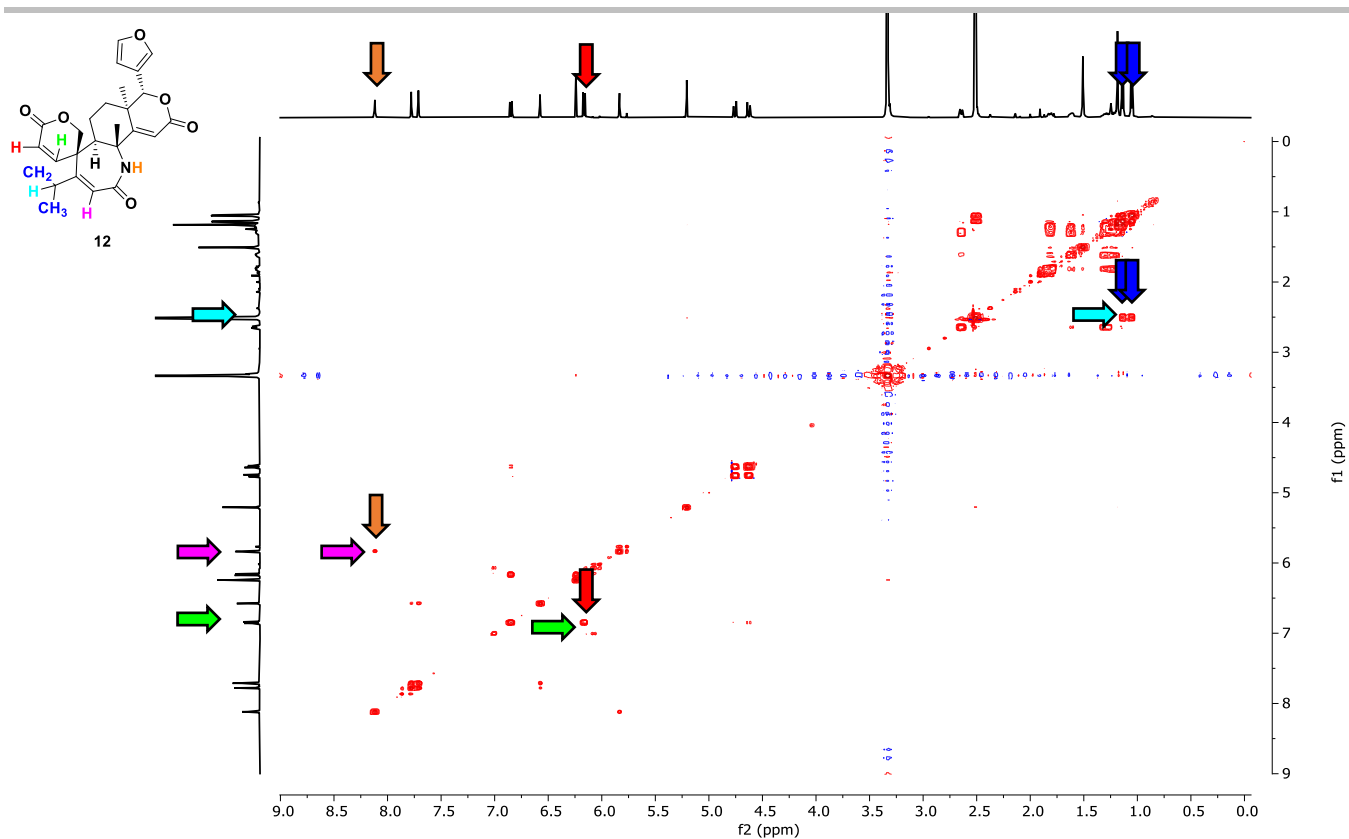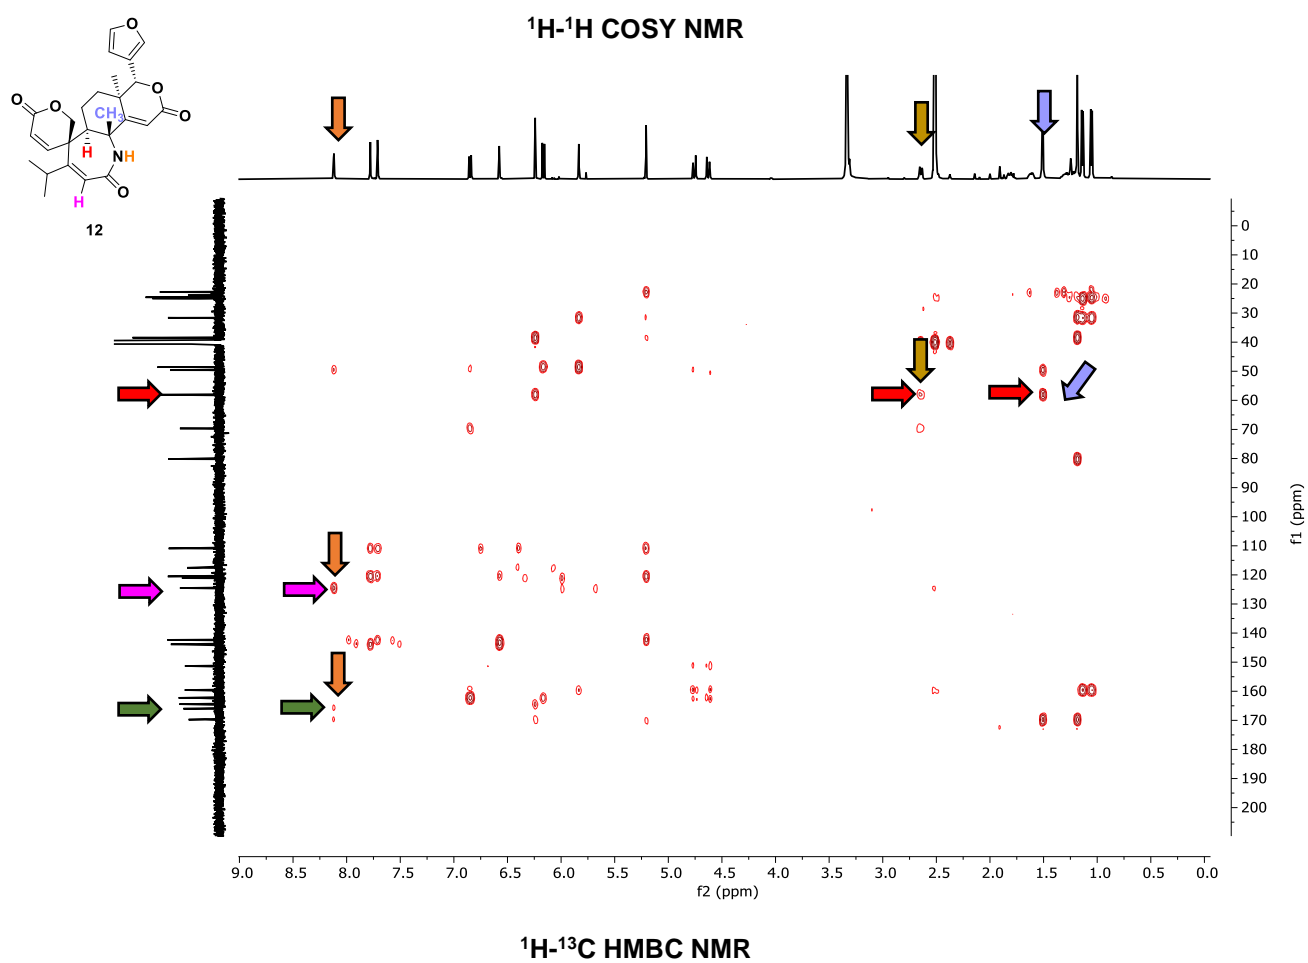

## SUPPORTING INFORMATION

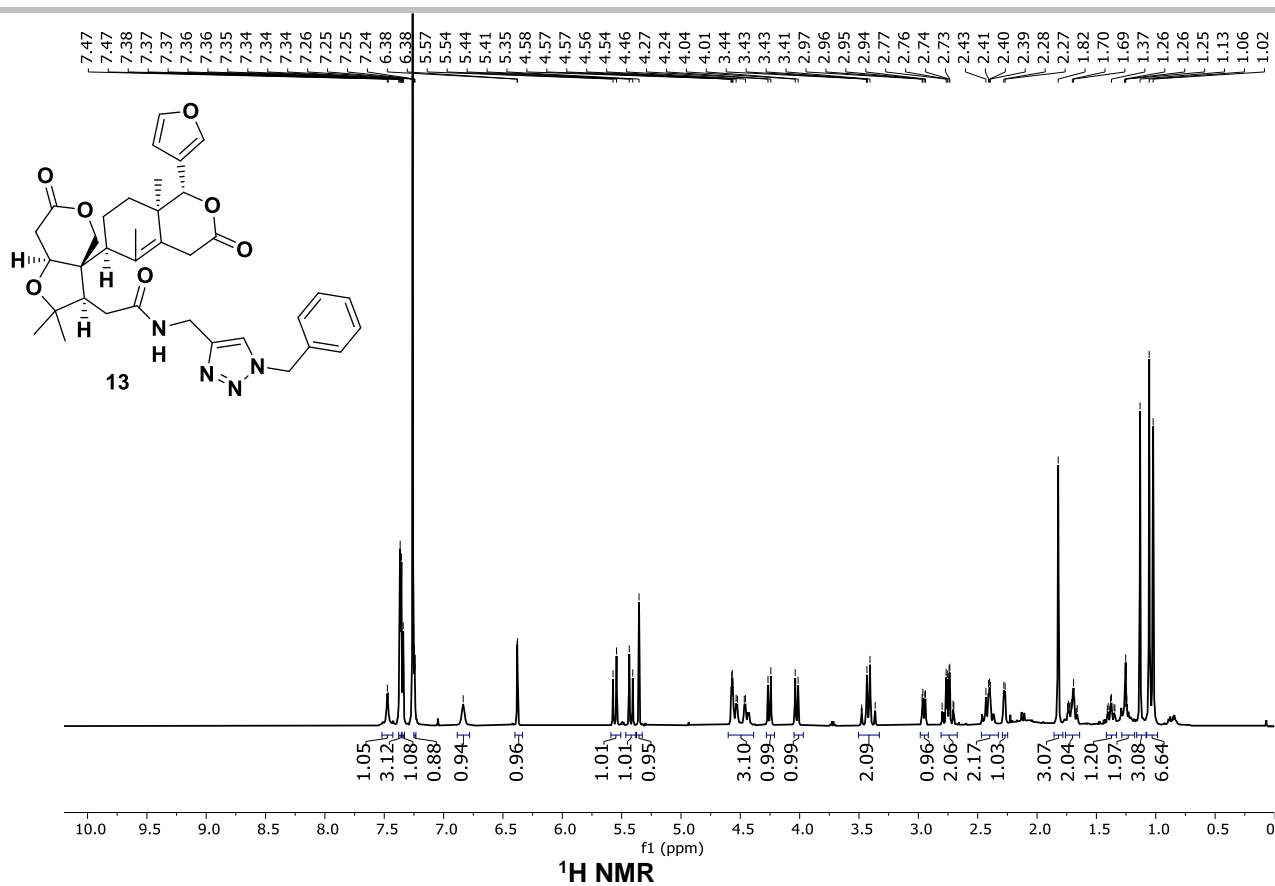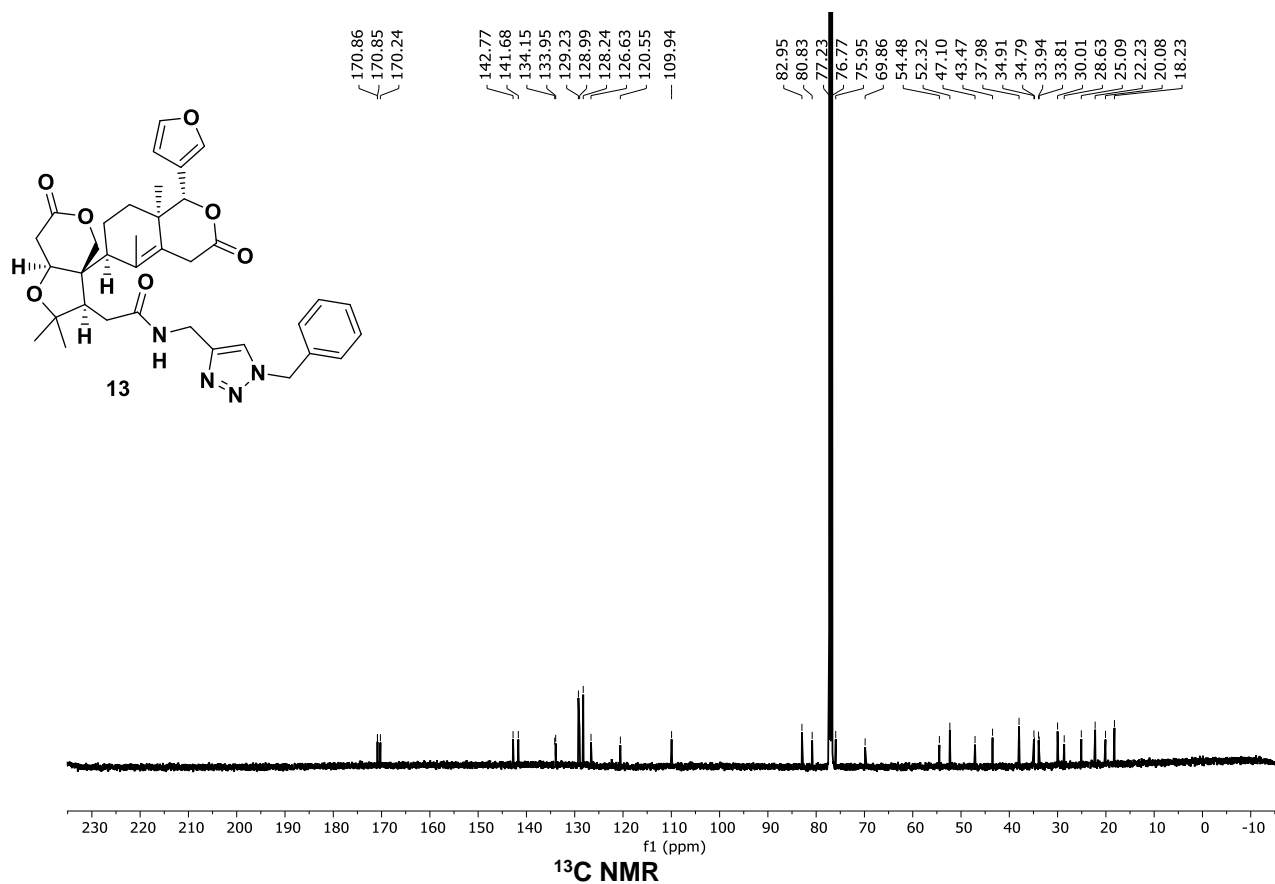

## SUPPORTING INFORMATION

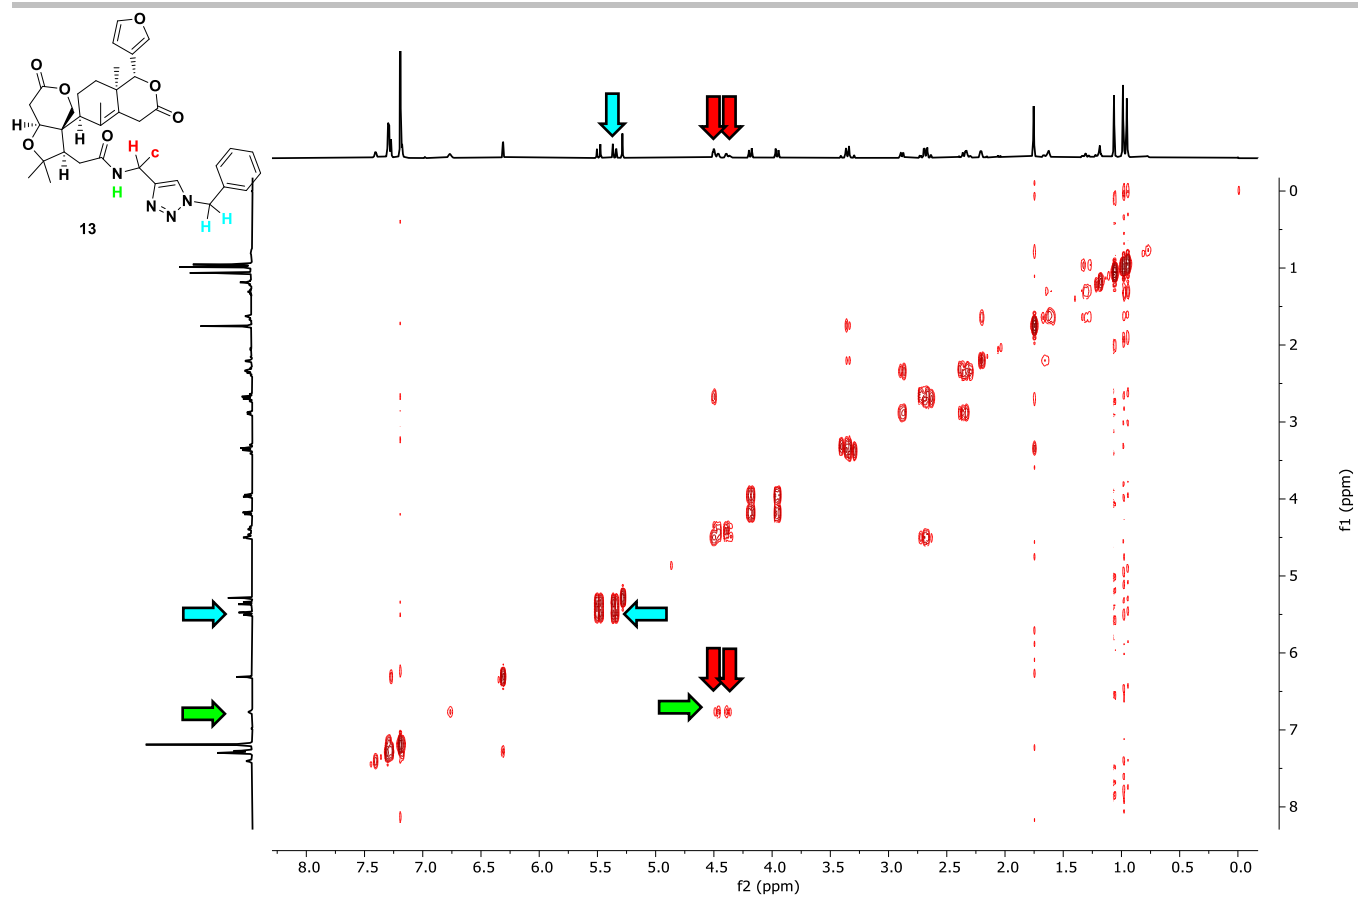

## SUPPORTING INFORMATION

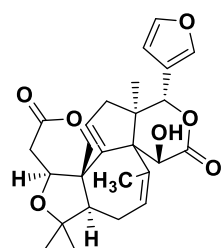

14

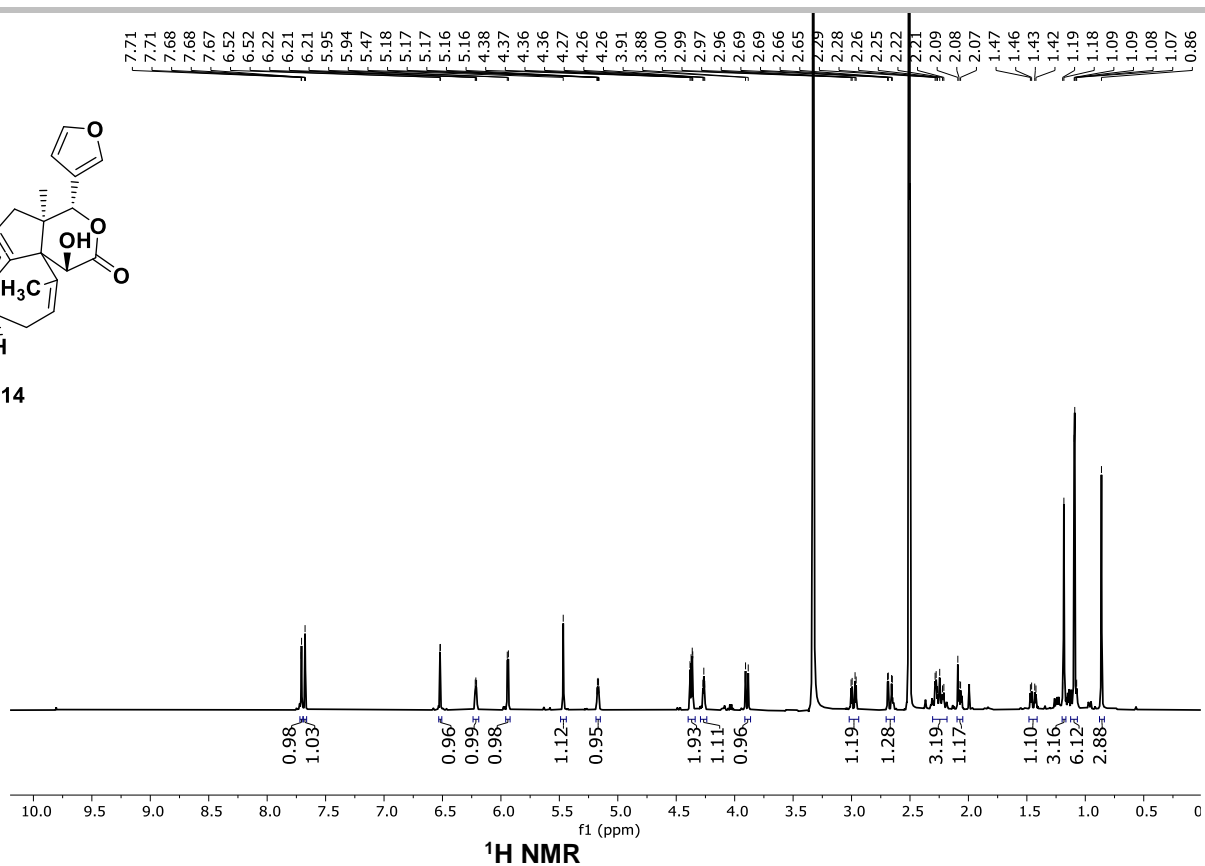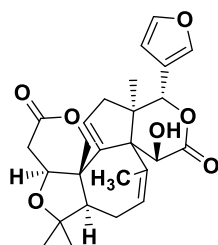

14

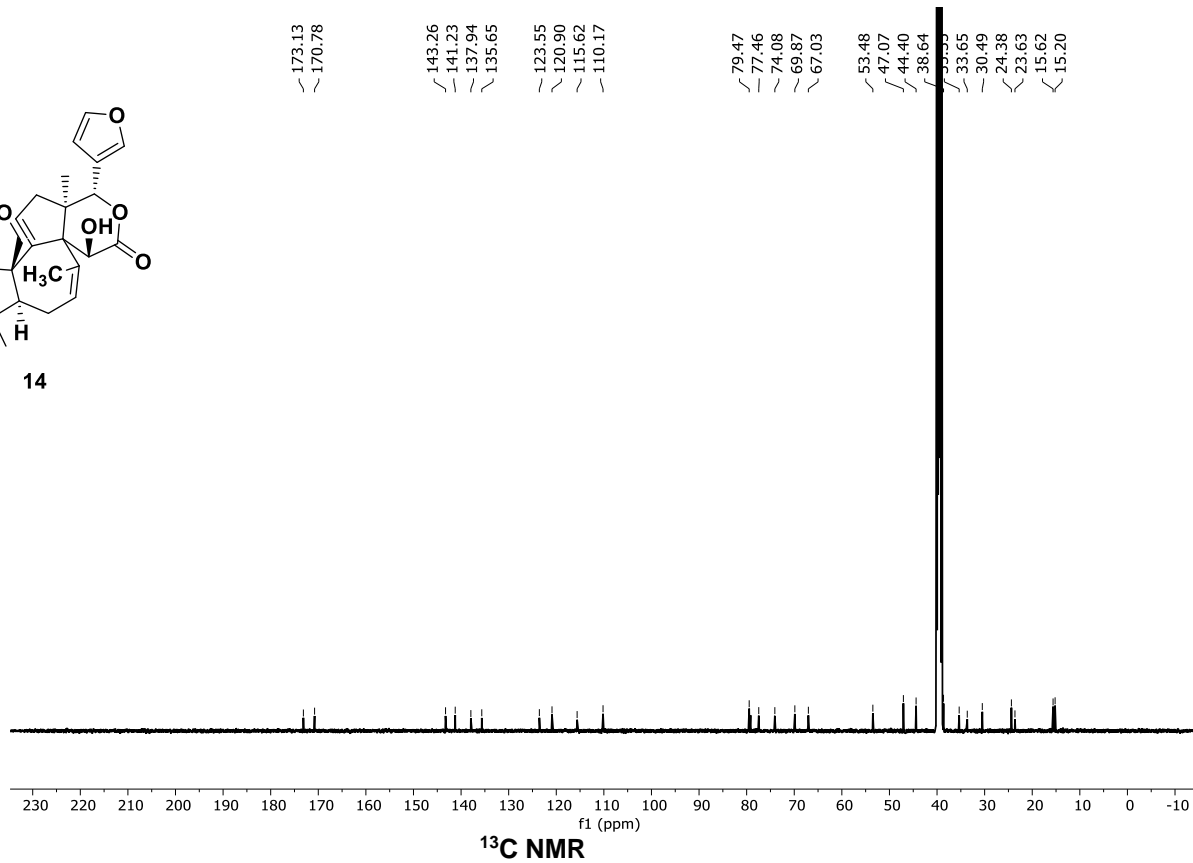

## SUPPORTING INFORMATION

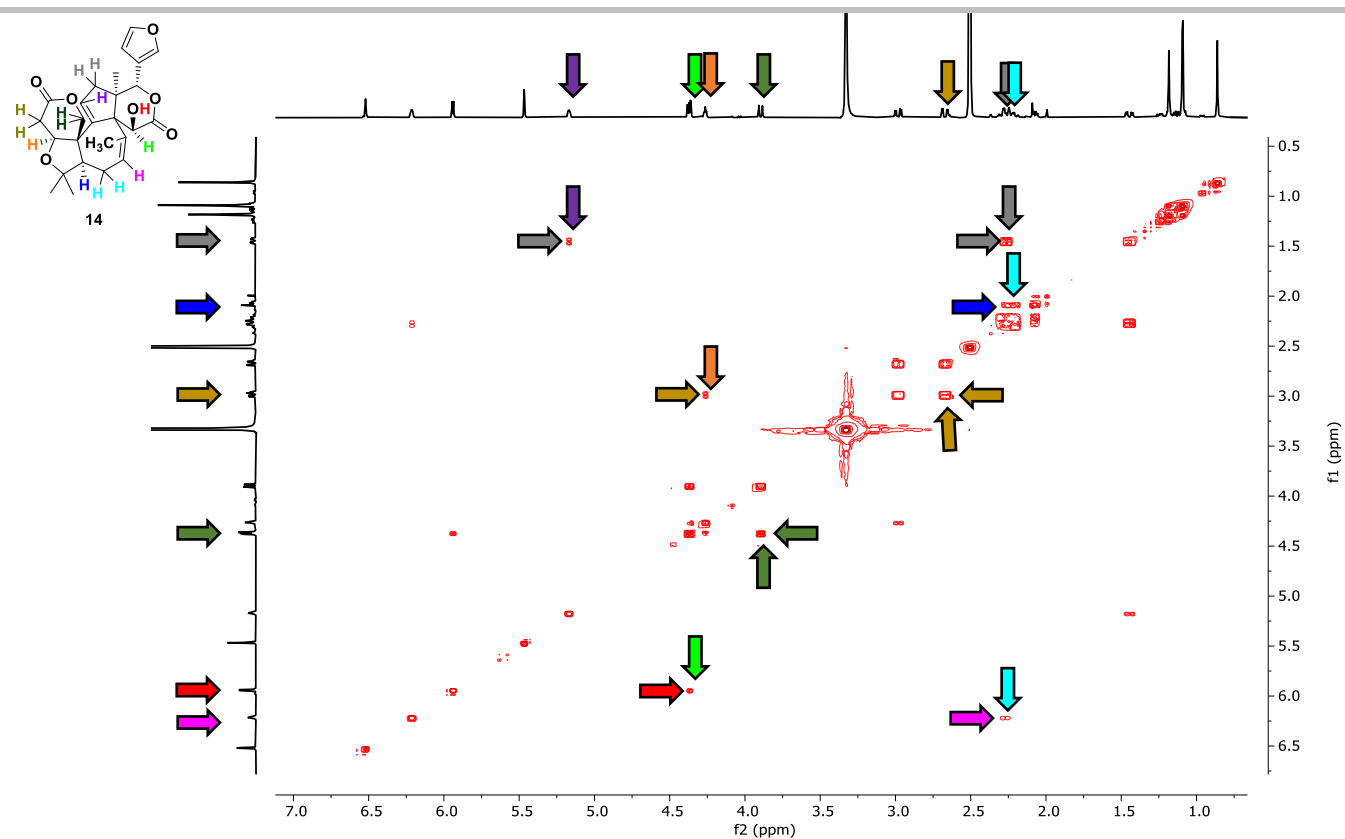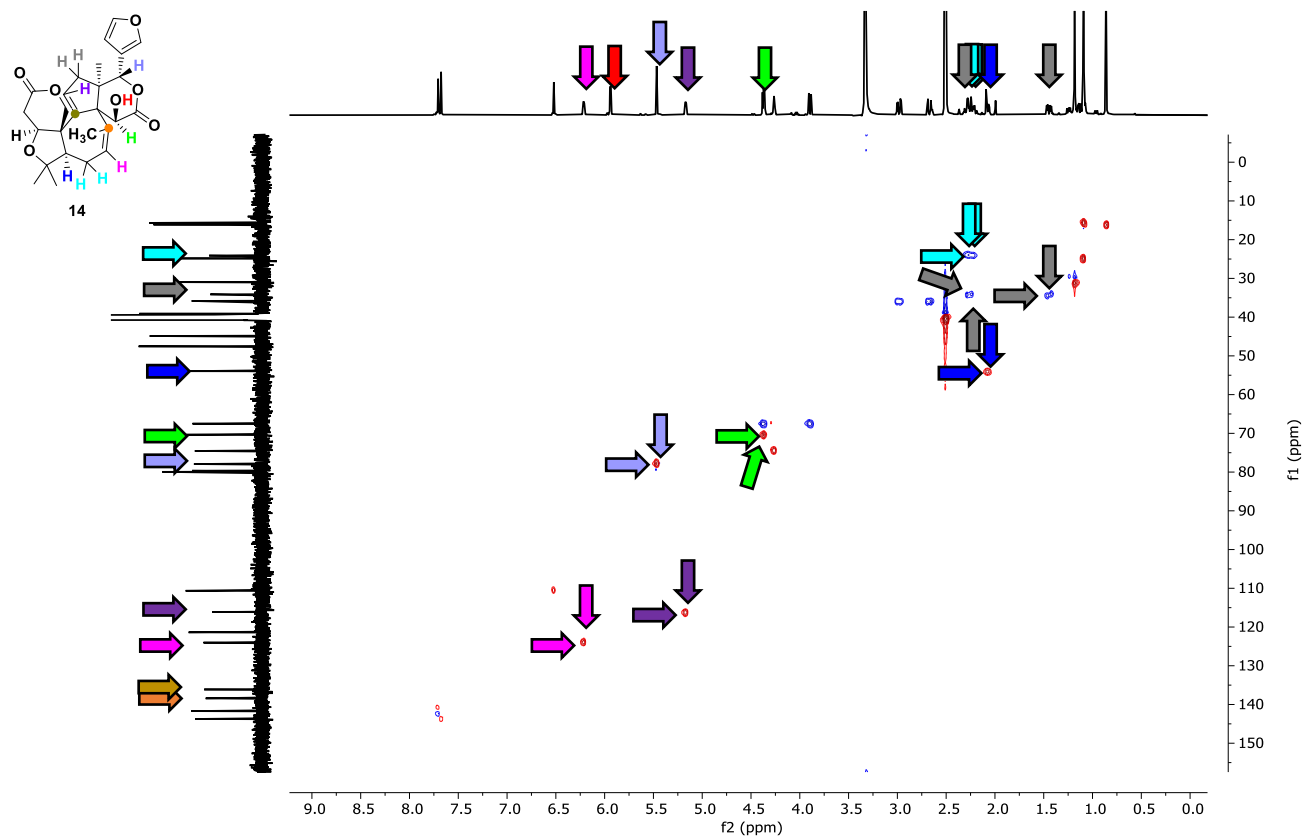

## SUPPORTING INFORMATION

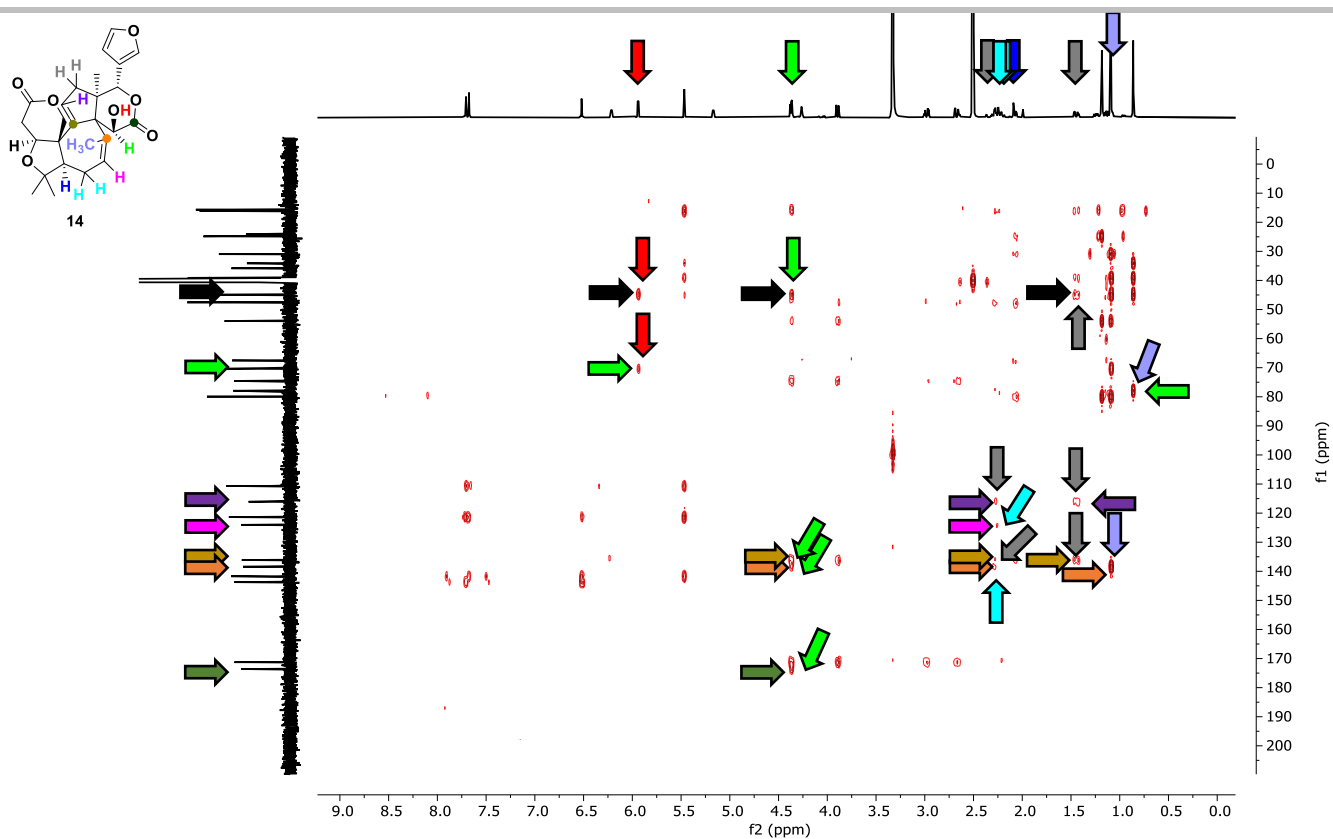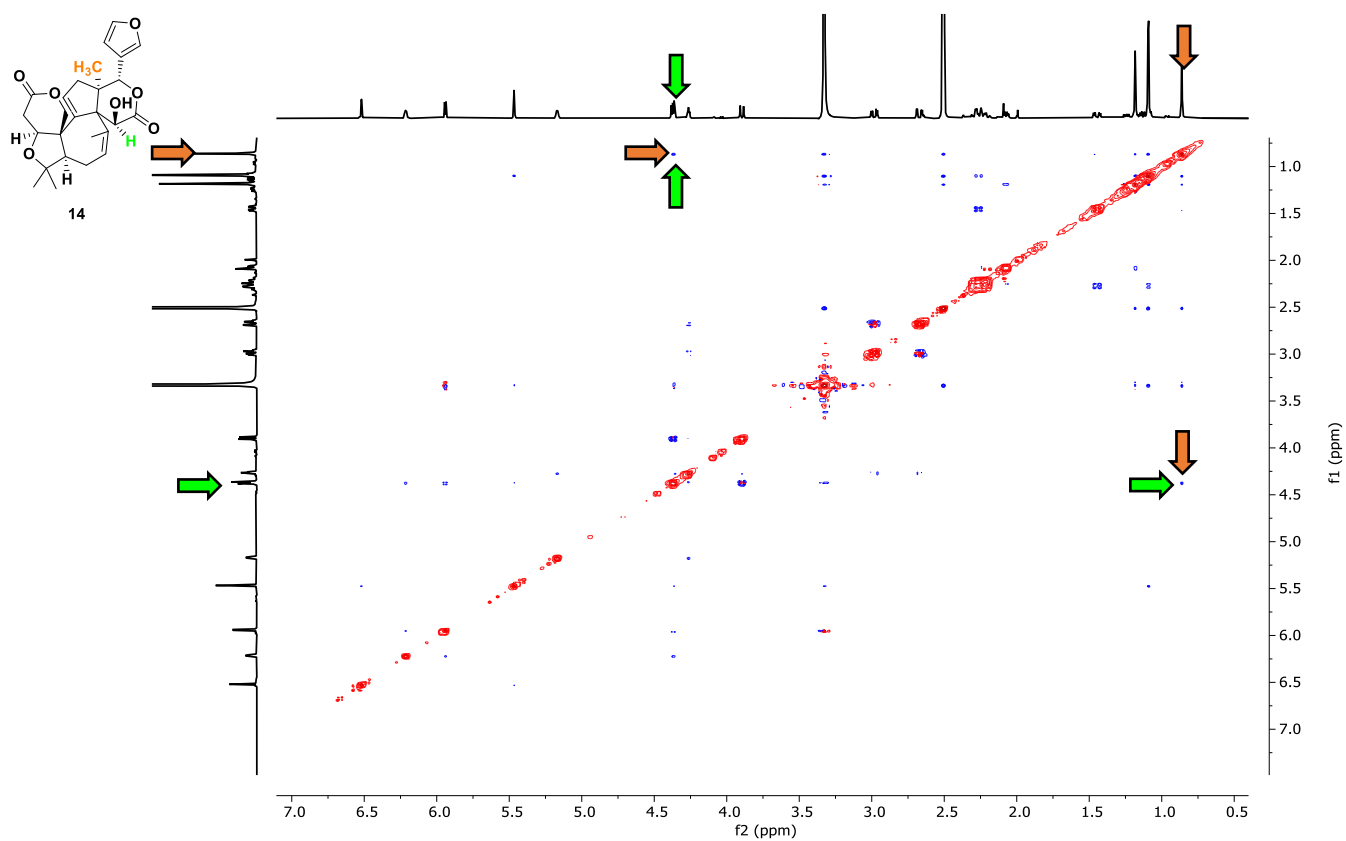

## SUPPORTING INFORMATION

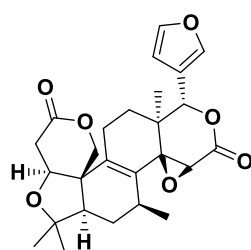

15

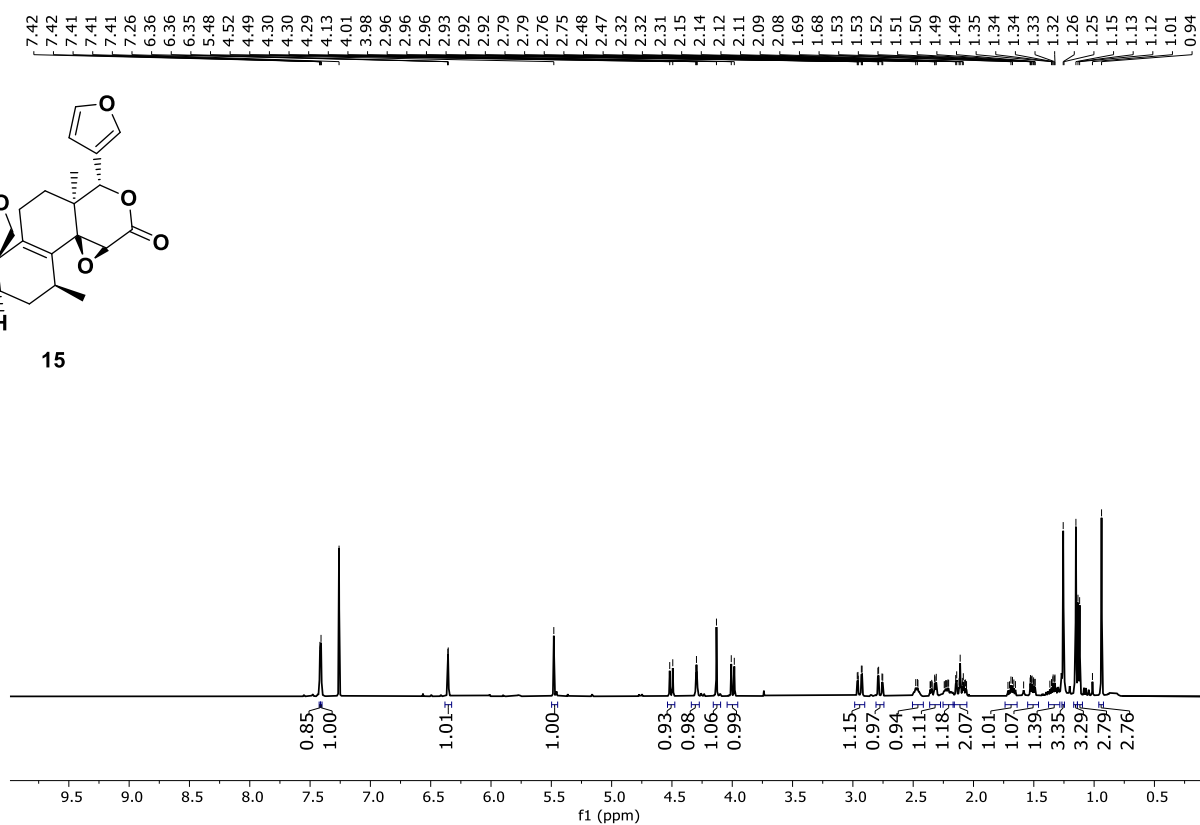<sup>1</sup>H NMR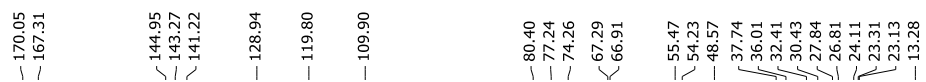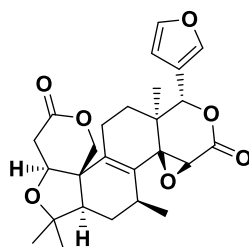

15

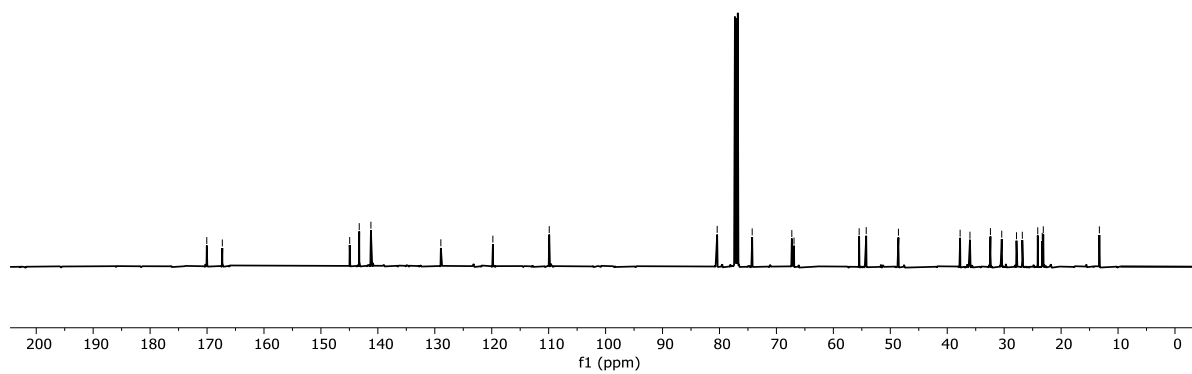<sup>13</sup>C NMR



## SUPPORTING INFORMATION

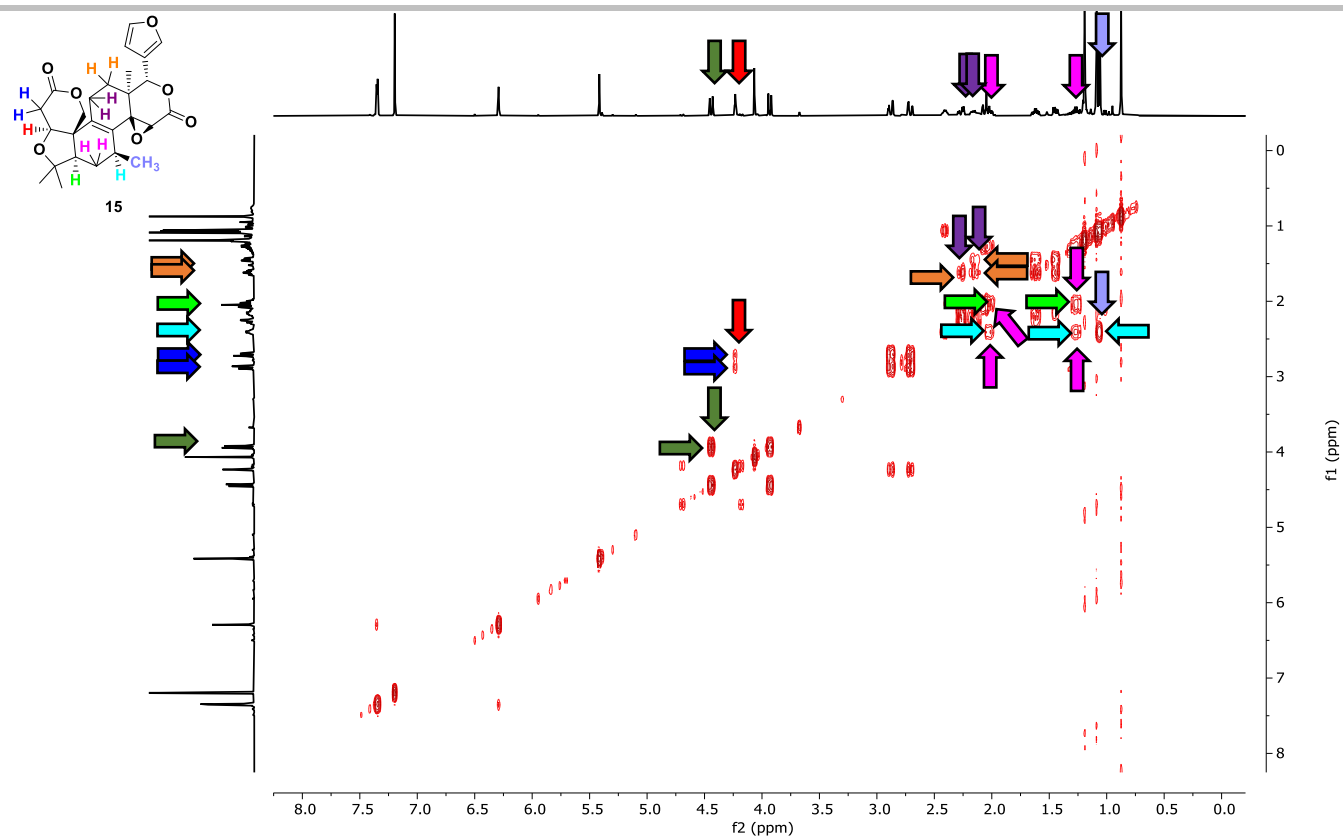 $^1\text{H}$ - $^1\text{H}$  COSY NMR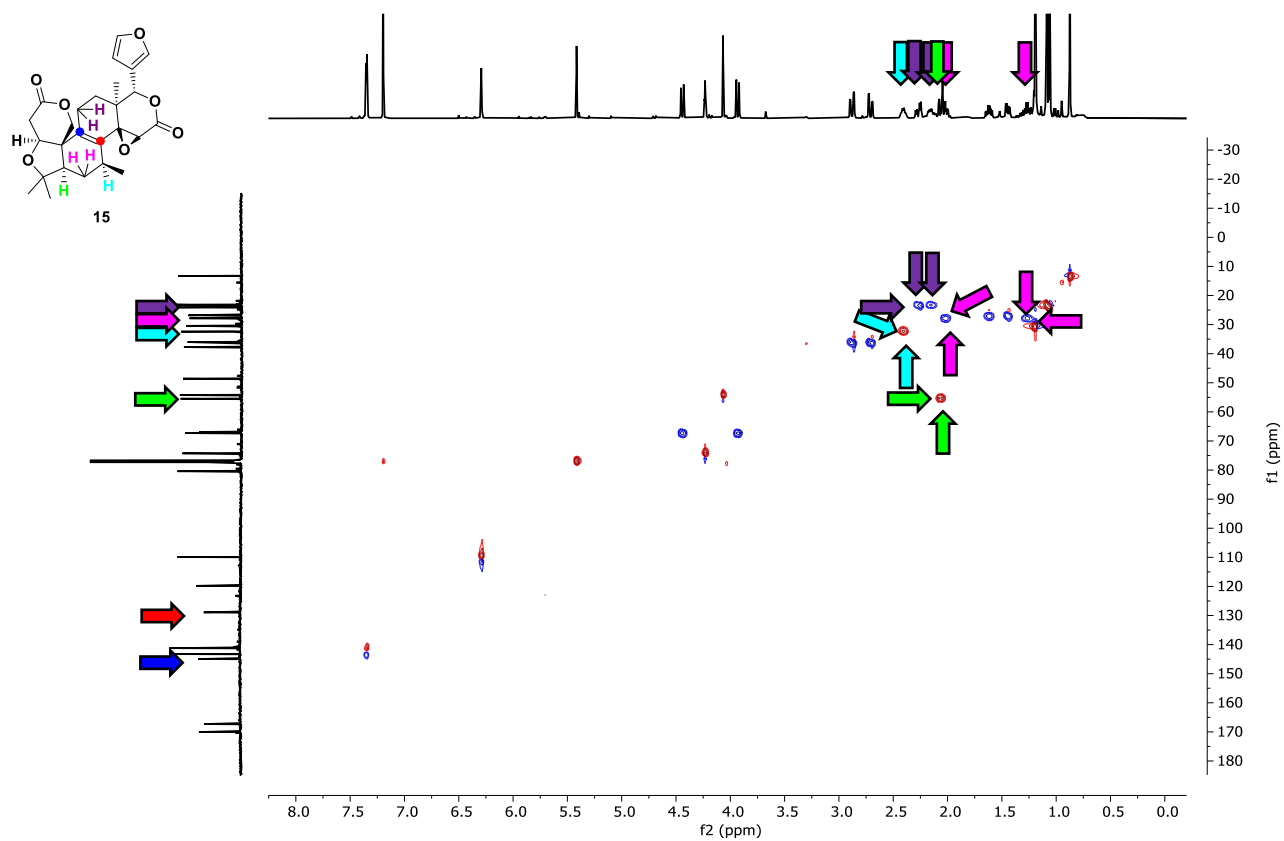 $^1\text{H}$ - $^1\text{H}$  HSQC NMR

## SUPPORTING INFORMATION

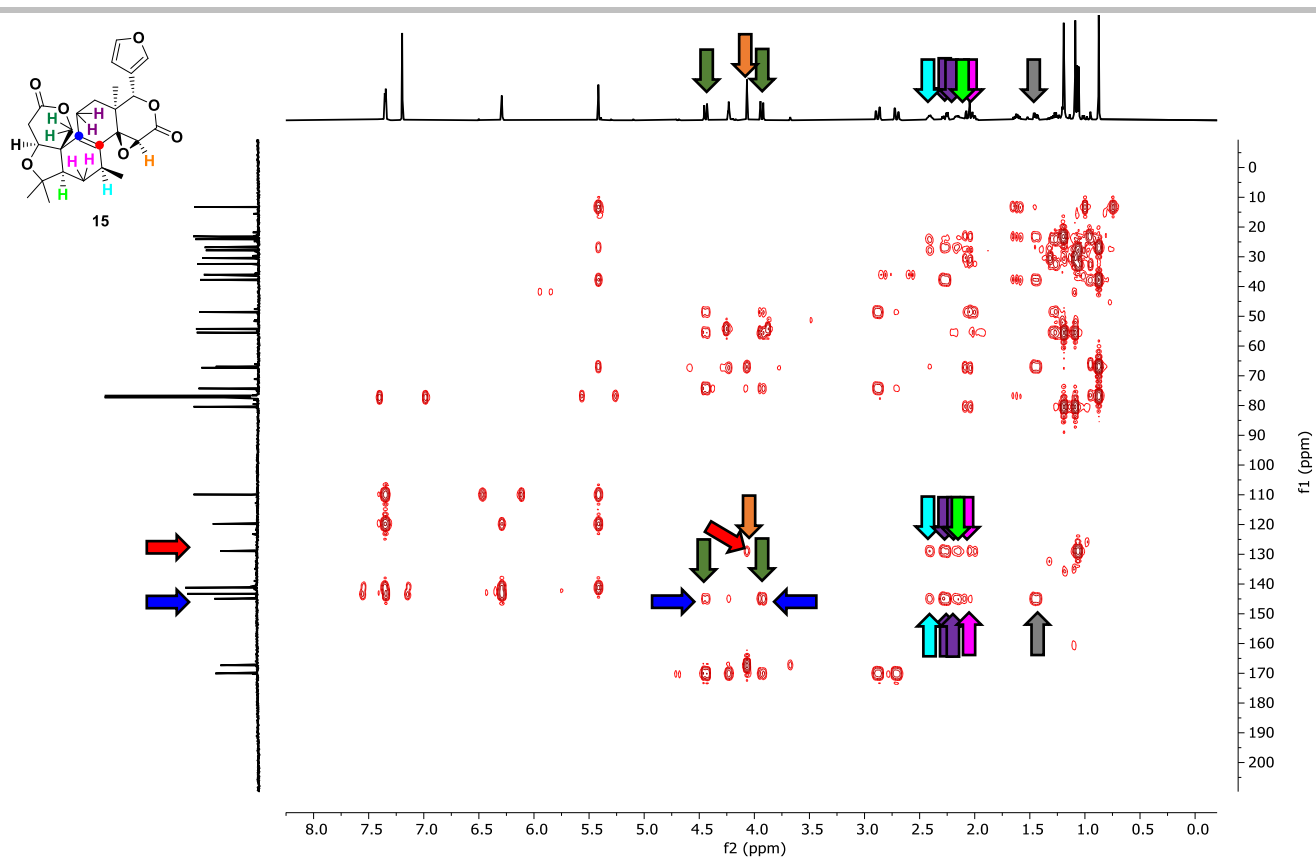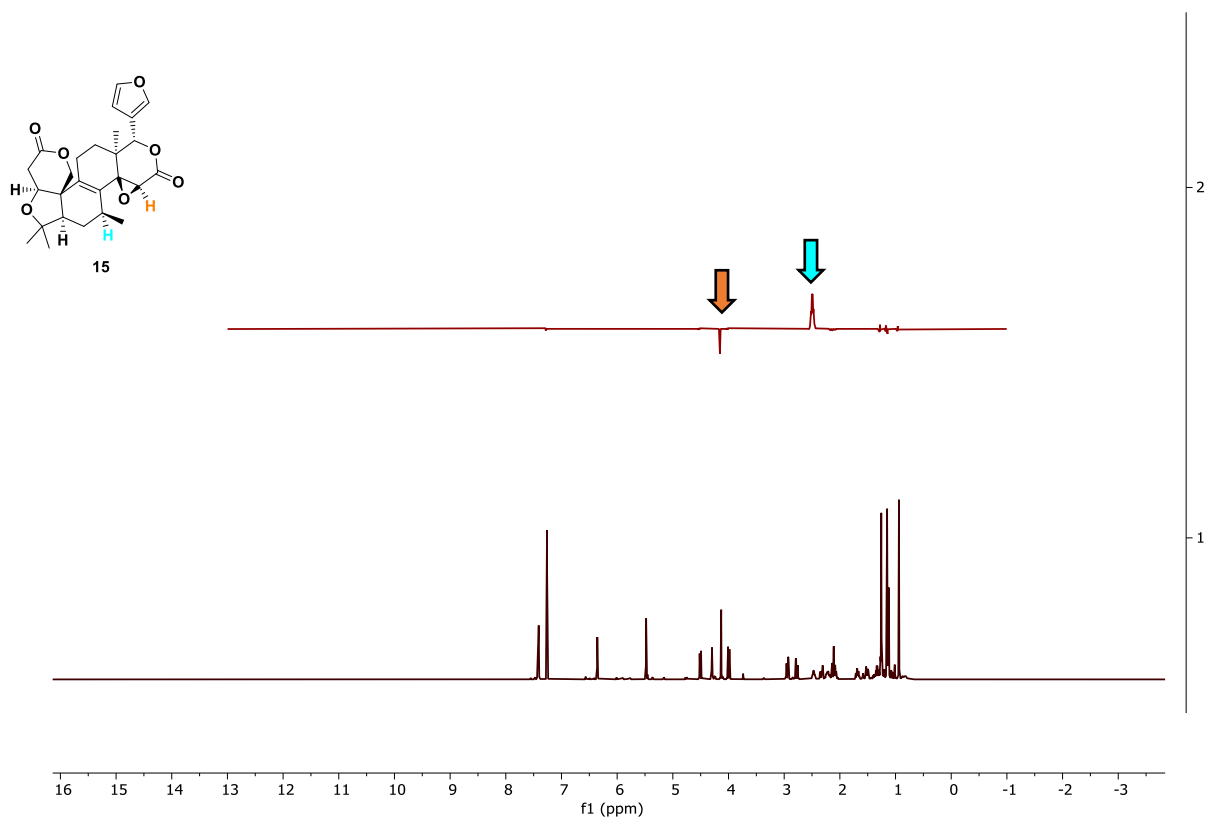

## SUPPORTING INFORMATION

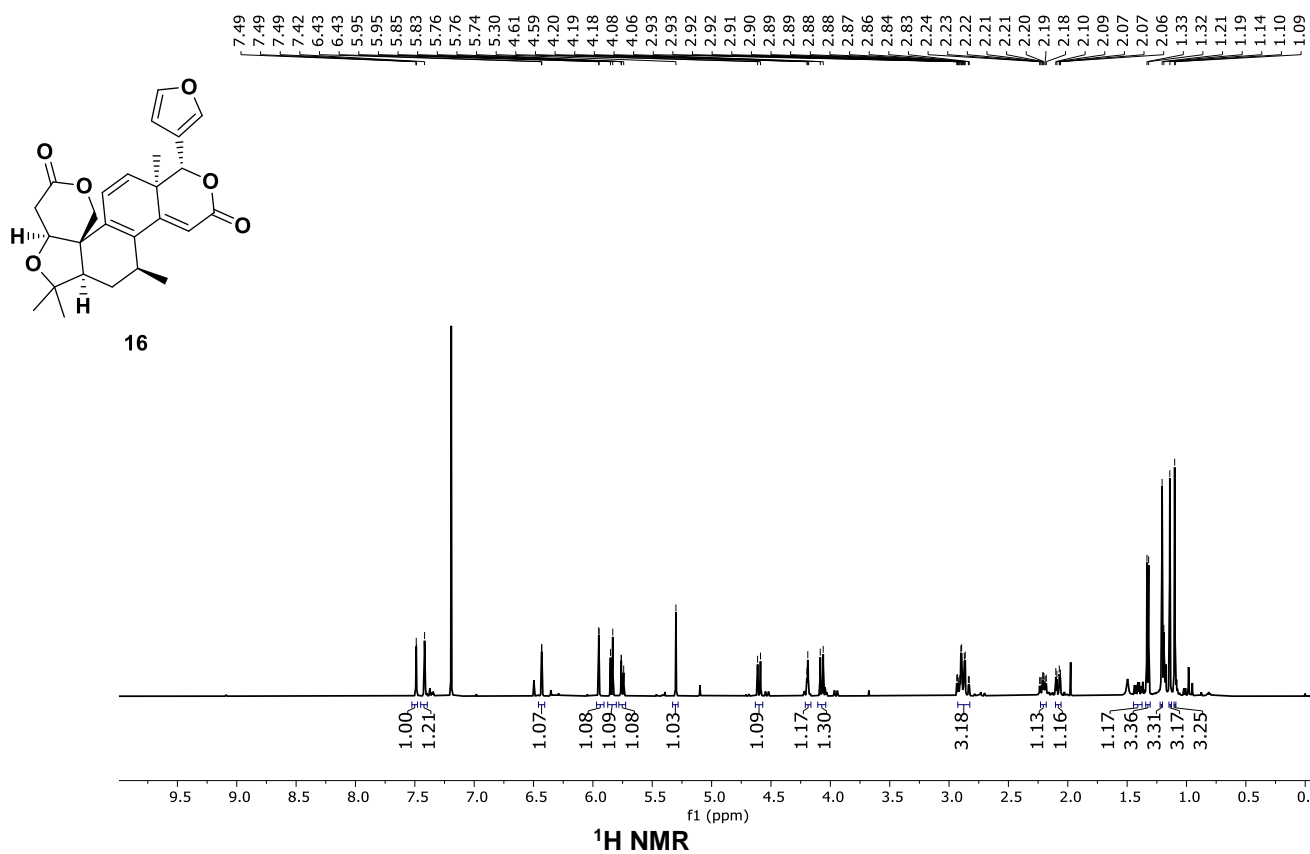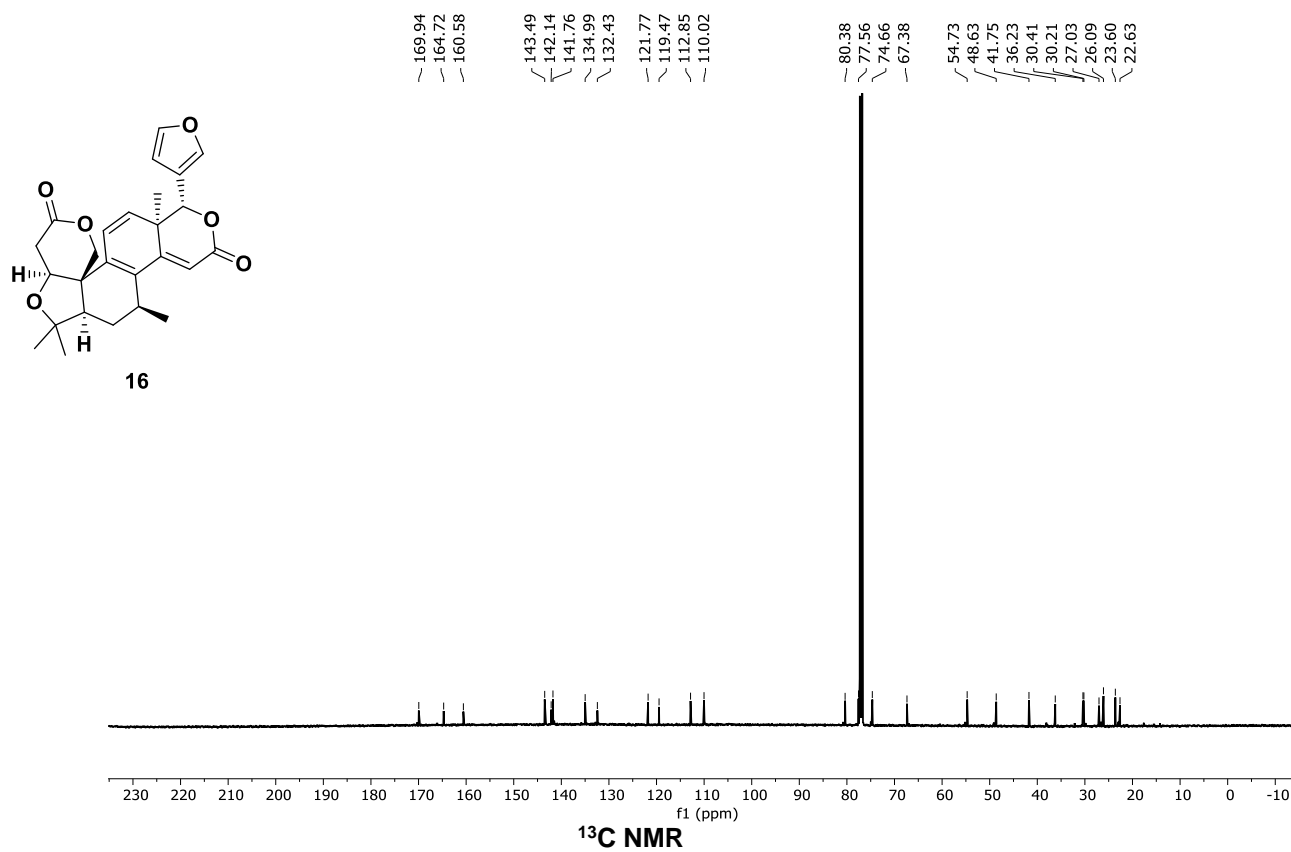

## SUPPORTING INFORMATION

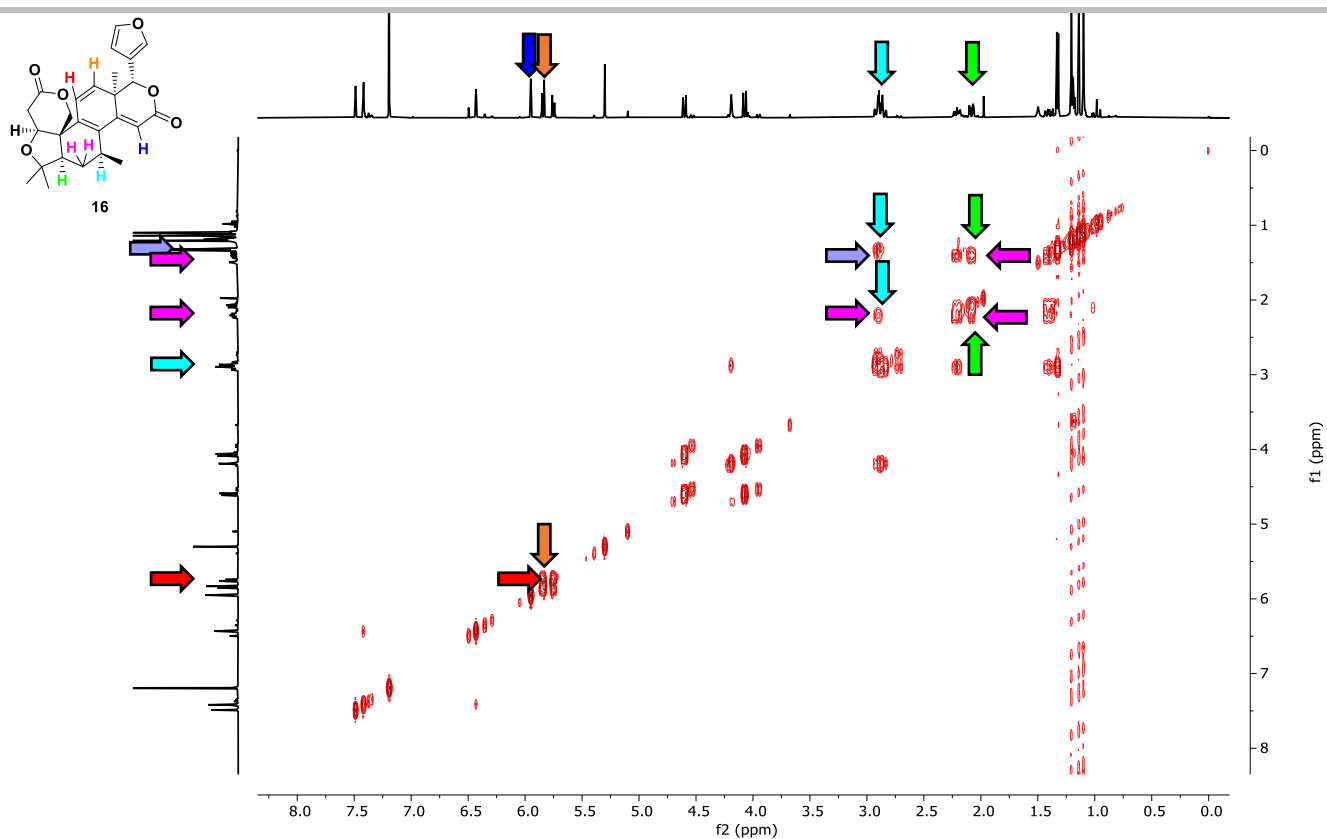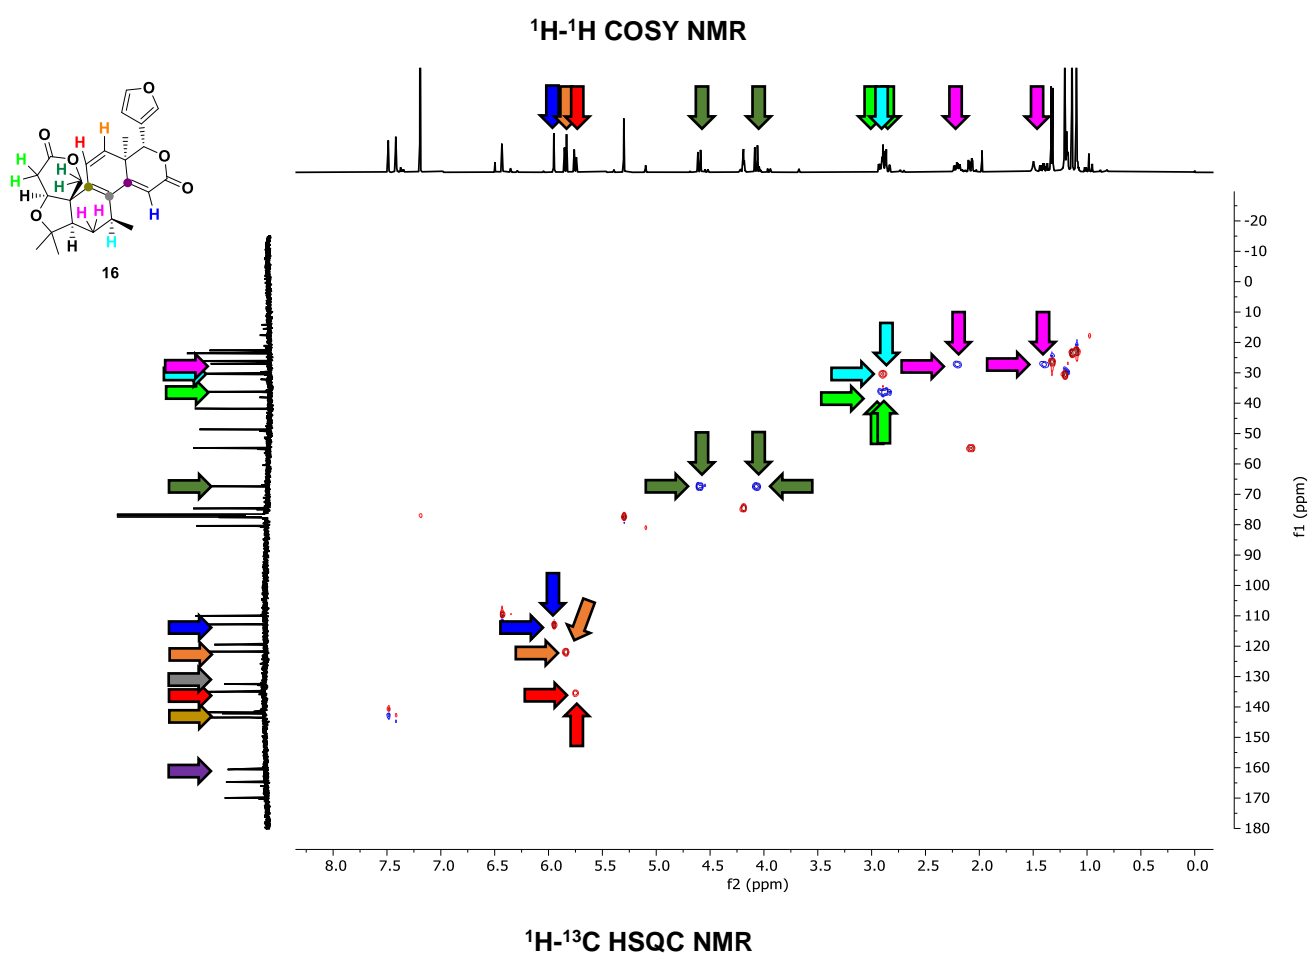

## SUPPORTING INFORMATION

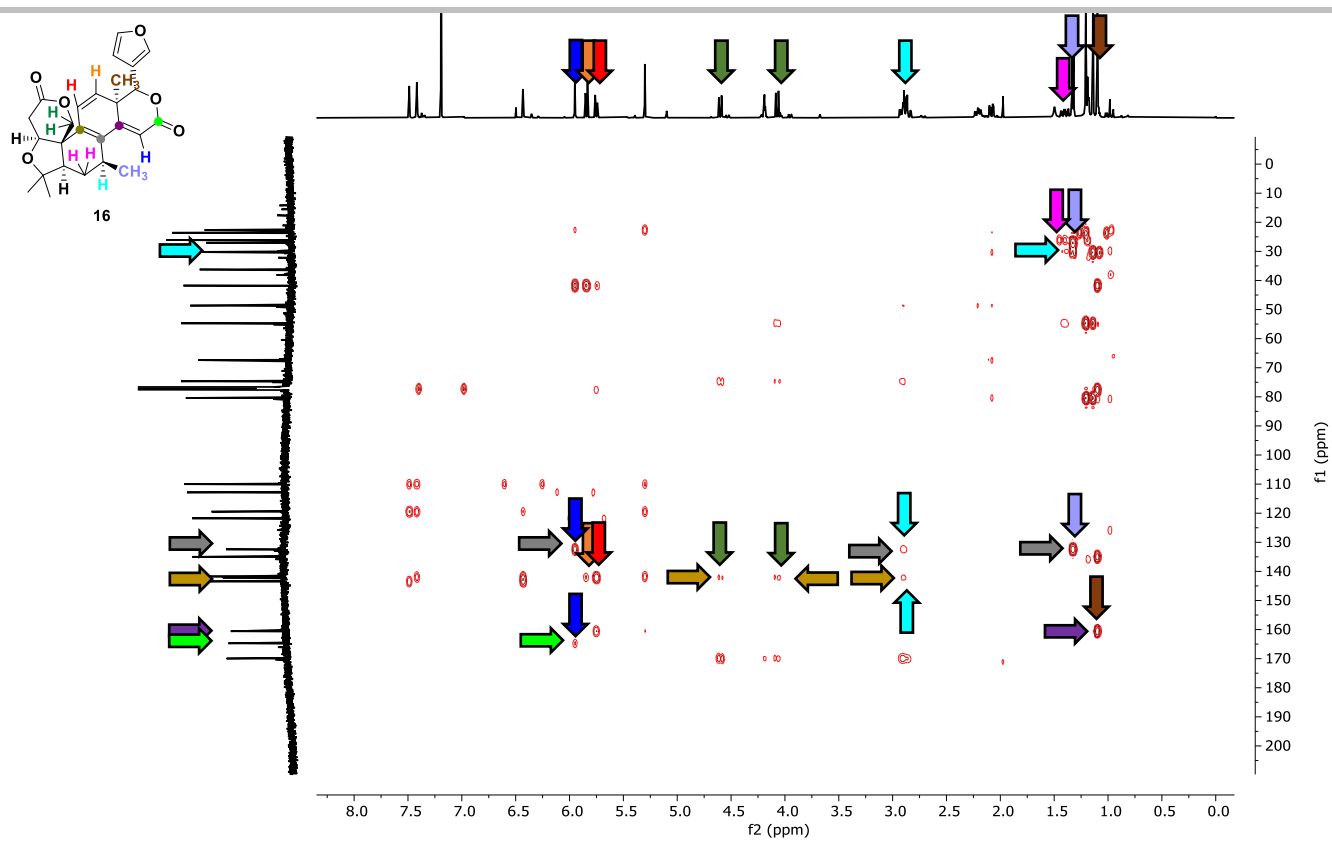 $^1\text{H}$ - $^{13}\text{C}$  HMBC NMR

## SUPPORTING INFORMATION

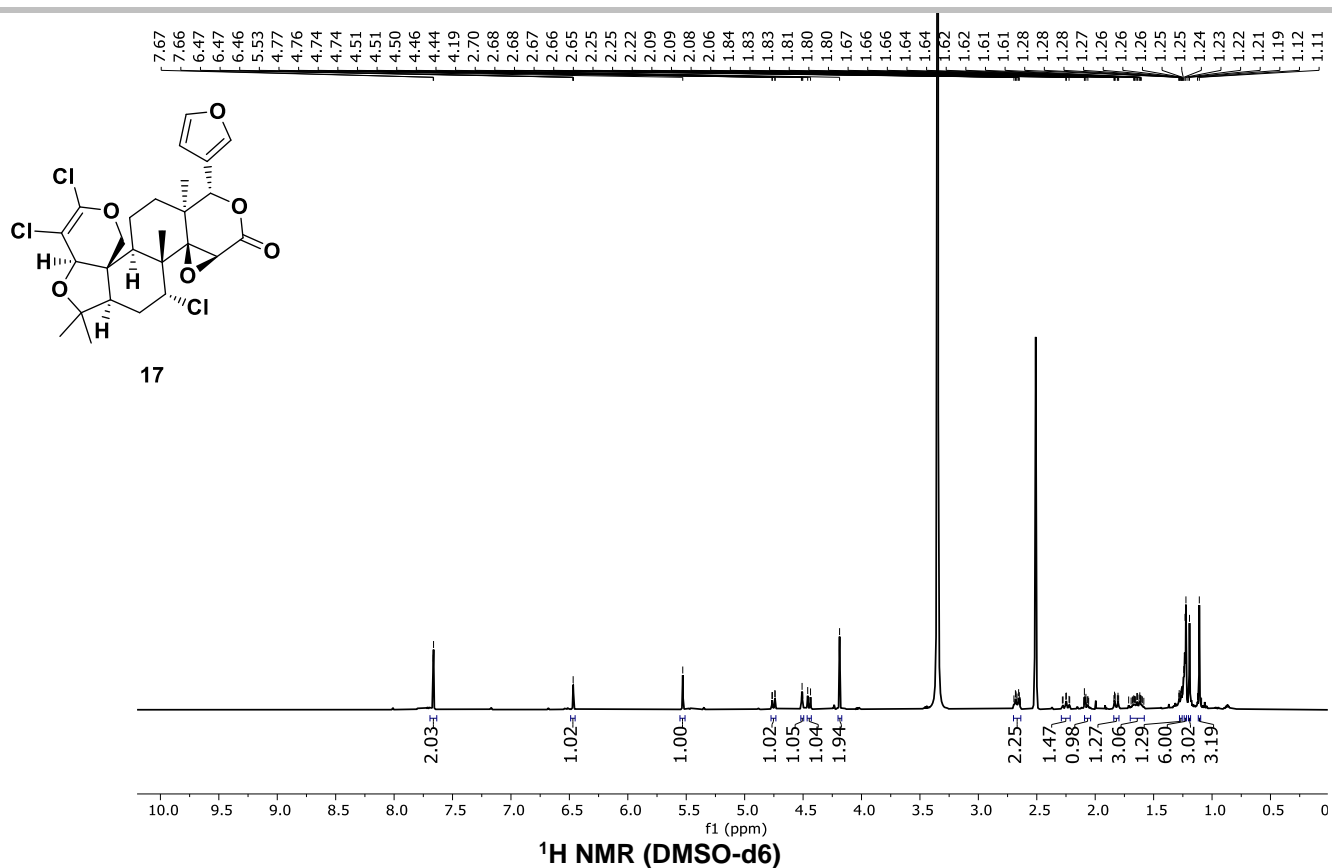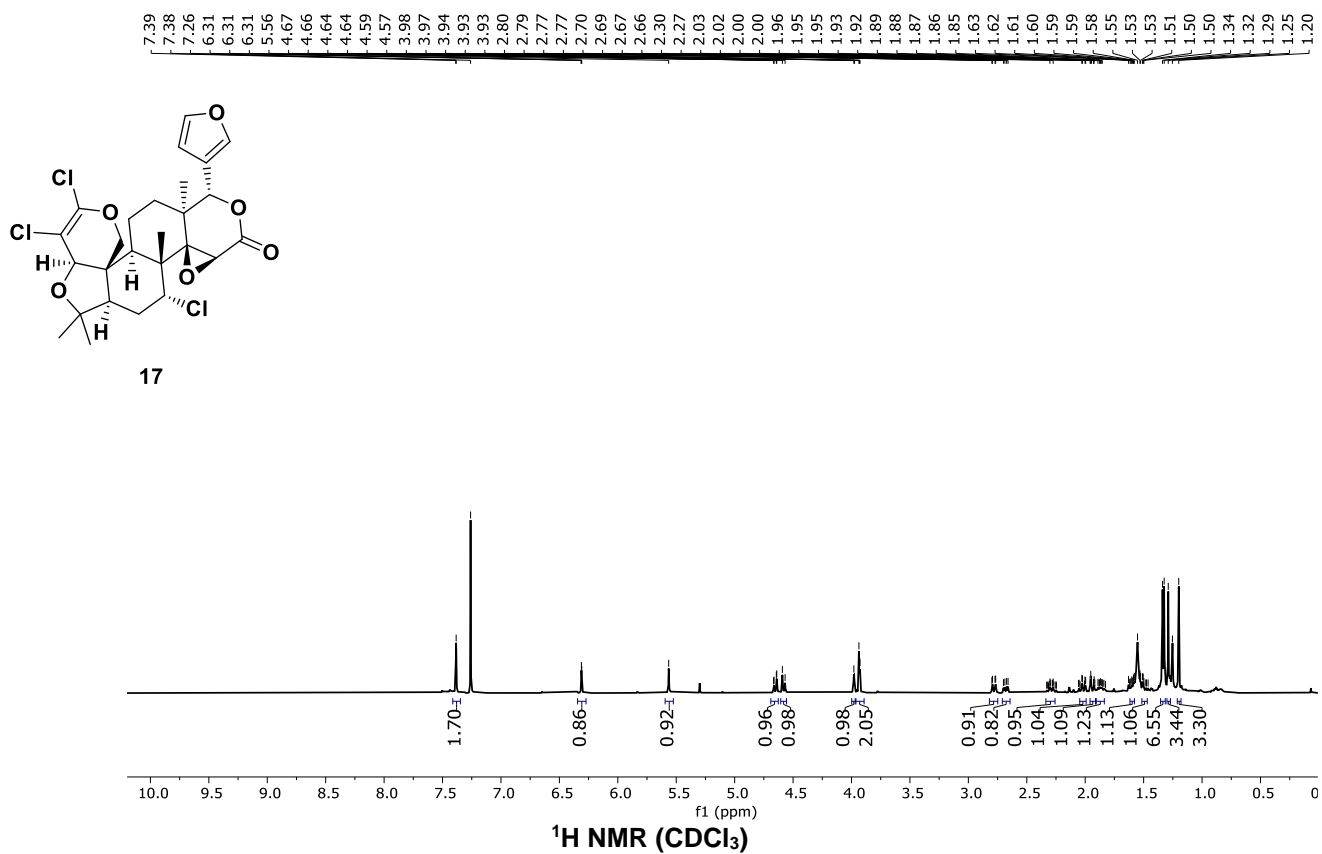

## SUPPORTING INFORMATION

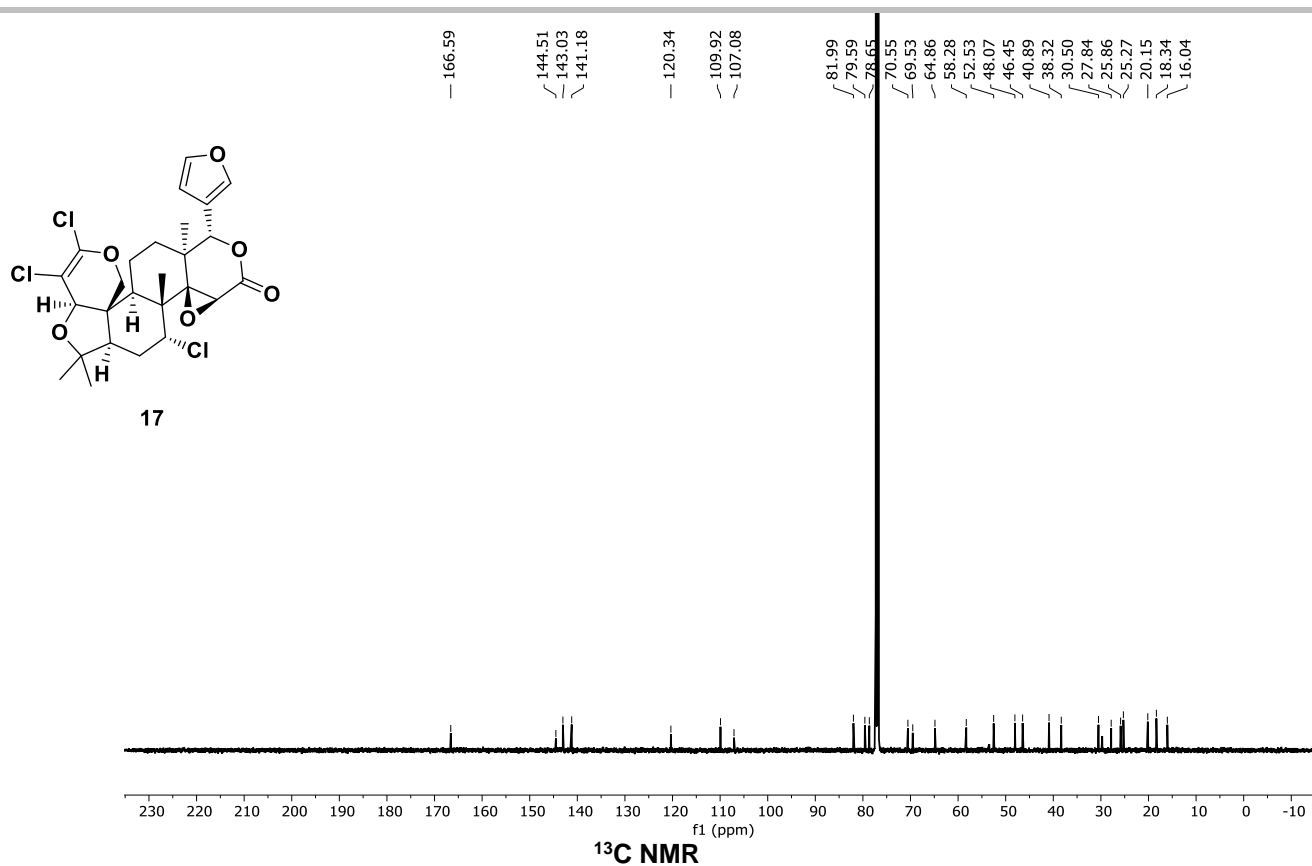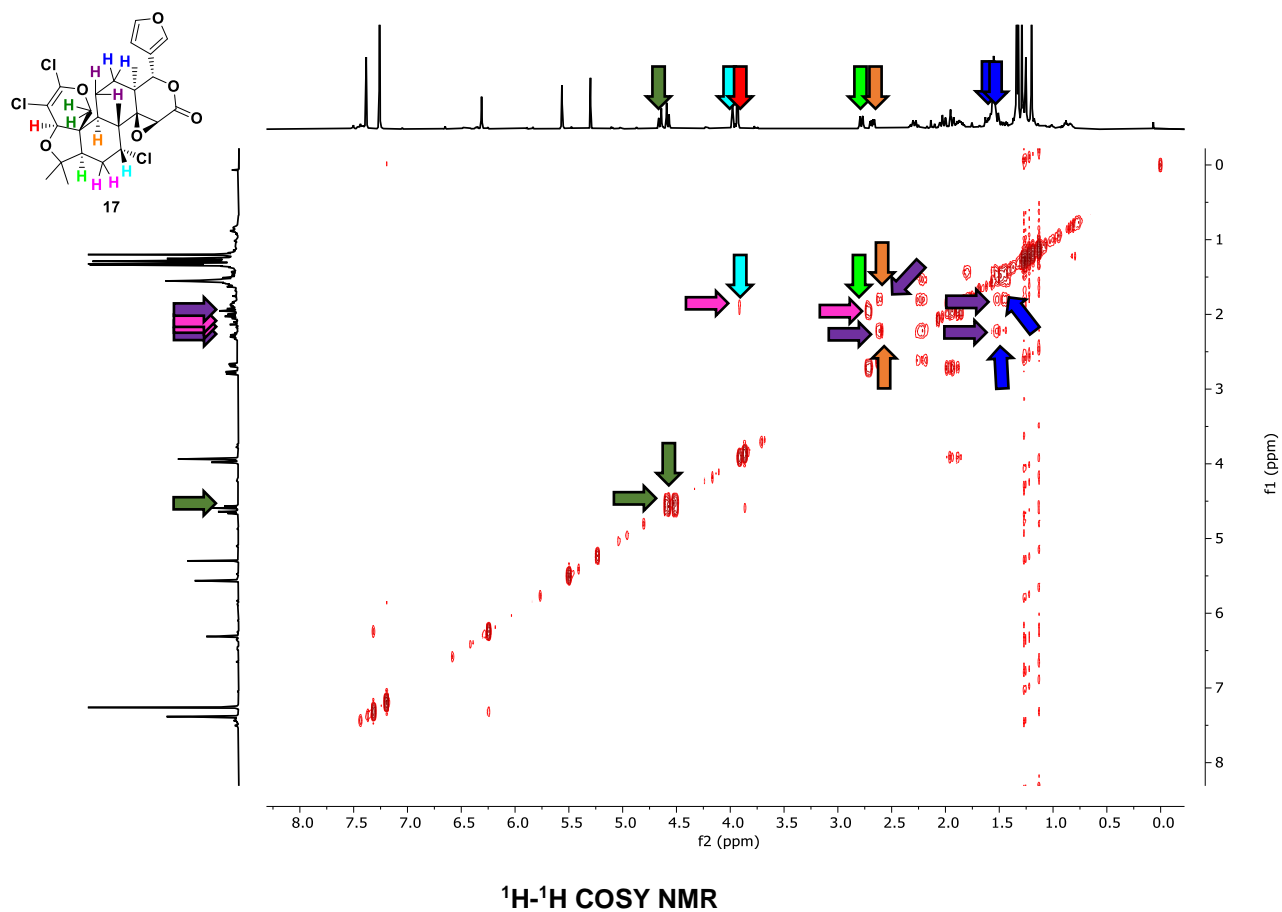

## SUPPORTING INFORMATION

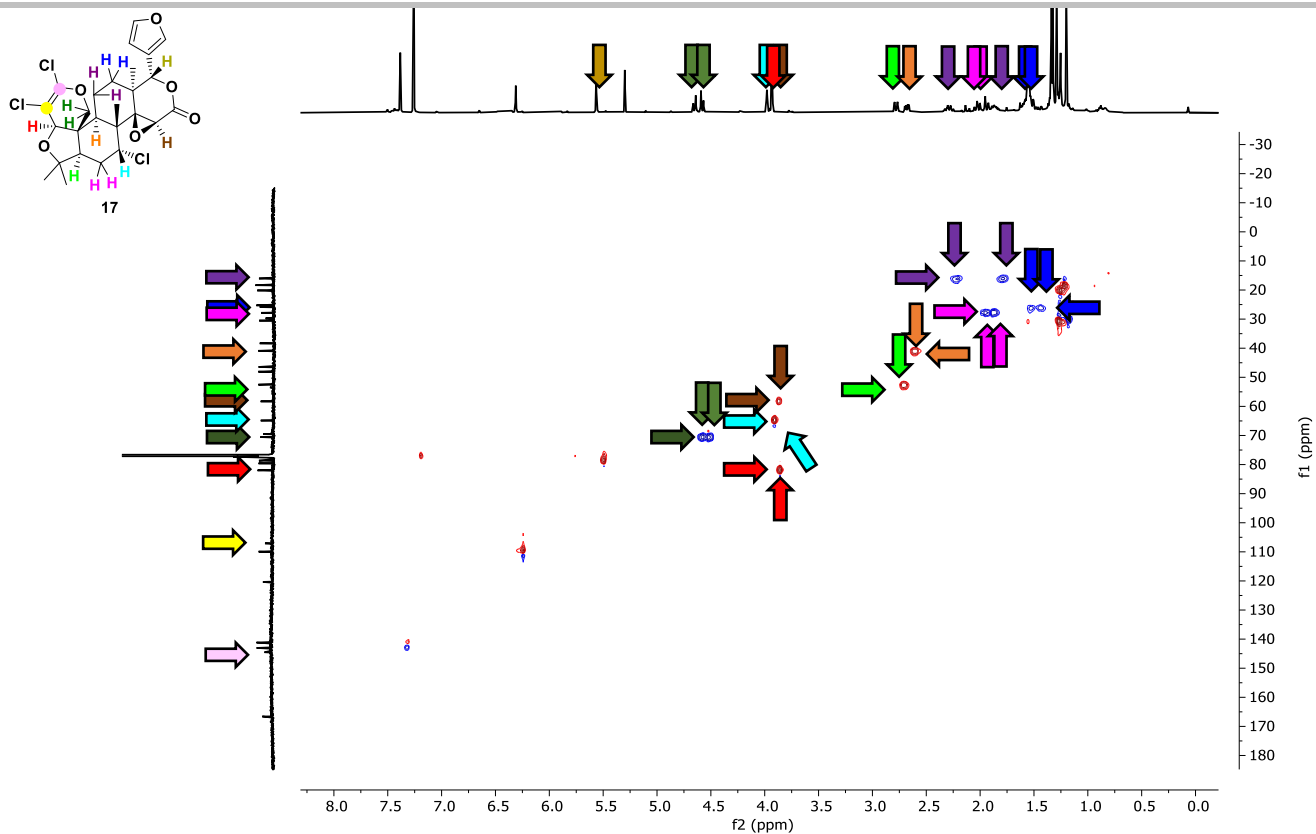 $^1\text{H}$ - $^{13}\text{C}$  HSQC NMR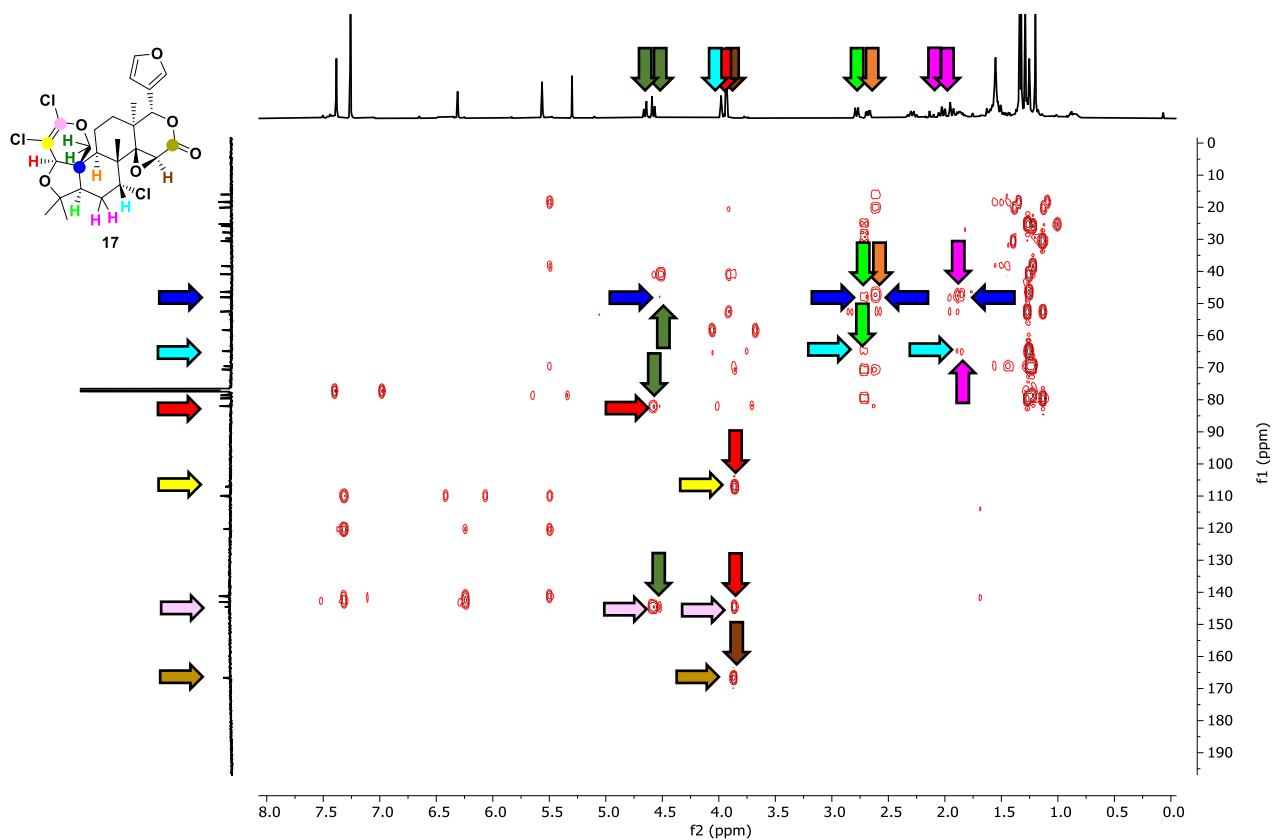 $^1\text{H}$ - $^{13}\text{C}$  HMBC NMR



## SUPPORTING INFORMATION

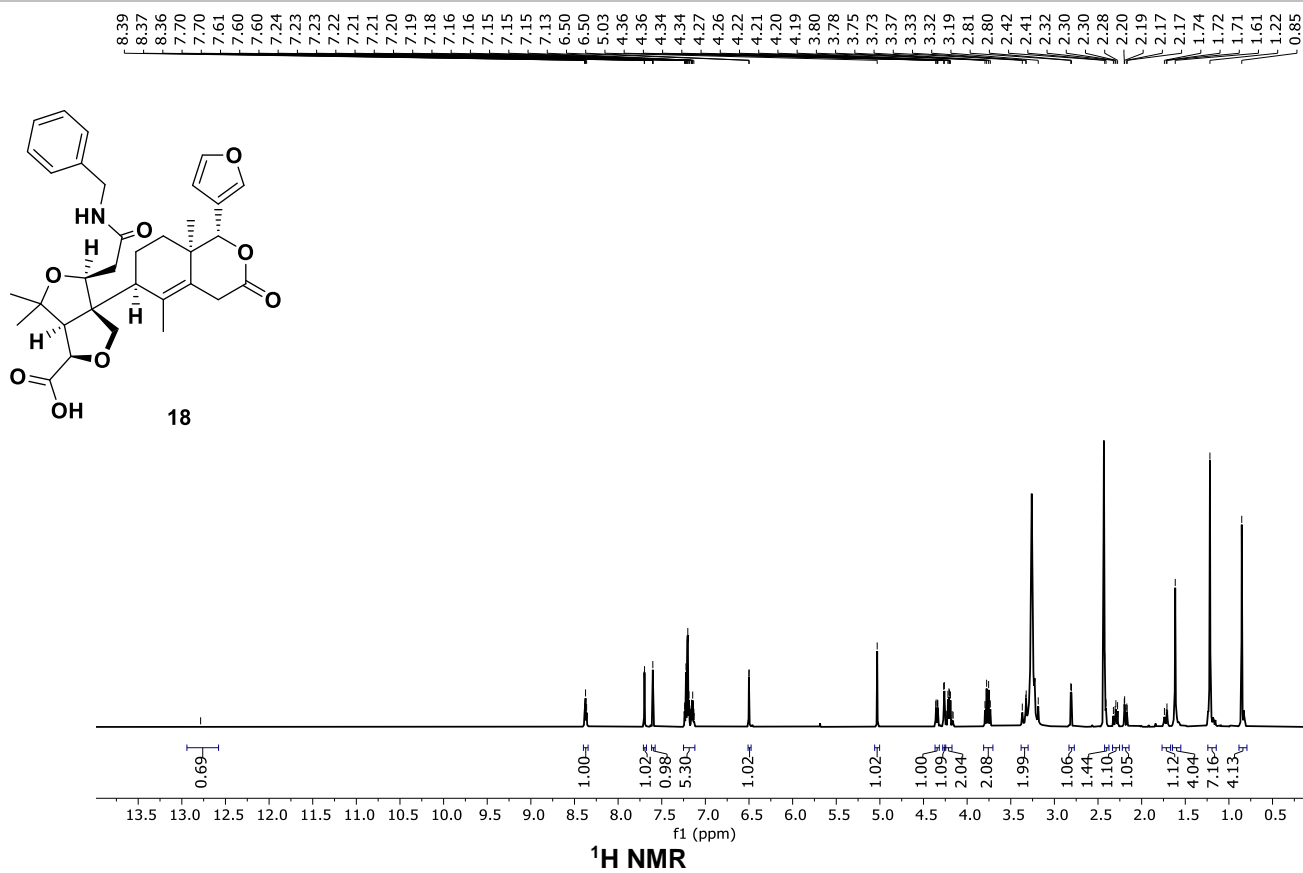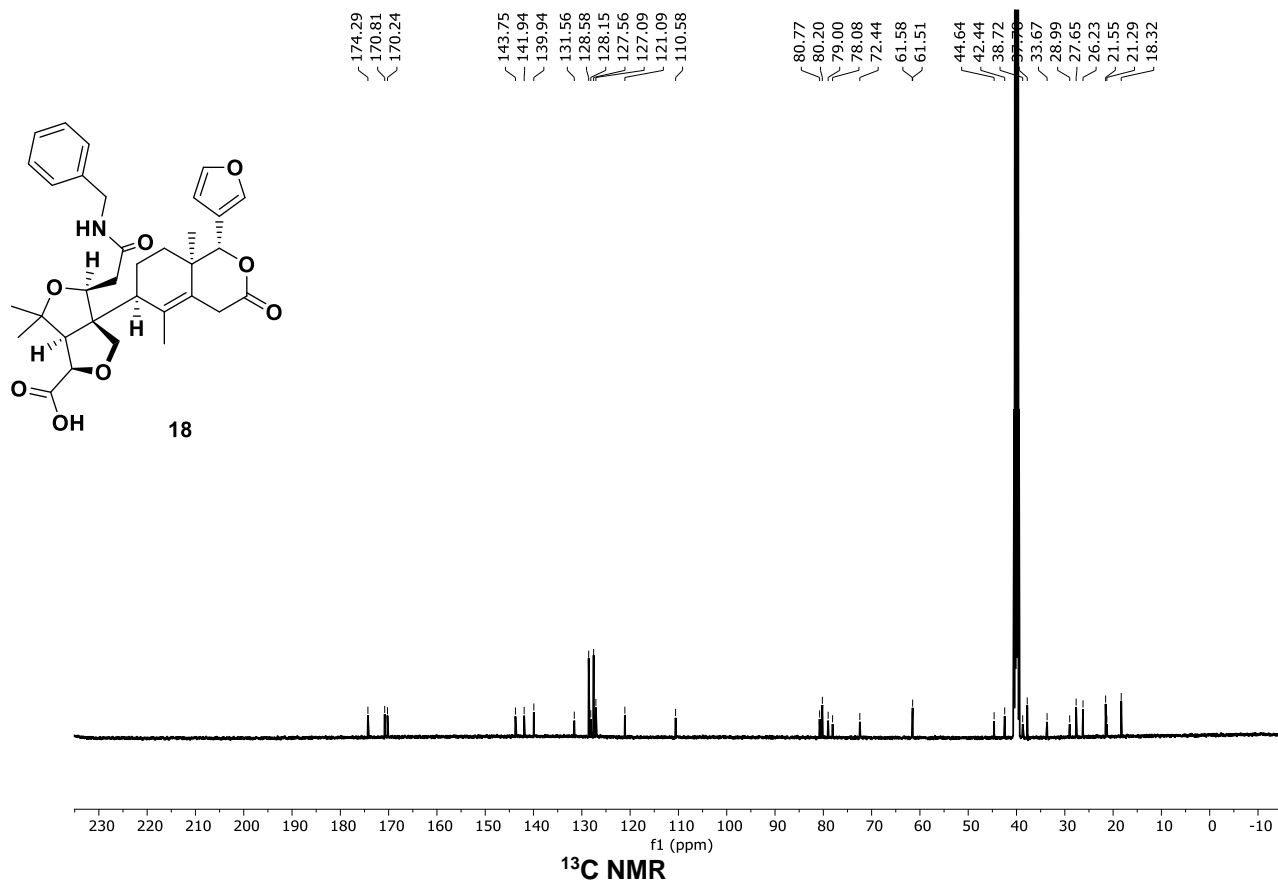

## SUPPORTING INFORMATION

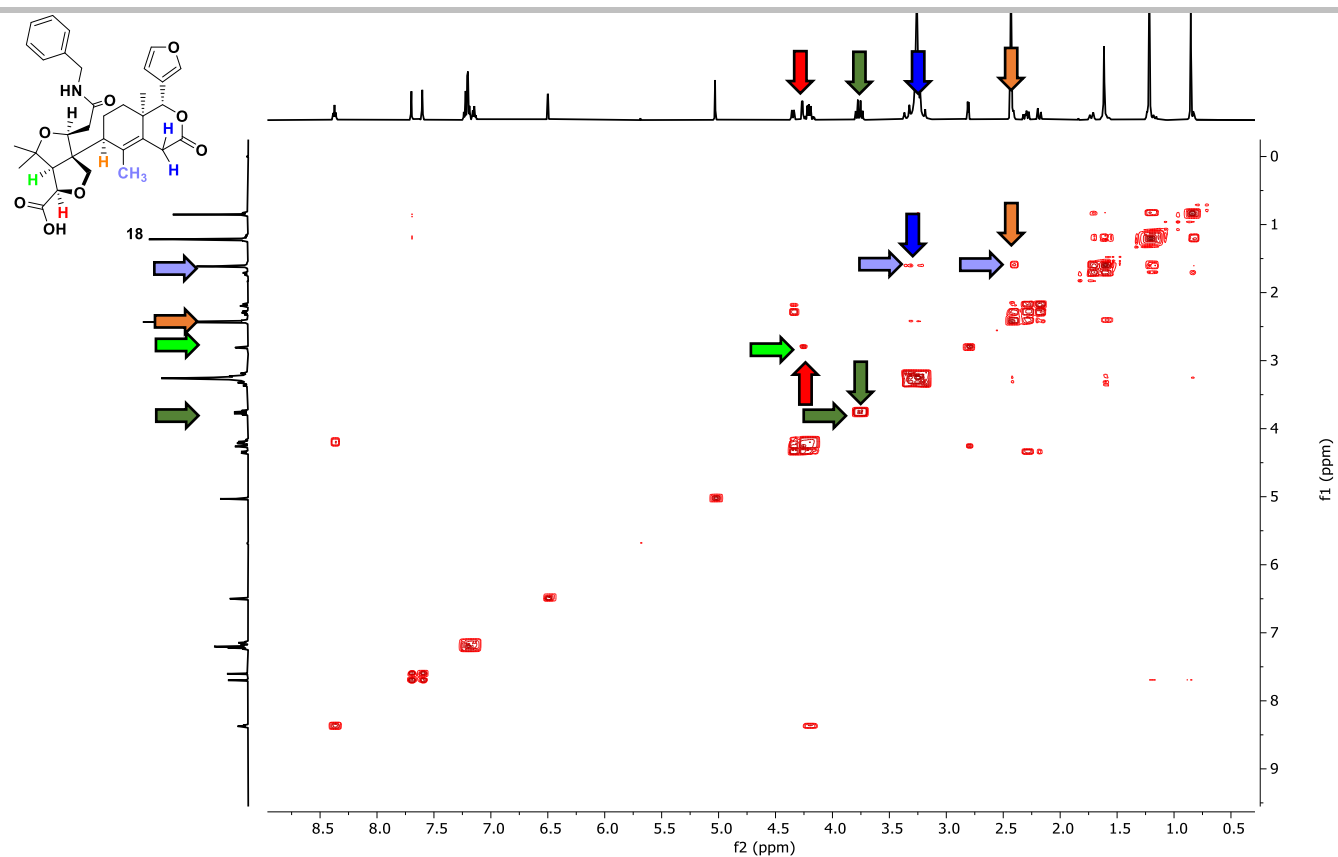 $^1\text{H}$ - $^1\text{H}$  COSY NMR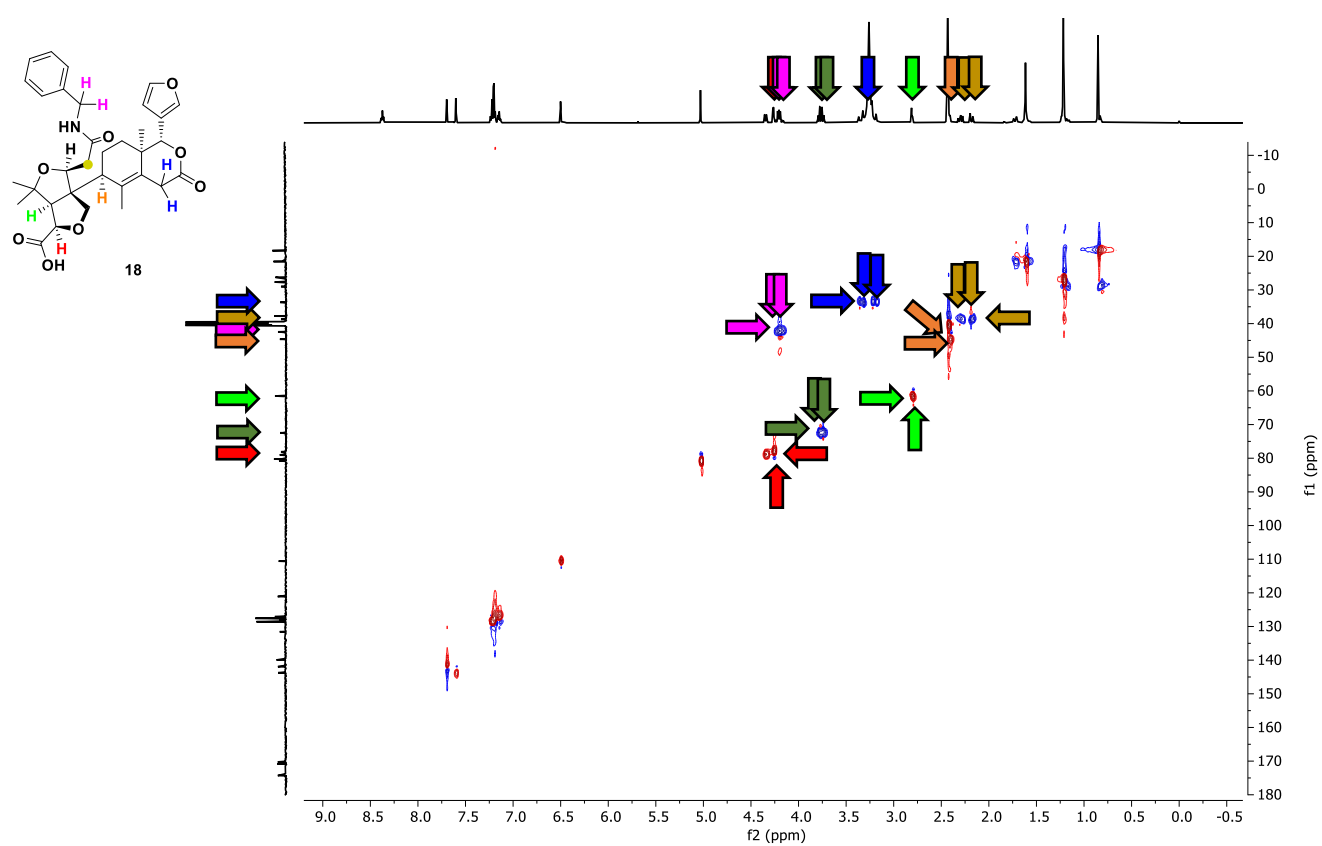 $^1\text{H}$ - $^{13}\text{C}$  HSQC NMR

## SUPPORTING INFORMATION

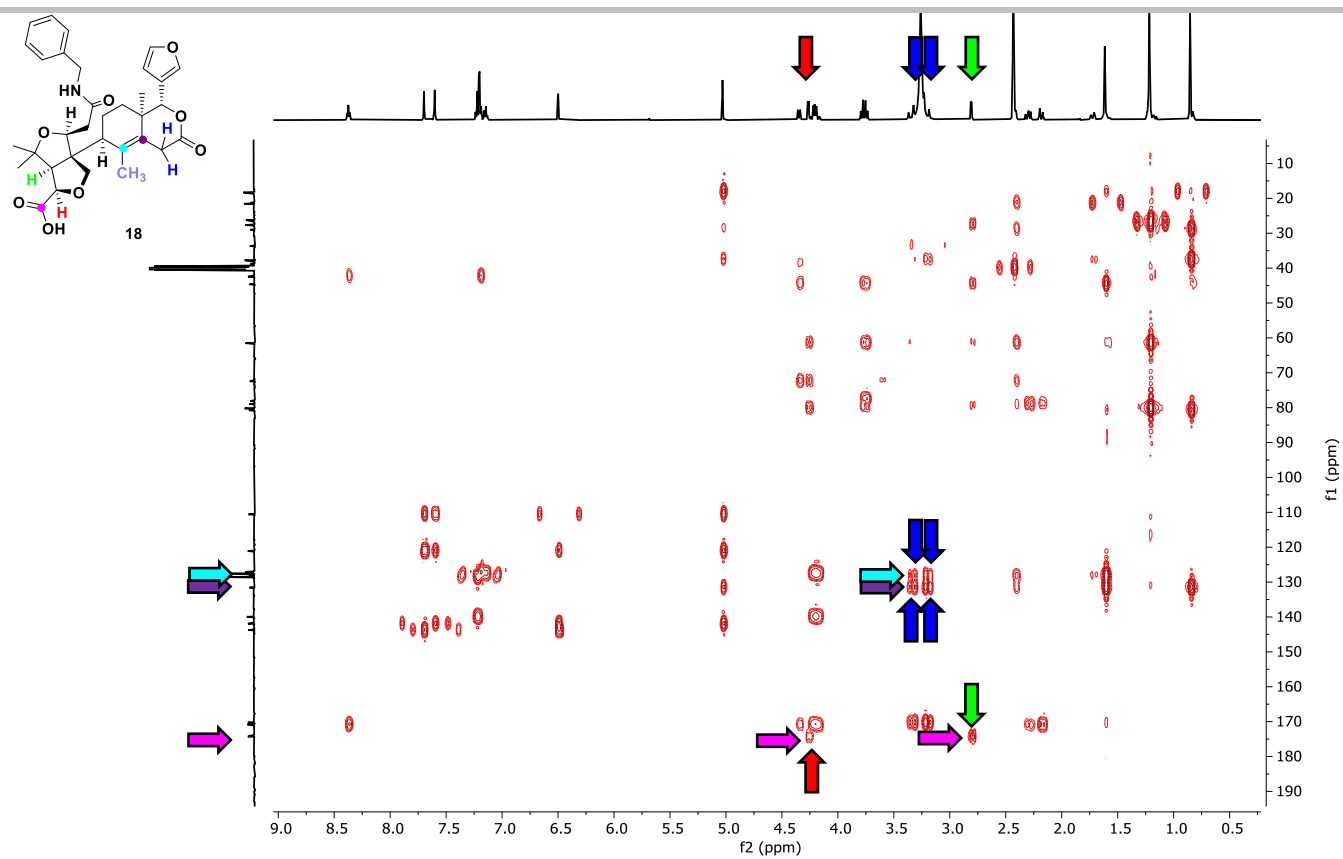 $^1\text{H}$ - $^{13}\text{C}$  HMBC NMR

## SUPPORTING INFORMATION

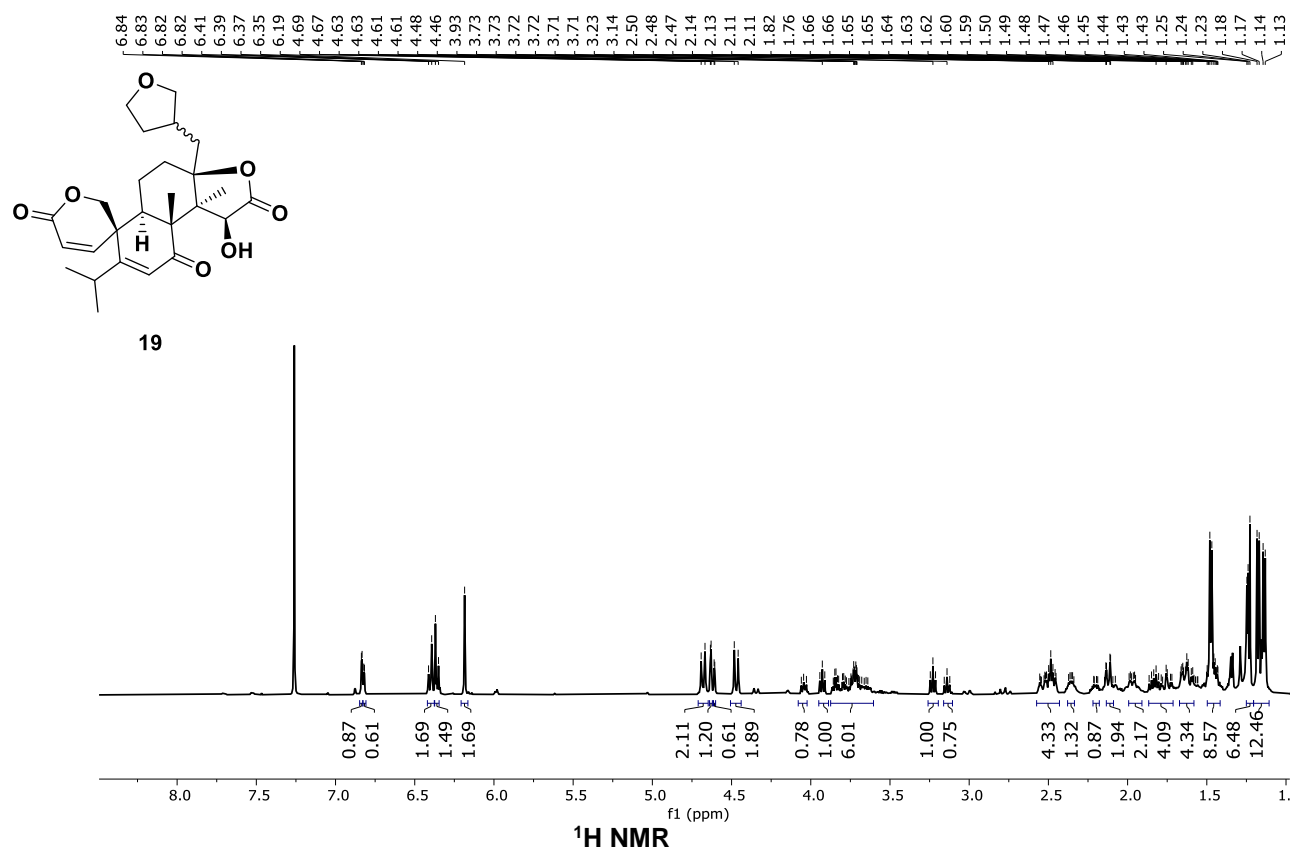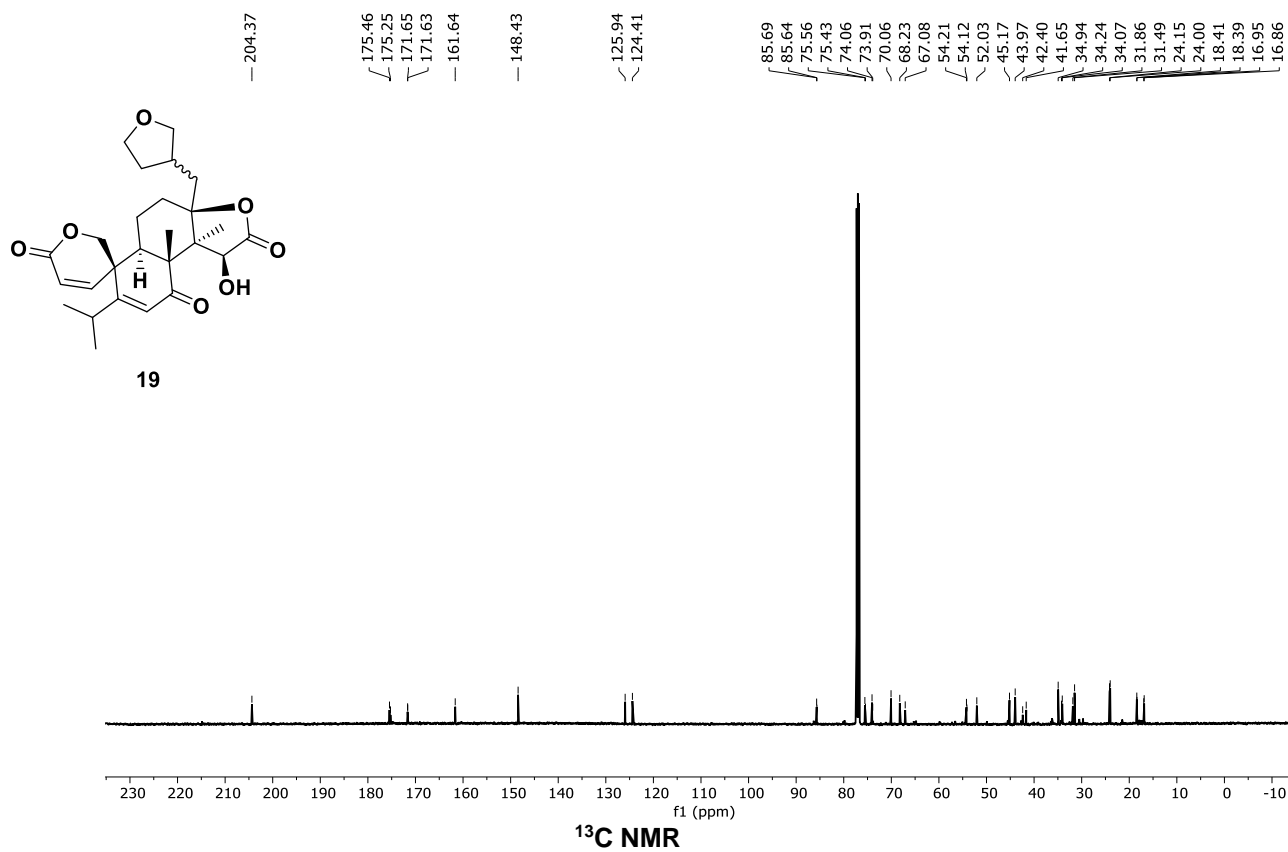

## SUPPORTING INFORMATION

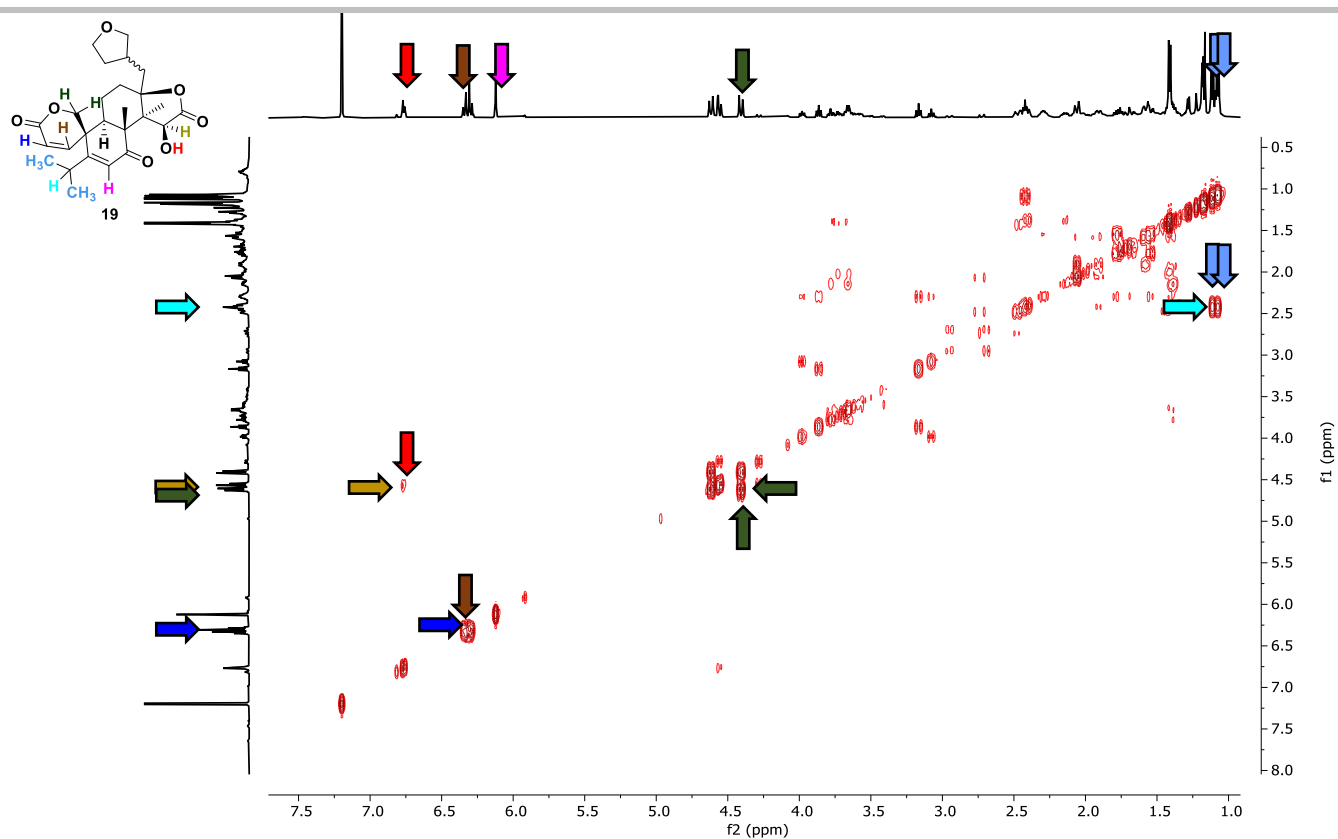 $^1\text{H}$ - $^1\text{H}$  COSY NMR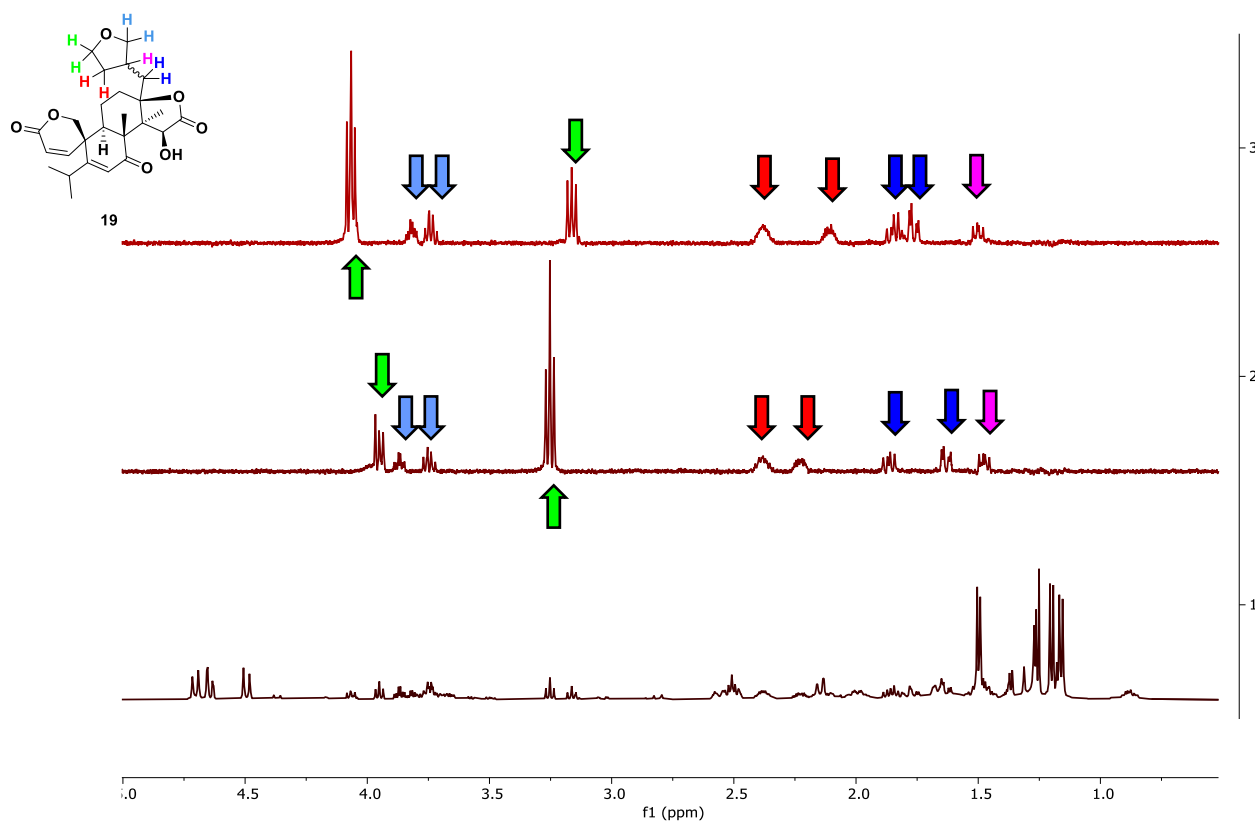 $^1\text{H}$ - $^1\text{H}$  1D TOCSY NMR (two diastereoisomers)

## SUPPORTING INFORMATION

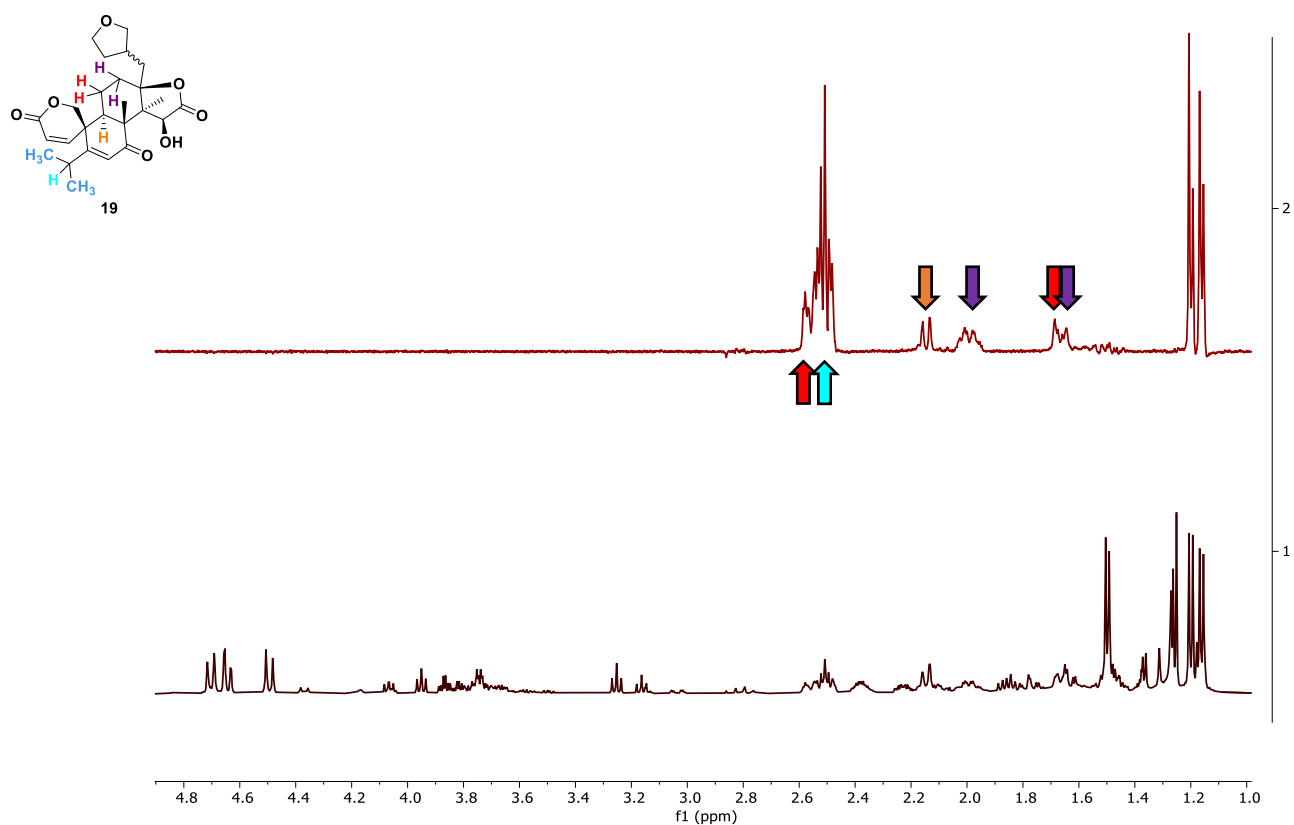**<sup>1</sup>H-<sup>1</sup>H 1D TOCSY NMR (one of the two diastereoisomers)**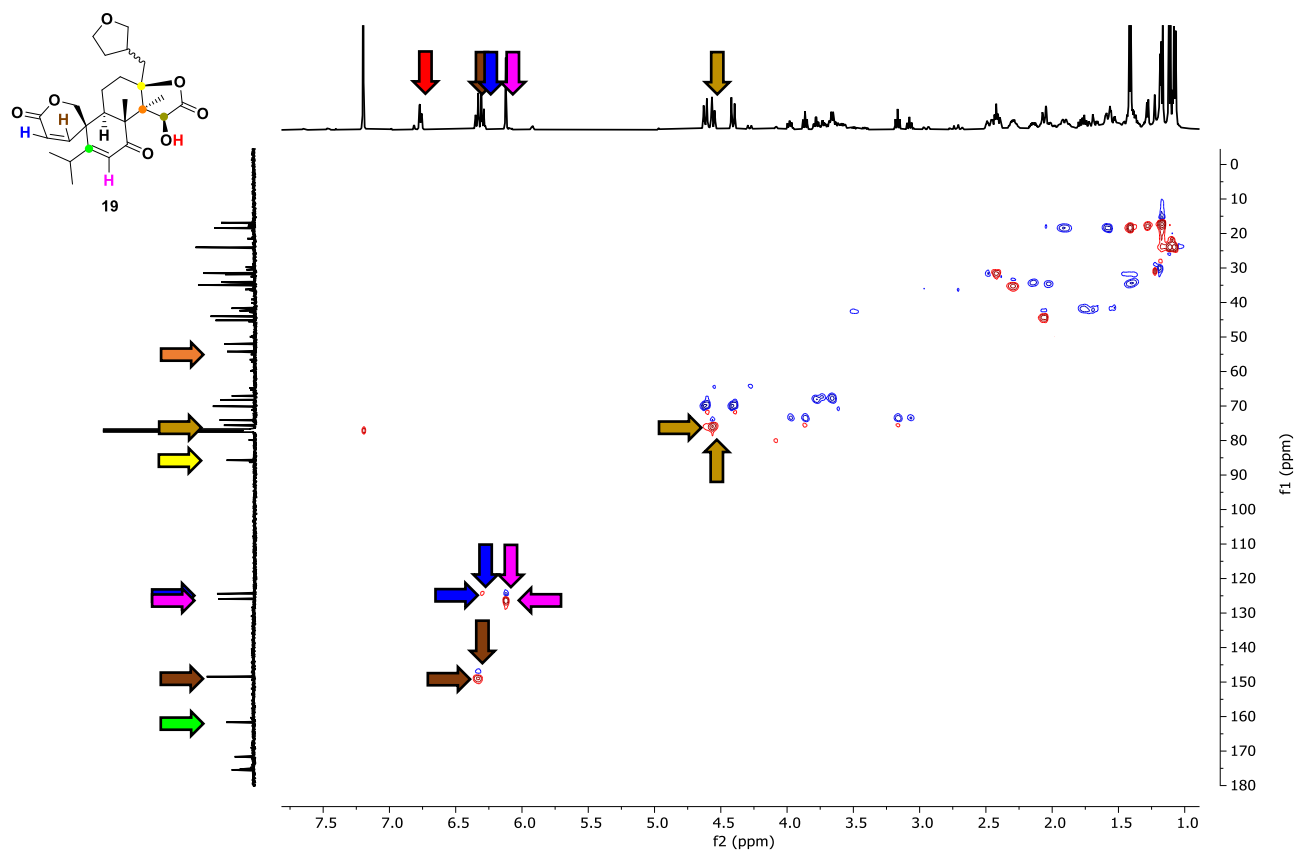**<sup>1</sup>H-<sup>13</sup>C HSQC NMR**

## SUPPORTING INFORMATION

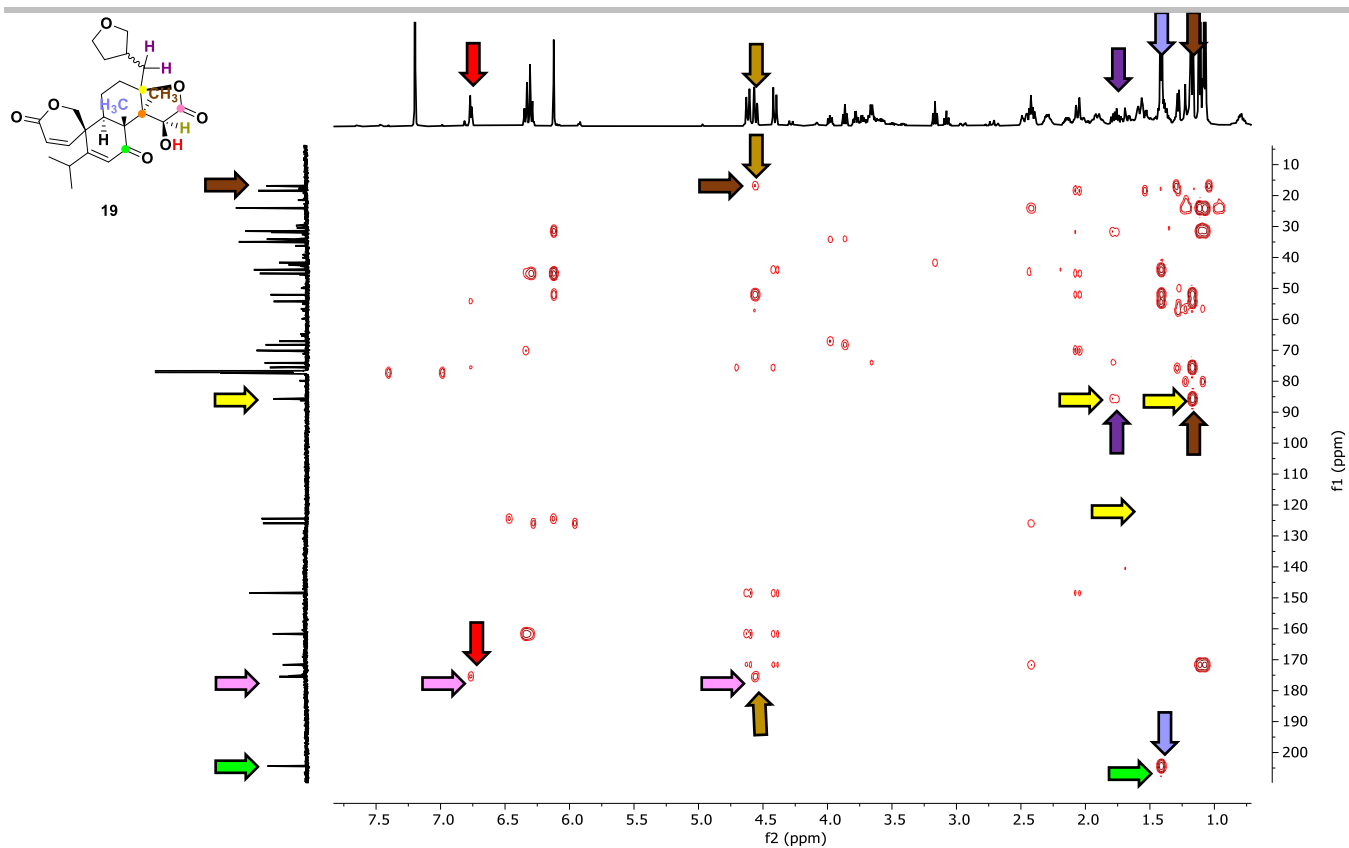

## SUPPORTING INFORMATION

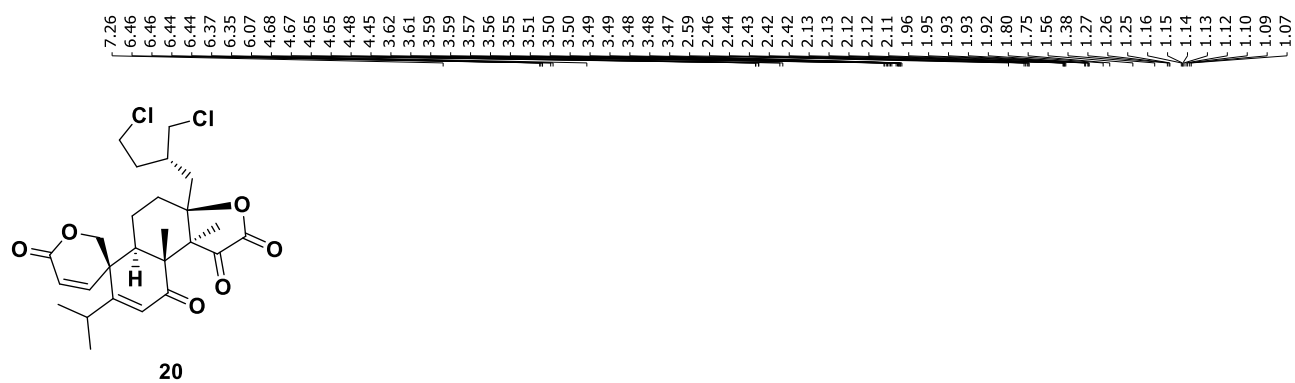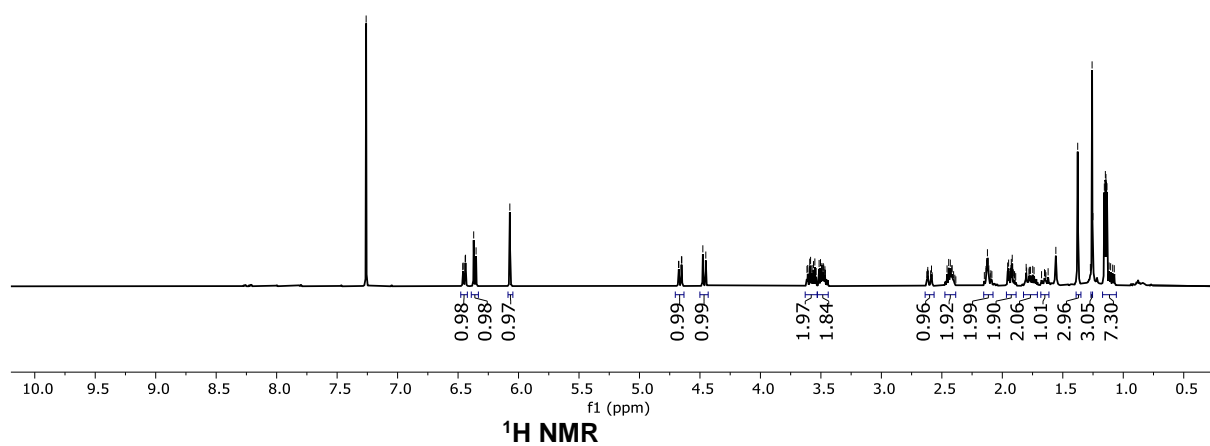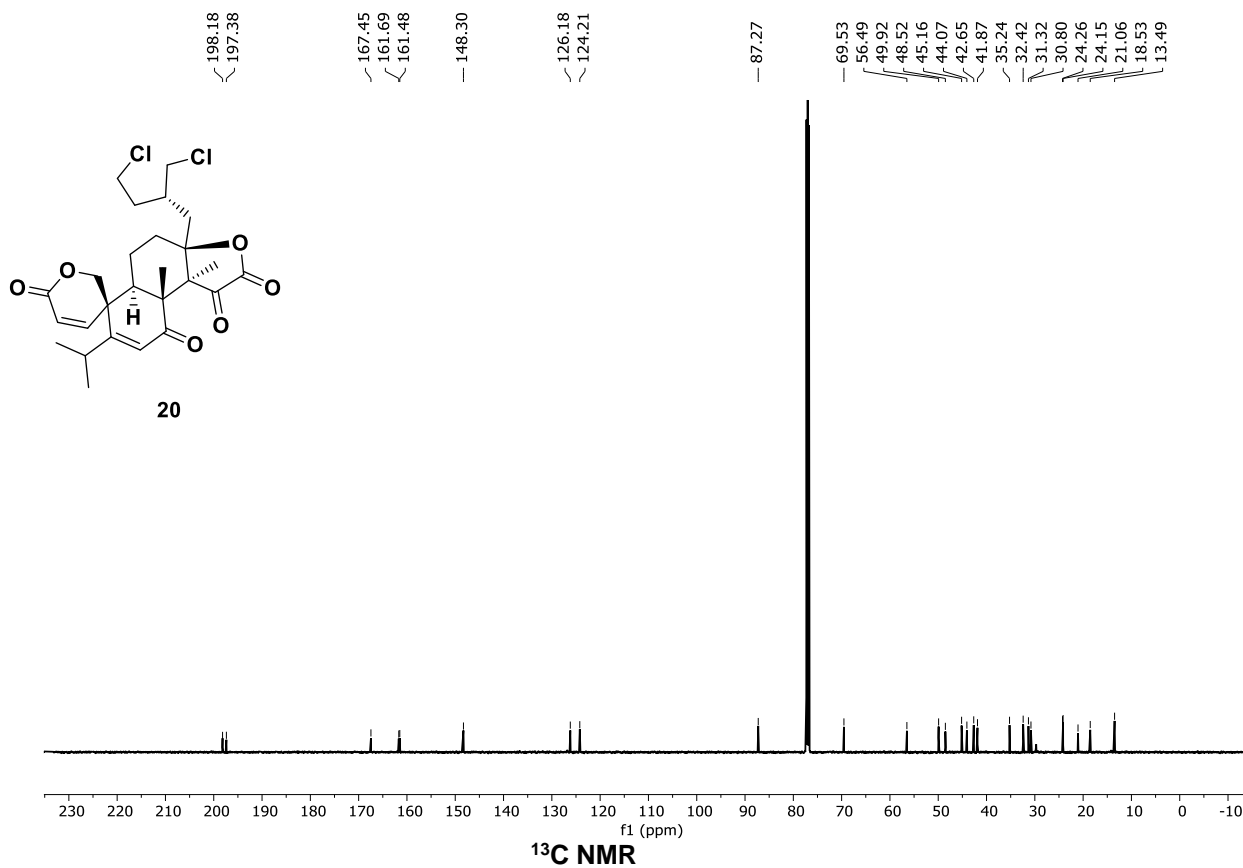



## SUPPORTING INFORMATION

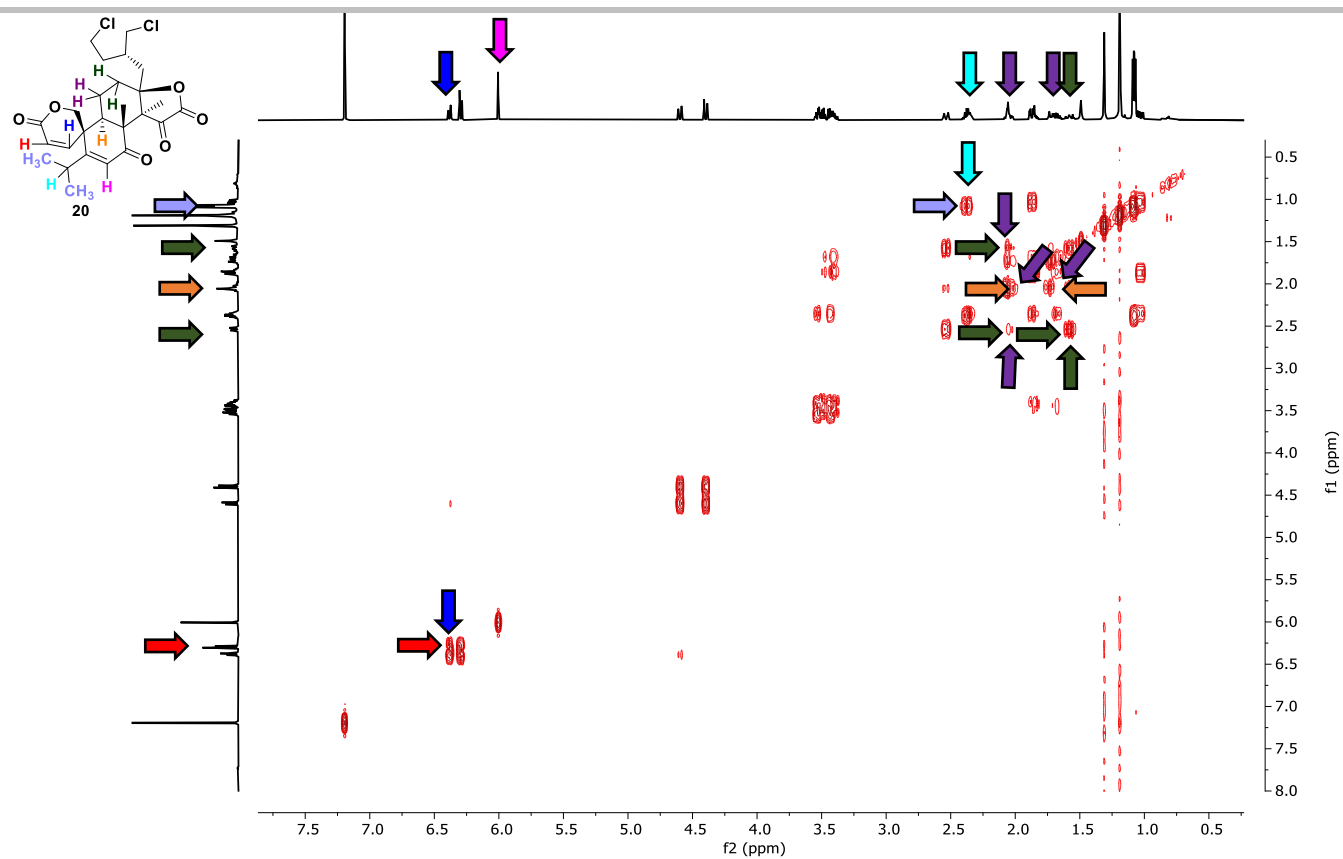**<sup>1</sup>H-<sup>1</sup>H COSY NMR**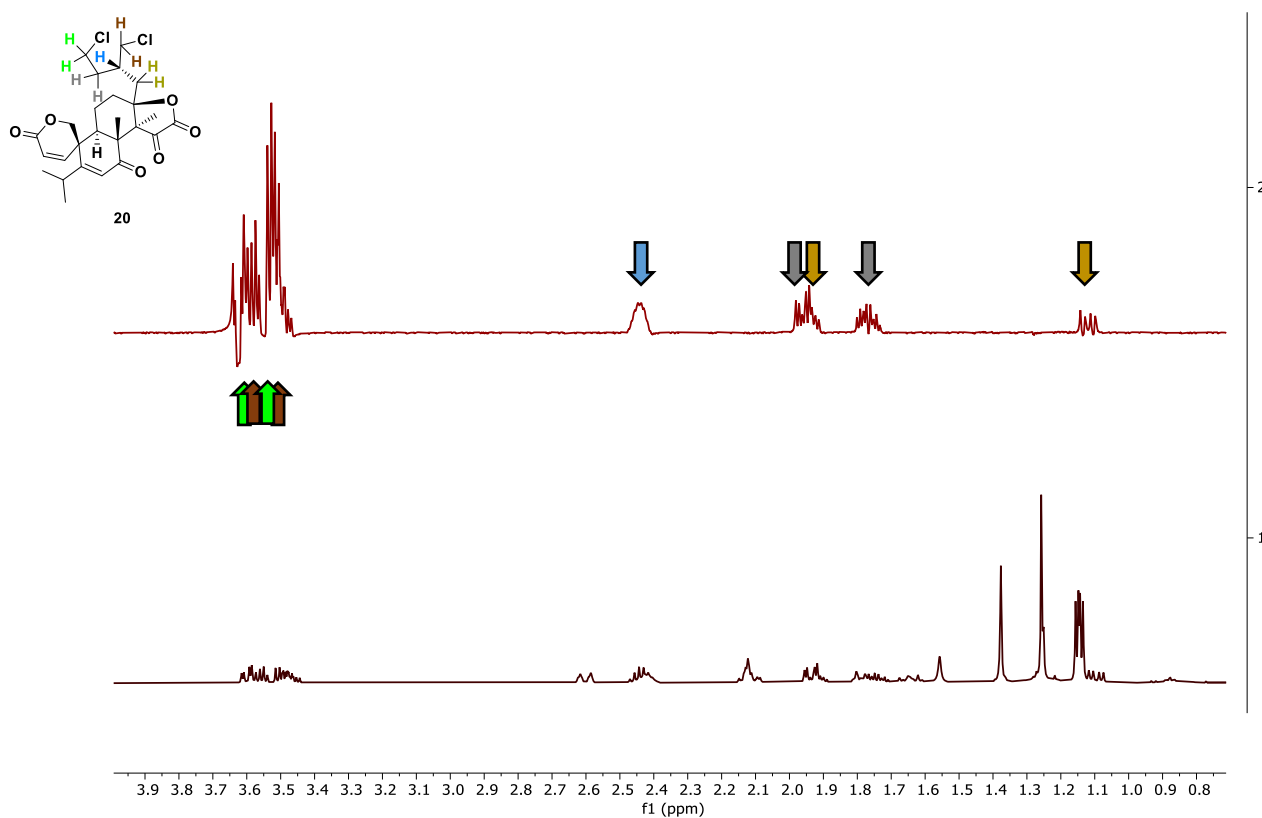**<sup>1</sup>H-<sup>1</sup>H 1D TOCSY NMR**

## SUPPORTING INFORMATION

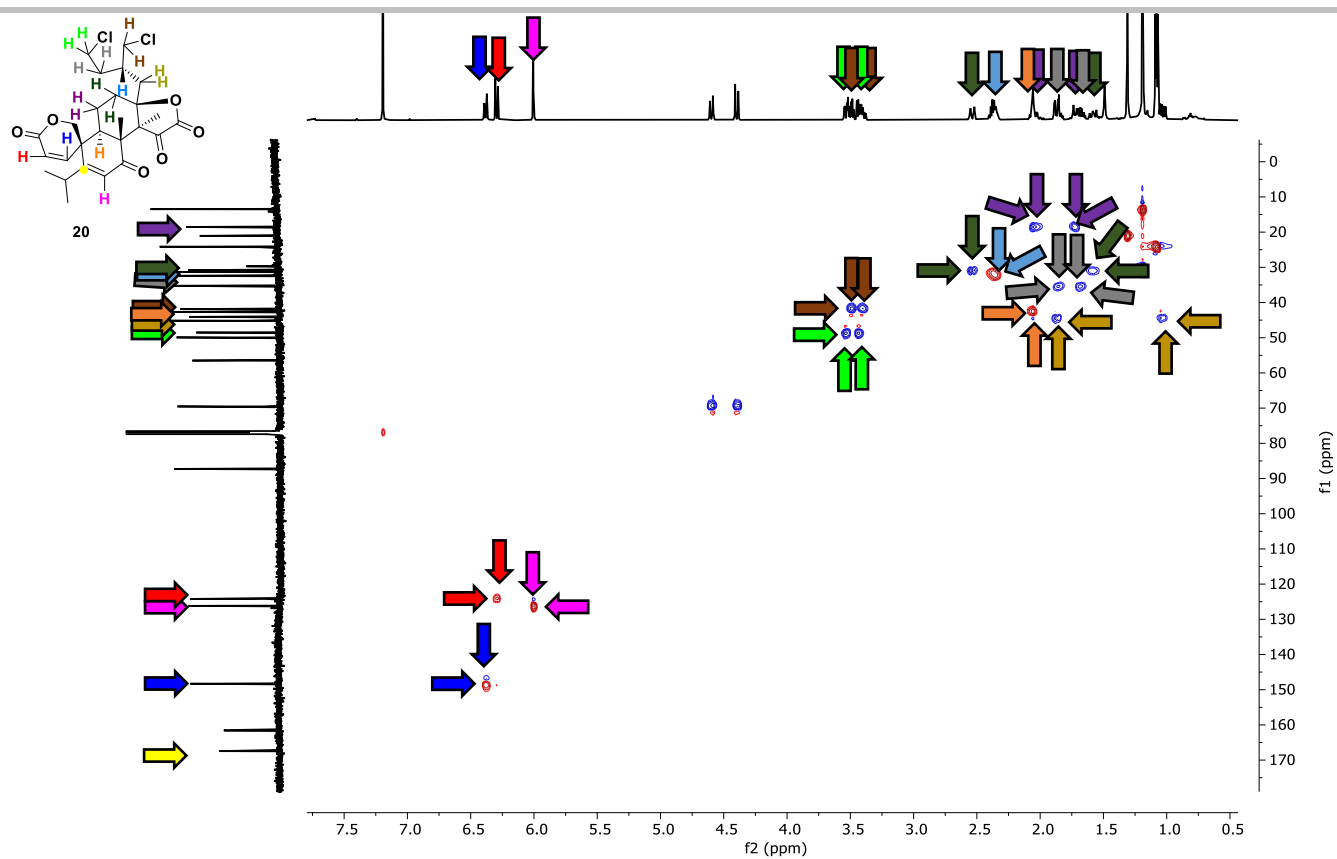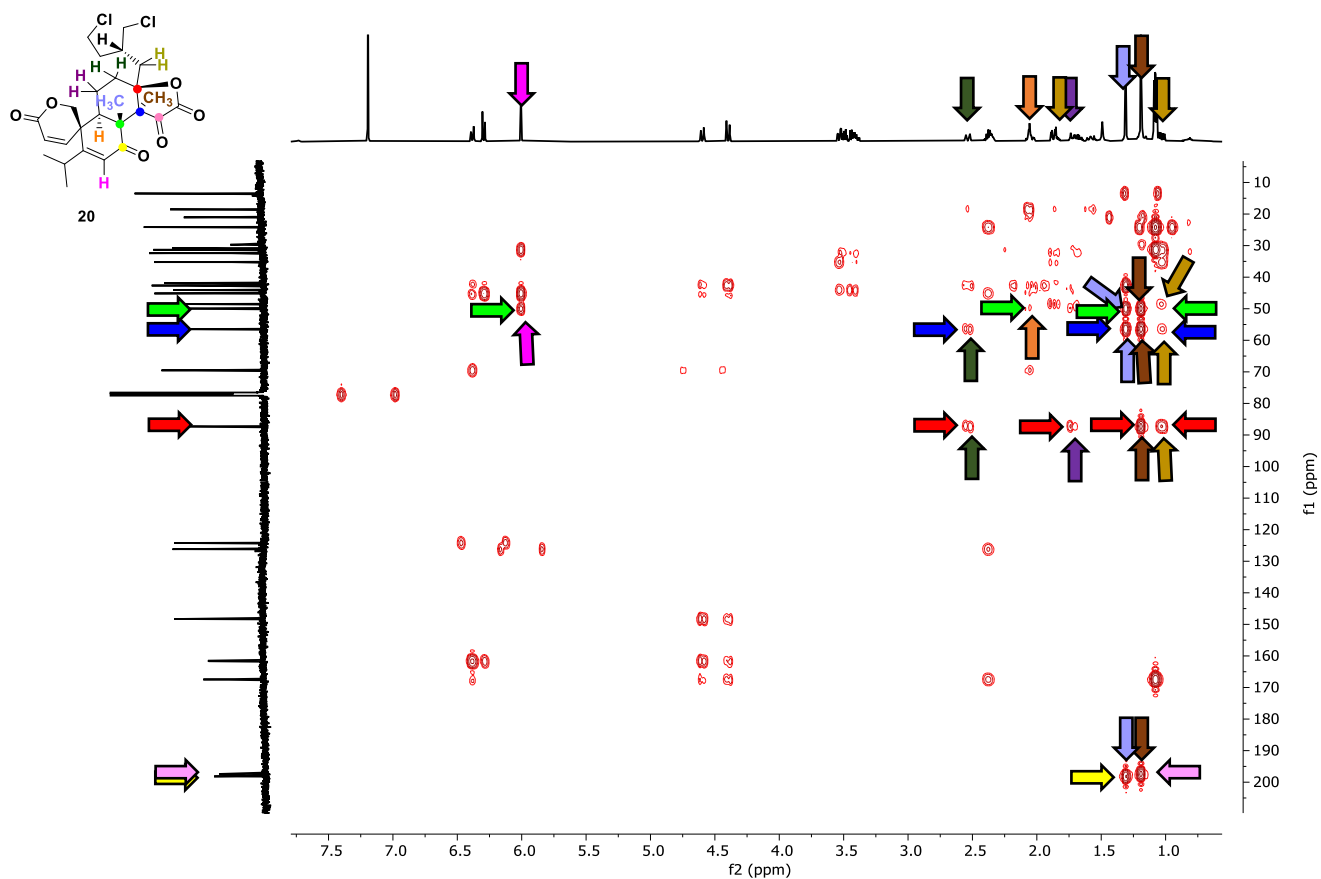**<sup>1</sup>H-<sup>13</sup>C HMBC NMR**

## SUPPORTING INFORMATION

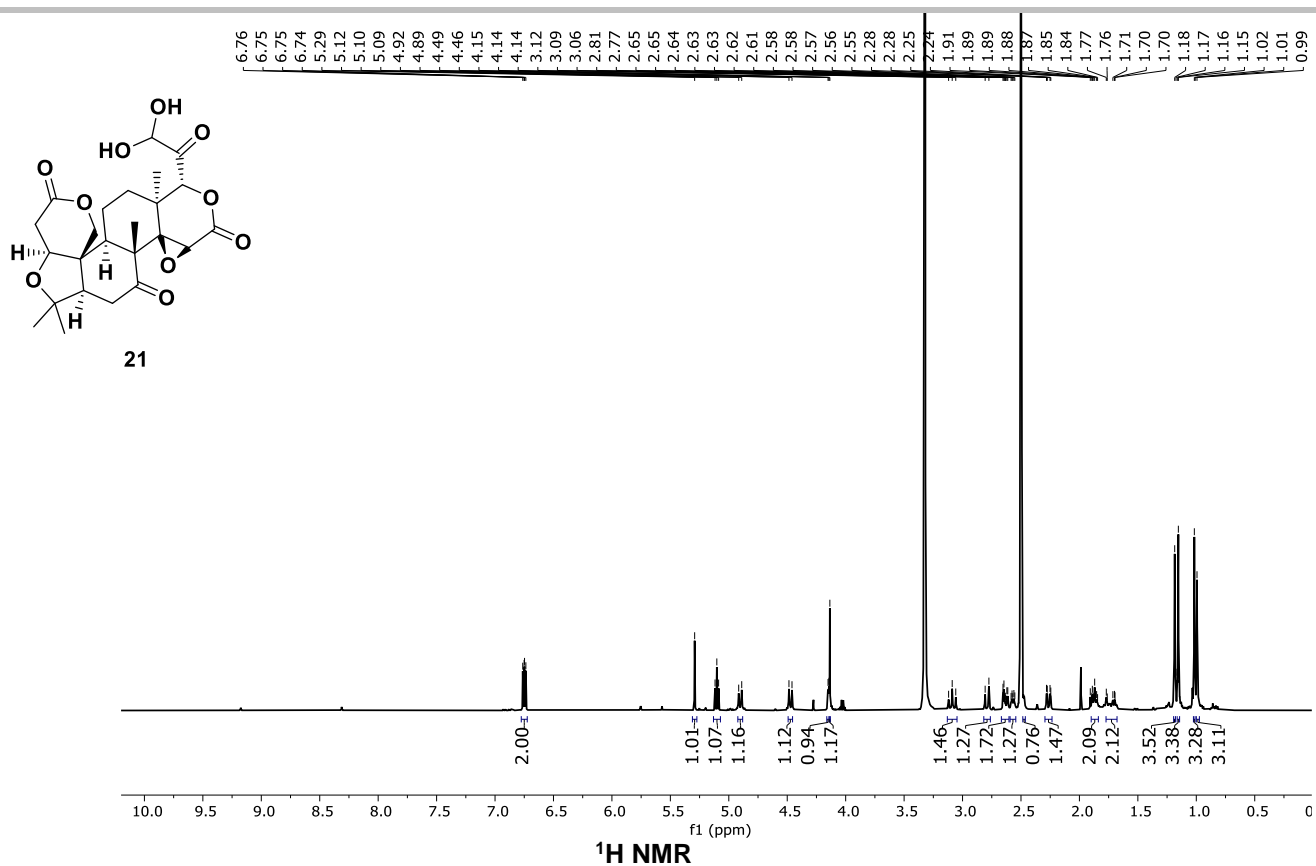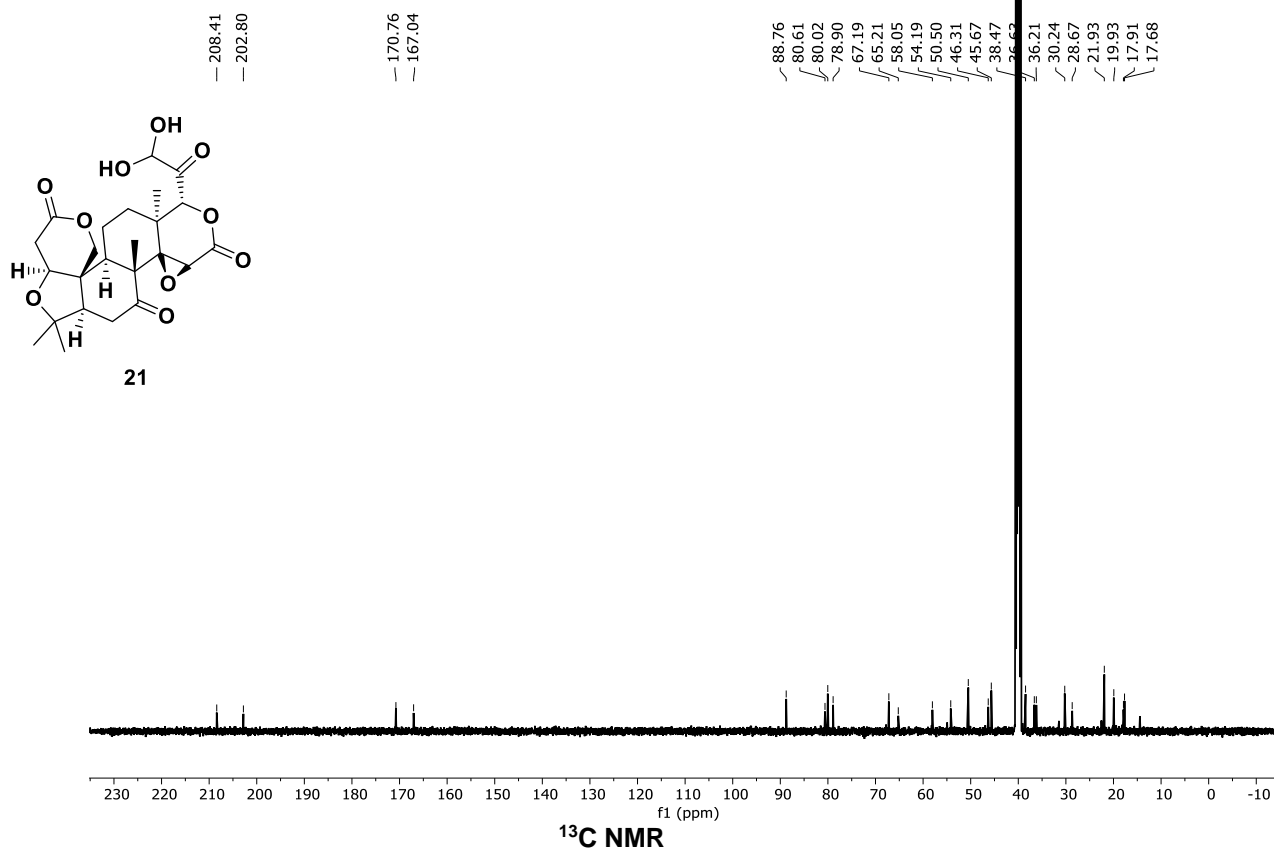

## SUPPORTING INFORMATION

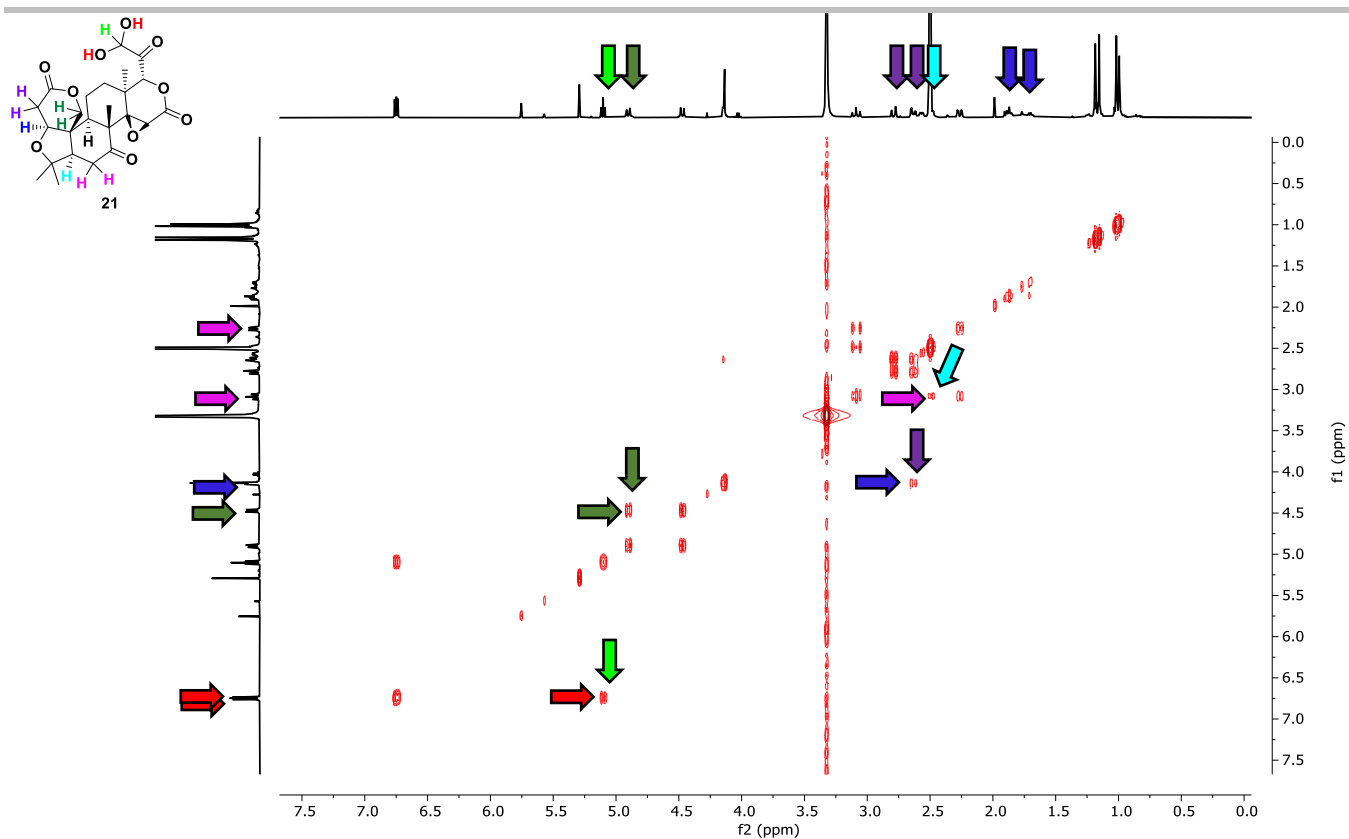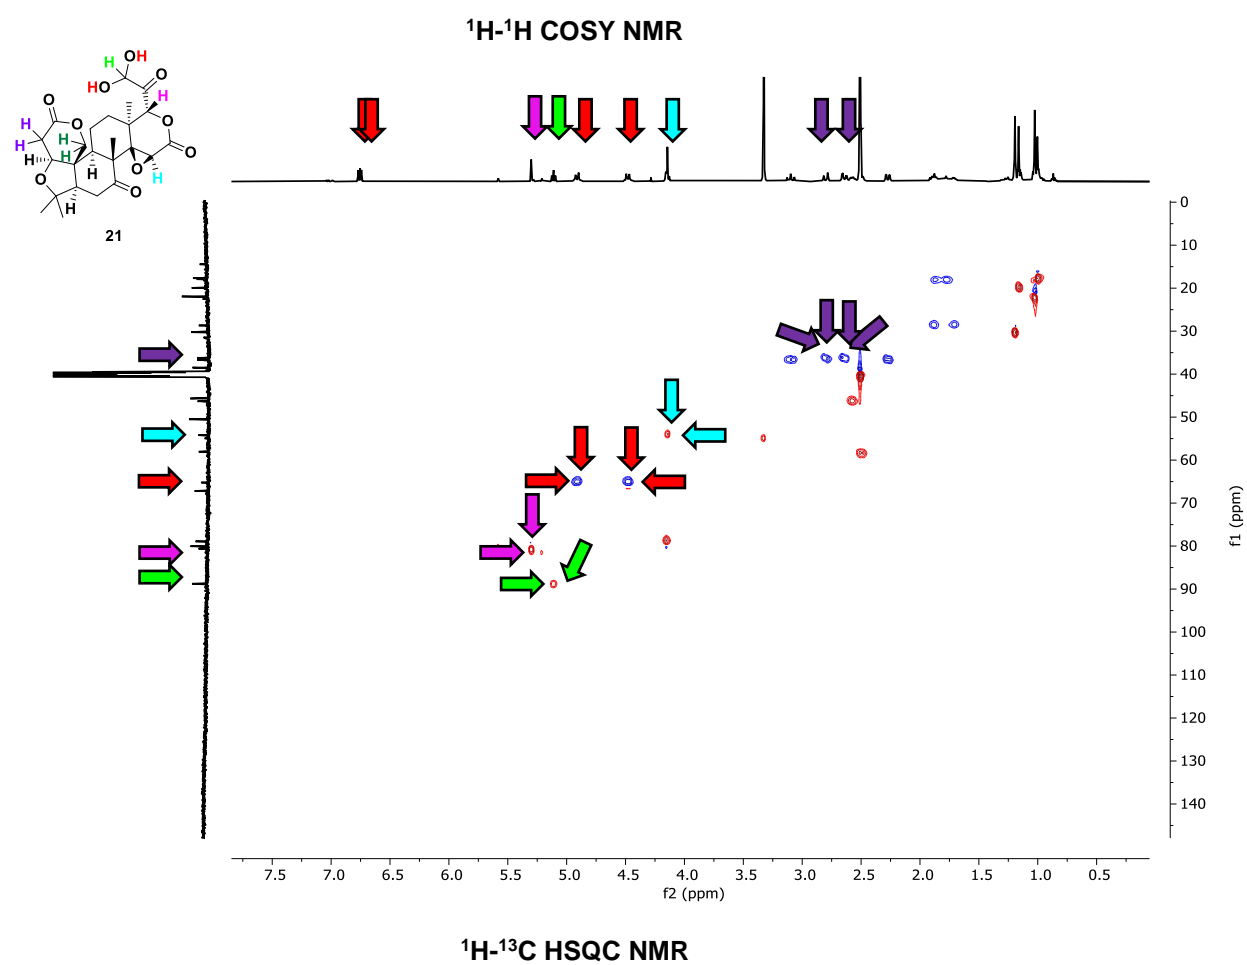

## SUPPORTING INFORMATION

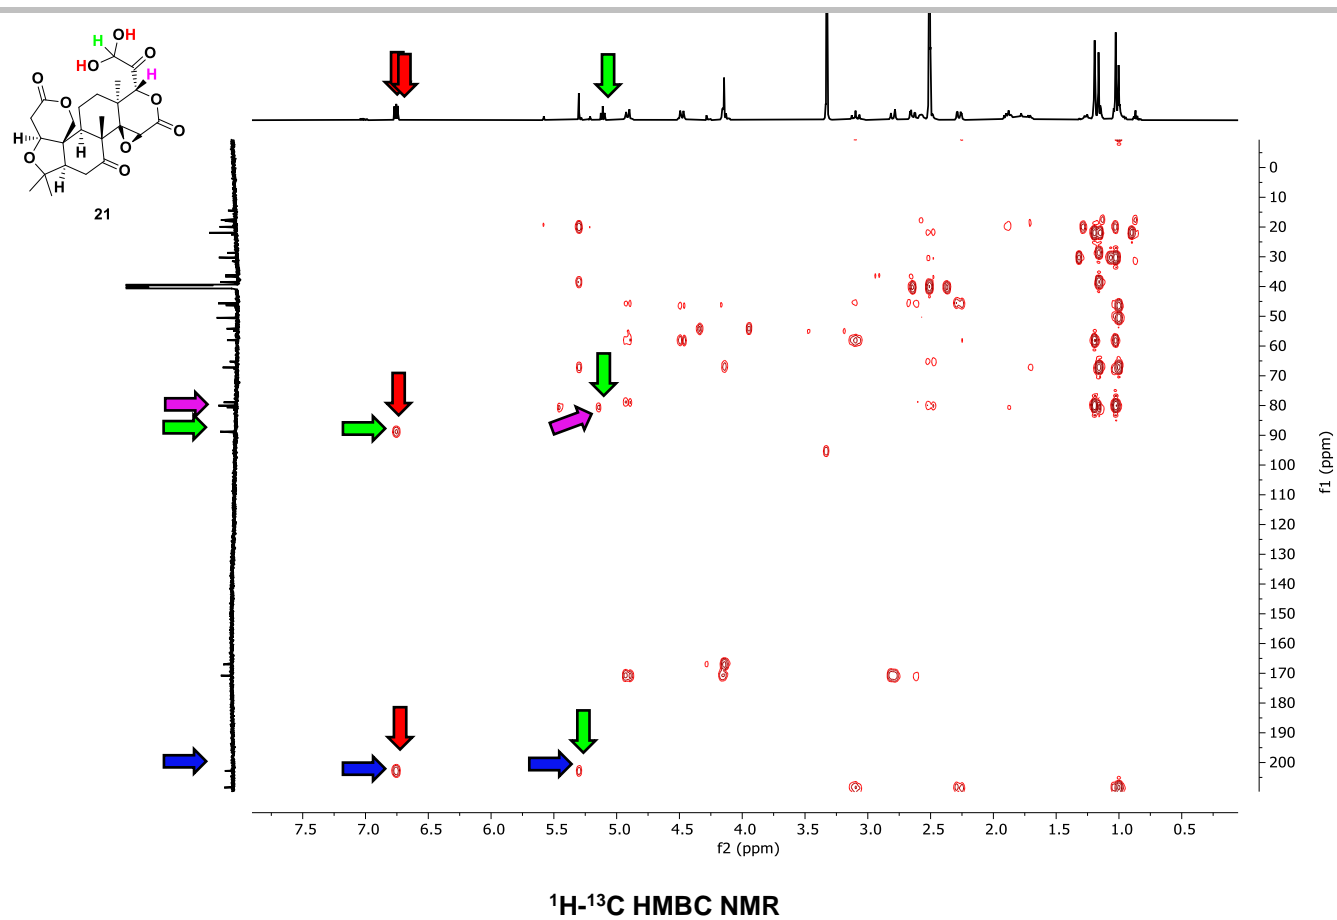

## SUPPORTING INFORMATION

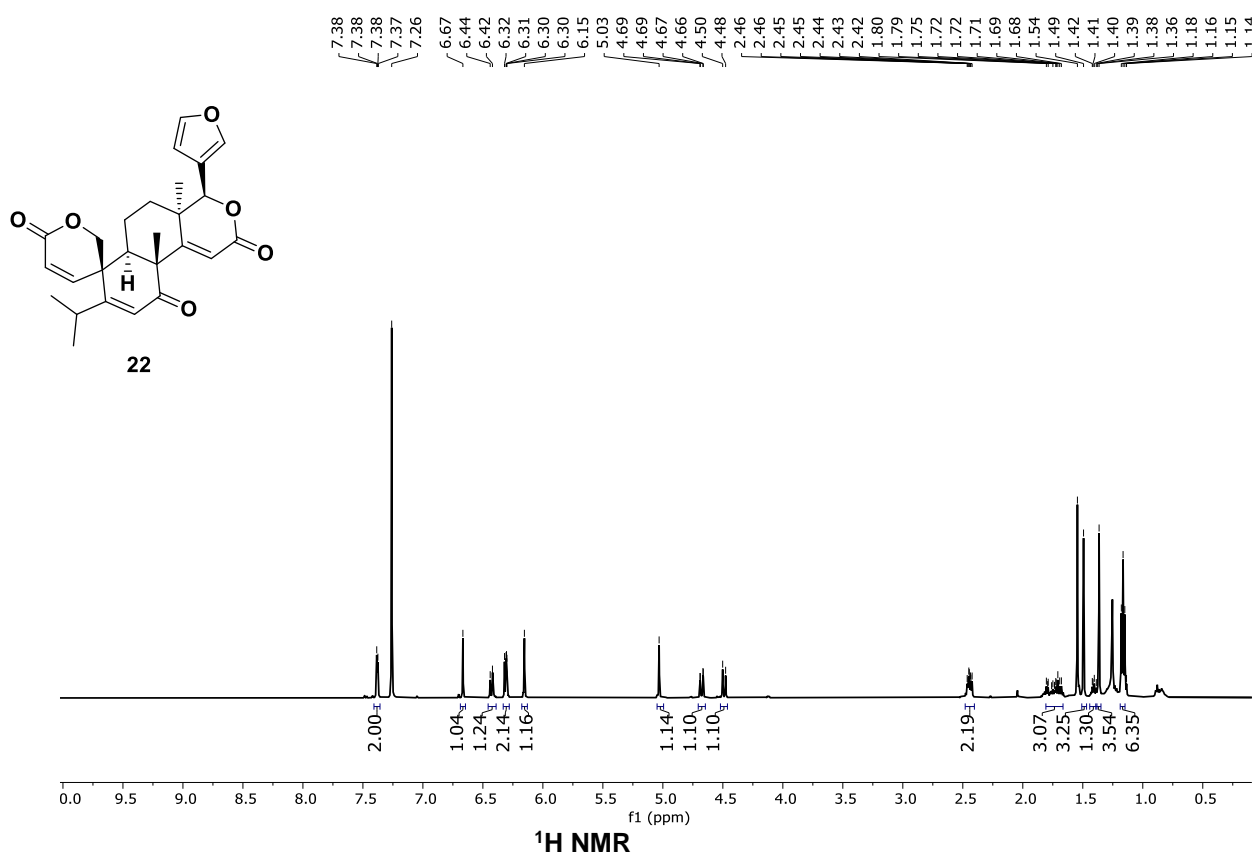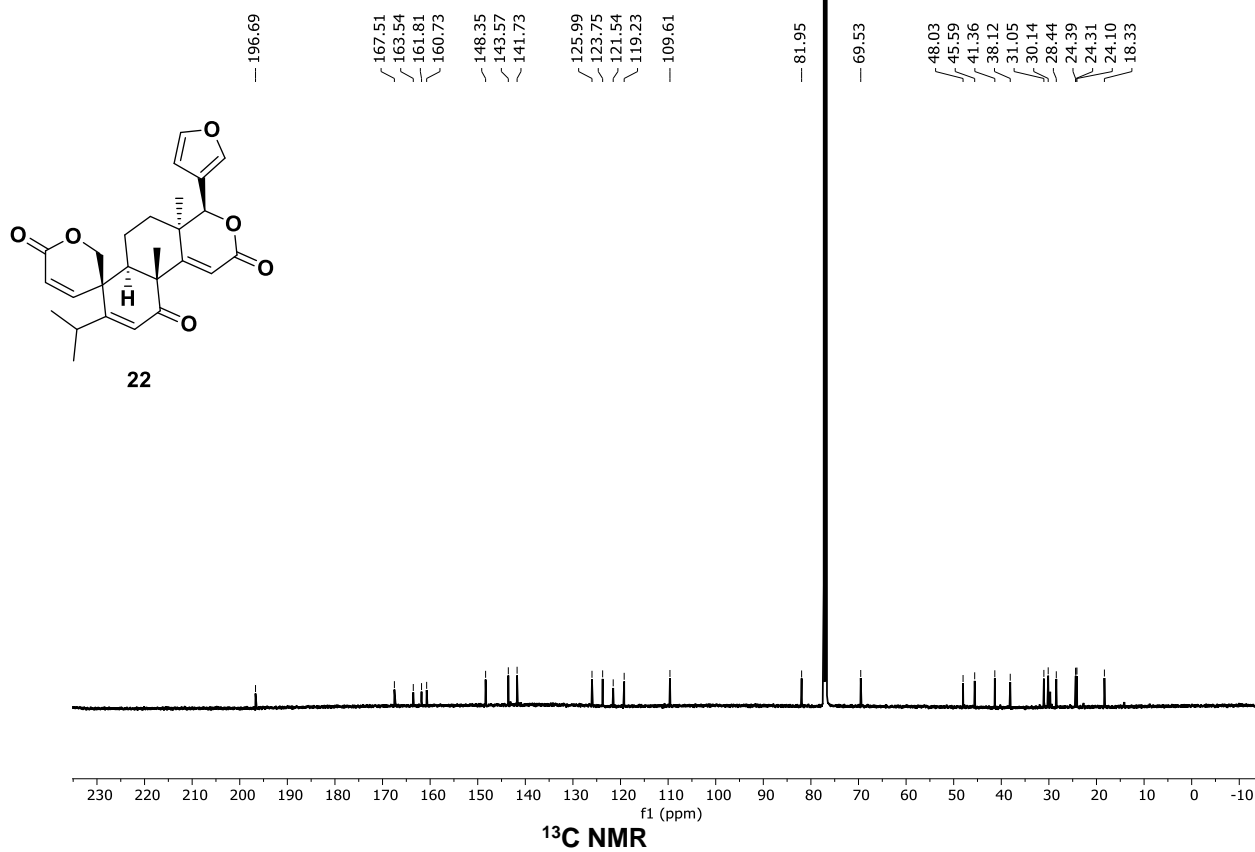



## SUPPORTING INFORMATION

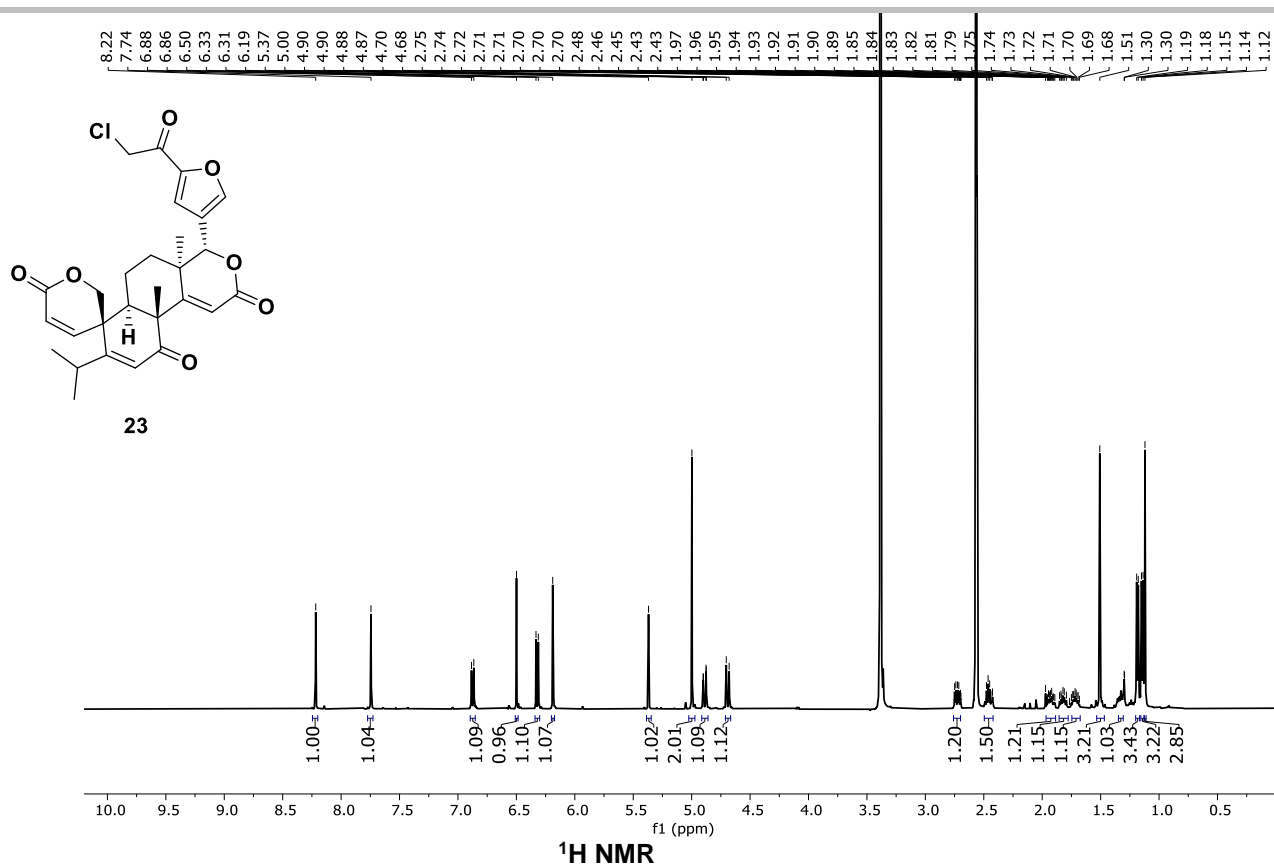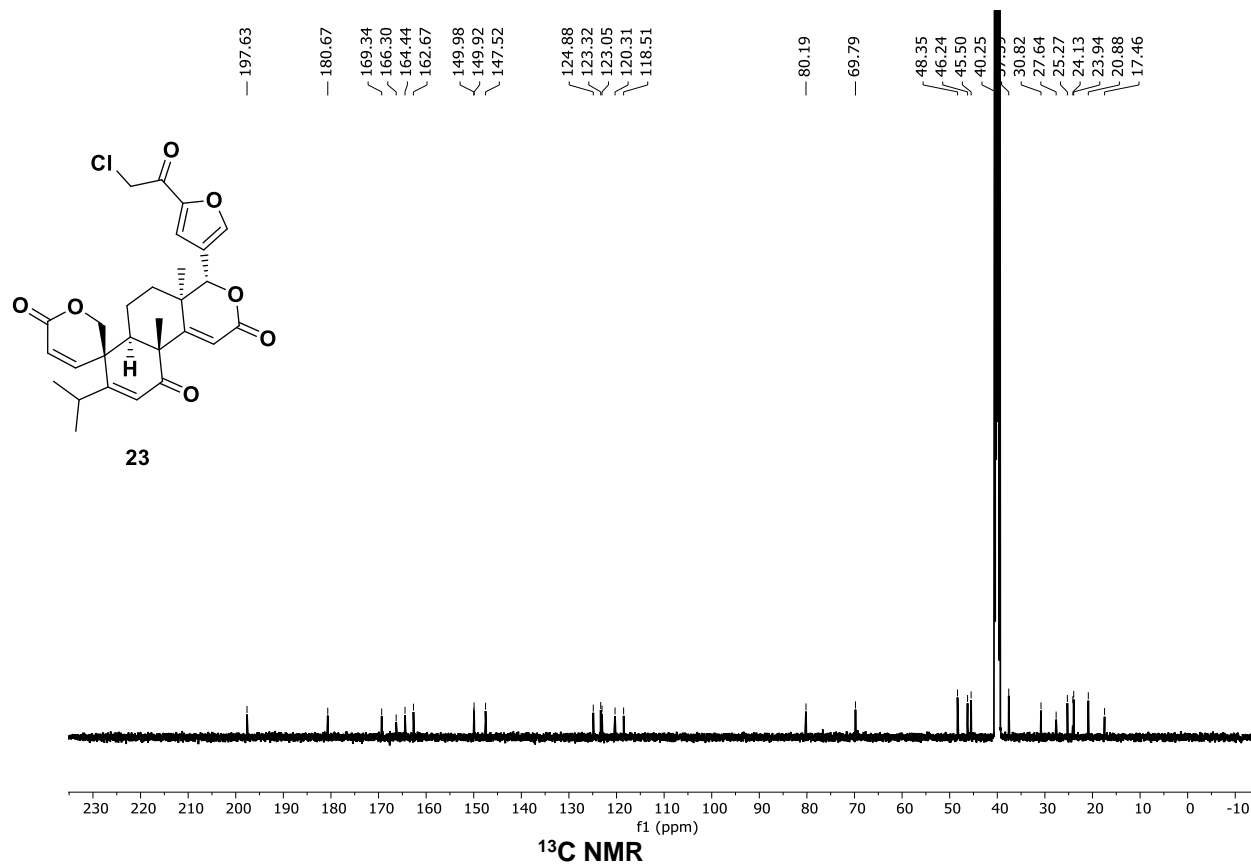



## SUPPORTING INFORMATION

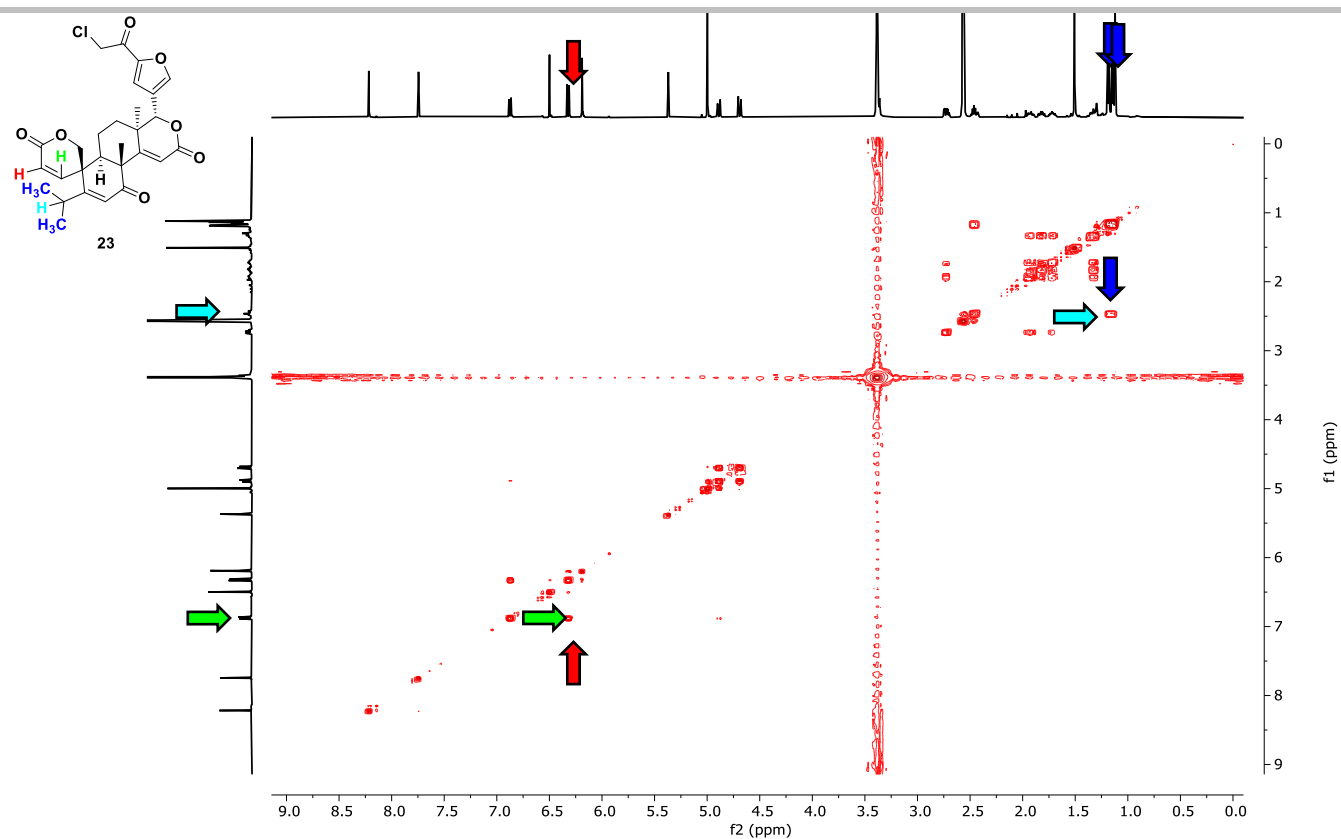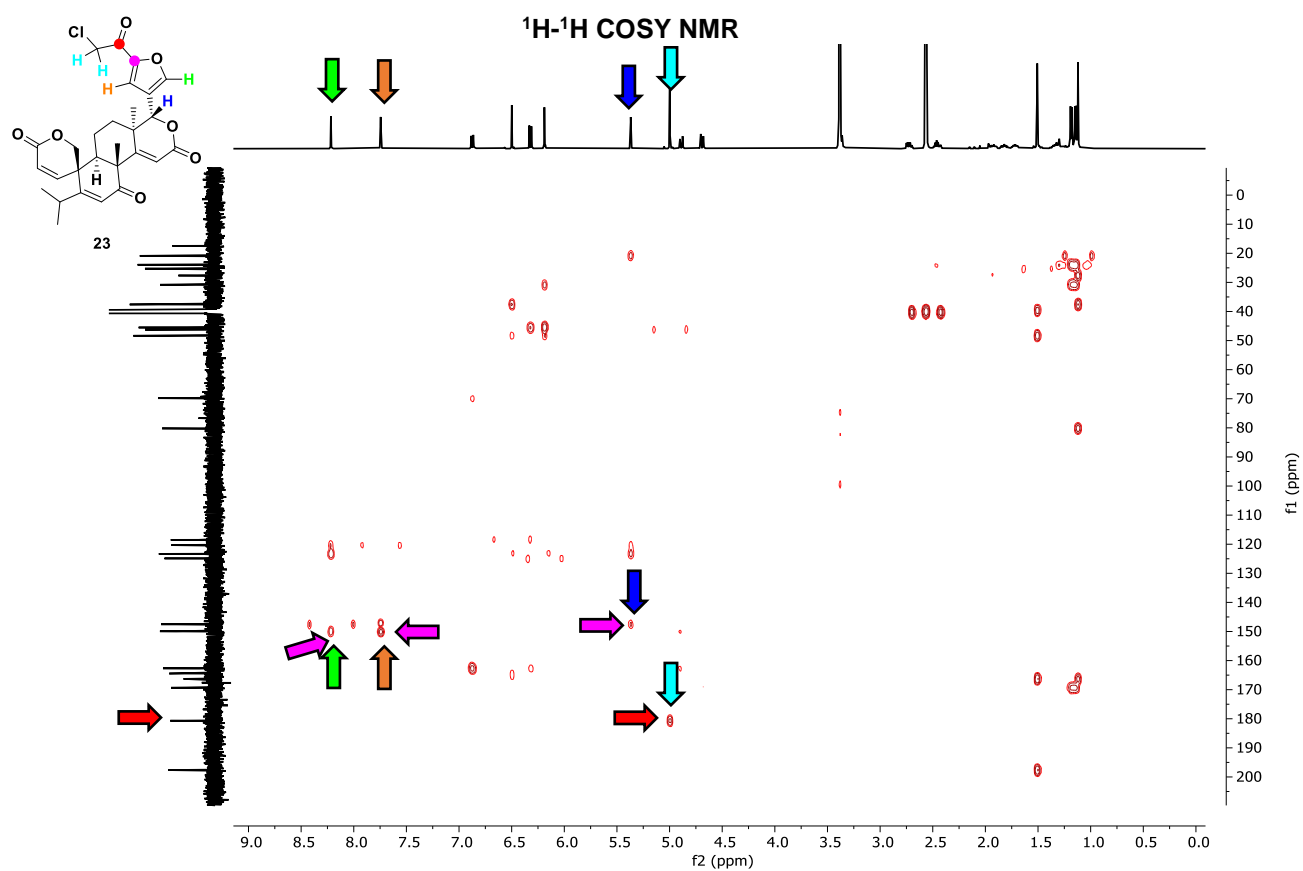

## SUPPORTING INFORMATION

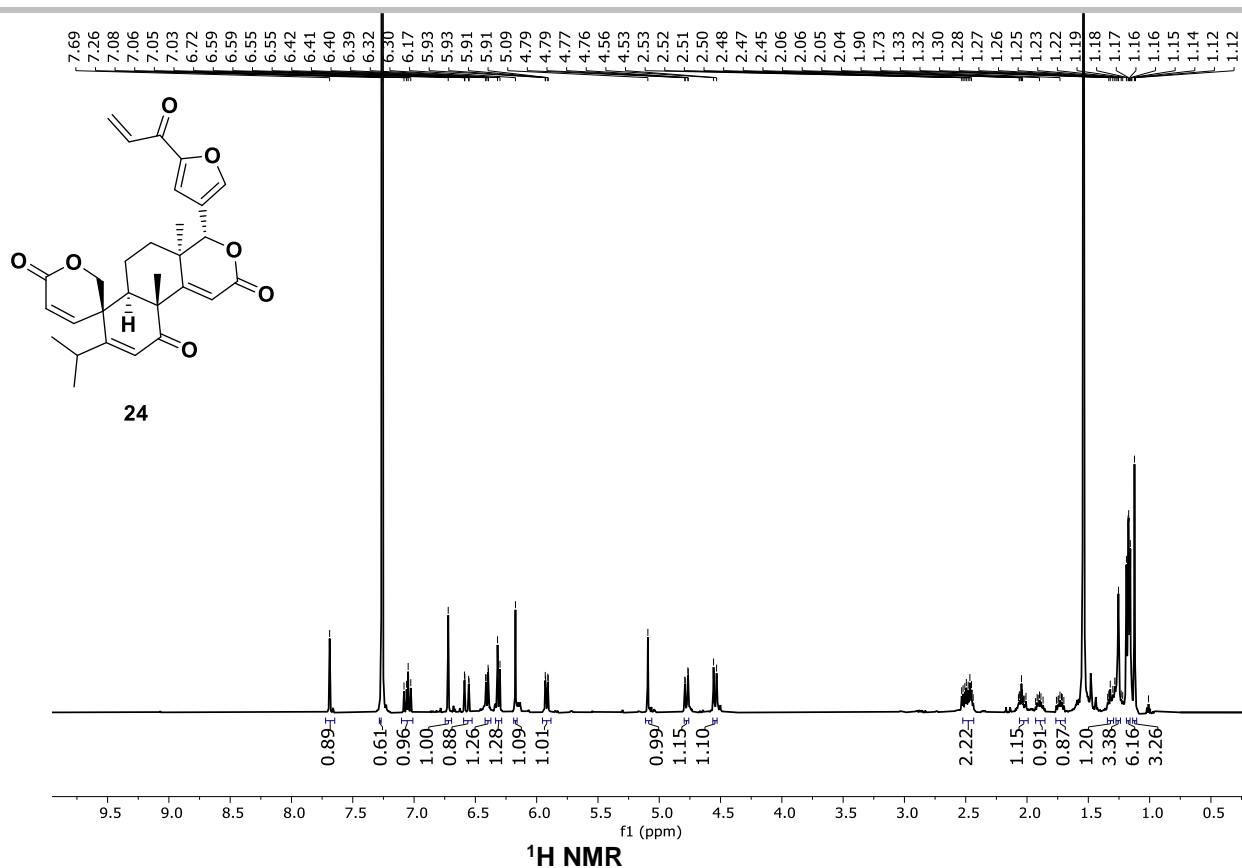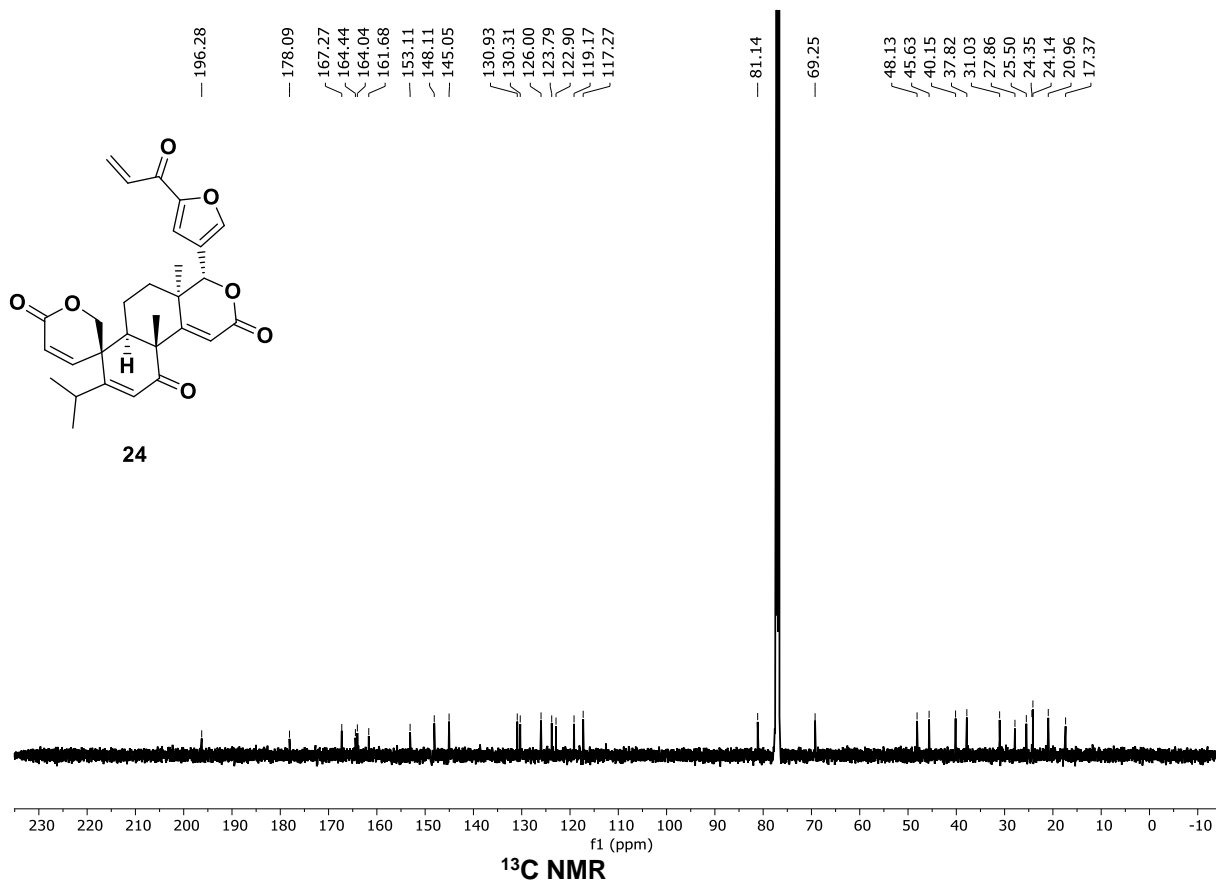

## SUPPORTING INFORMATION

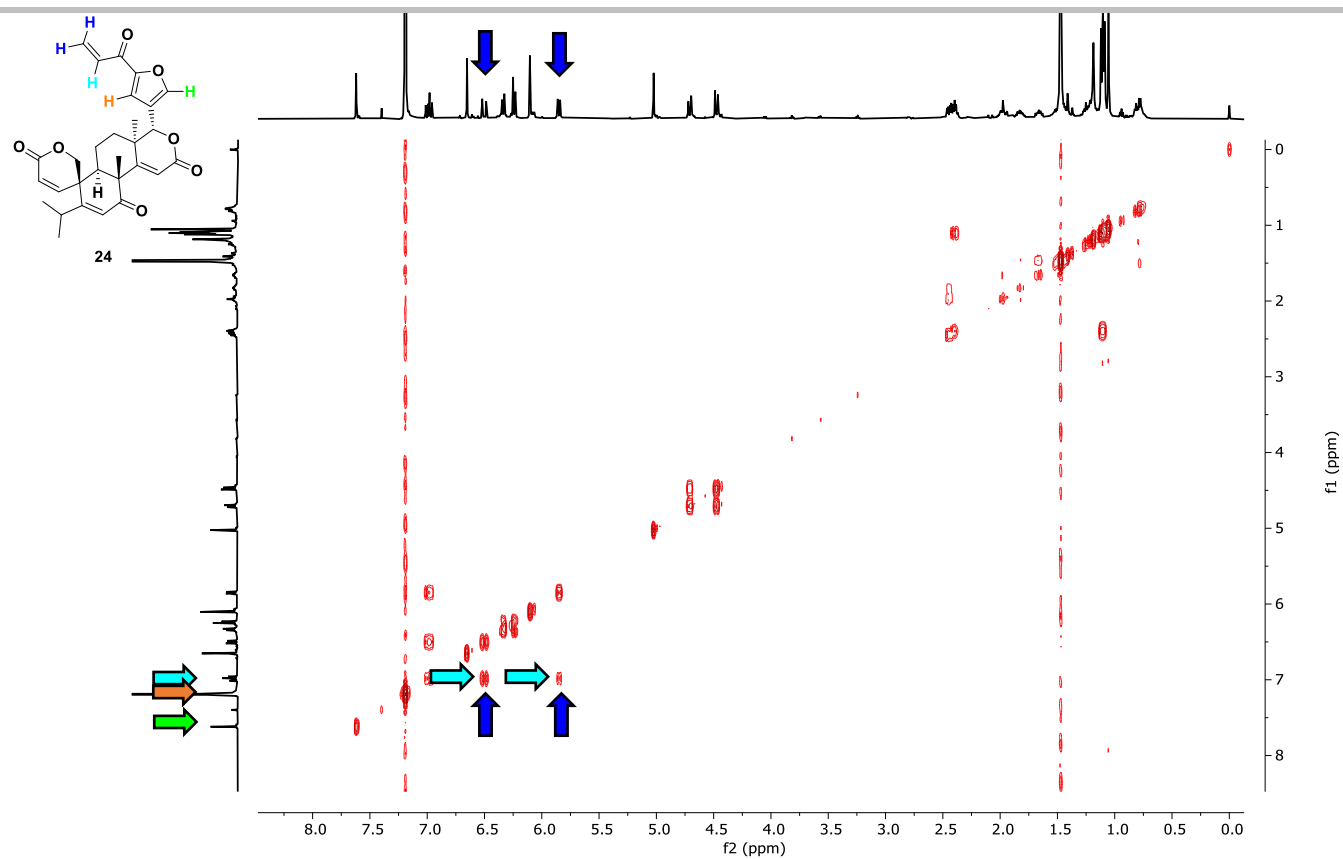 $^1\text{H}$ - $^1\text{H}$  COSY NMR

## SUPPORTING INFORMATION

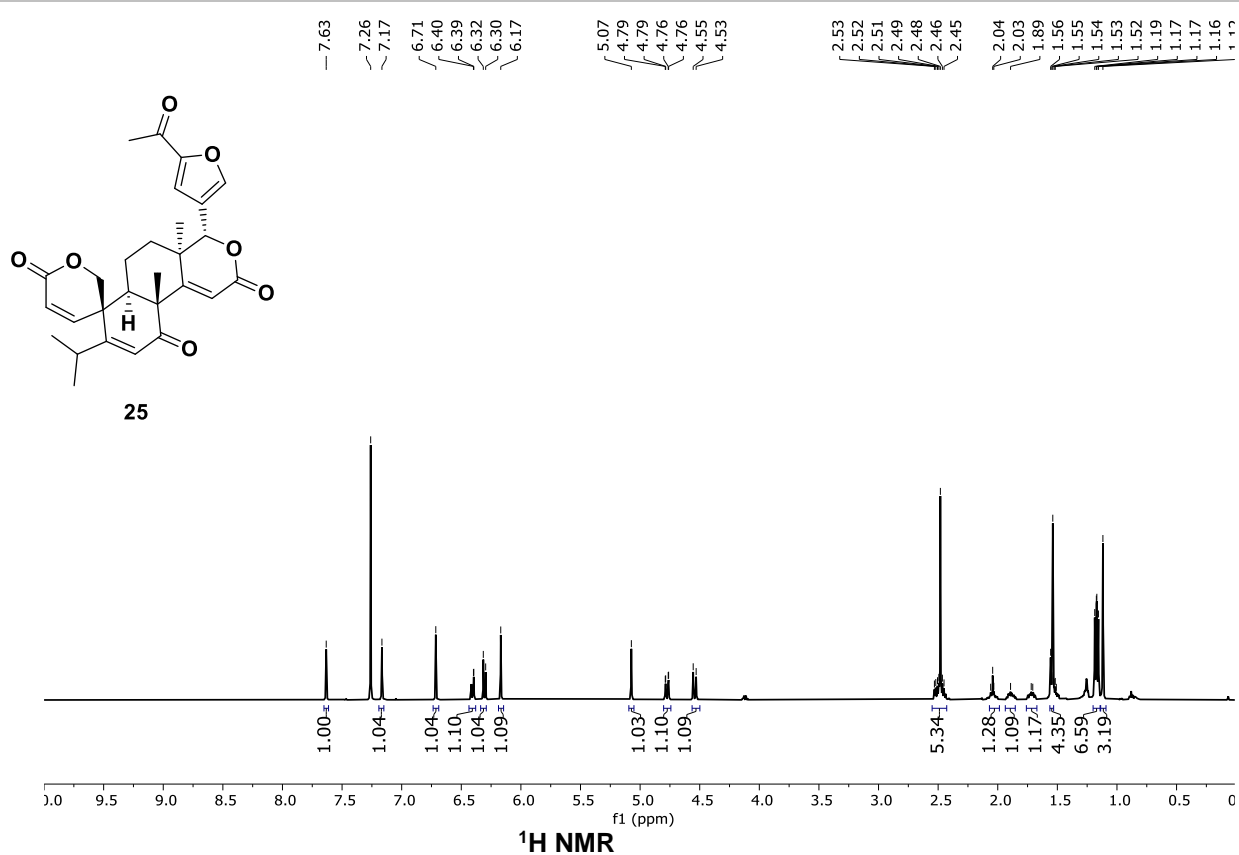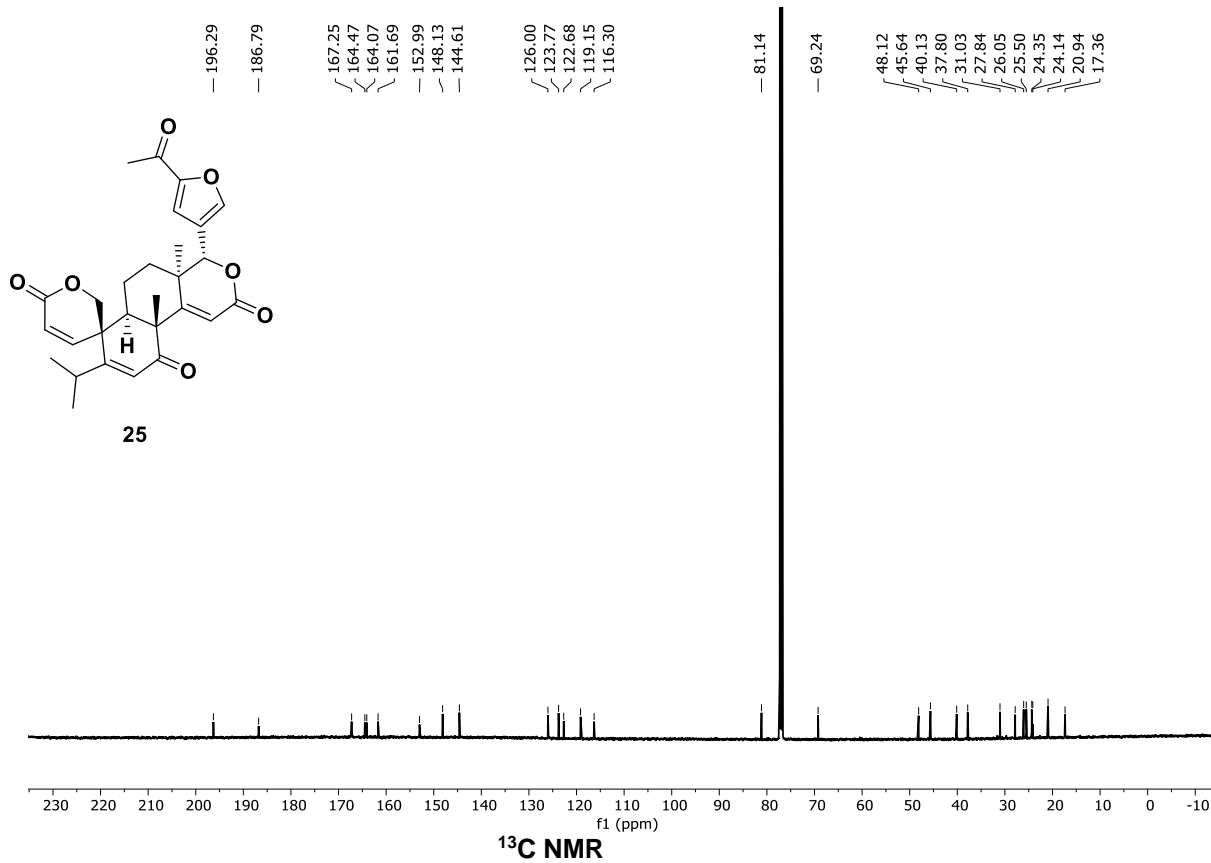

## SUPPORTING INFORMATION

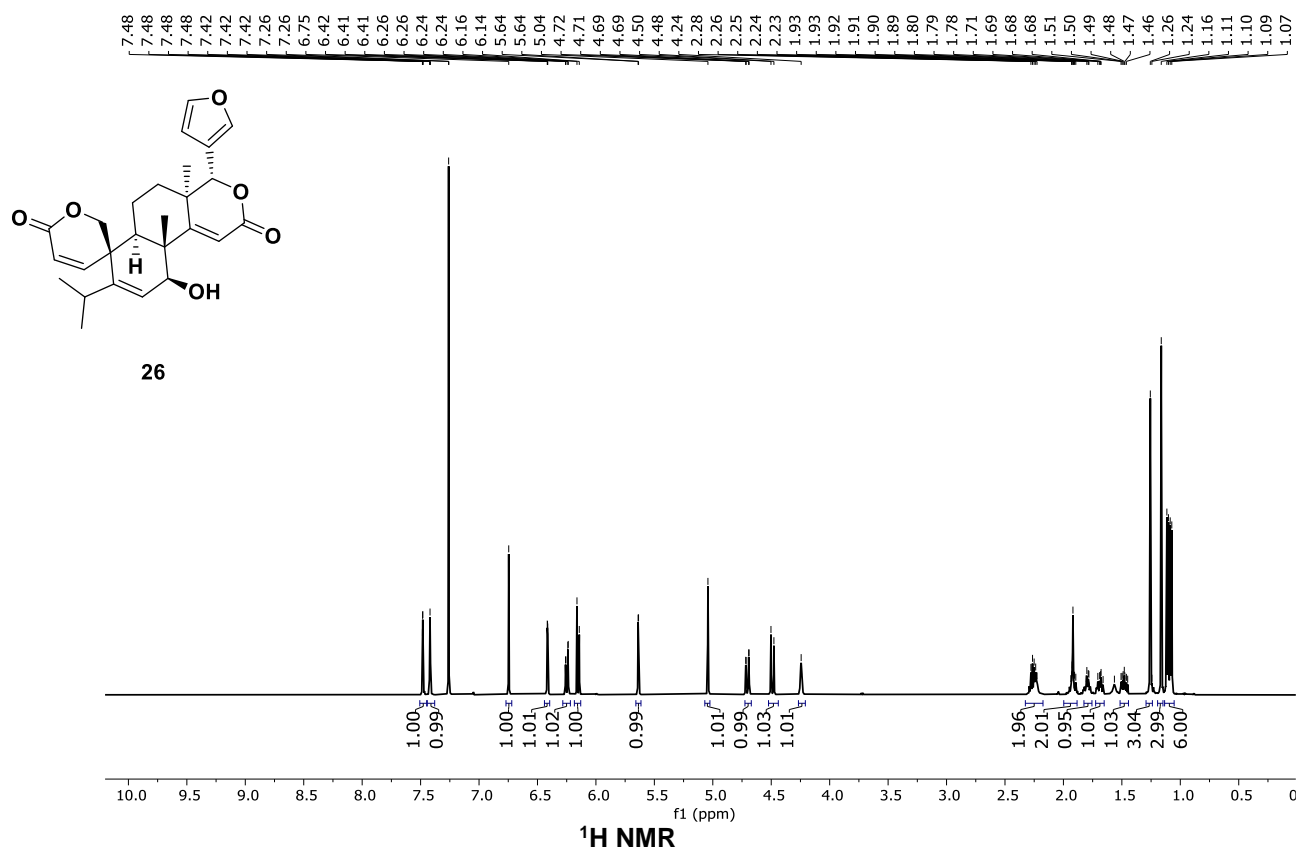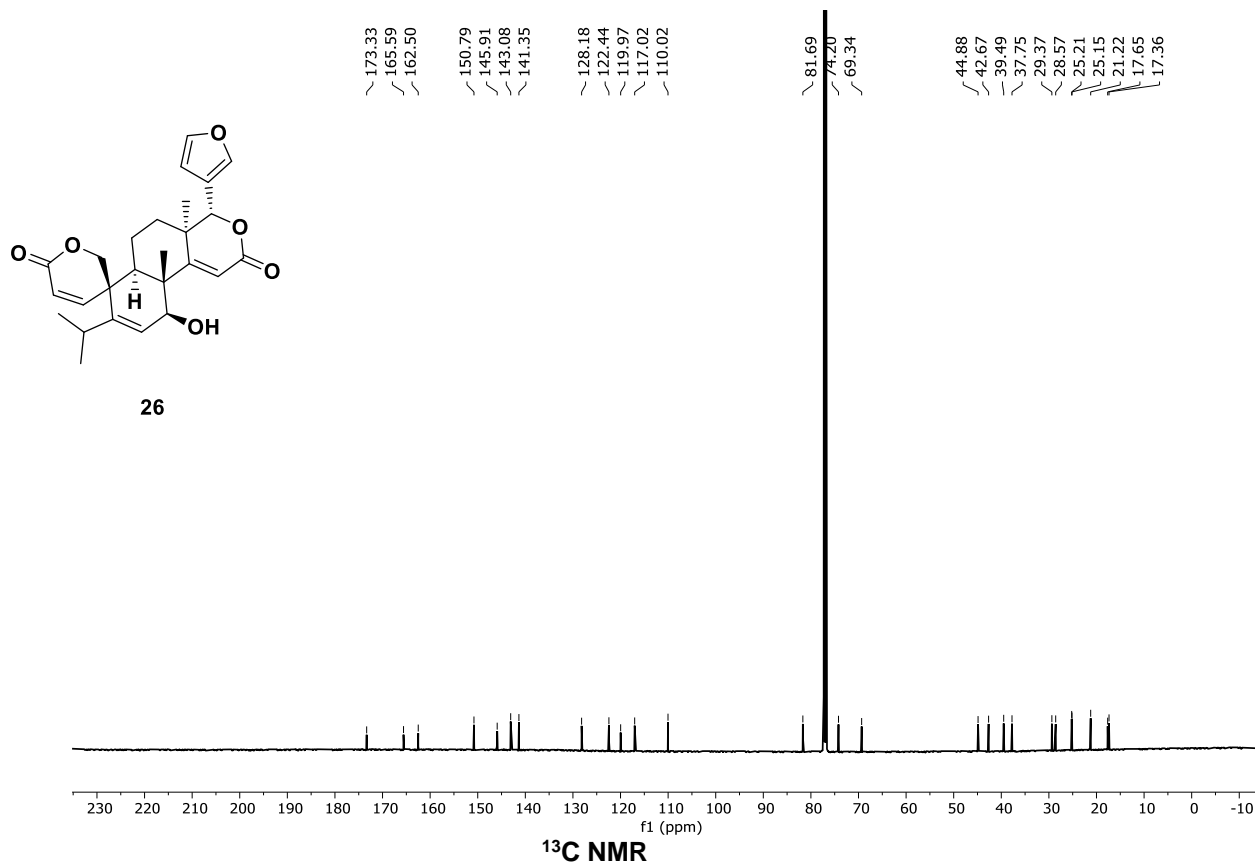

## SUPPORTING INFORMATION

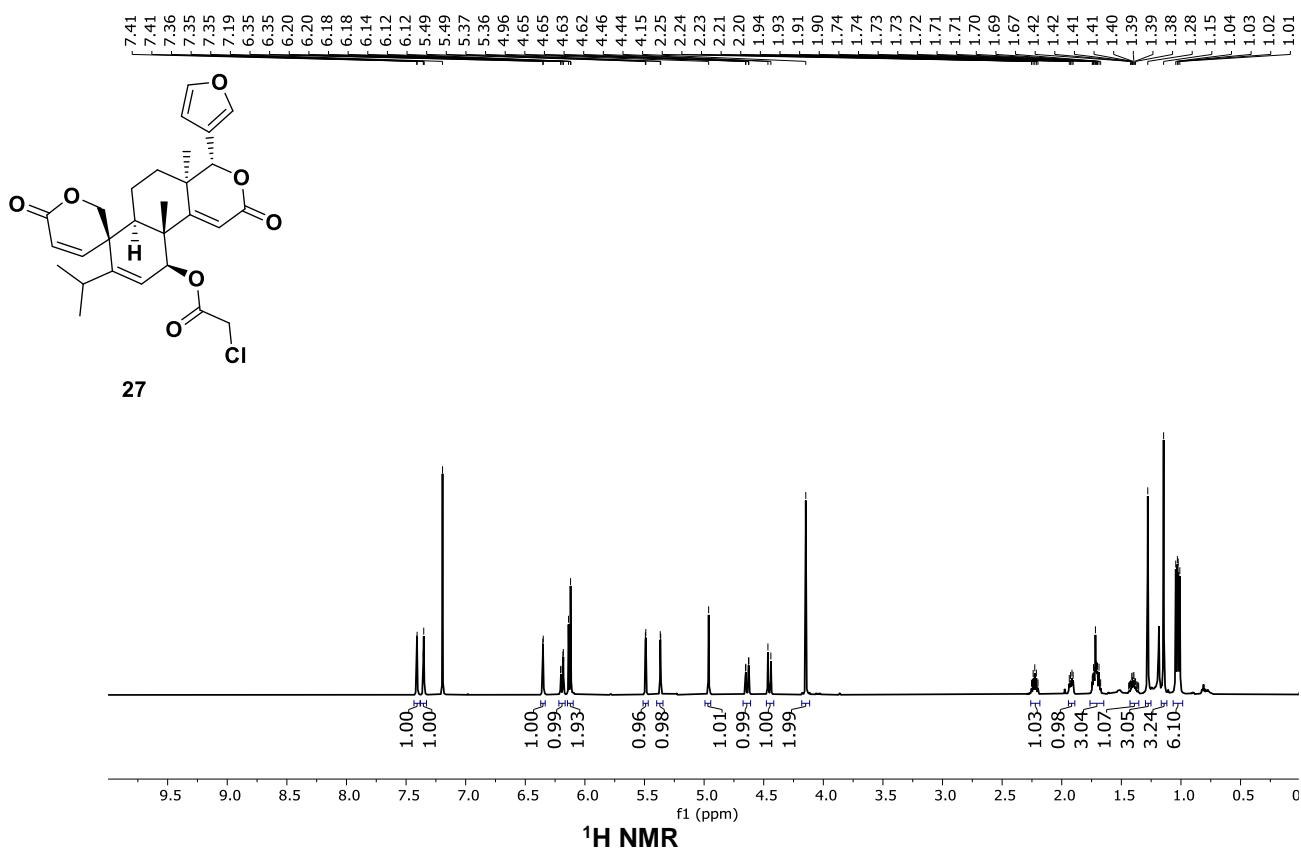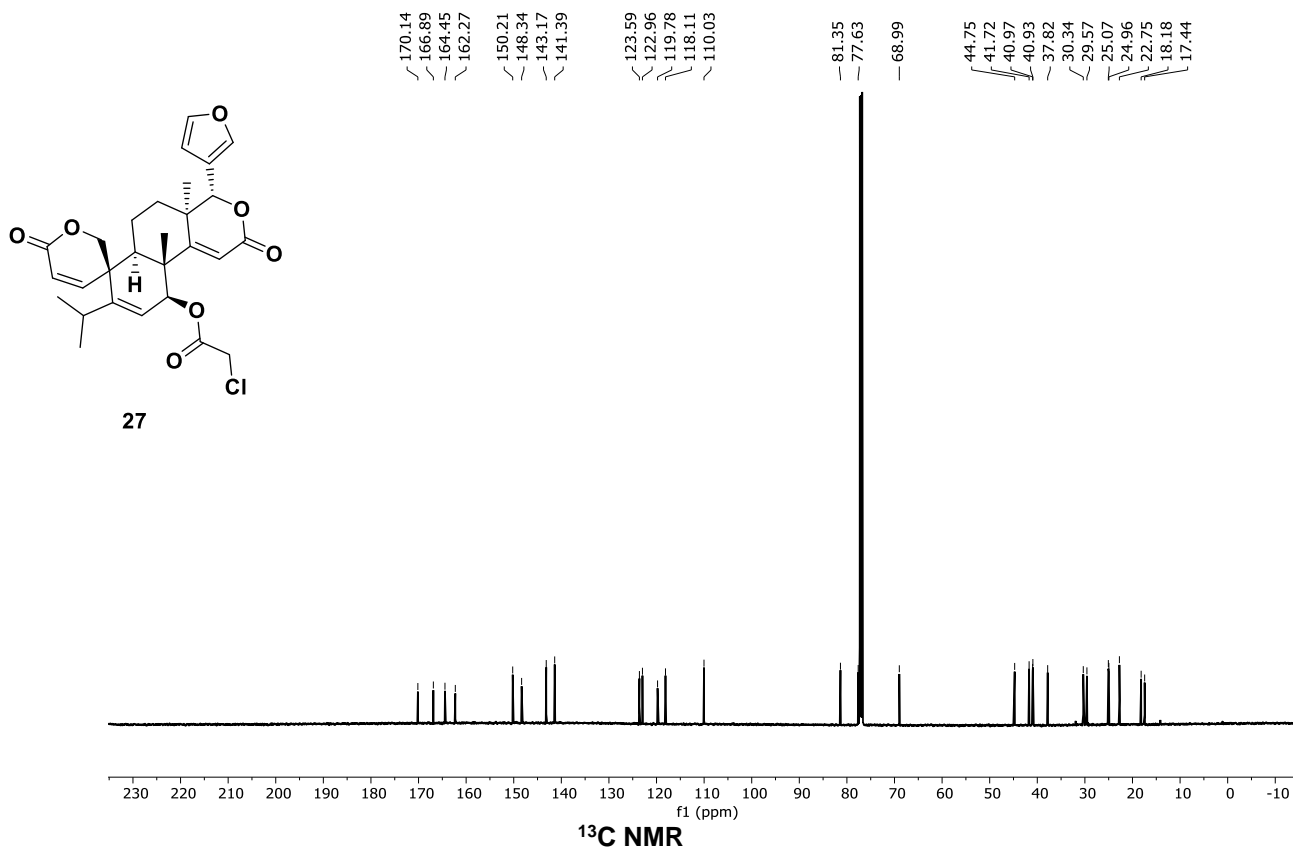

## SUPPORTING INFORMATION

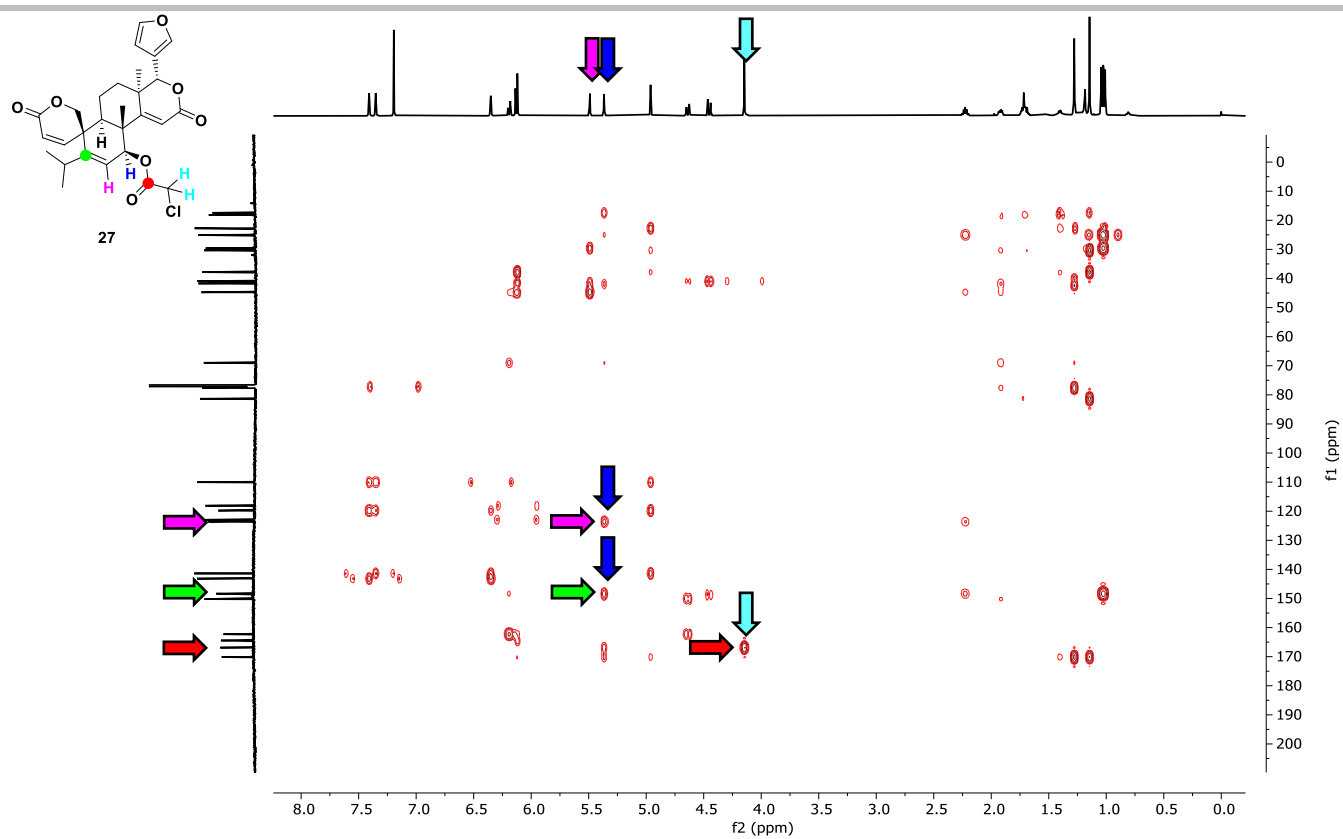 $^1\text{H}$ - $^{13}\text{C}$  HMBC NMR

## SUPPORTING INFORMATION

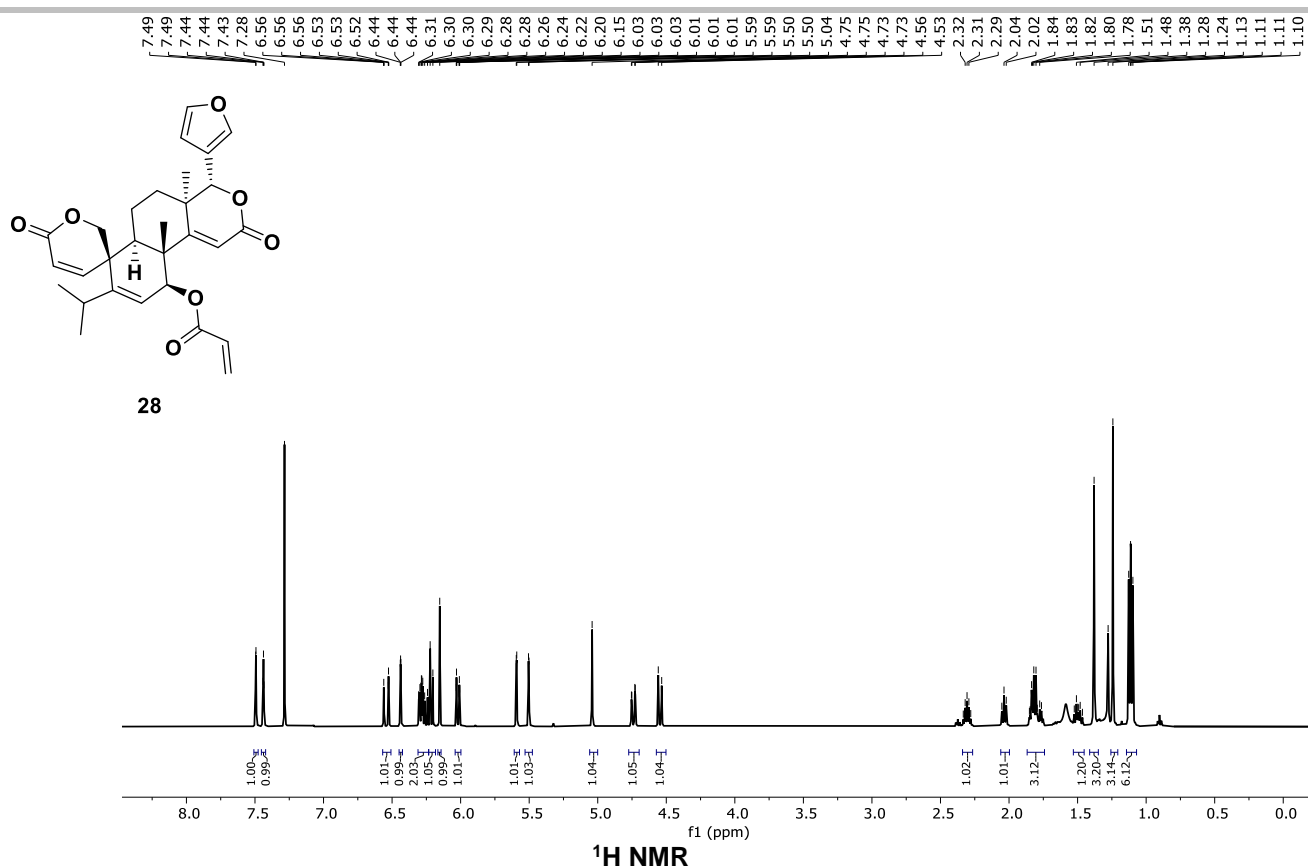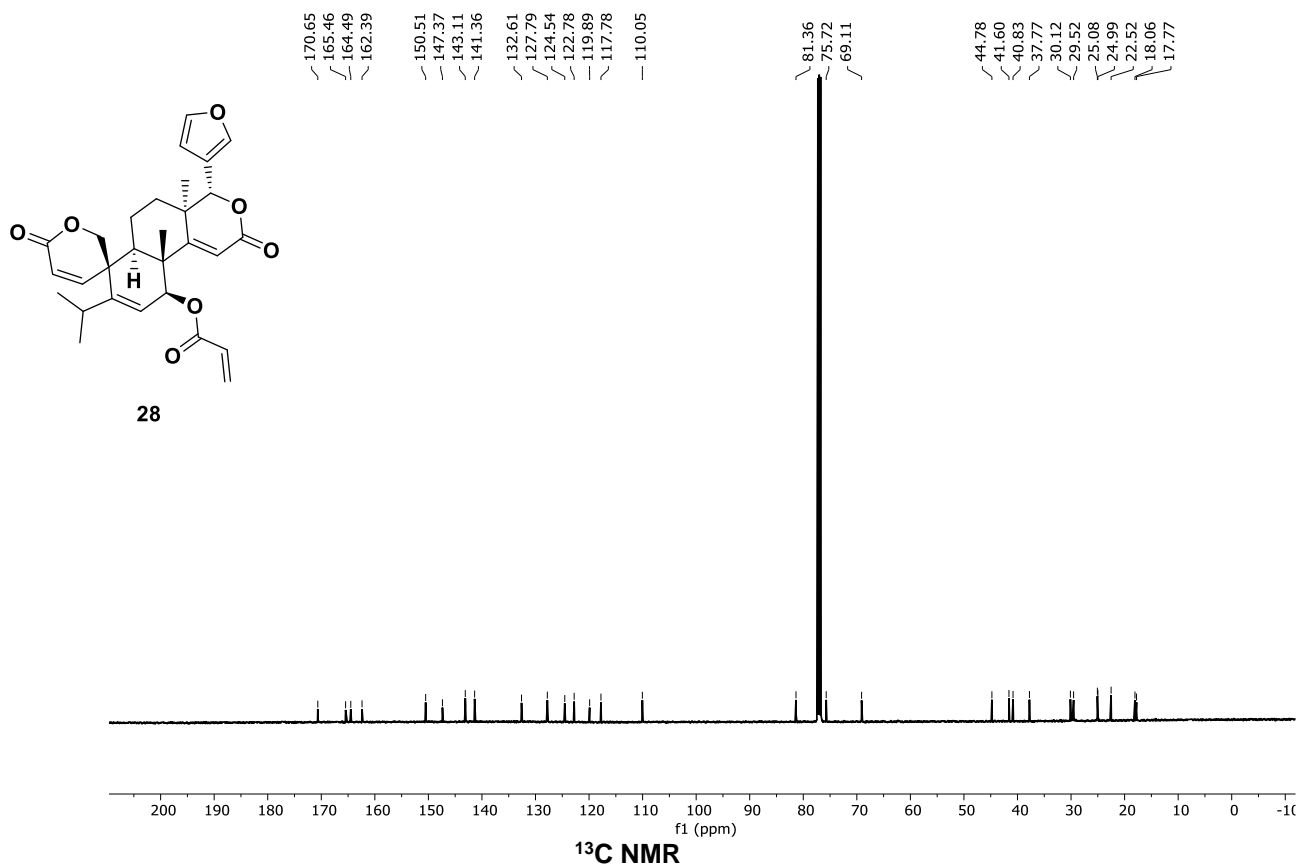



## SUPPORTING INFORMATION

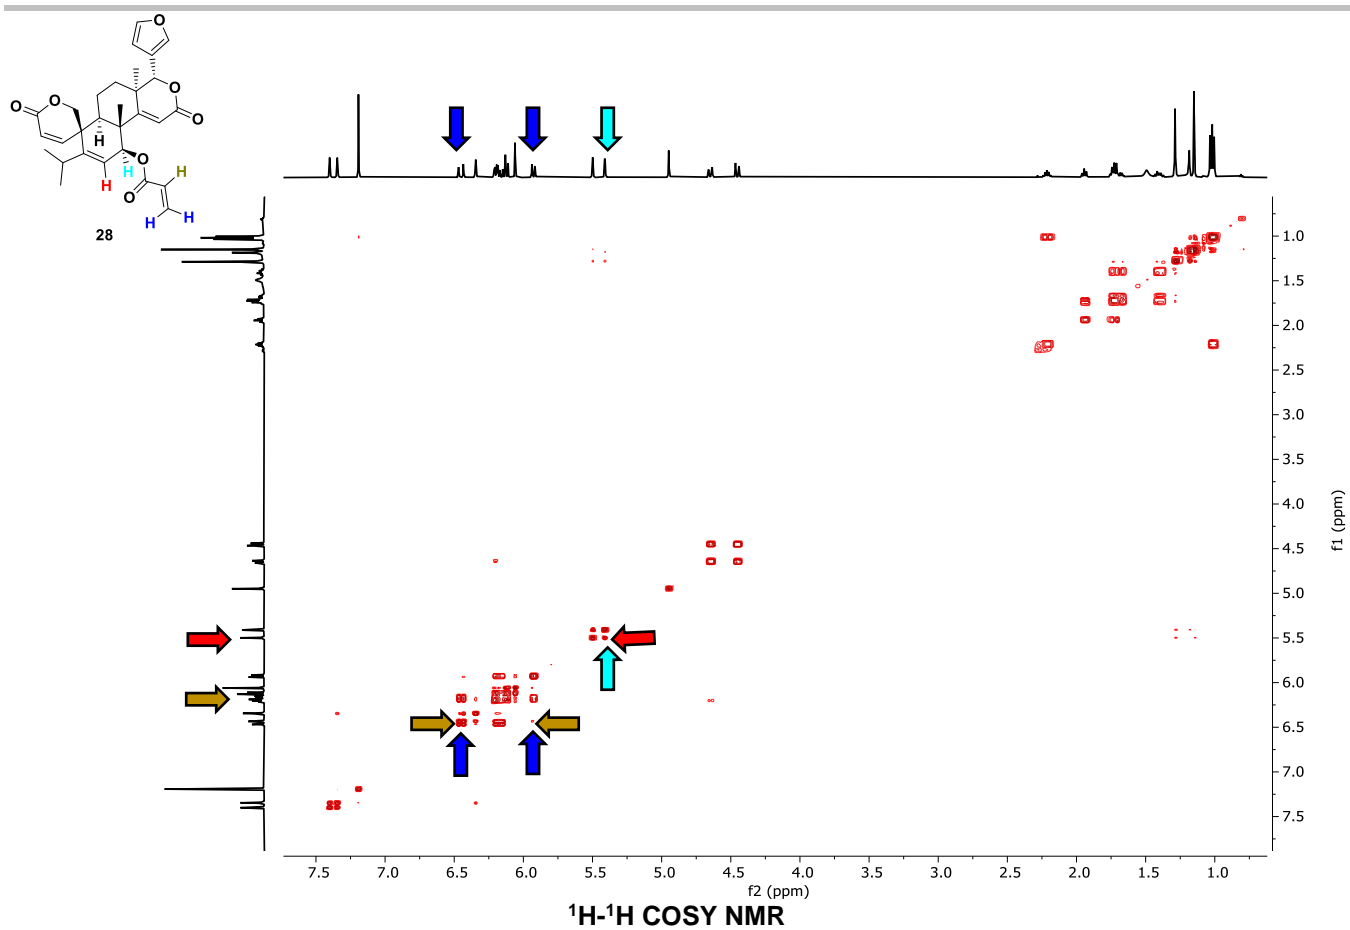

## SUPPORTING INFORMATION

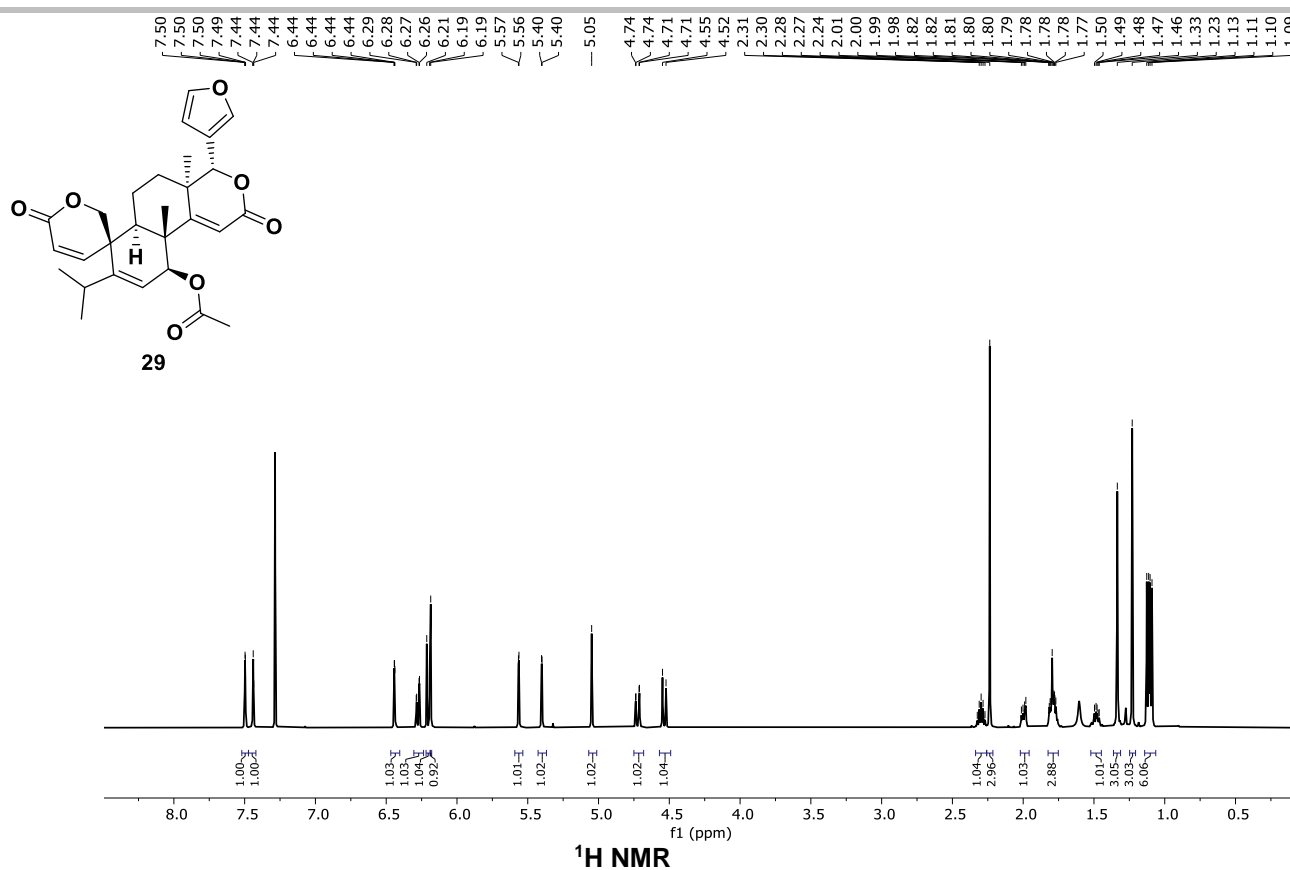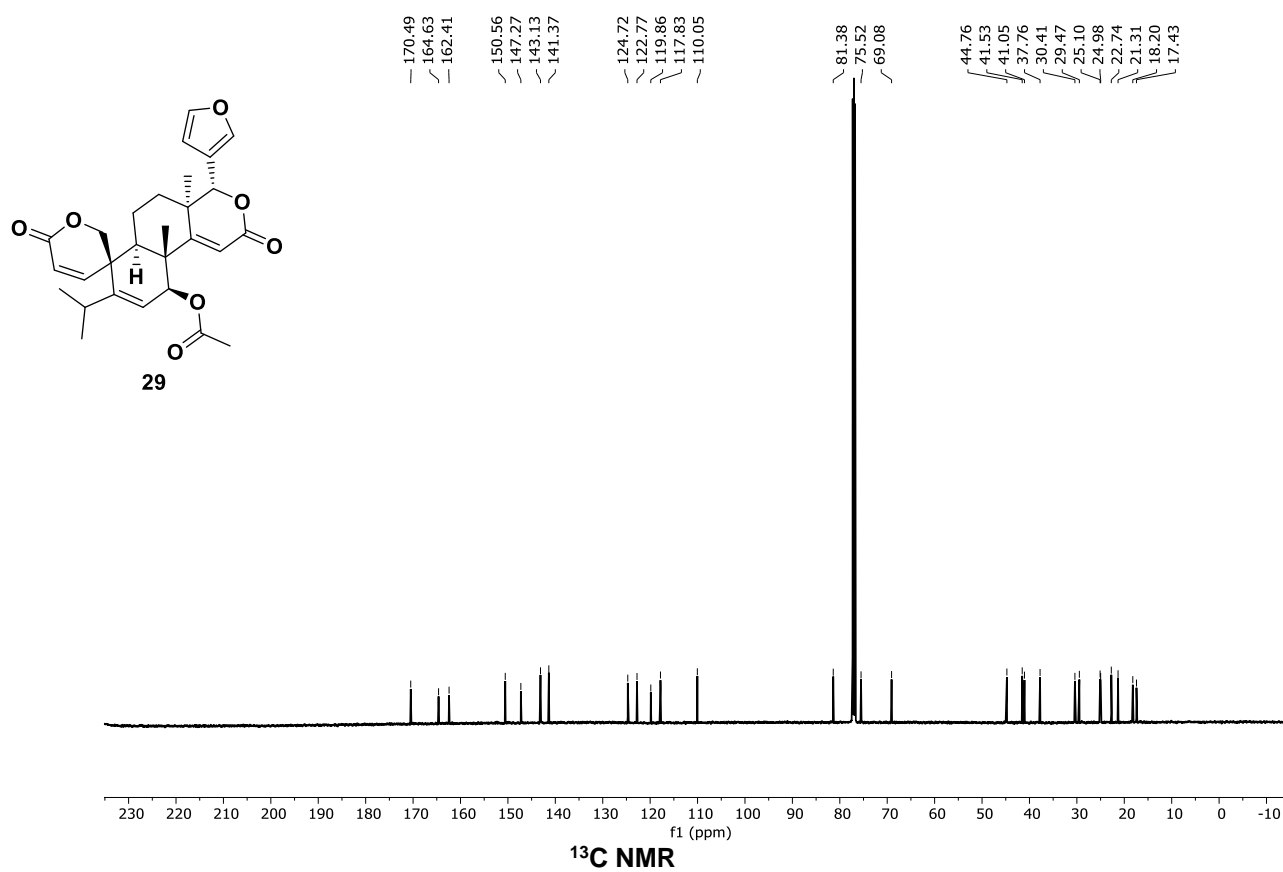

## SUPPORTING INFORMATION

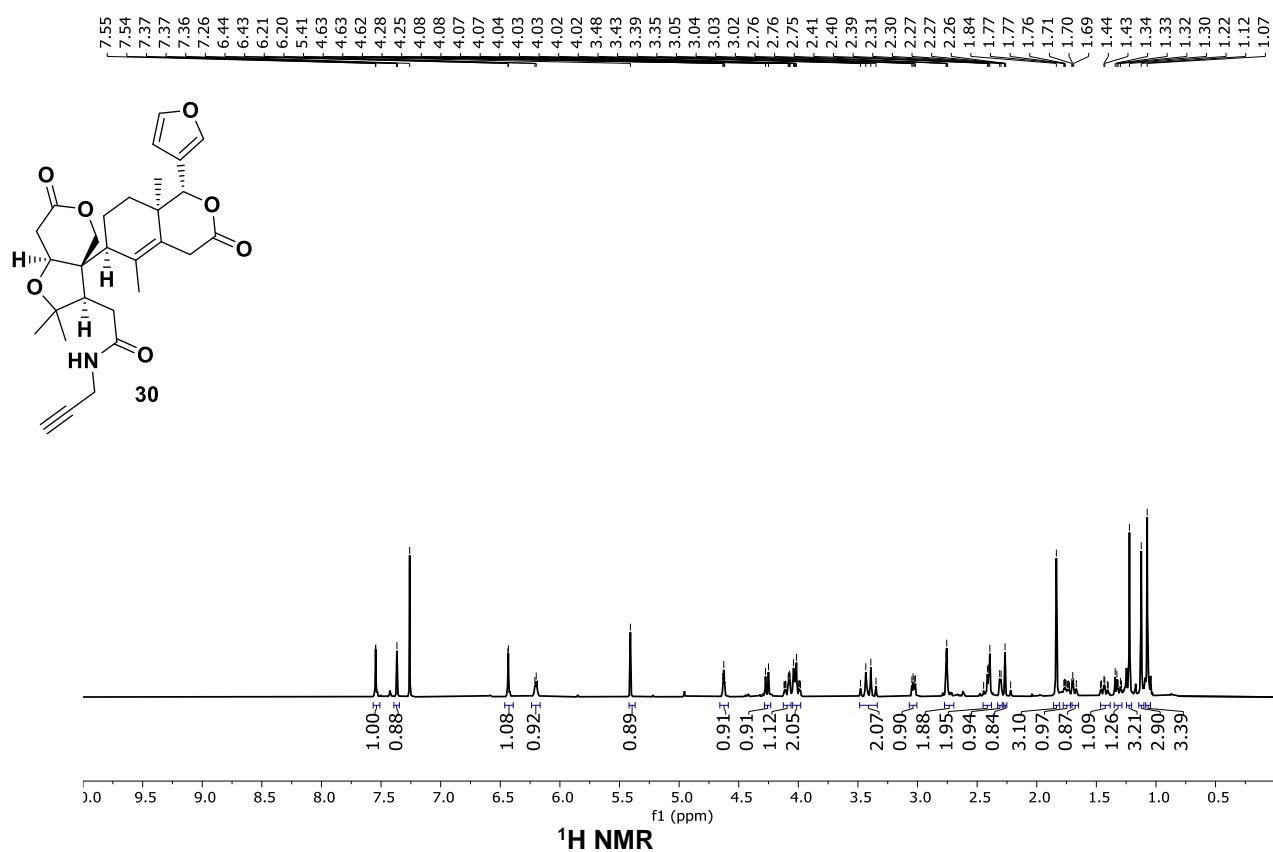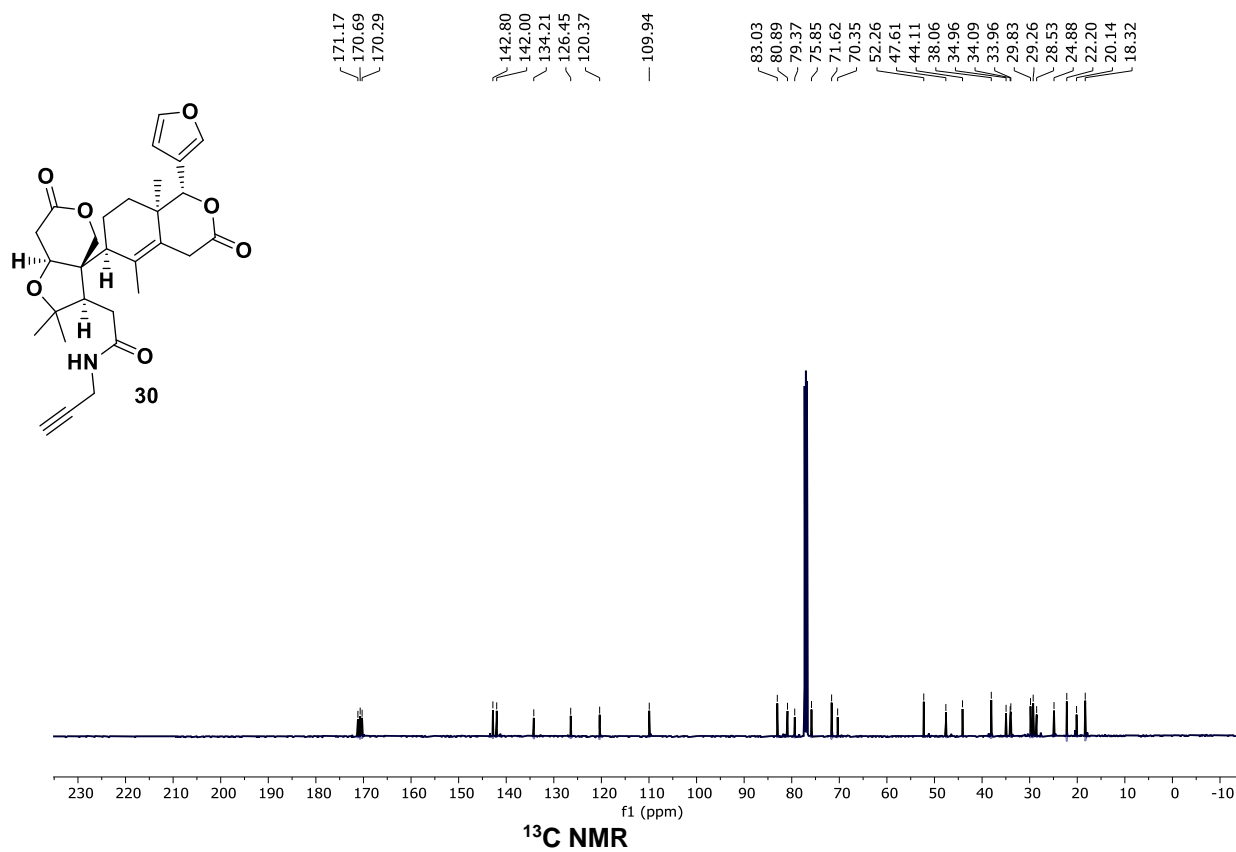

## SUPPORTING INFORMATION

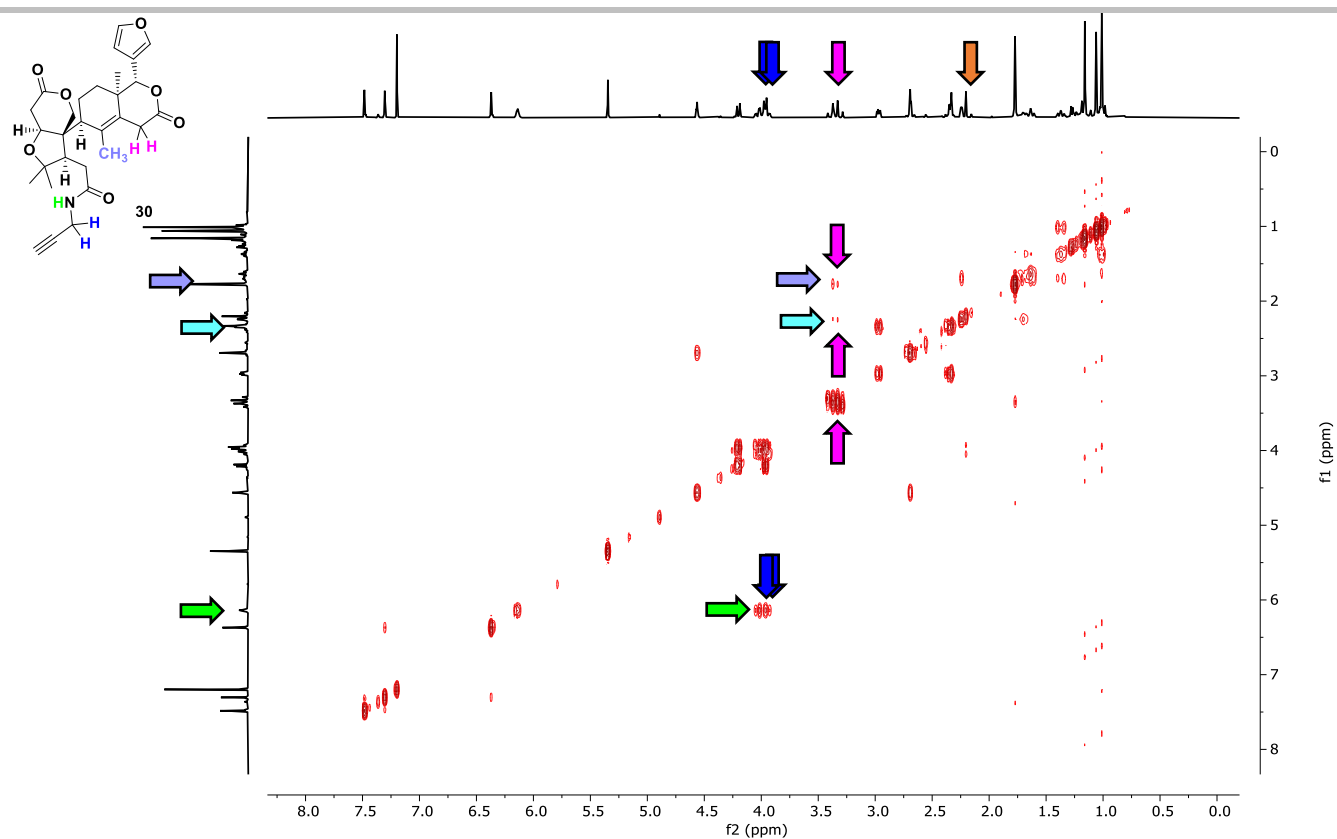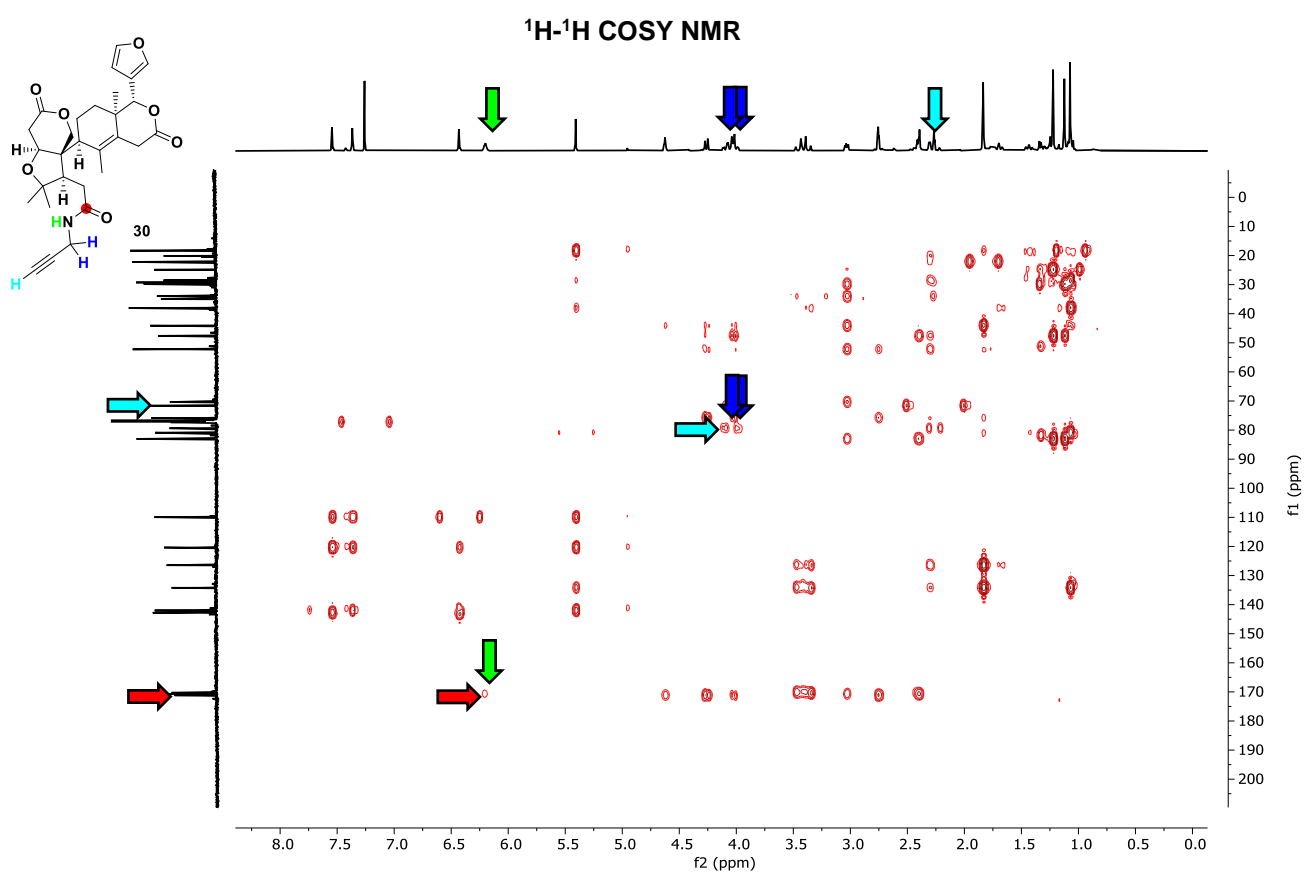 **$^1\text{H}$ - $^{13}\text{C}$  HMBC NMR**

## SUPPORTING INFORMATION

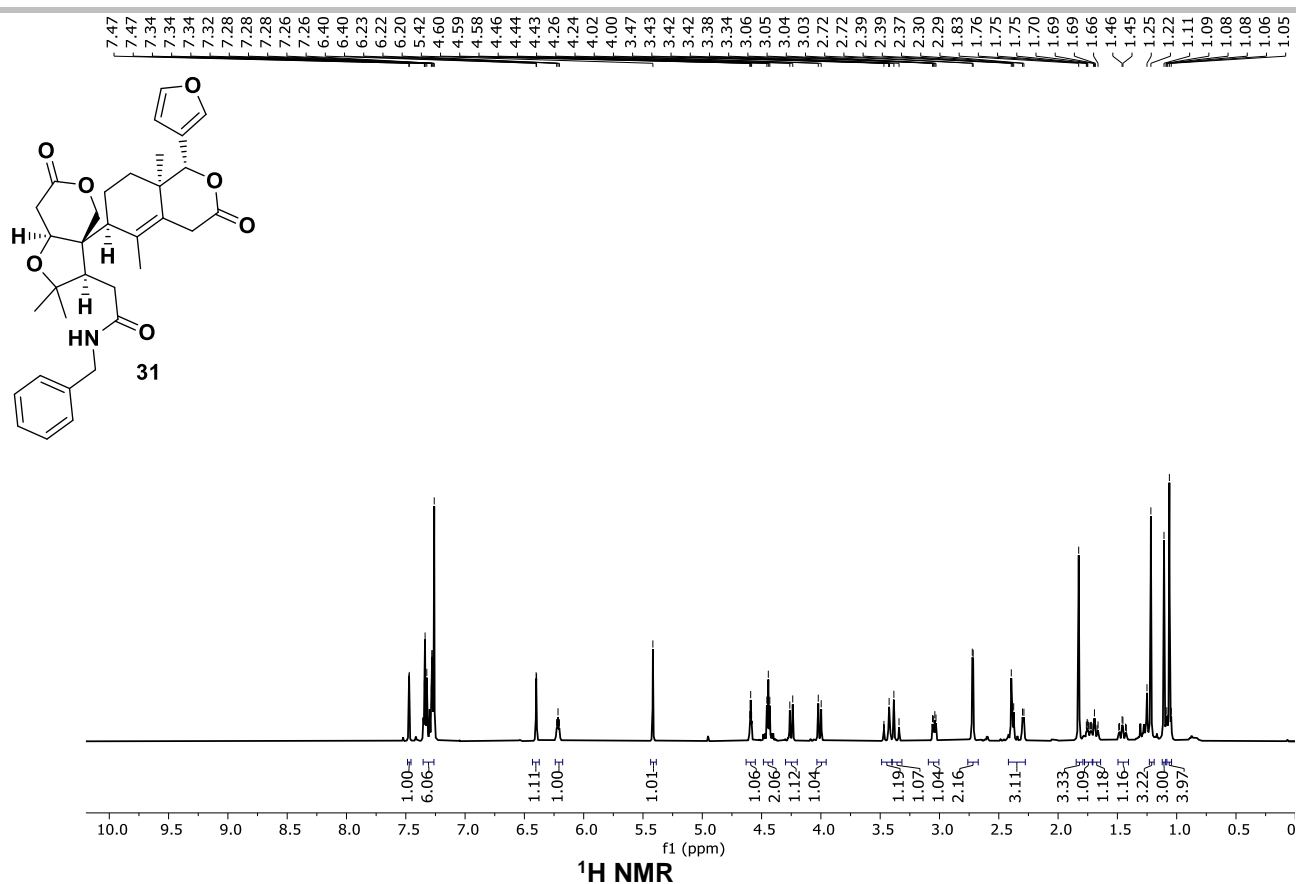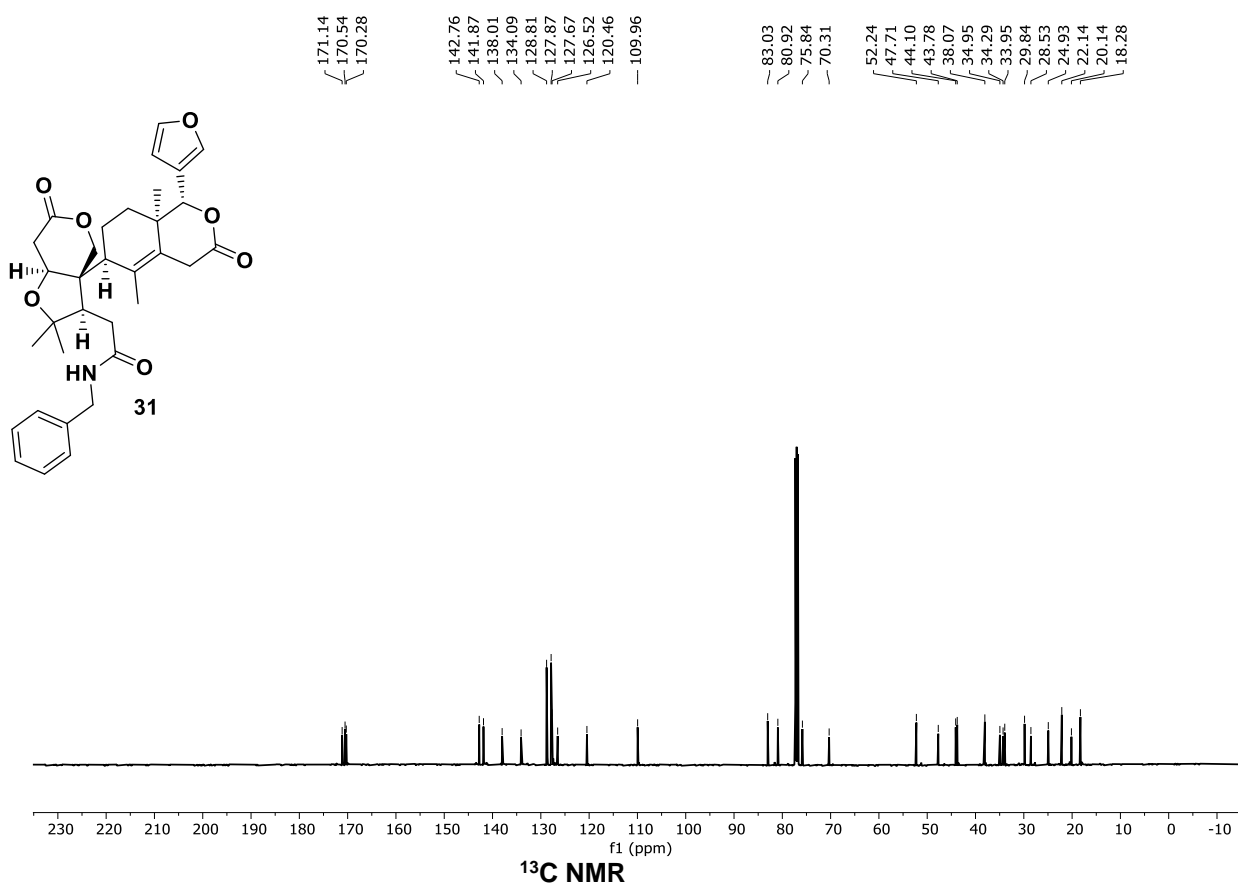

## SUPPORTING INFORMATION

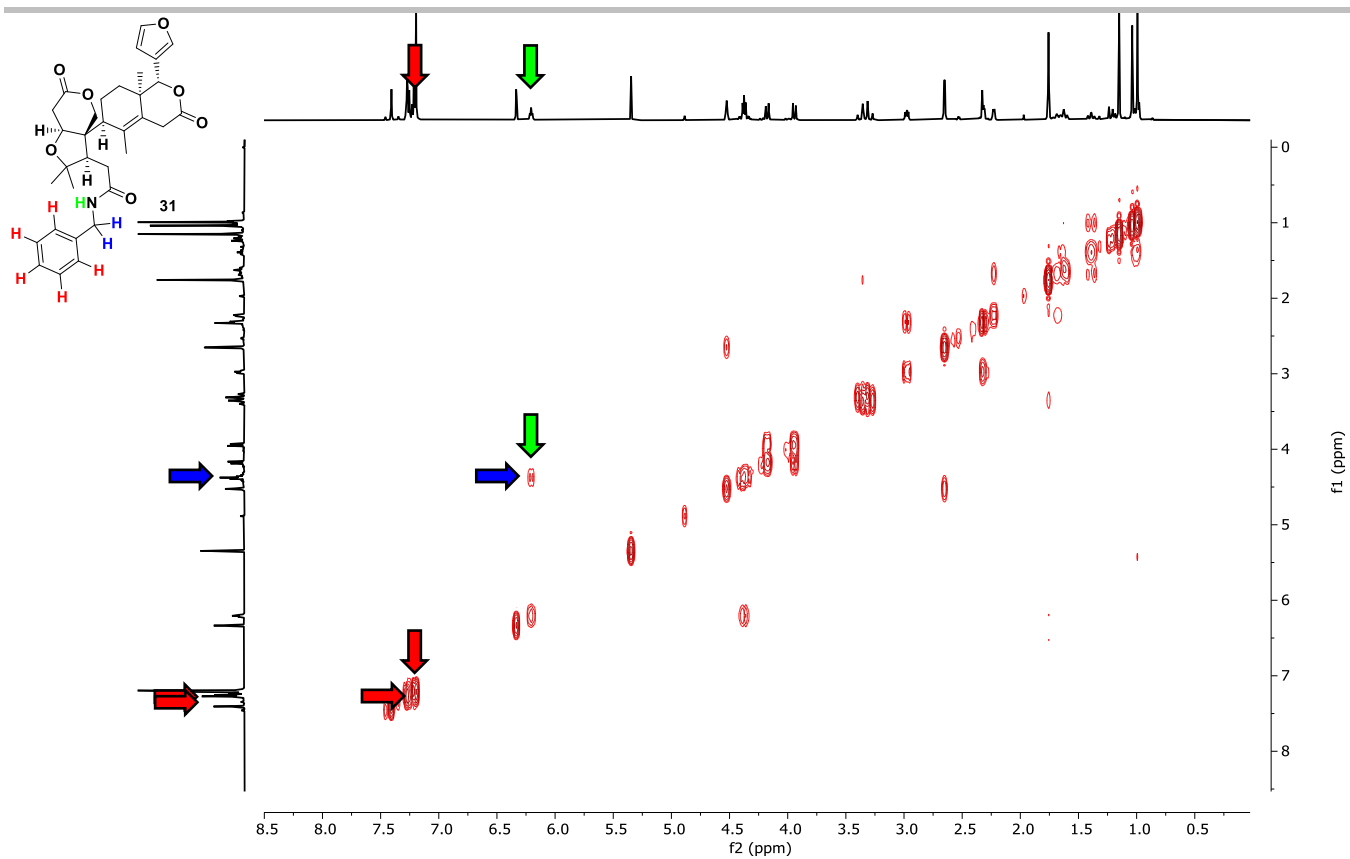 $^1\text{H}$ - $^1\text{H}$  COSY NMR

## SUPPORTING INFORMATION

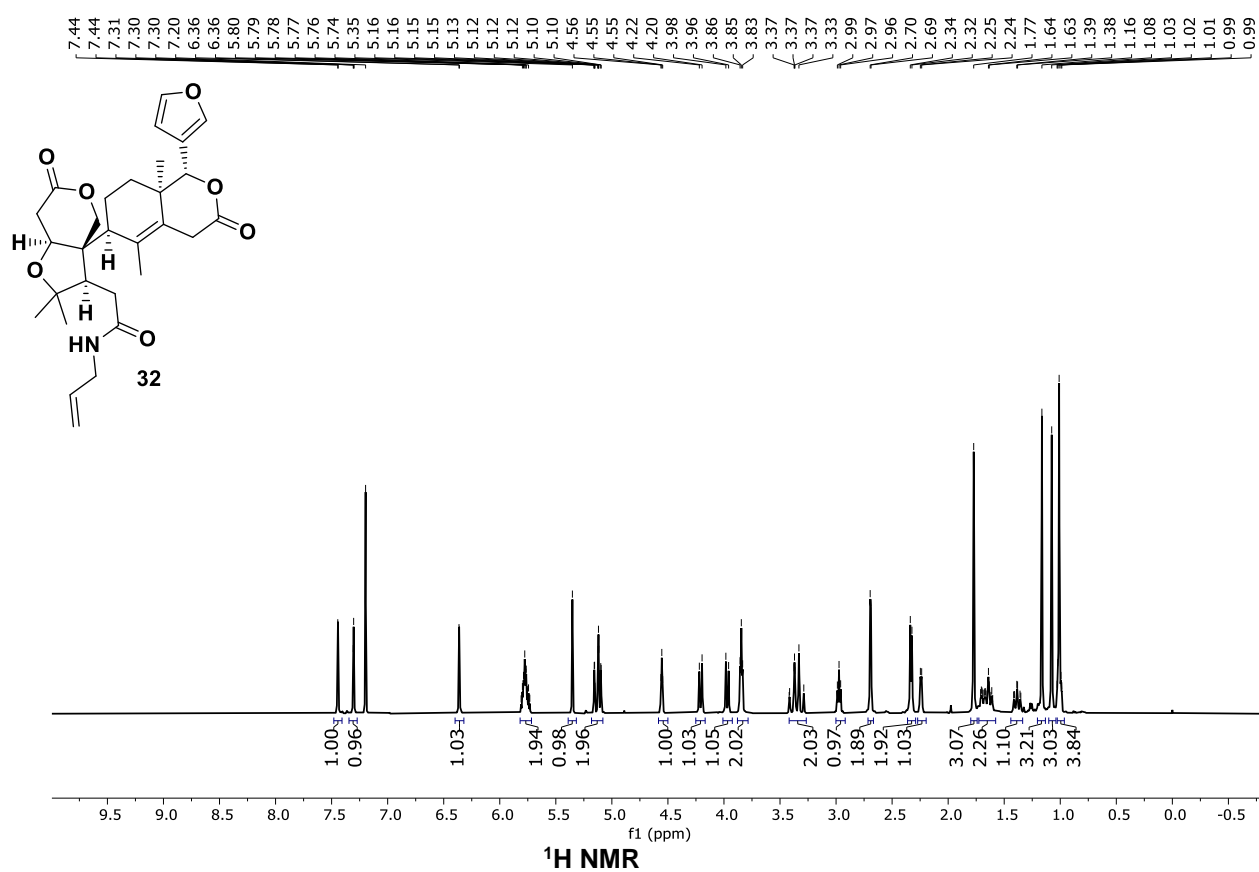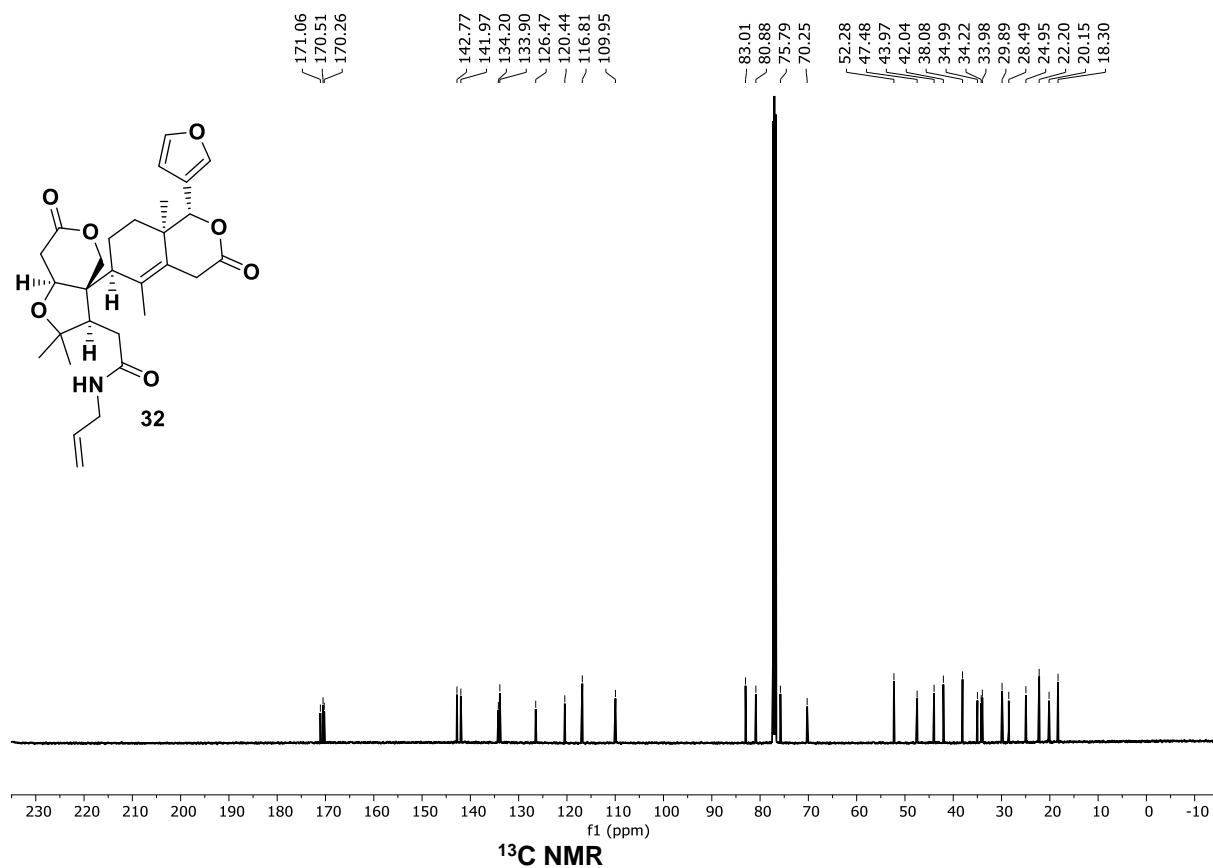

## SUPPORTING INFORMATION

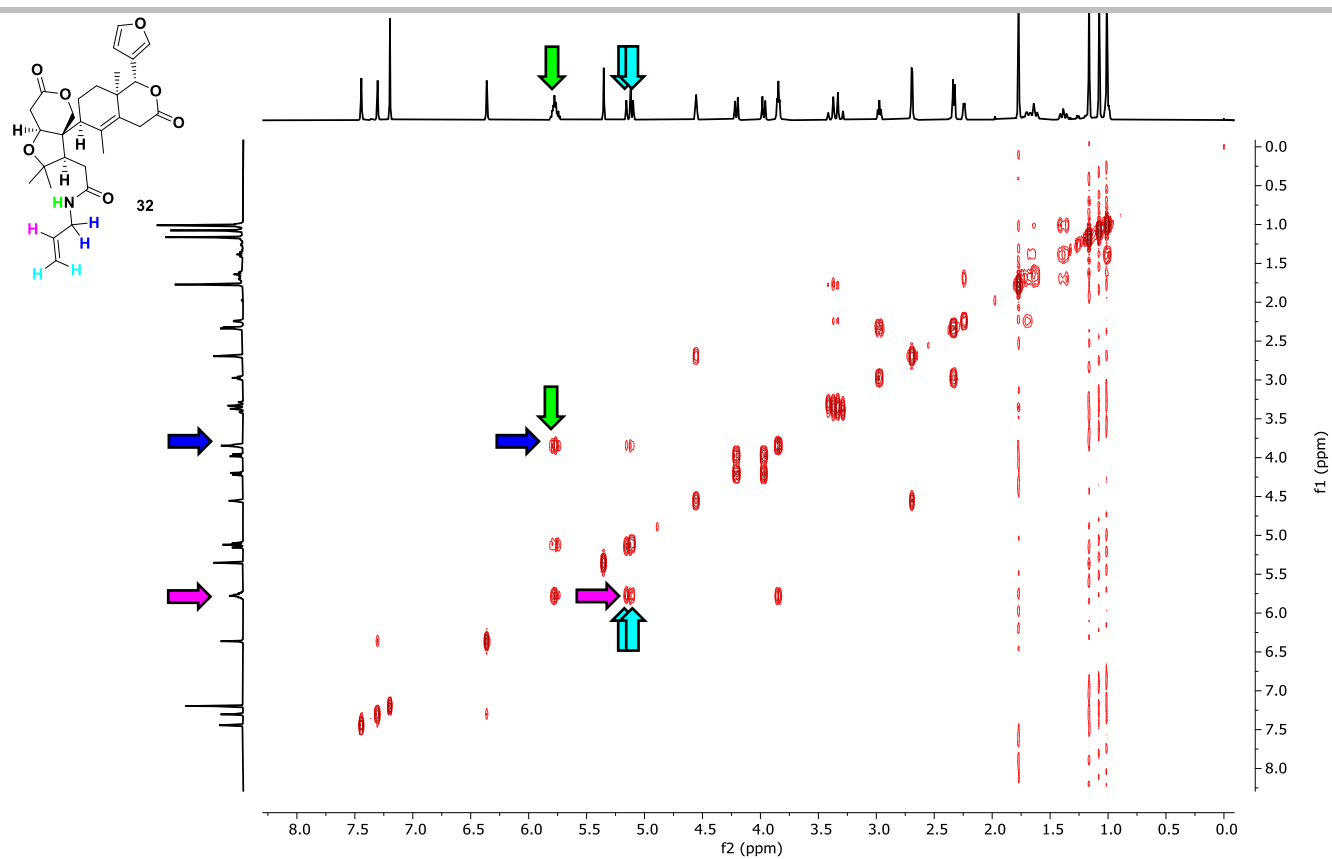 $^1\text{H}$ - $^1\text{H}$  COSY NMR



## SUPPORTING INFORMATION

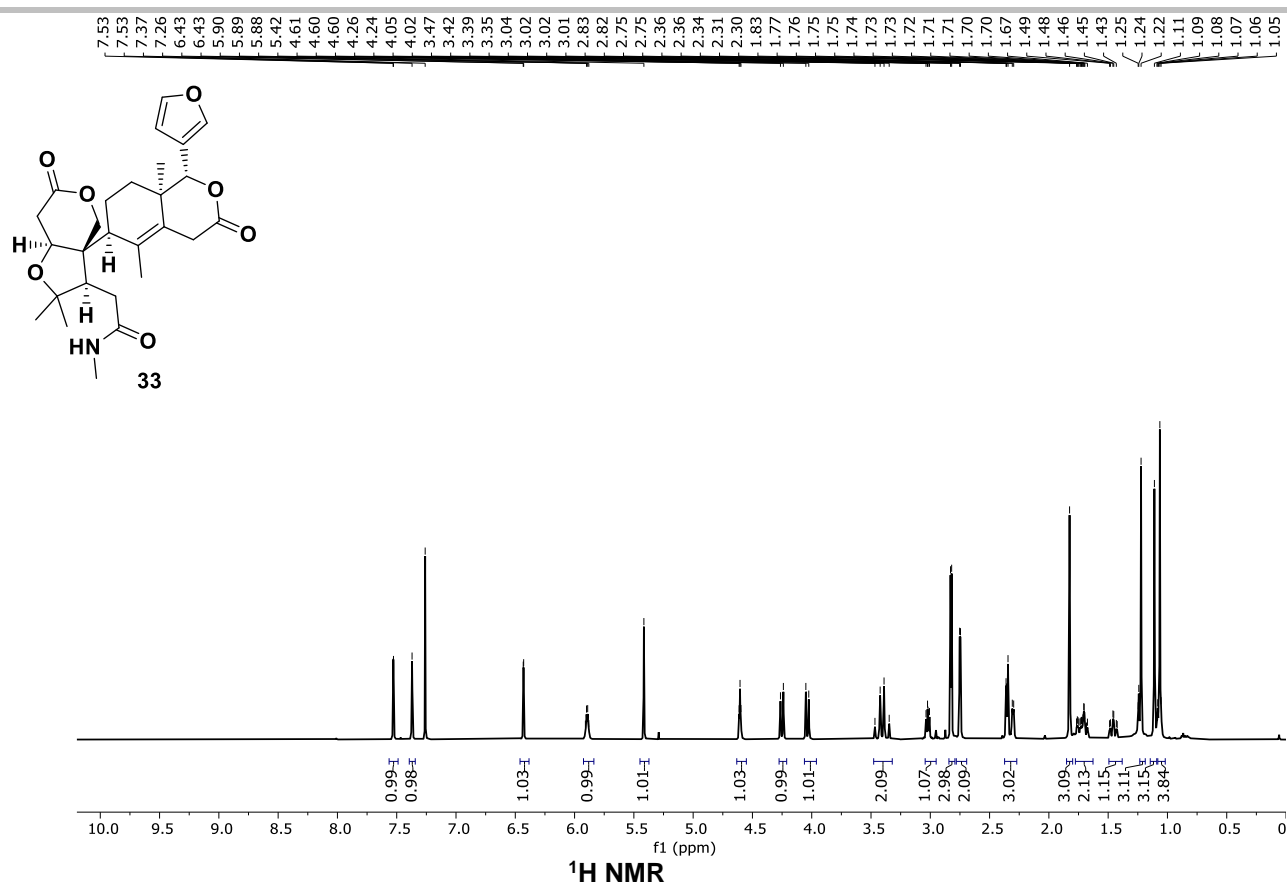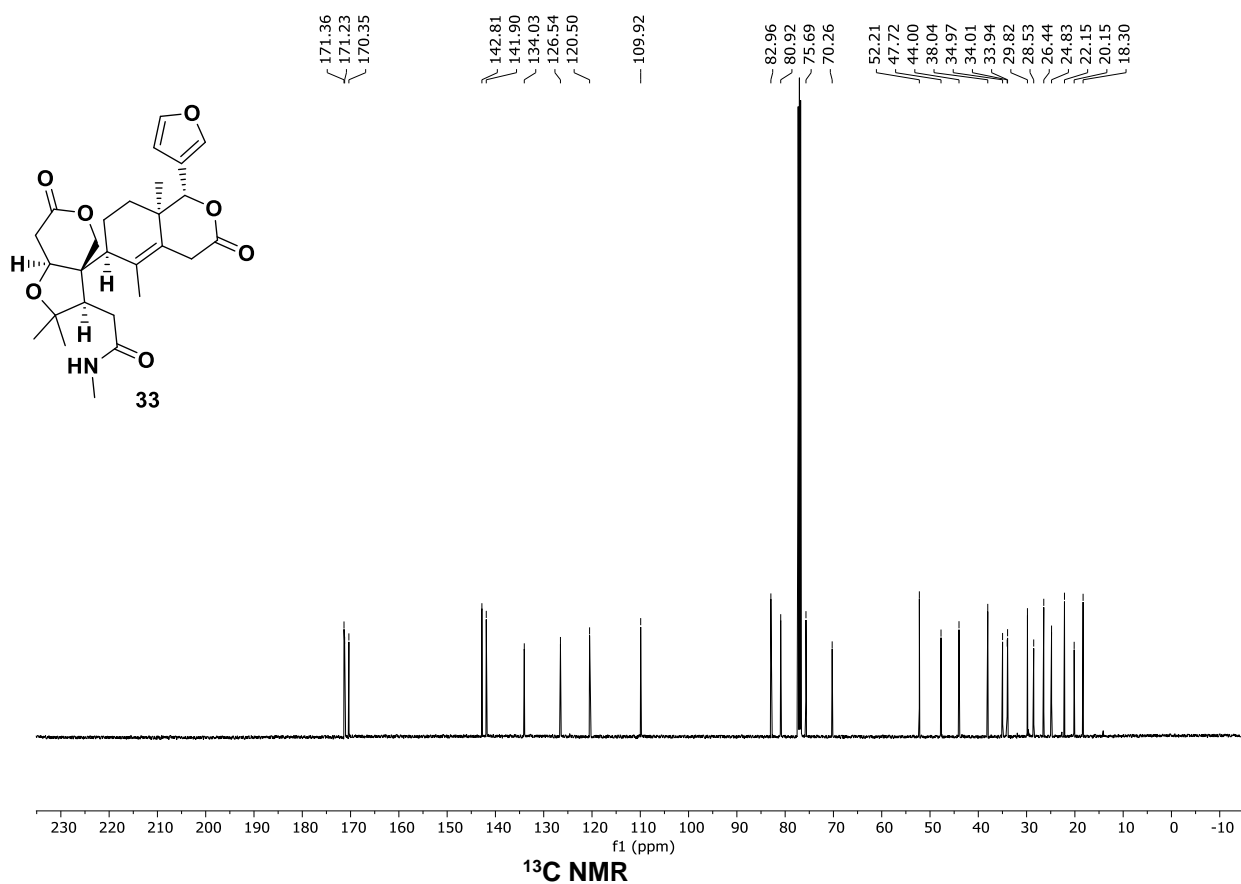

## SUPPORTING INFORMATION

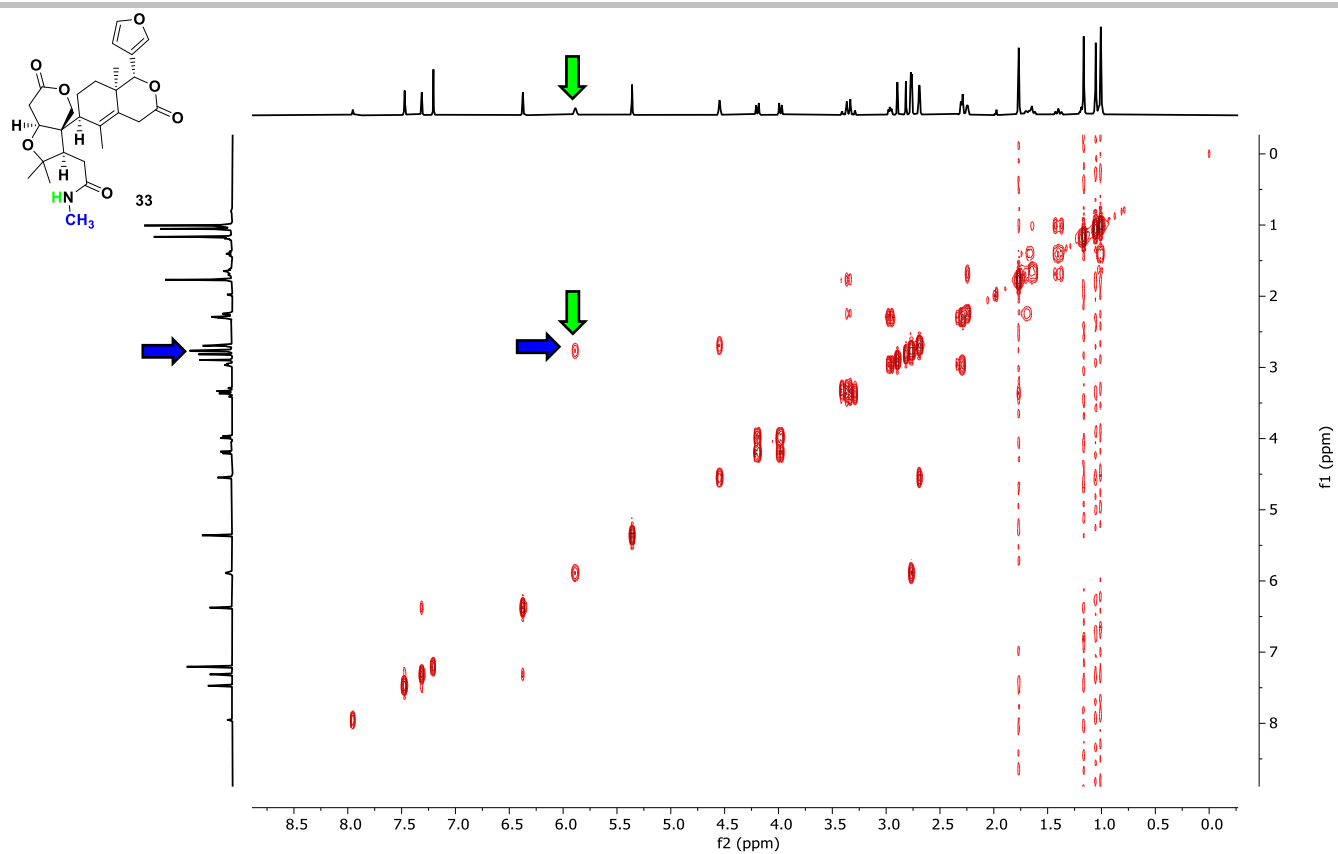 $^1\text{H}$ - $^1\text{H}$  COSY NMR

## SUPPORTING INFORMATION

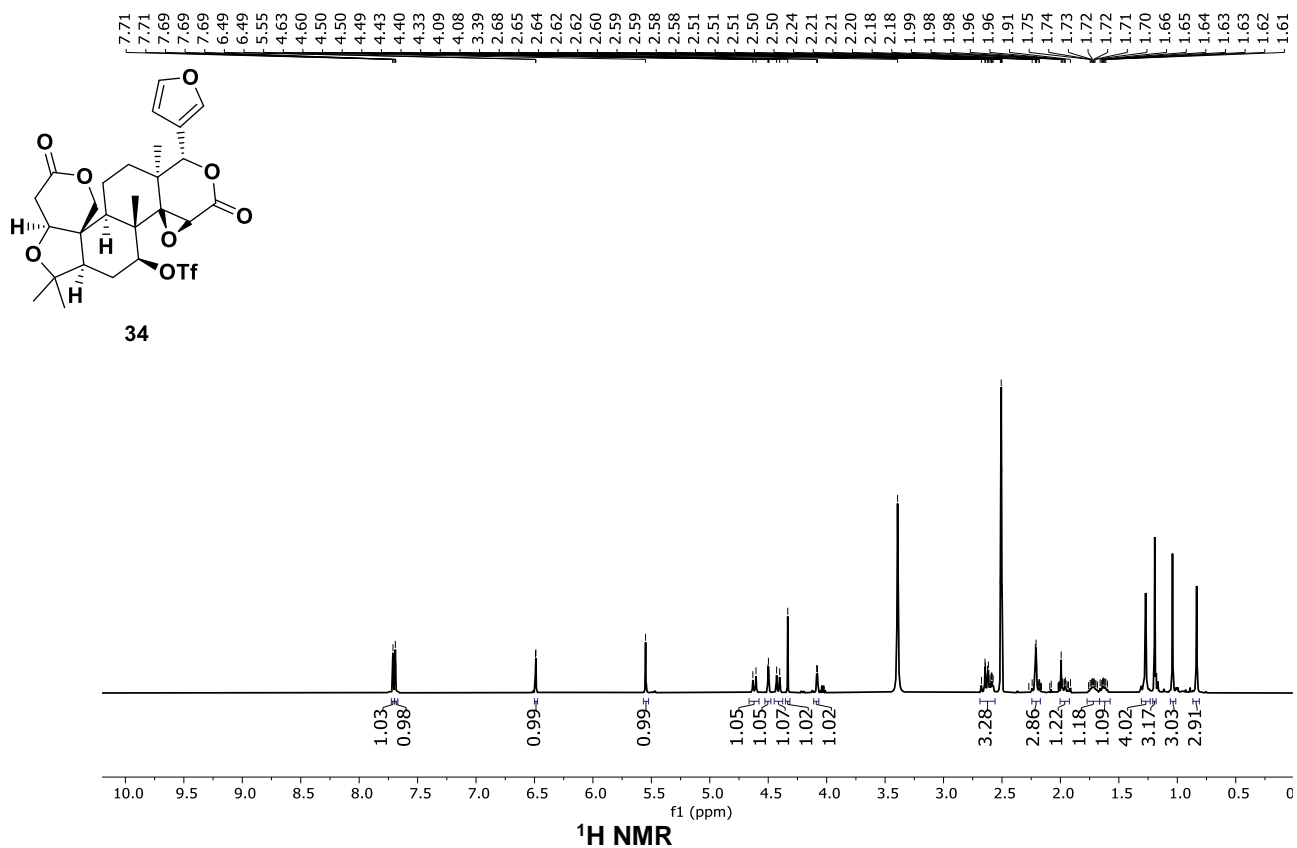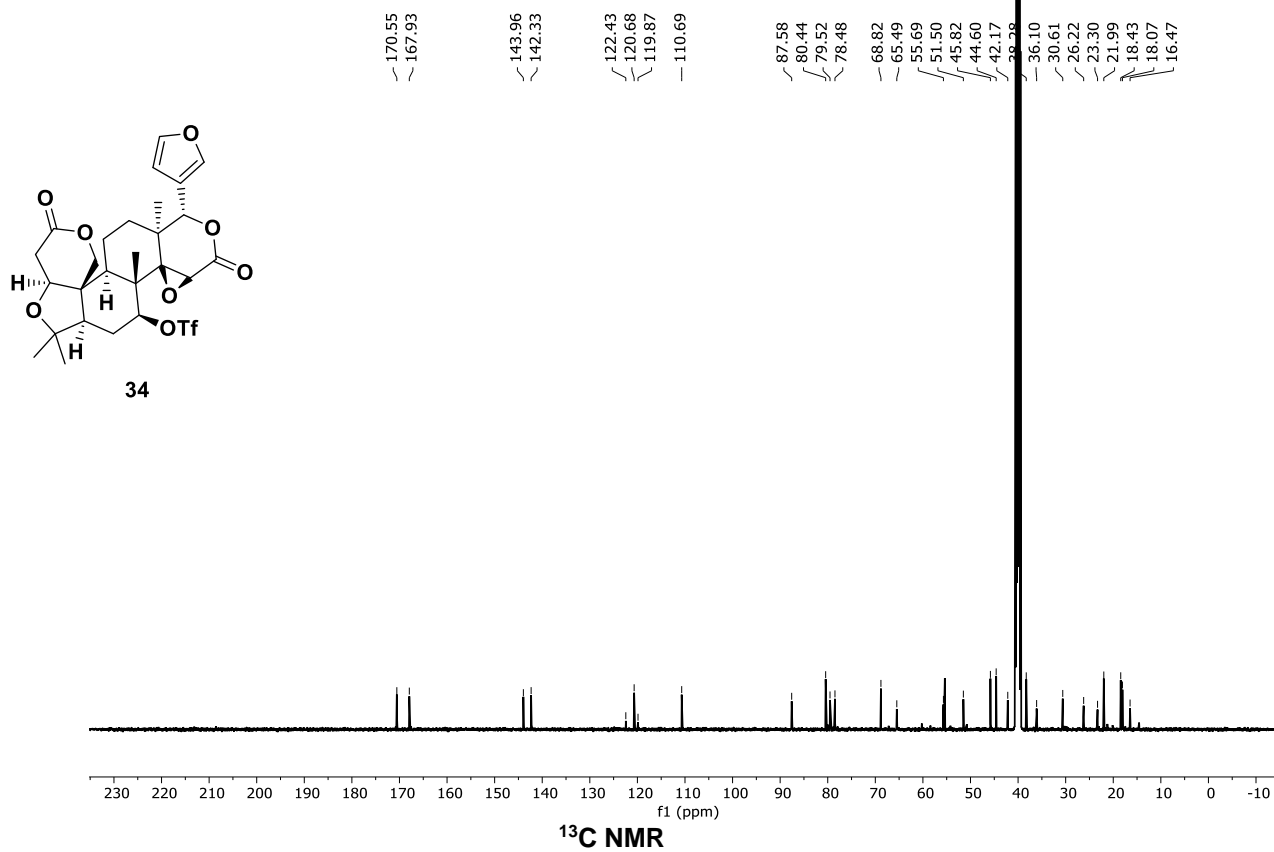

## SUPPORTING INFORMATION

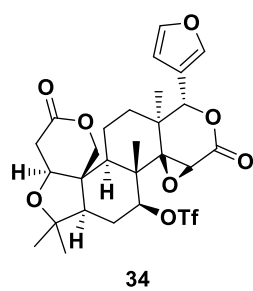

-77.7474

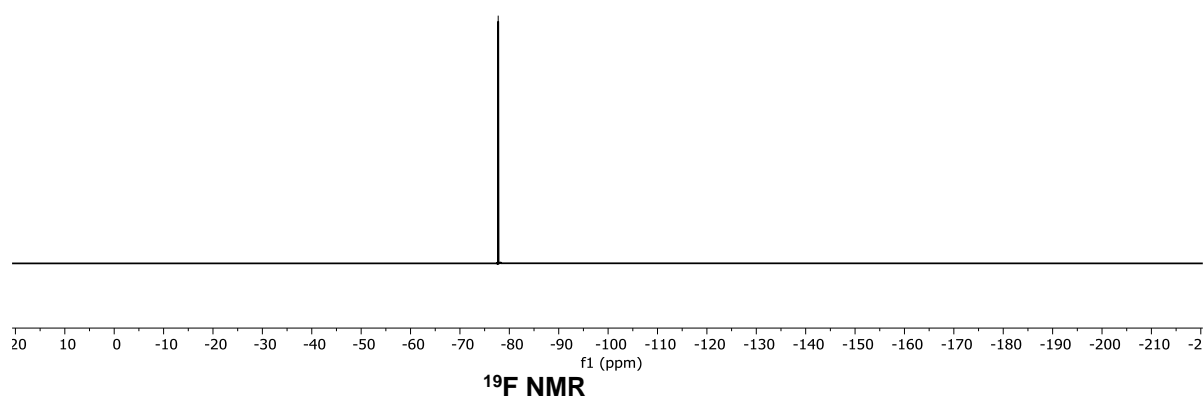

## SUPPORTING INFORMATION

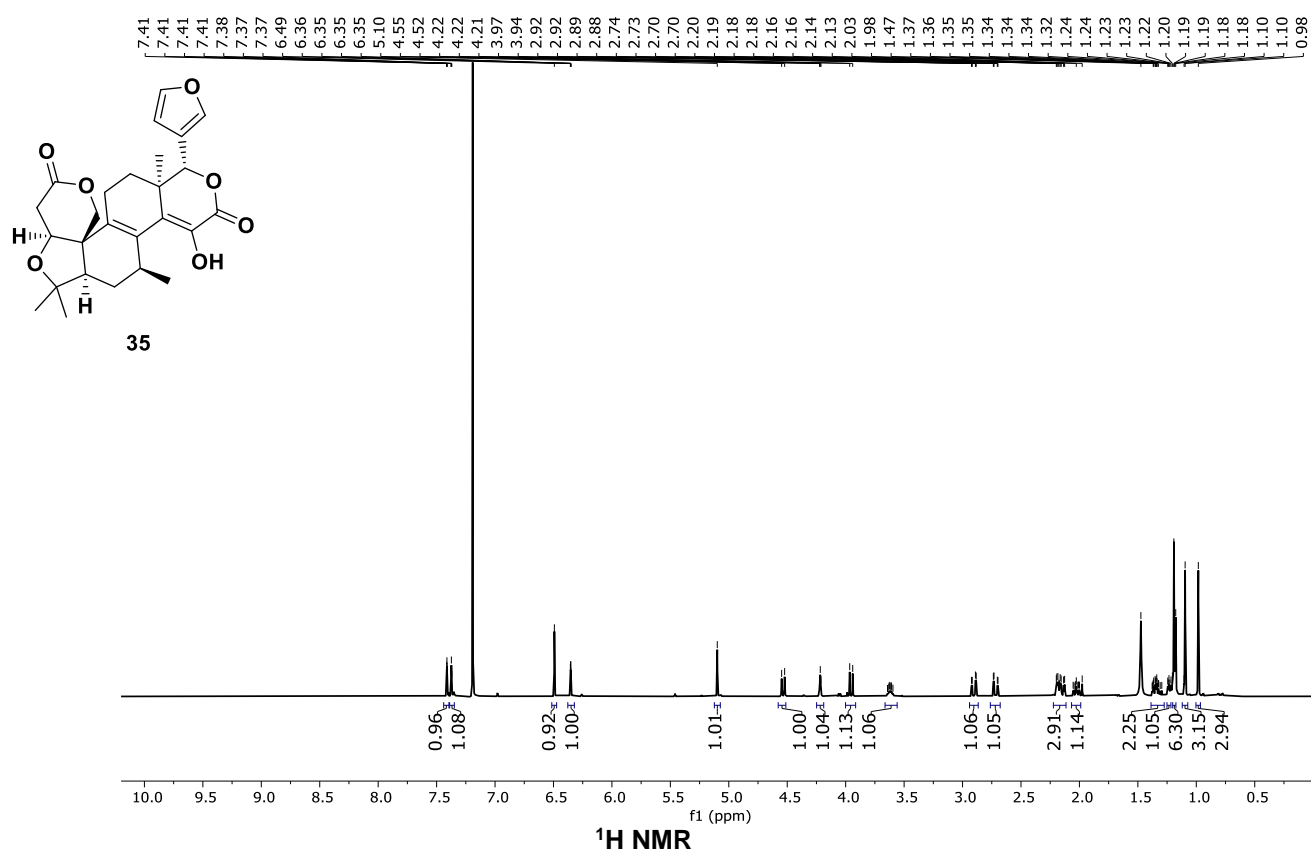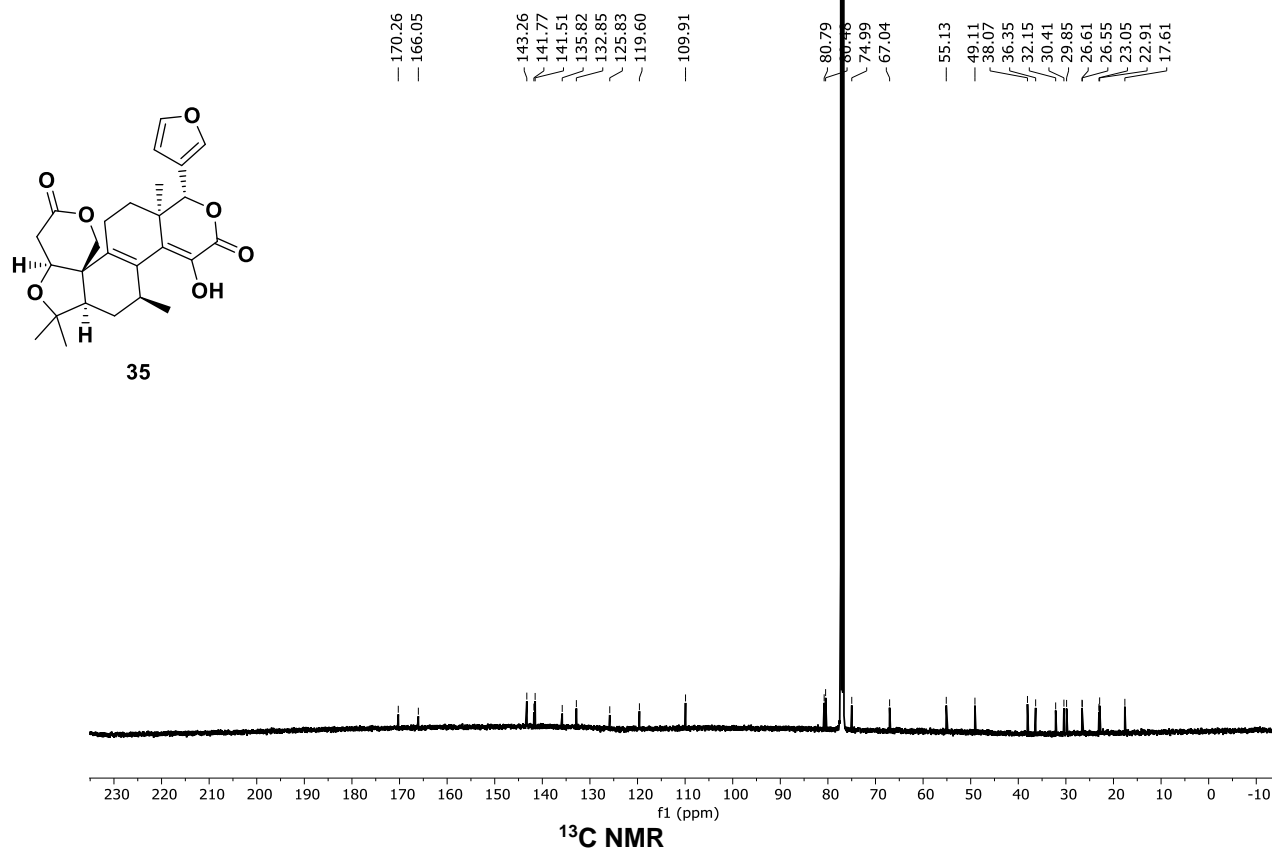

## SUPPORTING INFORMATION

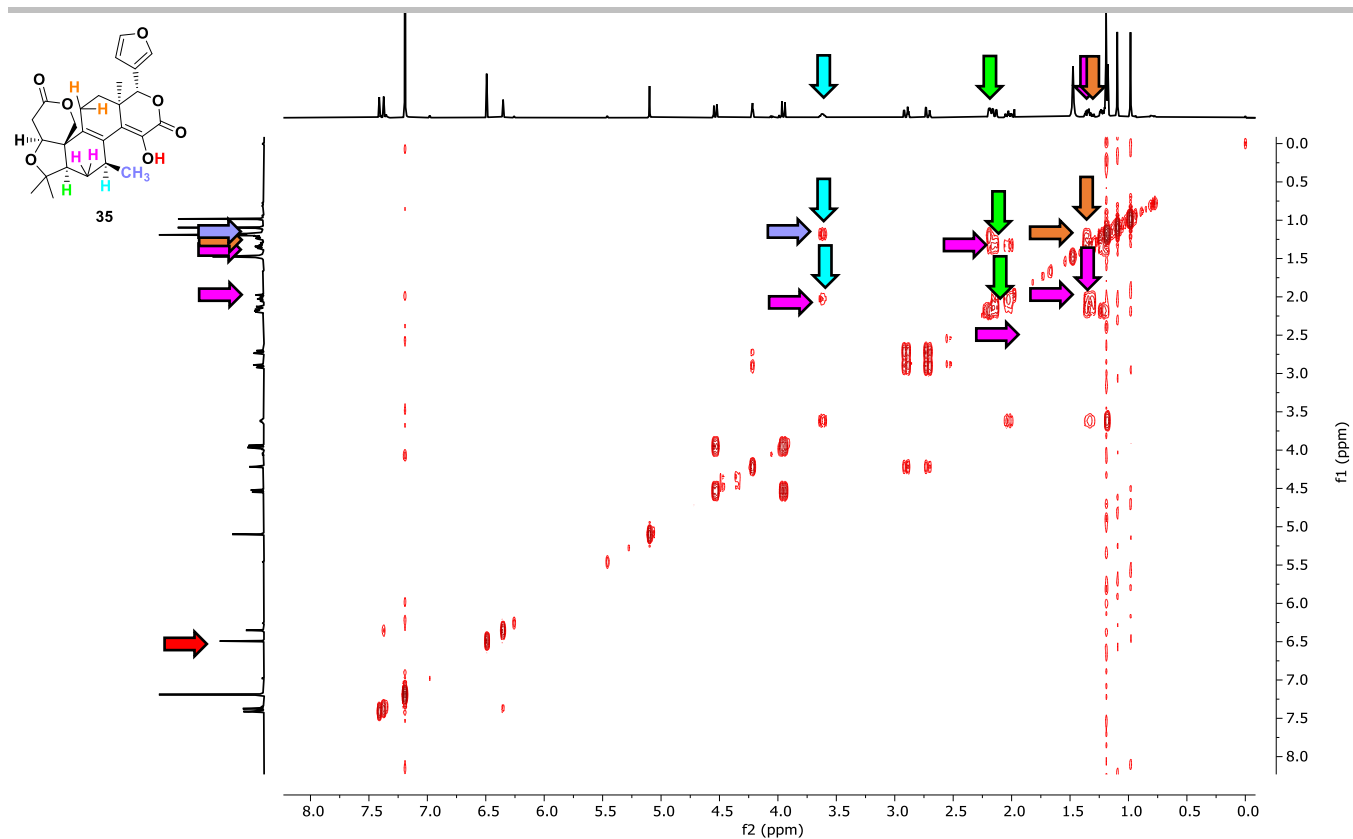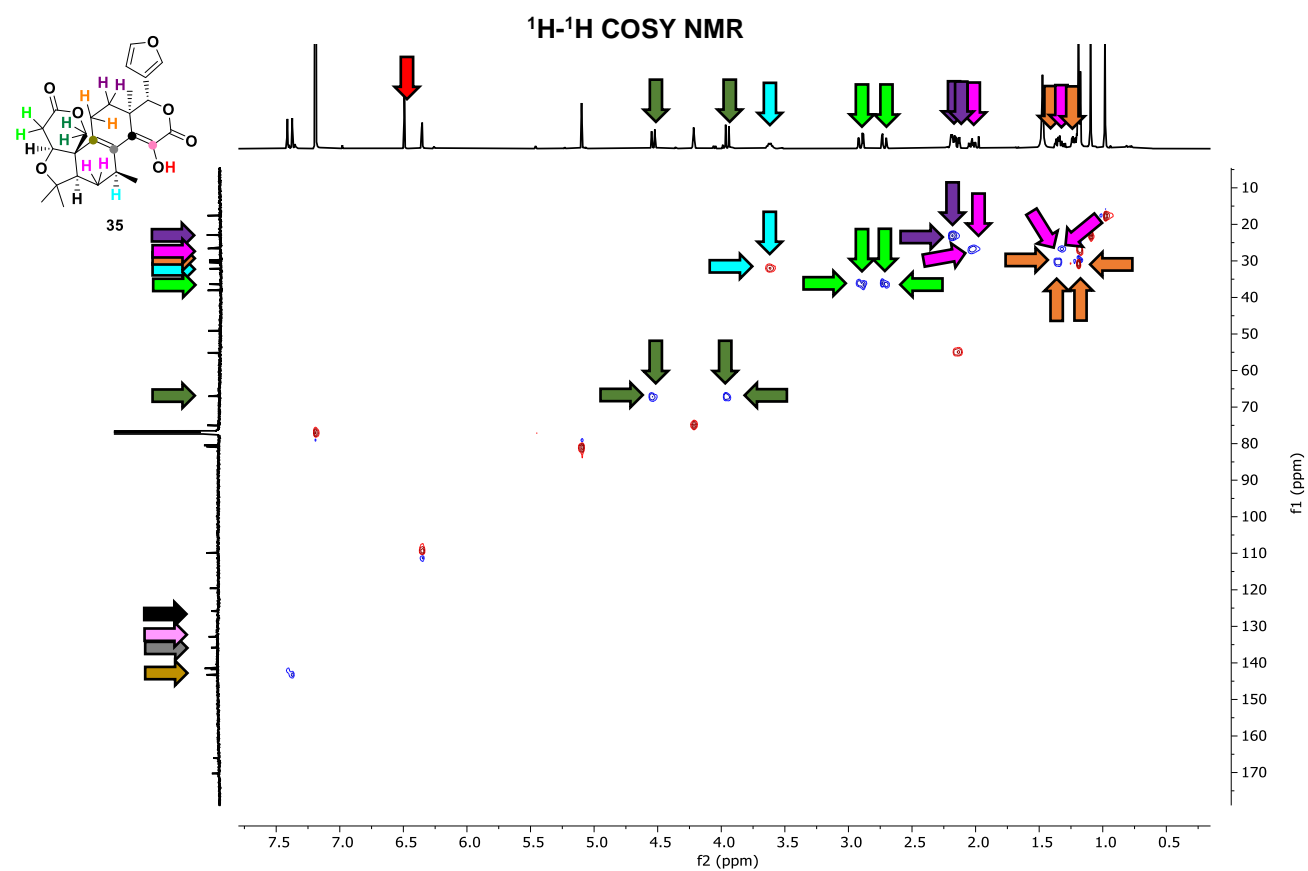

## SUPPORTING INFORMATION

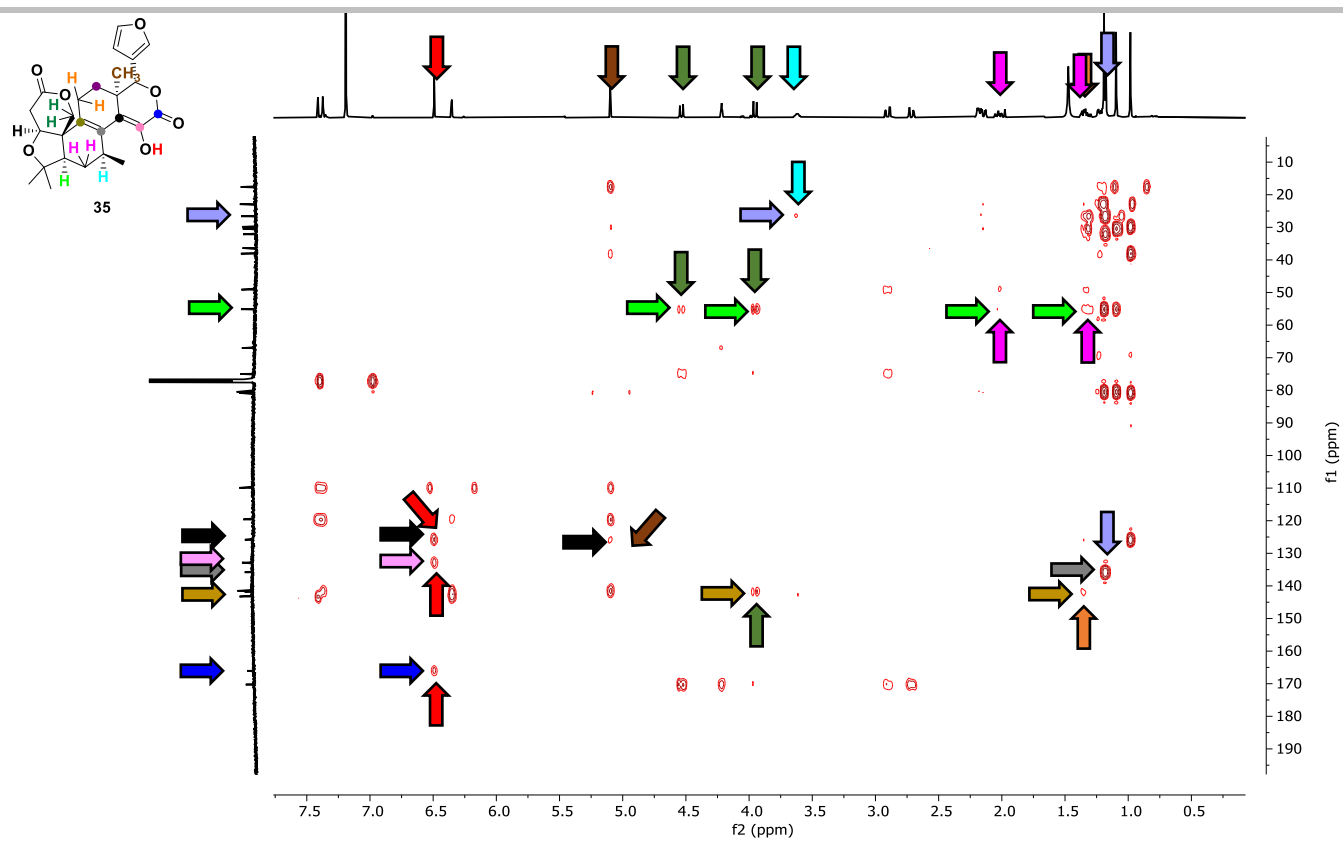 $^1\text{H}$ - $^{13}\text{C}$  HMBC NMR

## SUPPORTING INFORMATION

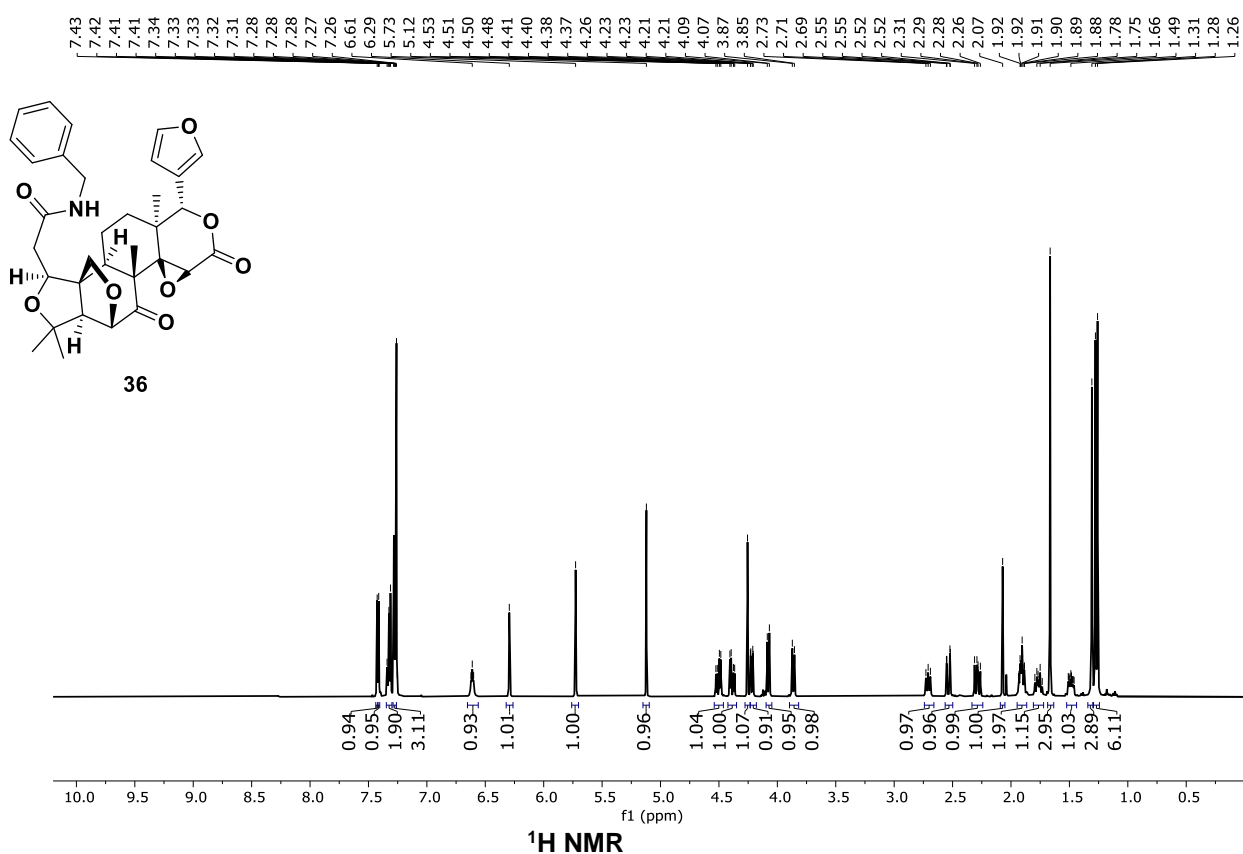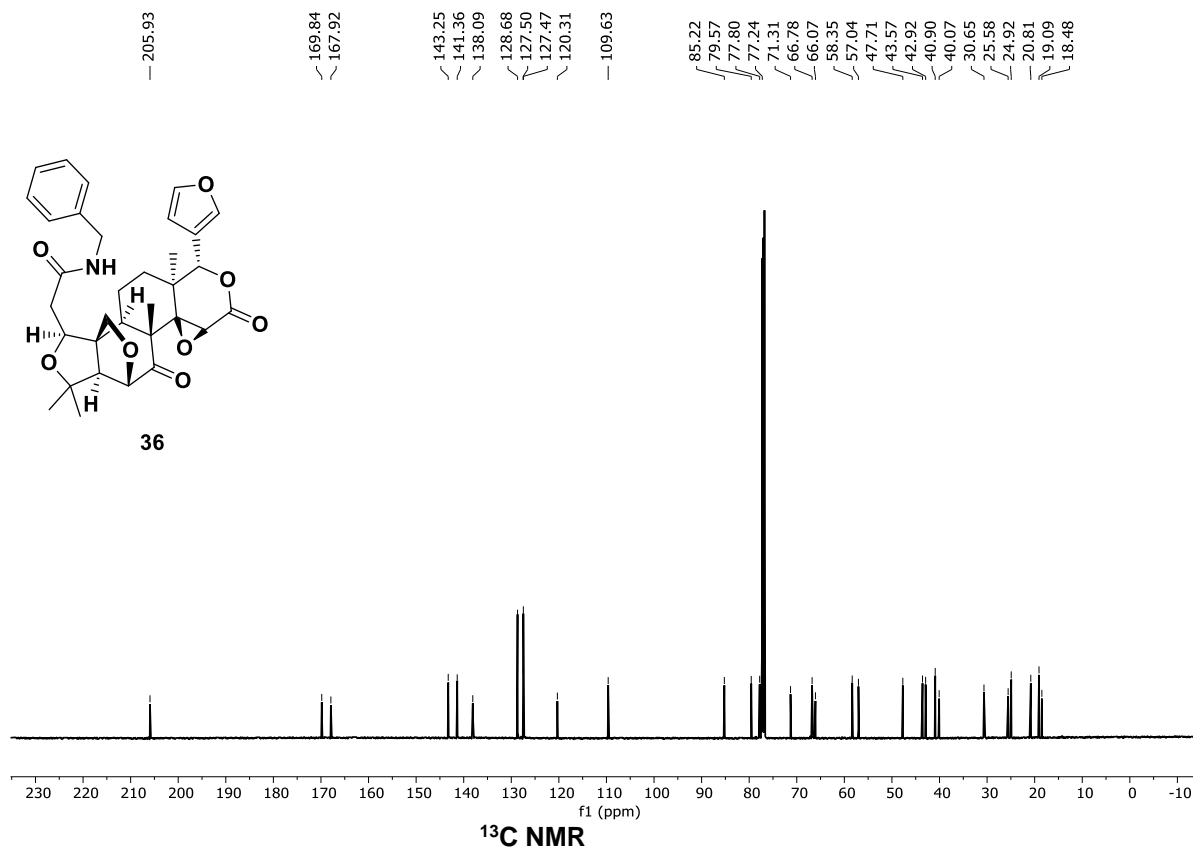



## SUPPORTING INFORMATION

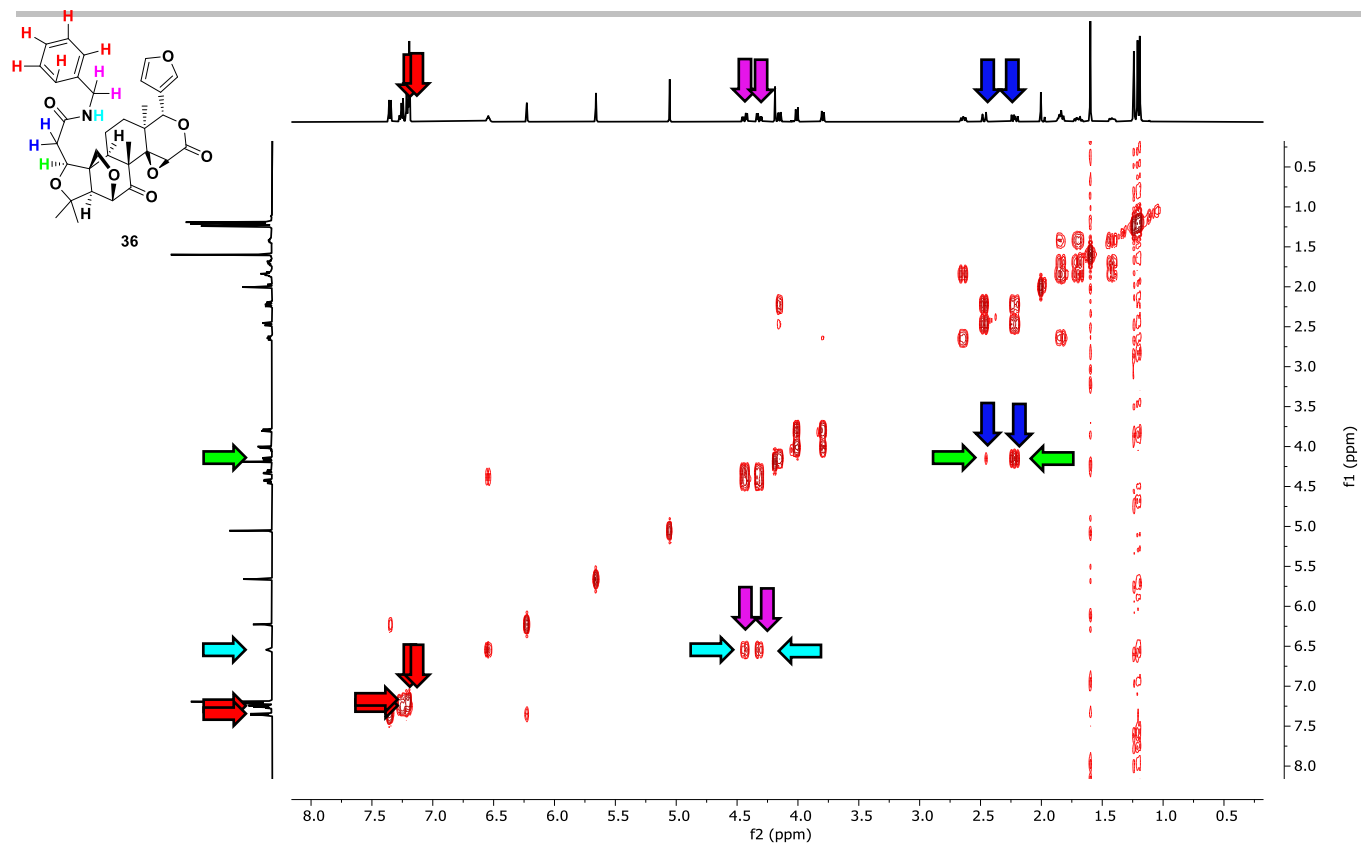 $^1\text{H}$ - $^1\text{H}$  COSY NMR

## SUPPORTING INFORMATION

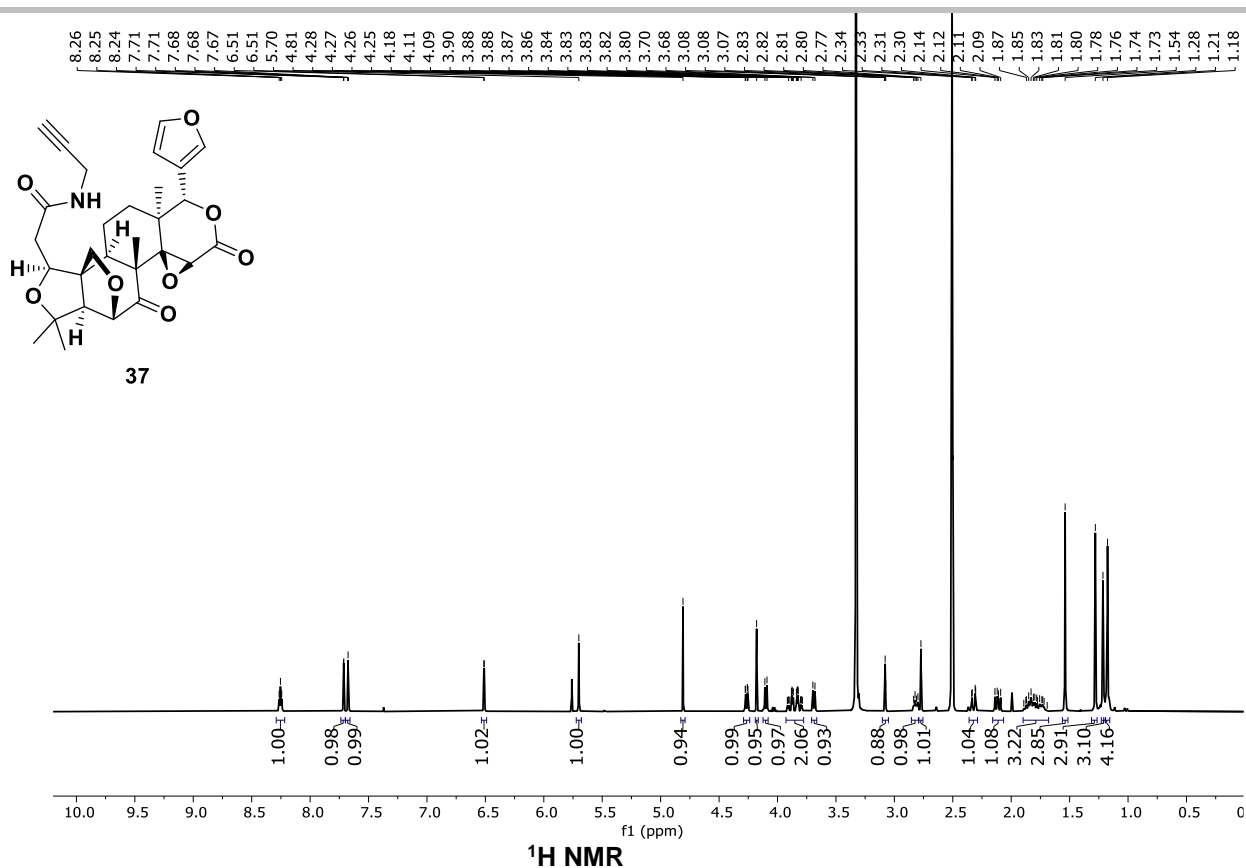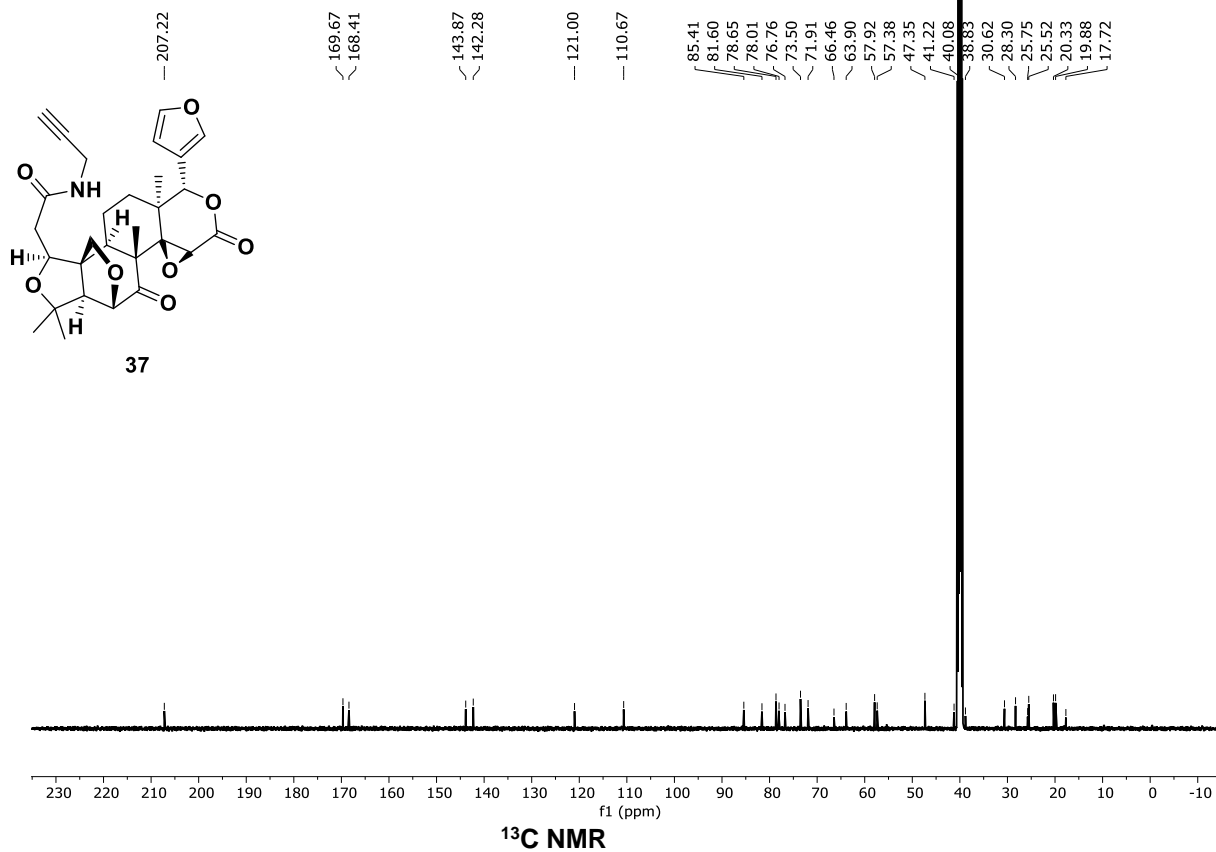

## SUPPORTING INFORMATION

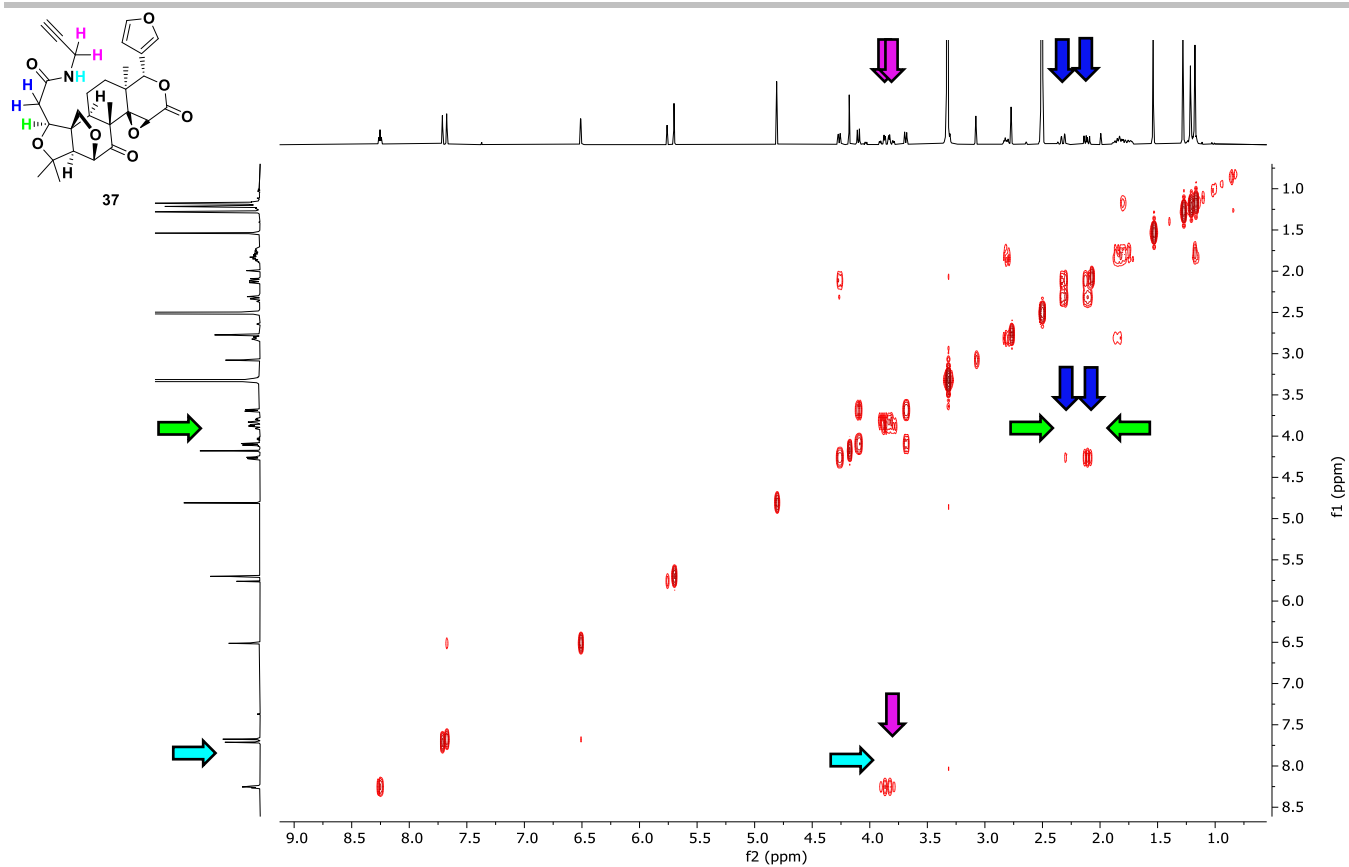

## SUPPORTING INFORMATION

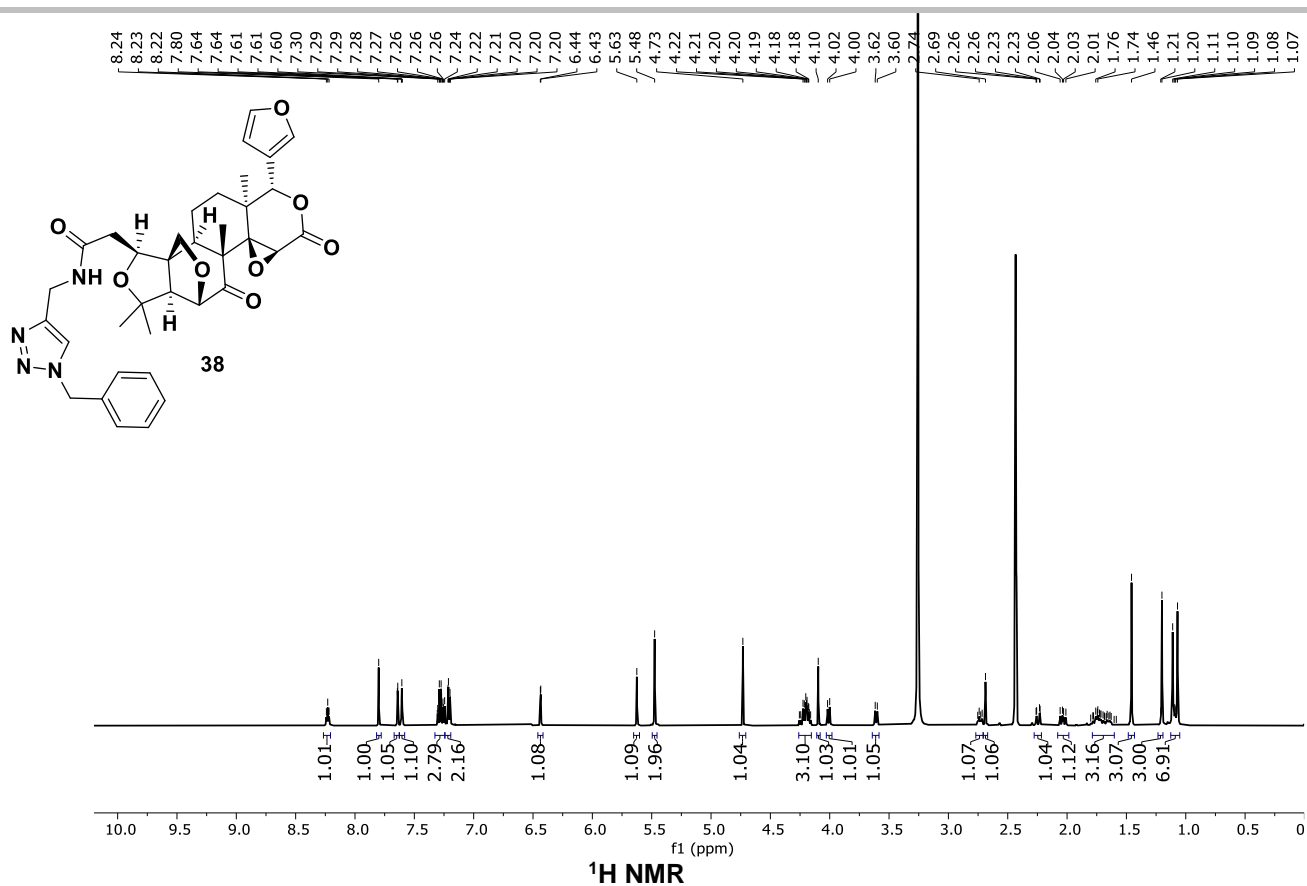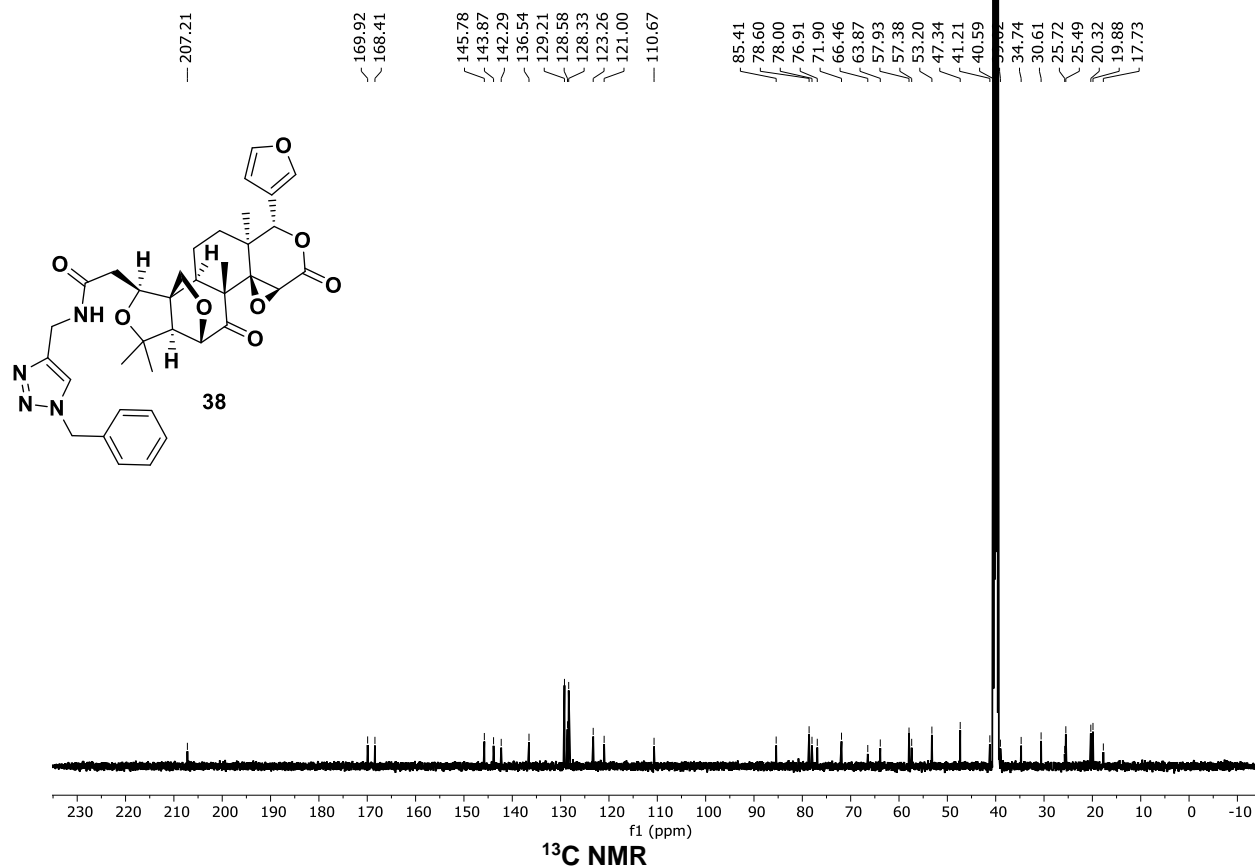

## SUPPORTING INFORMATION

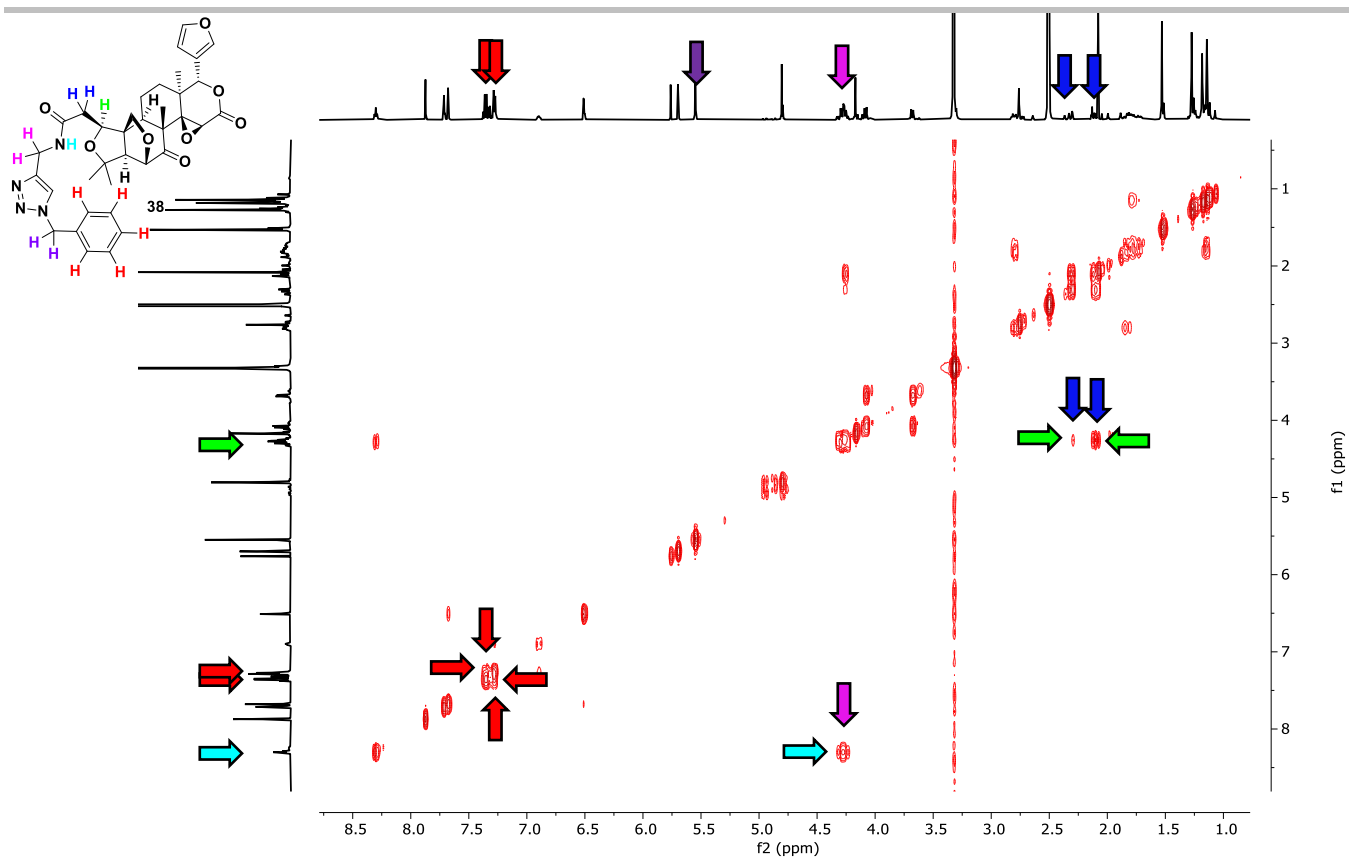 $^1\text{H}$ - $^1\text{H}$  COSY NMR

## SUPPORTING INFORMATION

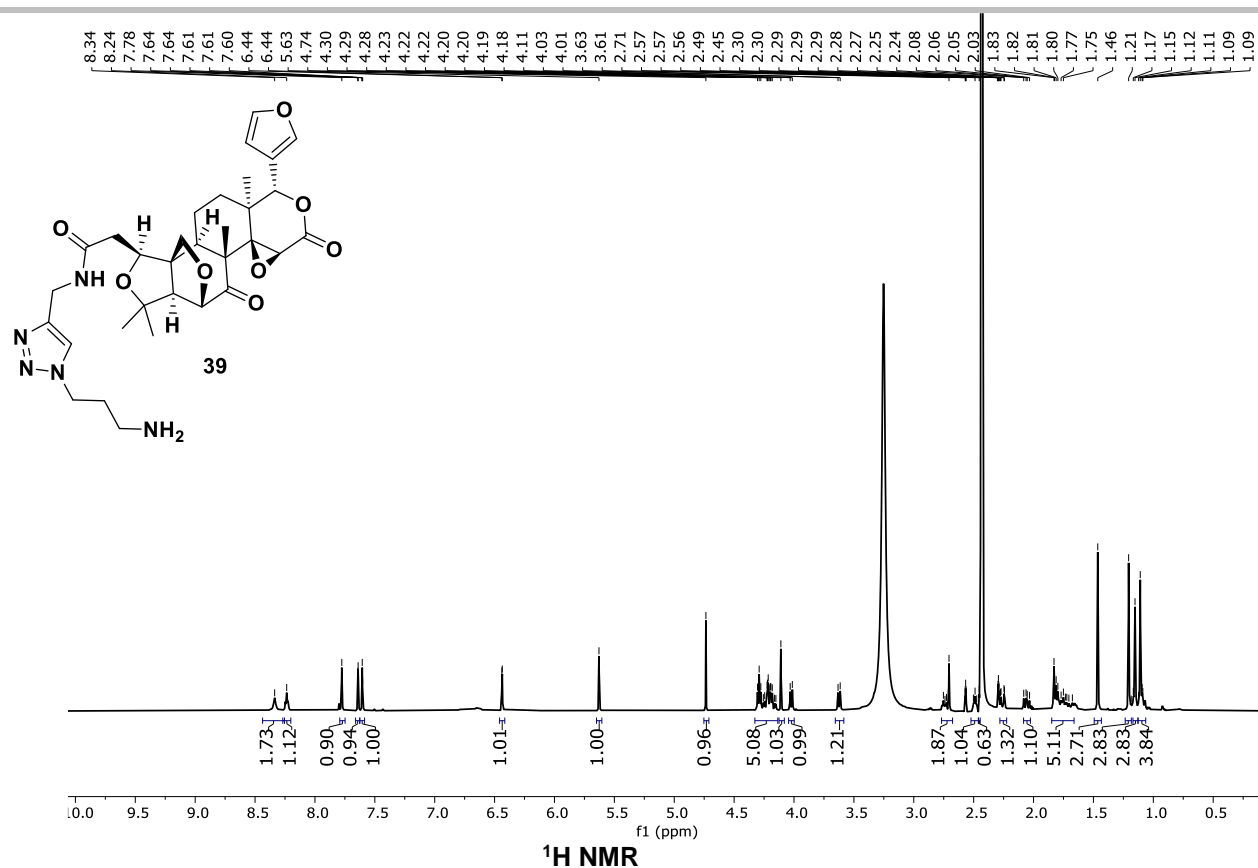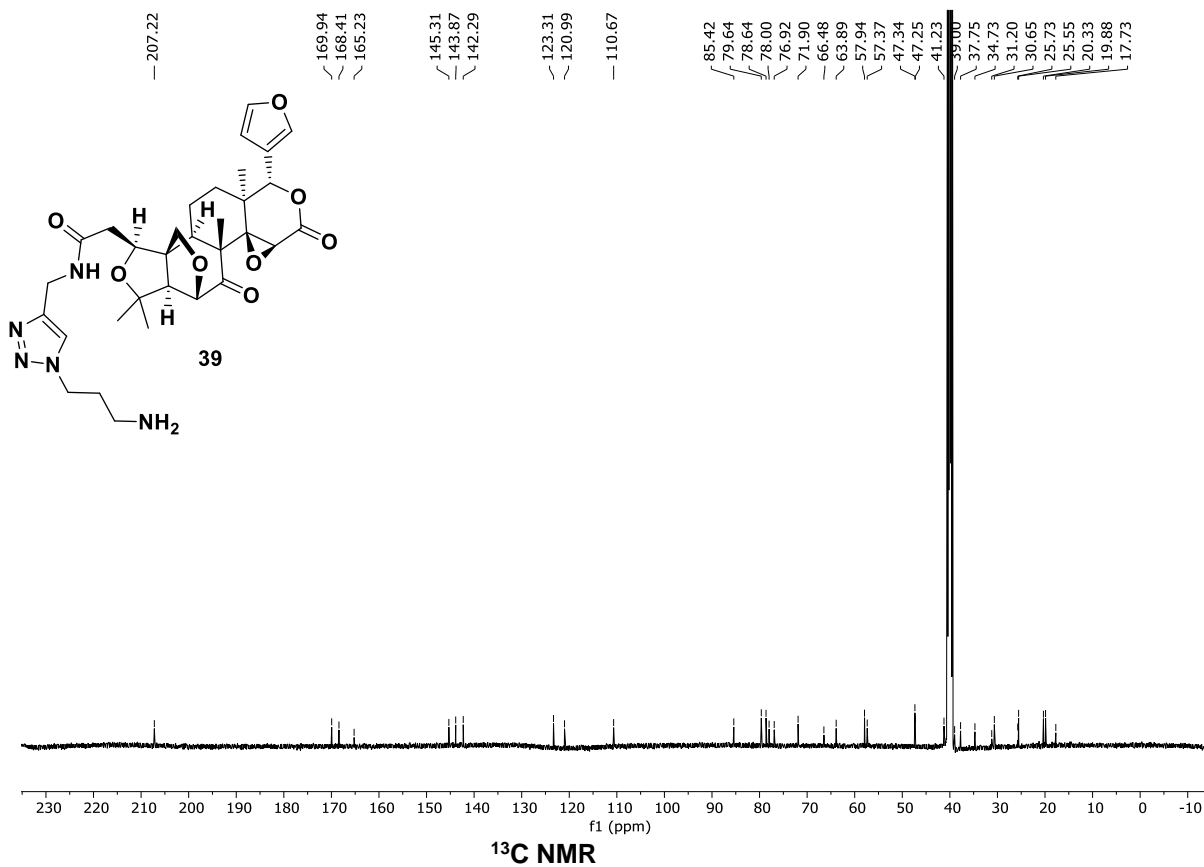

## SUPPORTING INFORMATION

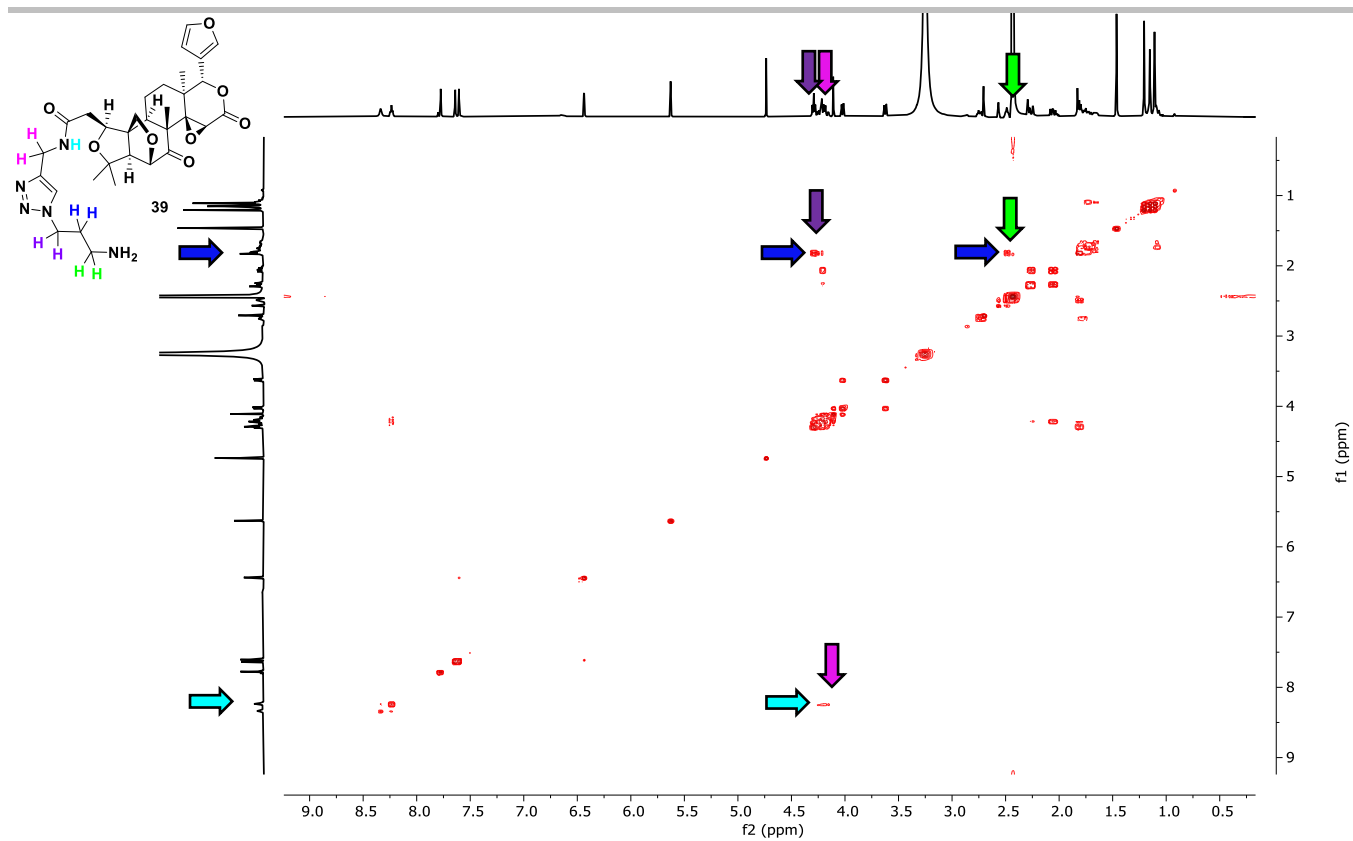 $^1\text{H}$ - $^1\text{H}$  COSY NMR

## SUPPORTING INFORMATION

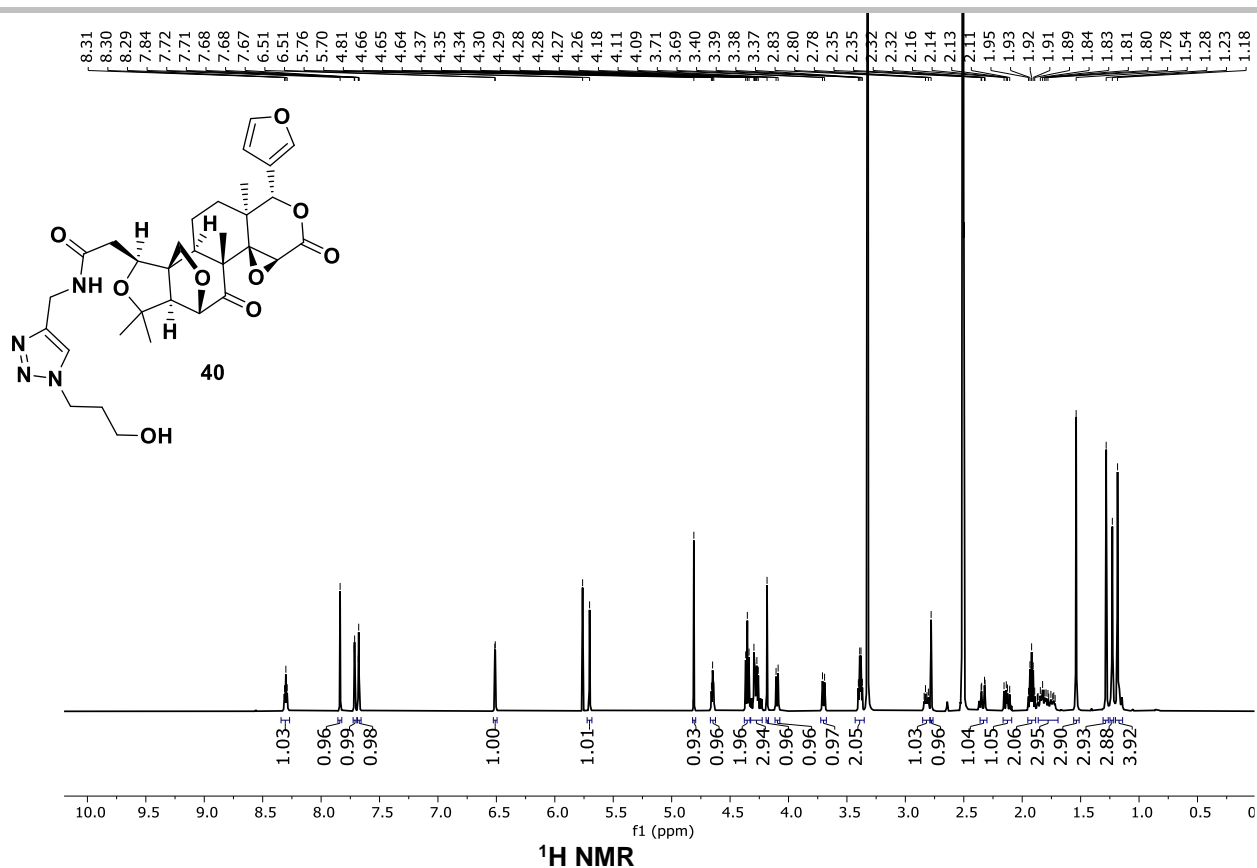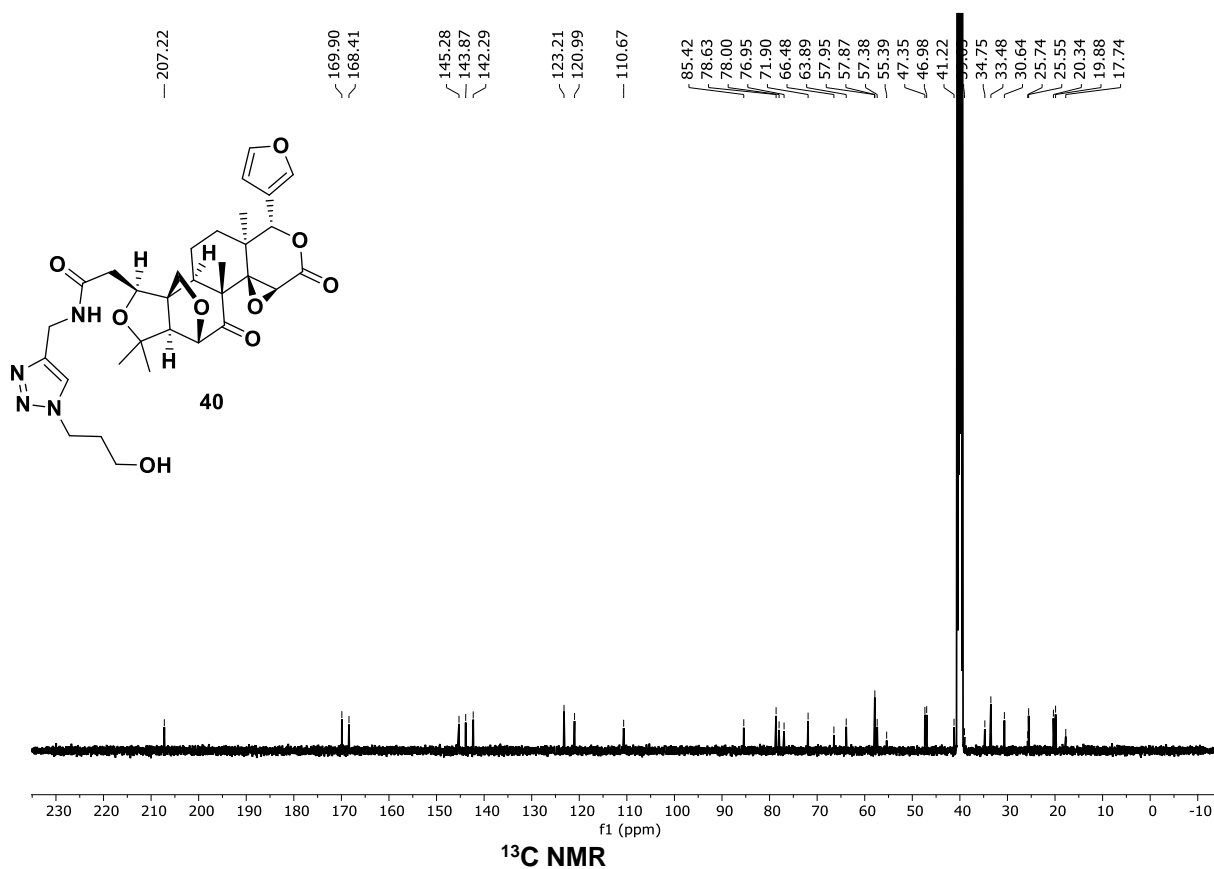



## SUPPORTING INFORMATION

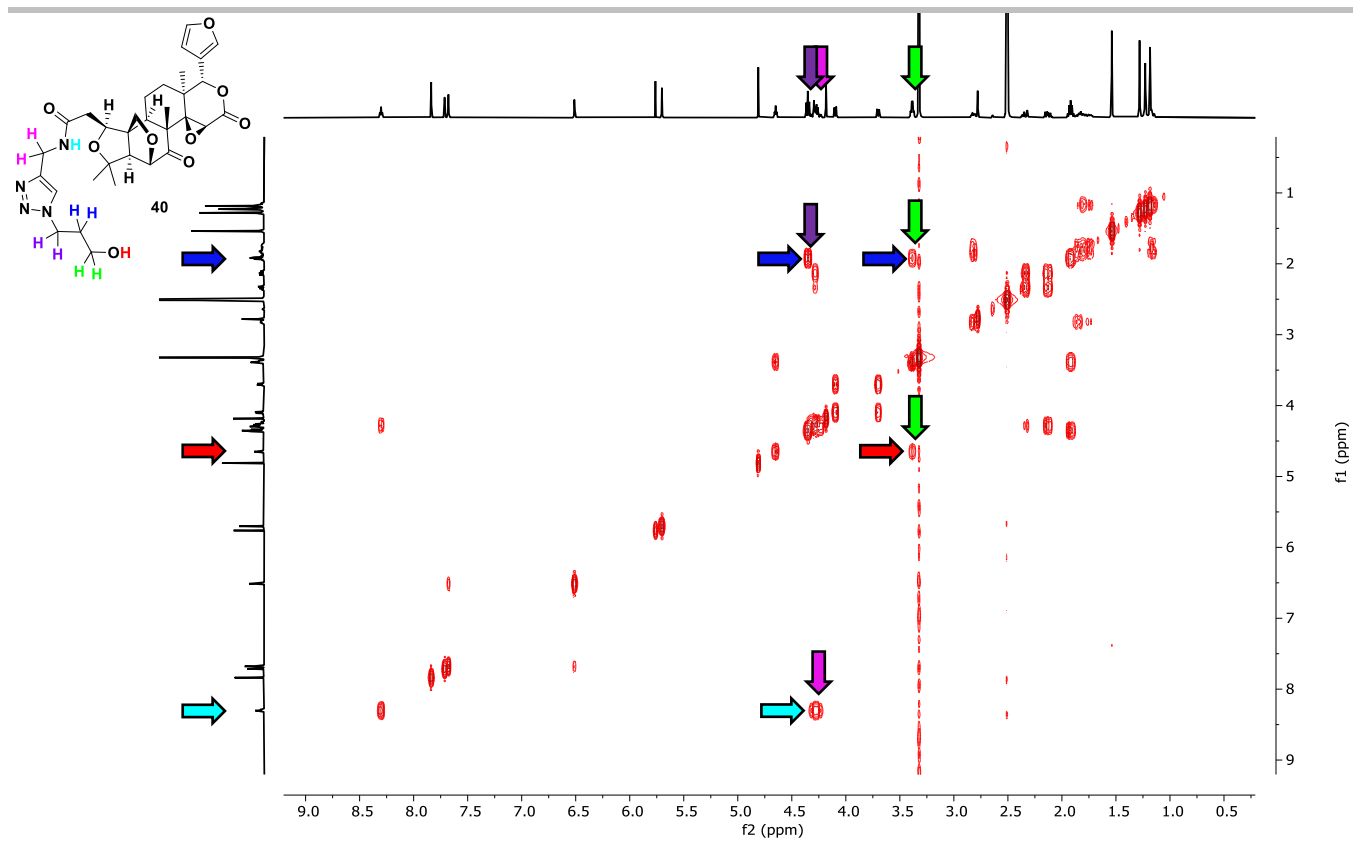

## SUPPORTING INFORMATION

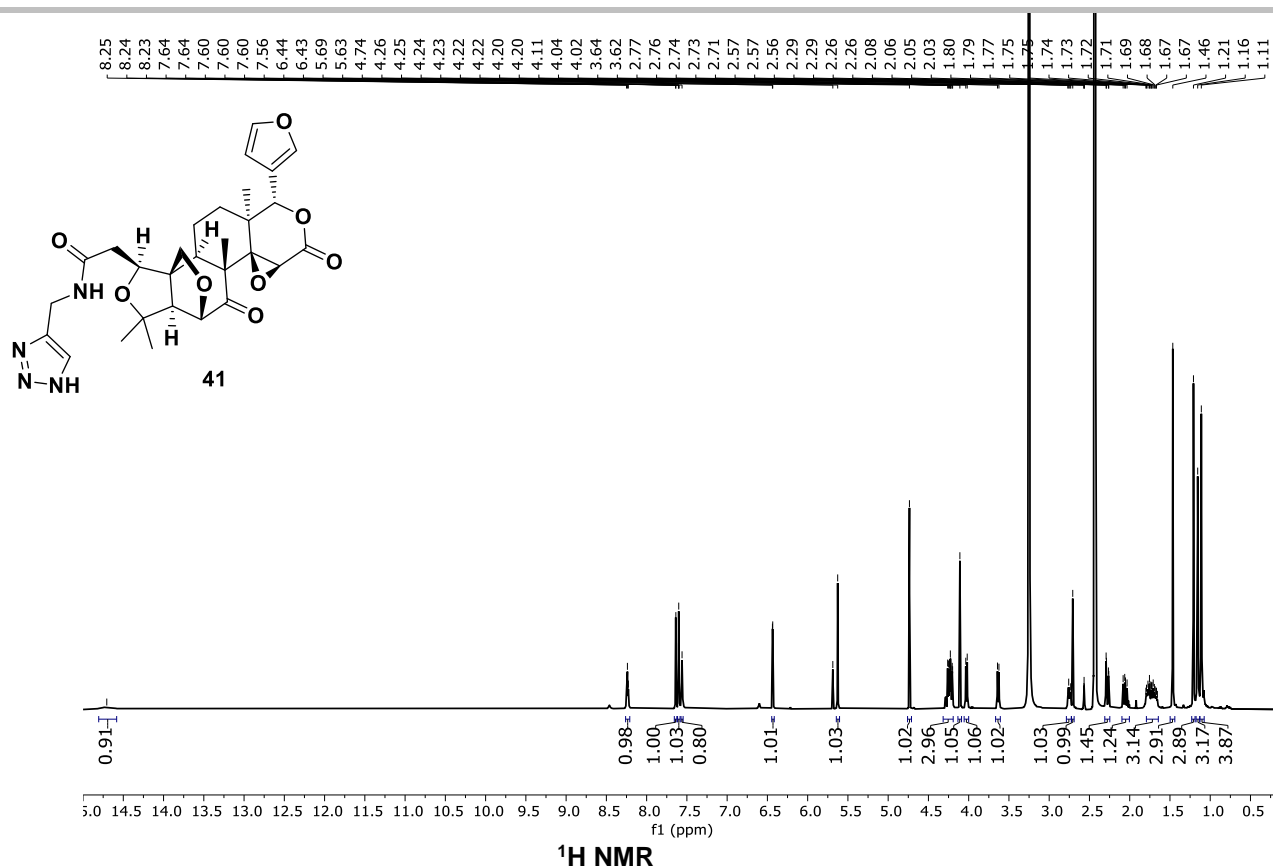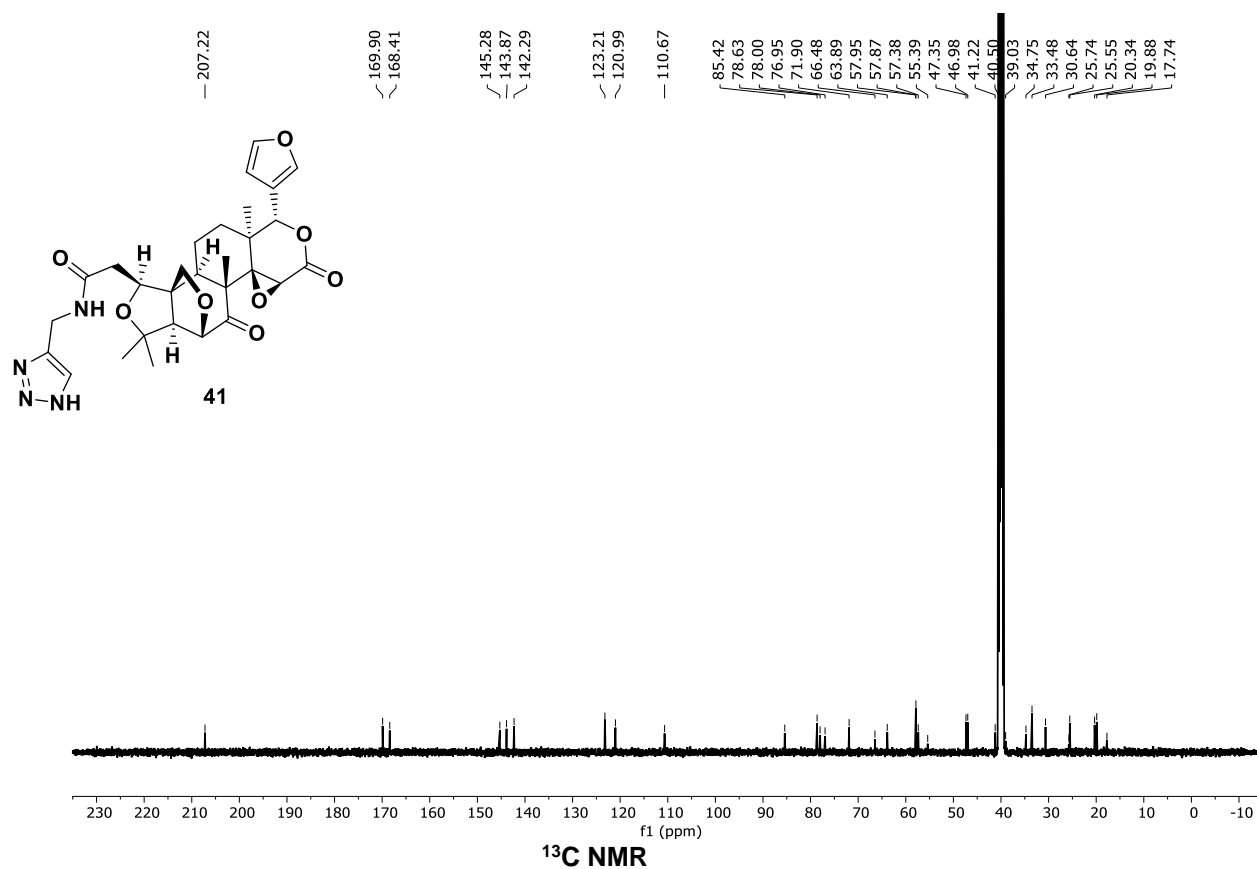

## SUPPORTING INFORMATION

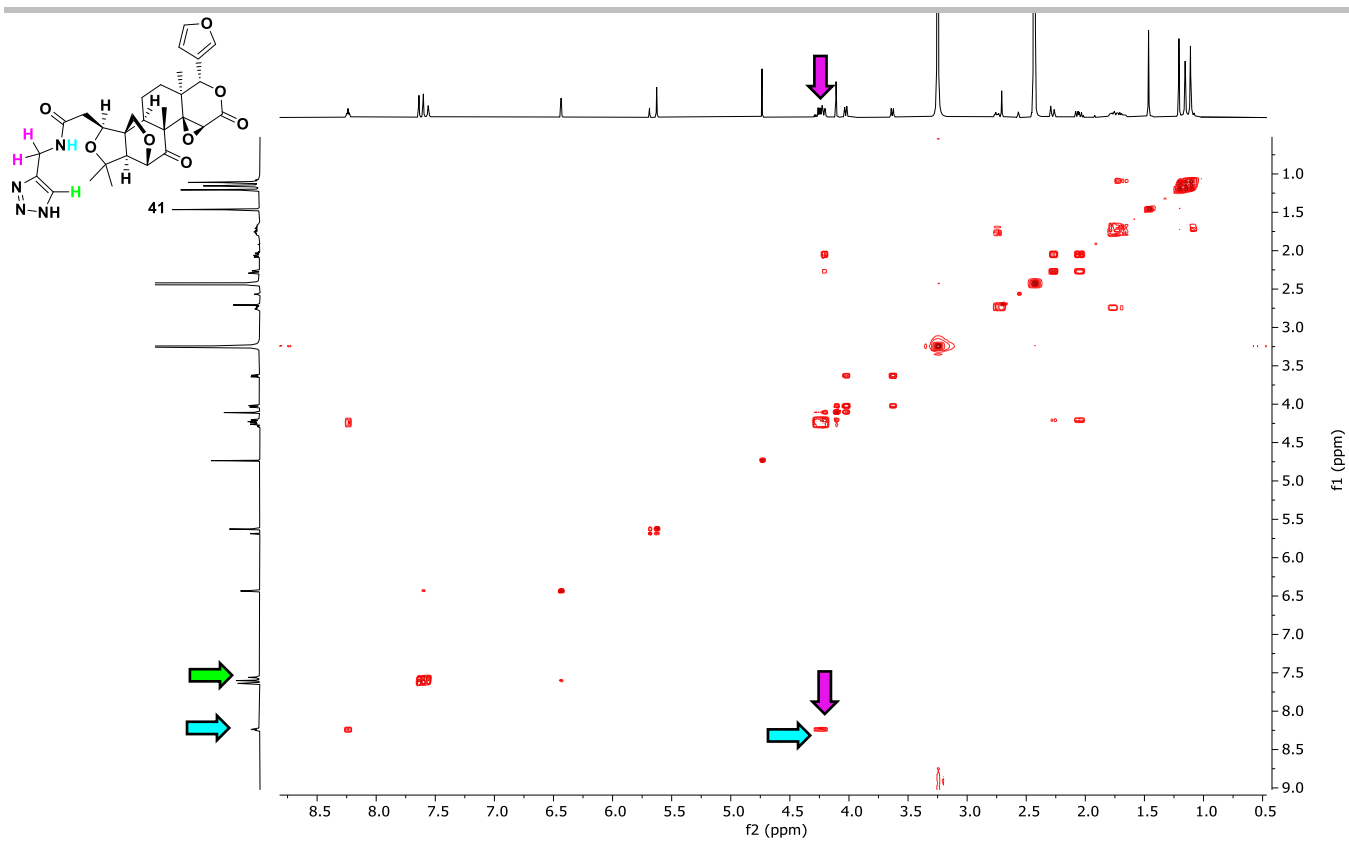

## SUPPORTING INFORMATION

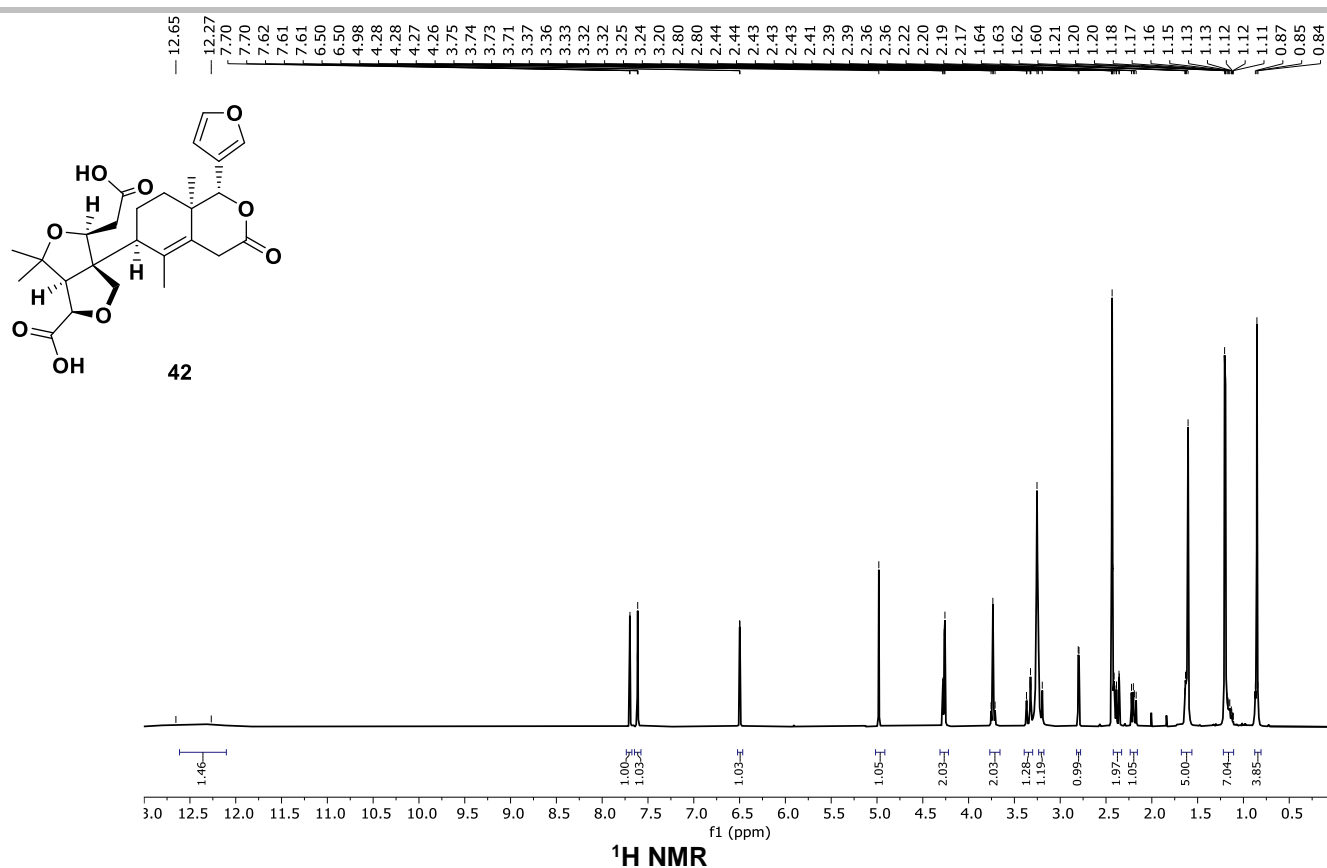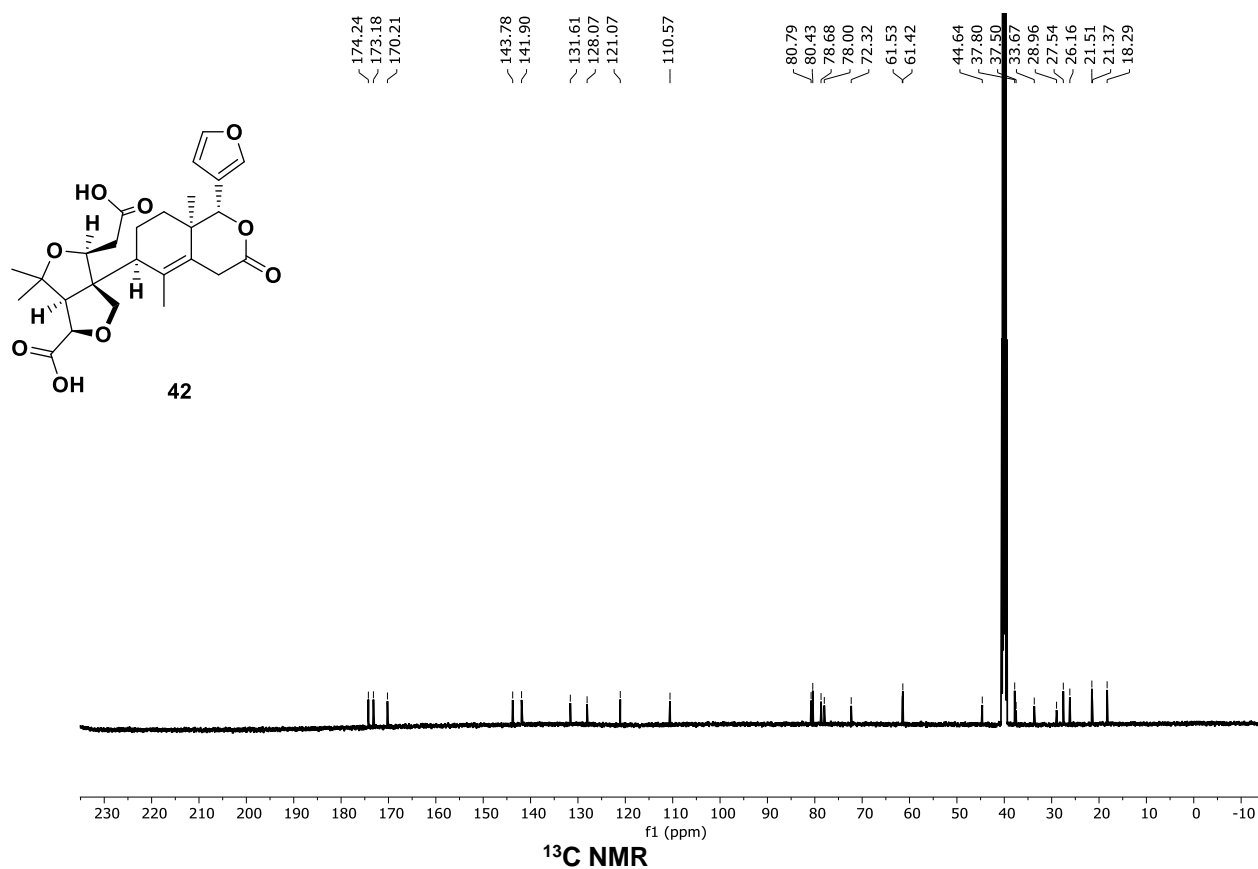

## SUPPORTING INFORMATION

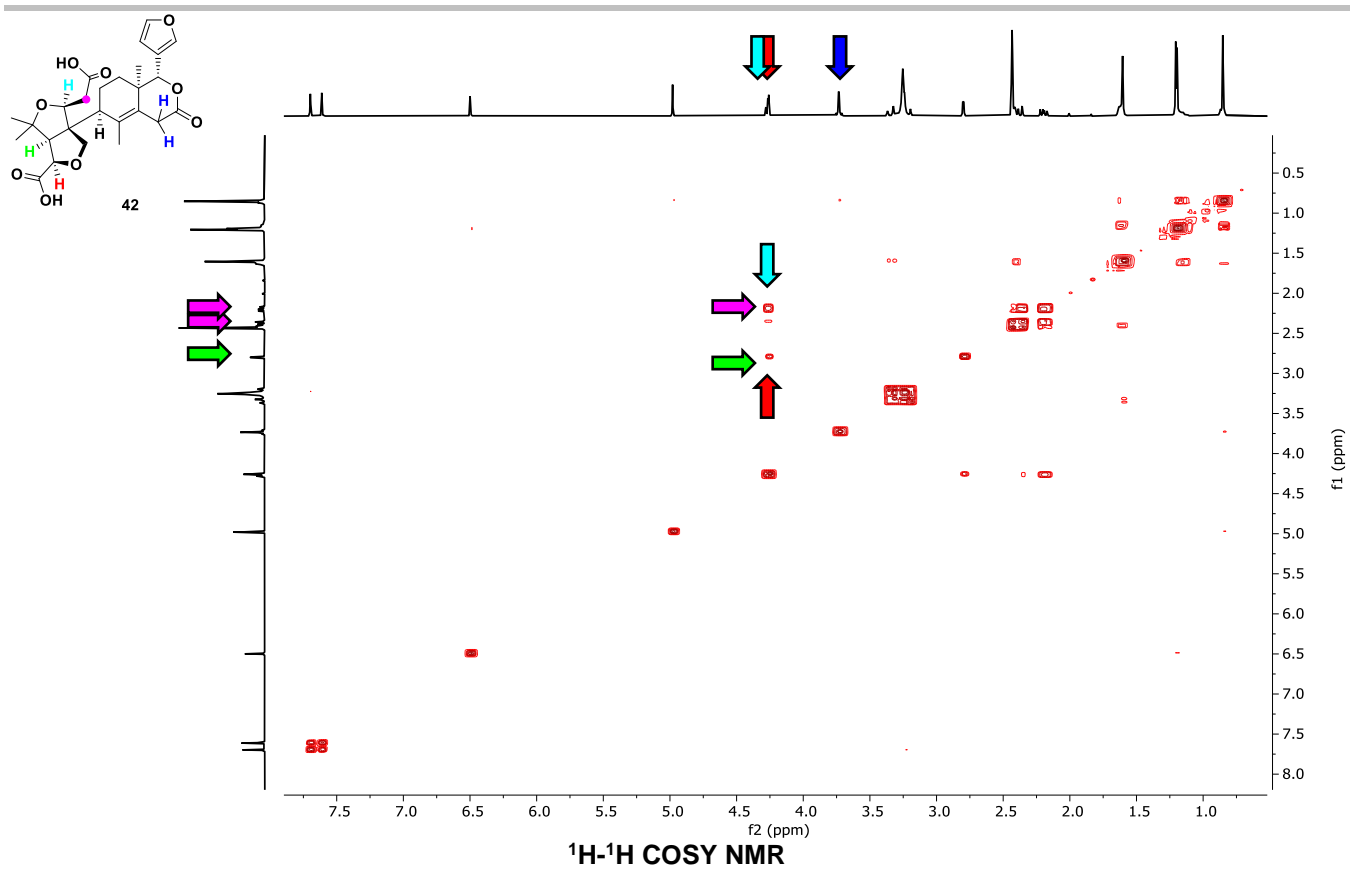

## SUPPORTING INFORMATION

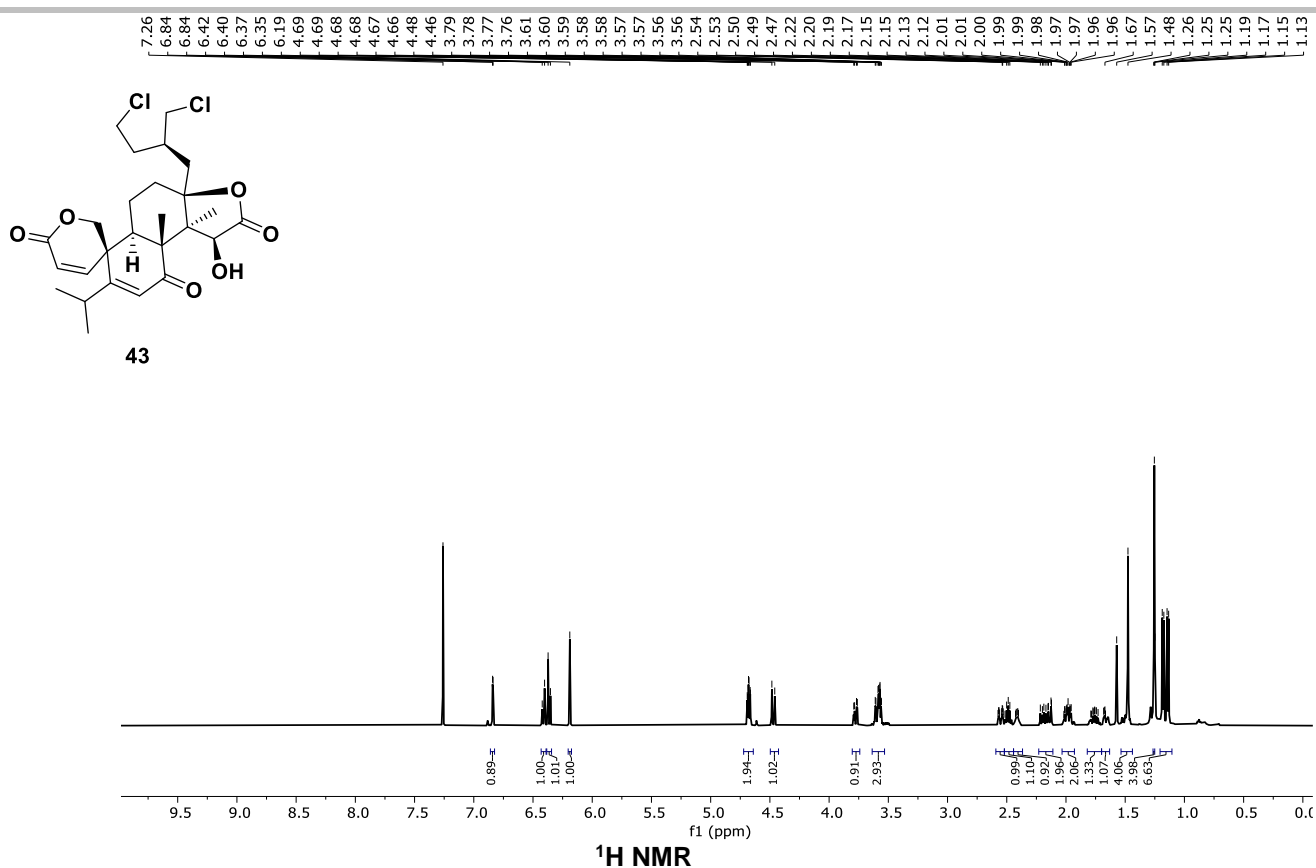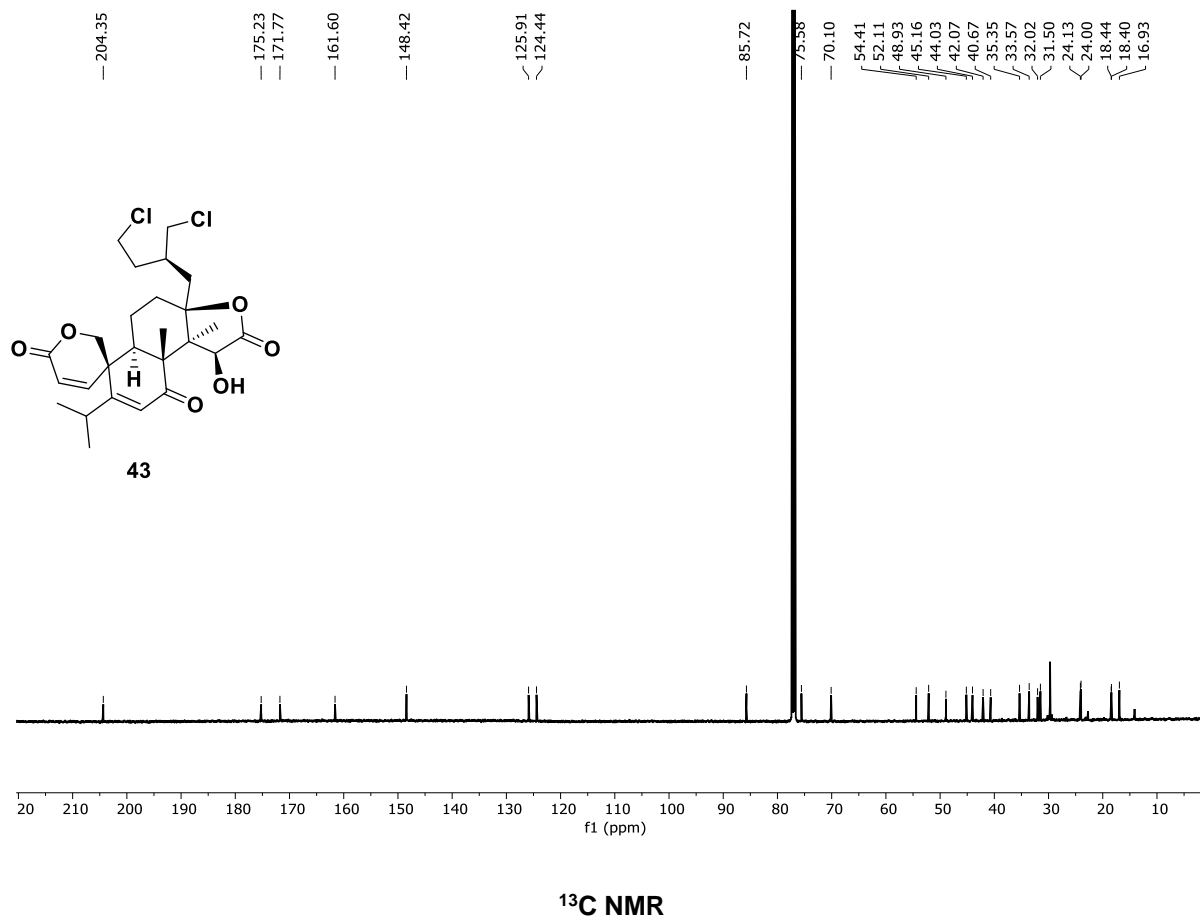

## SUPPORTING INFORMATION

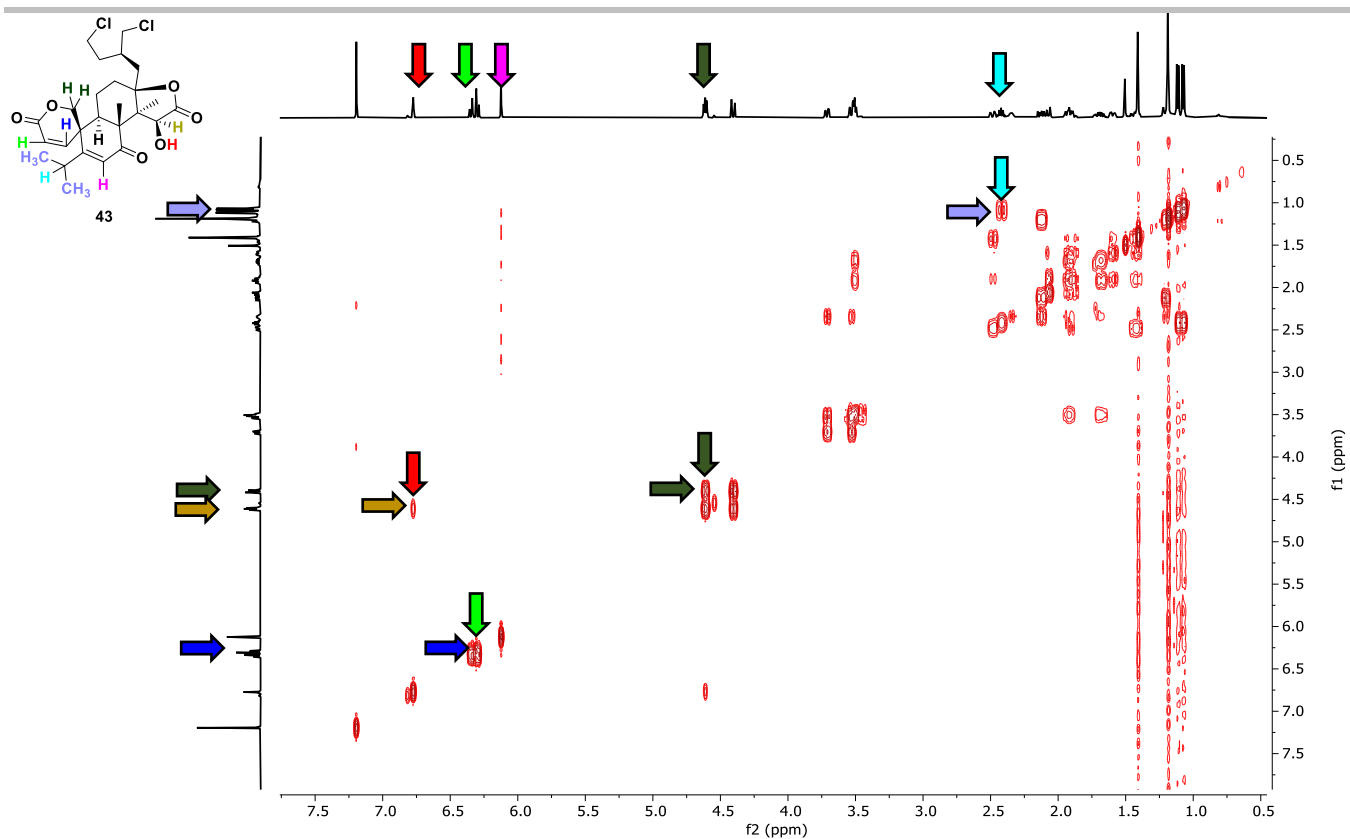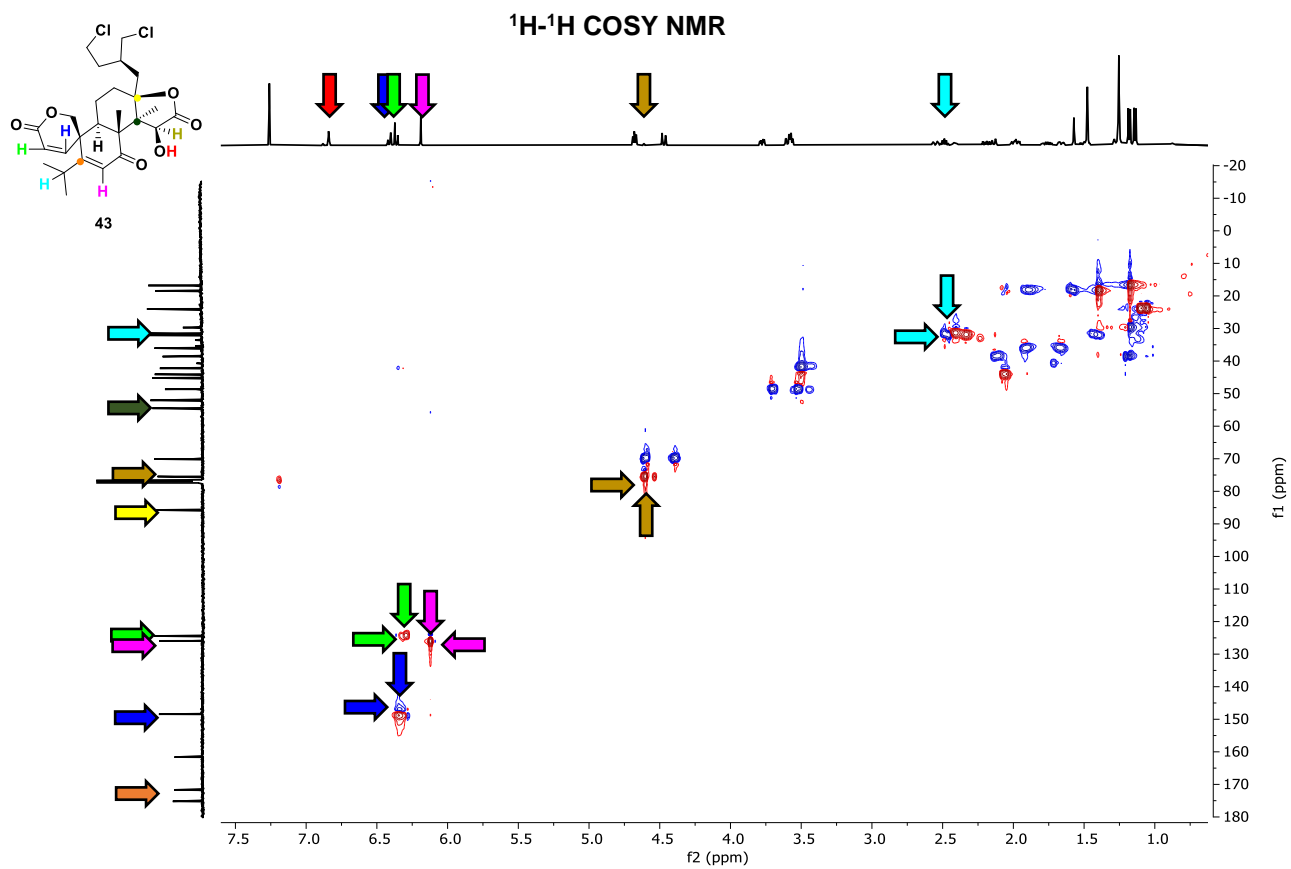

## SUPPORTING INFORMATION

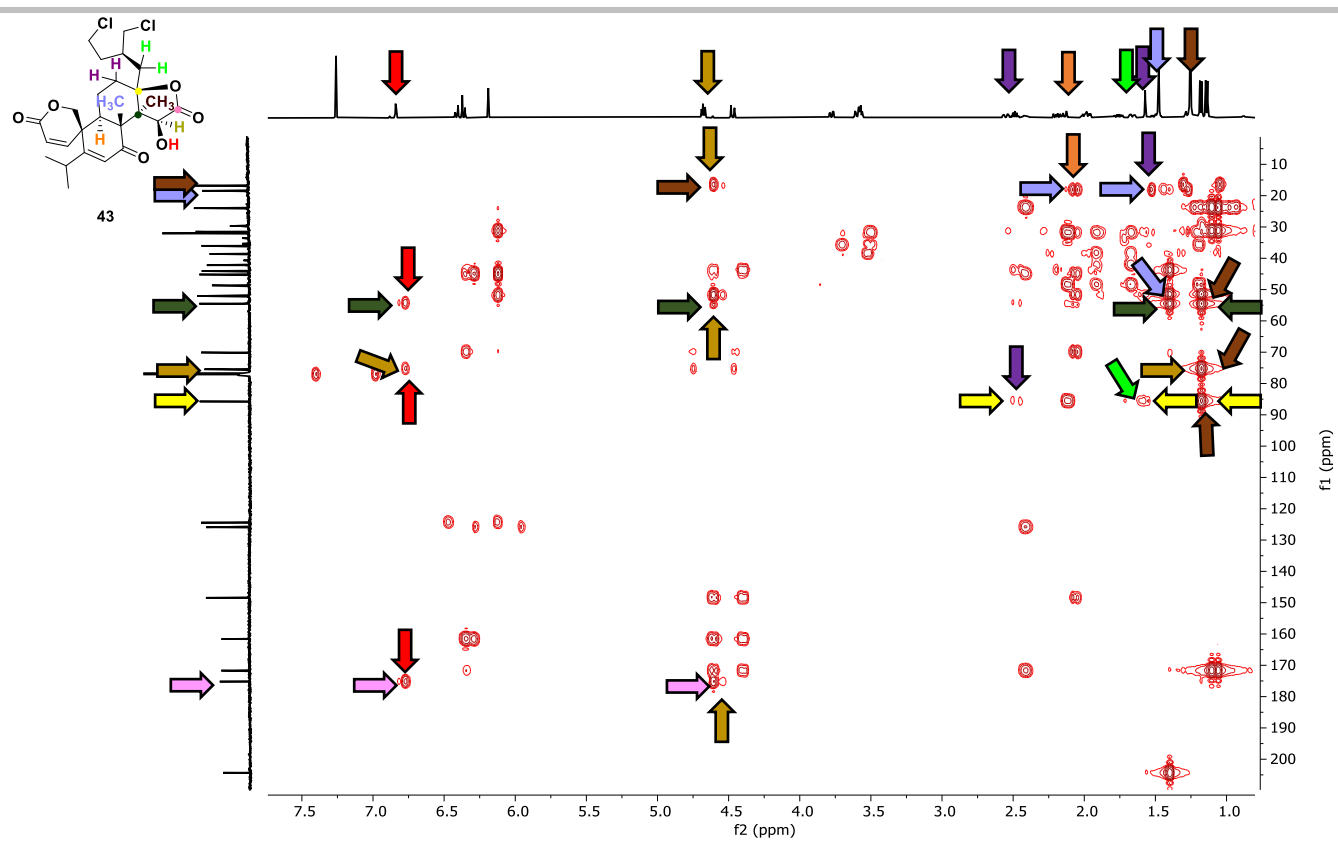 $^1\text{H}$ - $^{13}\text{C}$  HMBC NMR



## SUPPORTING INFORMATION

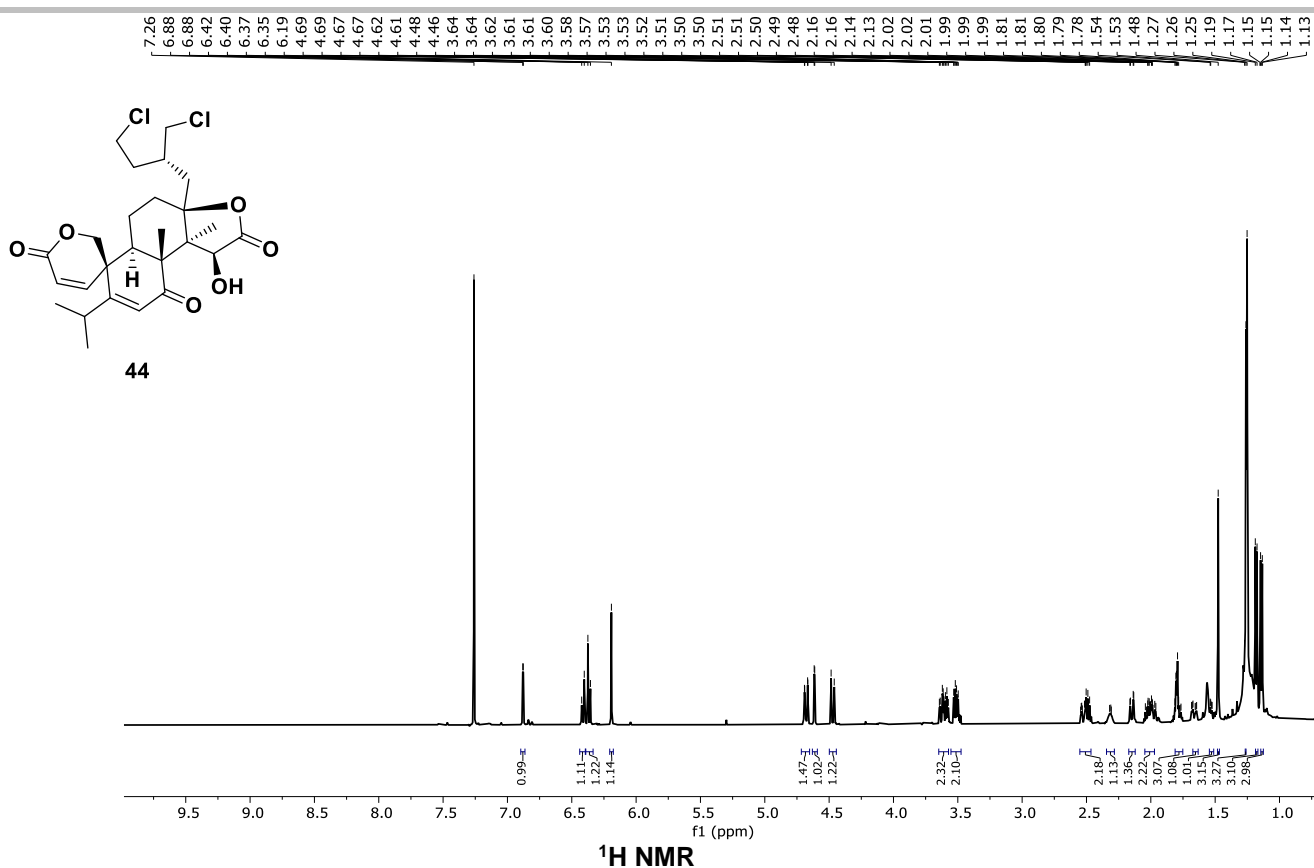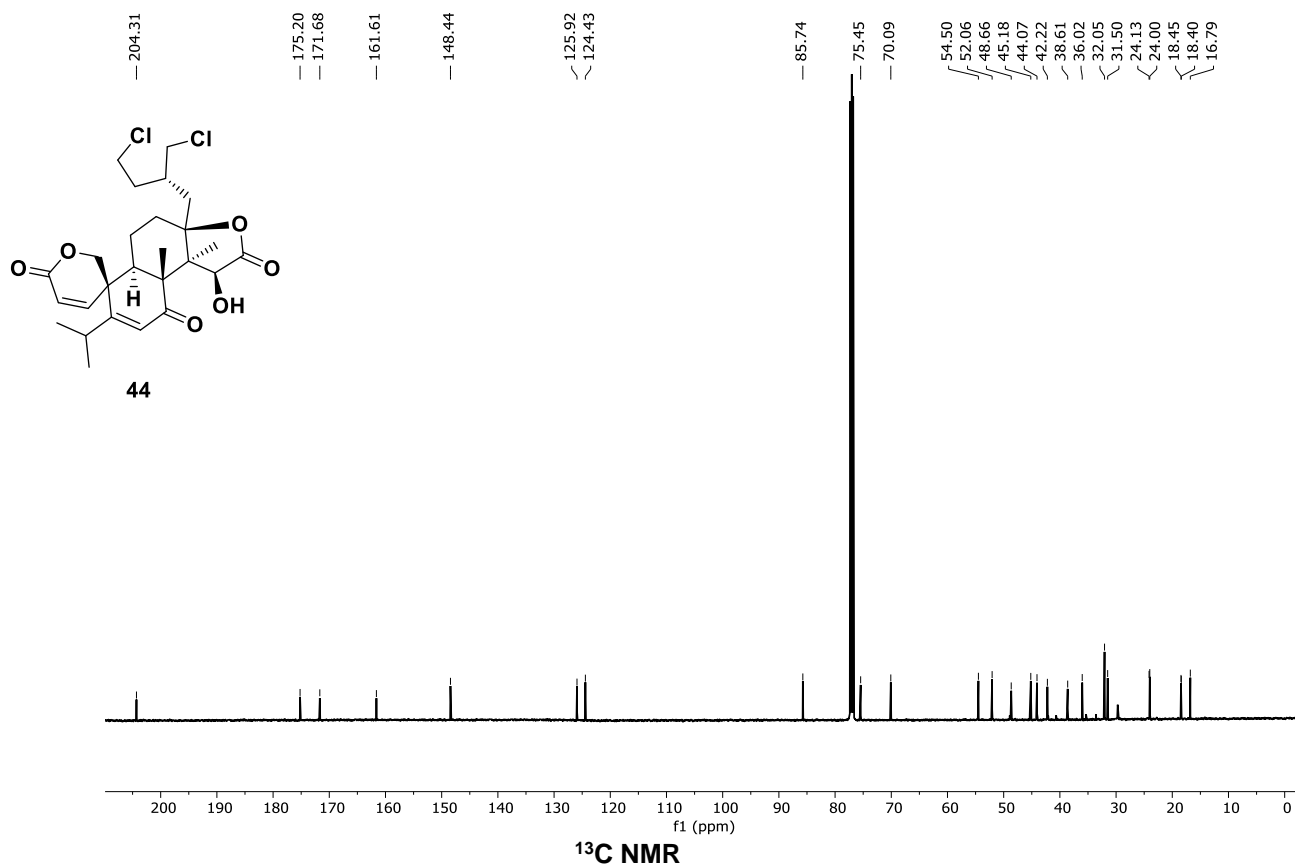

## SUPPORTING INFORMATION

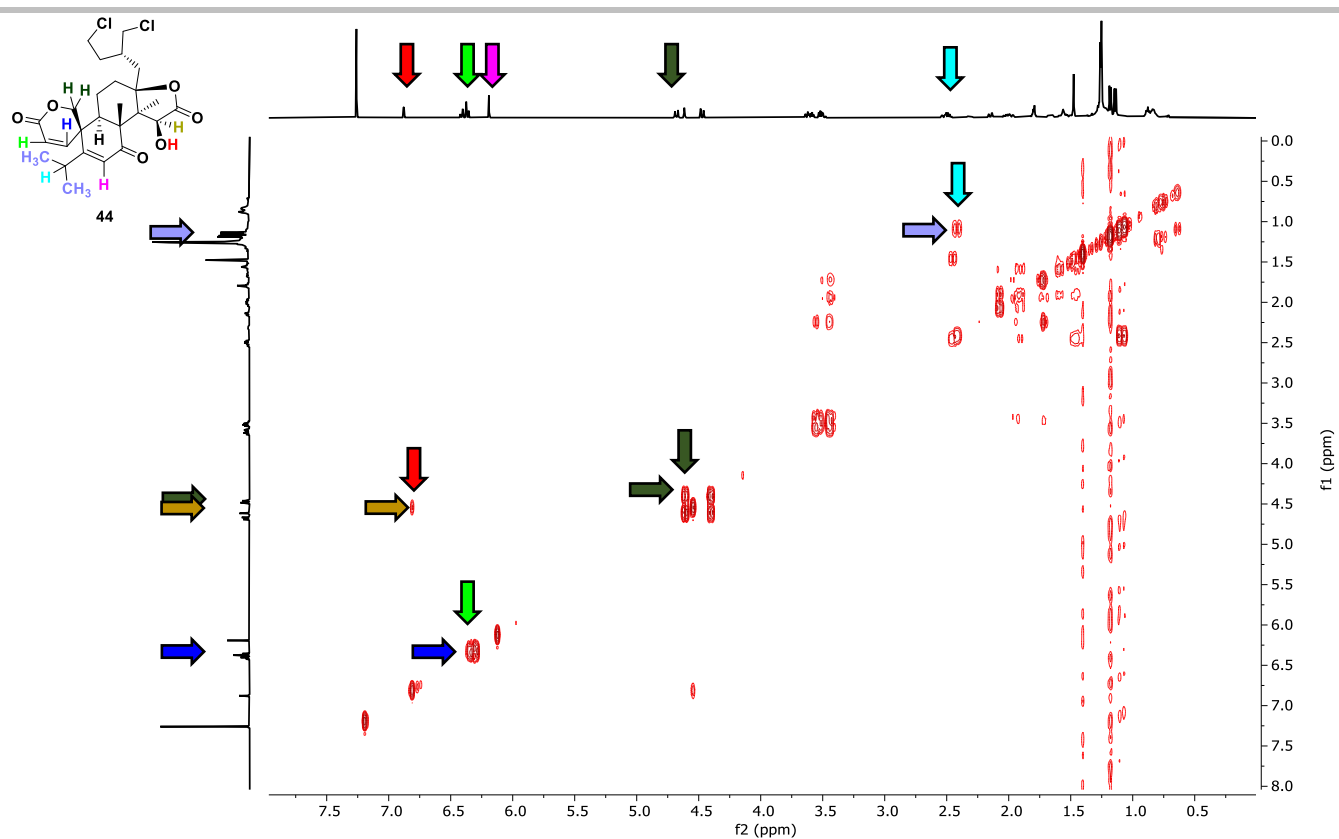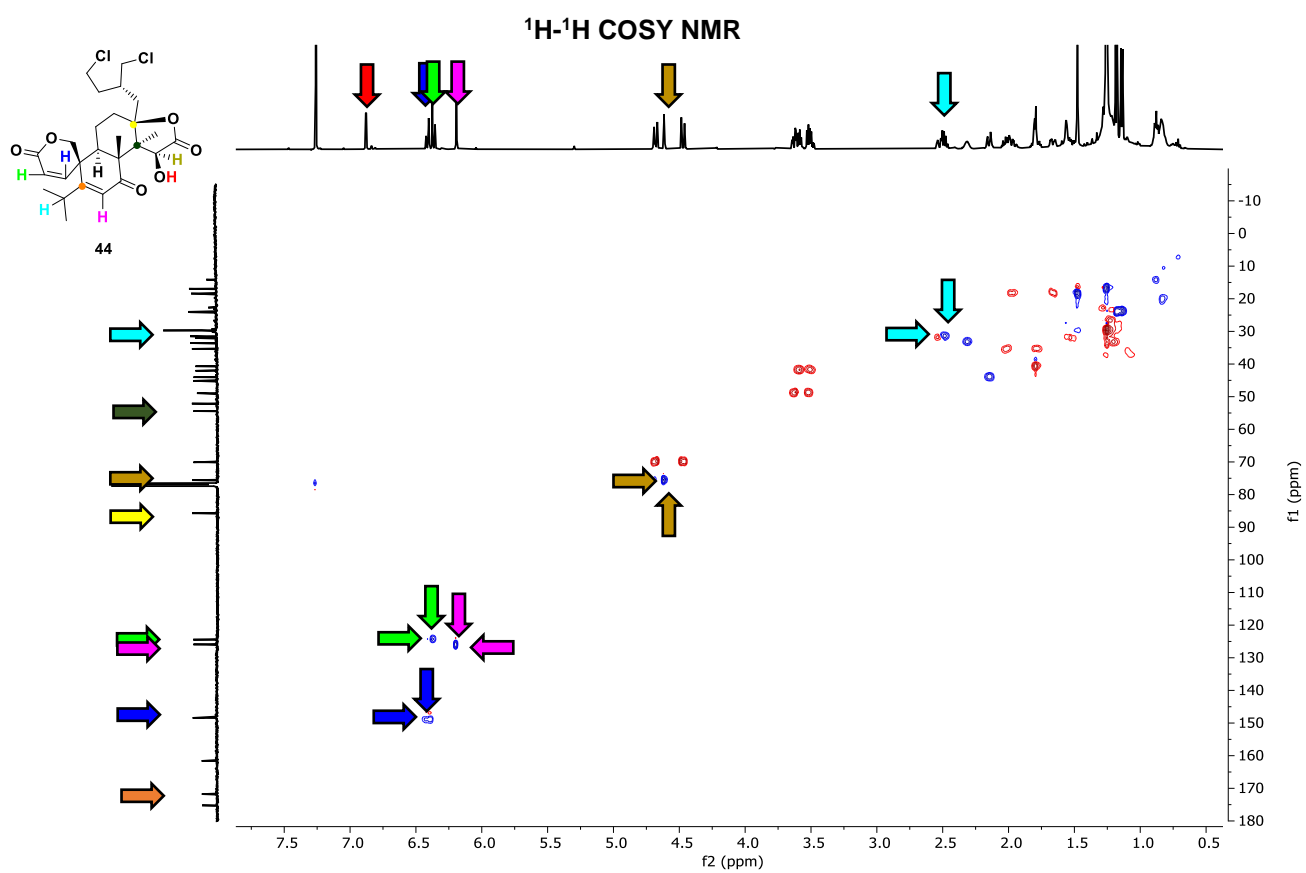

## SUPPORTING INFORMATION

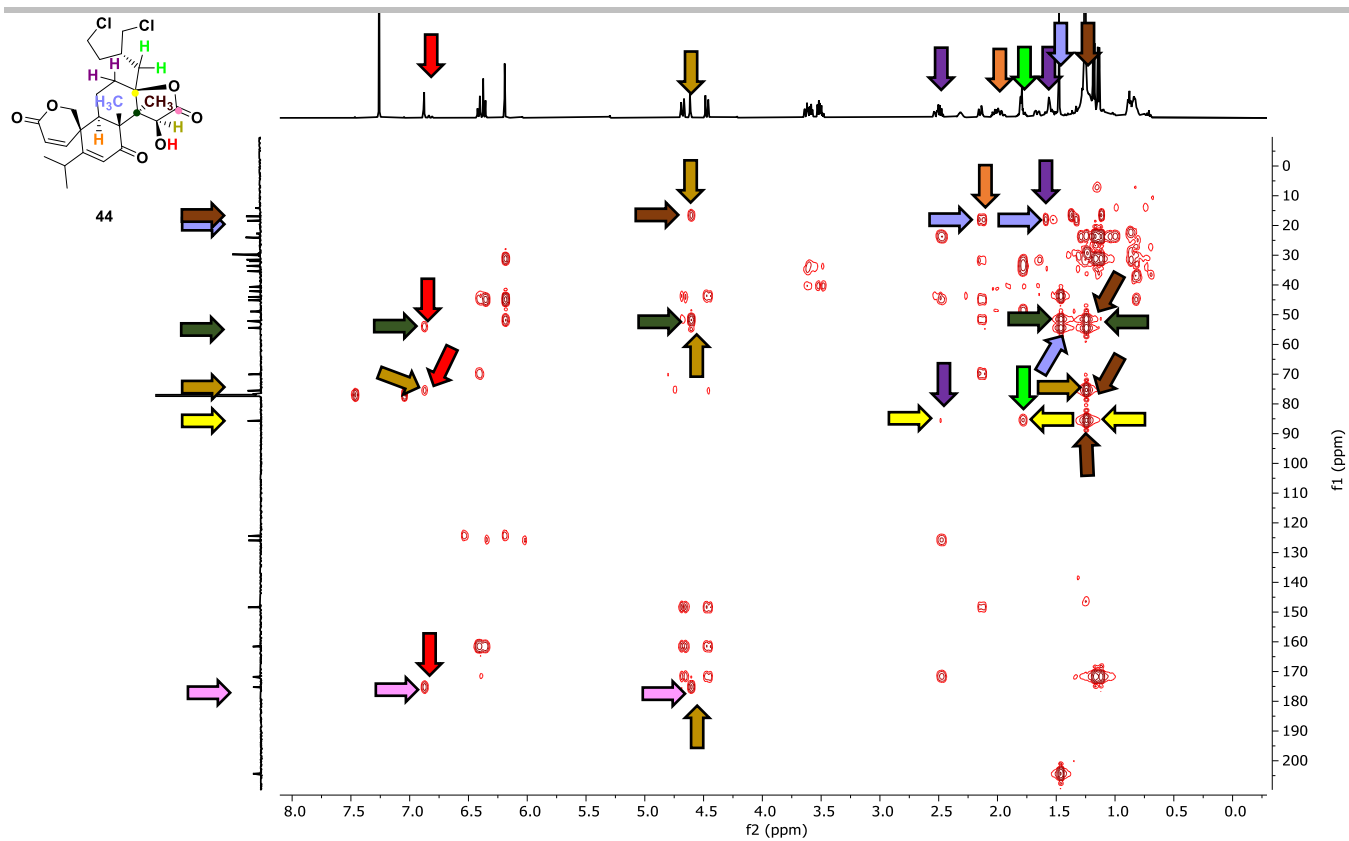

## SUPPORTING INFORMATION

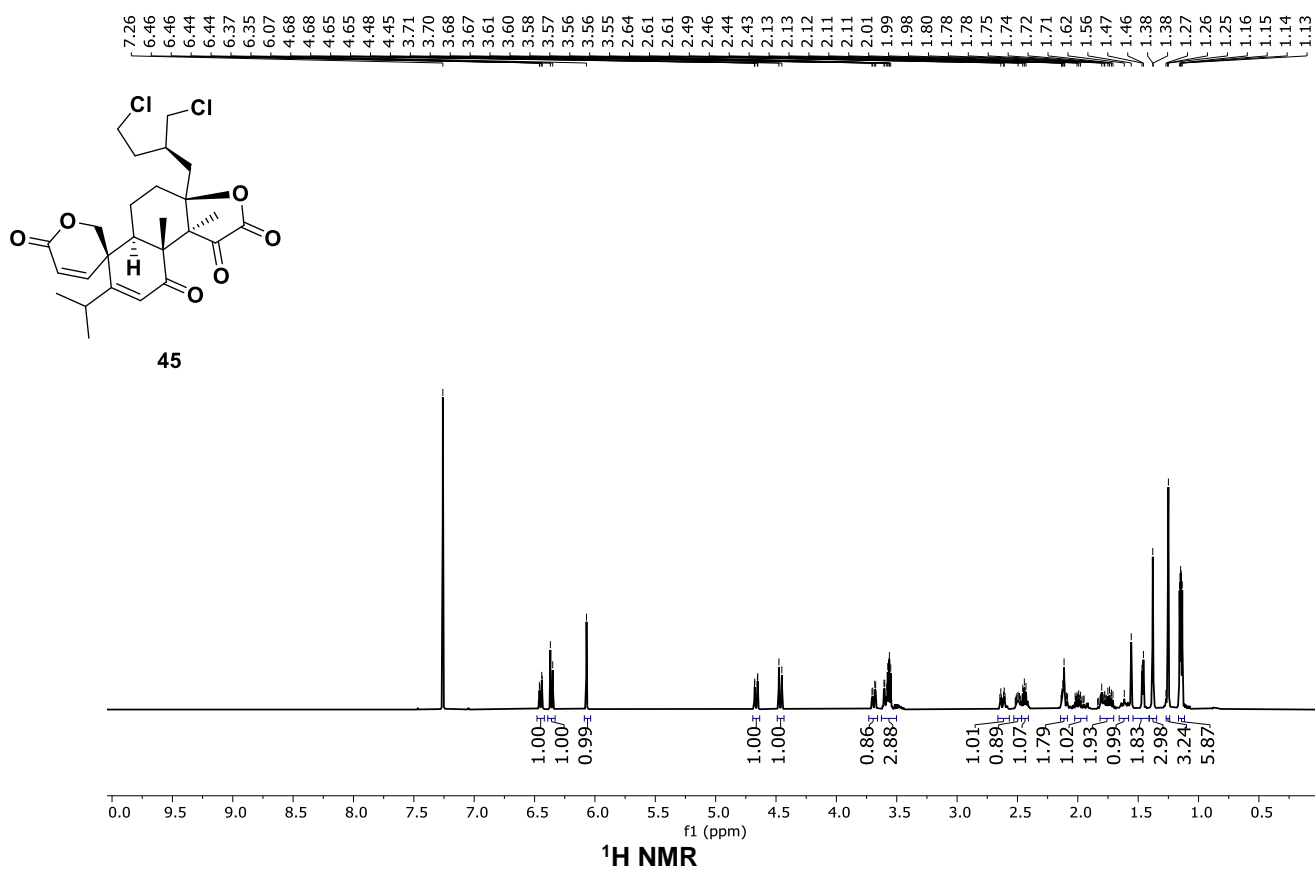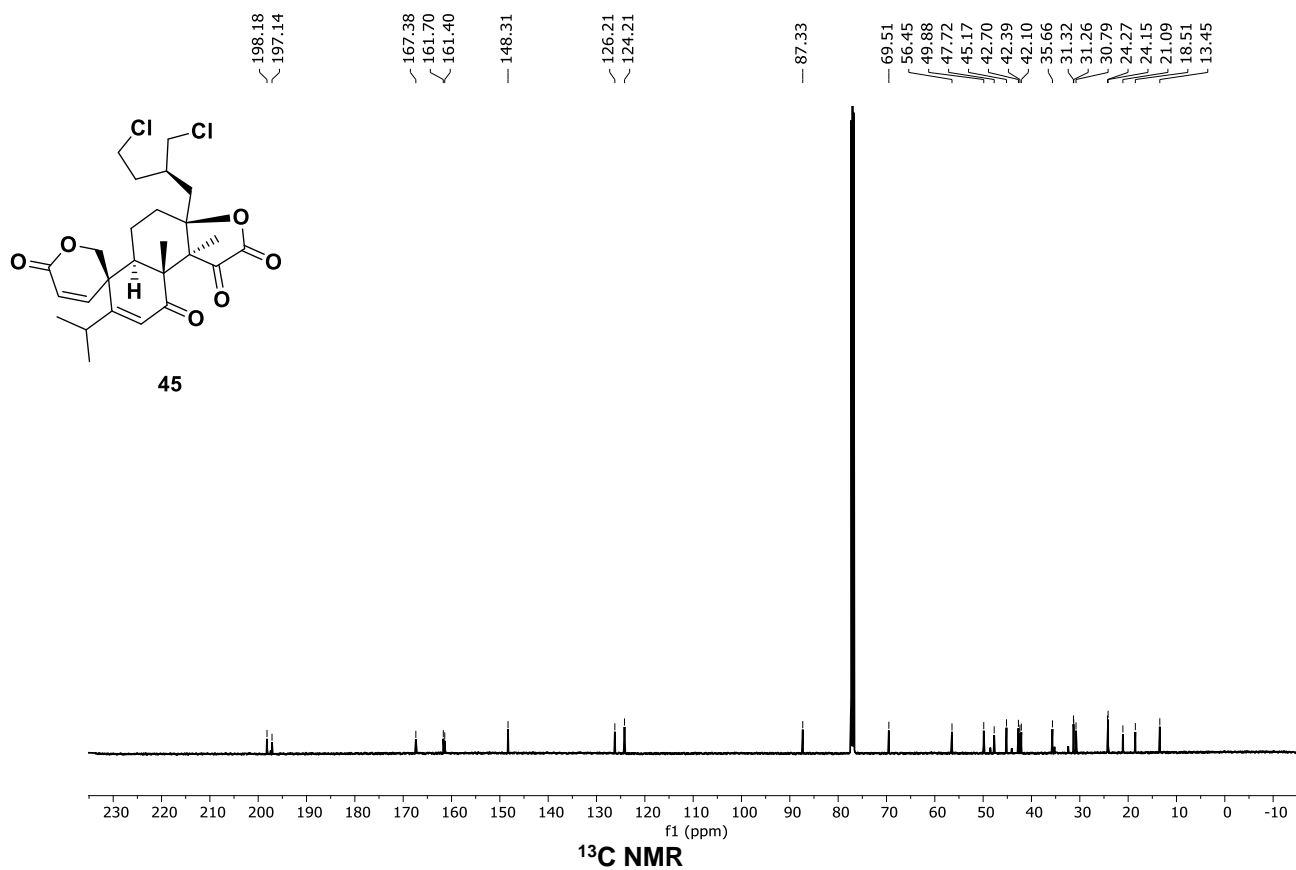

## SUPPORTING INFORMATION

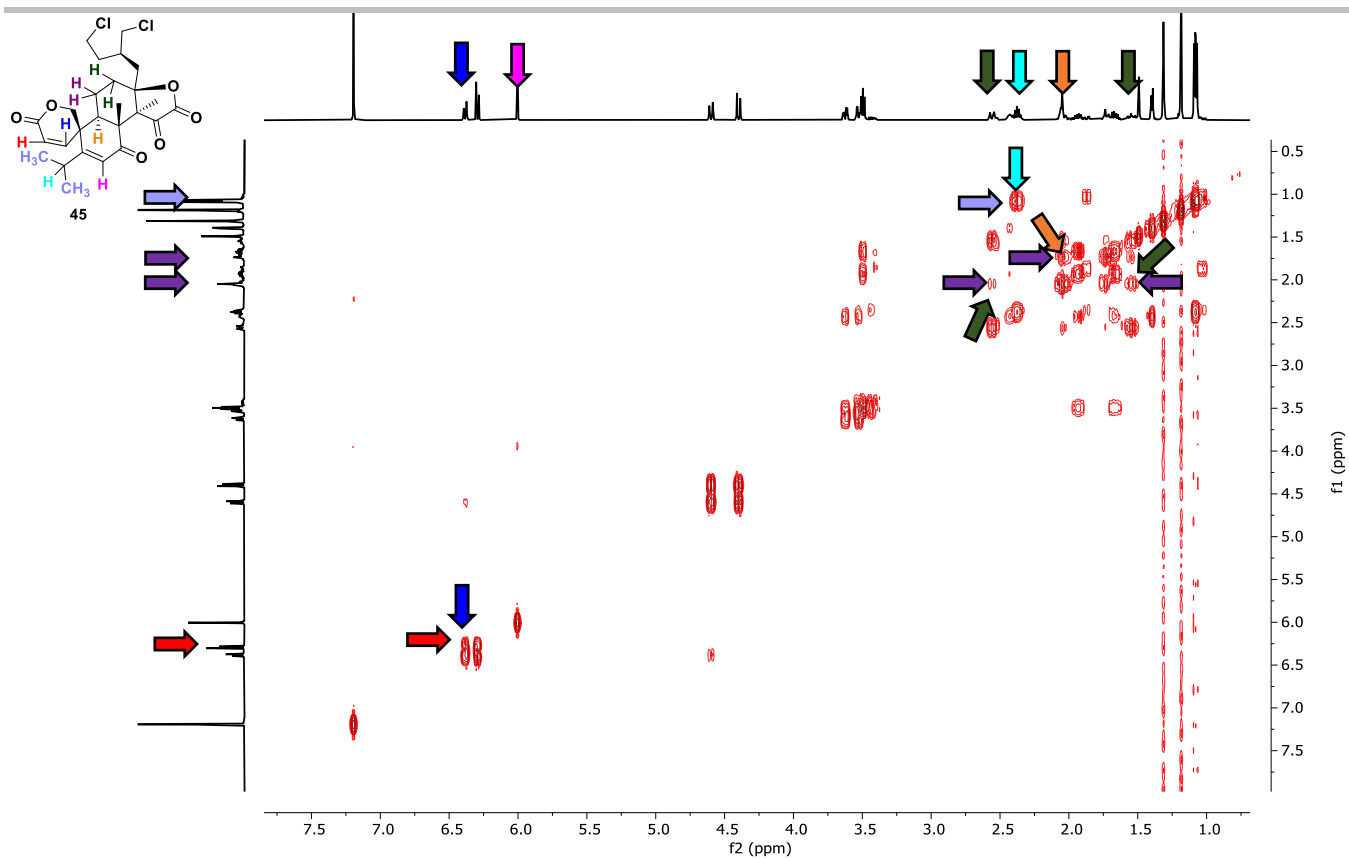 $^1\text{H}$ - $^1\text{H}$  COSY NMR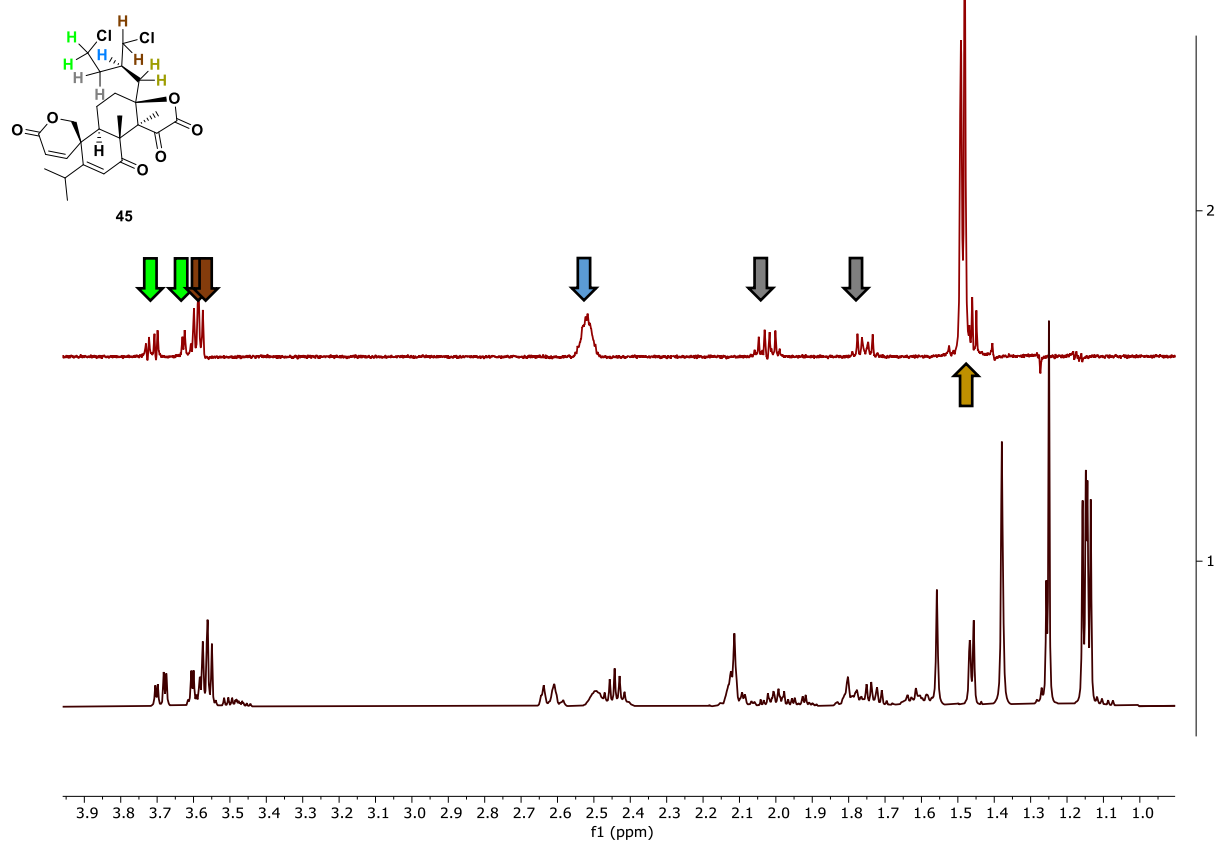 $^1\text{H}$ - $^1\text{H}$  1D TOCSY NMR

## SUPPORTING INFORMATION

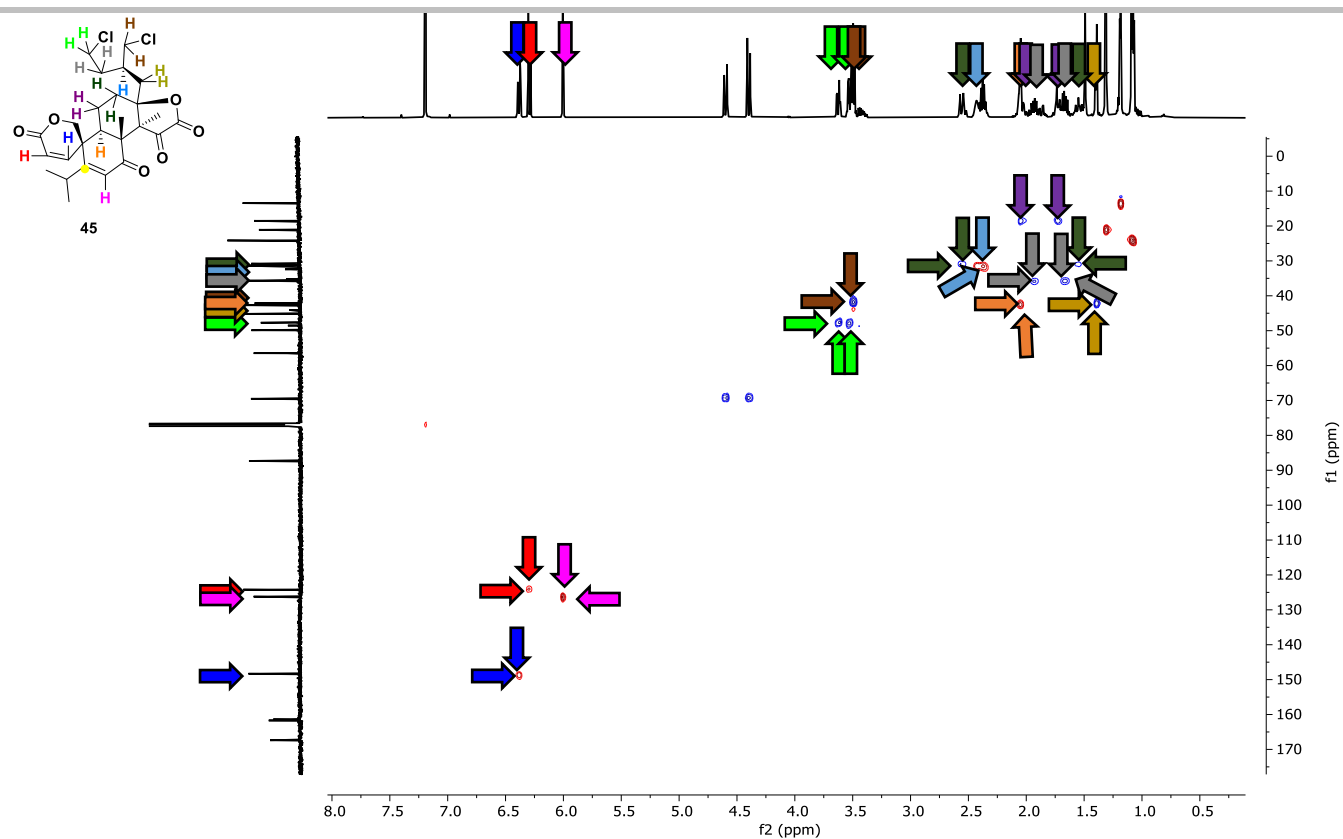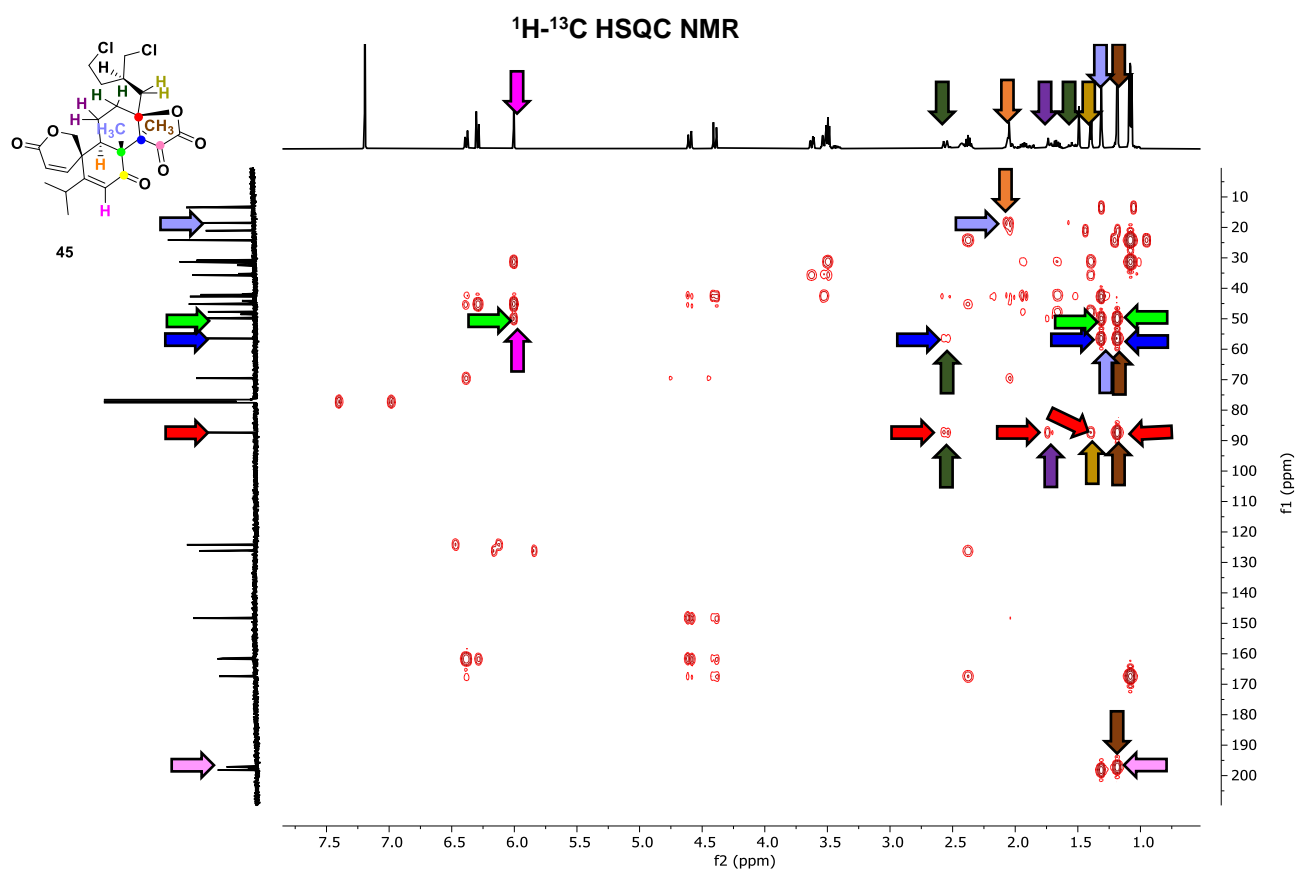

## SUPPORTING INFORMATION

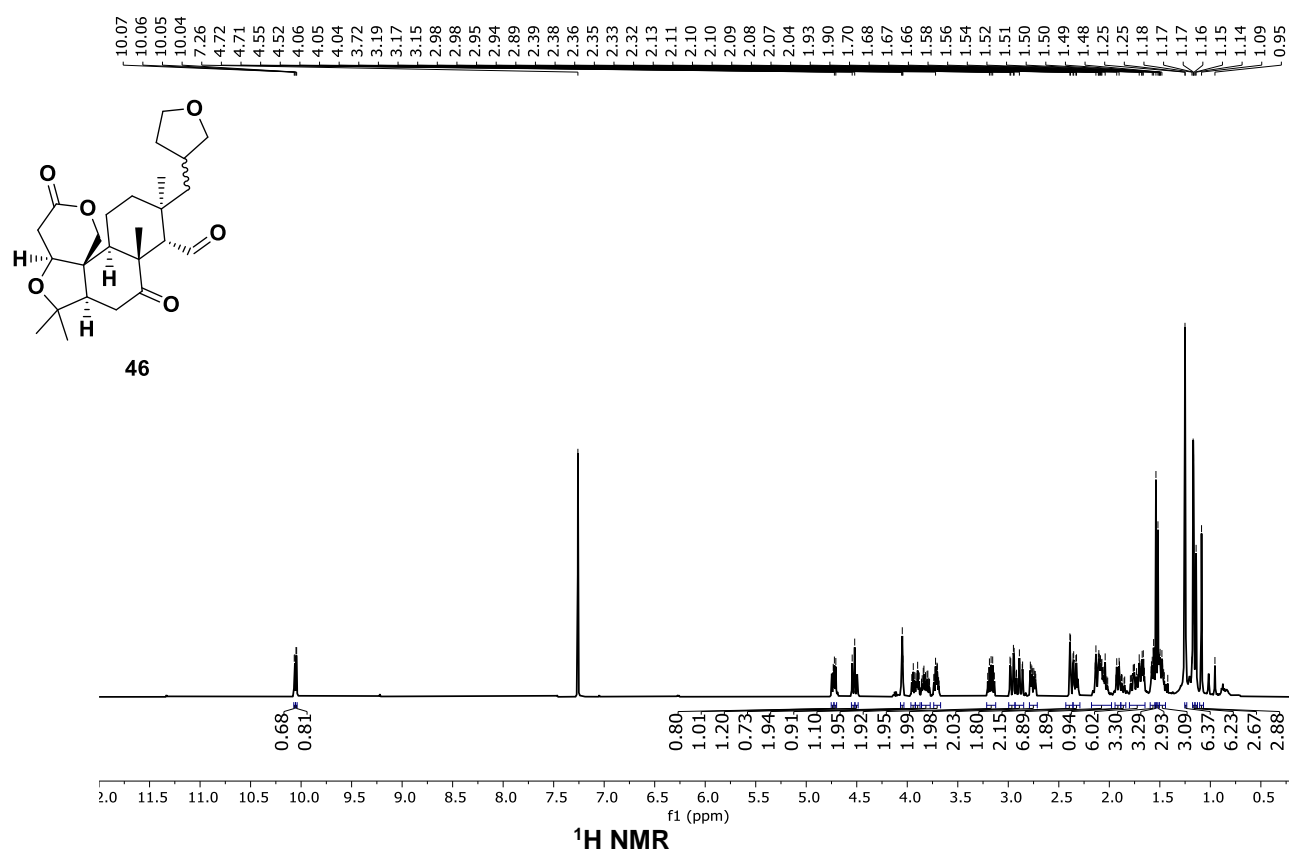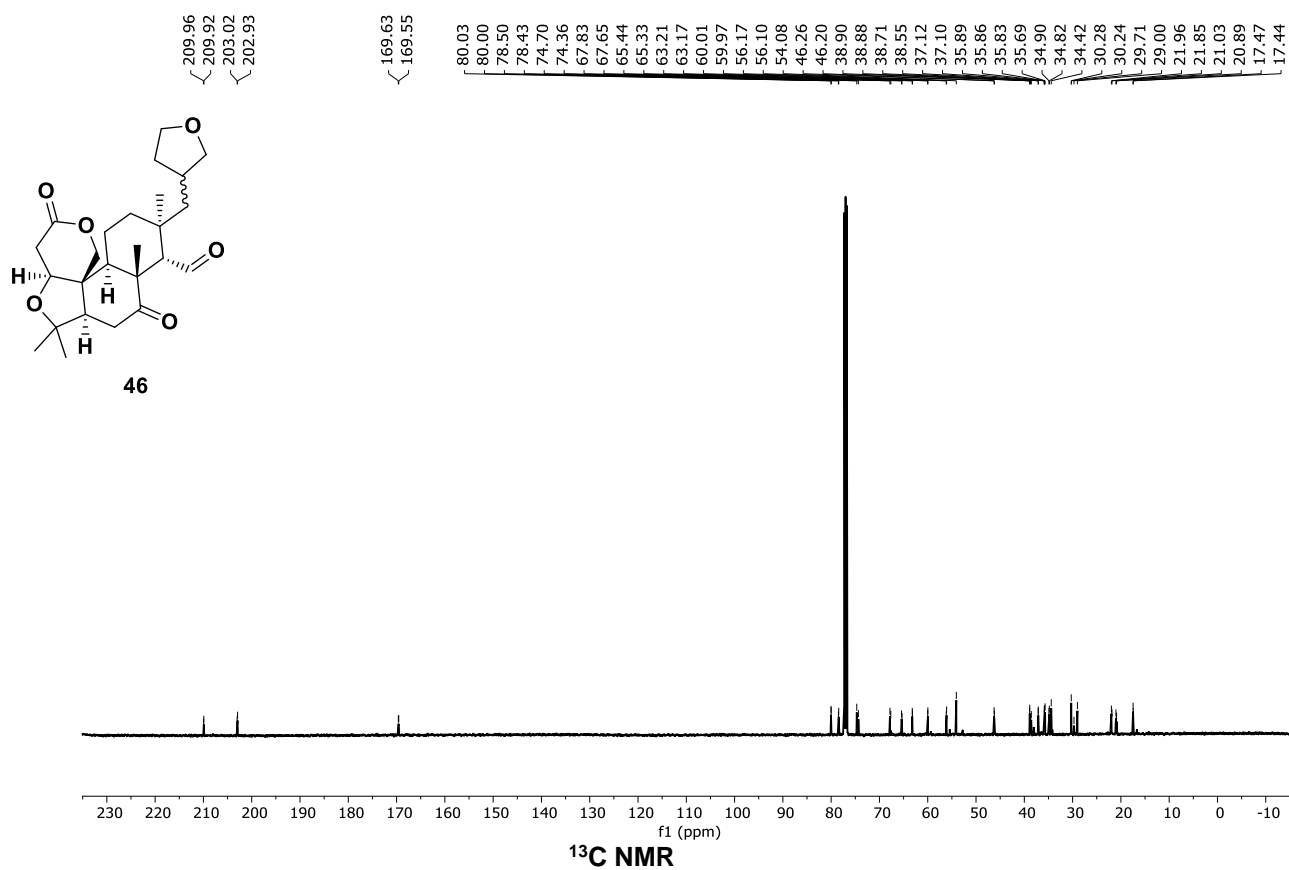

## SUPPORTING INFORMATION

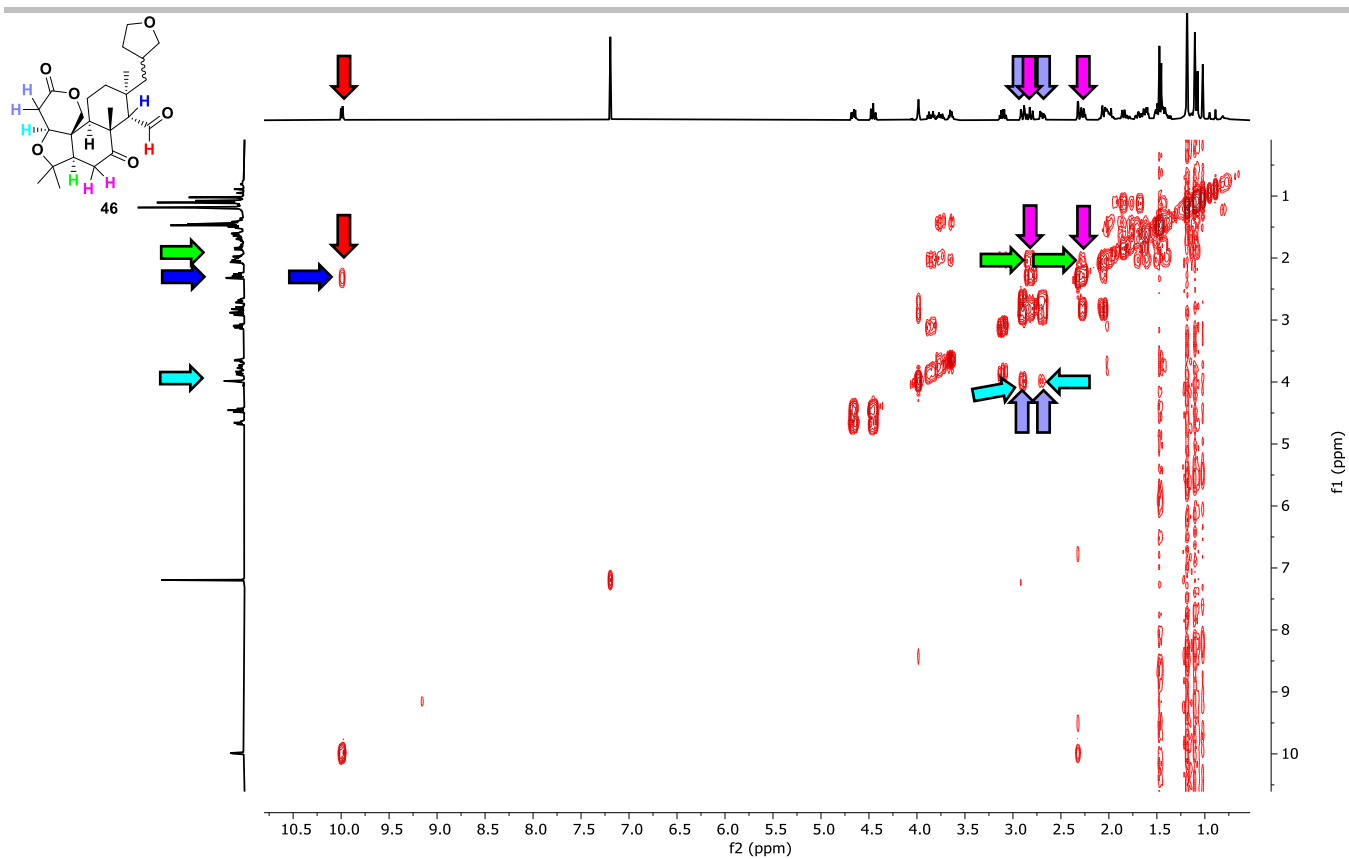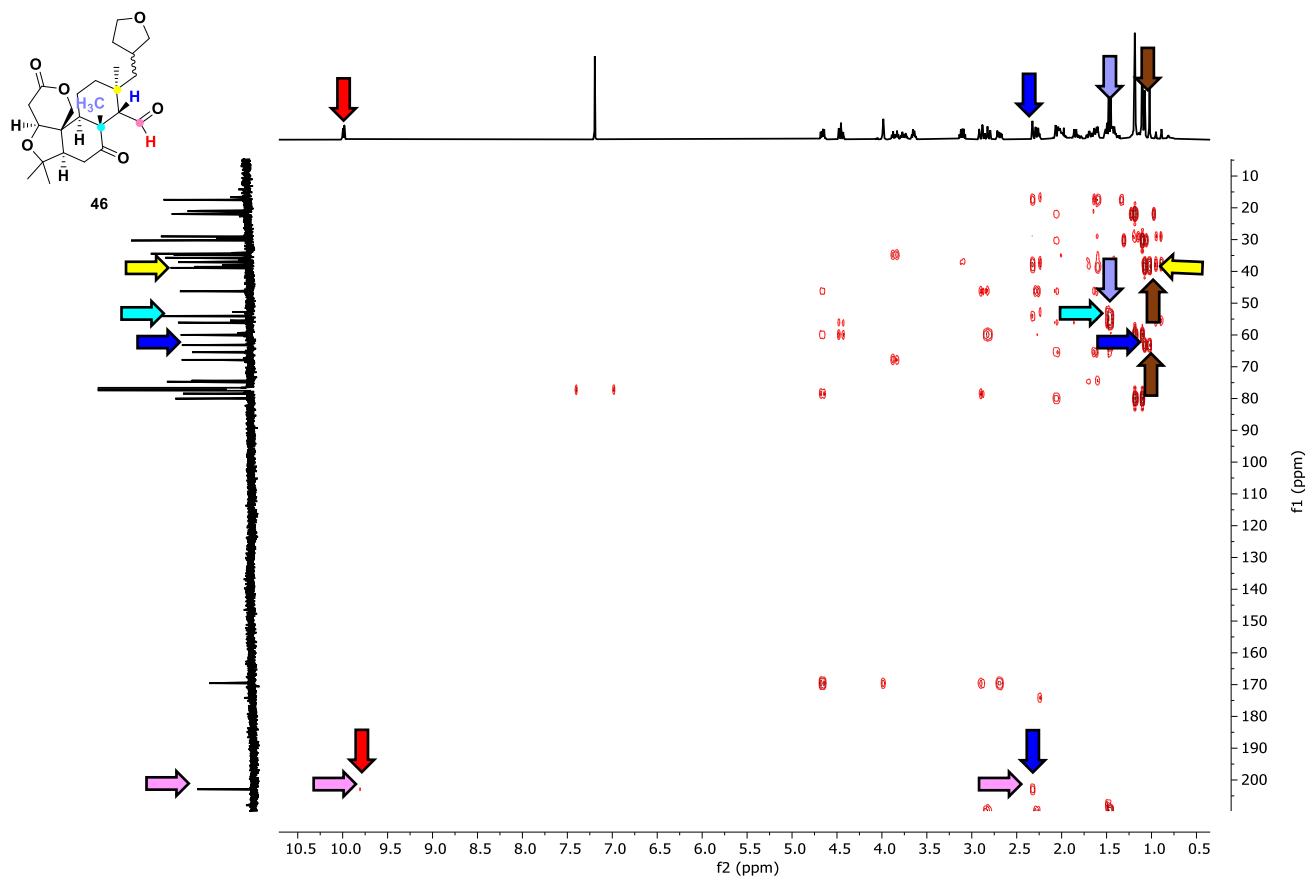**<sup>1</sup>H-<sup>13</sup>C HMBC NMR**



## SUPPORTING INFORMATION

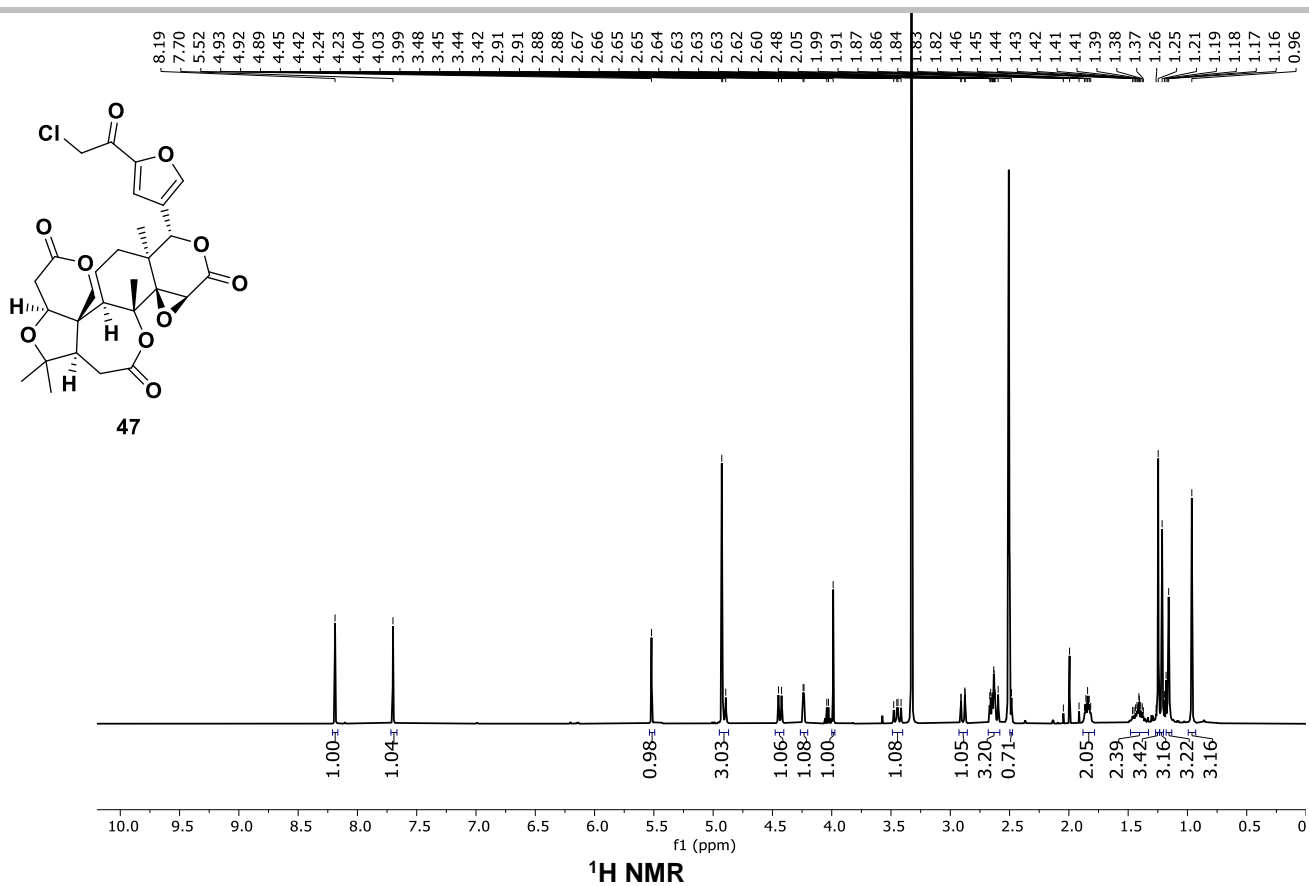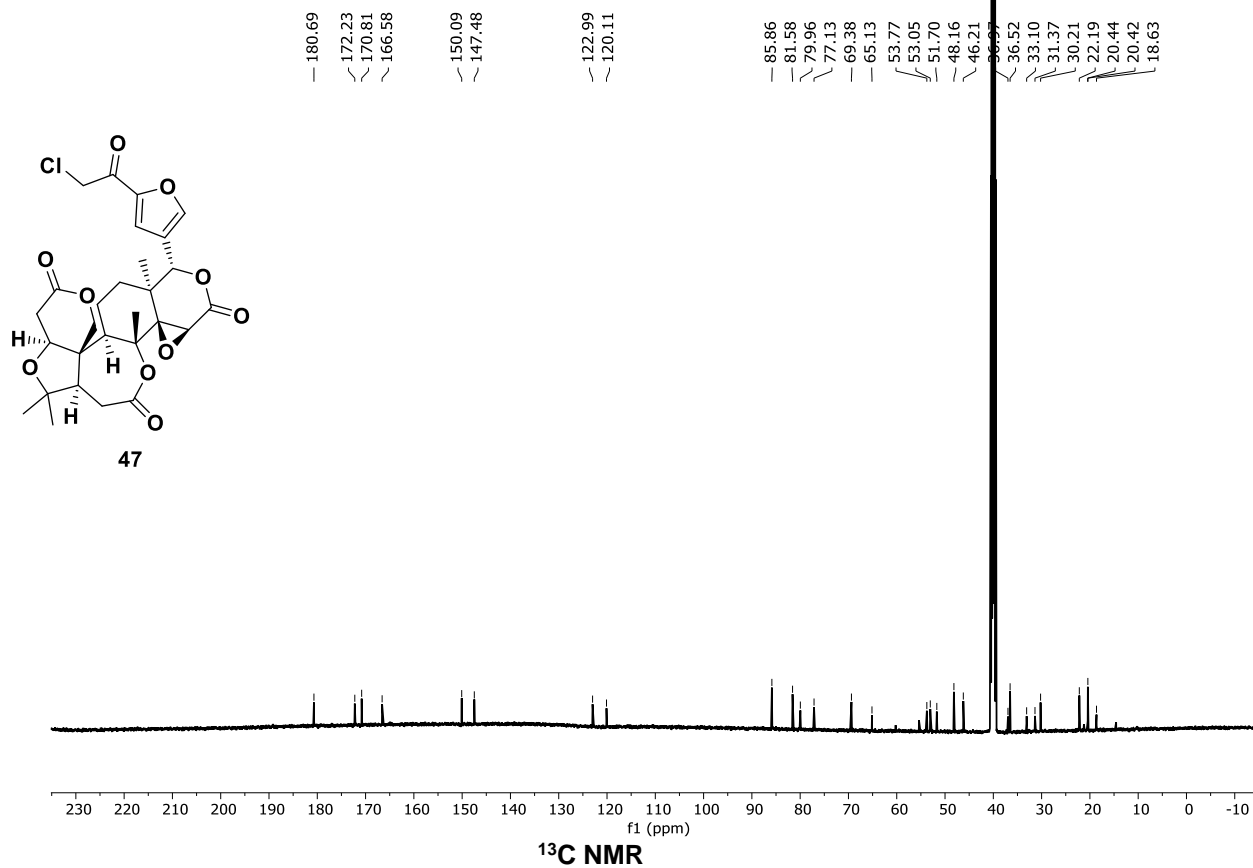

## SUPPORTING INFORMATION

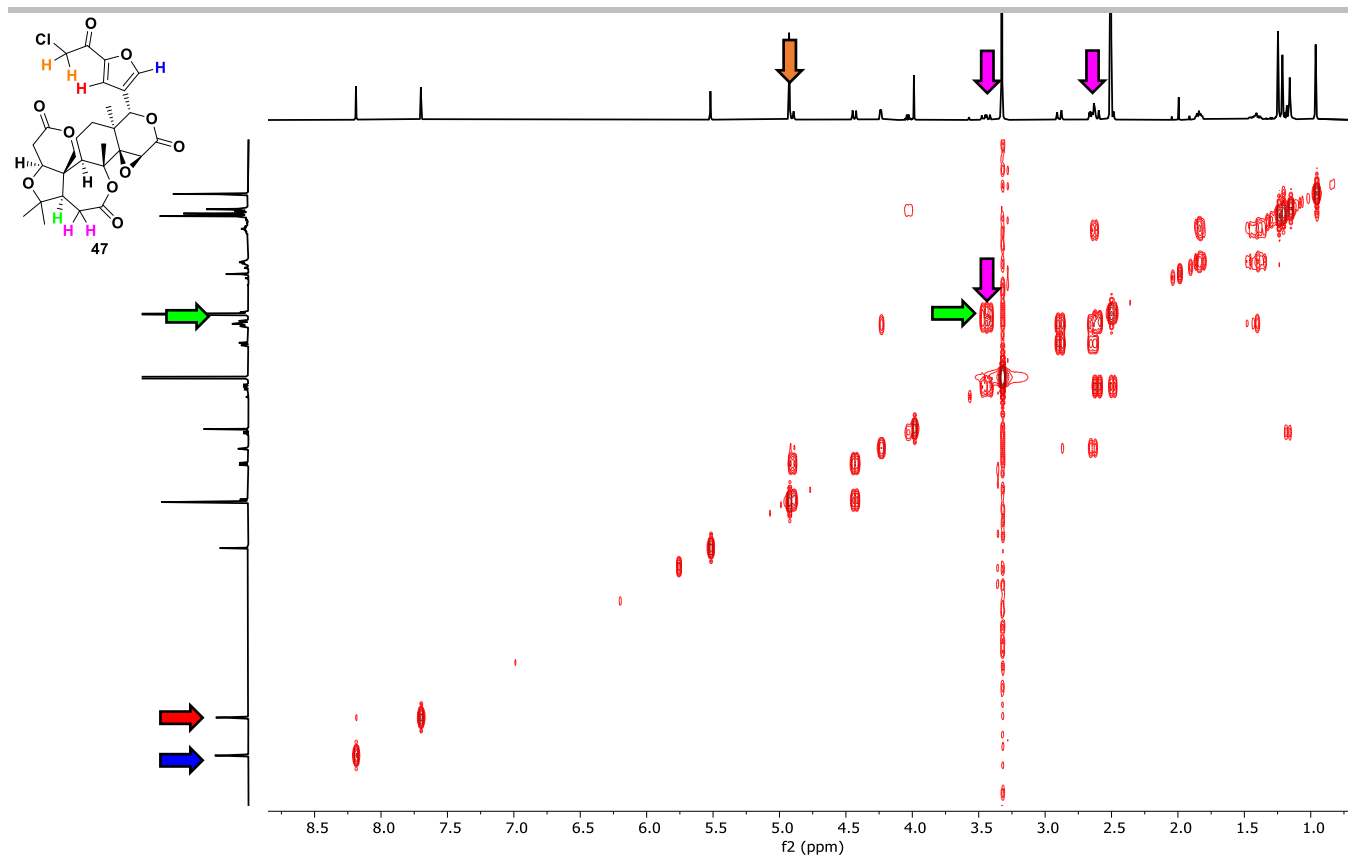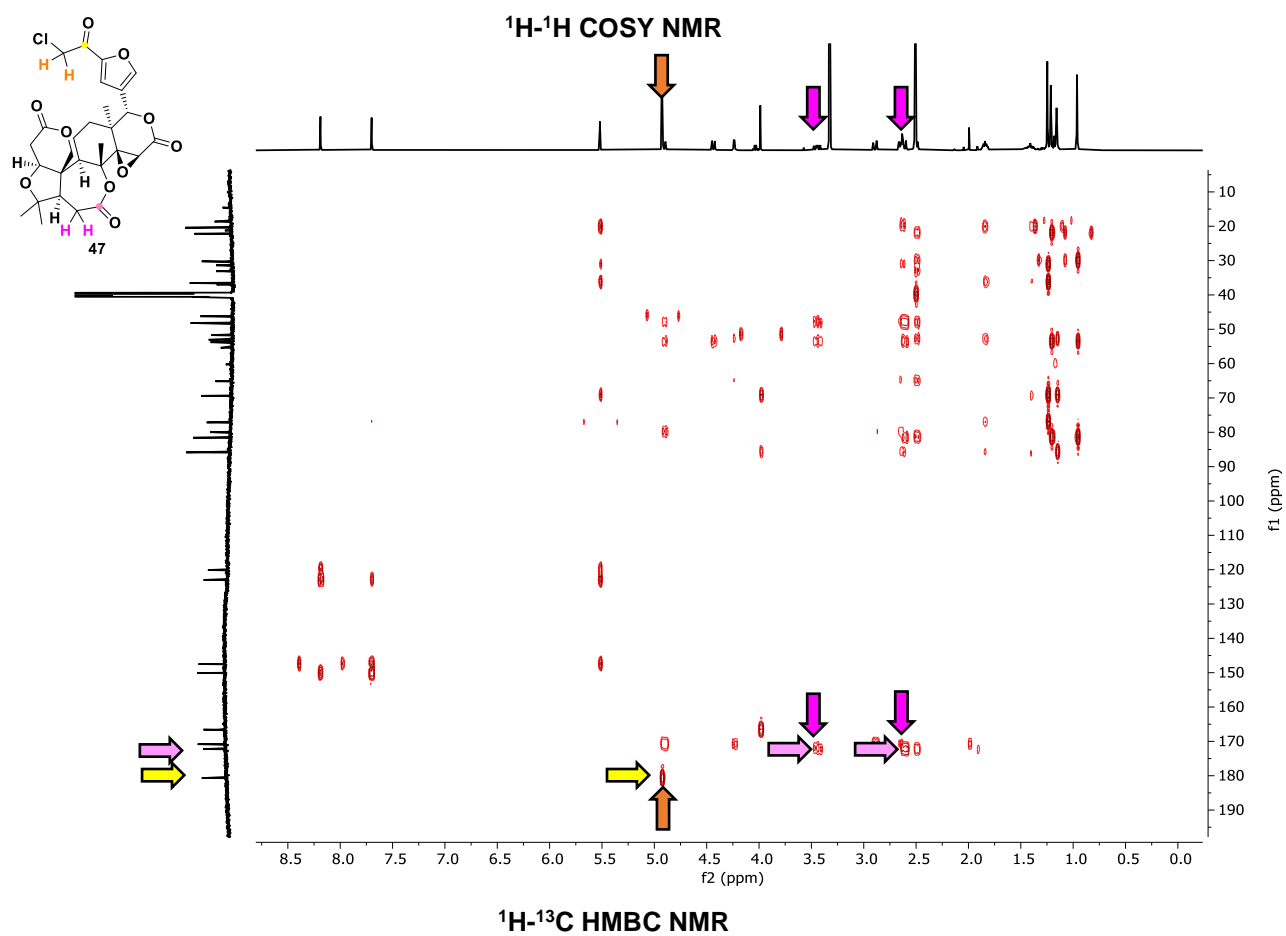

## SUPPORTING INFORMATION

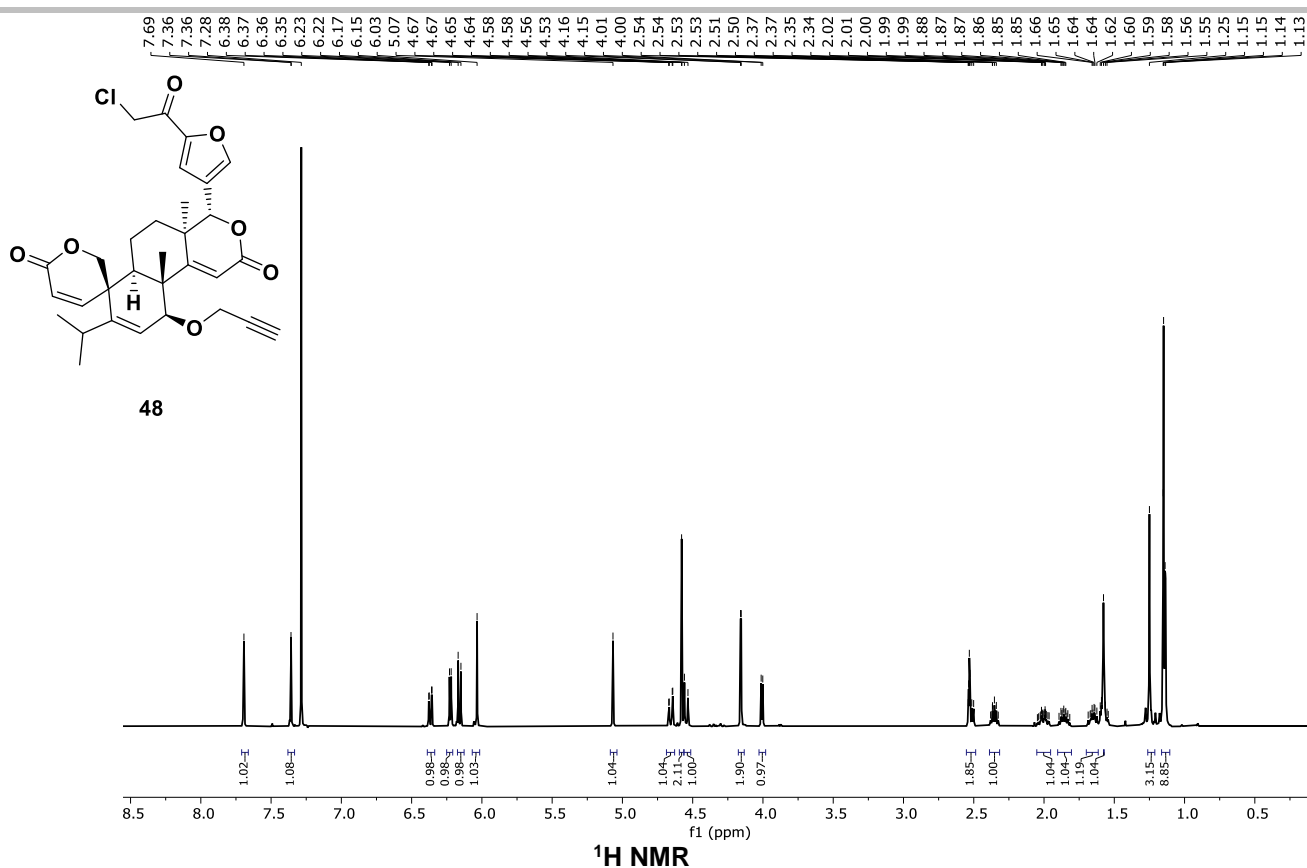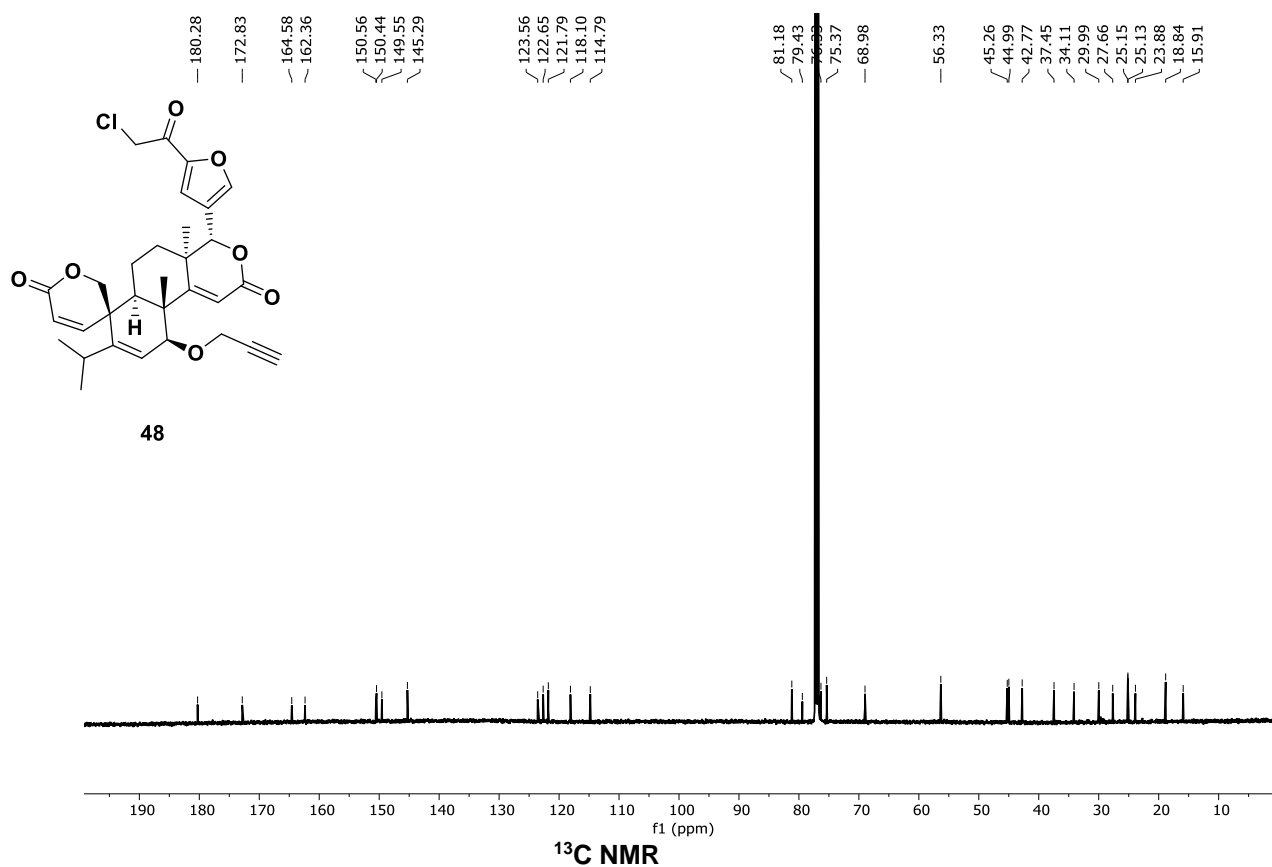

## SUPPORTING INFORMATION

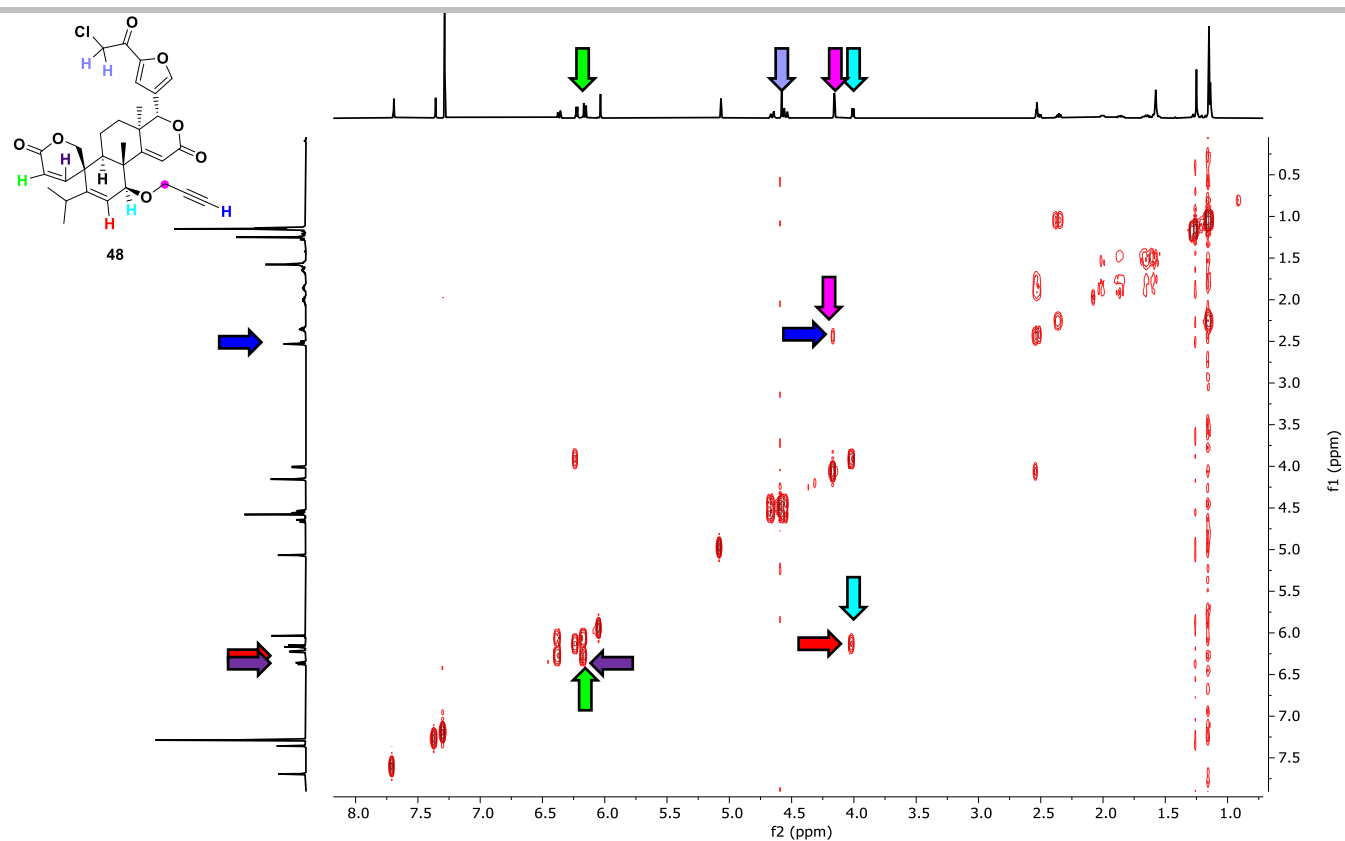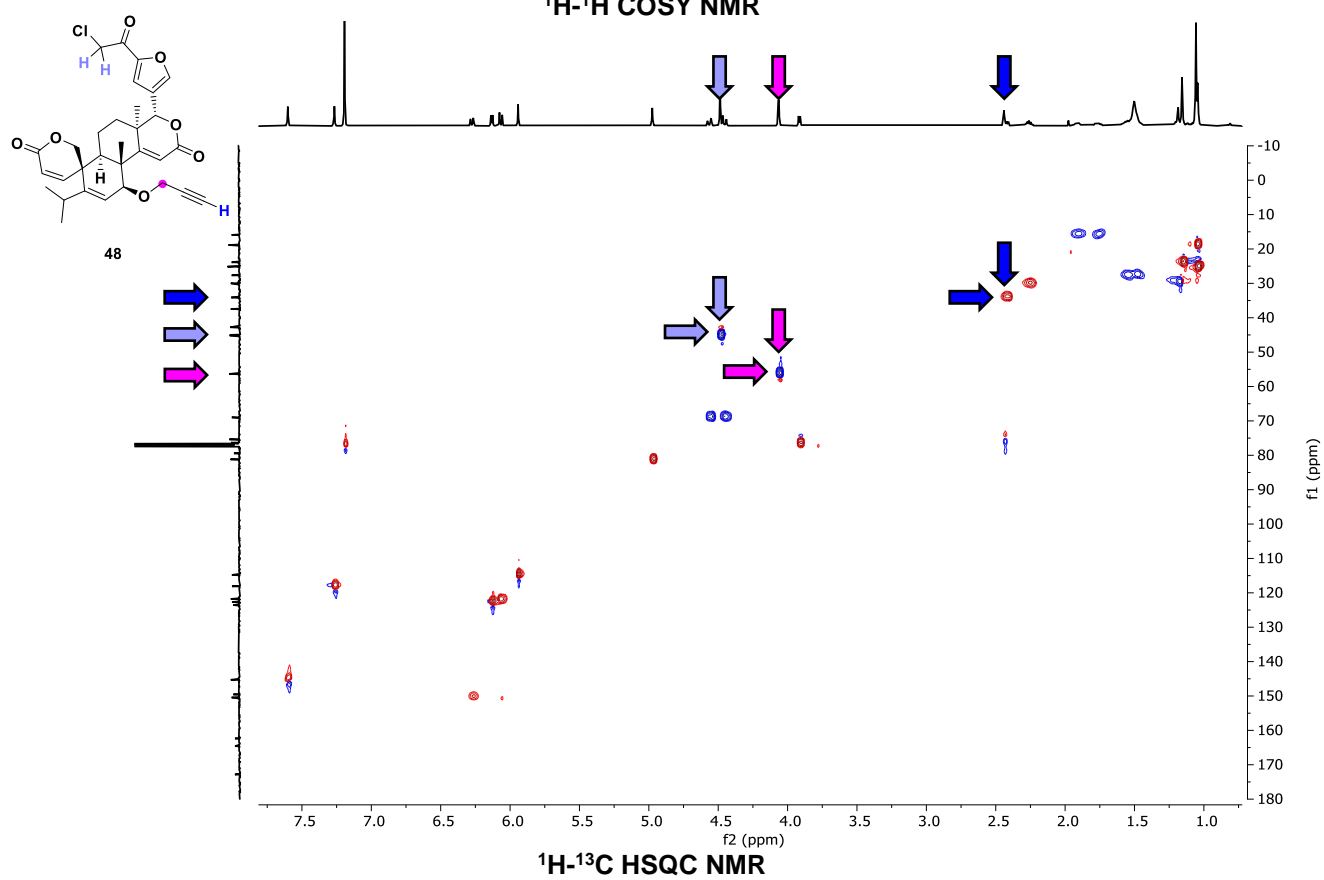

## SUPPORTING INFORMATION

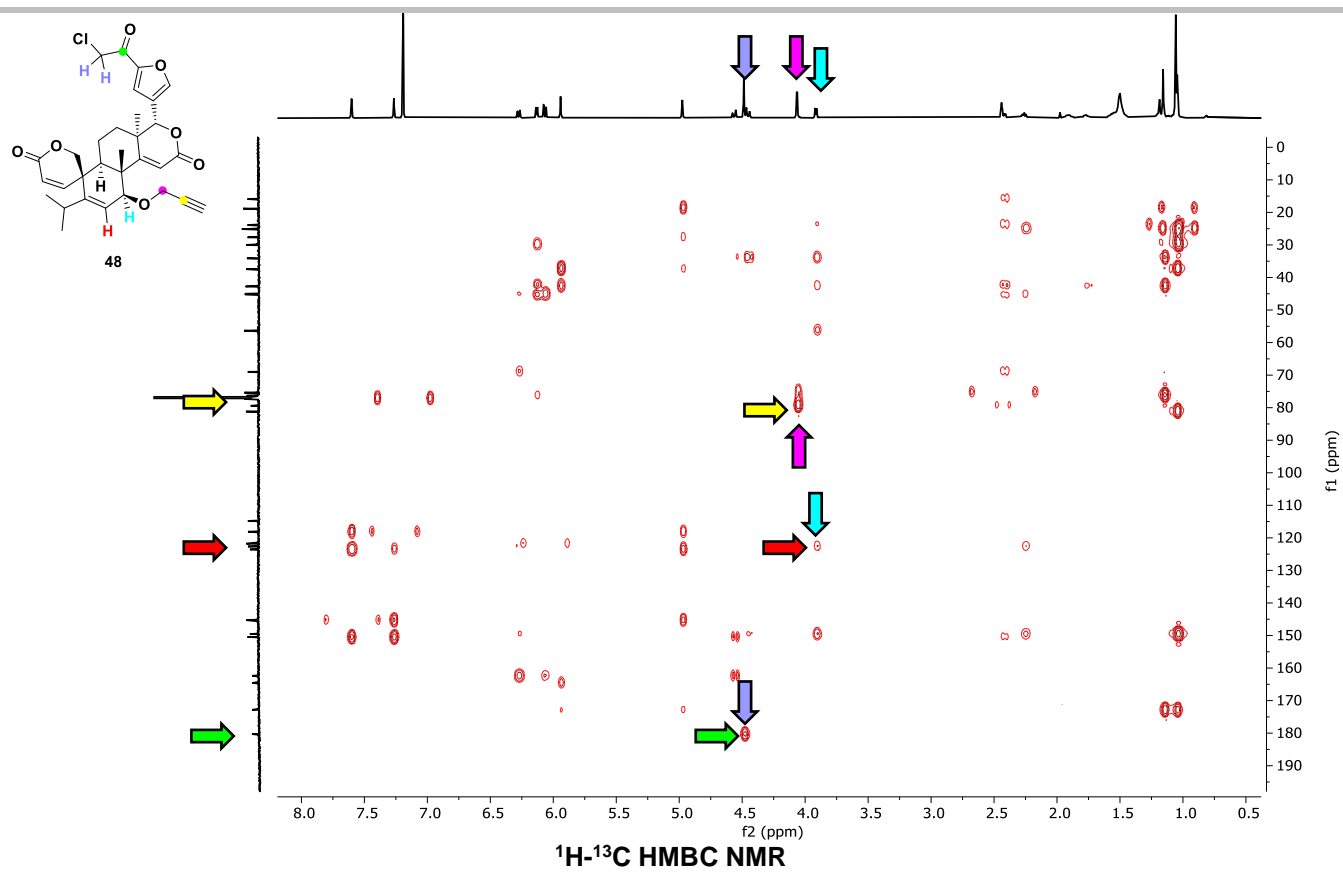

## SUPPORTING INFORMATION

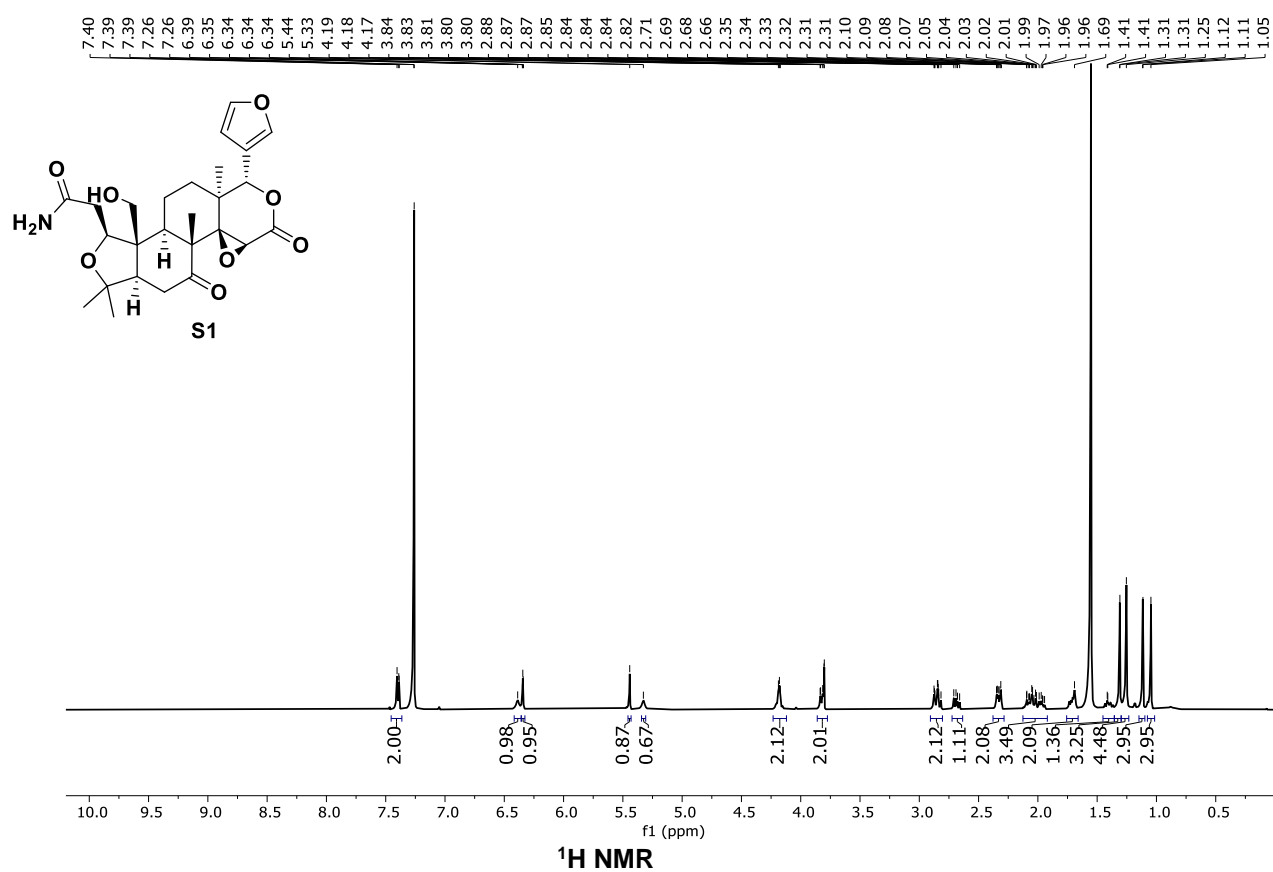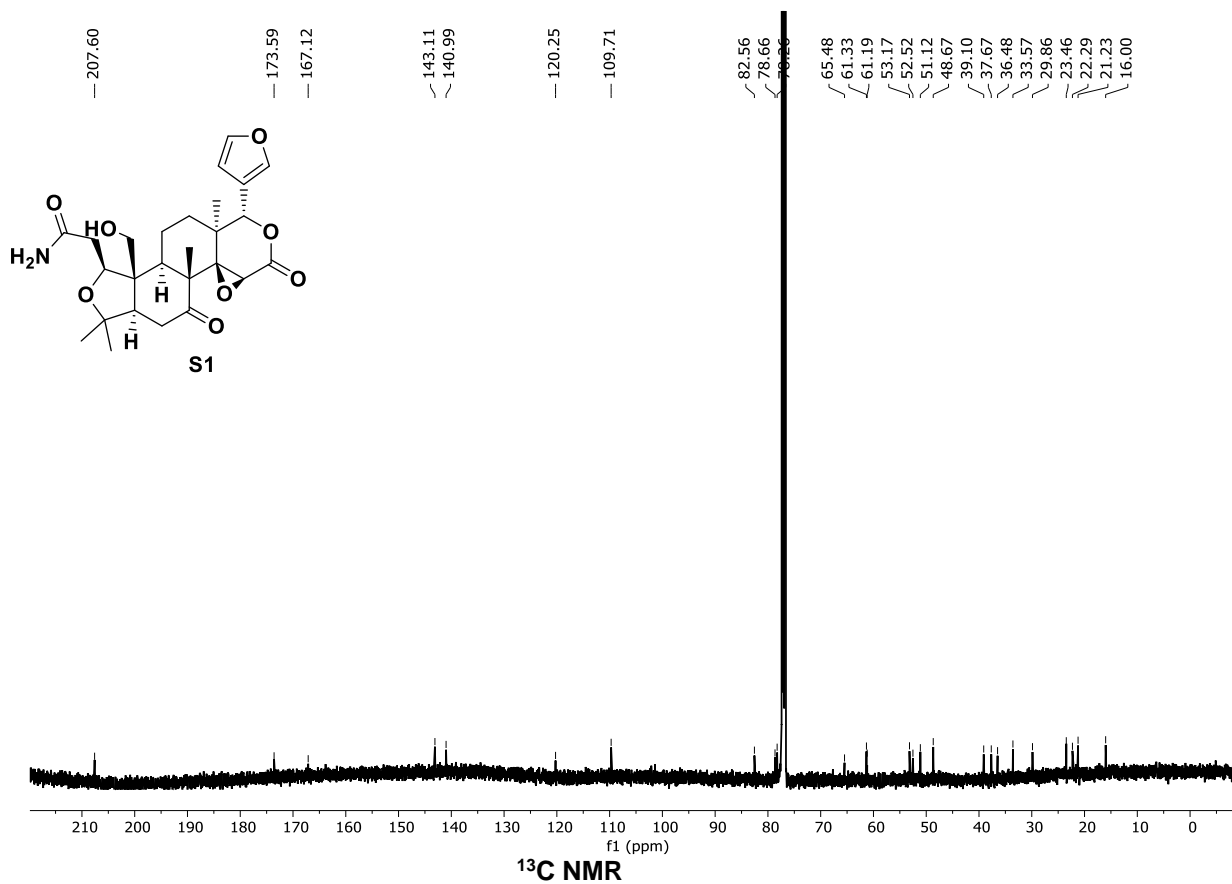

## SUPPORTING INFORMATION

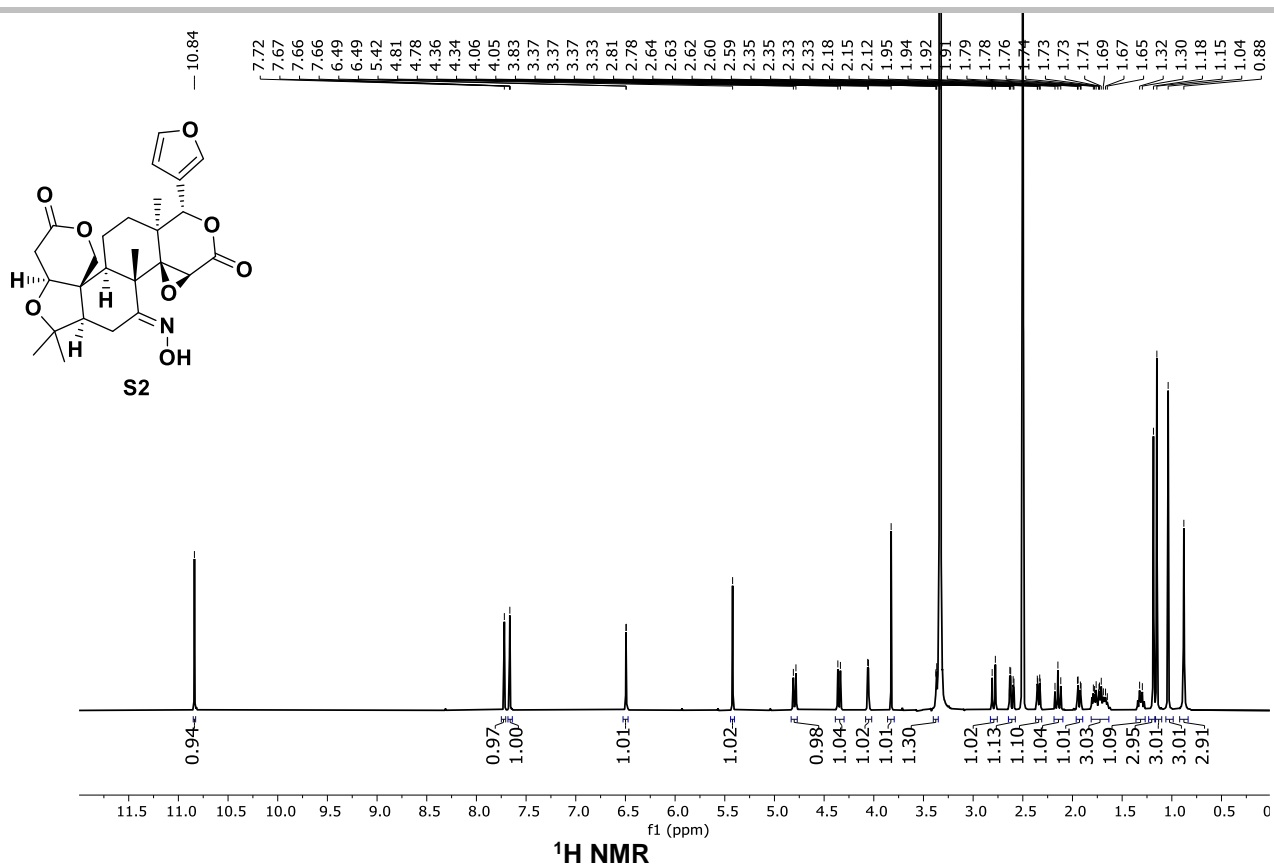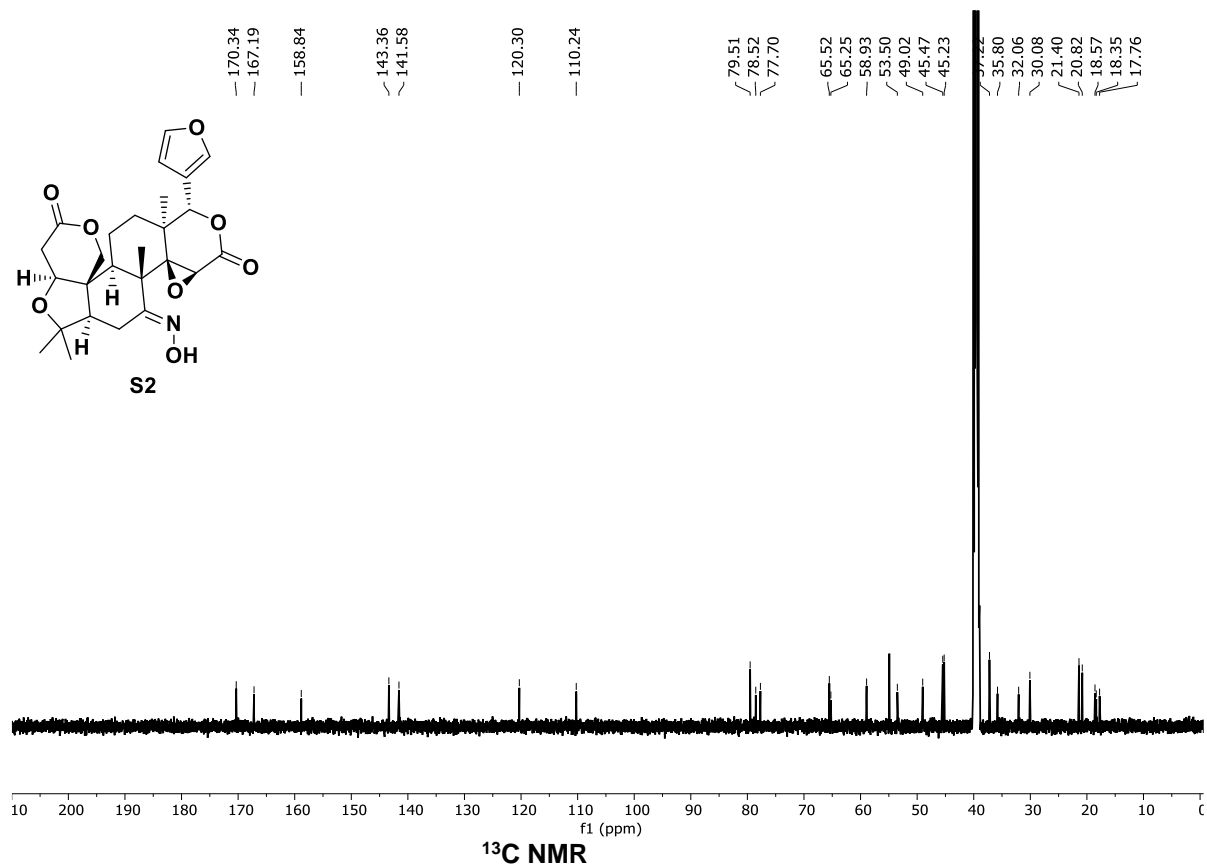

## SUPPORTING INFORMATION

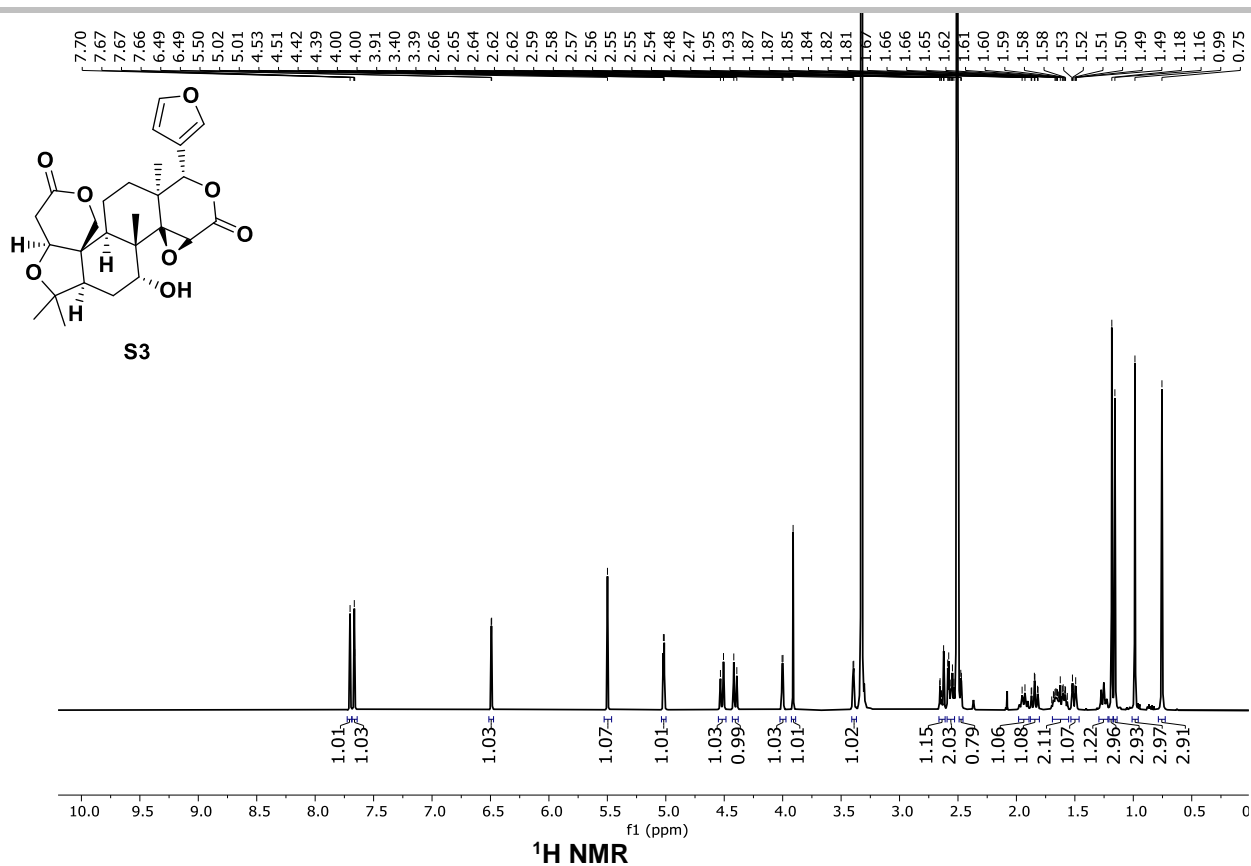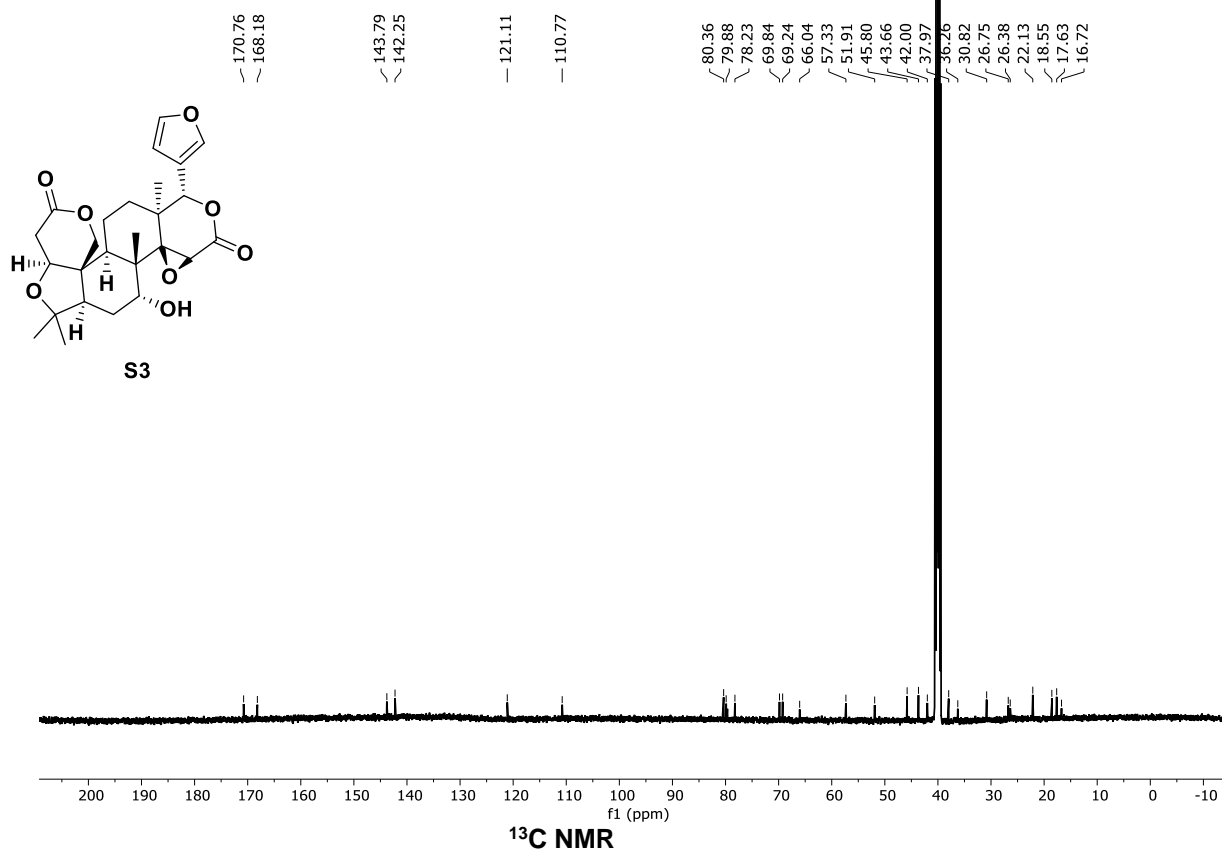



## SUPPORTING INFORMATION

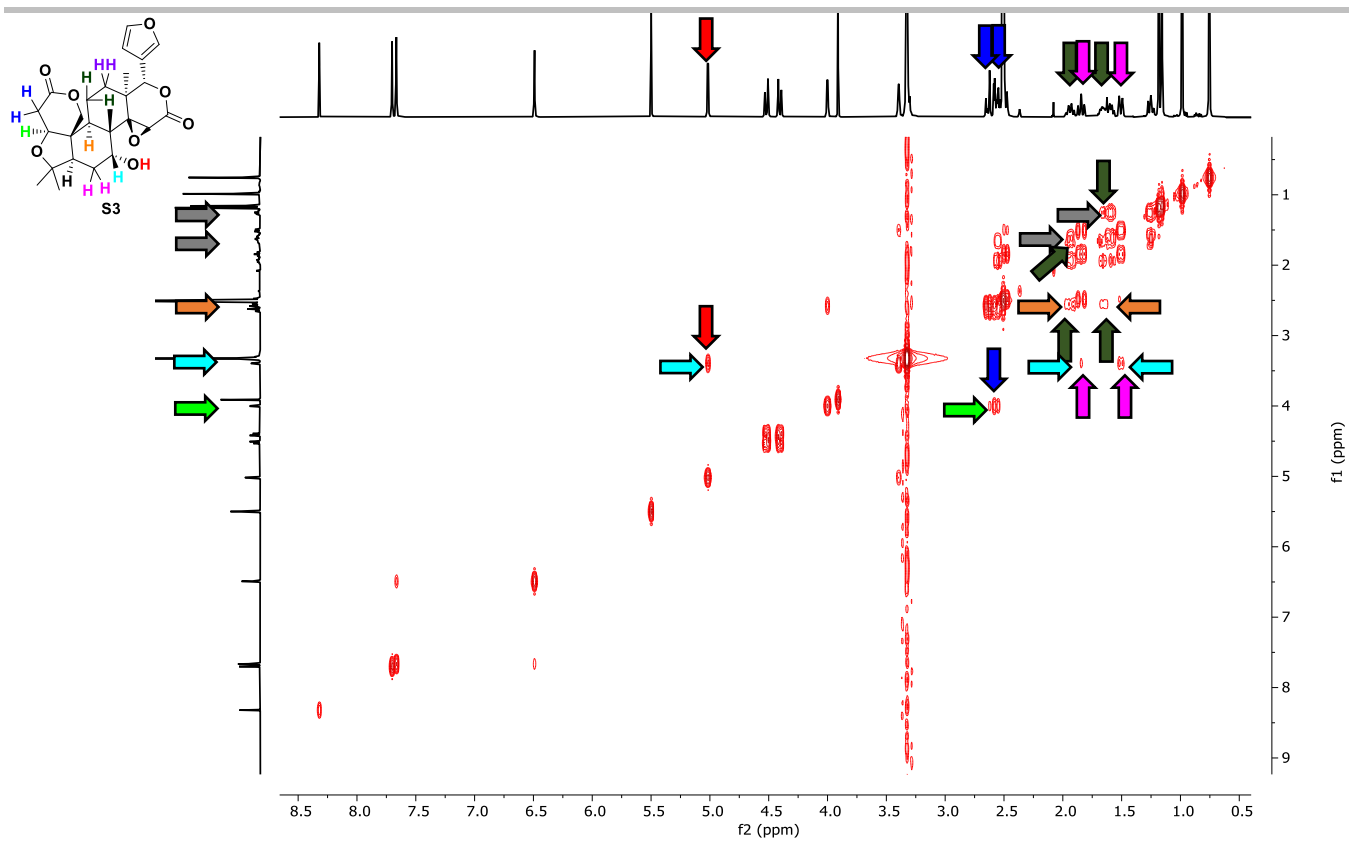



## SUPPORTING INFORMATION

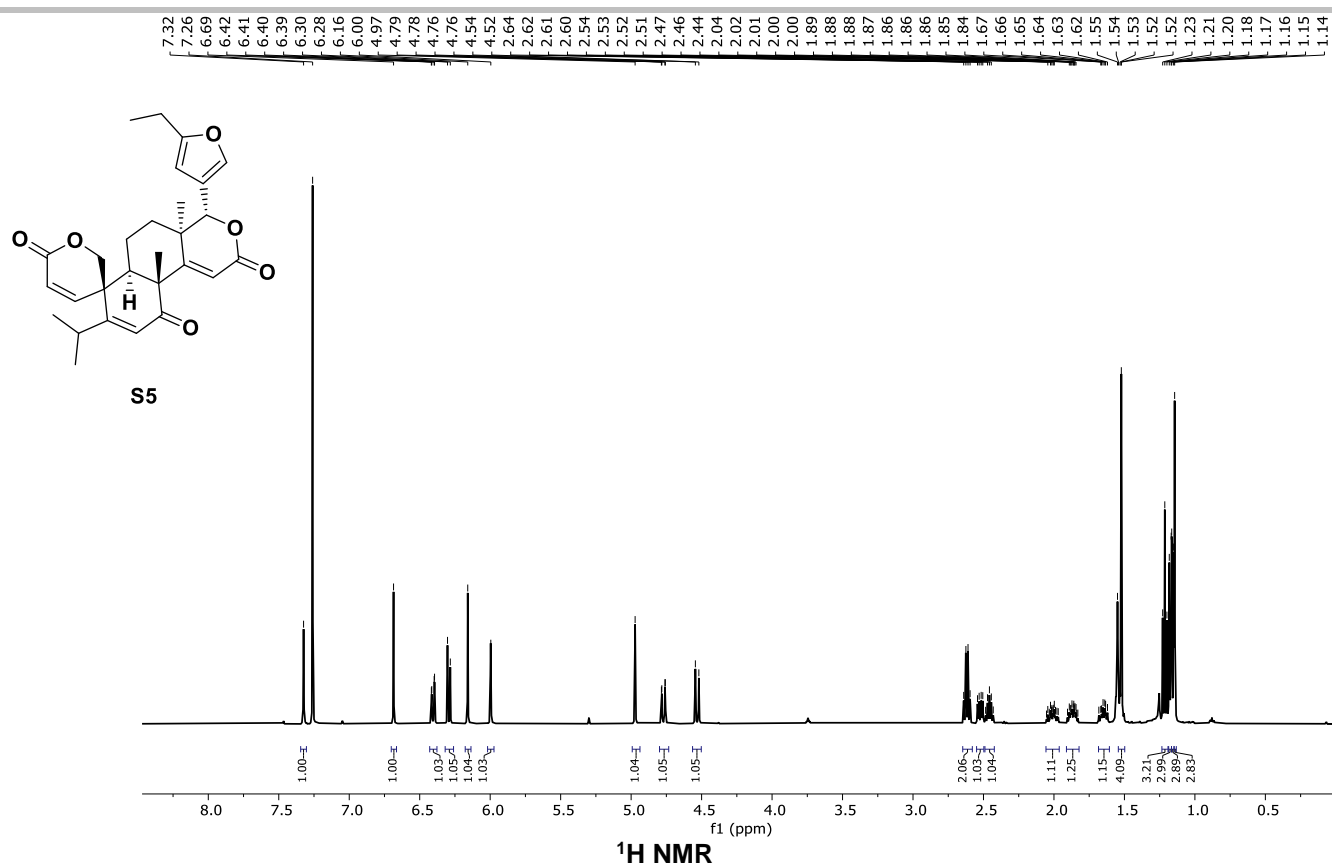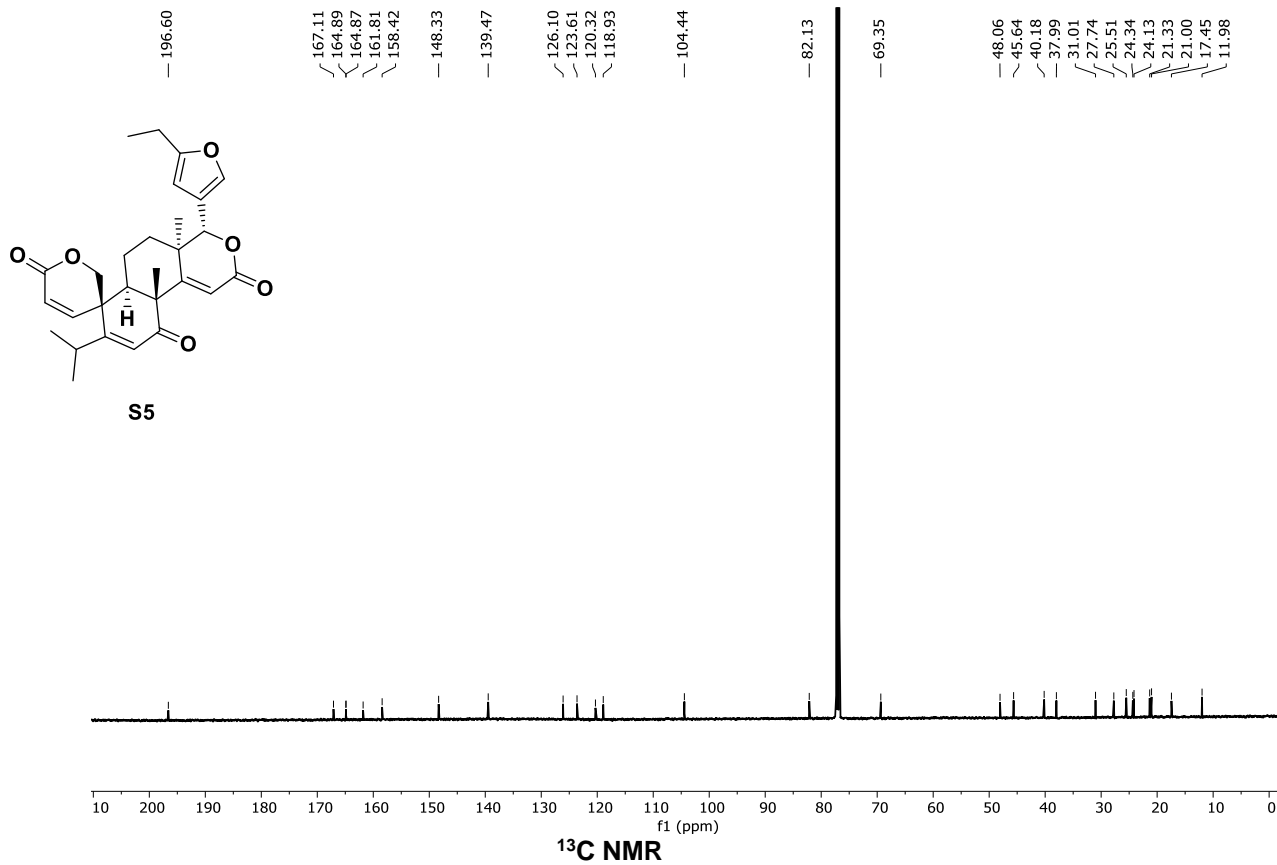

## SUPPORTING INFORMATION

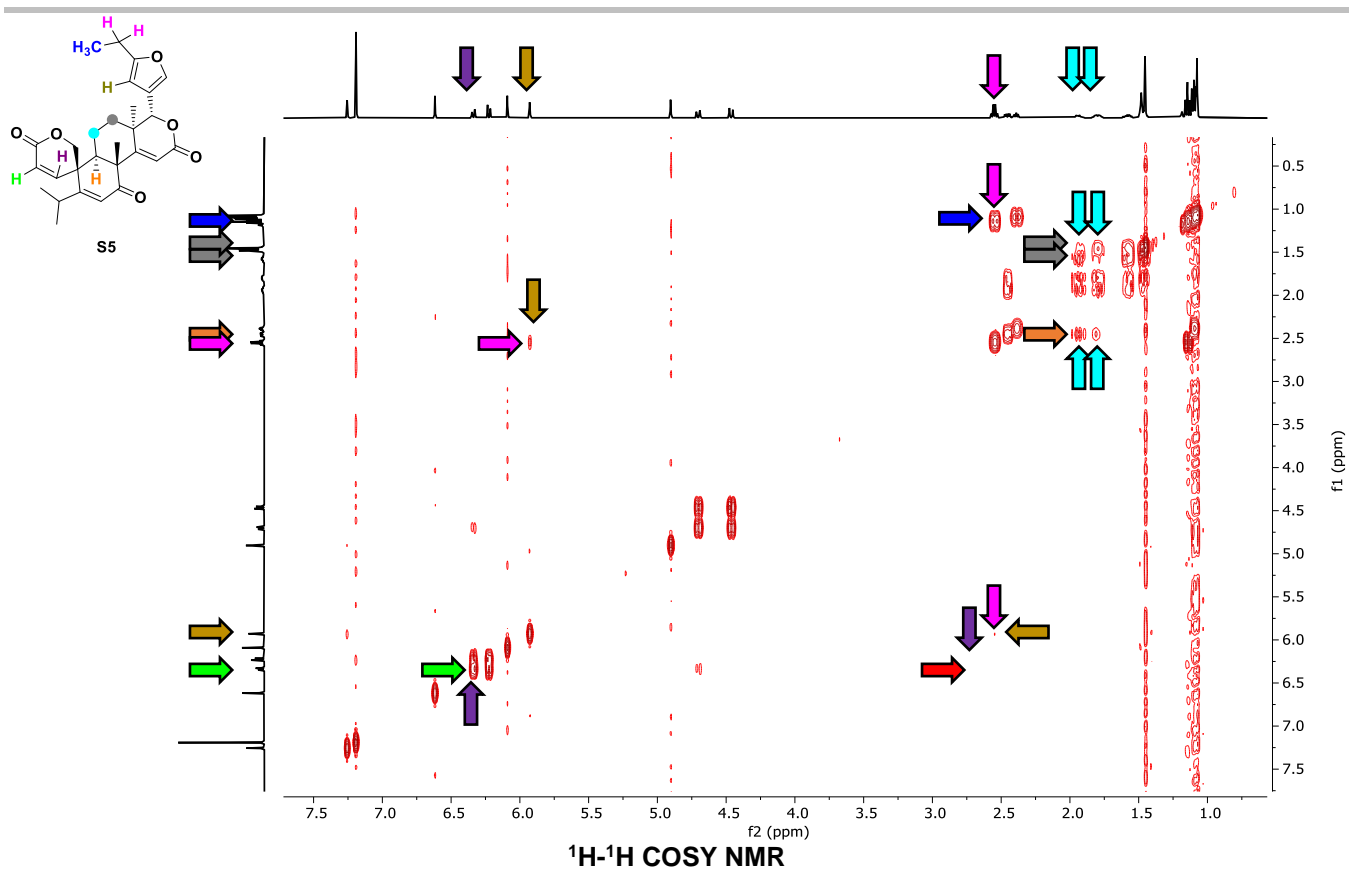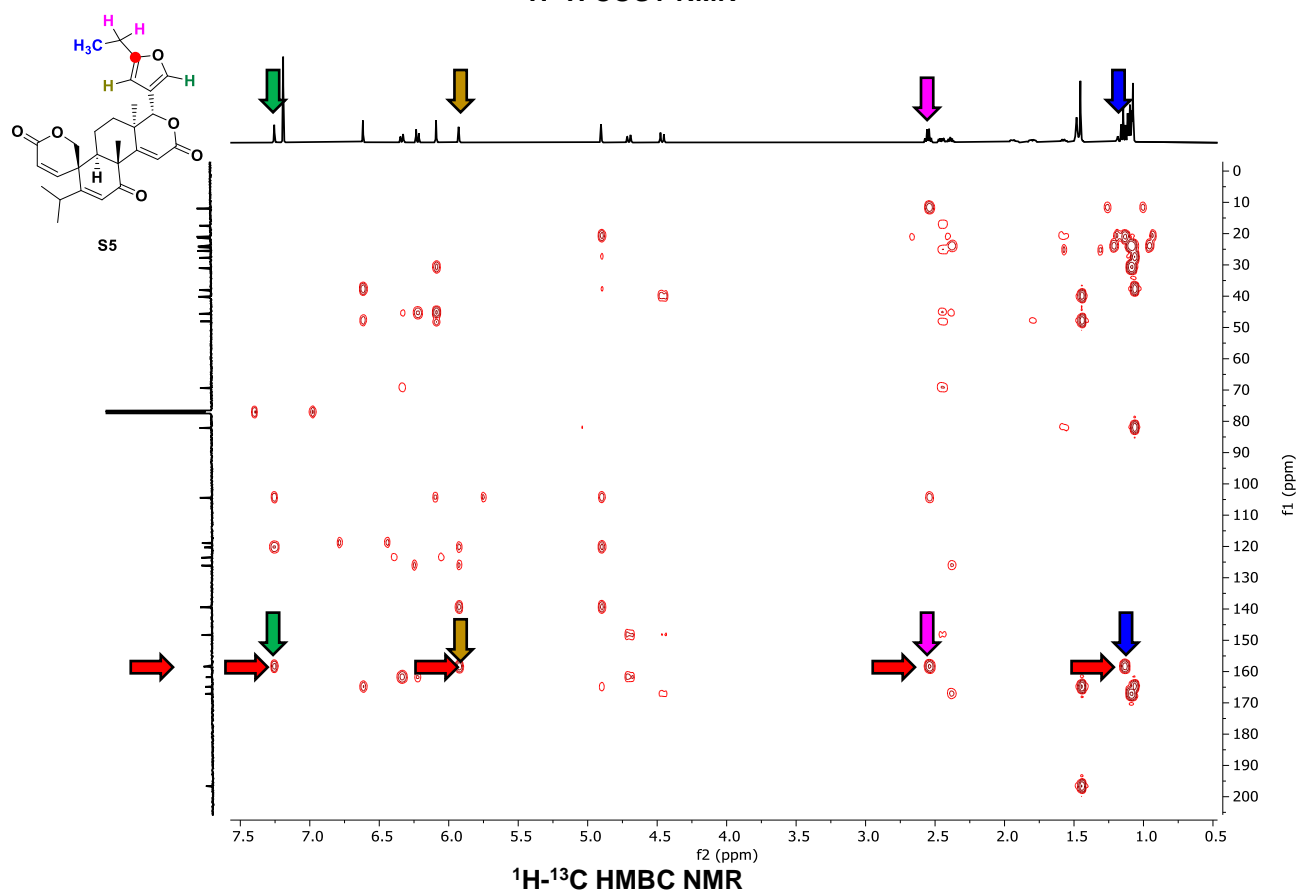

## SUPPORTING INFORMATION

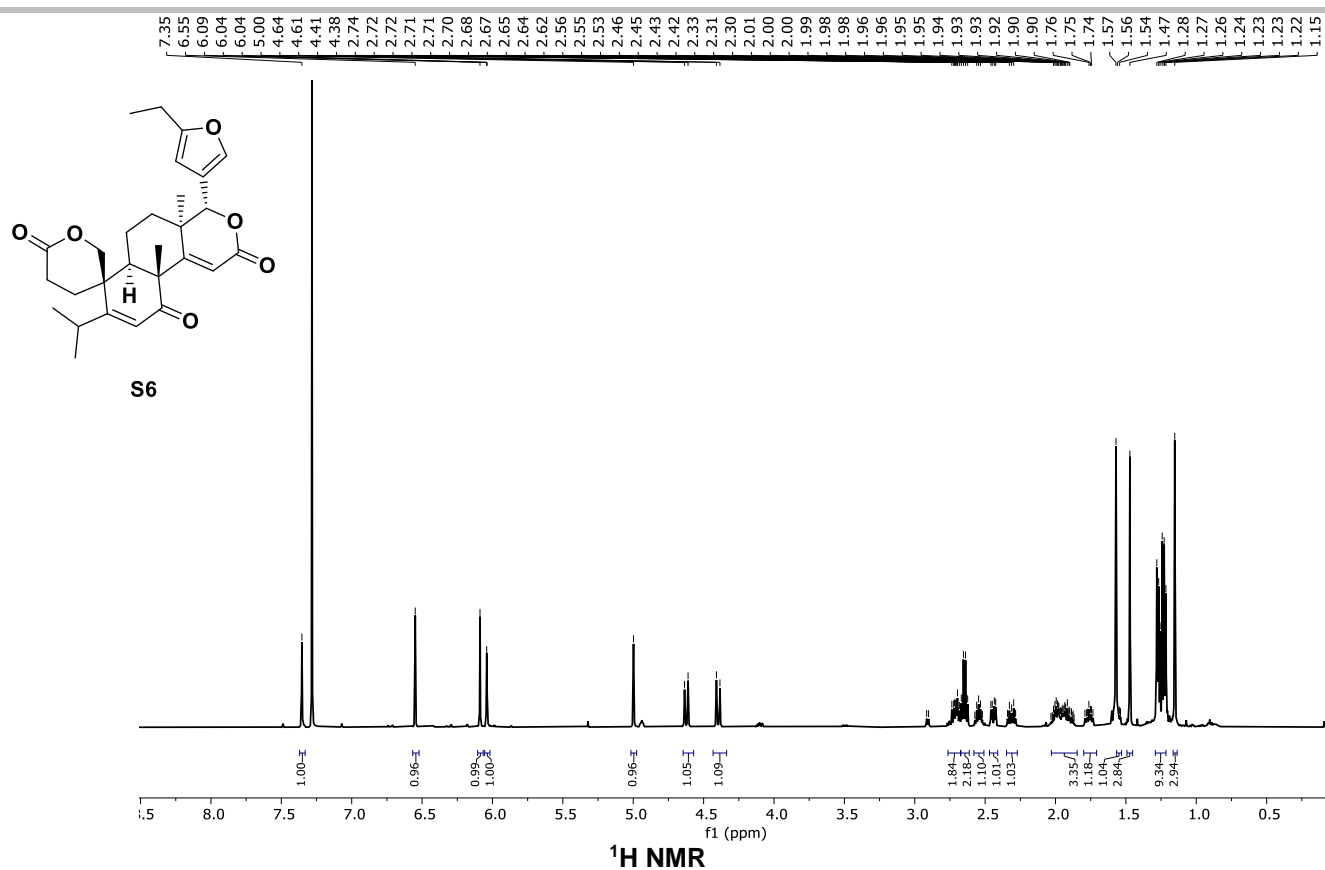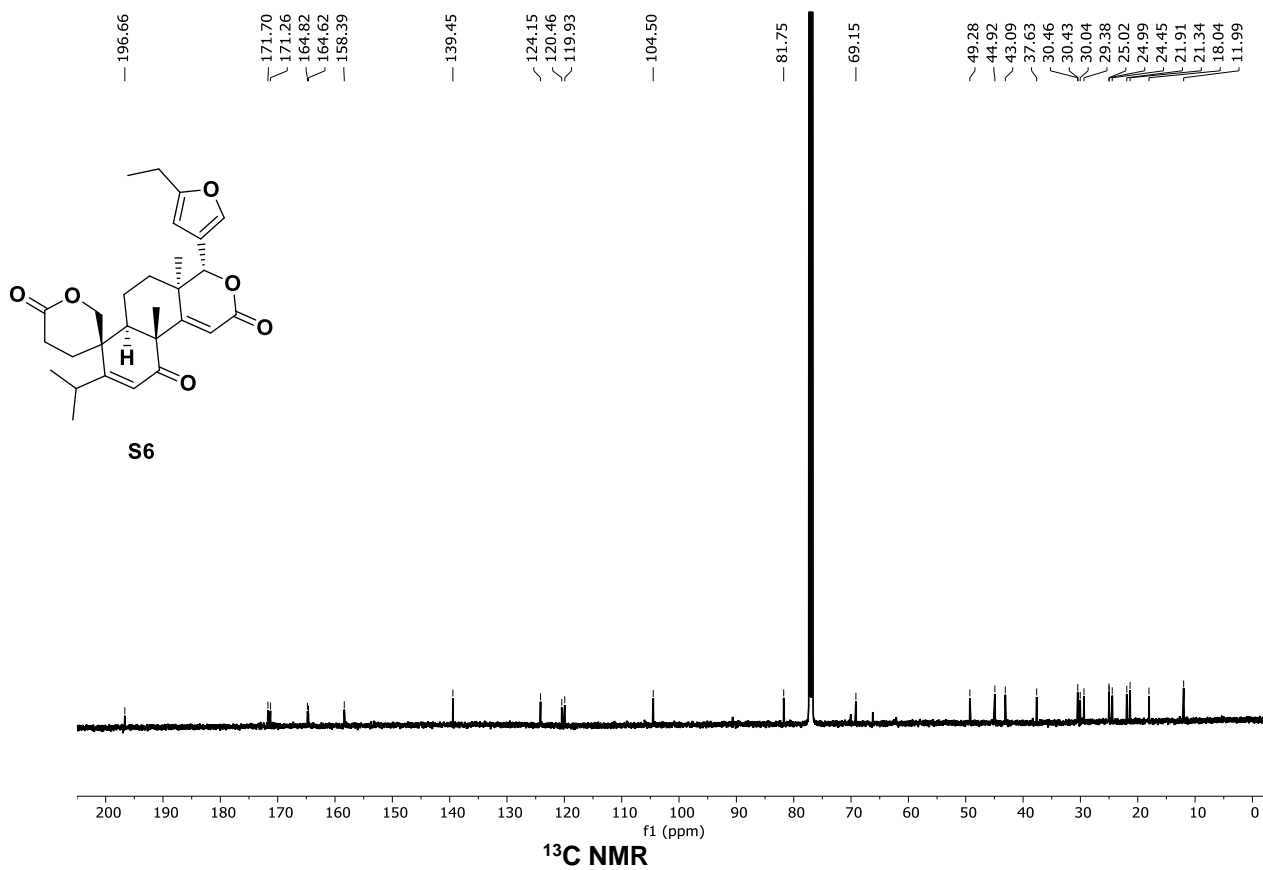

## SUPPORTING INFORMATION

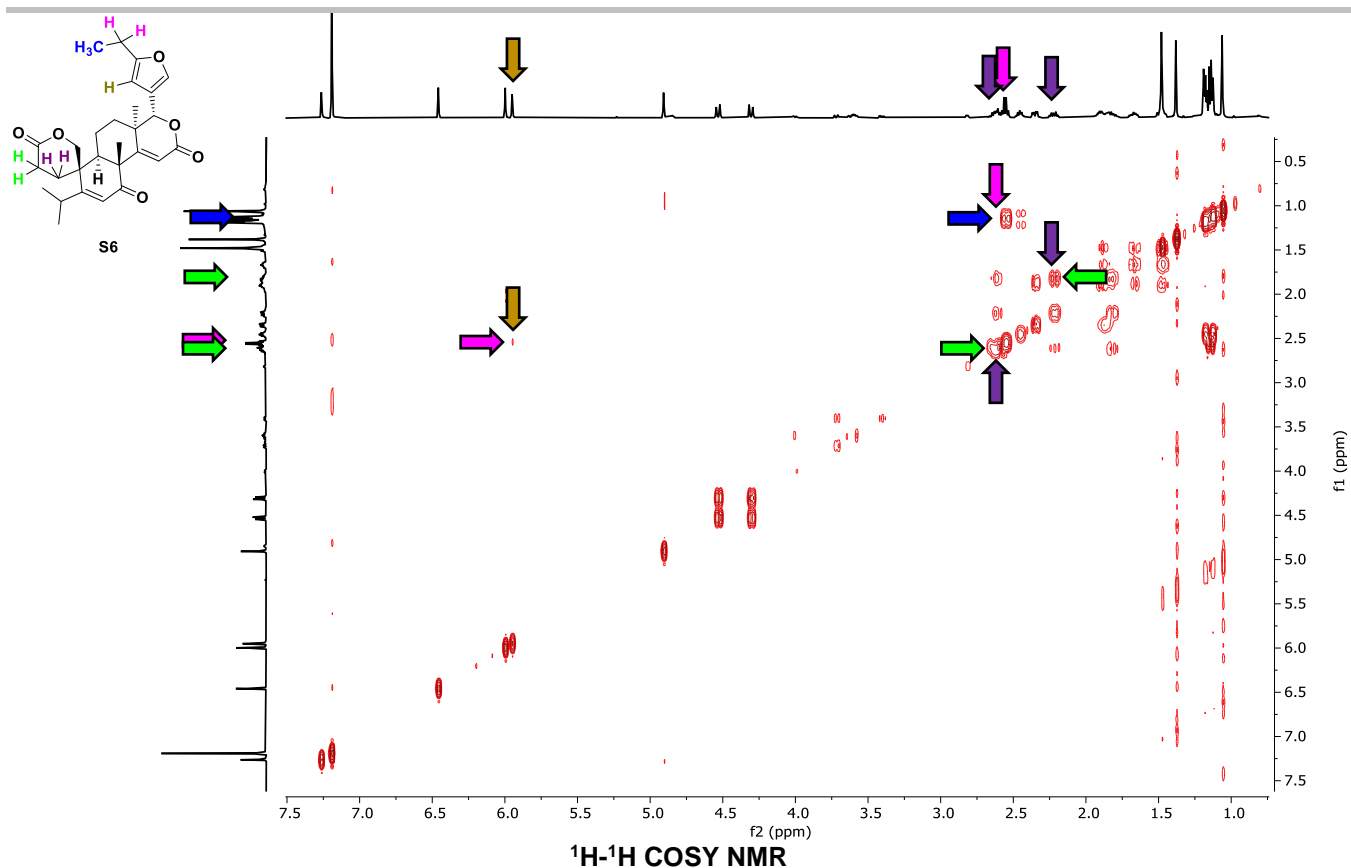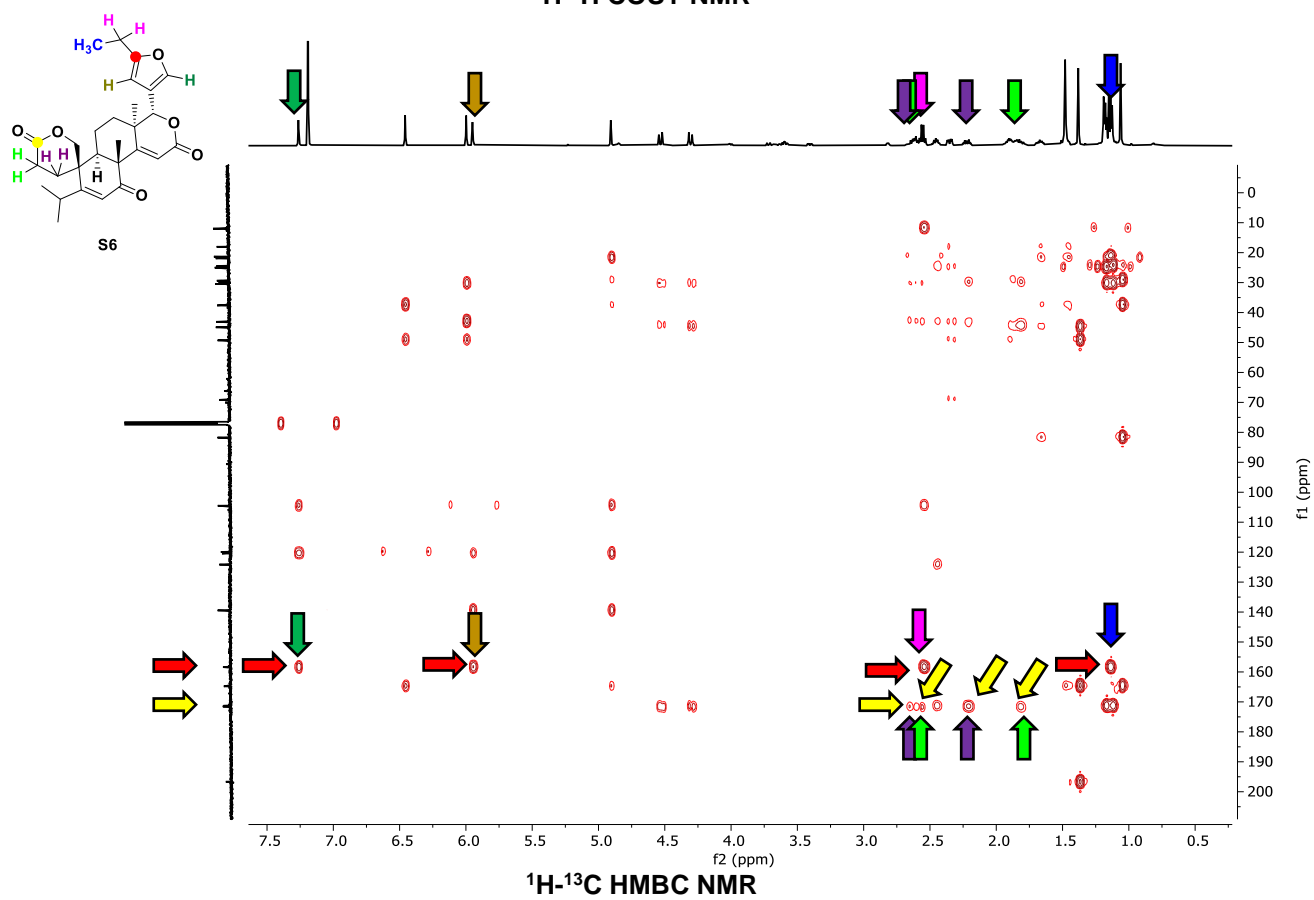

## SUPPORTING INFORMATION

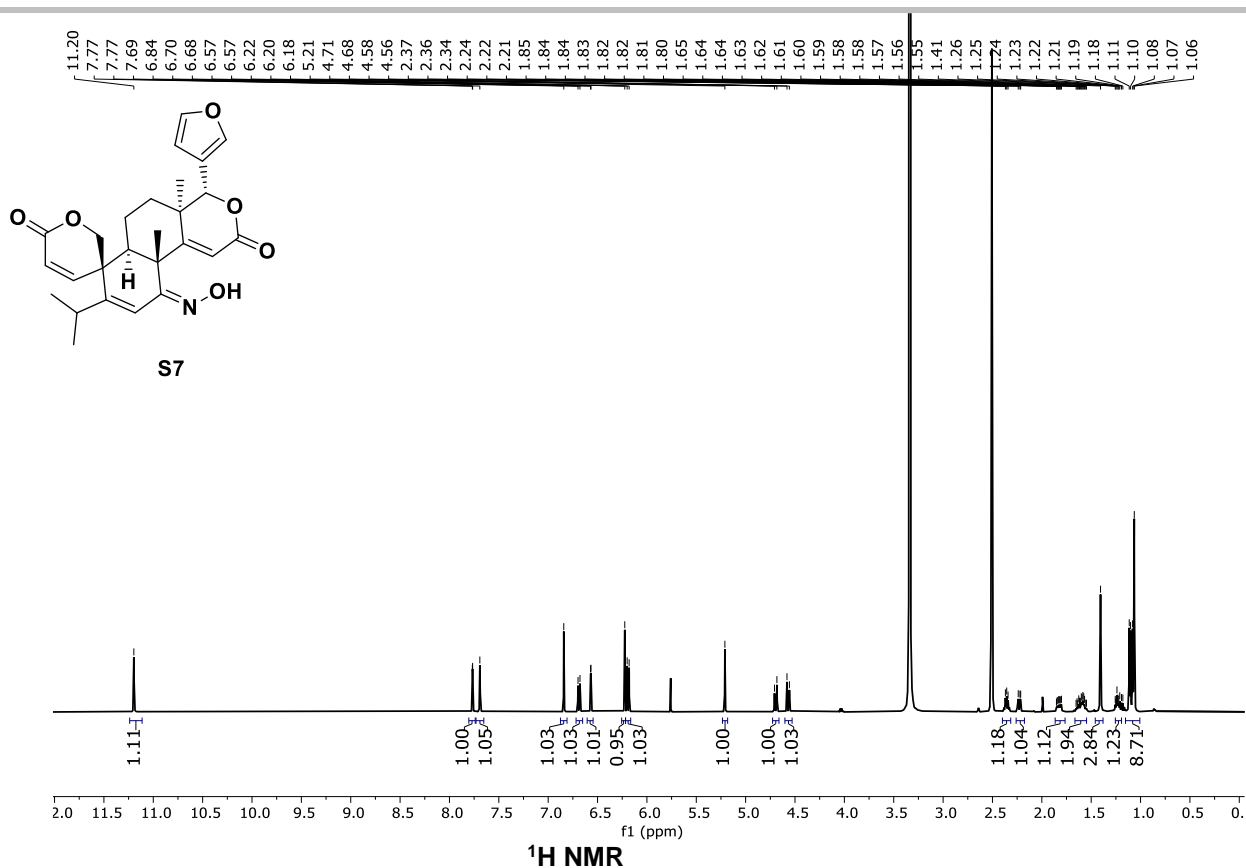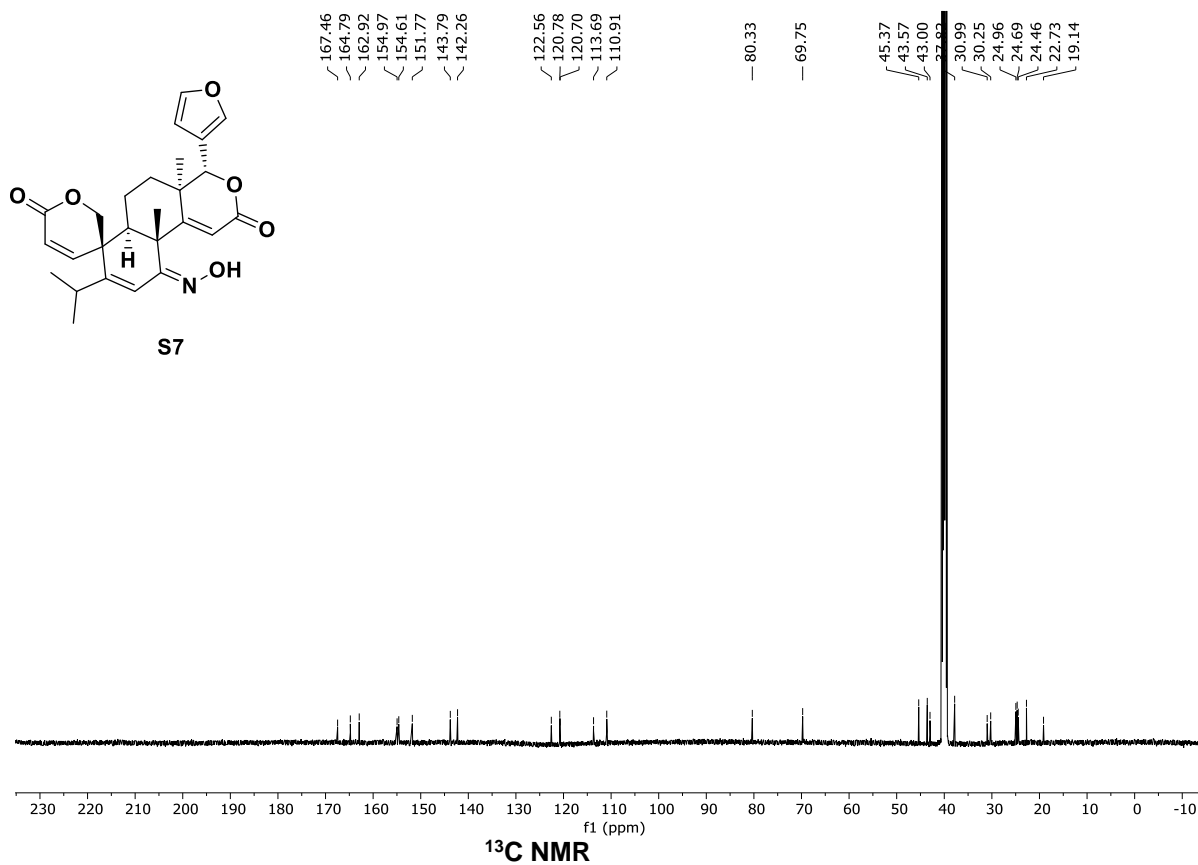

## SUPPORTING INFORMATION

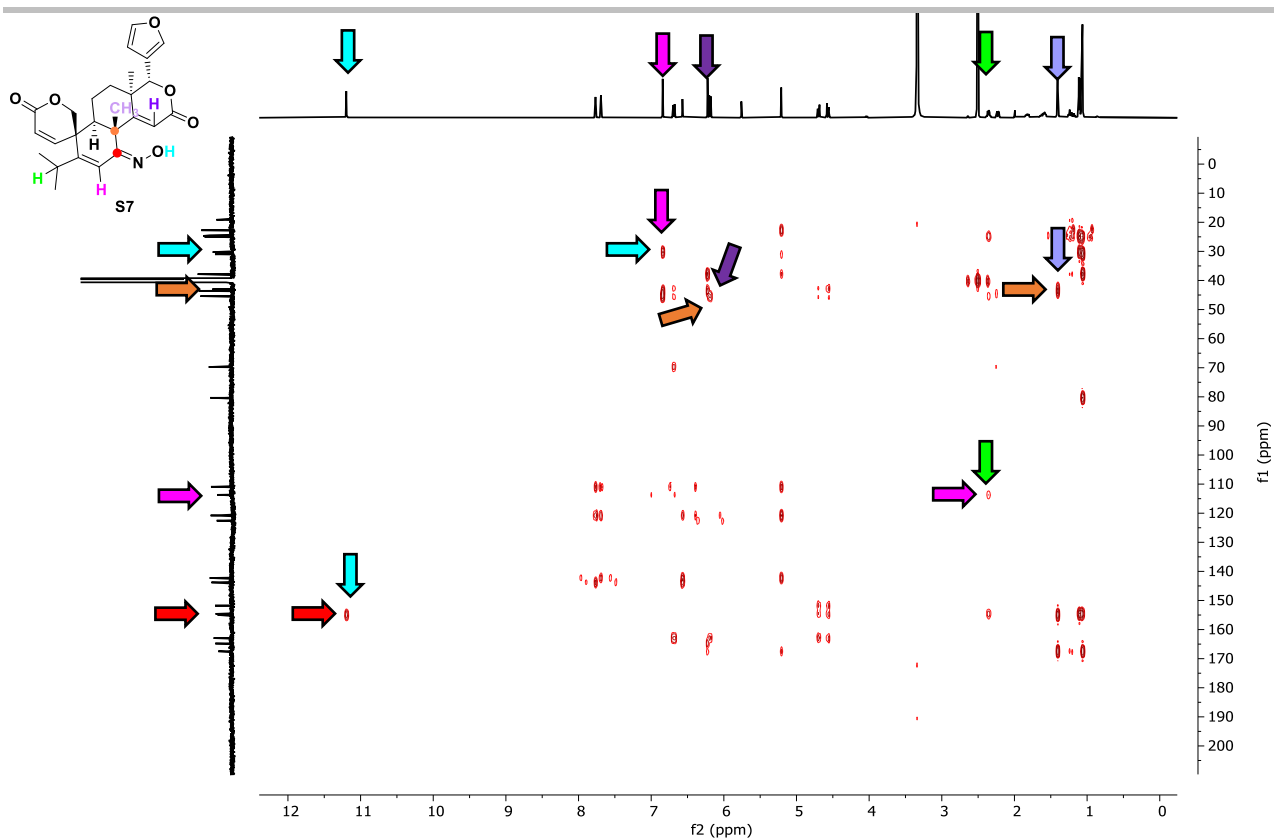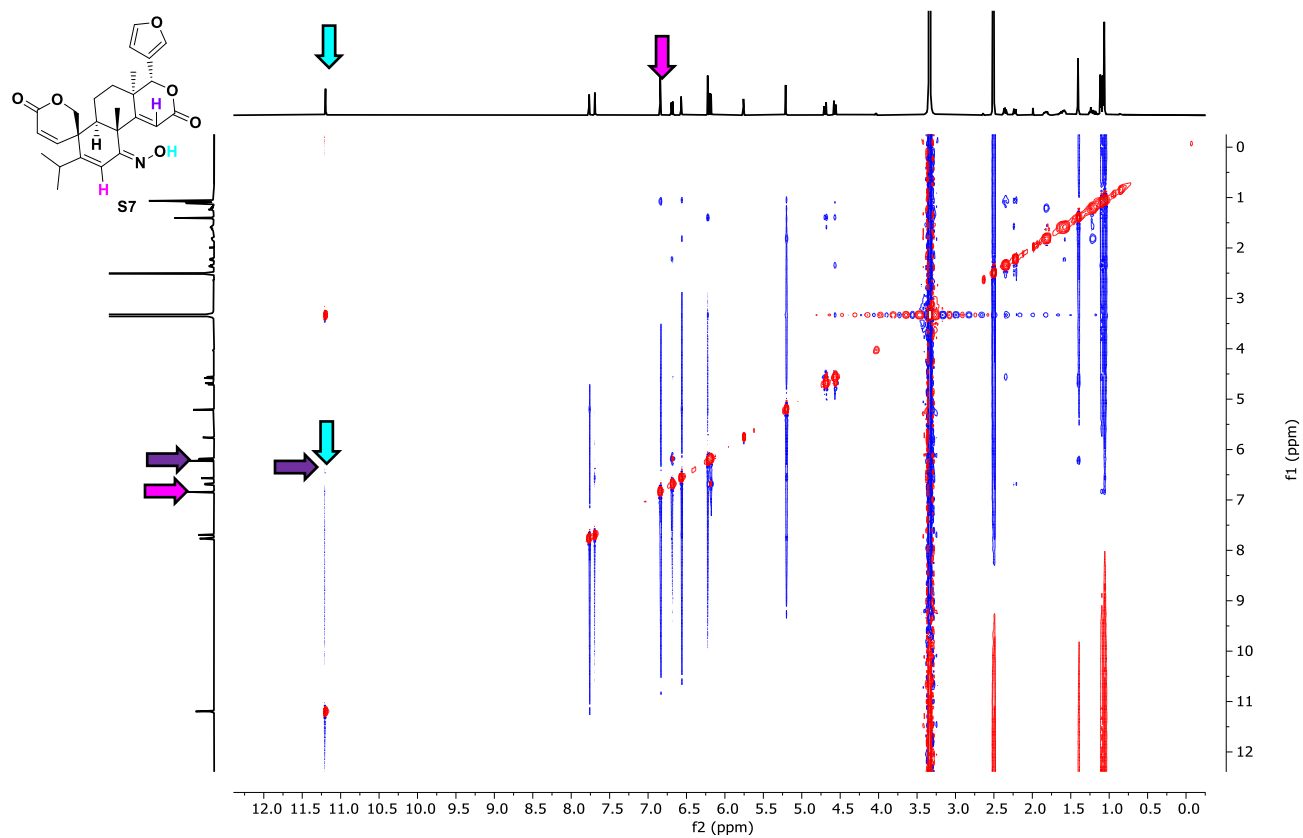



## SUPPORTING INFORMATION

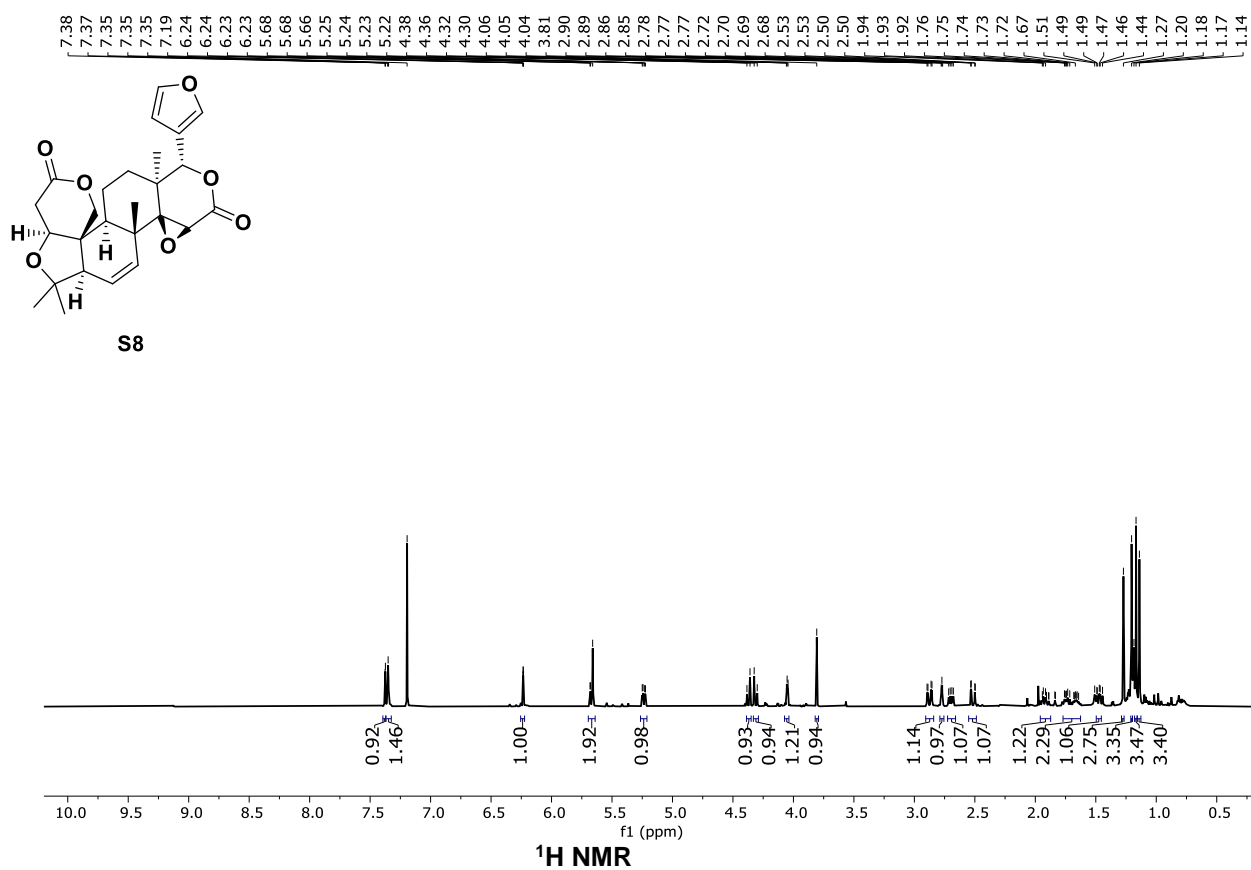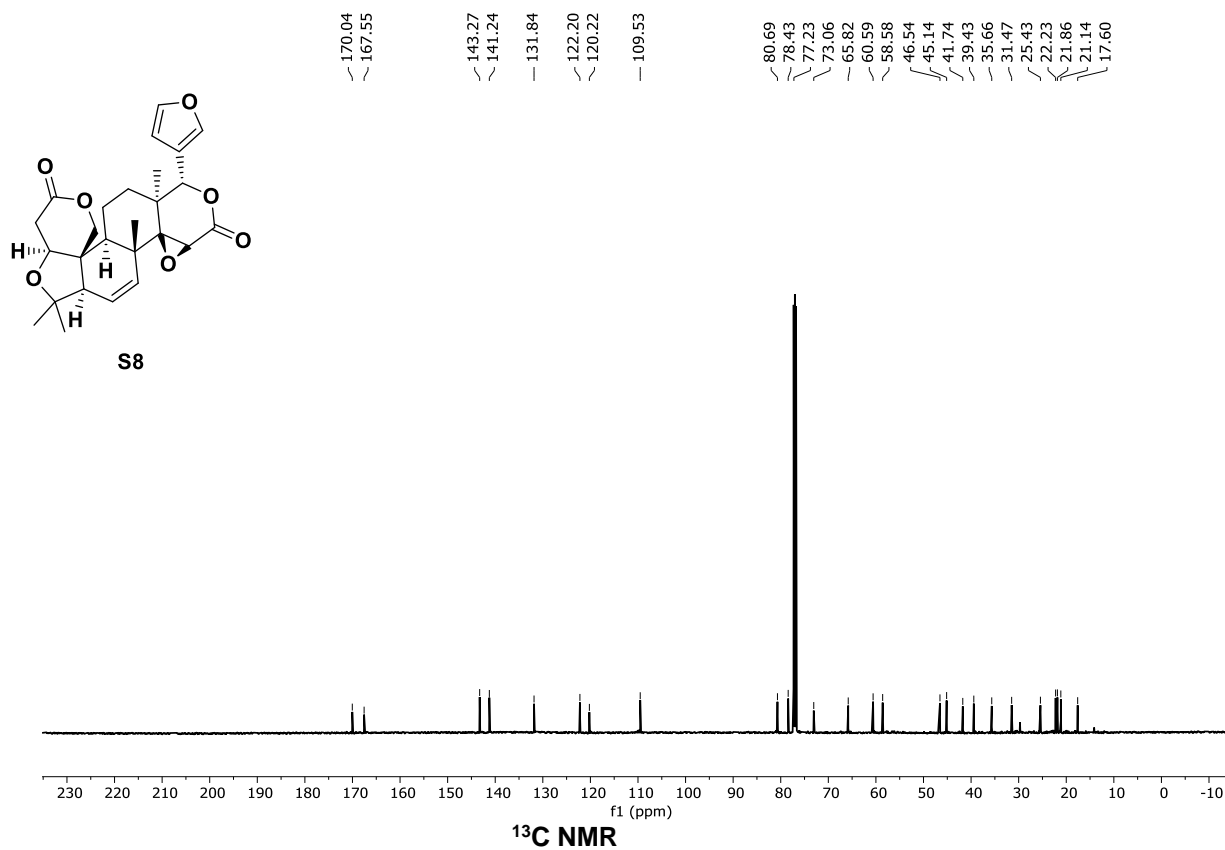

## SUPPORTING INFORMATION

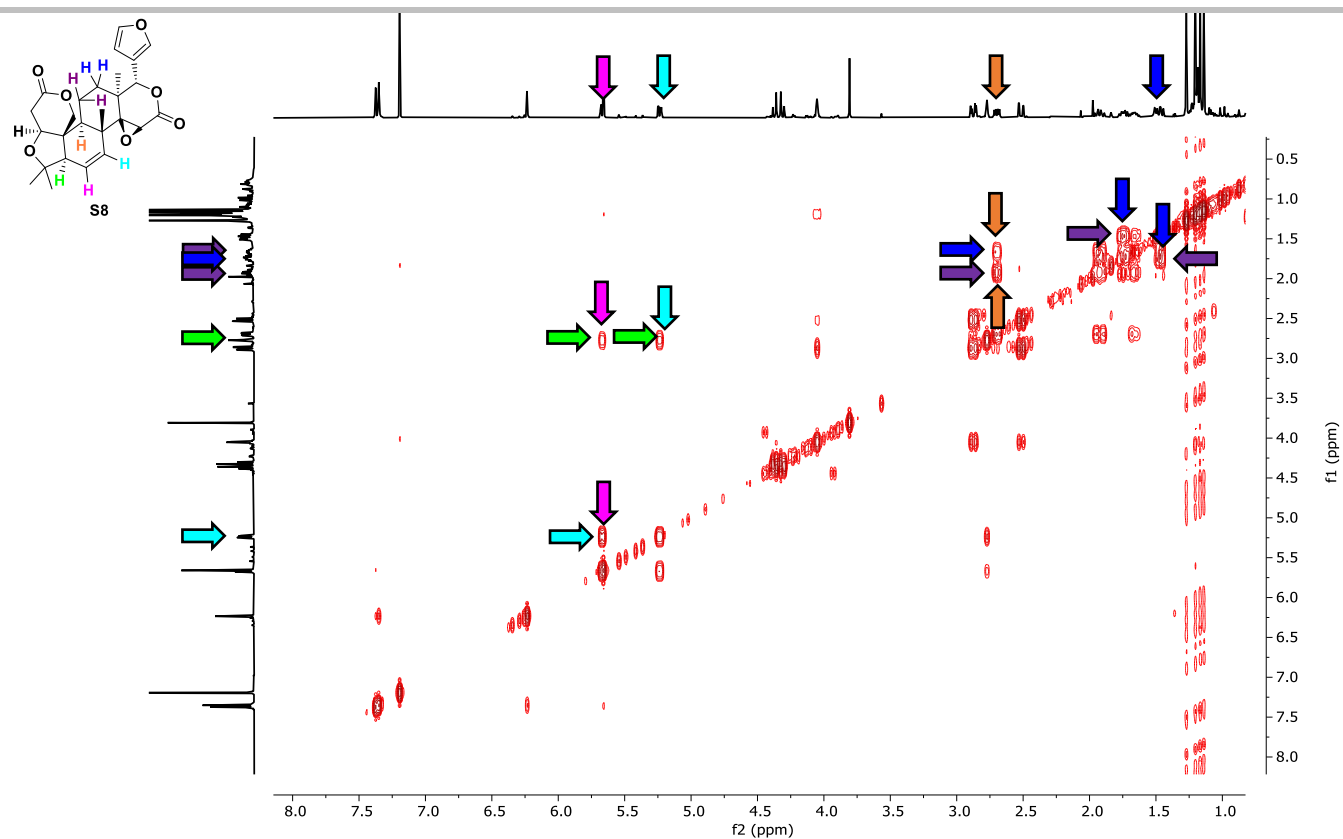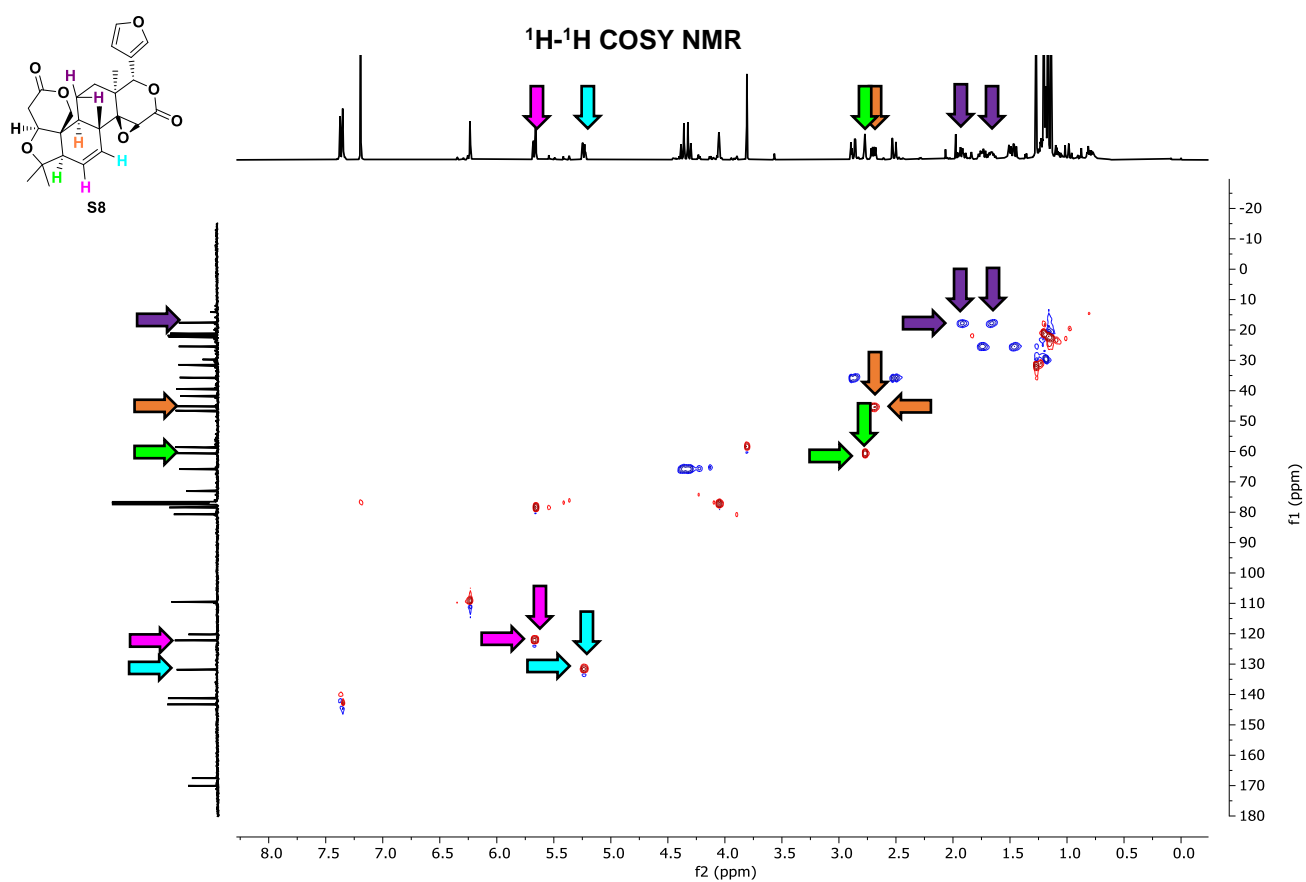

## SUPPORTING INFORMATION

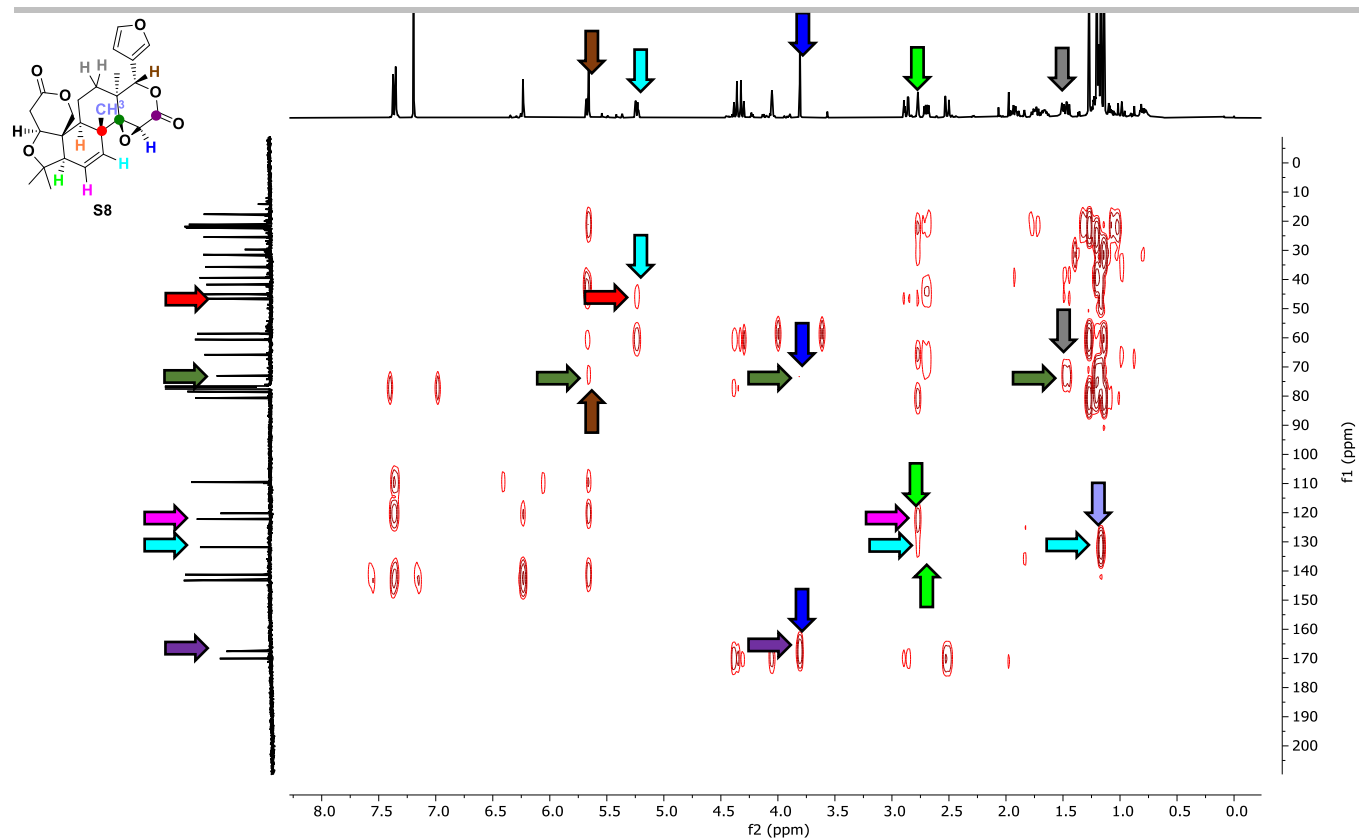

## SUPPORTING INFORMATION

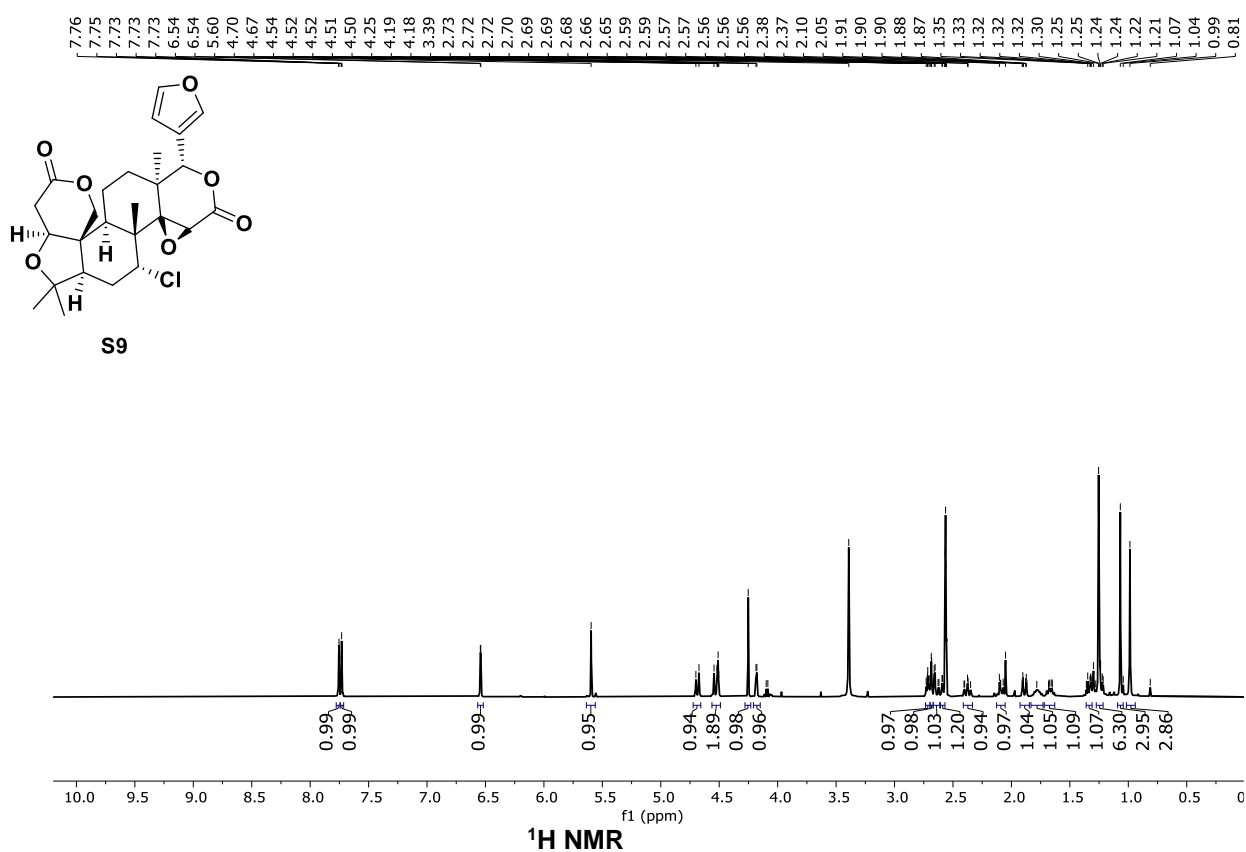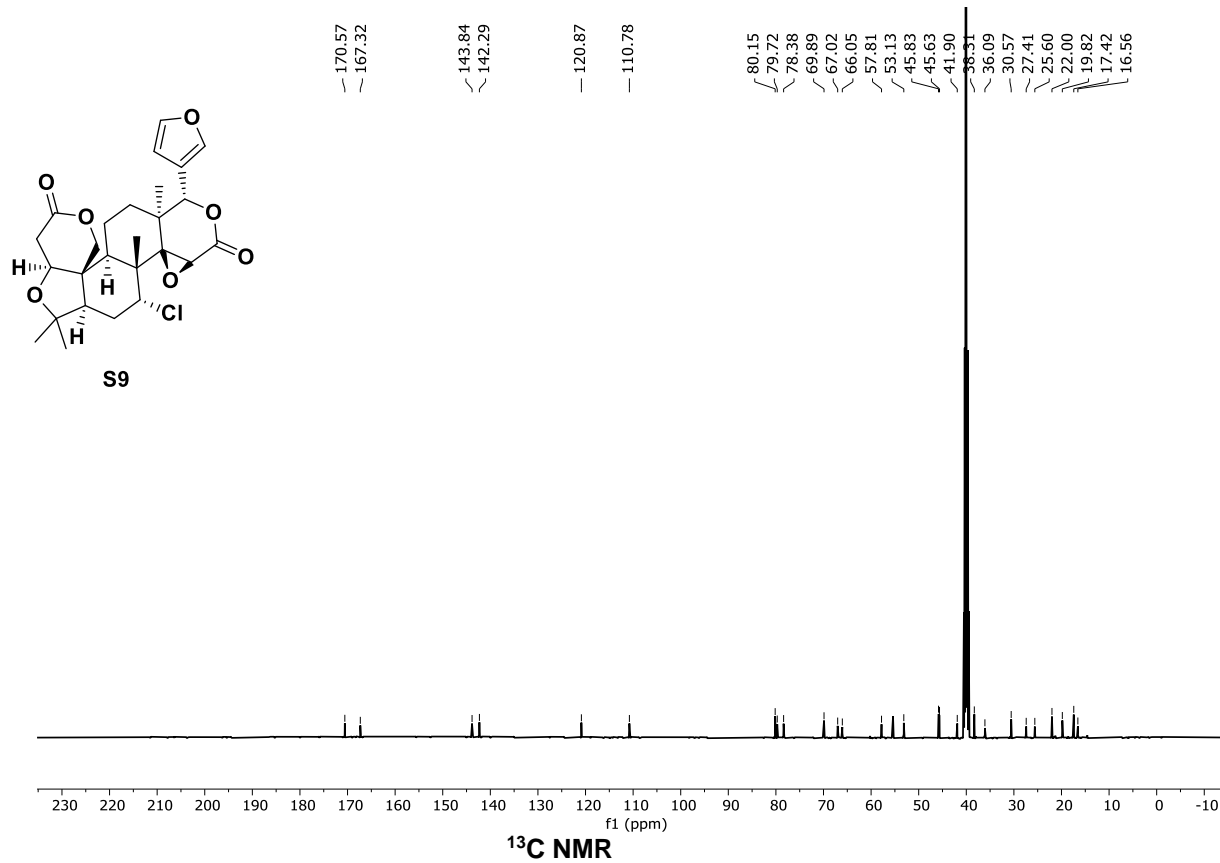

## SUPPORTING INFORMATION

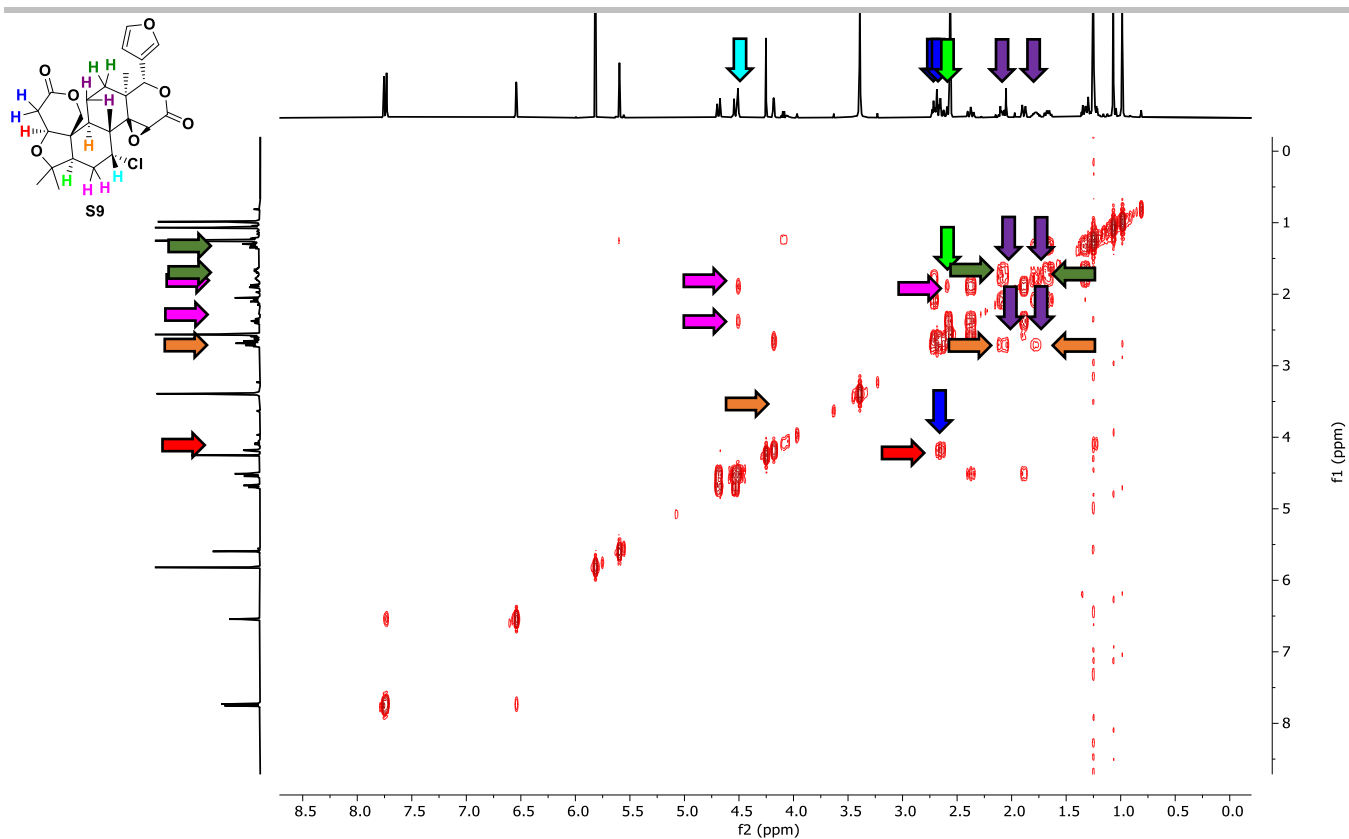 $^1\text{H}$ - $^1\text{H}$  COSY NMR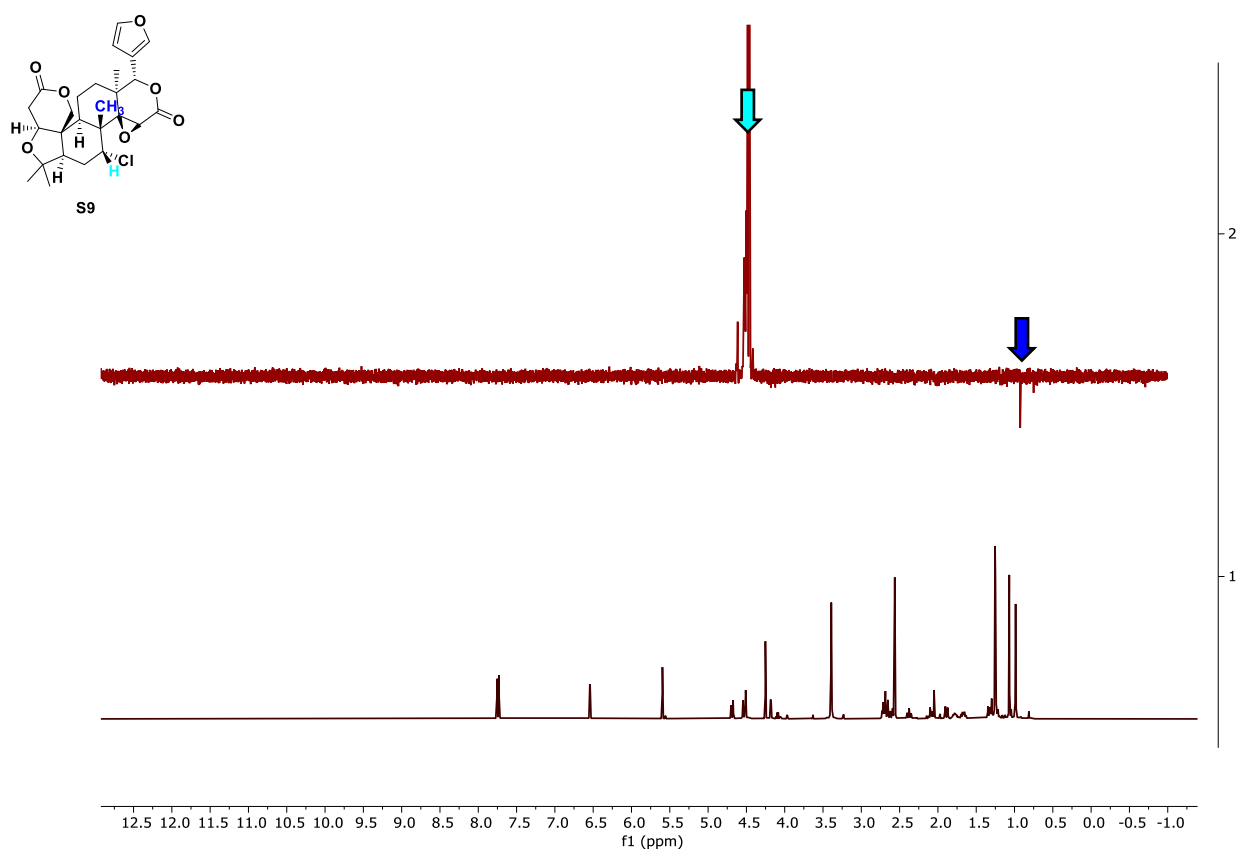 $^1\text{H}$ - $^1\text{H}$  1D NOESY NMR



## SUPPORTING INFORMATION

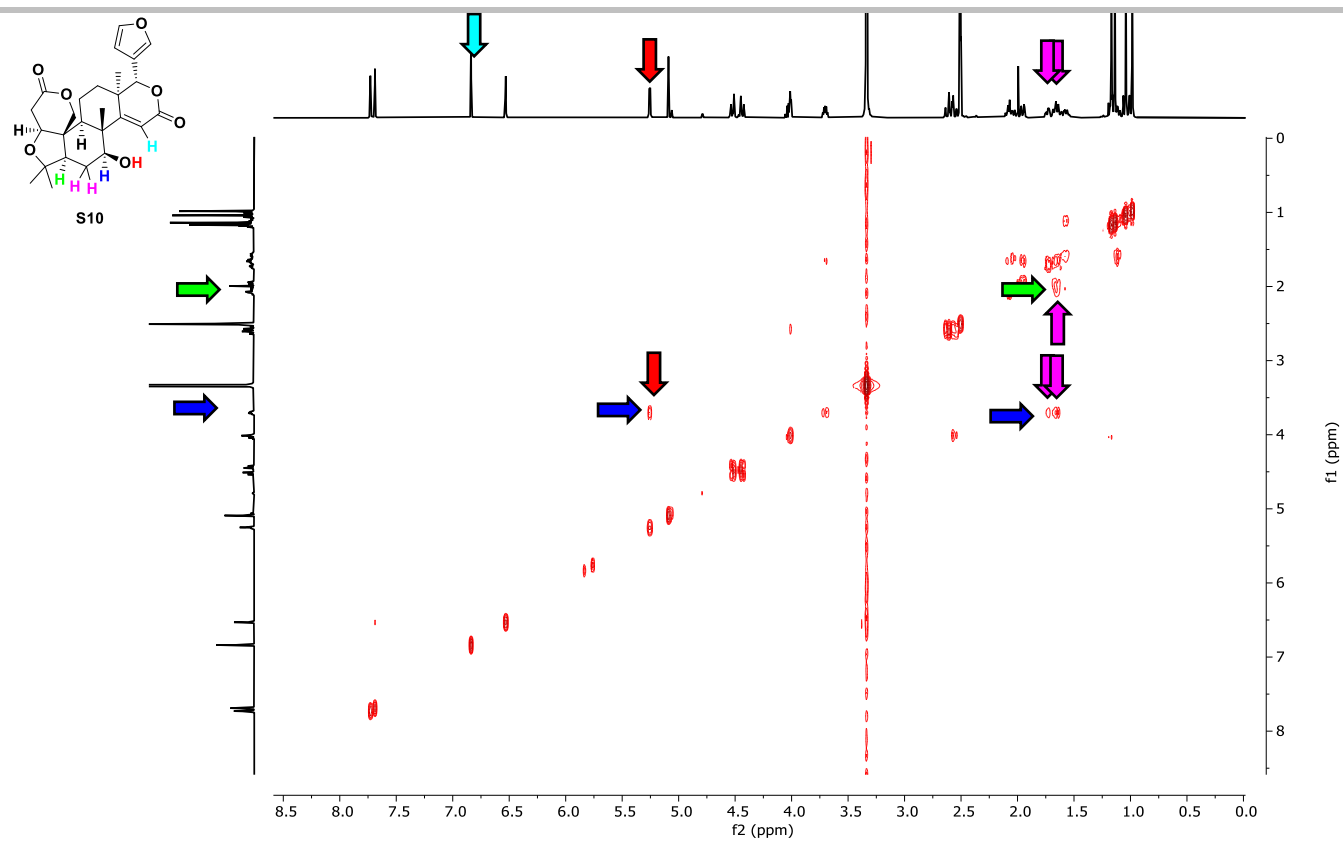 $^1\text{H}$ - $^1\text{H}$  COSY NMR

## SUPPORTING INFORMATION

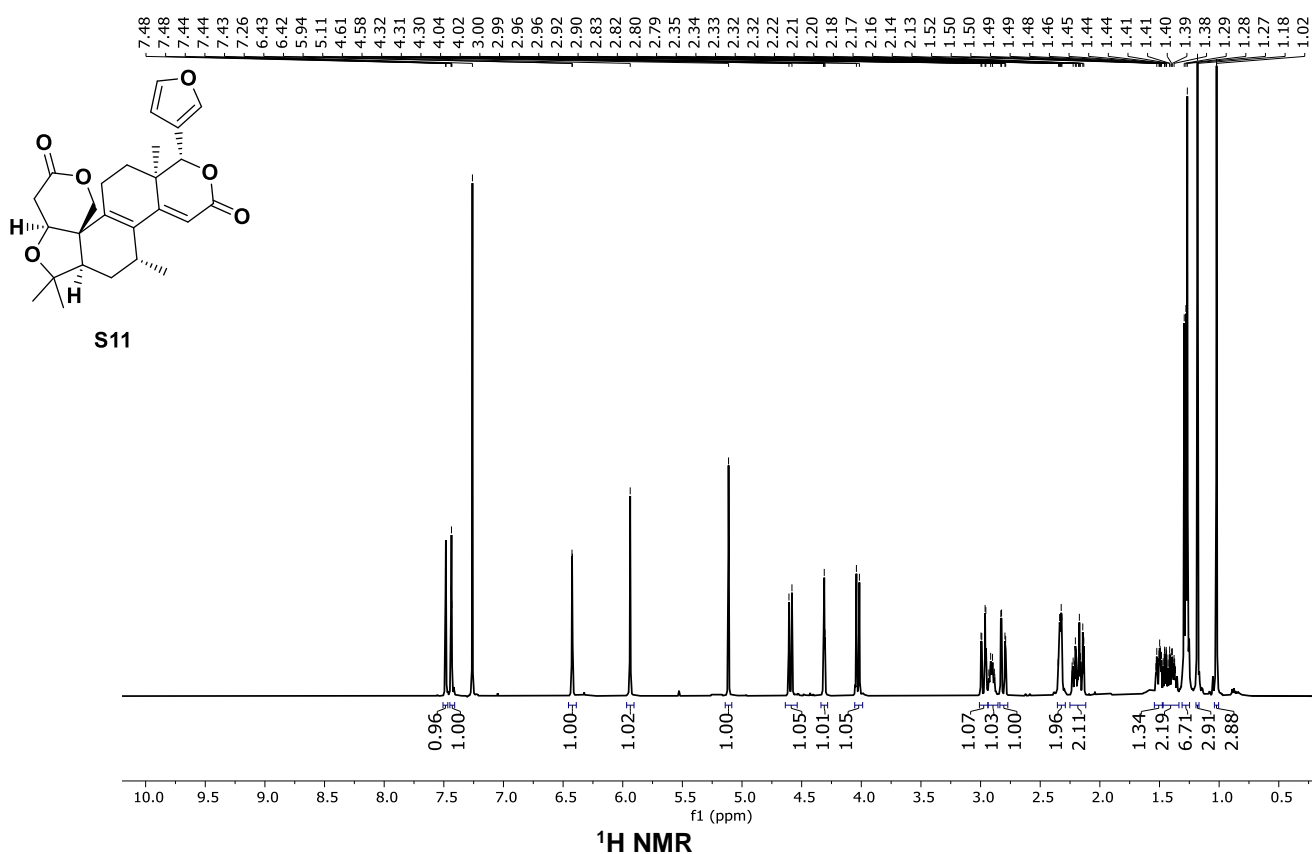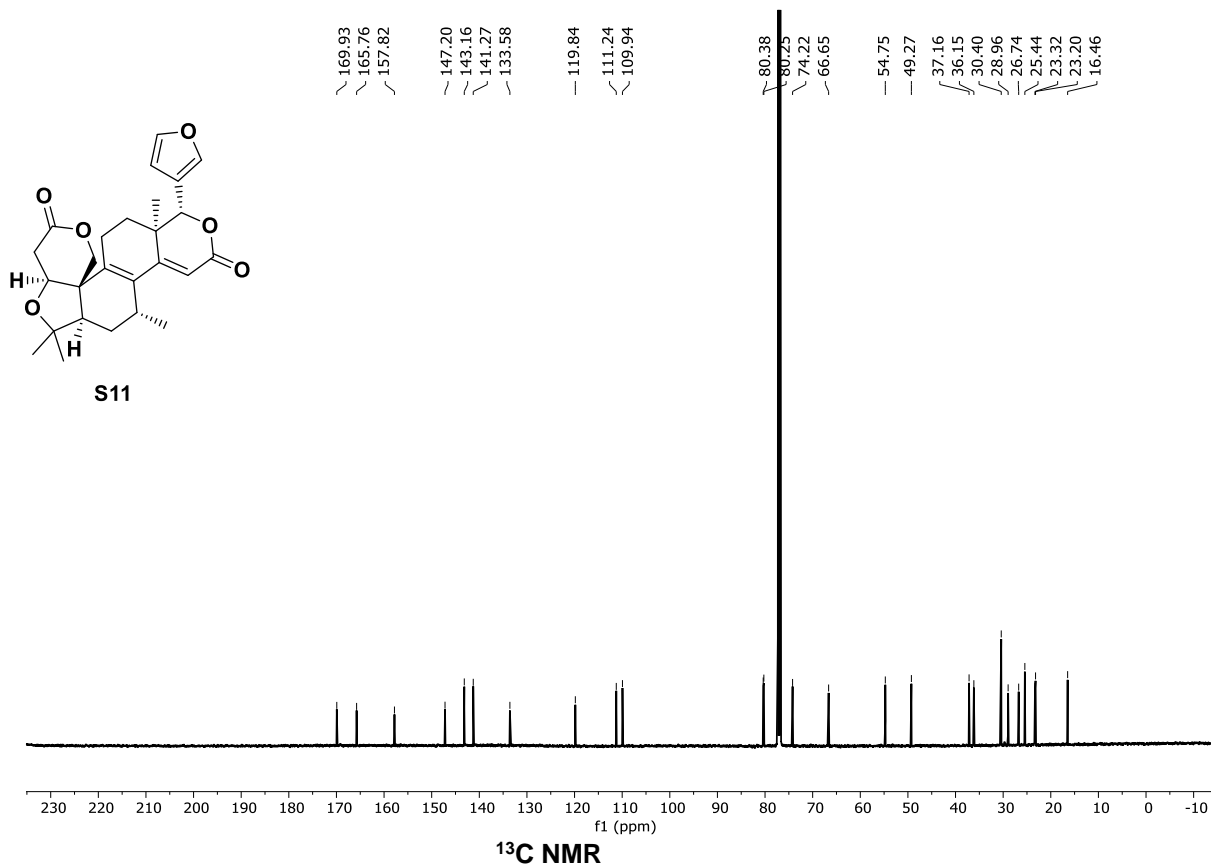



## SUPPORTING INFORMATION

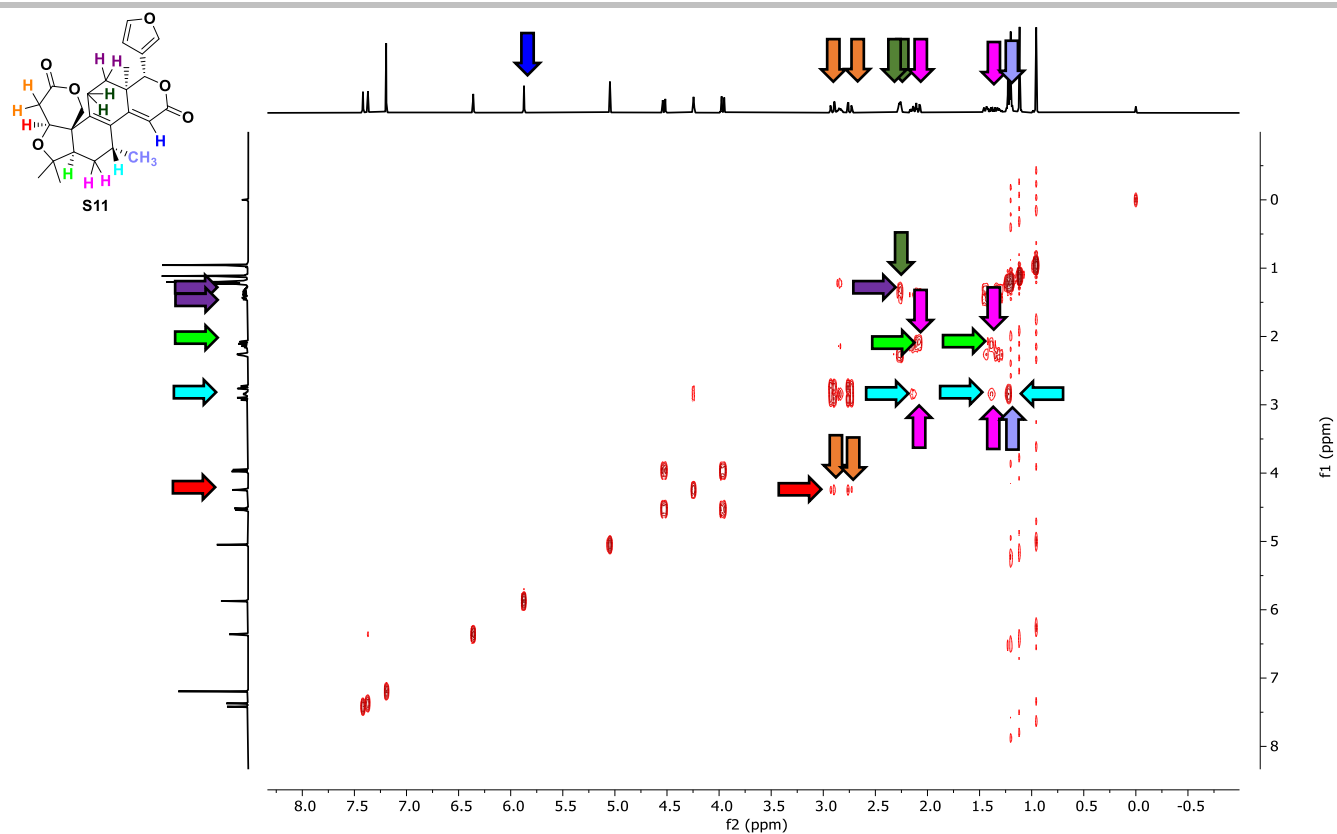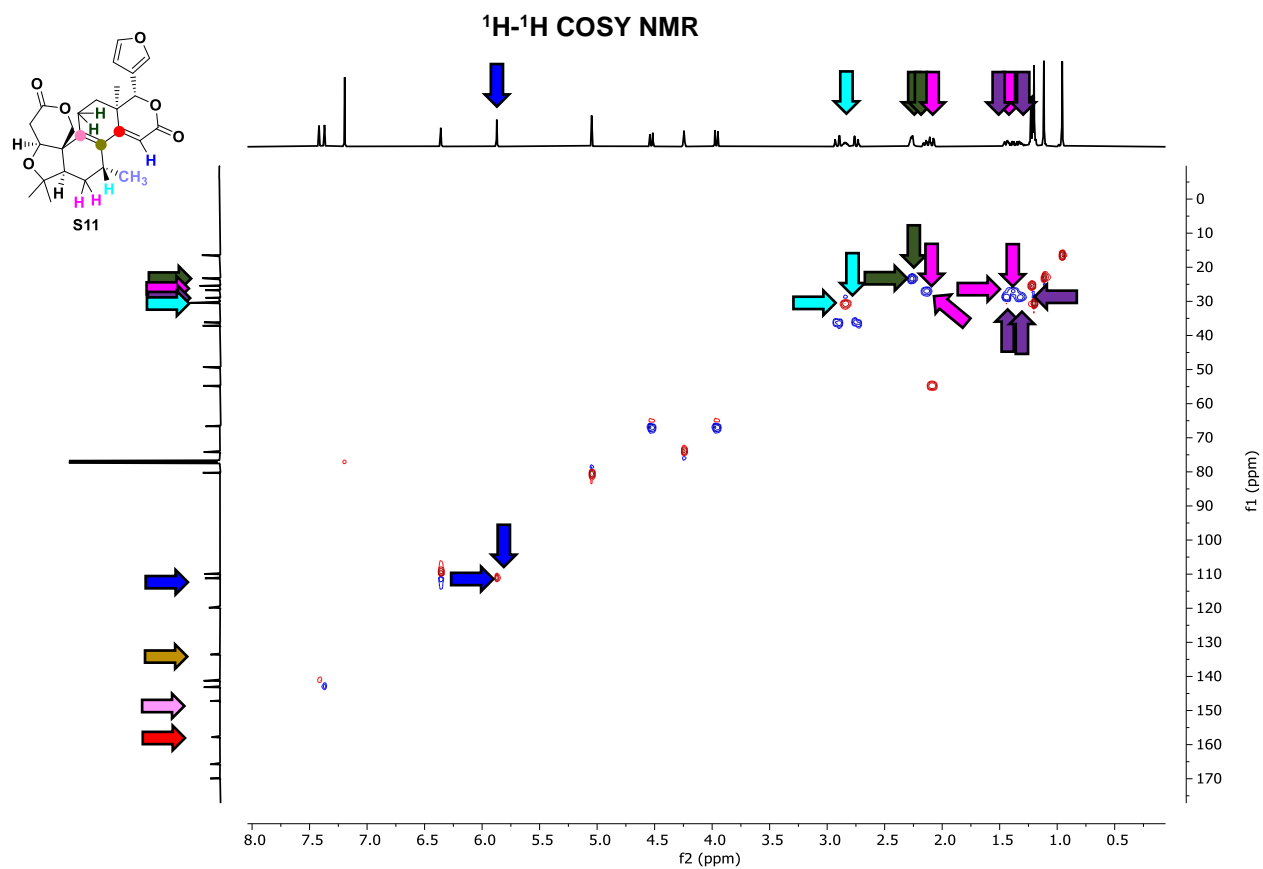

## SUPPORTING INFORMATION

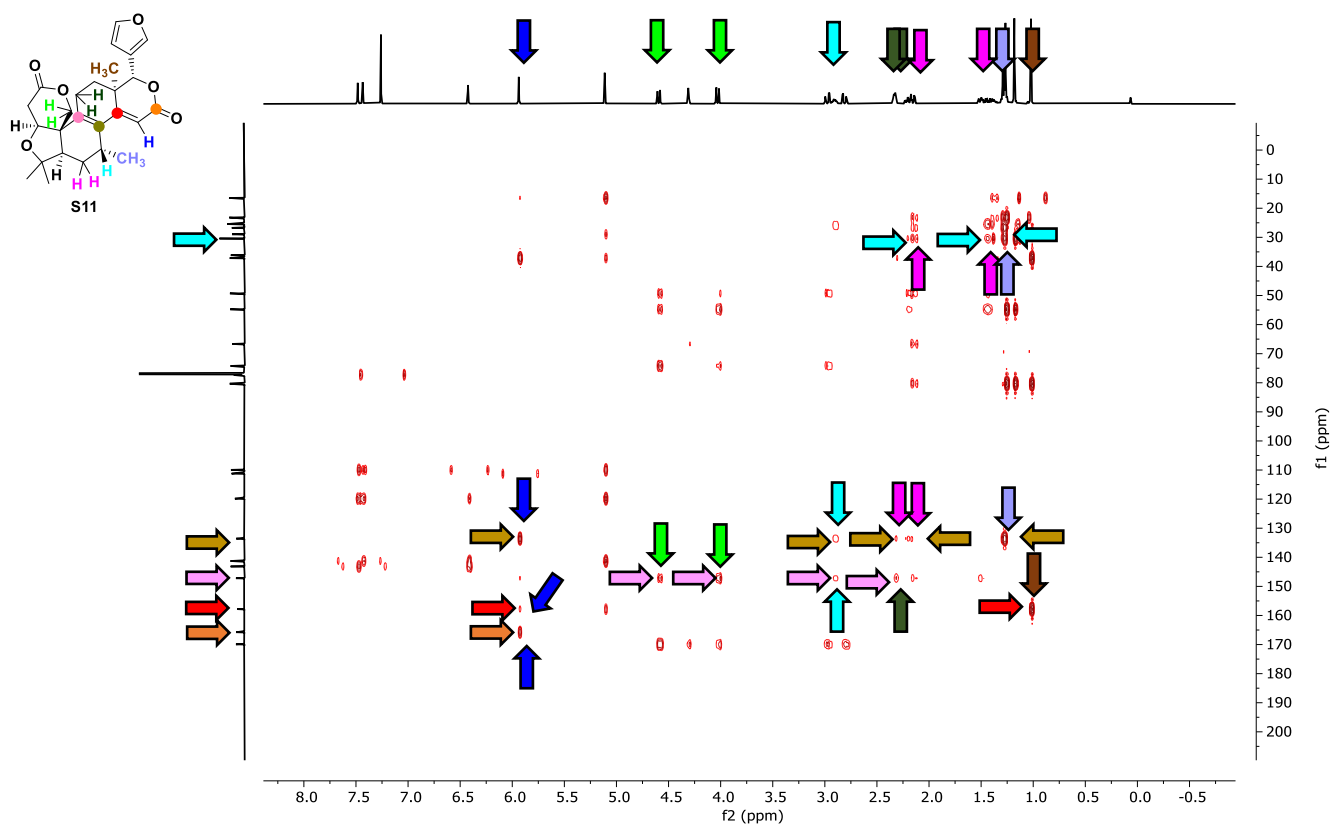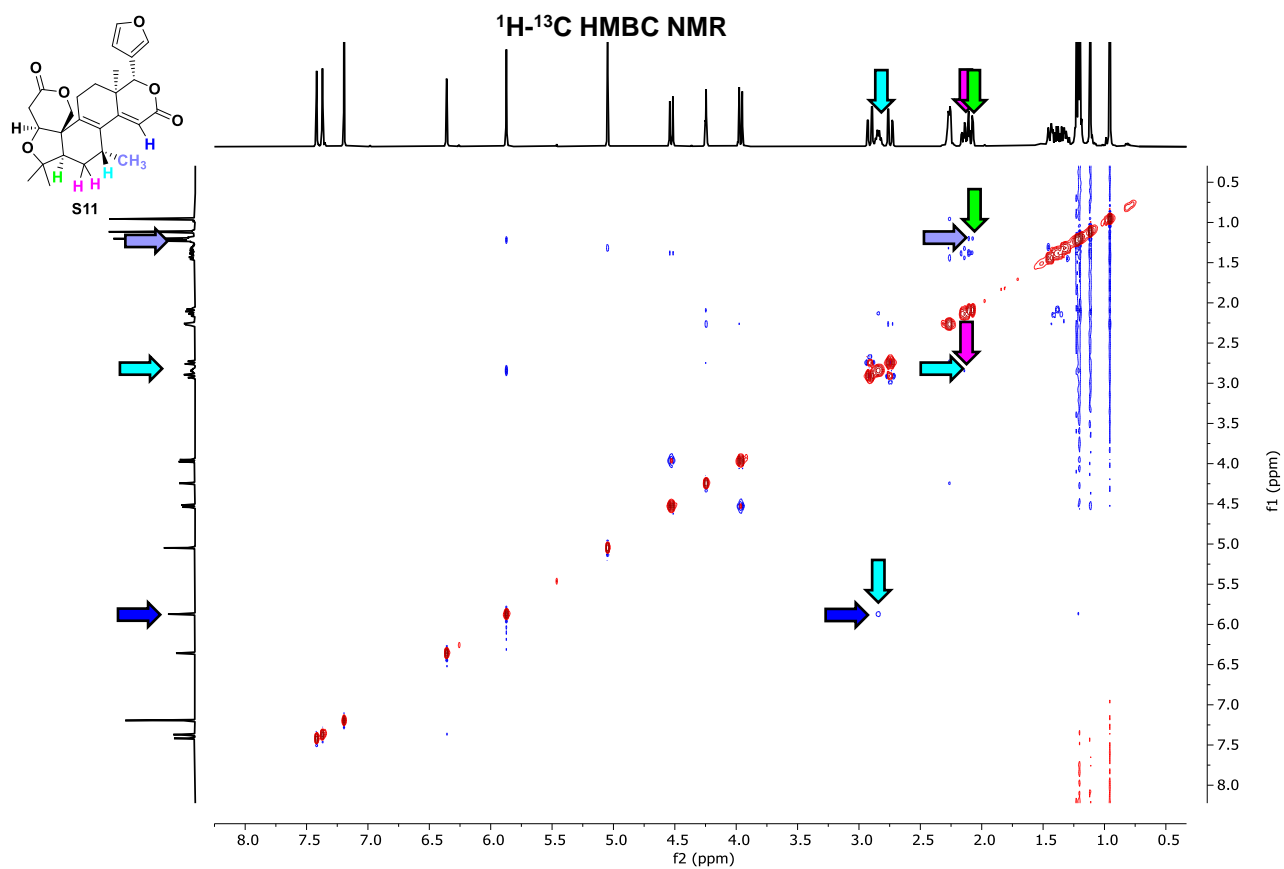**<sup>1</sup>H-<sup>1</sup>H NOESY NMR**

## SUPPORTING INFORMATION

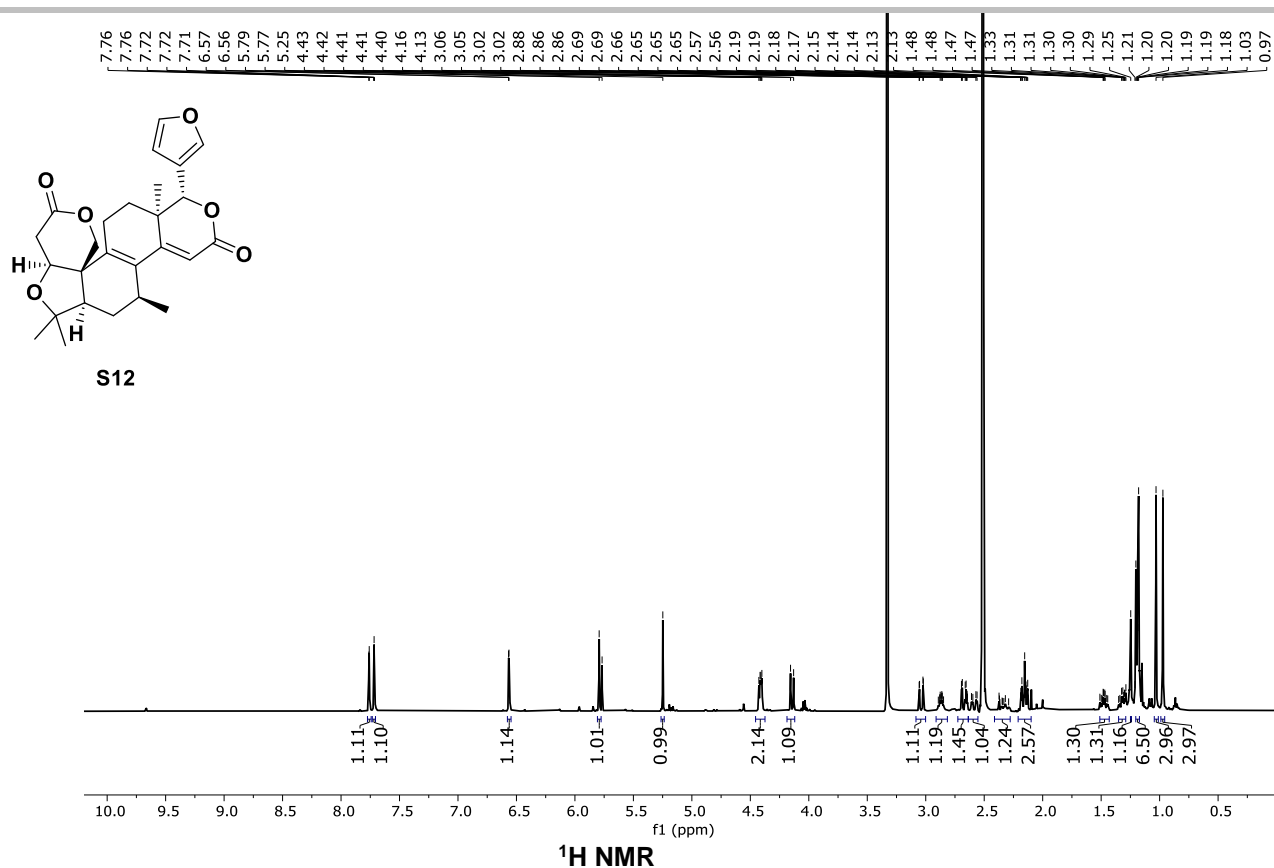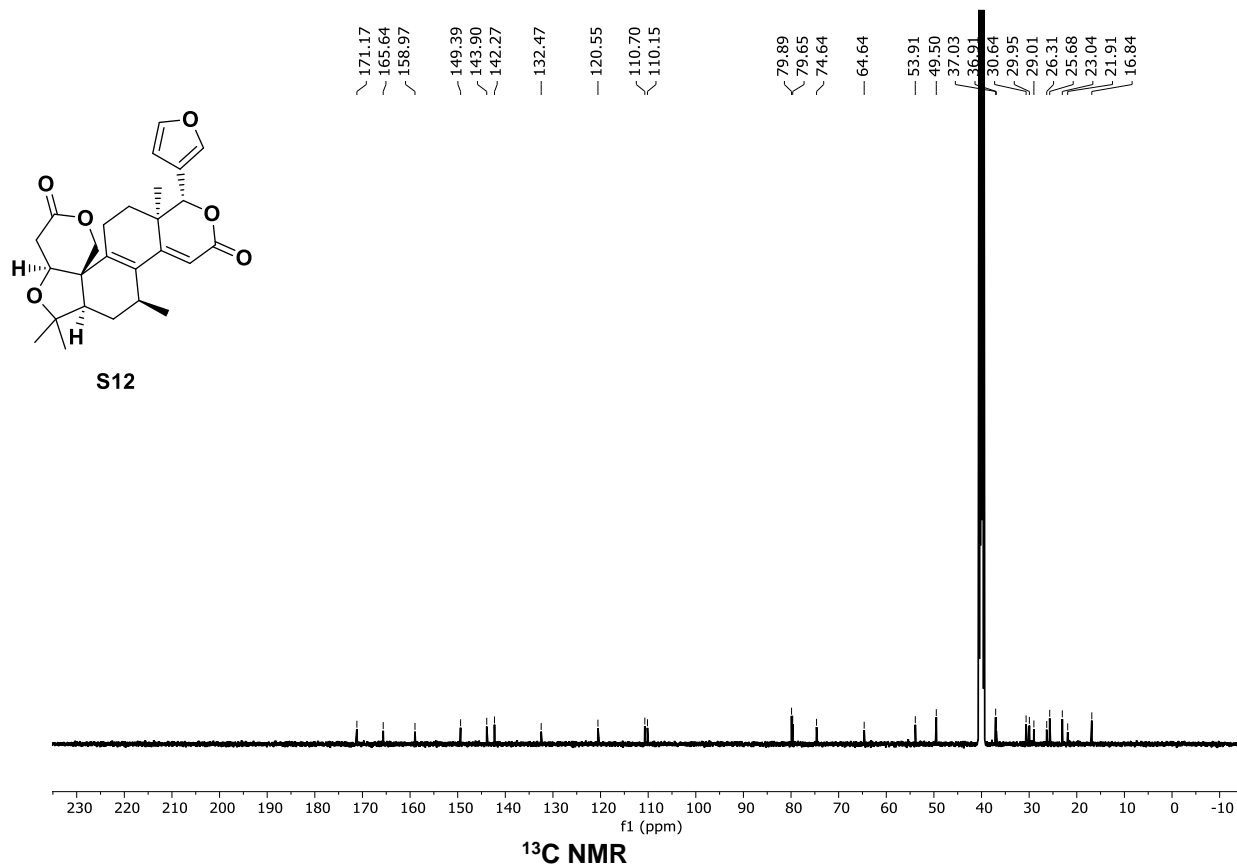

## SUPPORTING INFORMATION

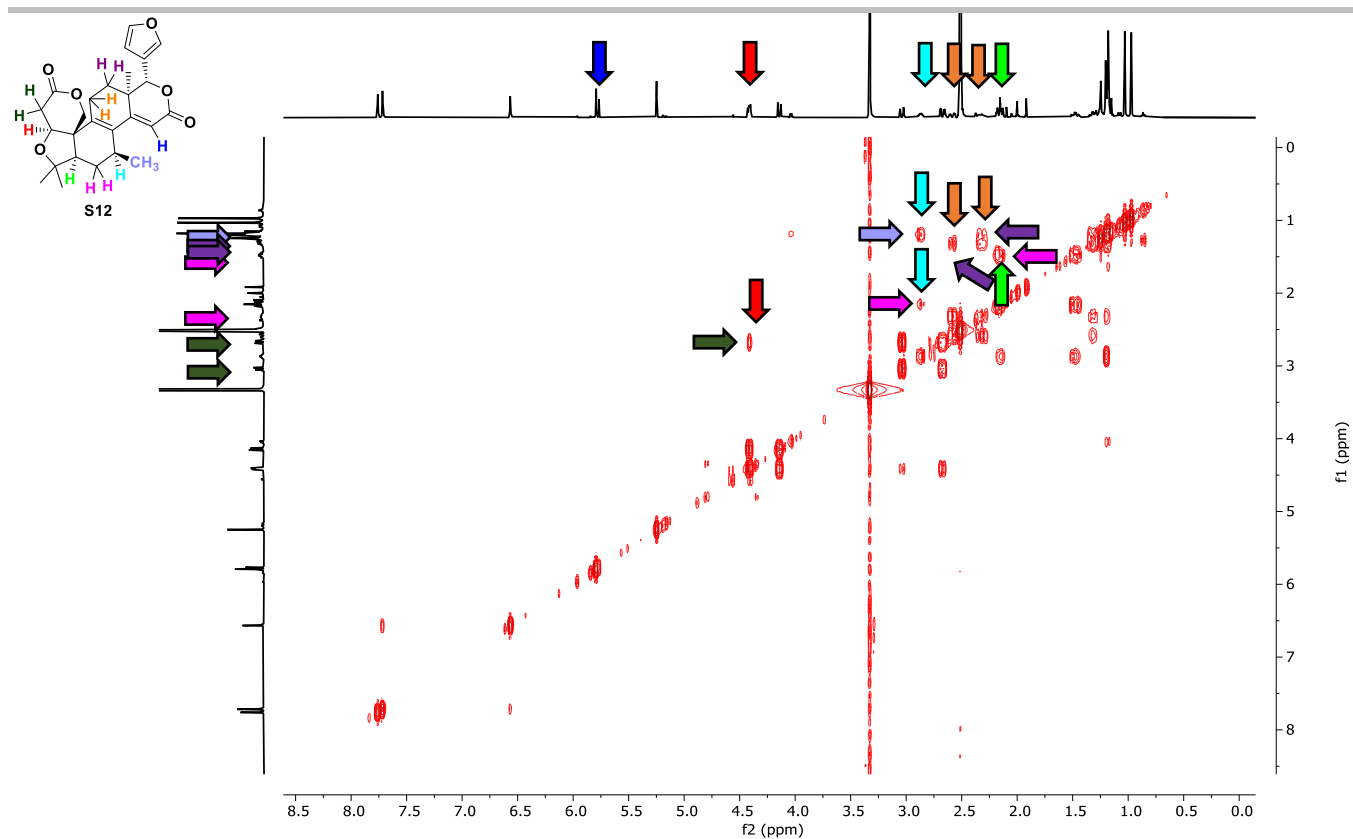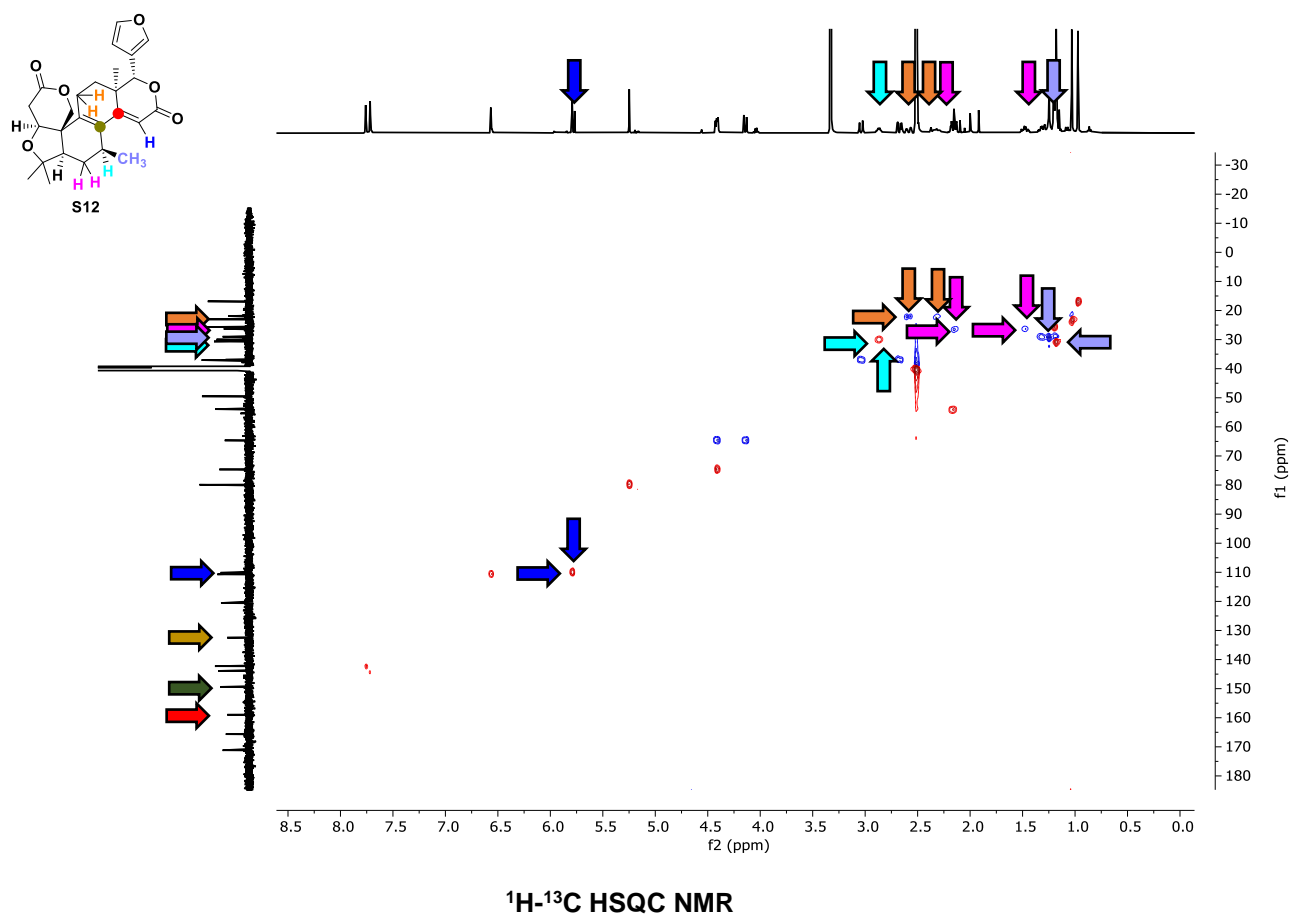

## SUPPORTING INFORMATION

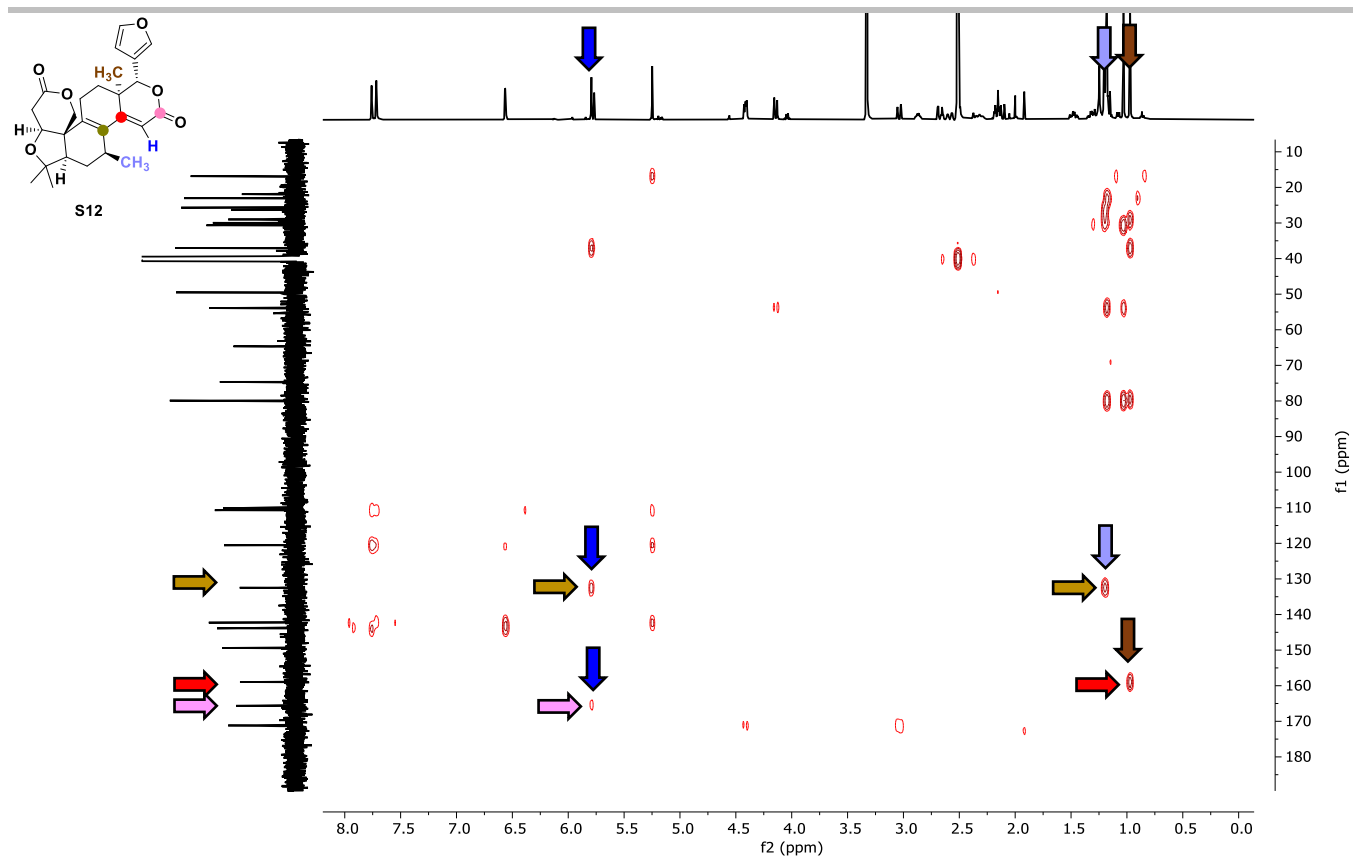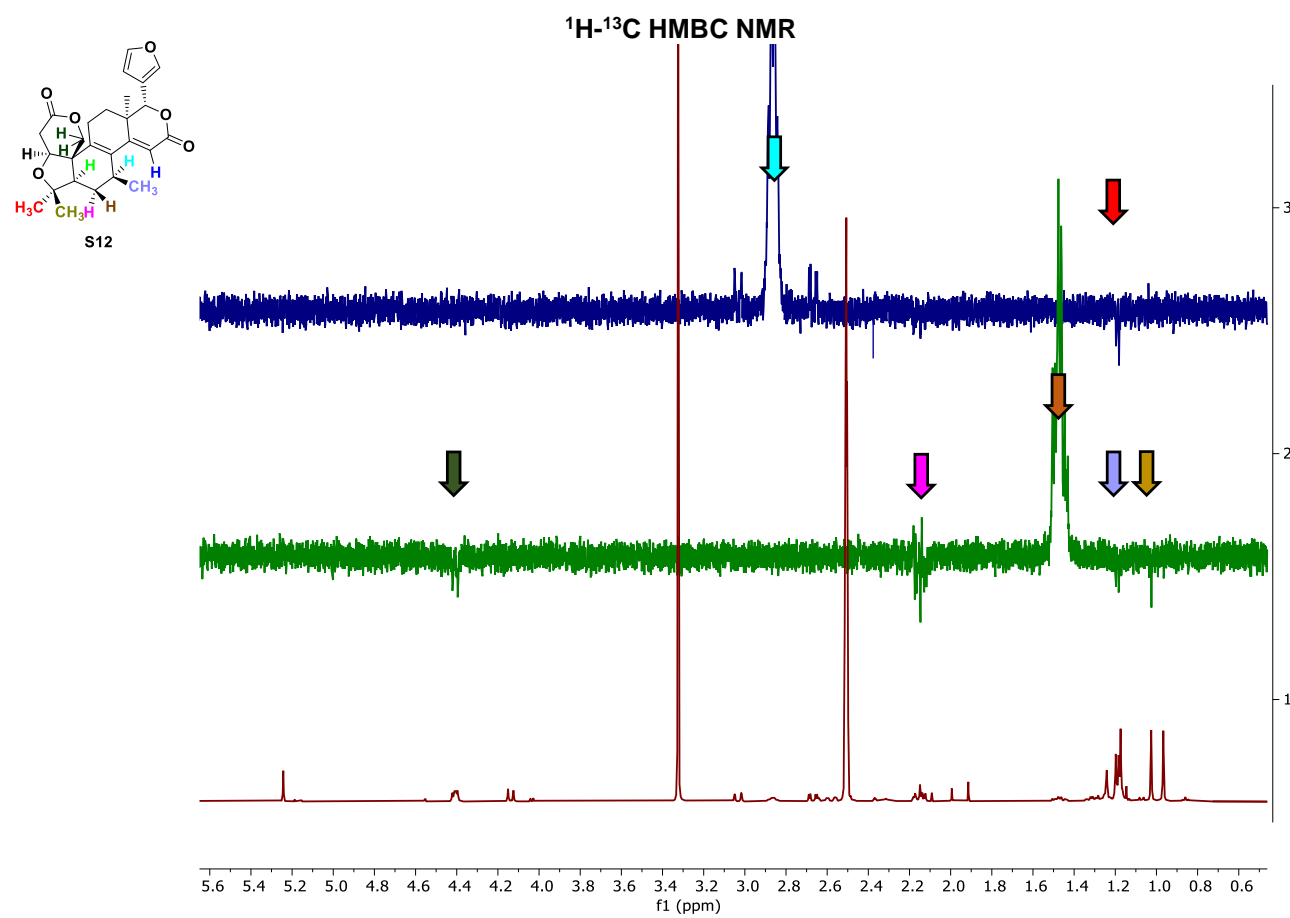**<sup>1</sup>H-<sup>1</sup>H 1D NOESY NMR**

## SUPPORTING INFORMATION

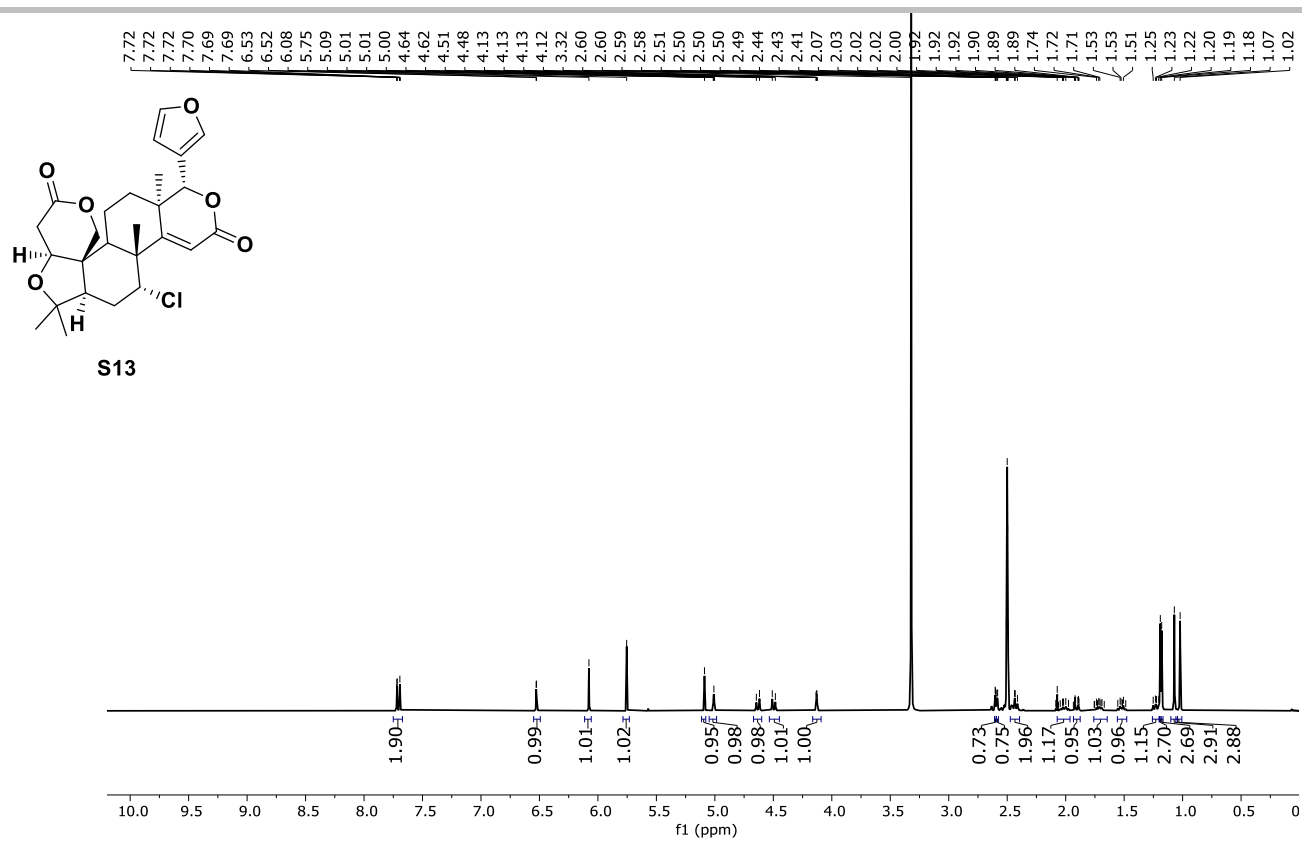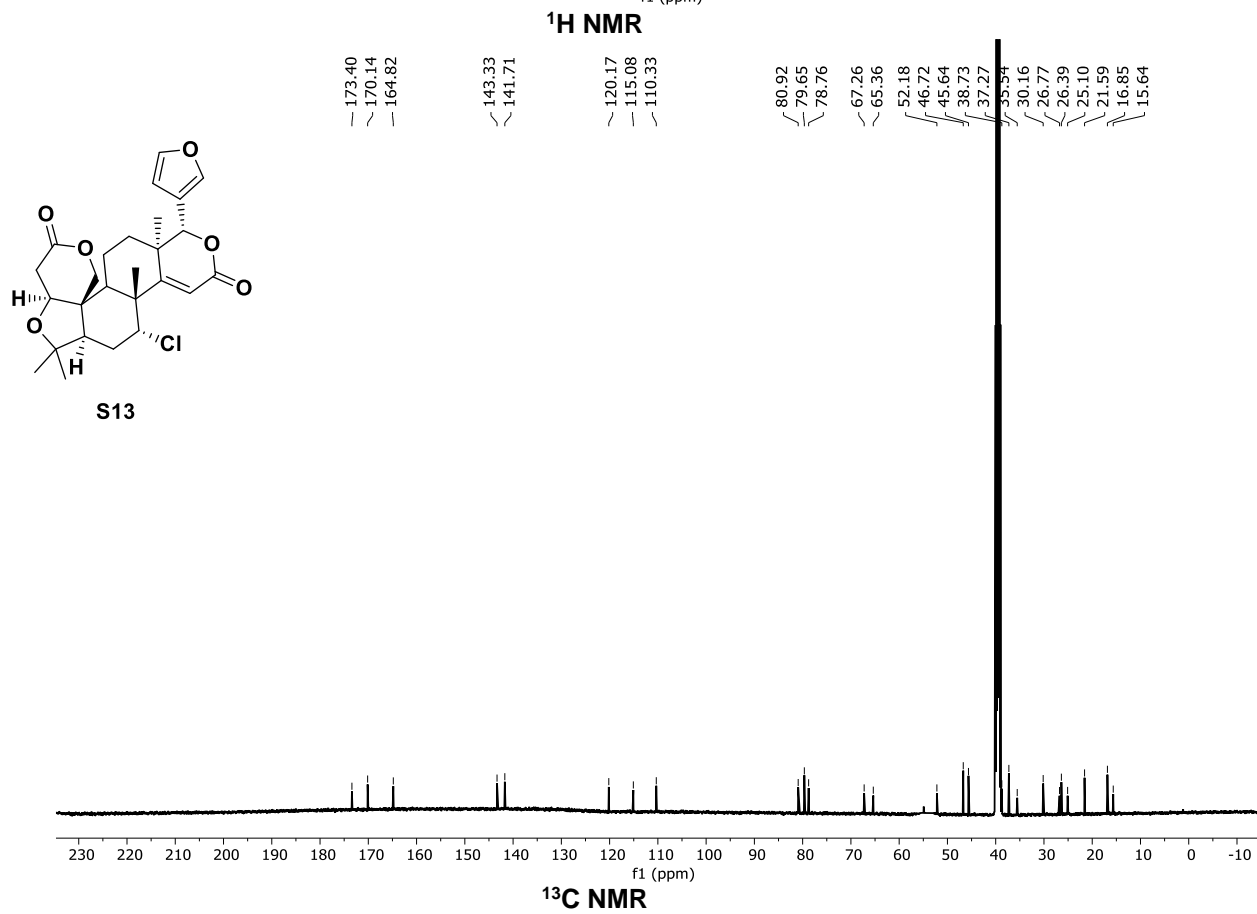

## SUPPORTING INFORMATION

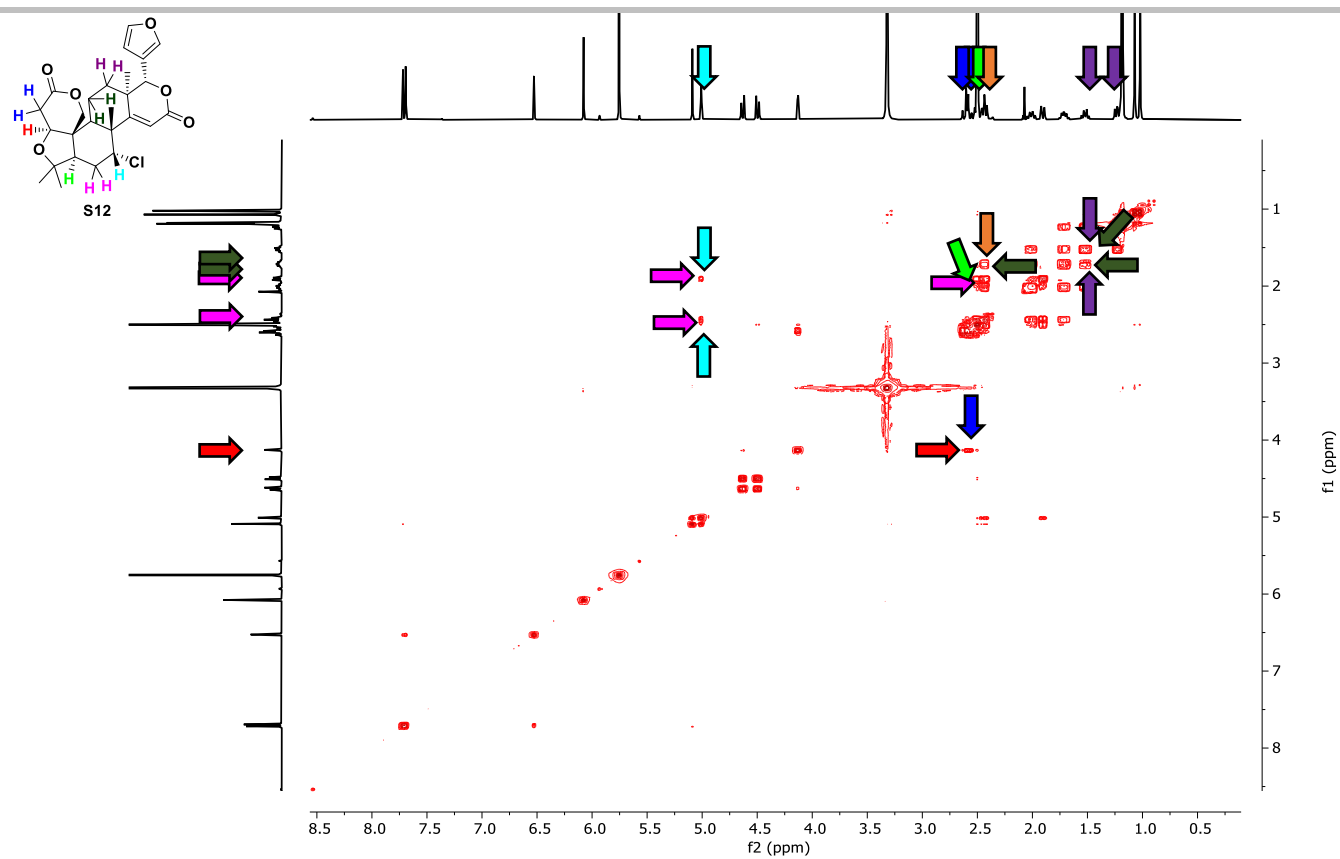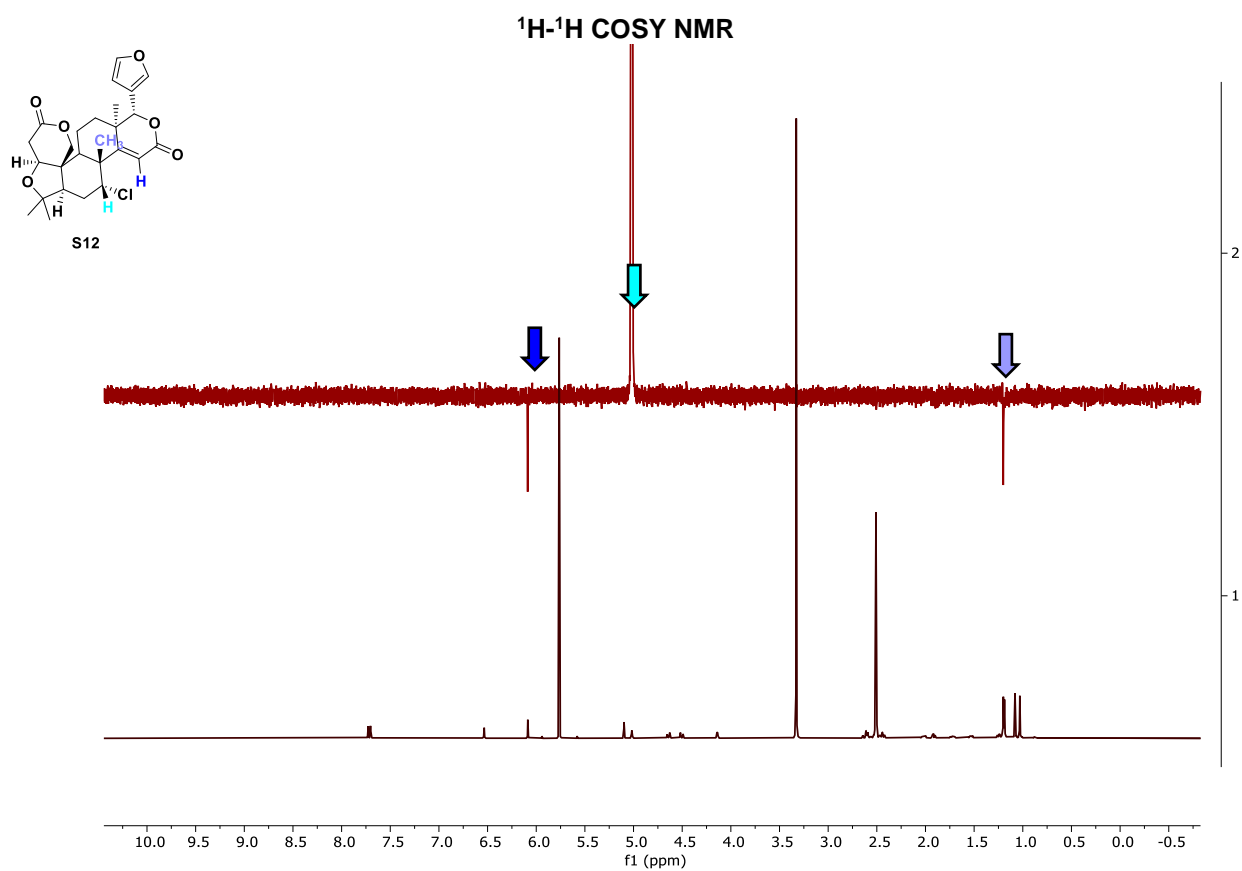

## SUPPORTING INFORMATION

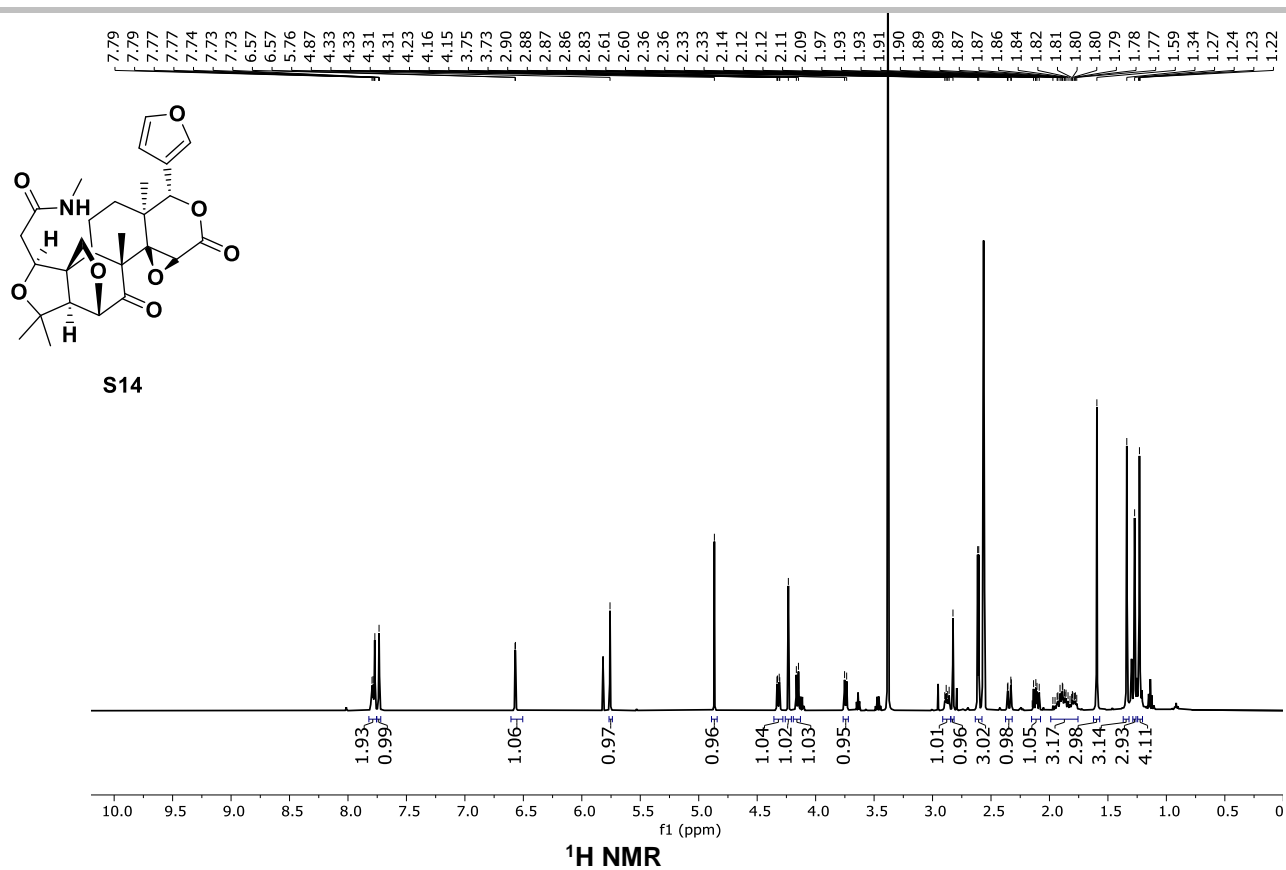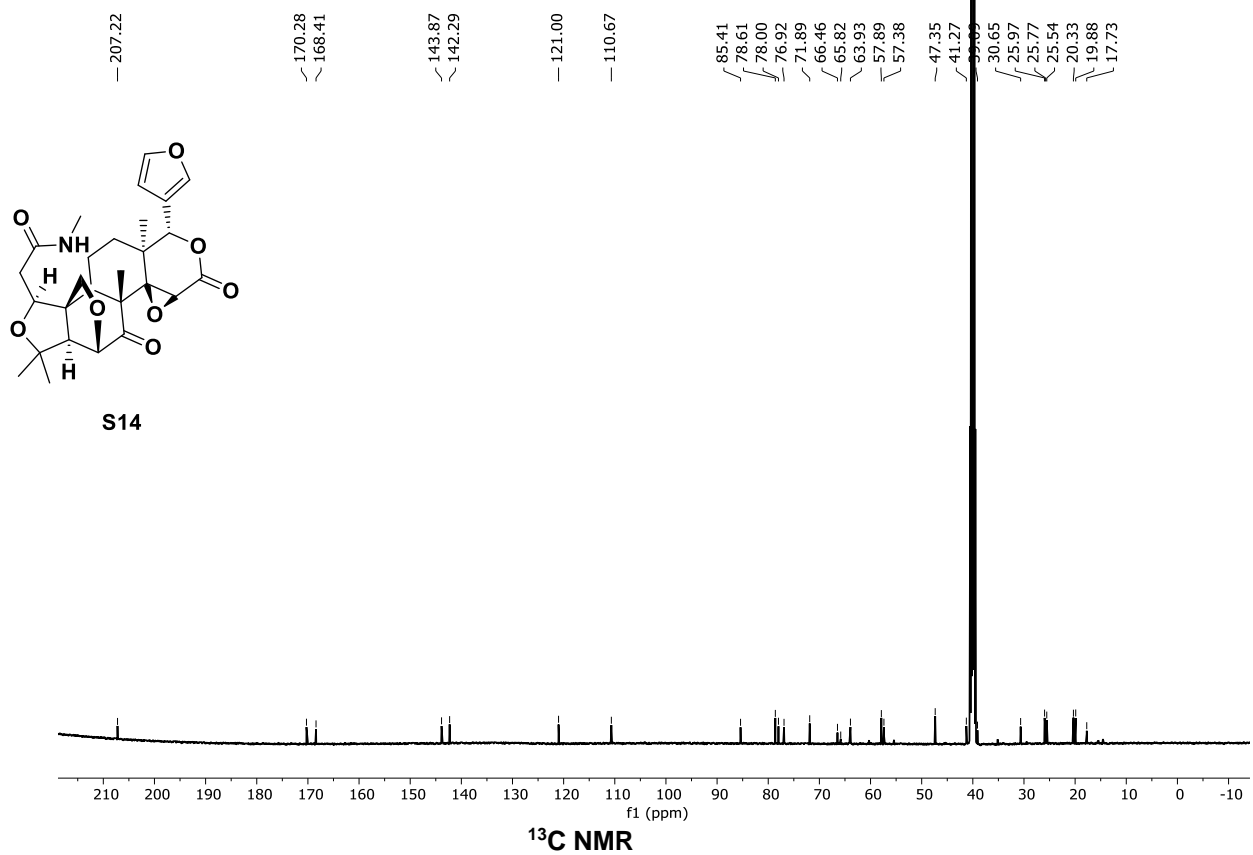



## SUPPORTING INFORMATION

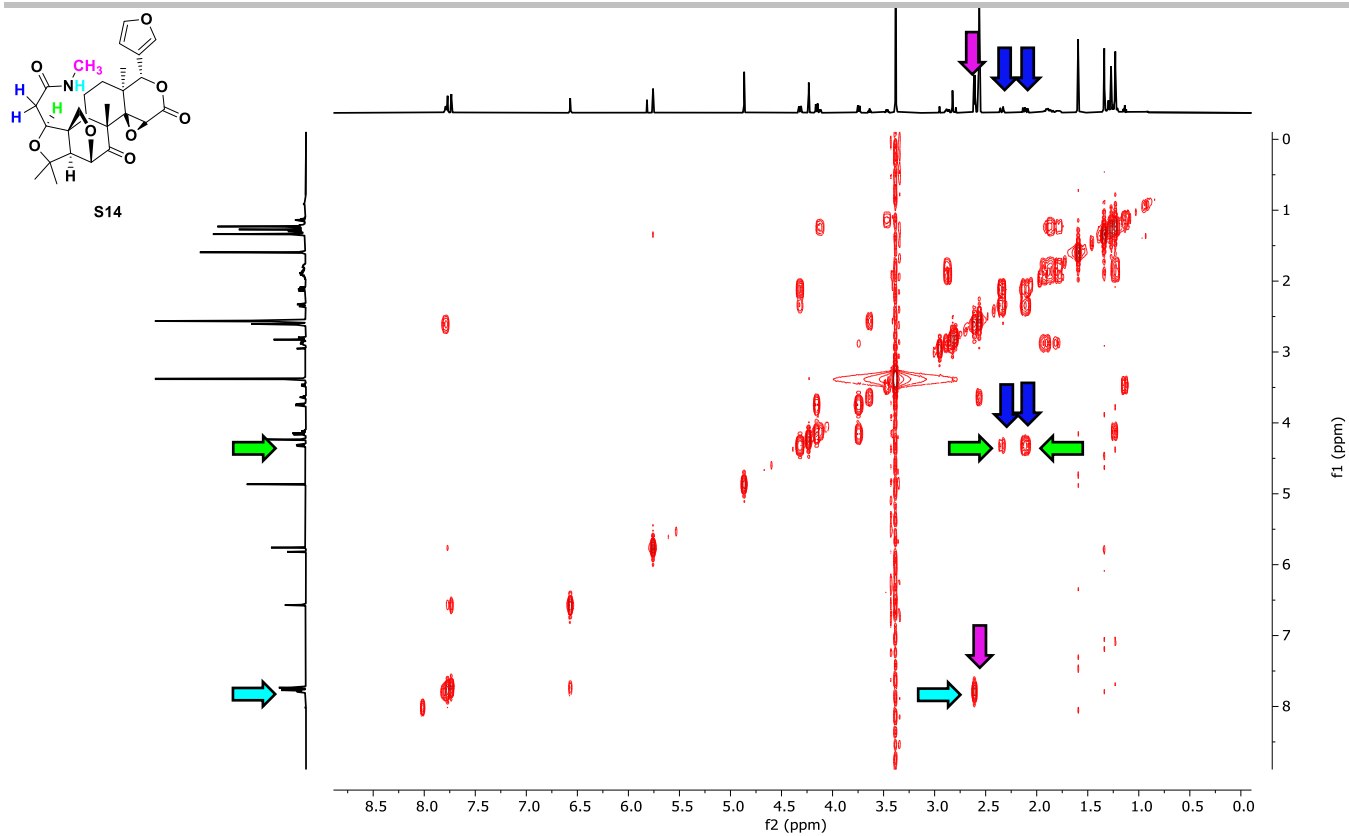 $^1\text{H}$ - $^1\text{H}$  COSY NMR

## SUPPORTING INFORMATION

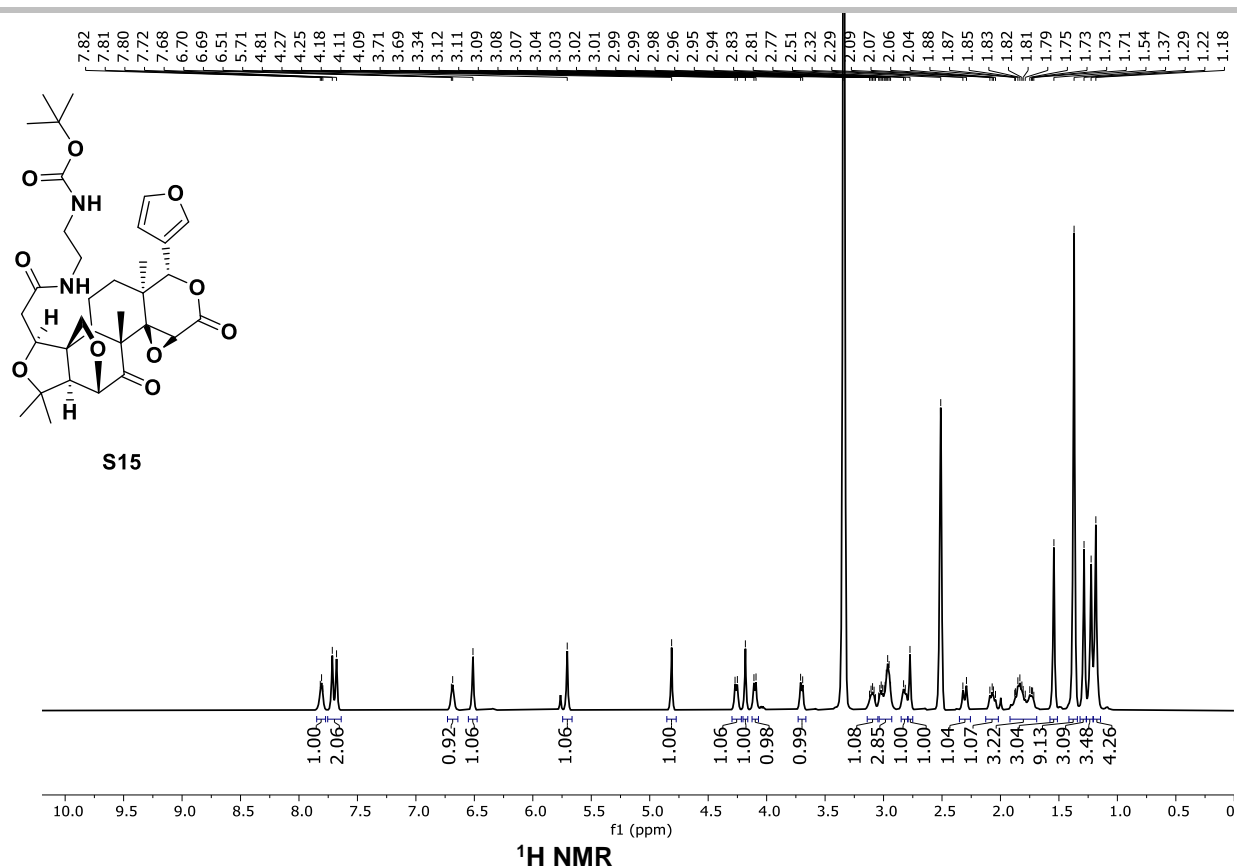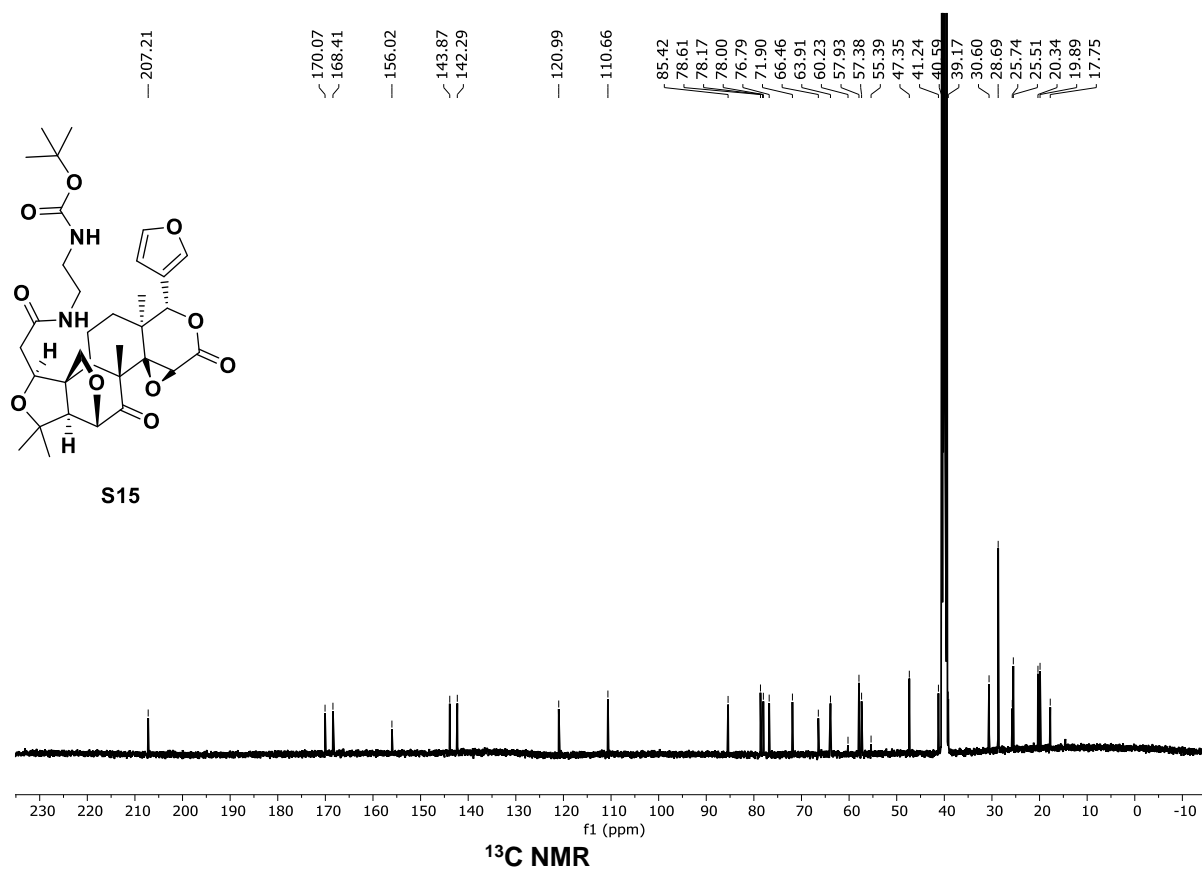

## SUPPORTING INFORMATION

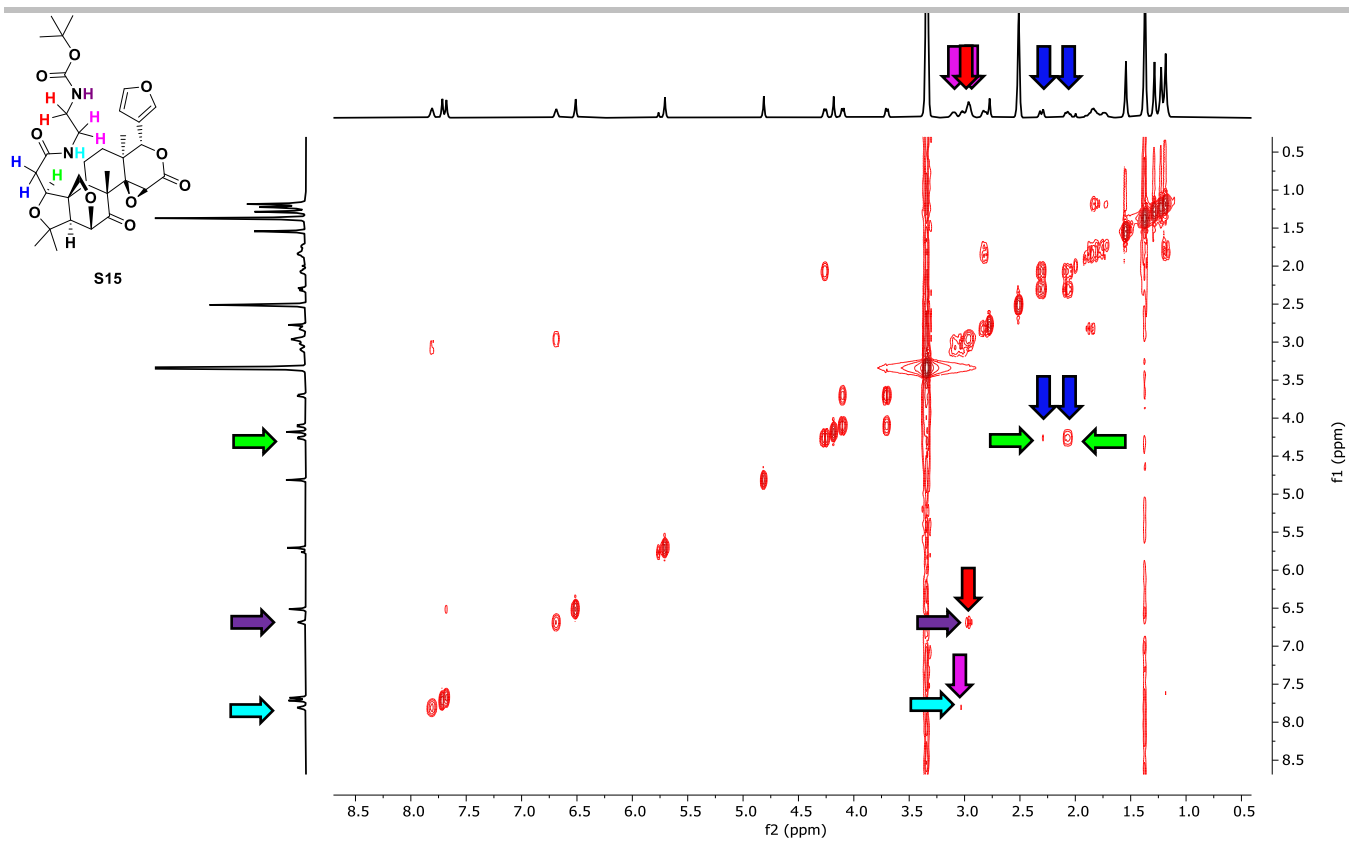 $^1\text{H}$ - $^1\text{H}$  COSY NMR

## SUPPORTING INFORMATION

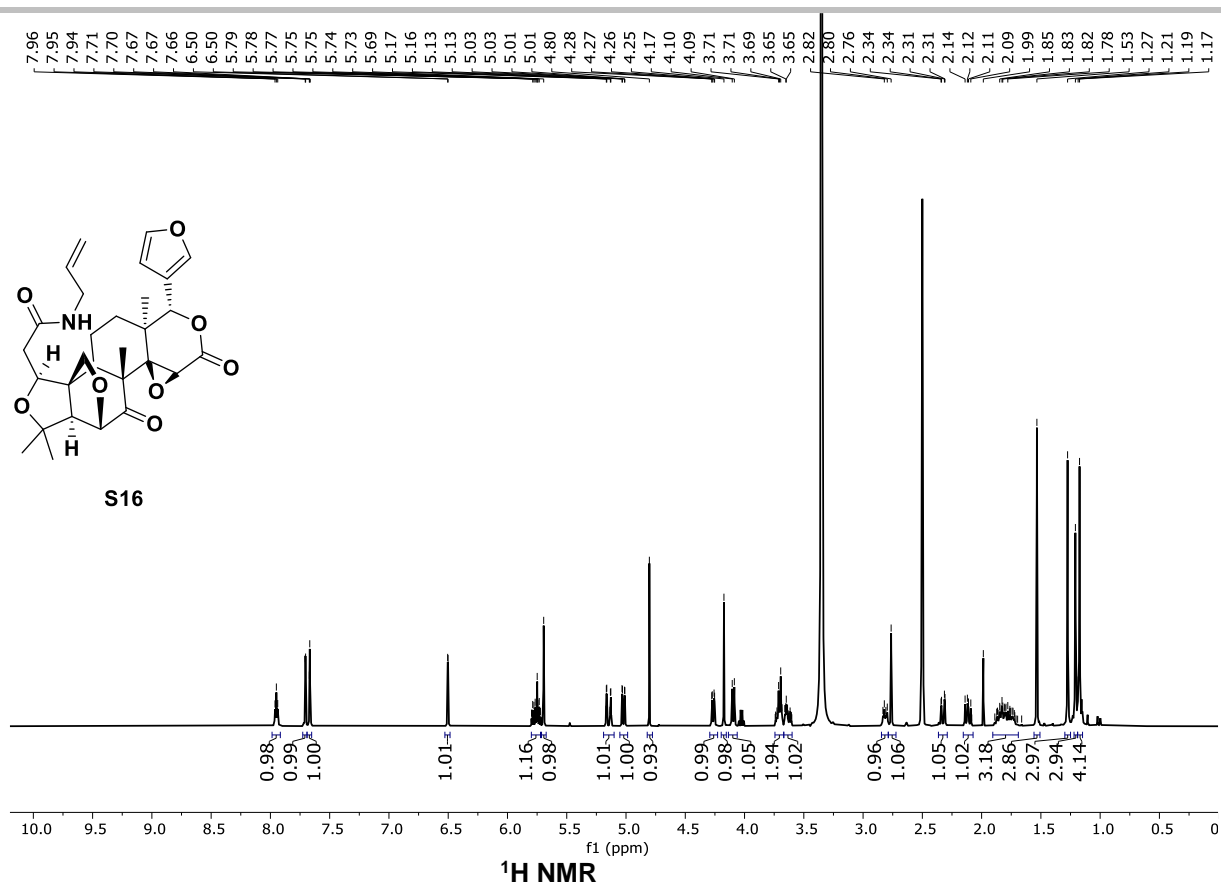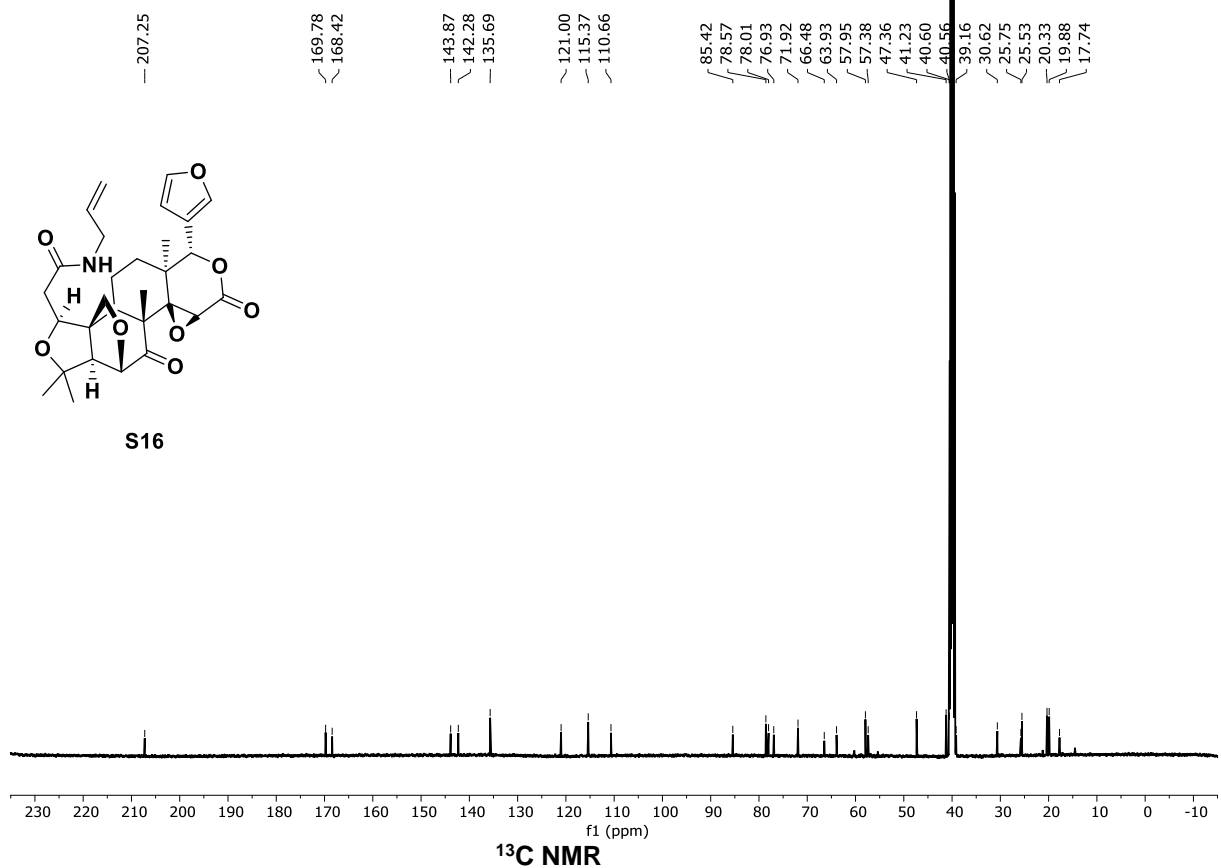

## SUPPORTING INFORMATION

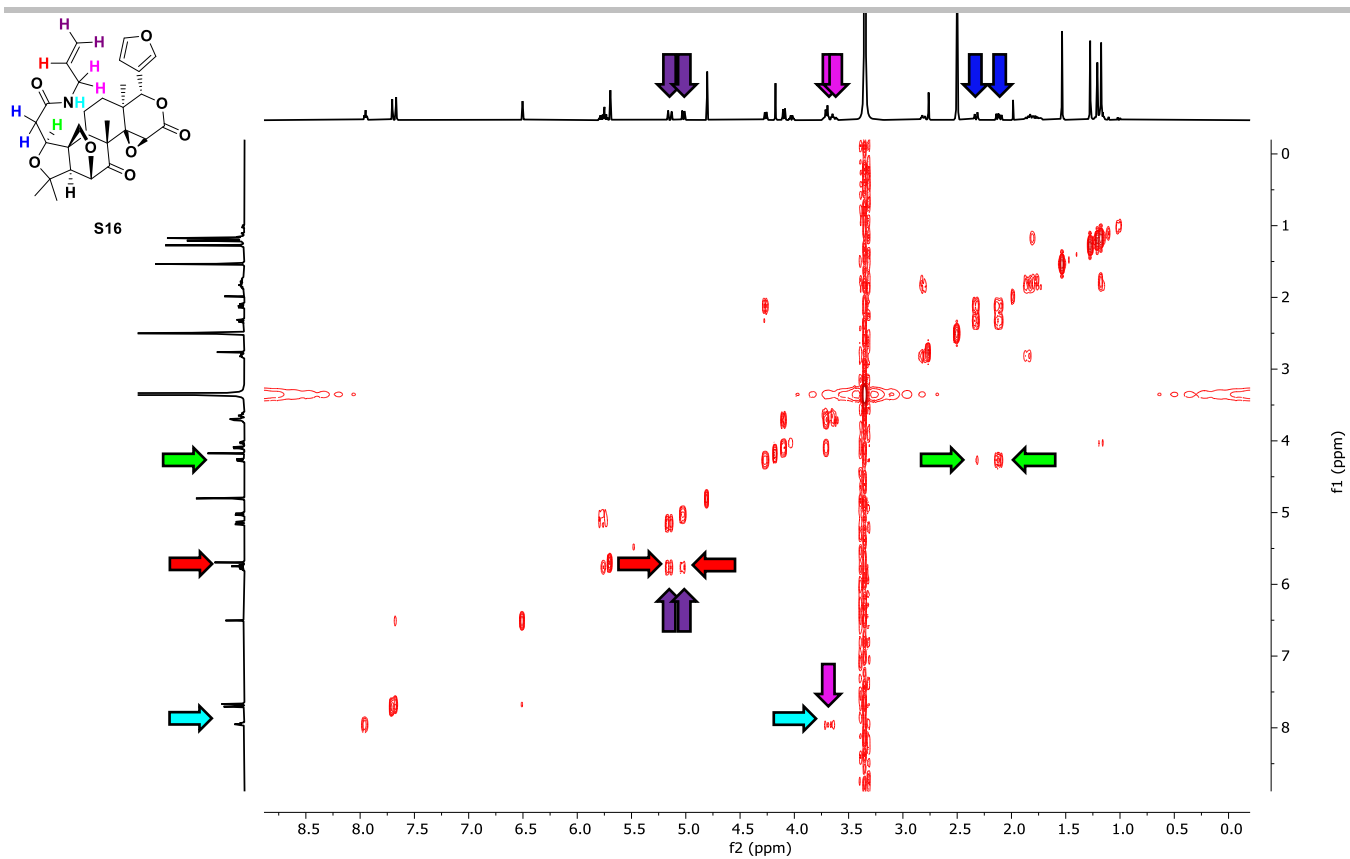



## SUPPORTING INFORMATION

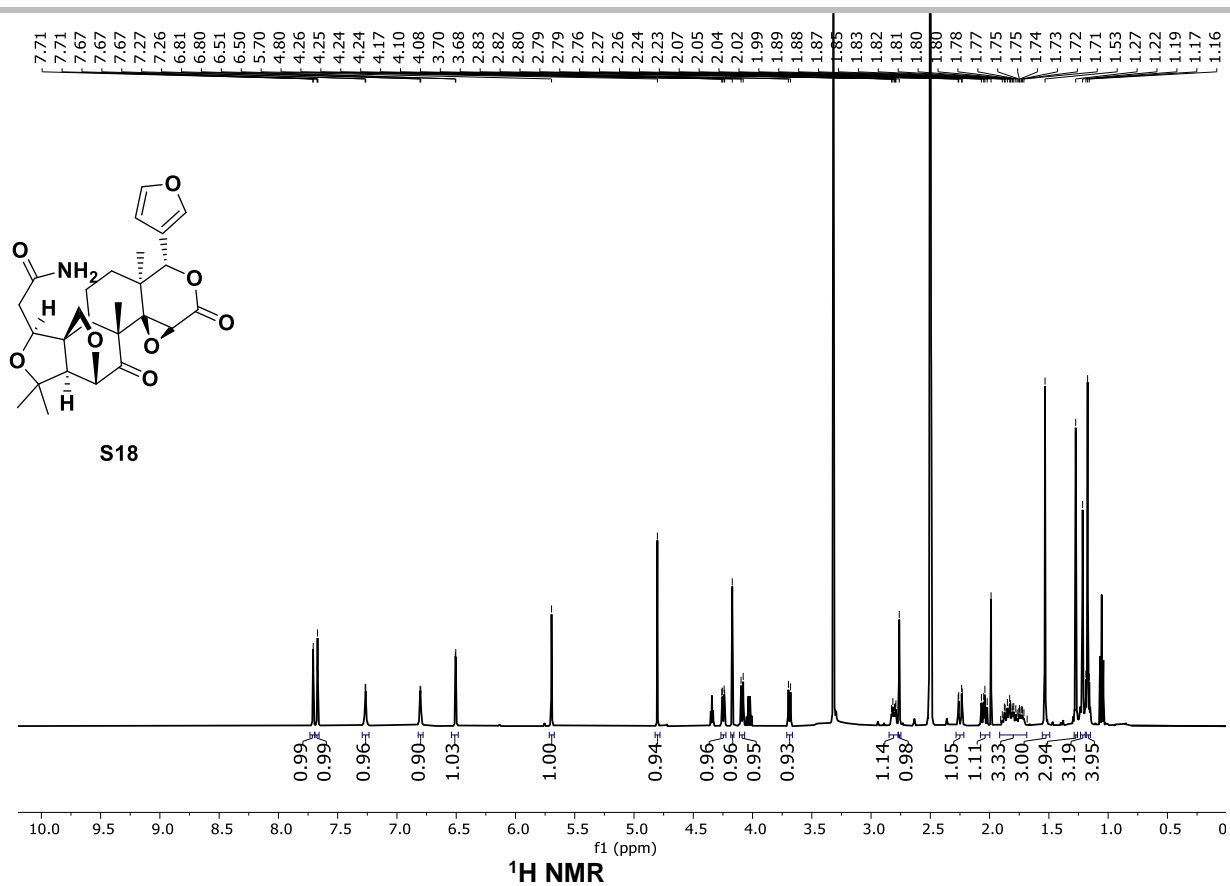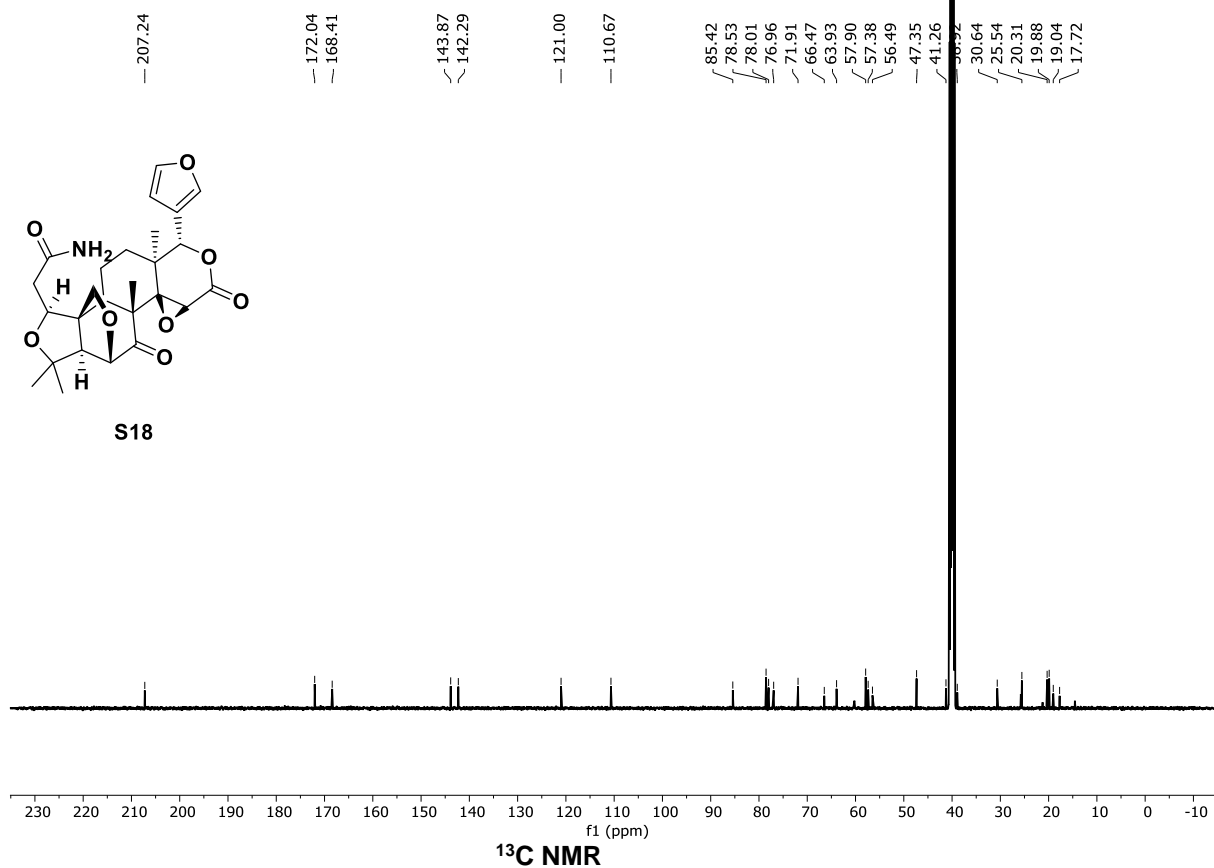

## SUPPORTING INFORMATION

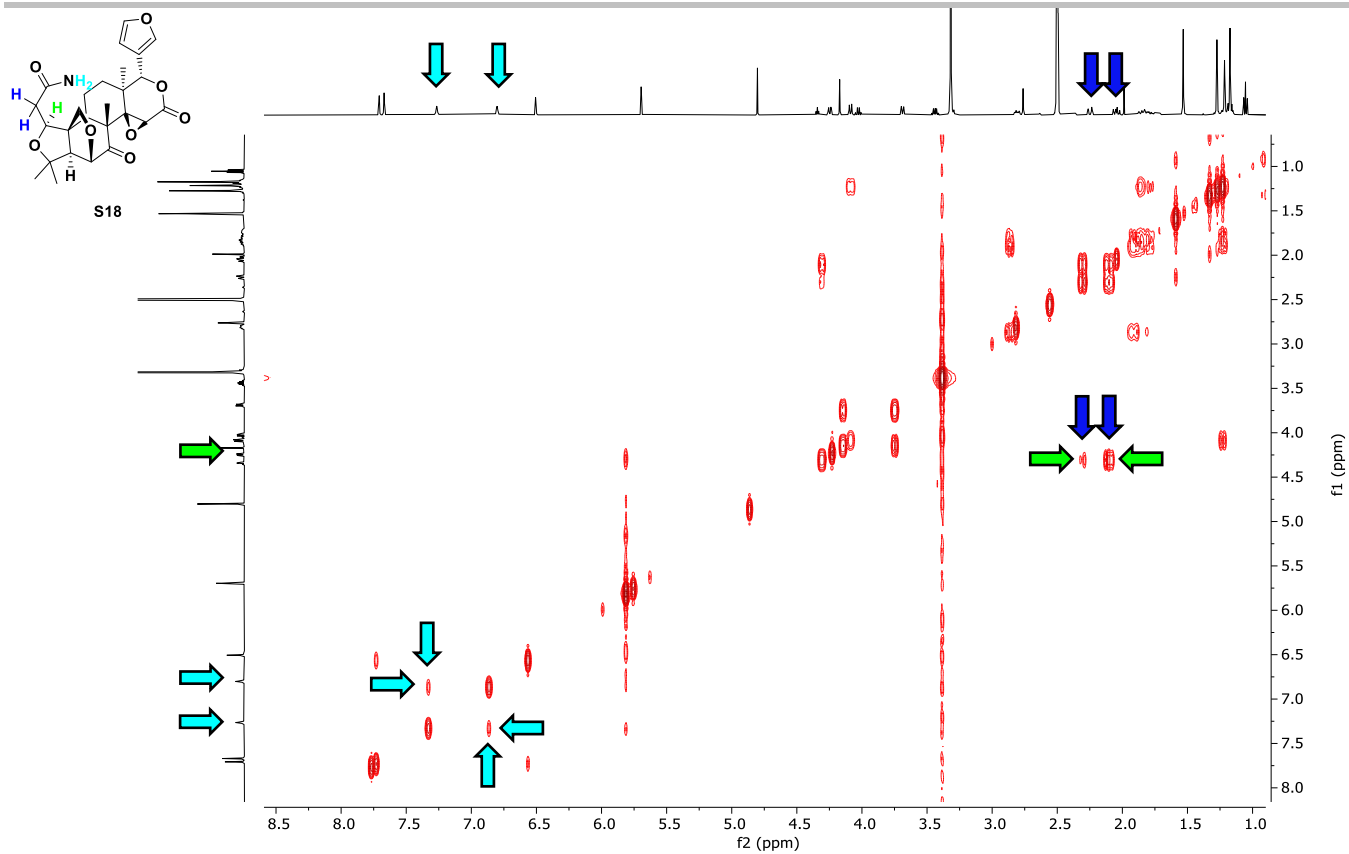 $^1\text{H}$ - $^1\text{H}$  COSY NMR



## SUPPORTING INFORMATION

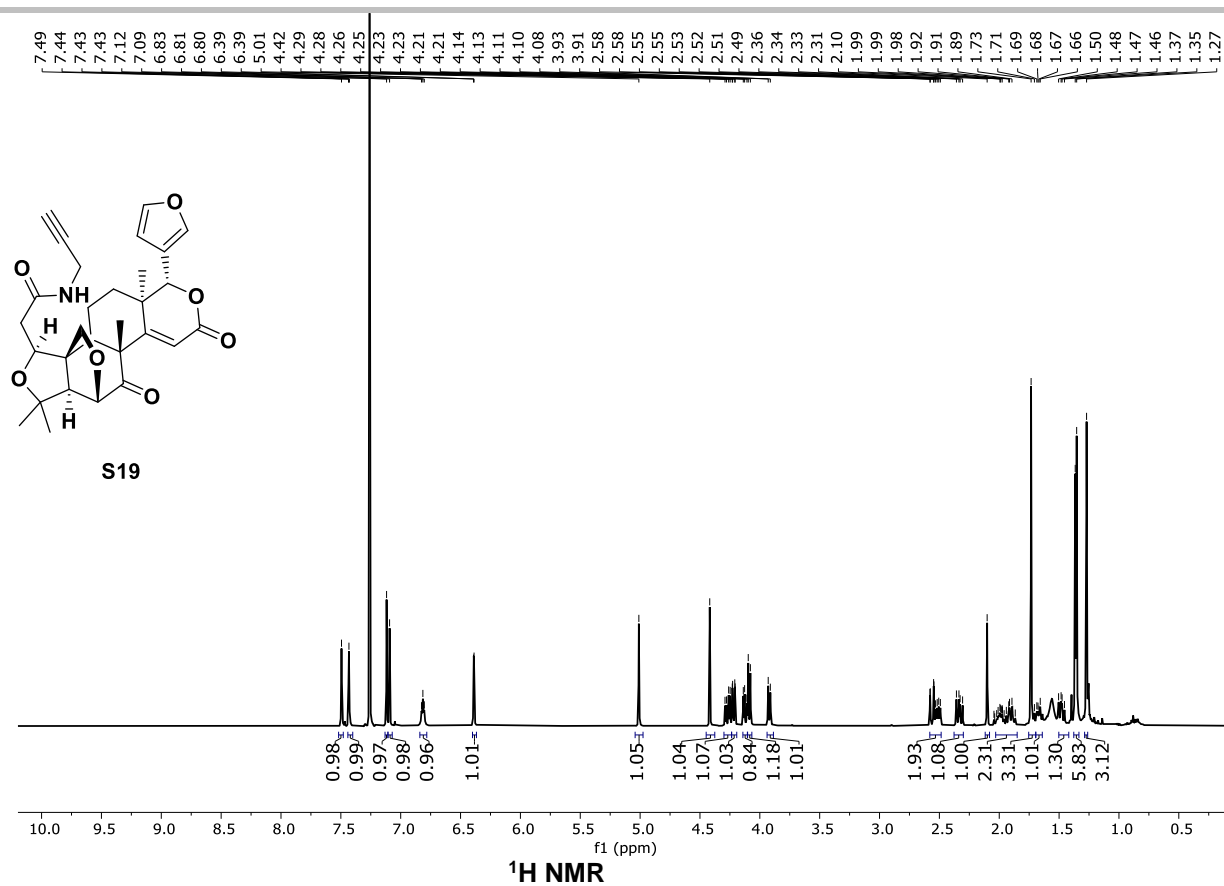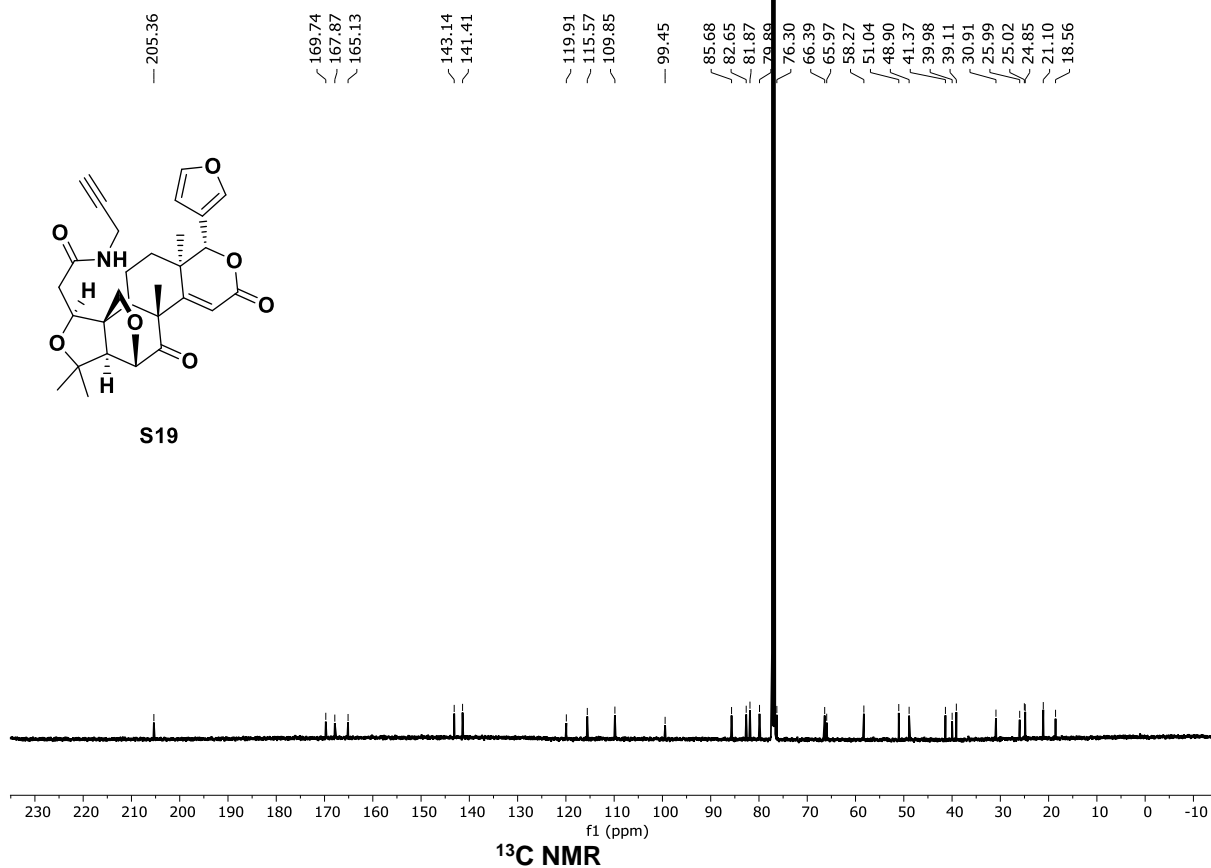

## SUPPORTING INFORMATION

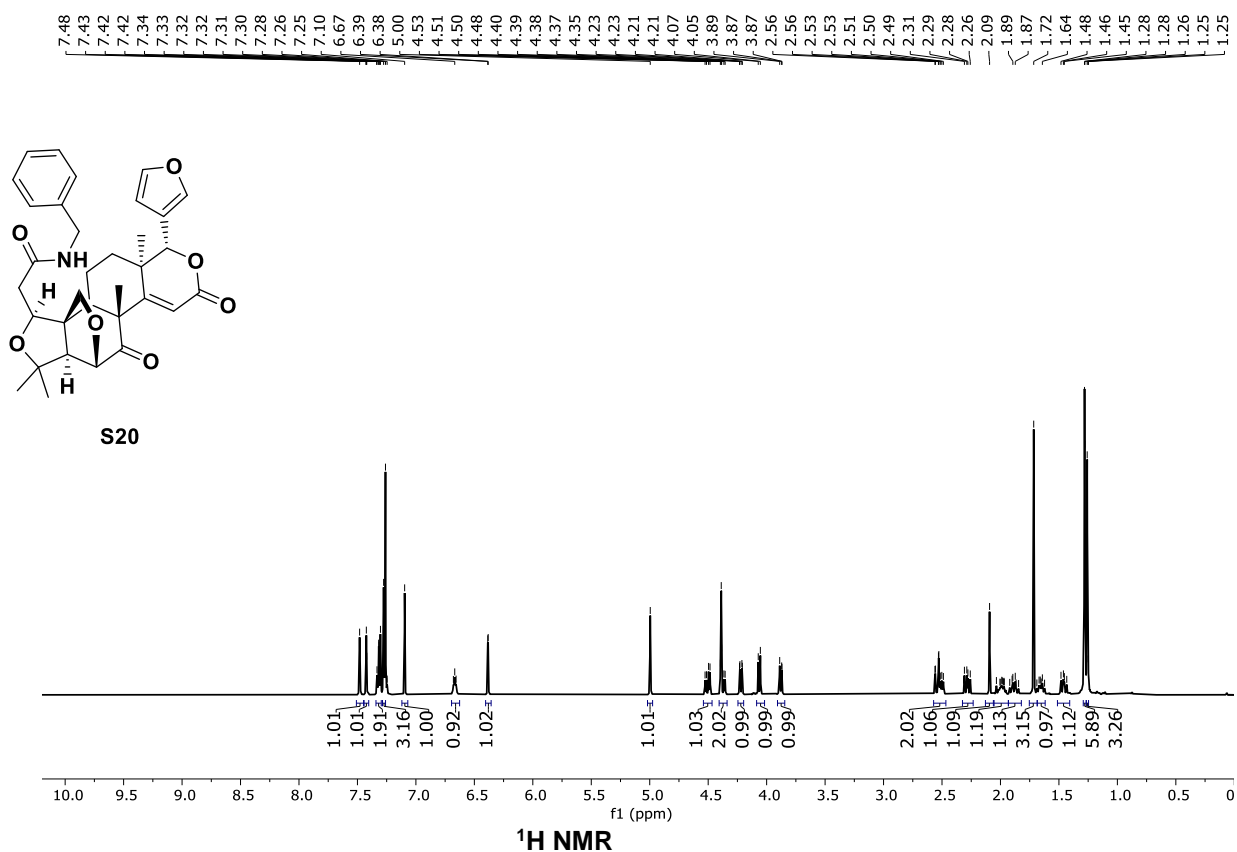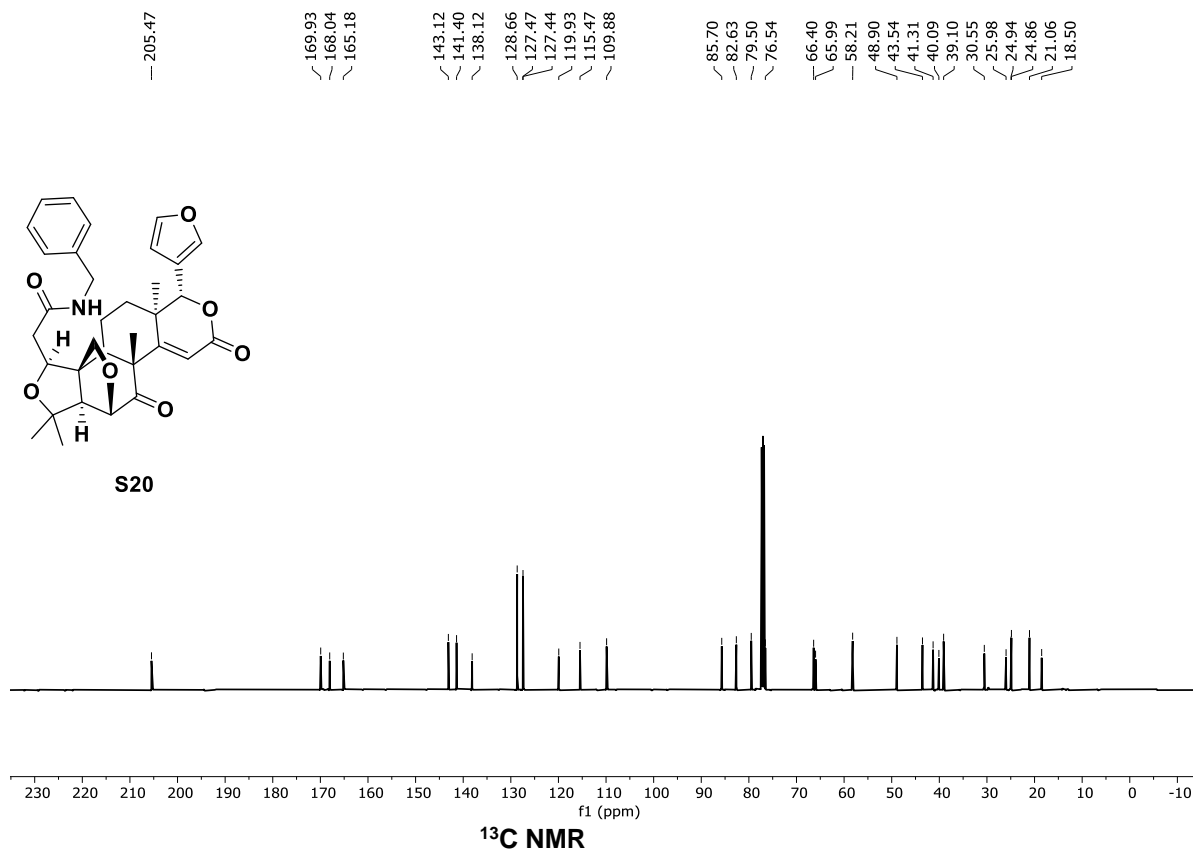

## SUPPORTING INFORMATION

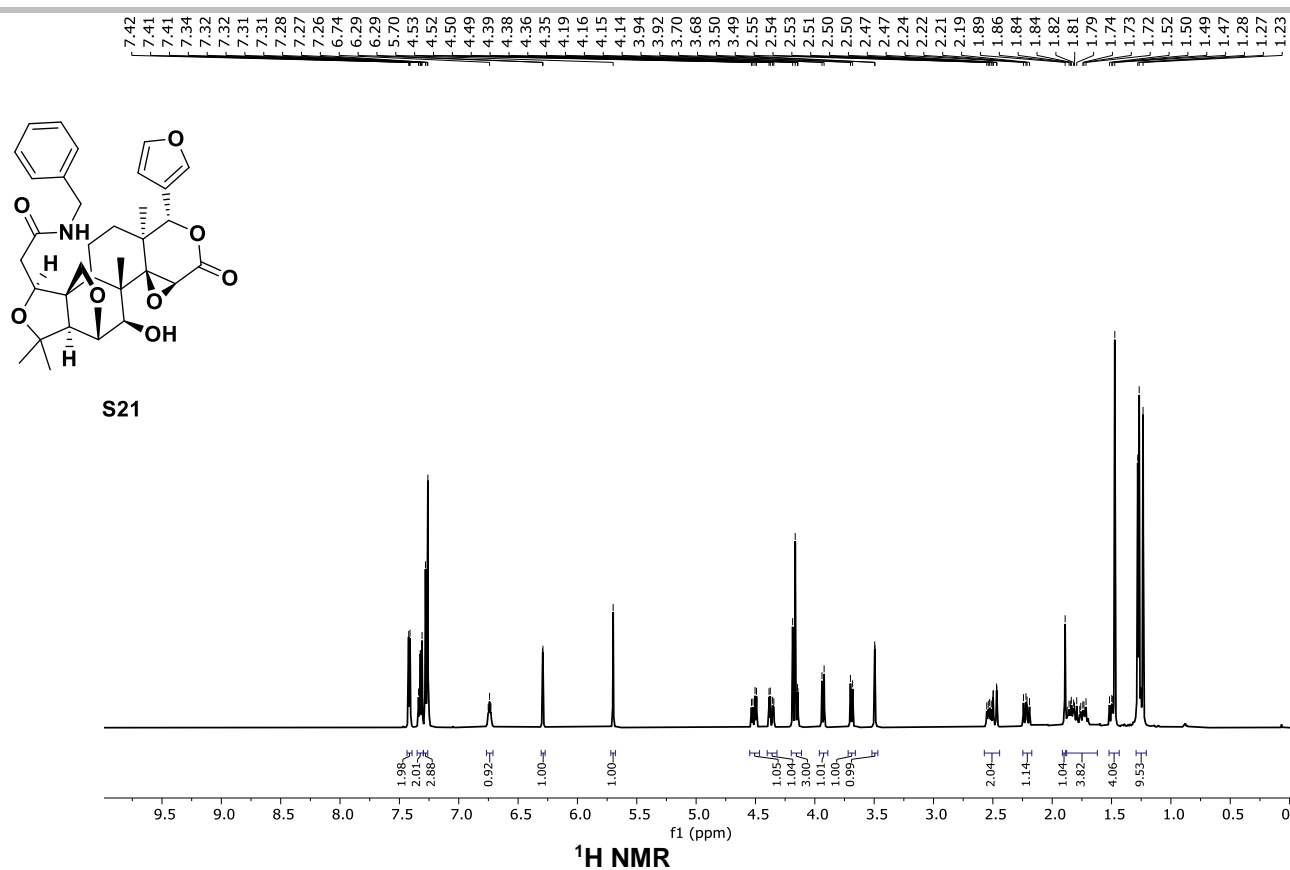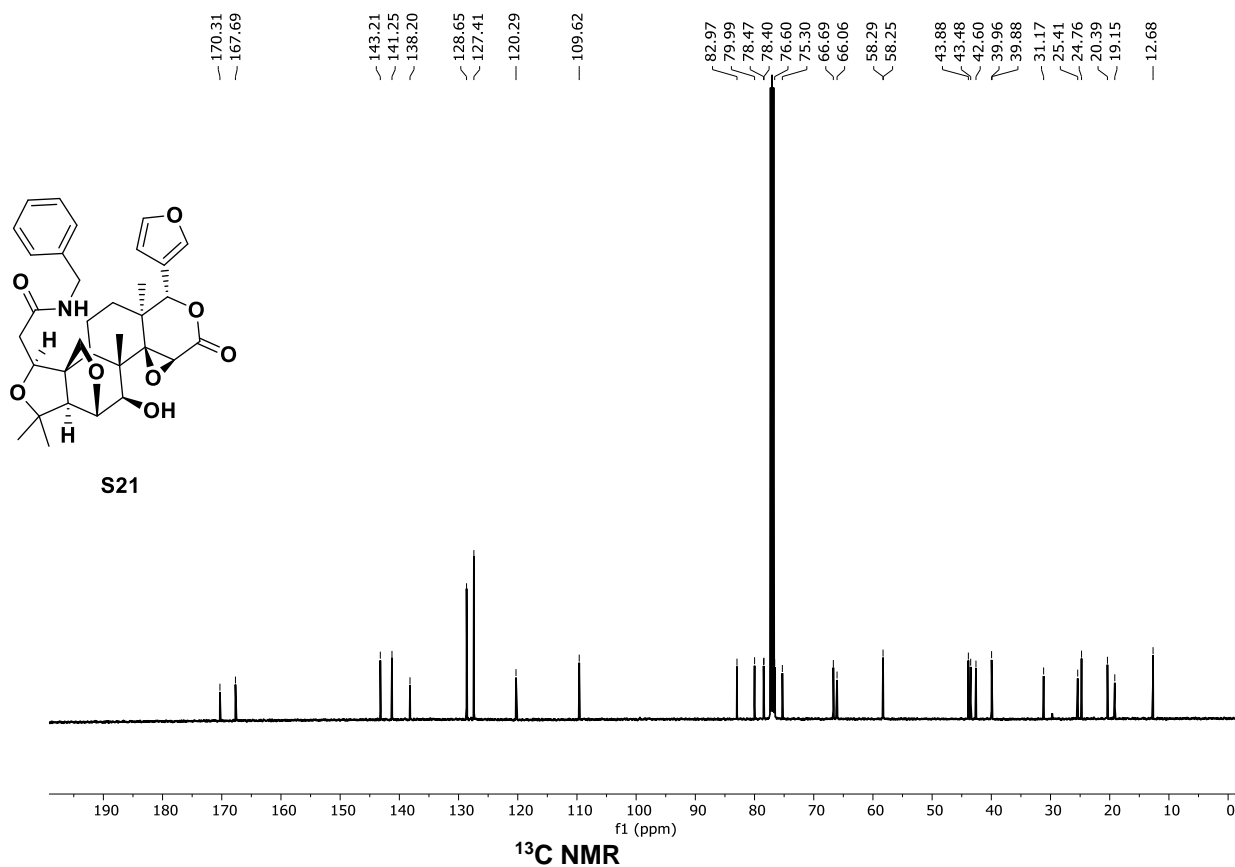

## SUPPORTING INFORMATION

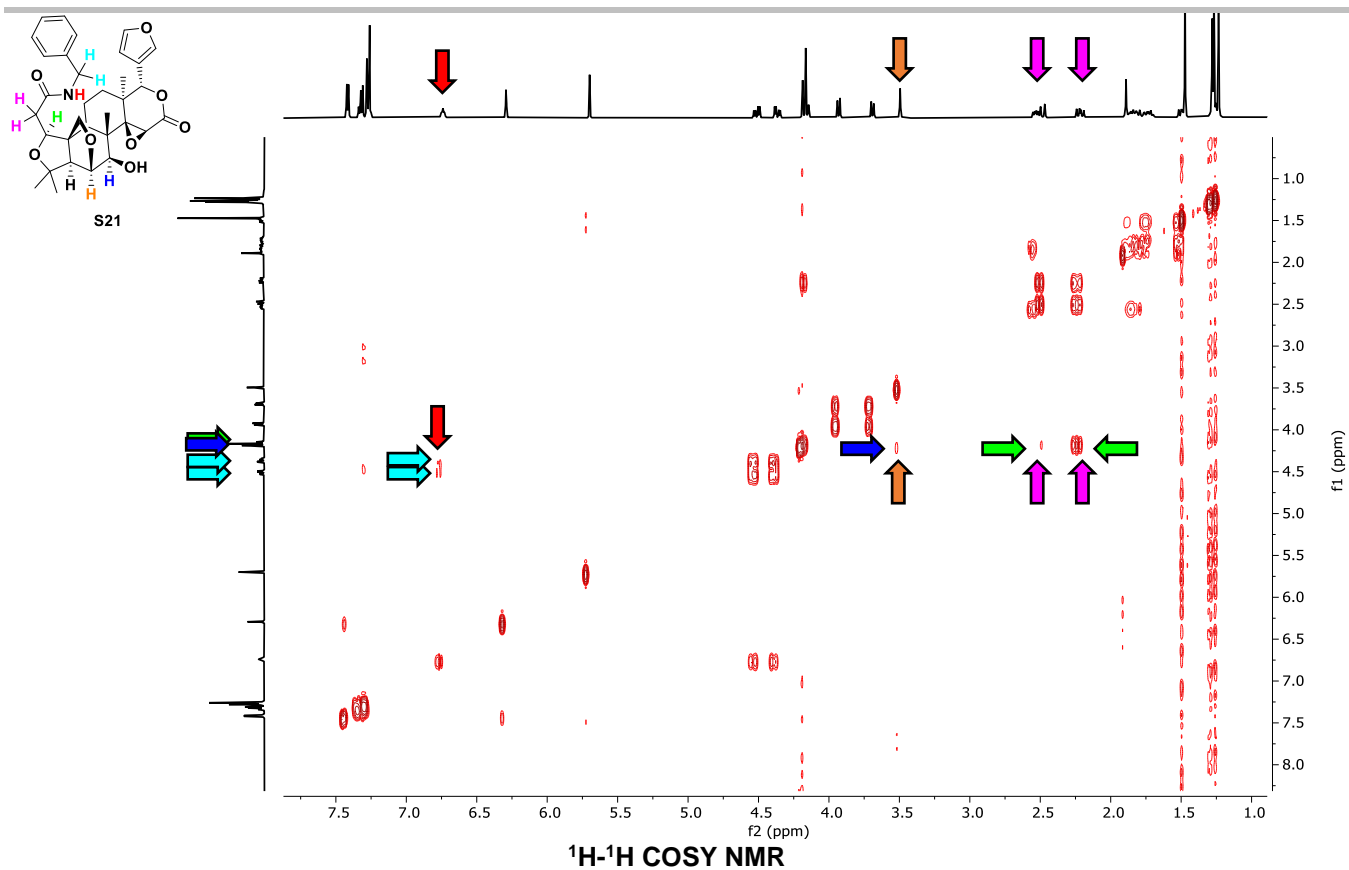

## SUPPORTING INFORMATION

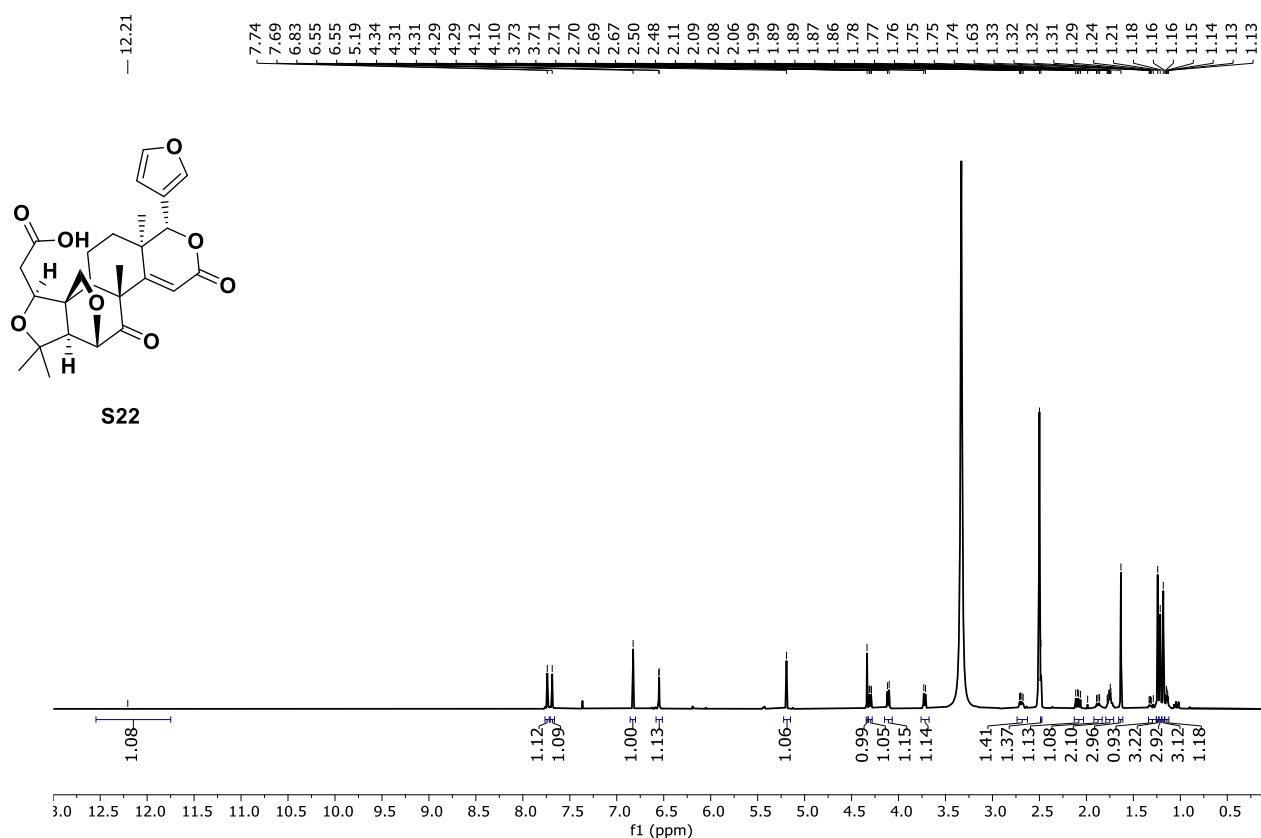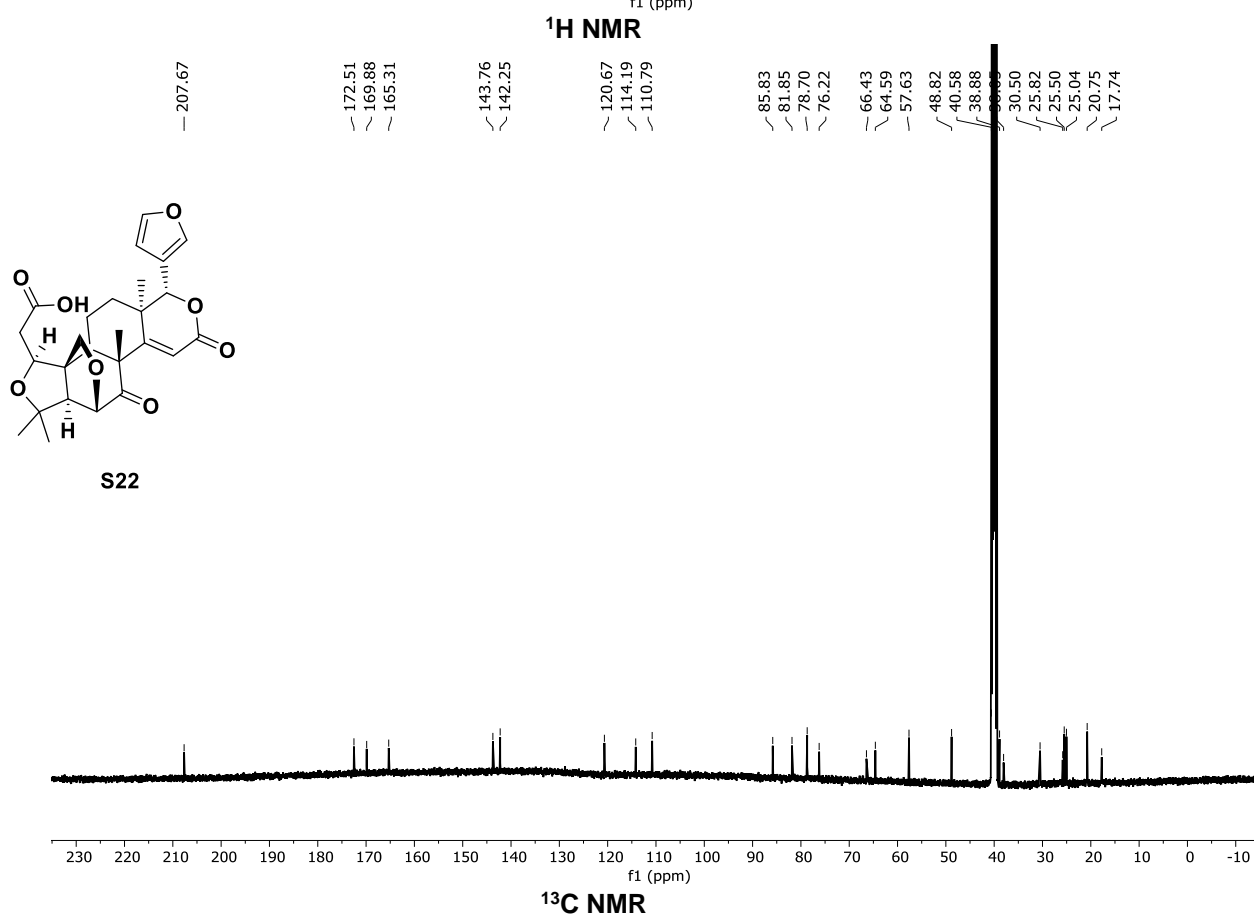

## SUPPORTING INFORMATION

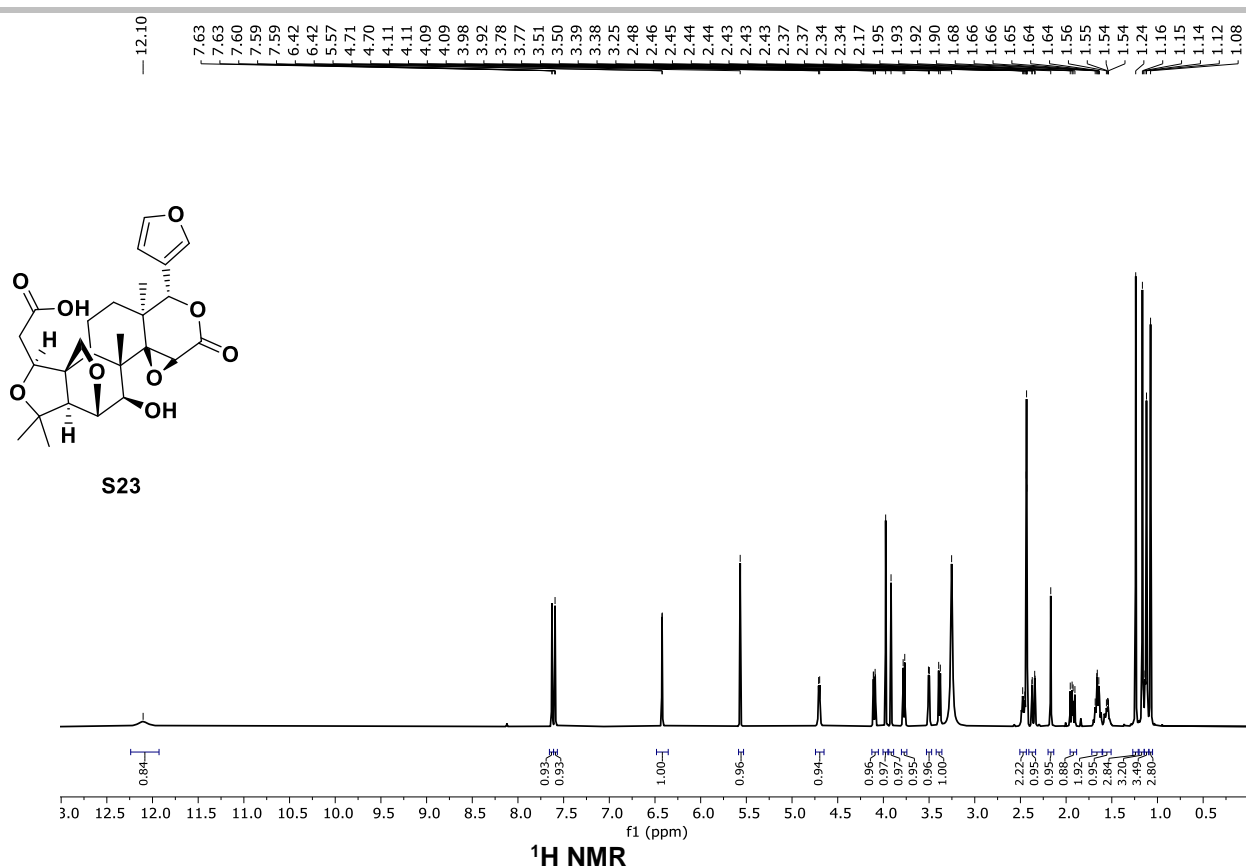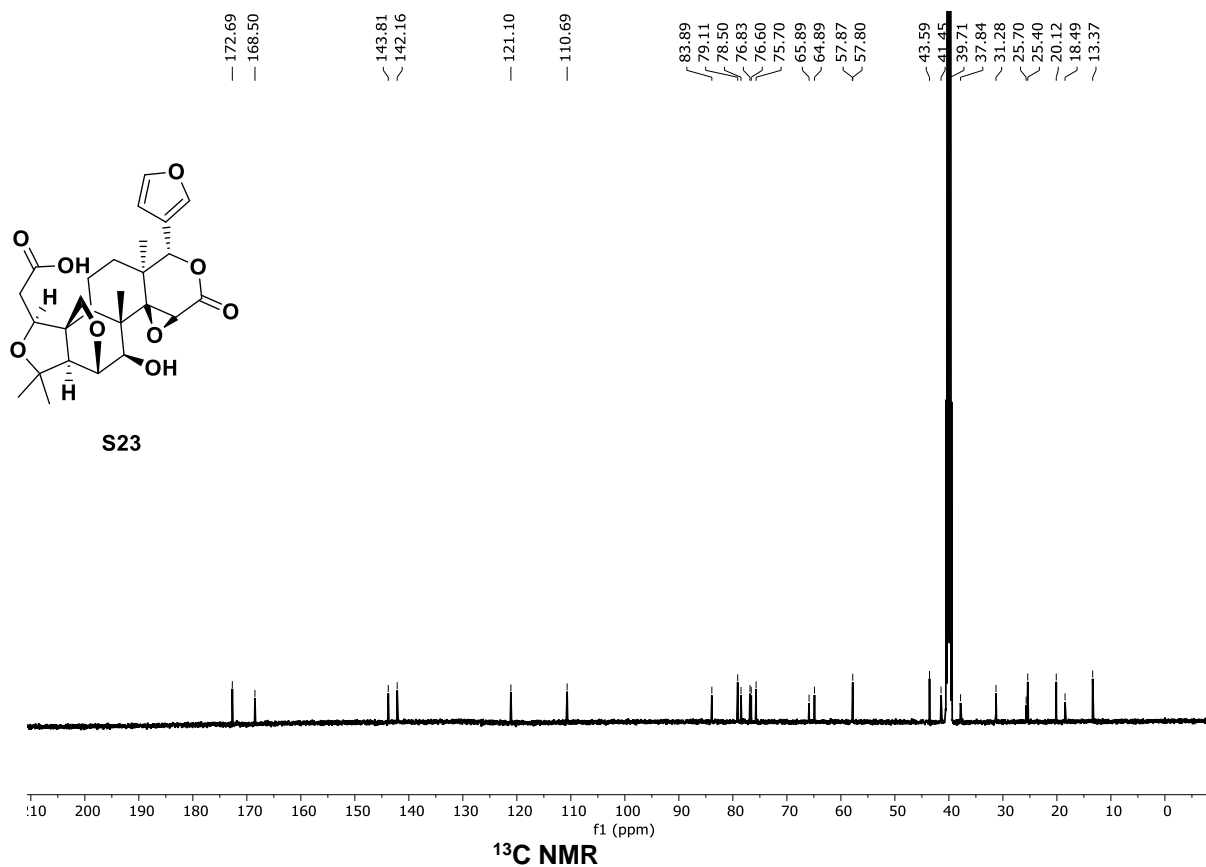

## SUPPORTING INFORMATION

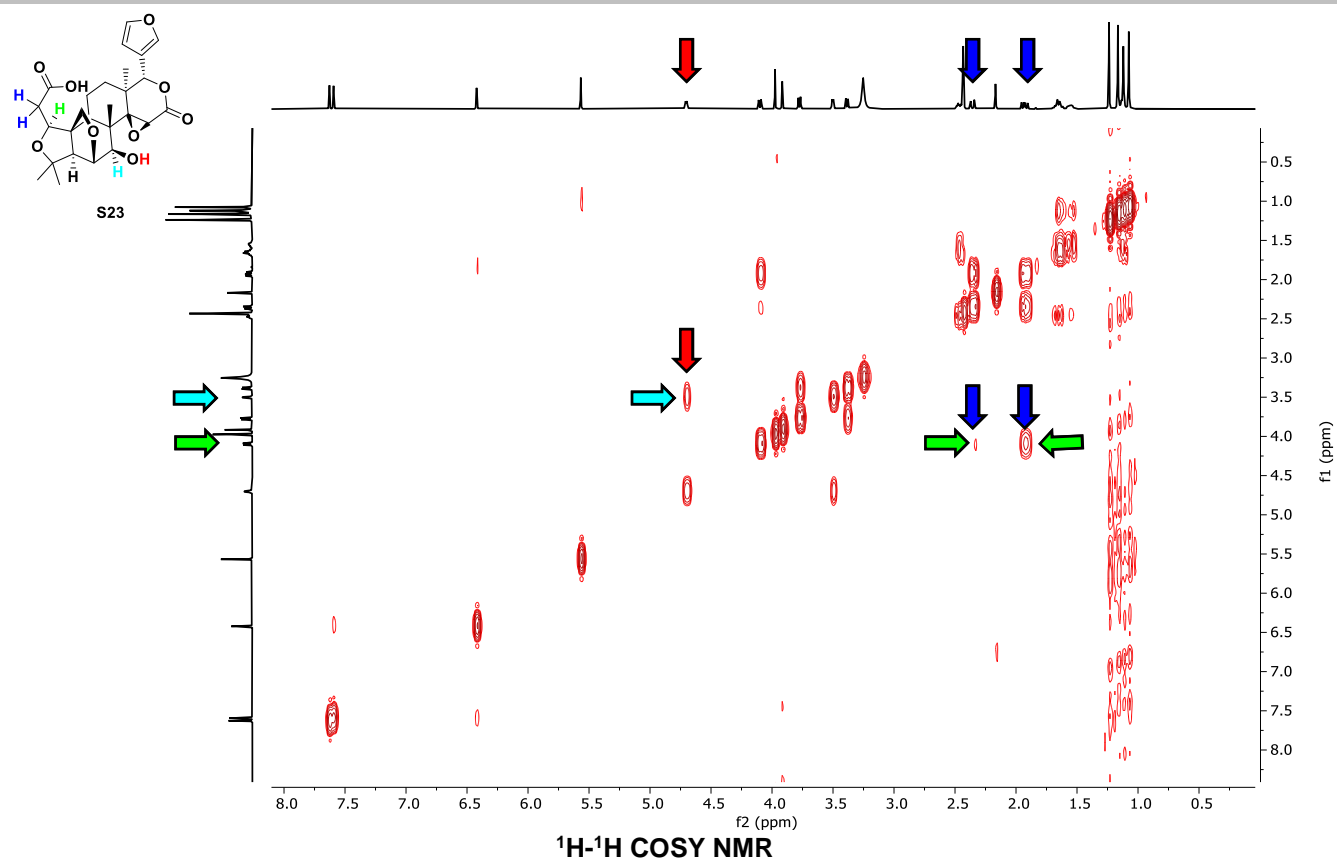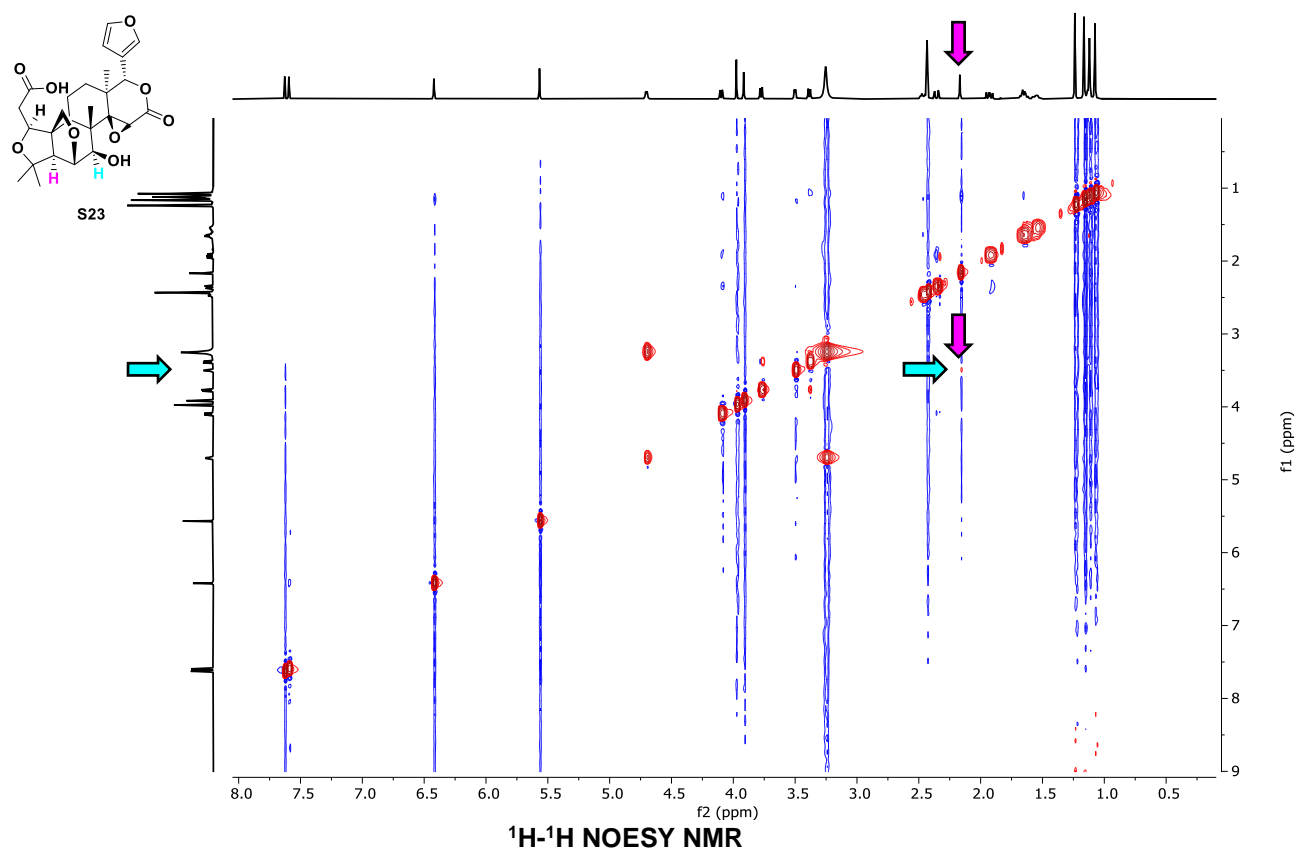

## SUPPORTING INFORMATION

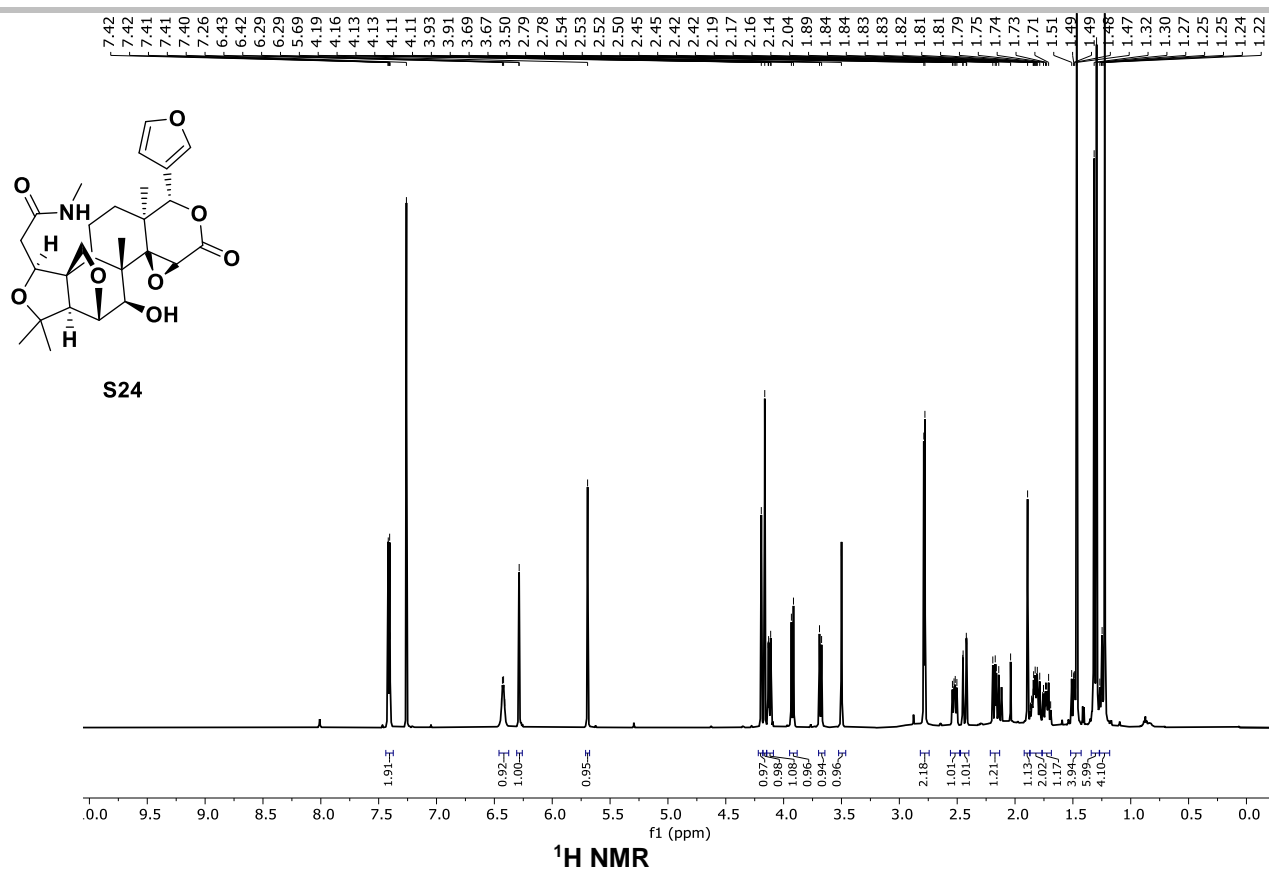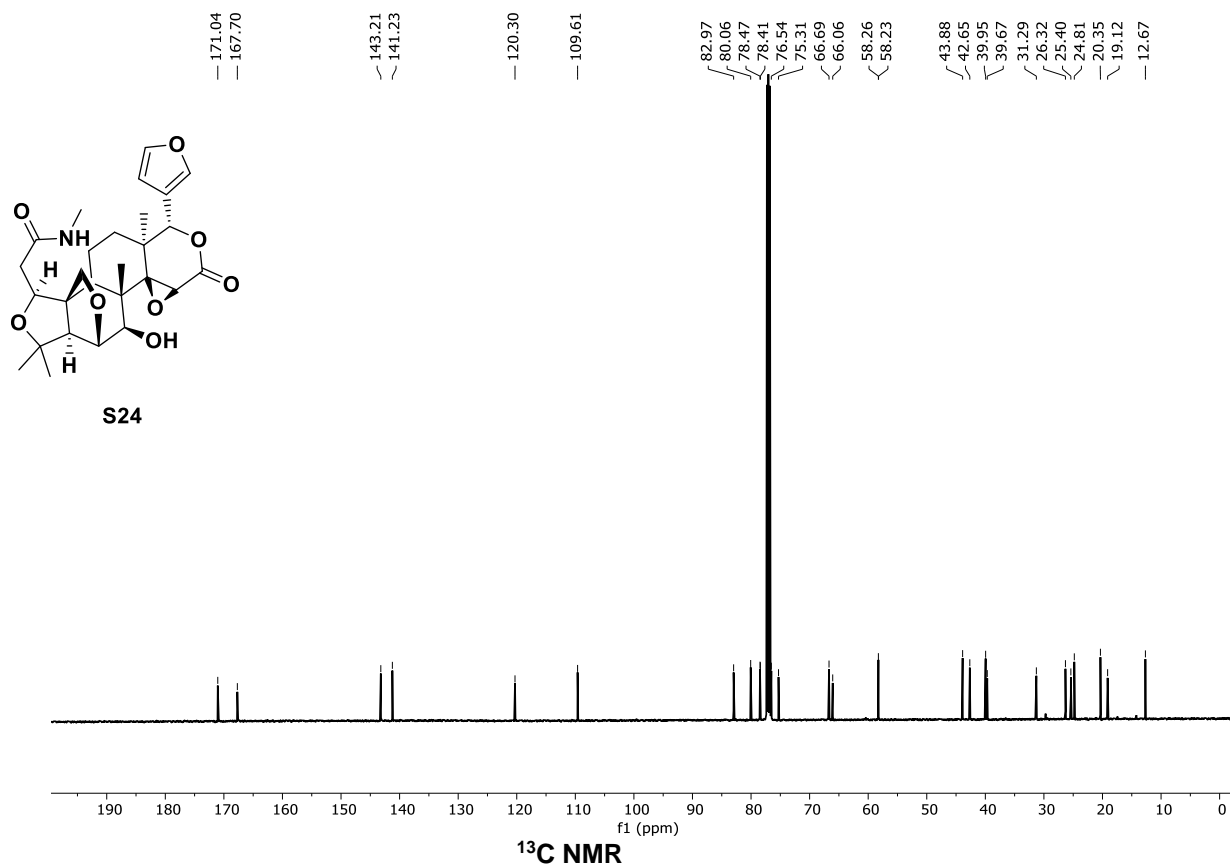



## SUPPORTING INFORMATION

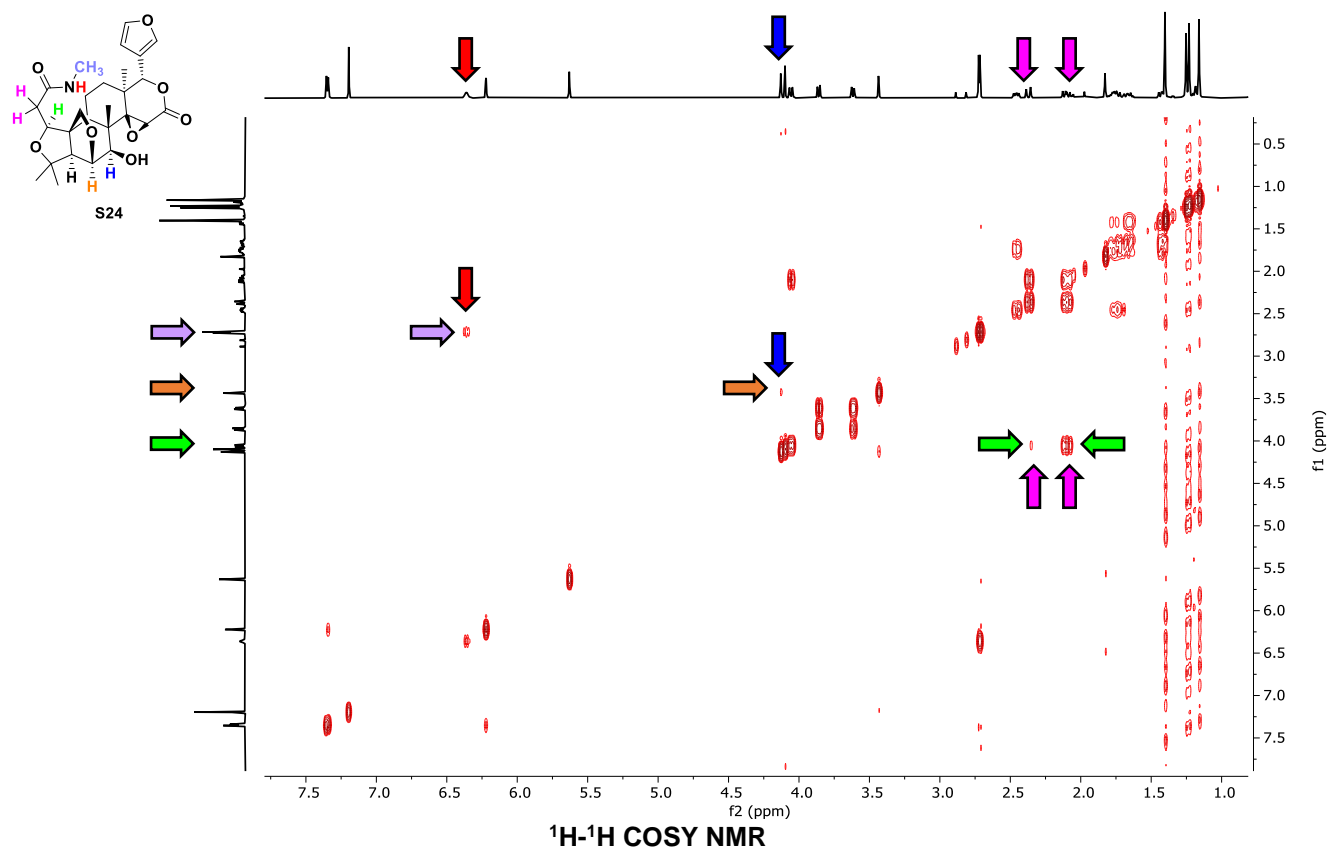

## SUPPORTING INFORMATION

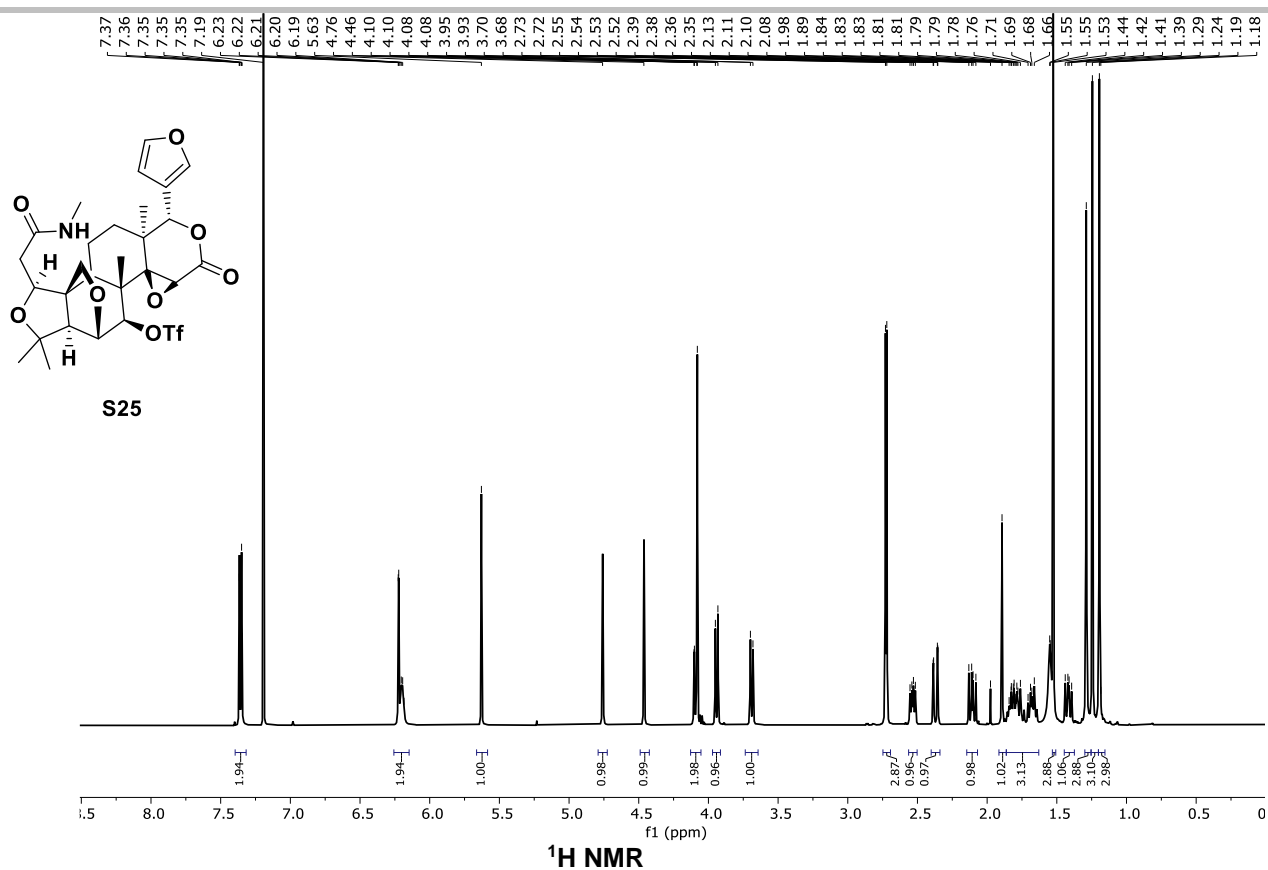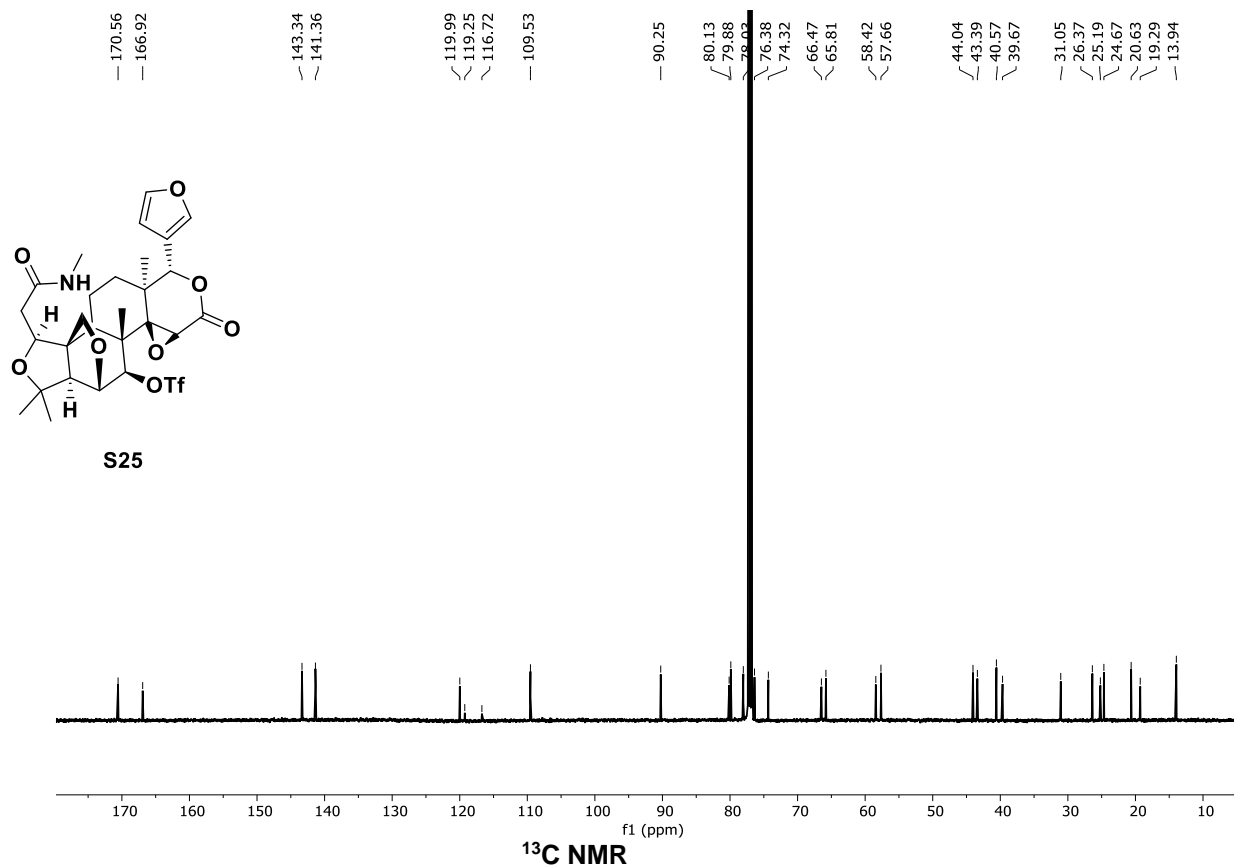

## SUPPORTING INFORMATION

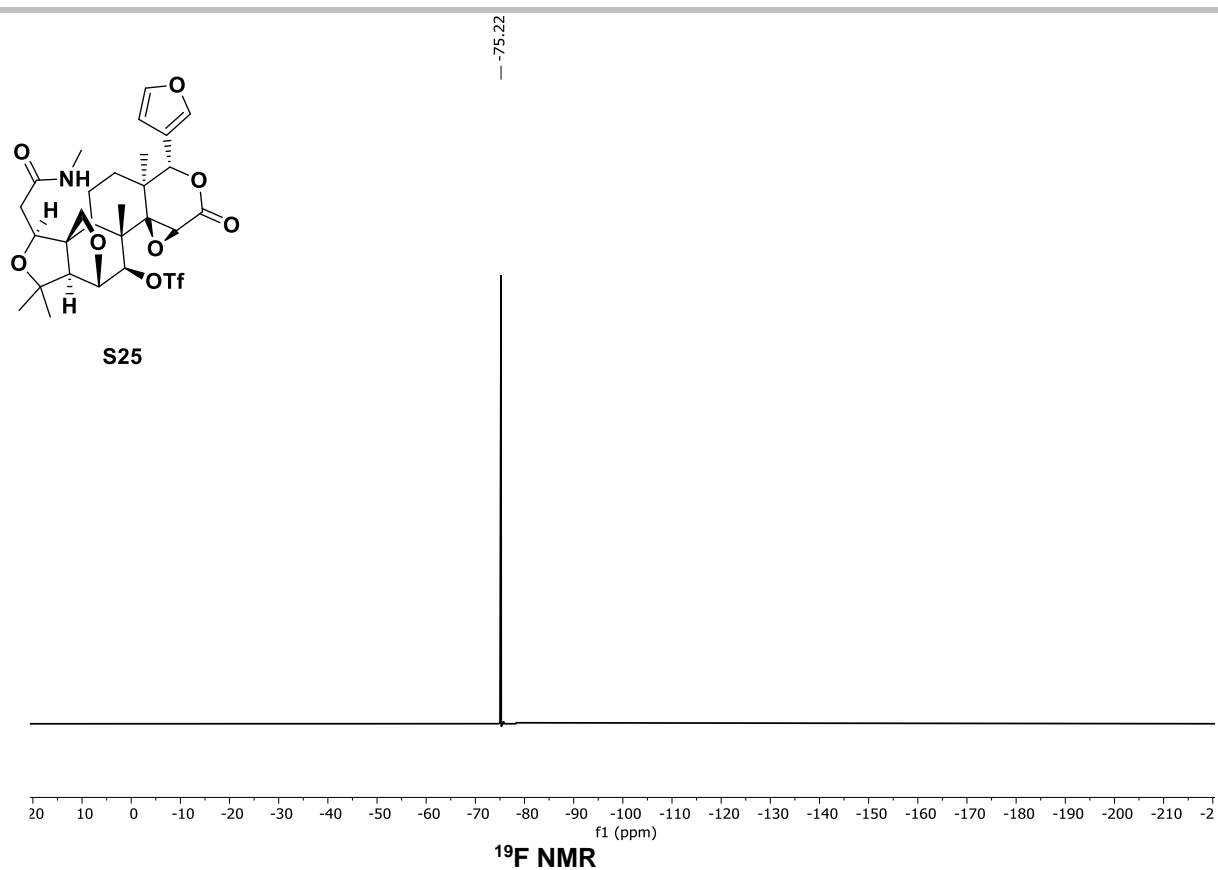

## SUPPORTING INFORMATION

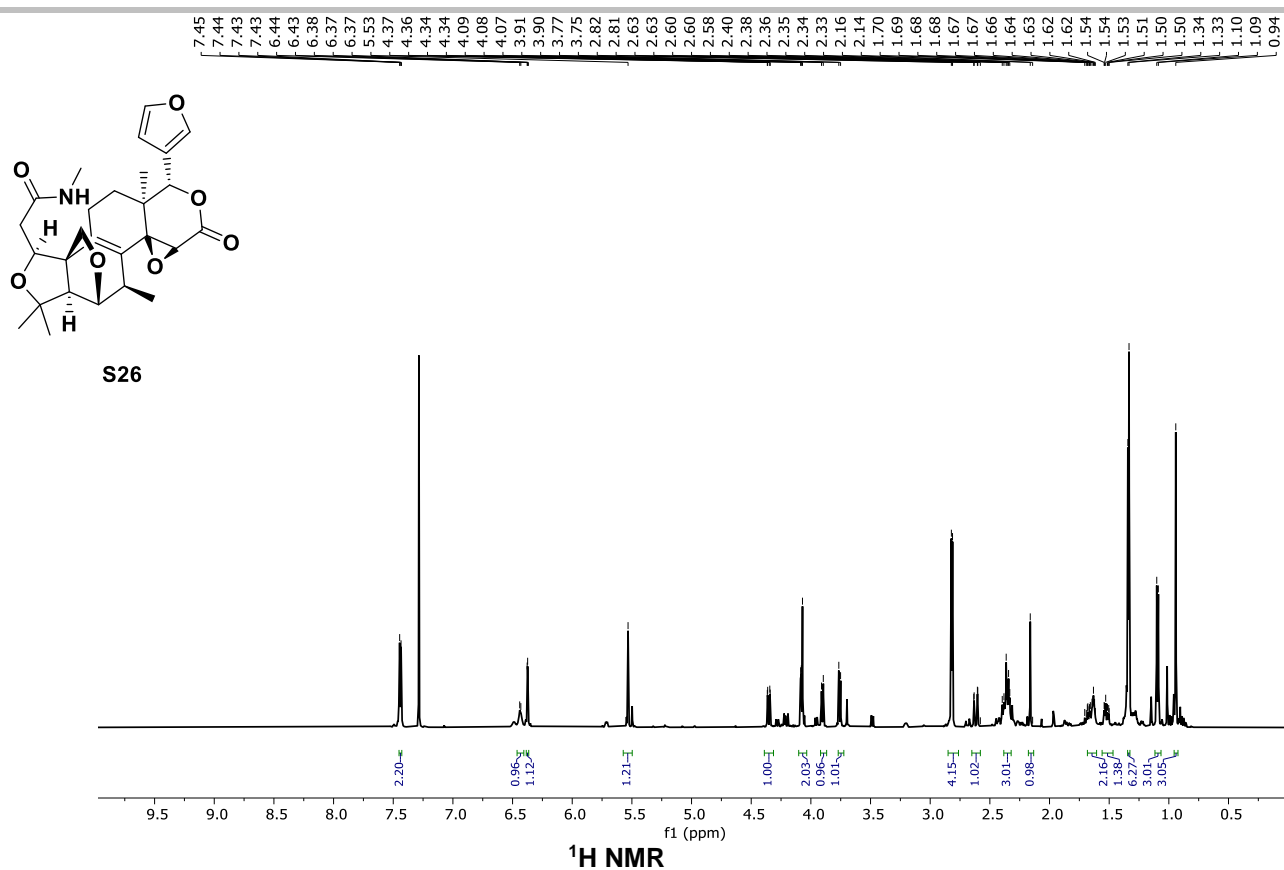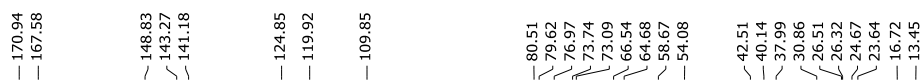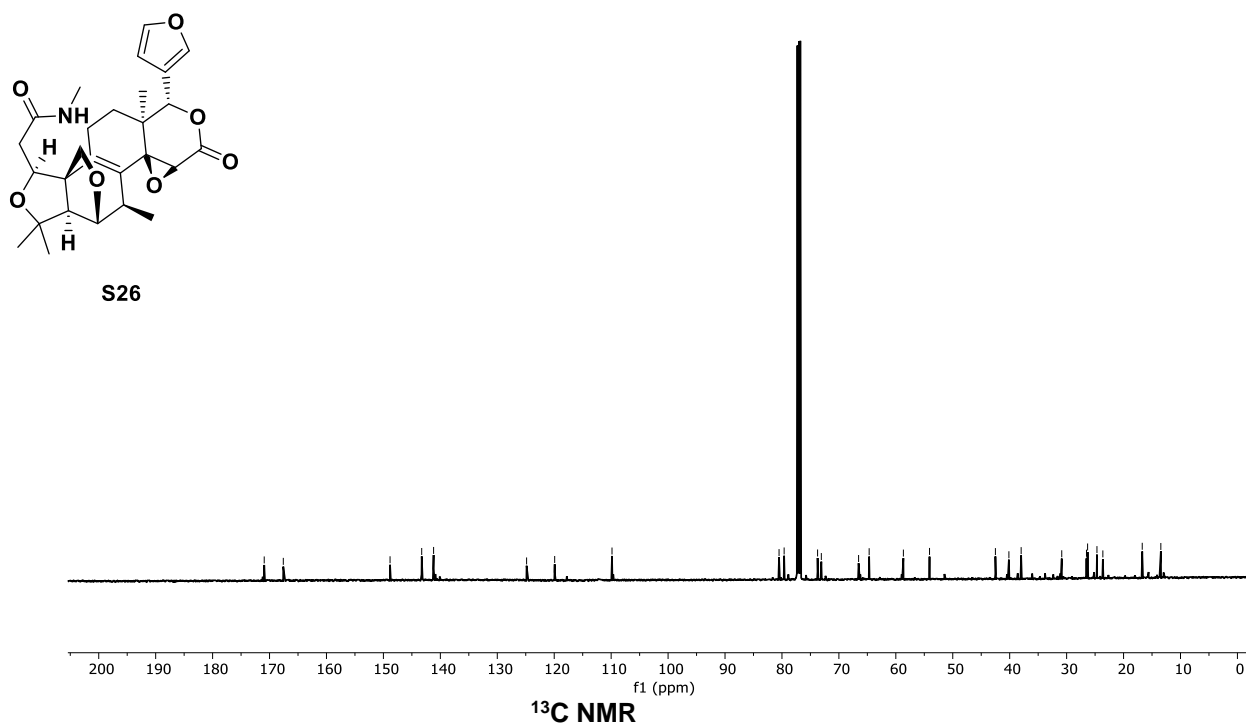

## SUPPORTING INFORMATION

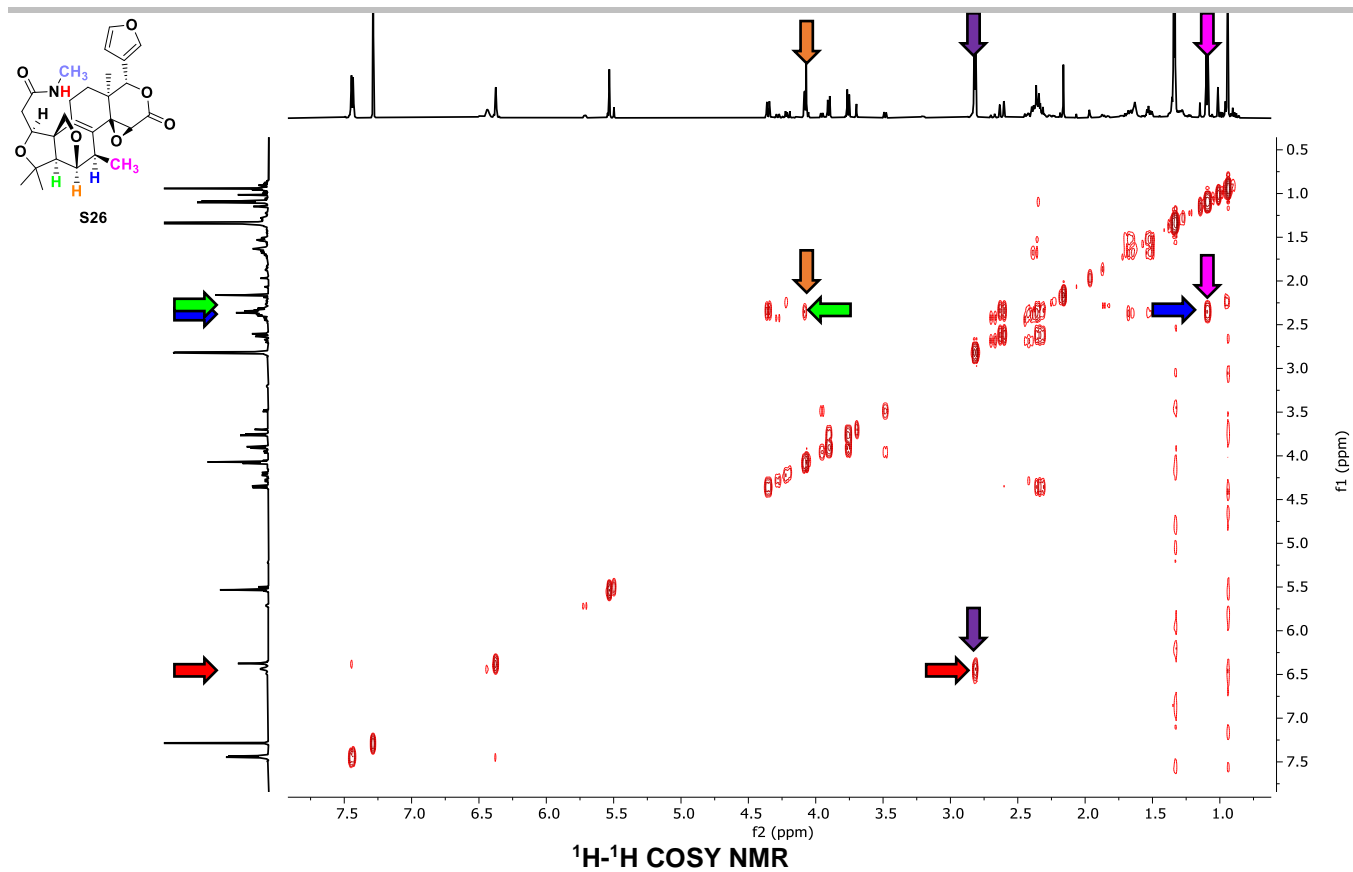

## SUPPORTING INFORMATION

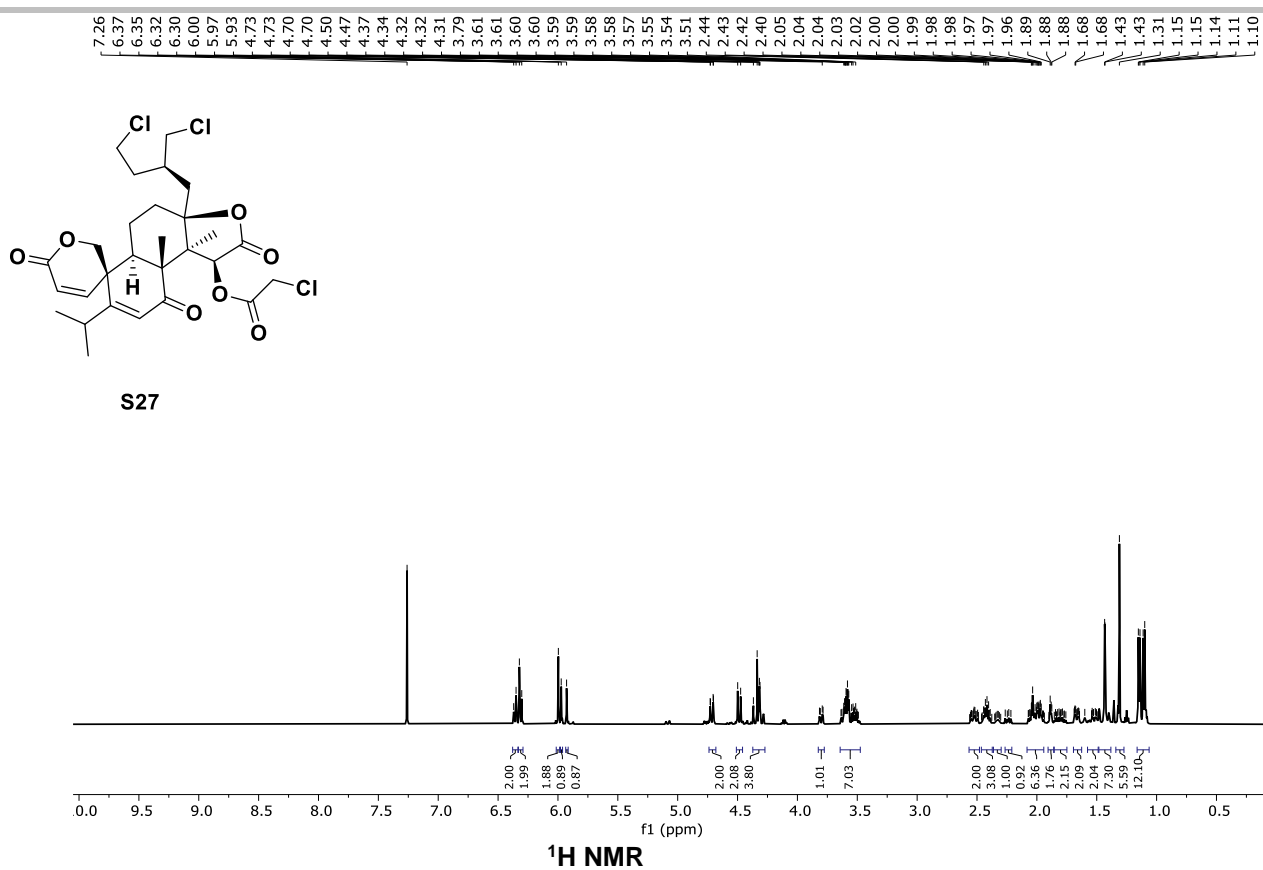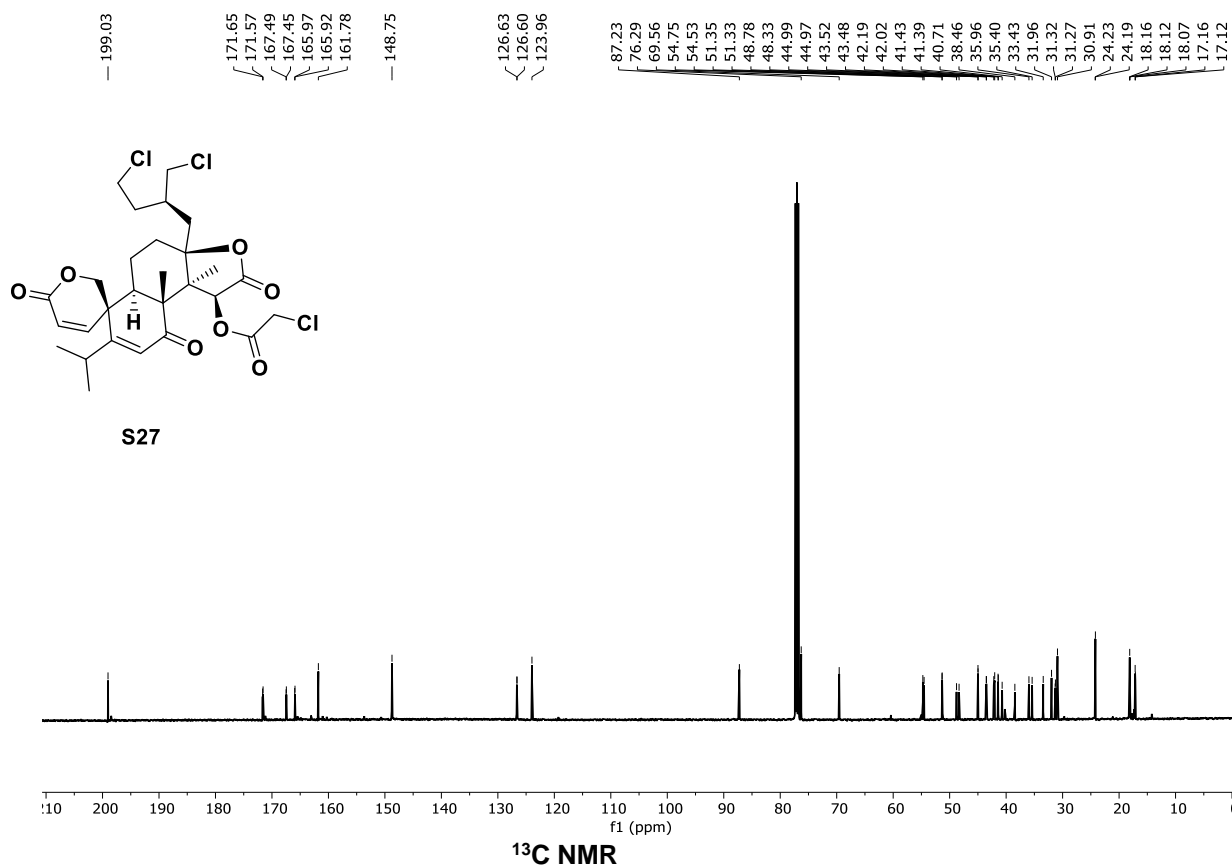

## SUPPORTING INFORMATION

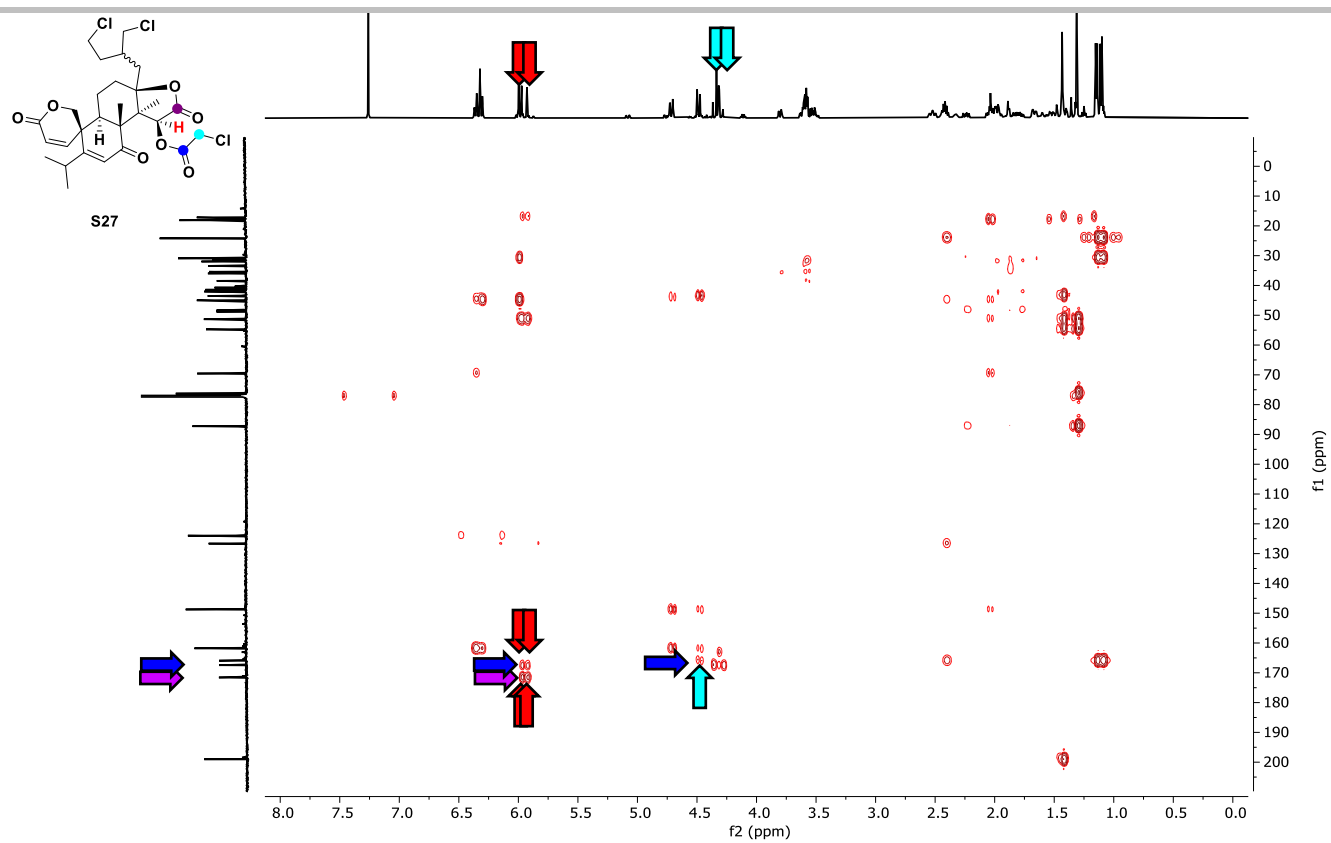 $^1\text{H}$ - $^{13}\text{C}$  HMBC NMR

## SUPPORTING INFORMATION

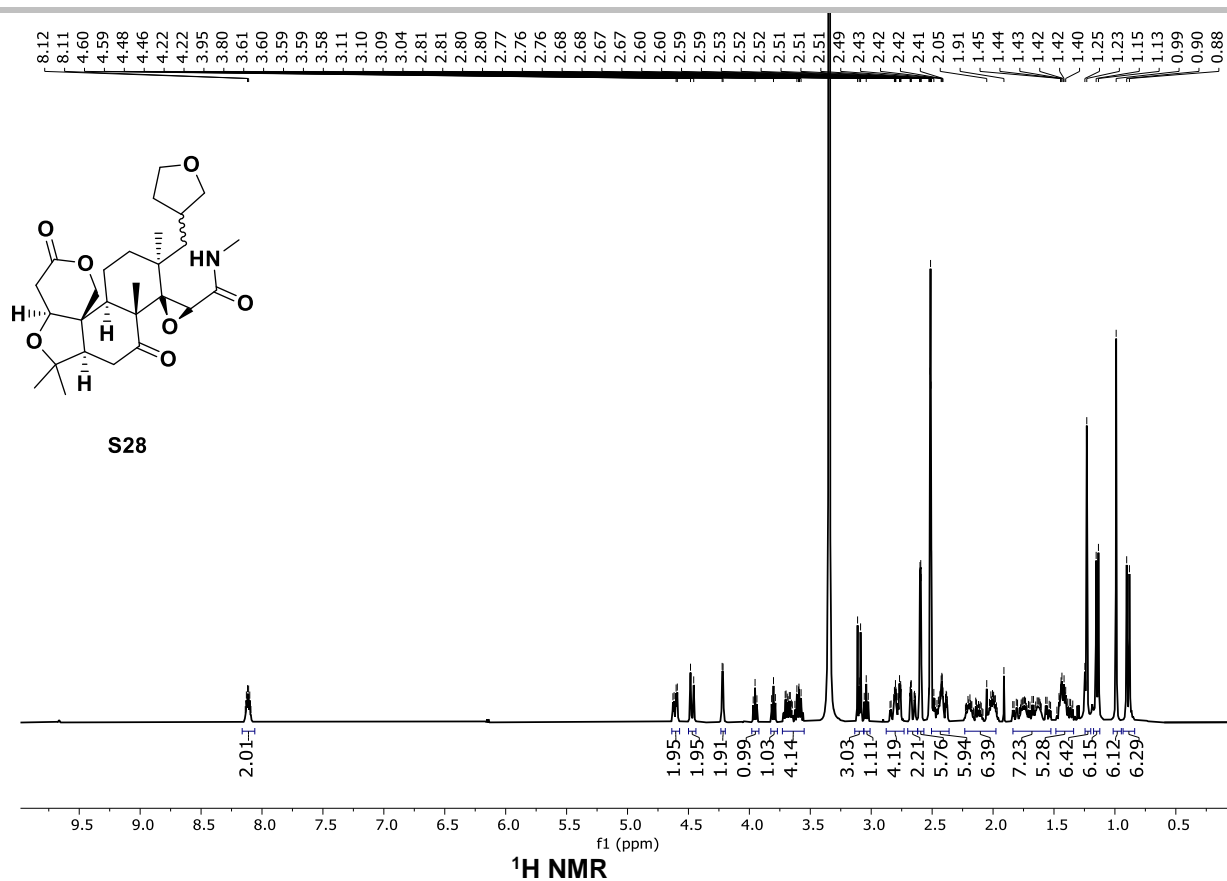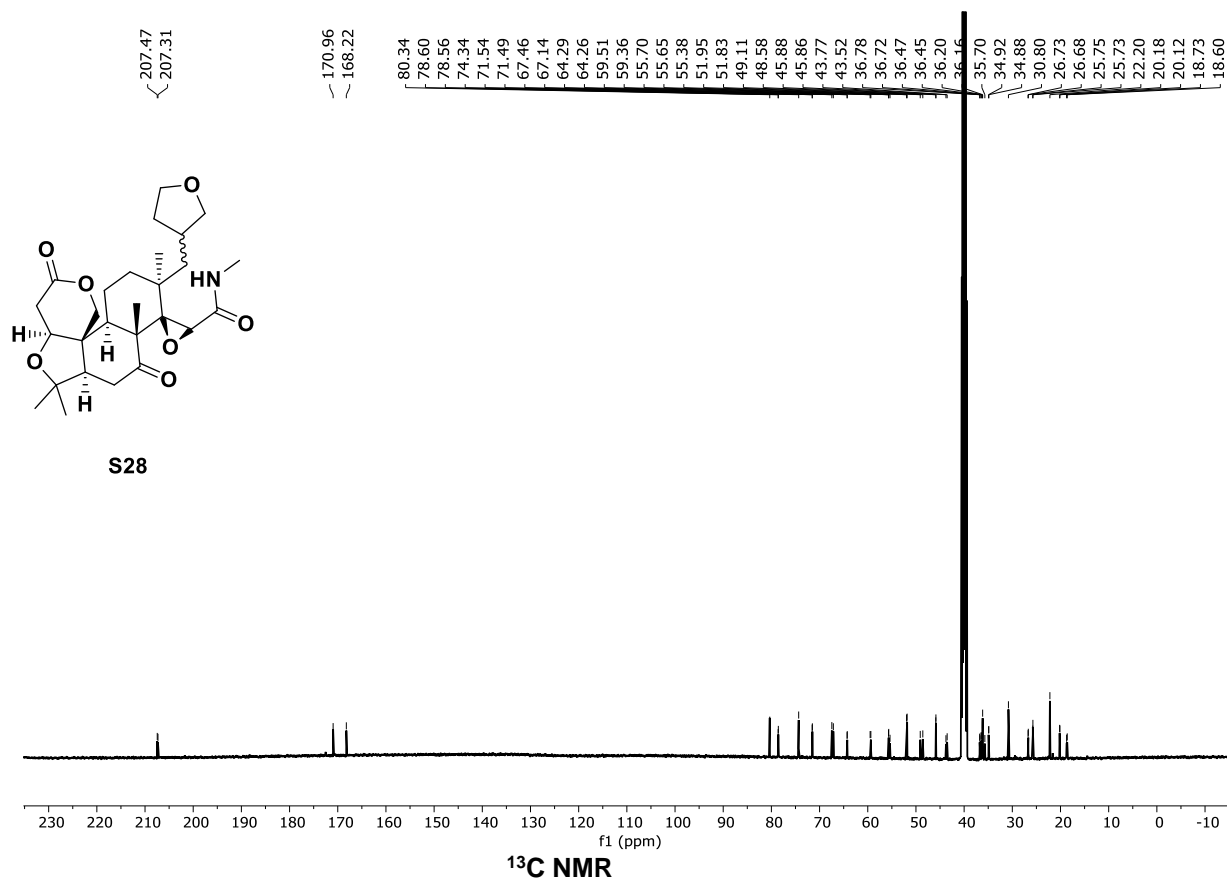



## SUPPORTING INFORMATION

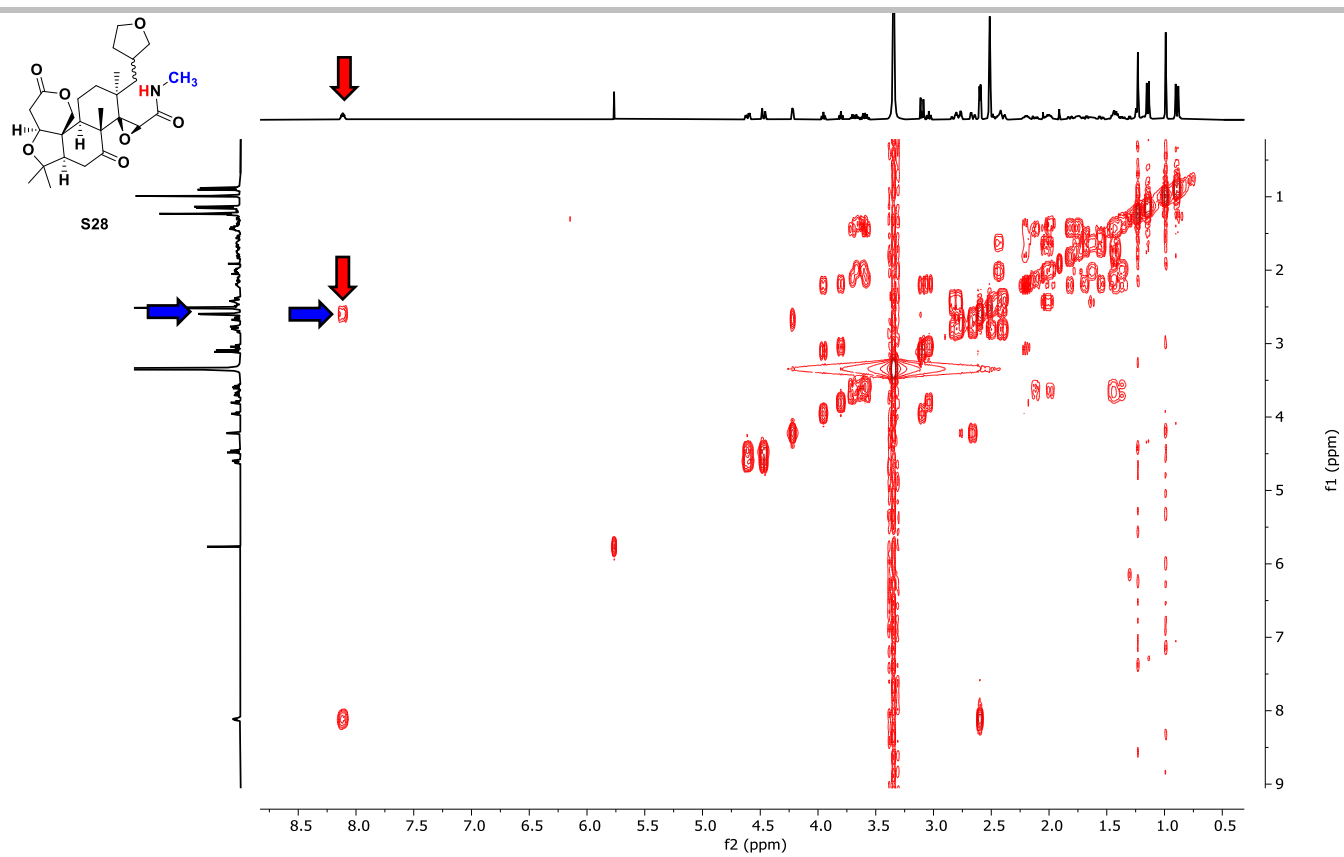

## SUPPORTING INFORMATION

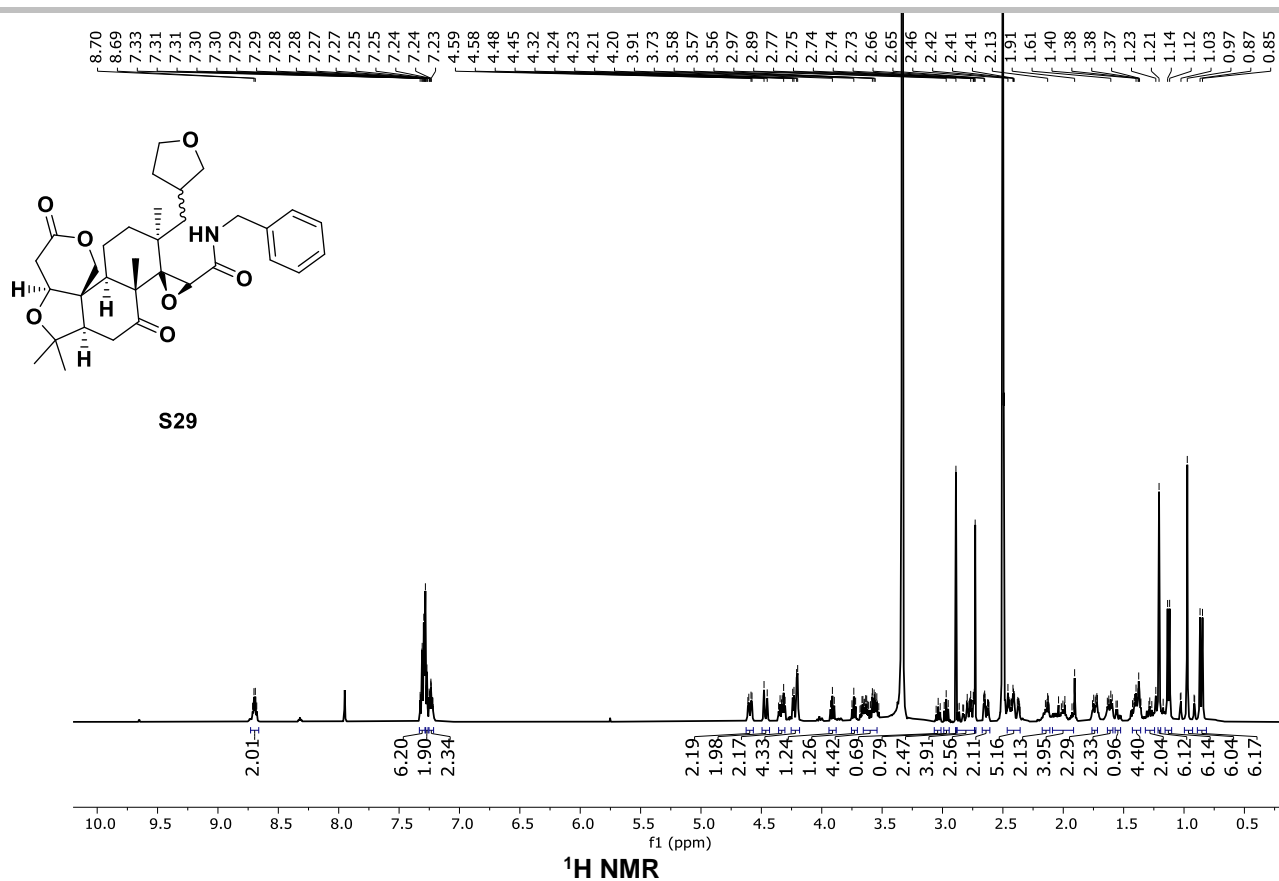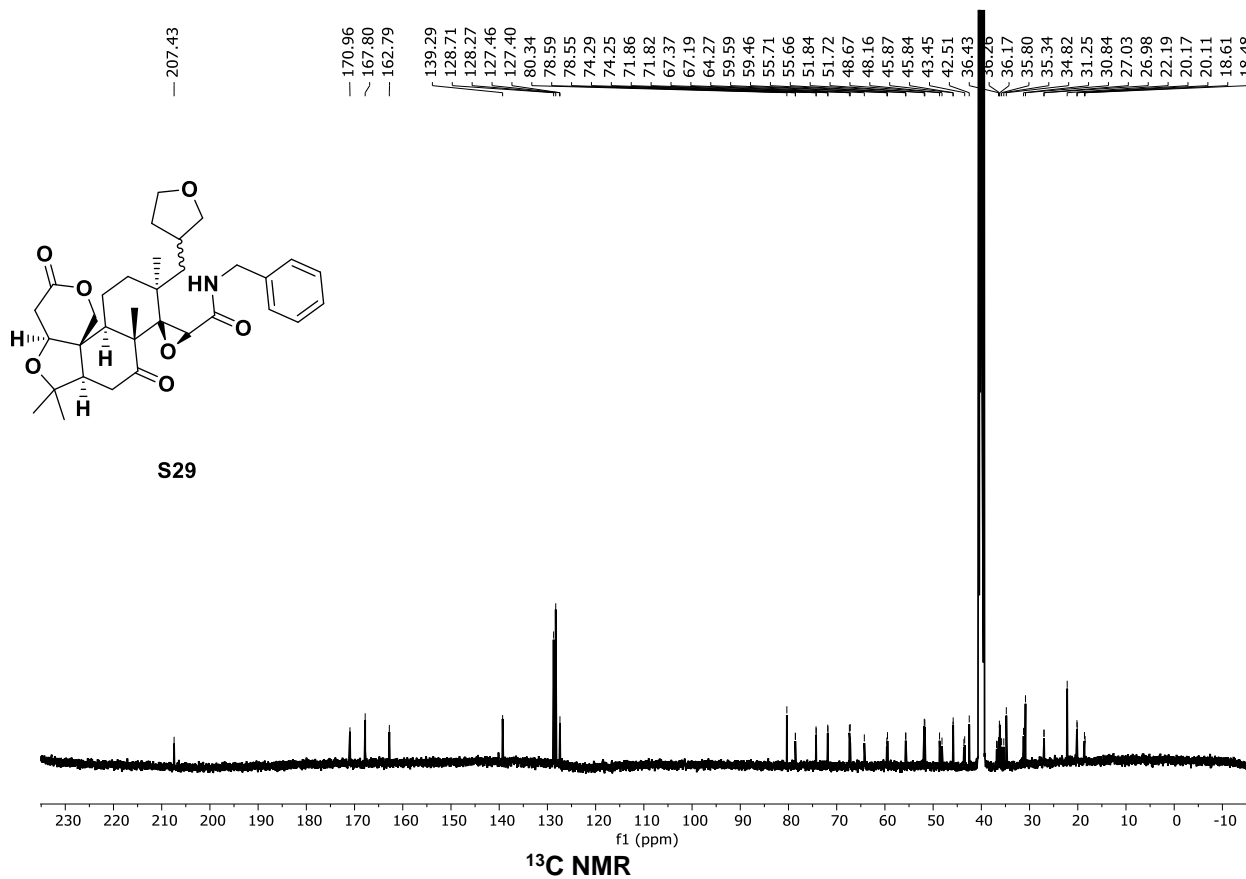

## SUPPORTING INFORMATION

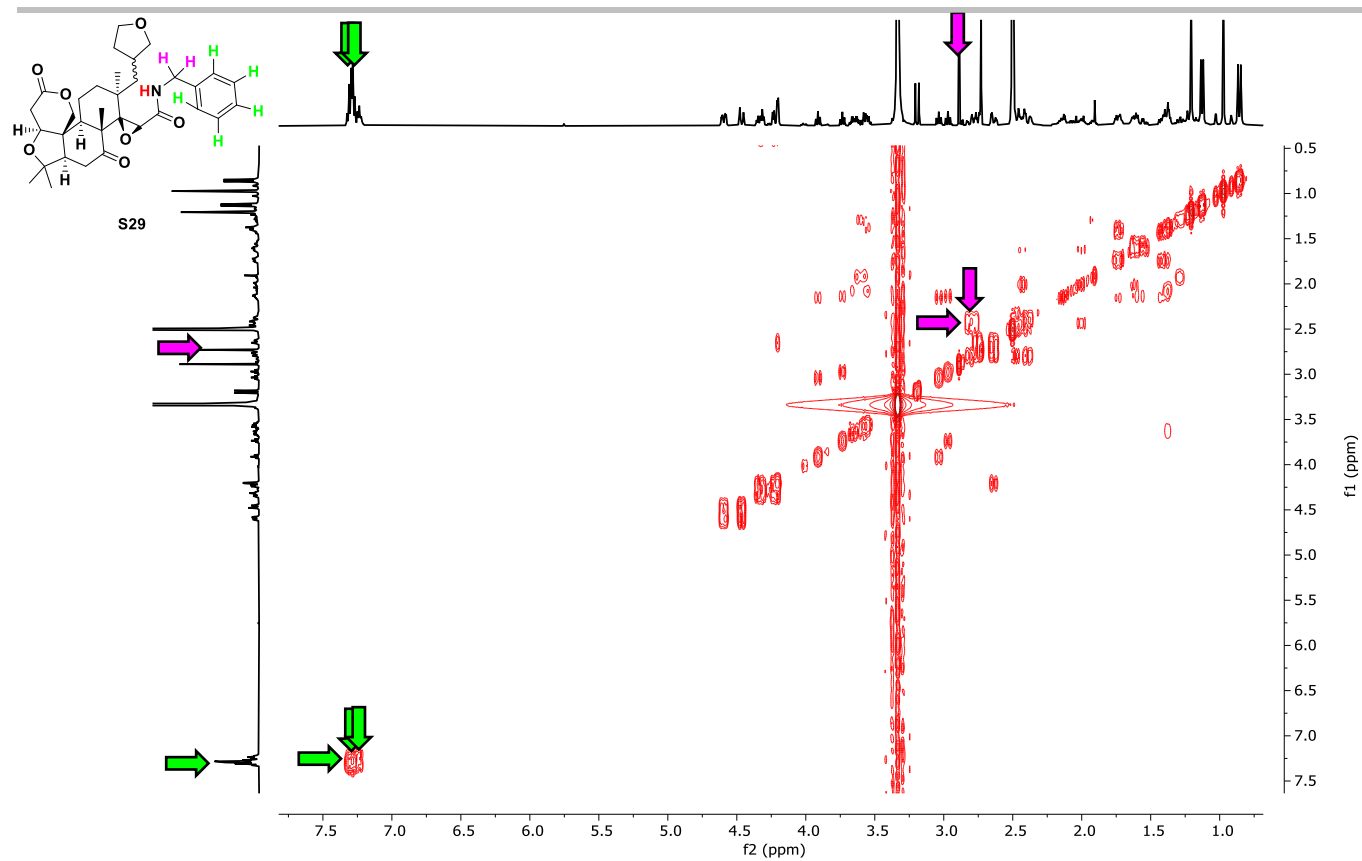

## SUPPORTING INFORMATION

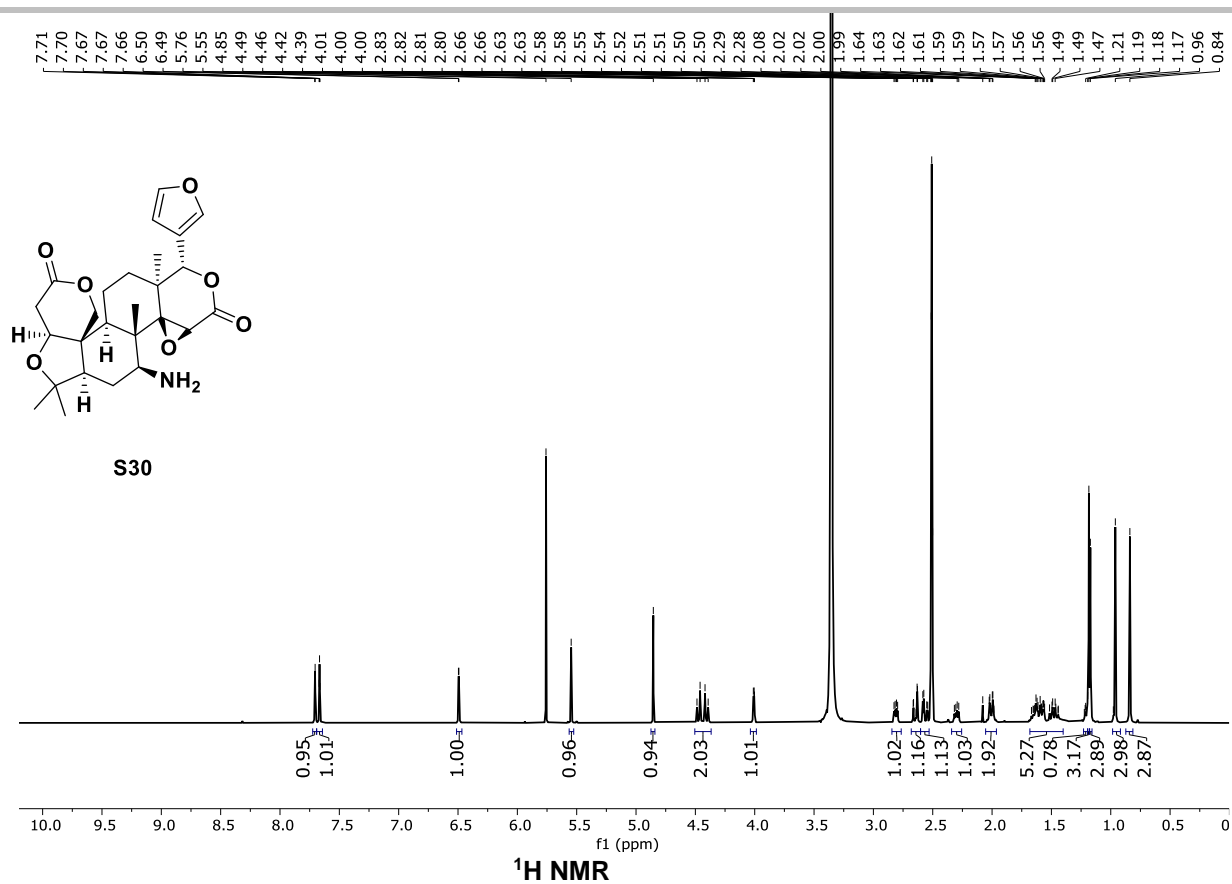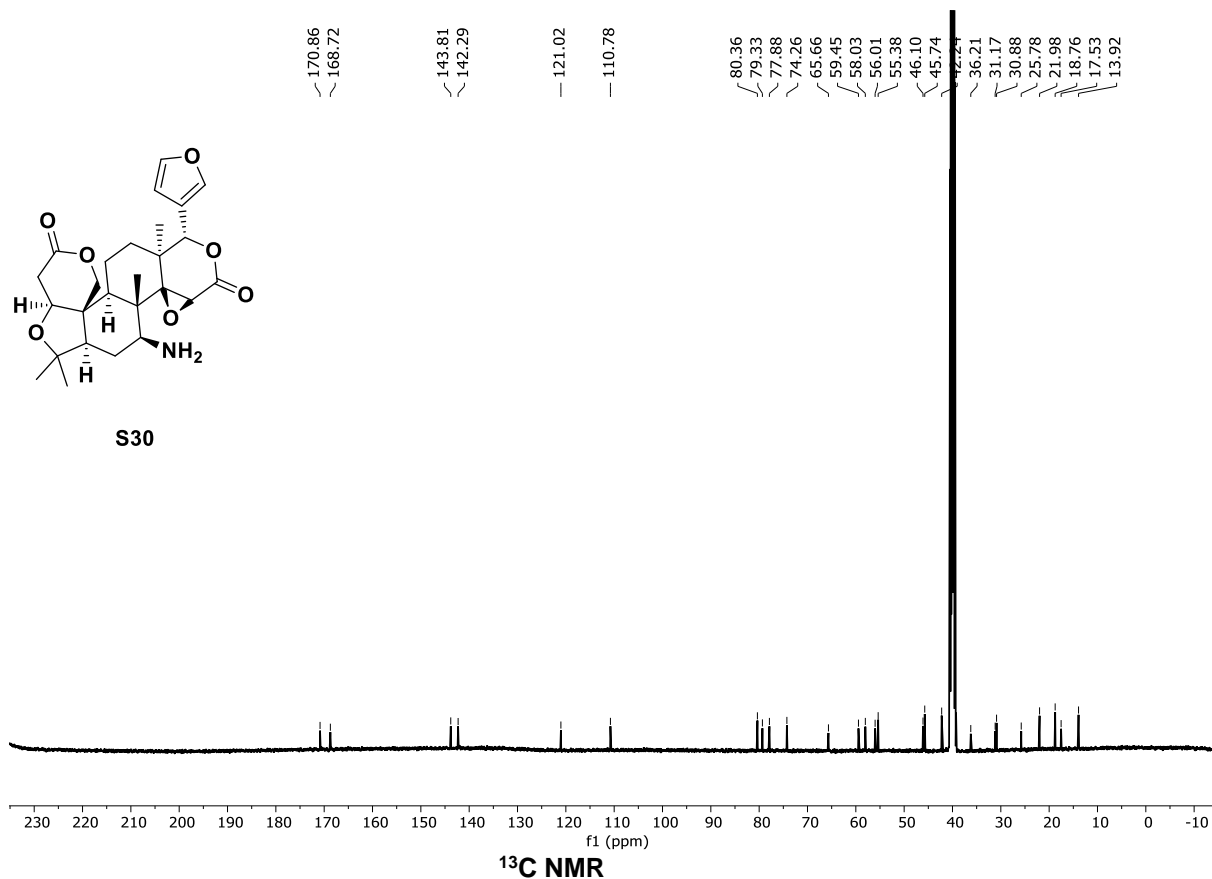

## SUPPORTING INFORMATION

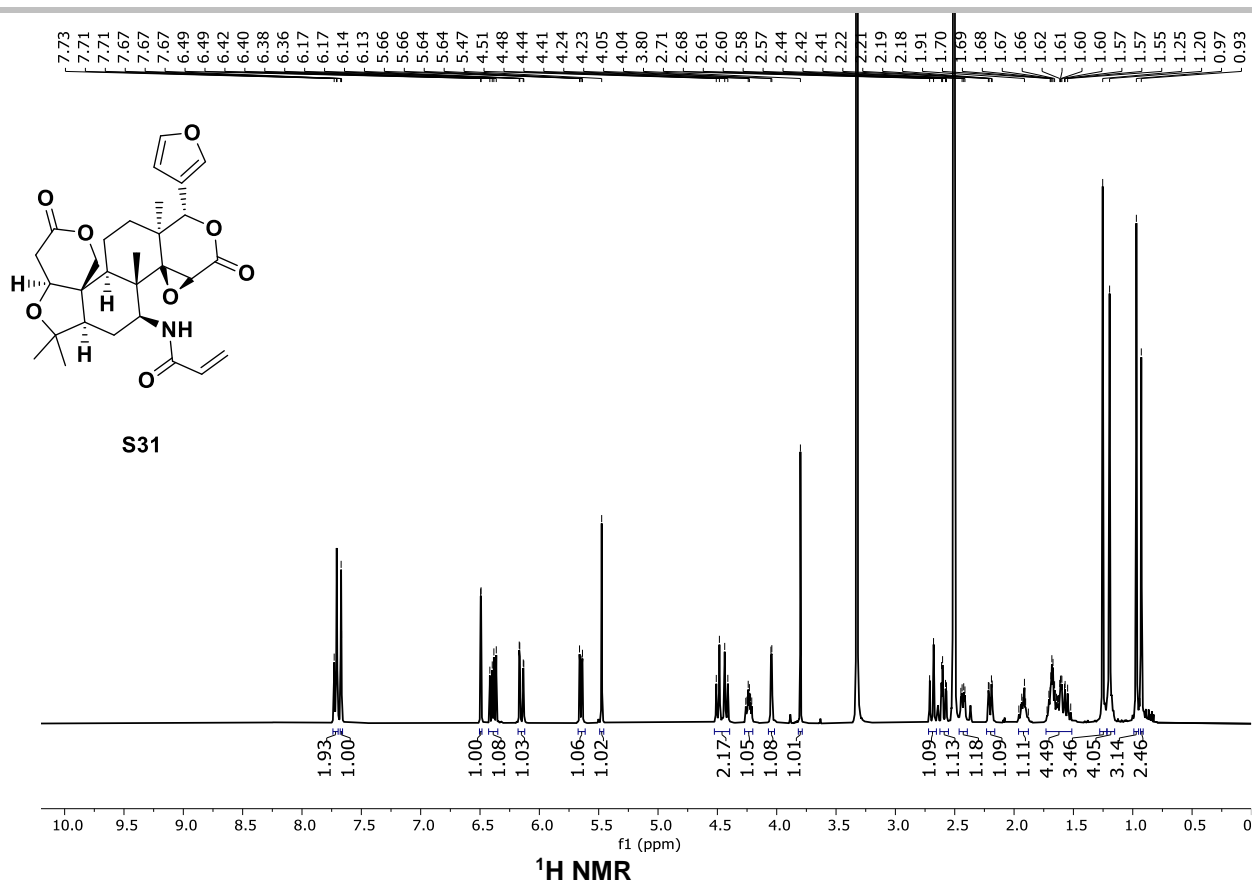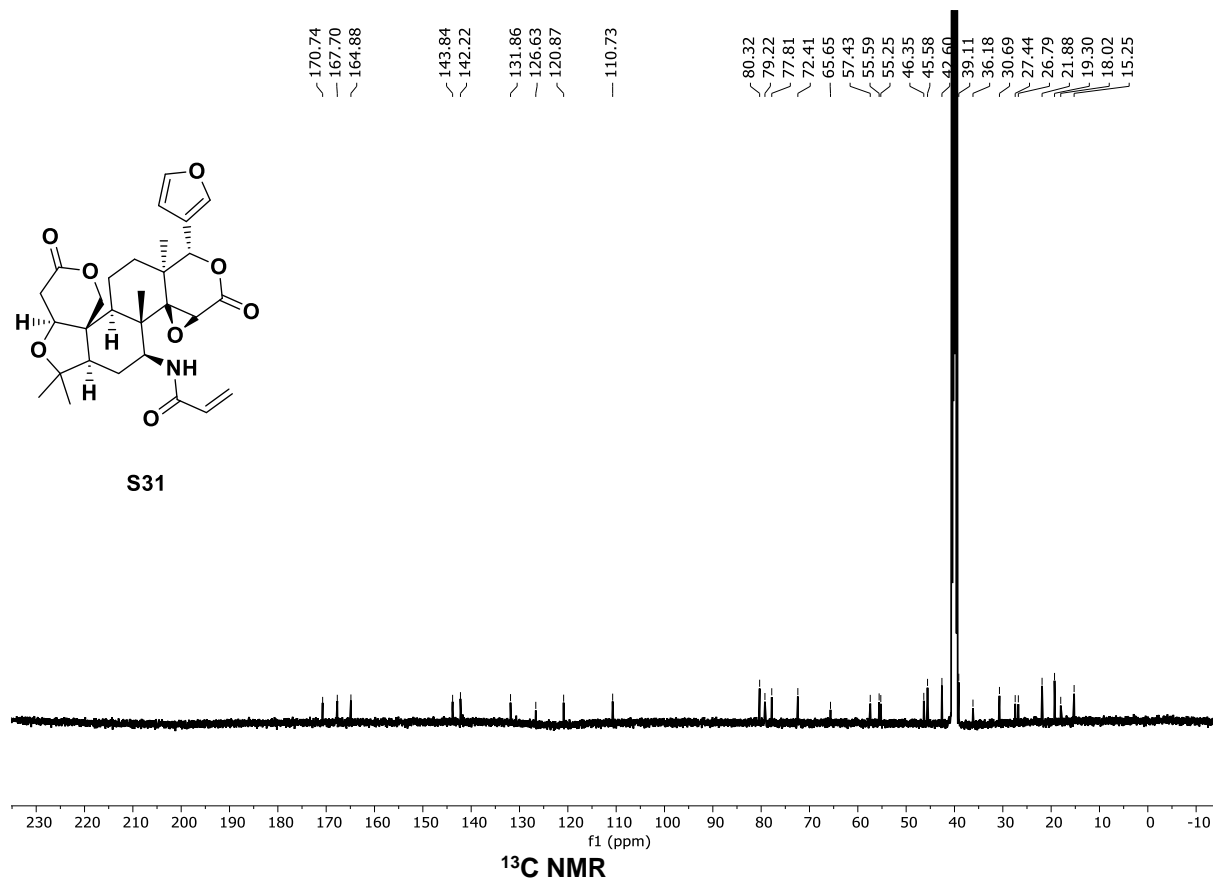

## SUPPORTING INFORMATION

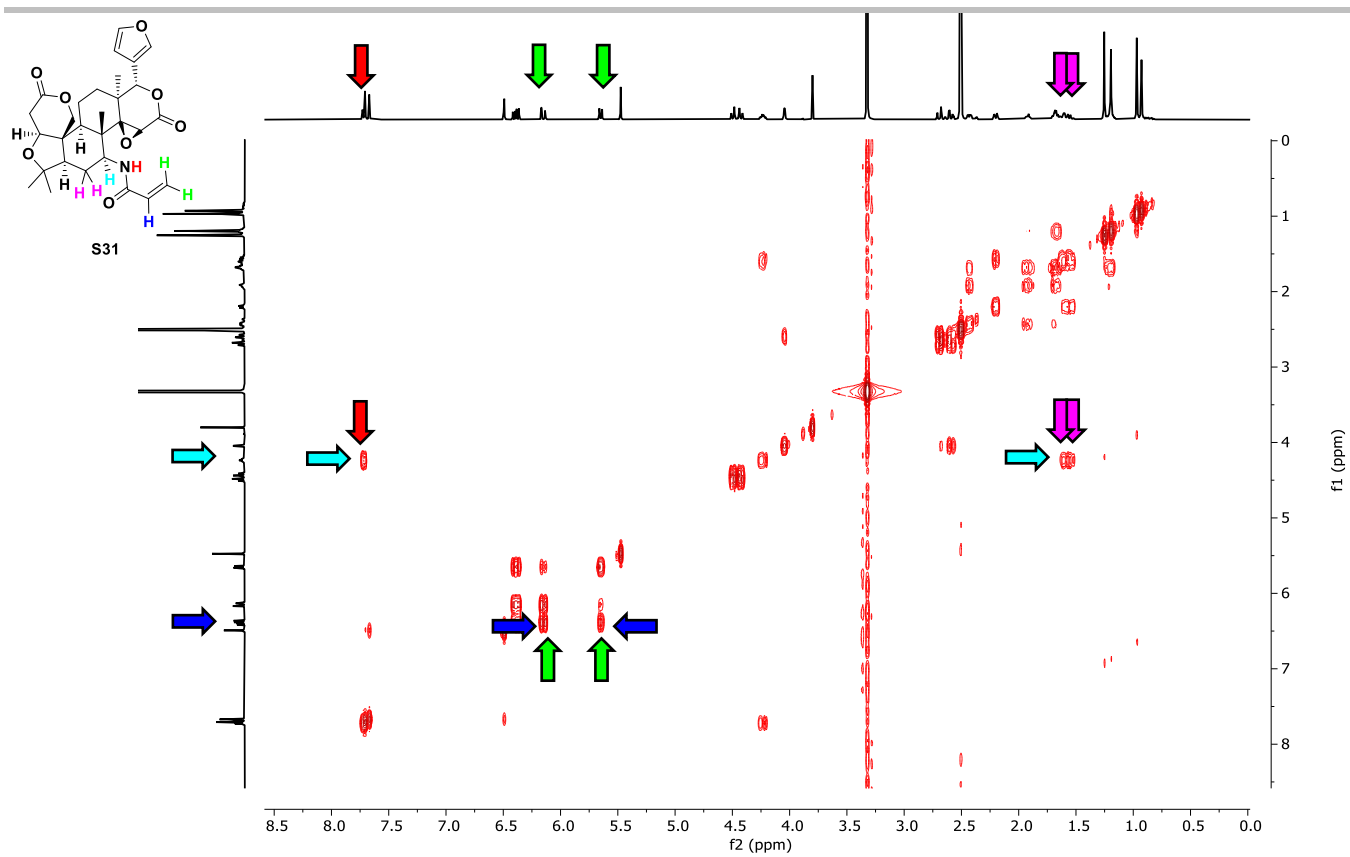 $^1\text{H}$ - $^1\text{H}$  COSY NMR

## SUPPORTING INFORMATION

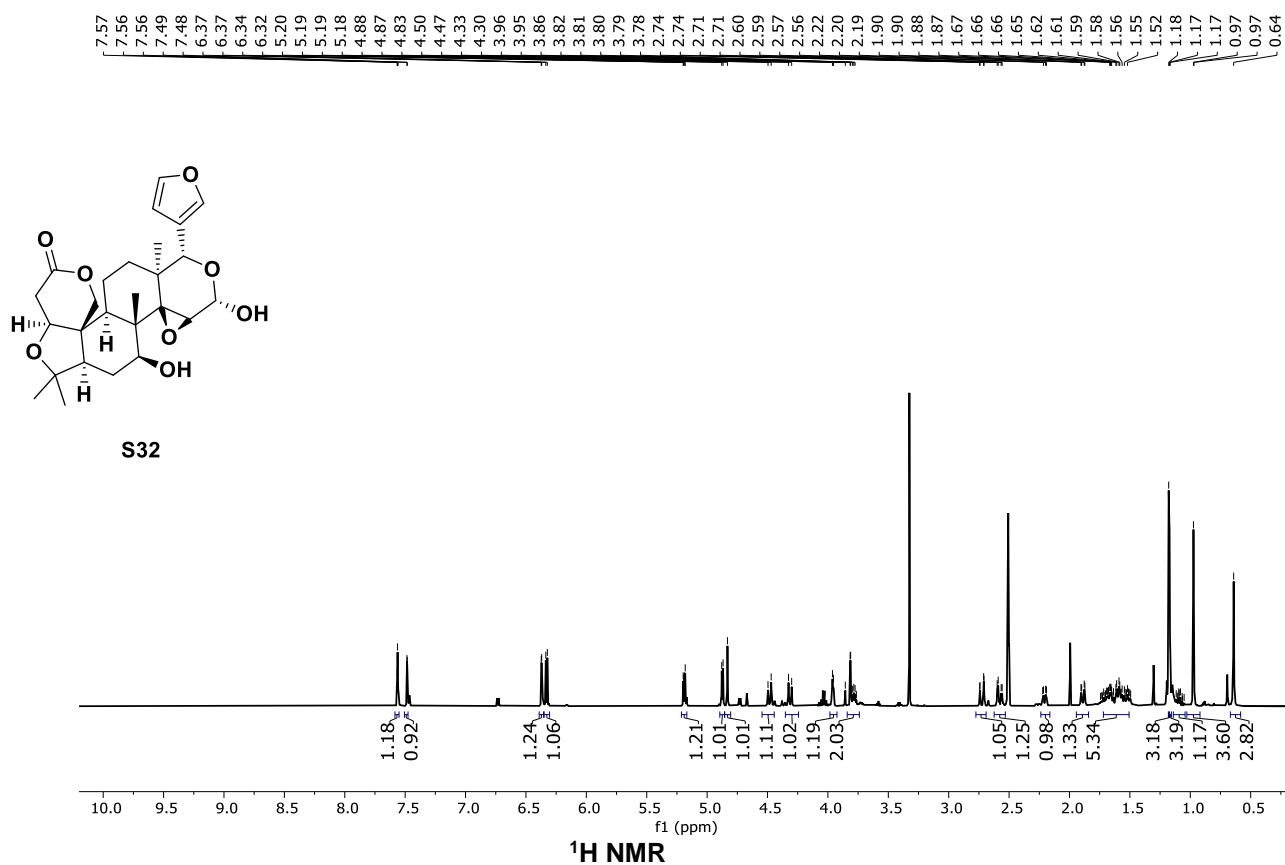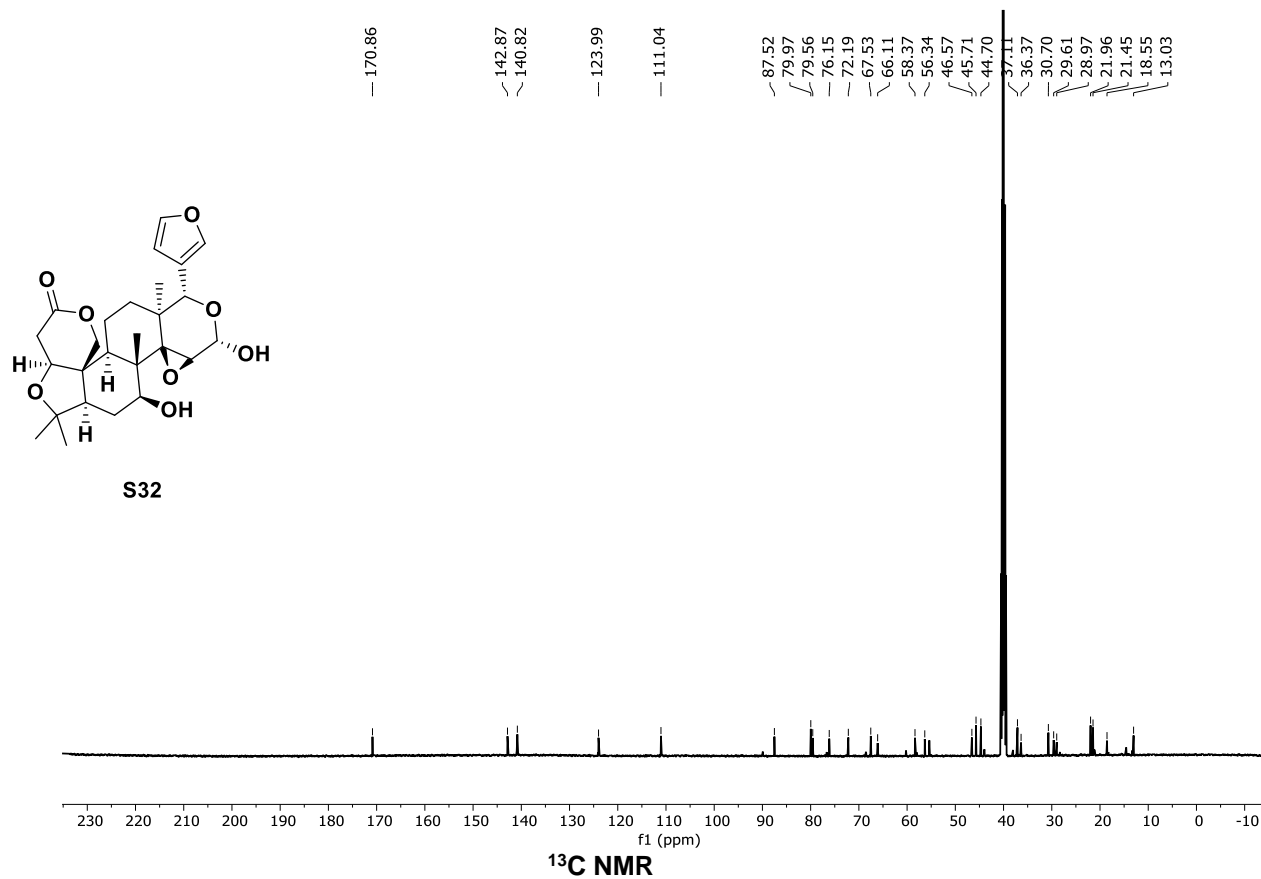

## SUPPORTING INFORMATION

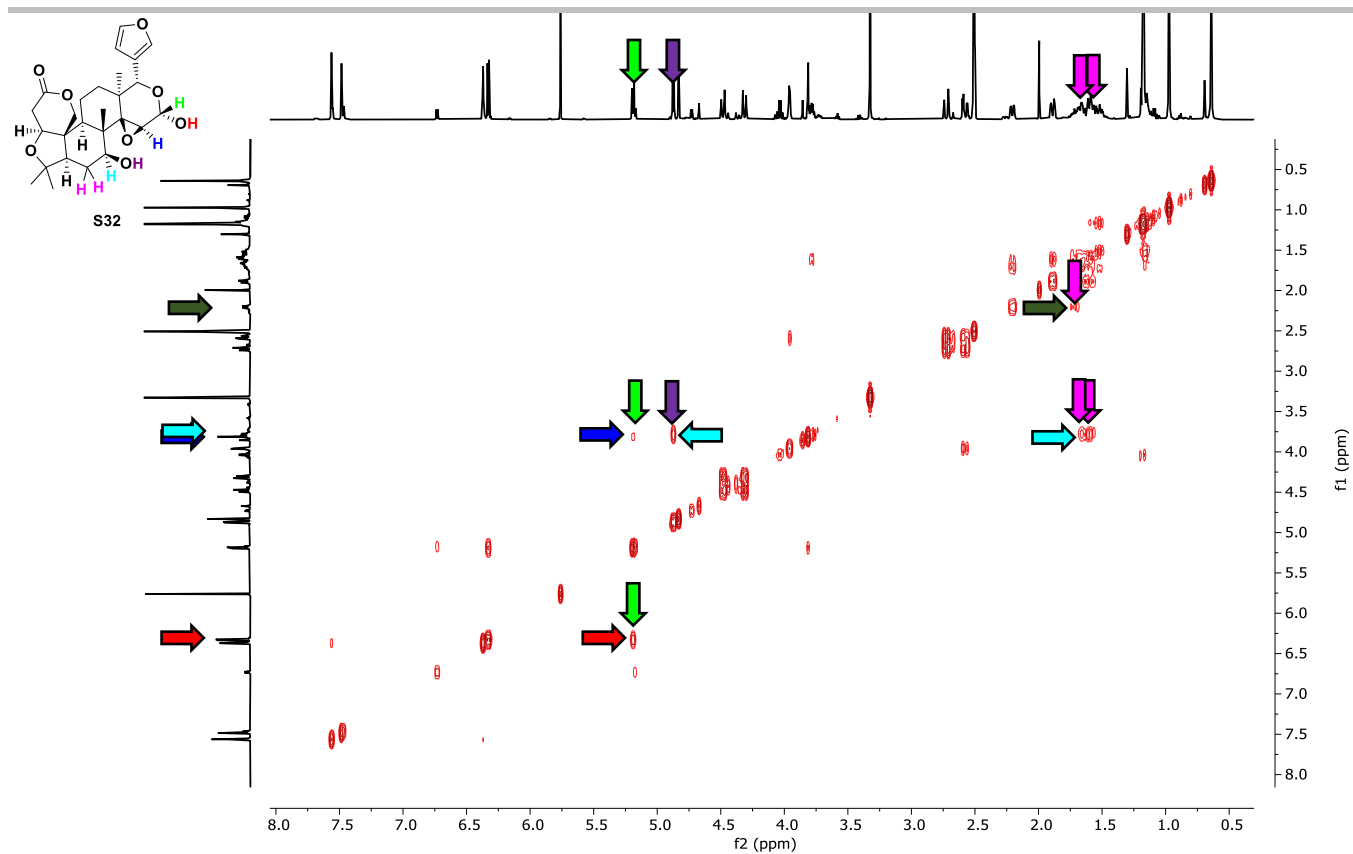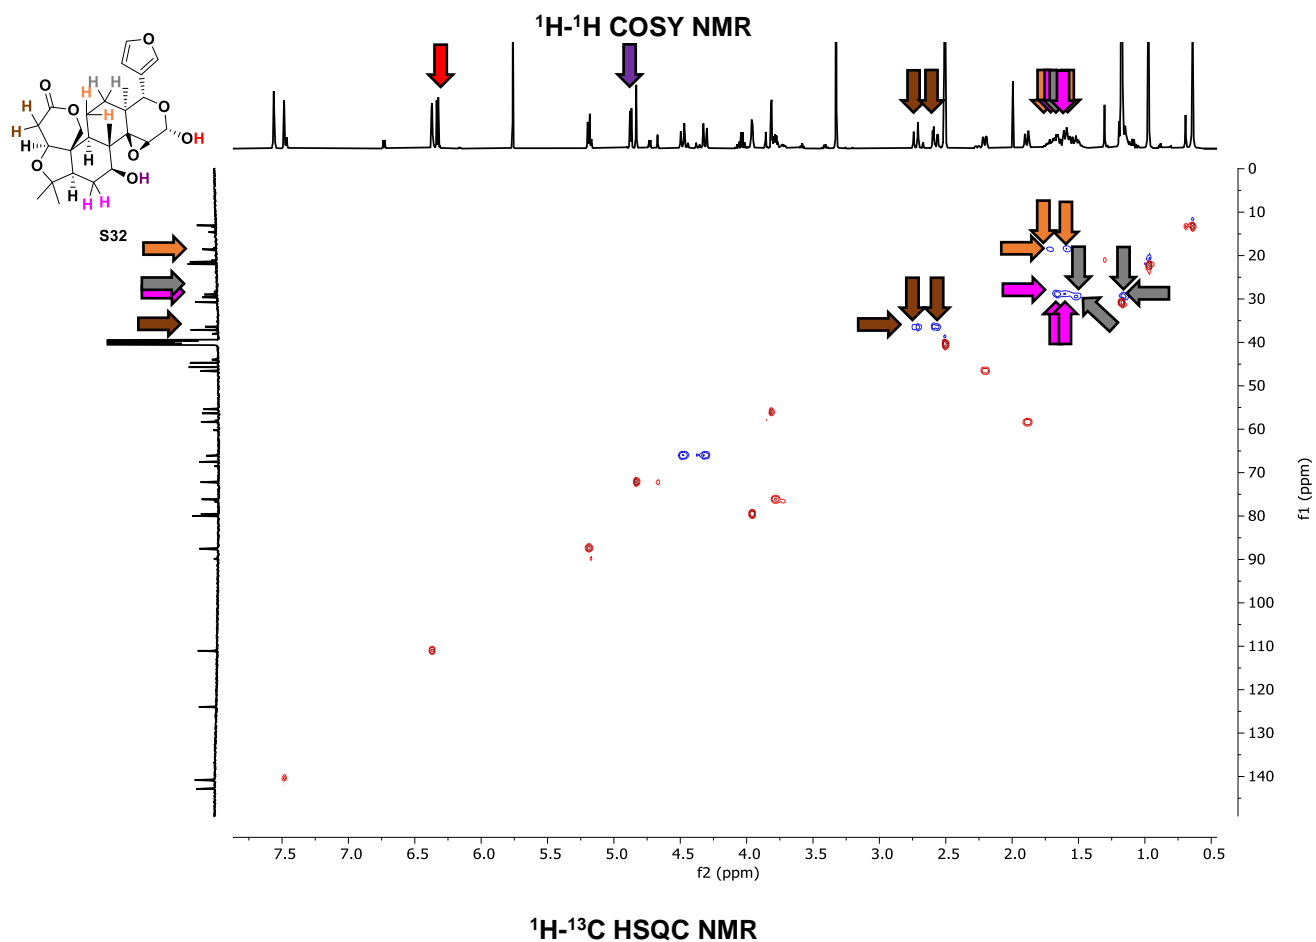



## SUPPORTING INFORMATION

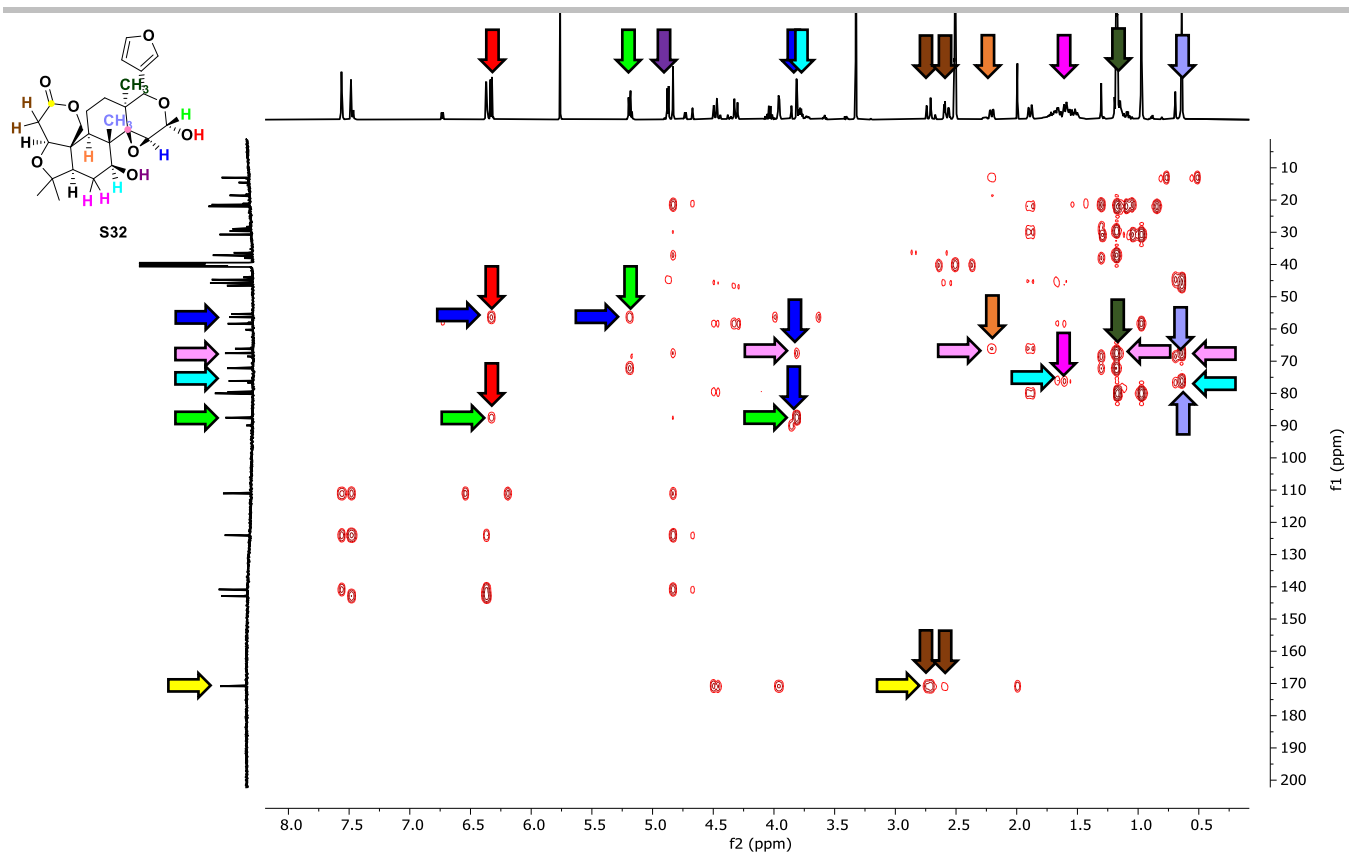 $^1\text{H}$ - $^{13}\text{C}$  HMBC NMR

## SUPPORTING INFORMATION

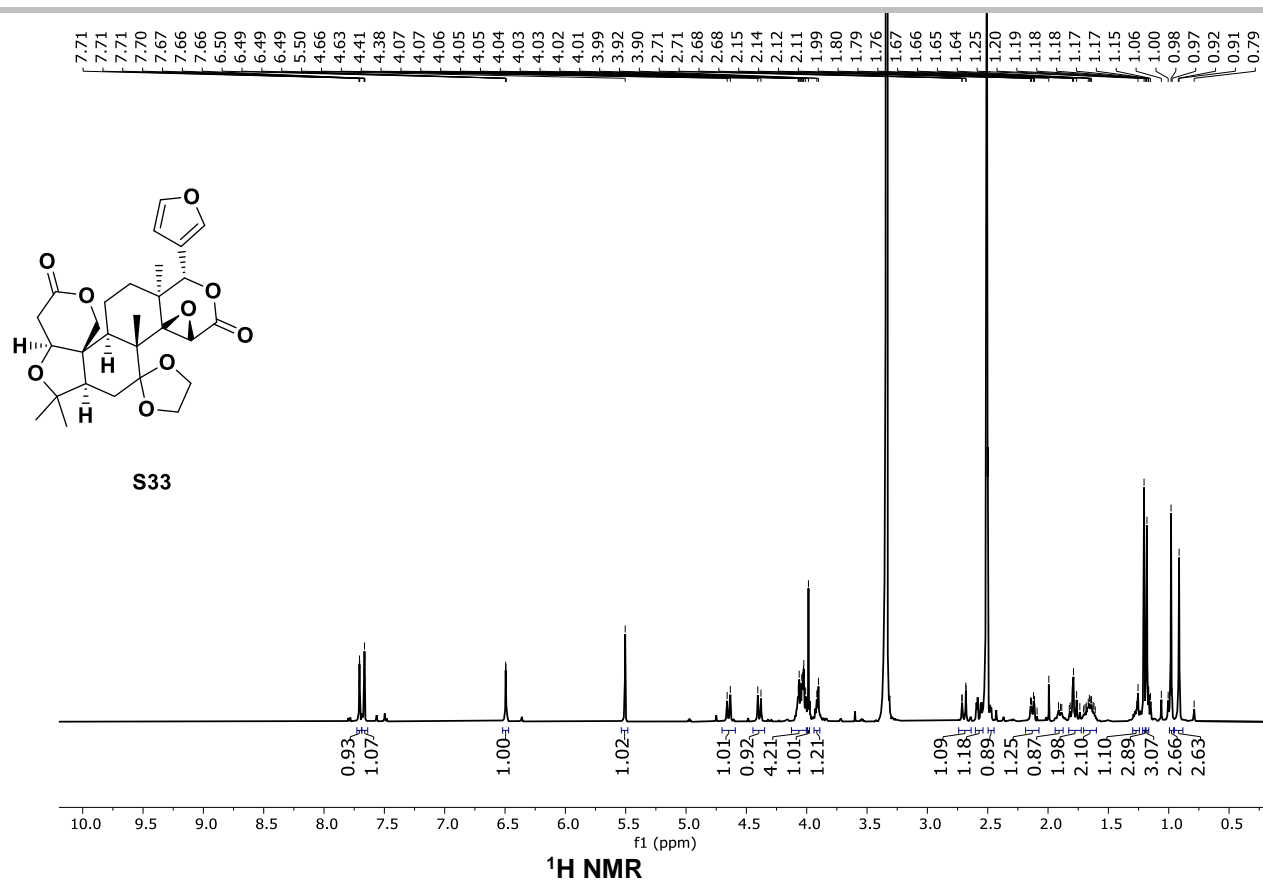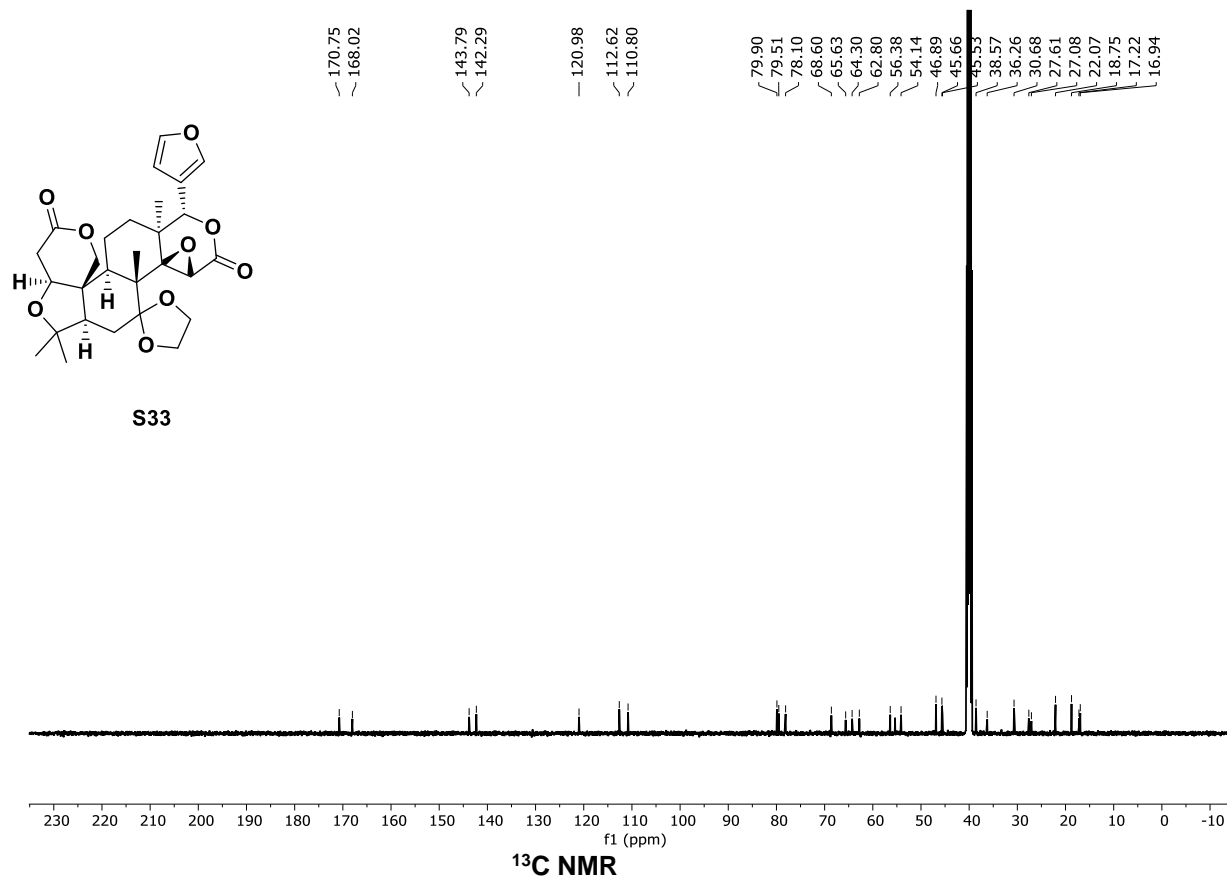

## SUPPORTING INFORMATION

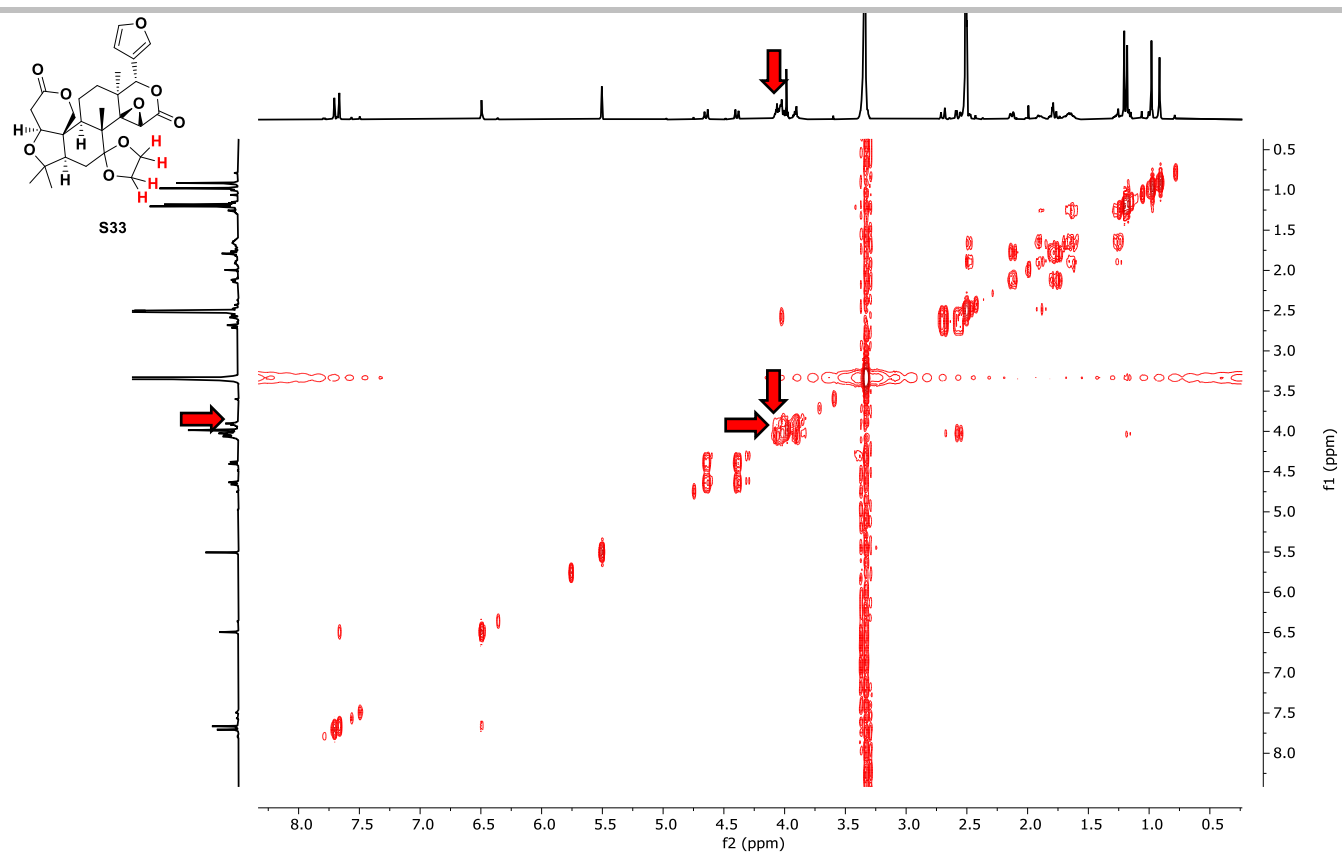 $^1\text{H}$ - $^1\text{H}$  COSY NMR

## SUPPORTING INFORMATION

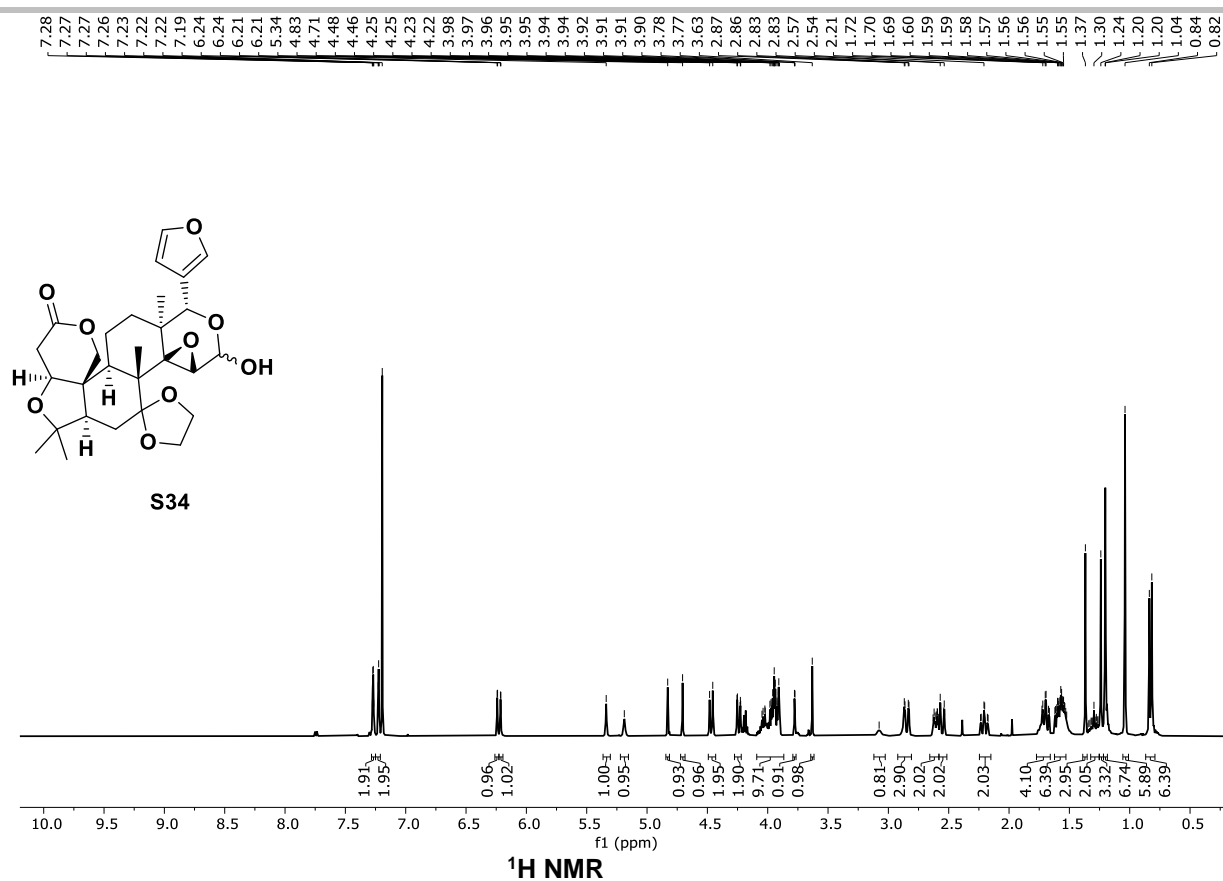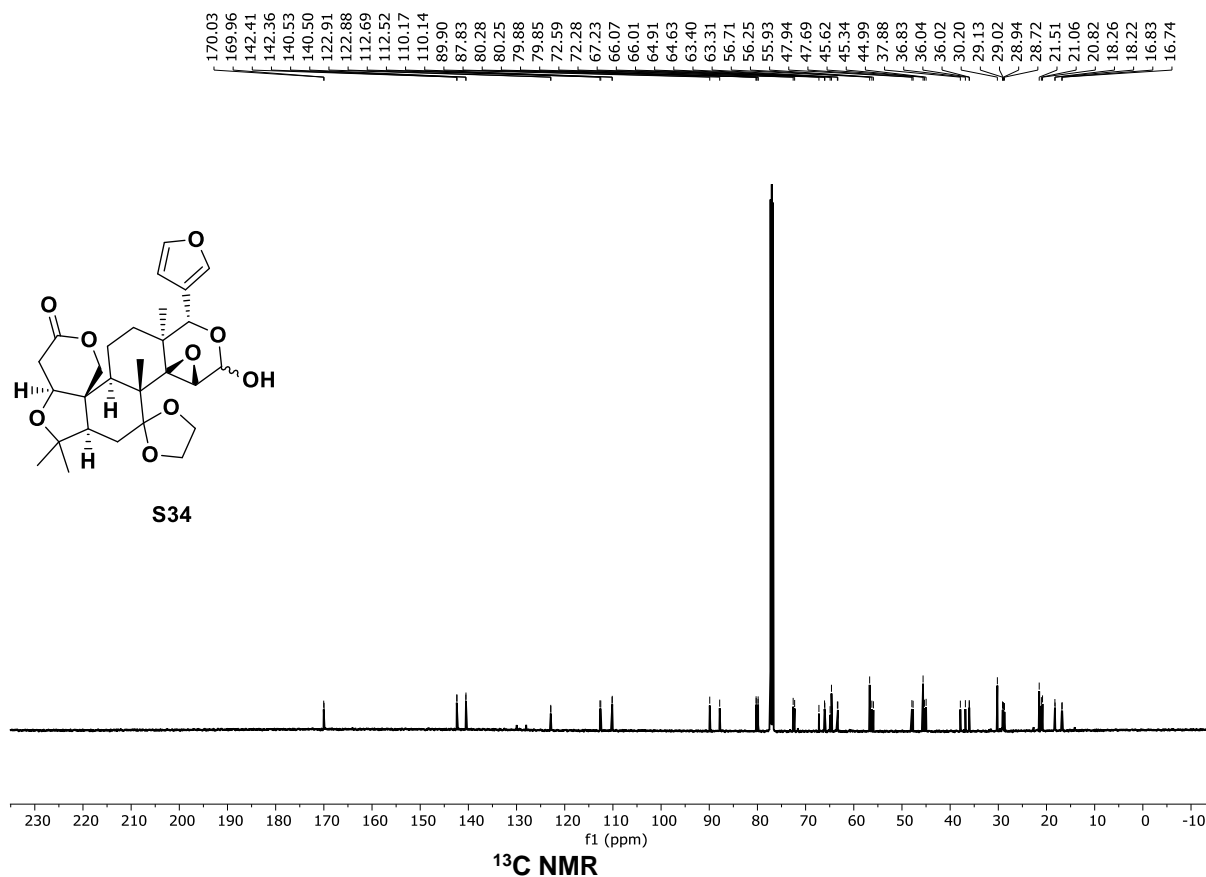

## SUPPORTING INFORMATION

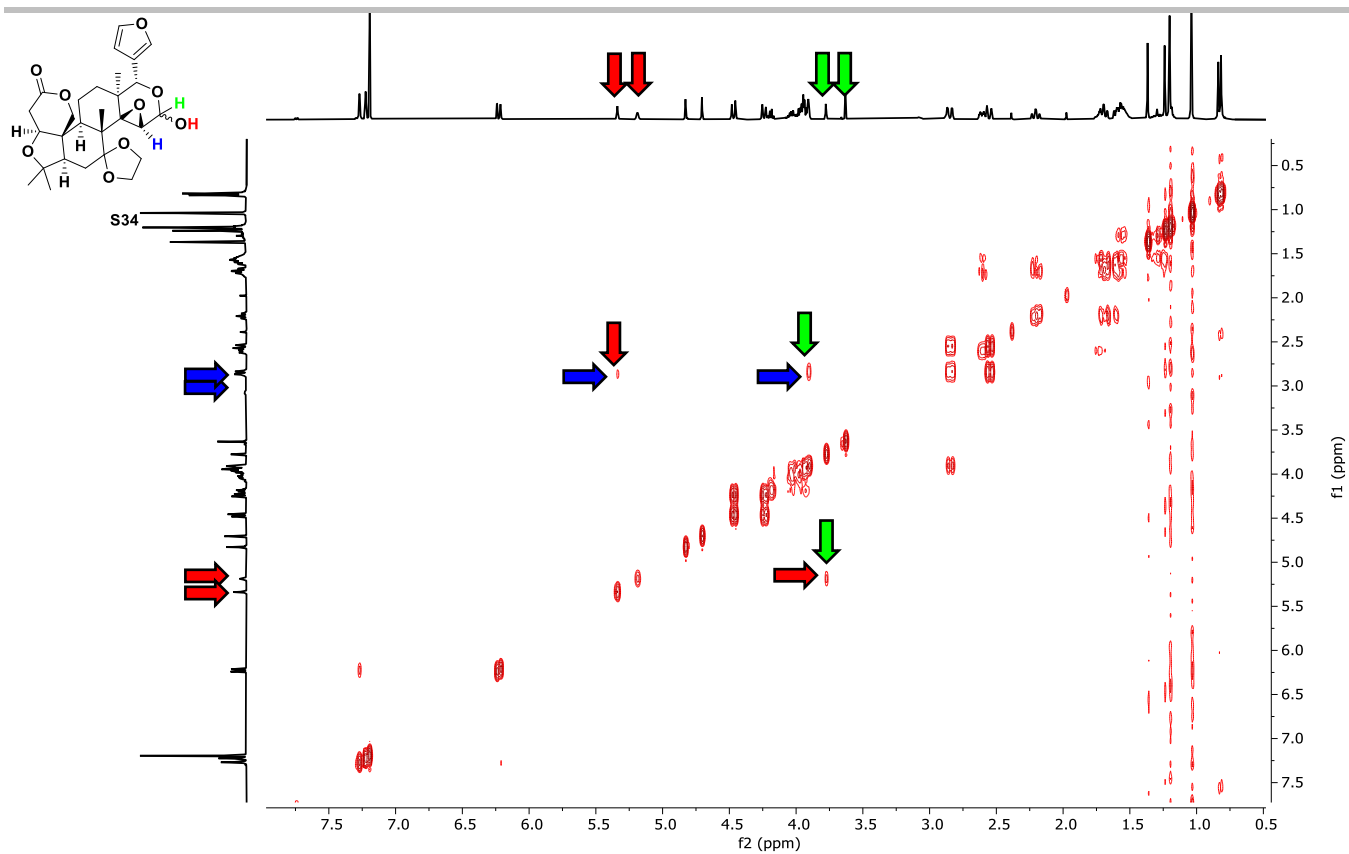

## SUPPORTING INFORMATION

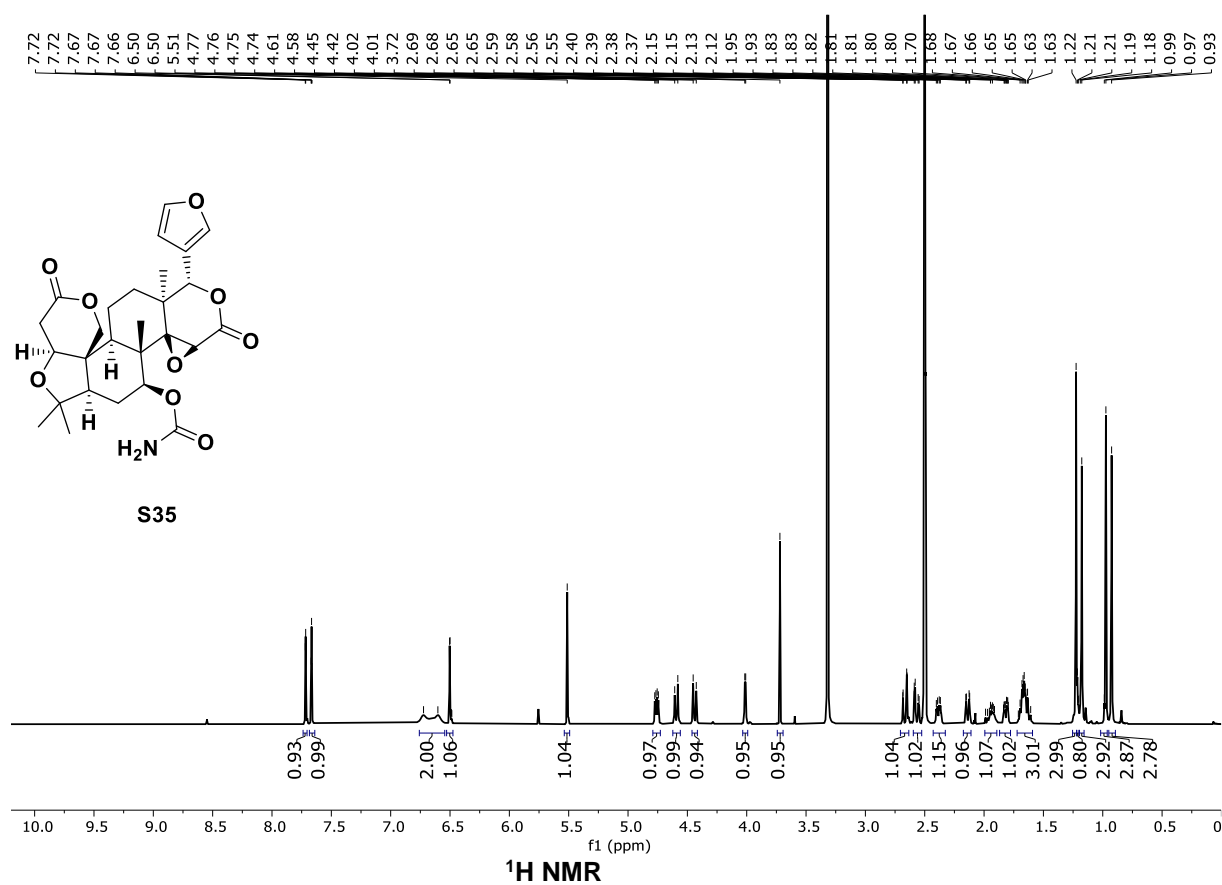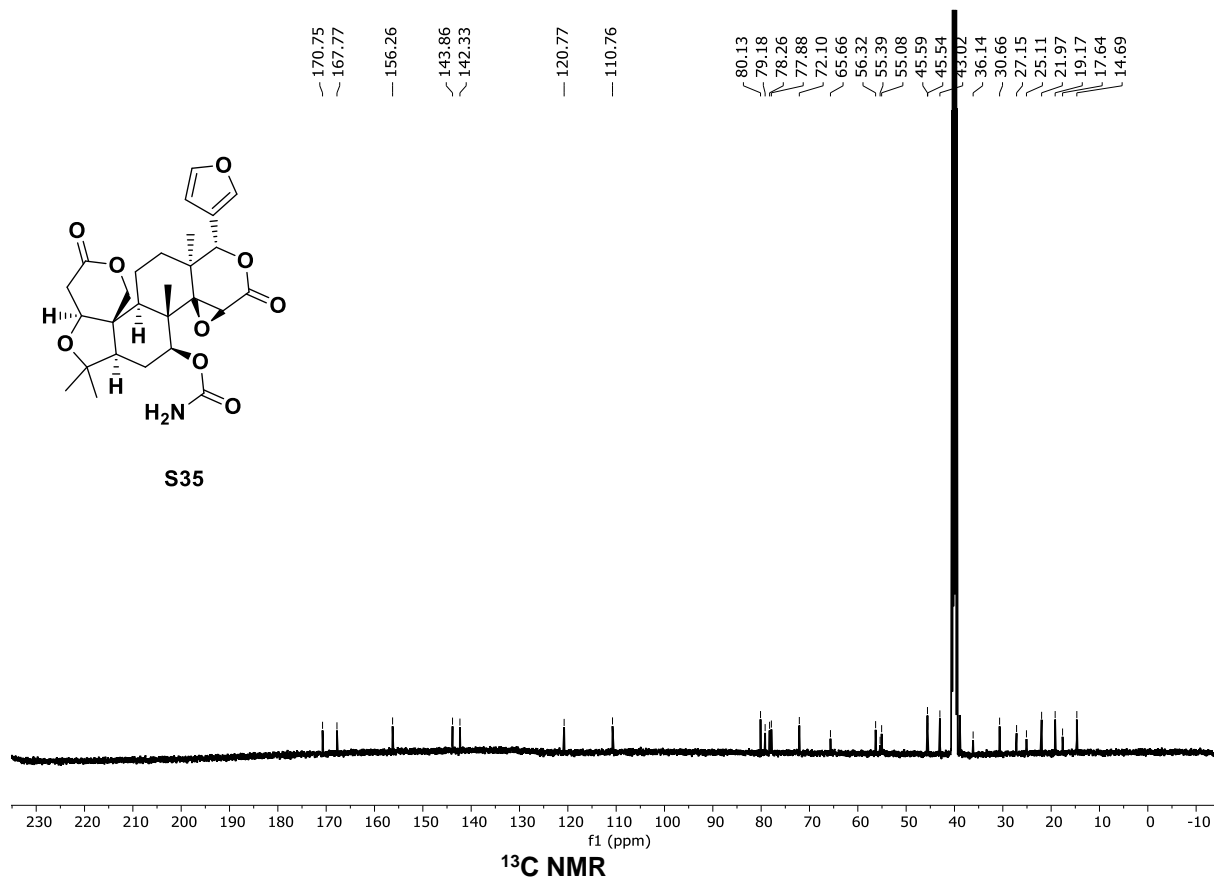

## SUPPORTING INFORMATION

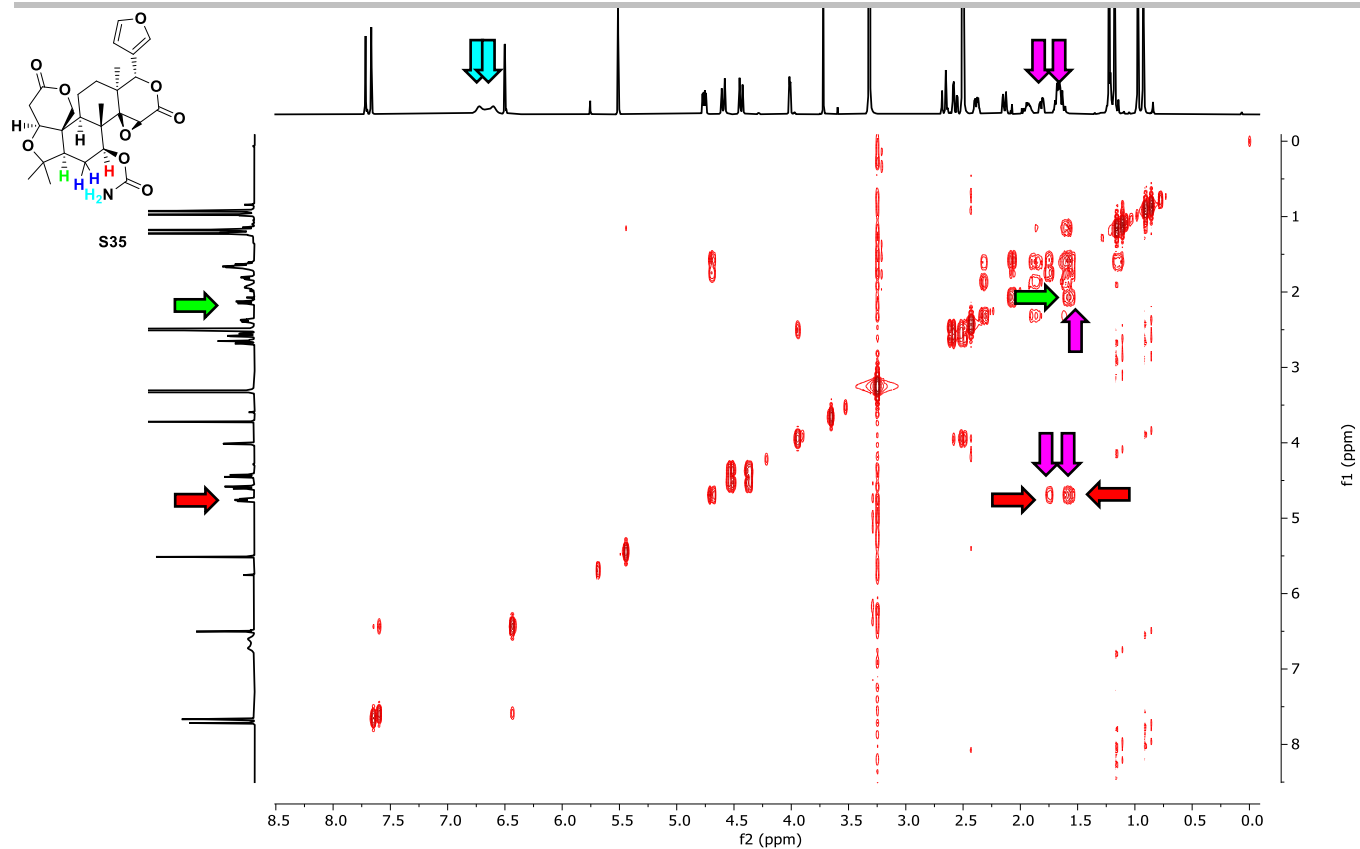 $^1\text{H}$ - $^1\text{H}$  COSY NMR

## SUPPORTING INFORMATION

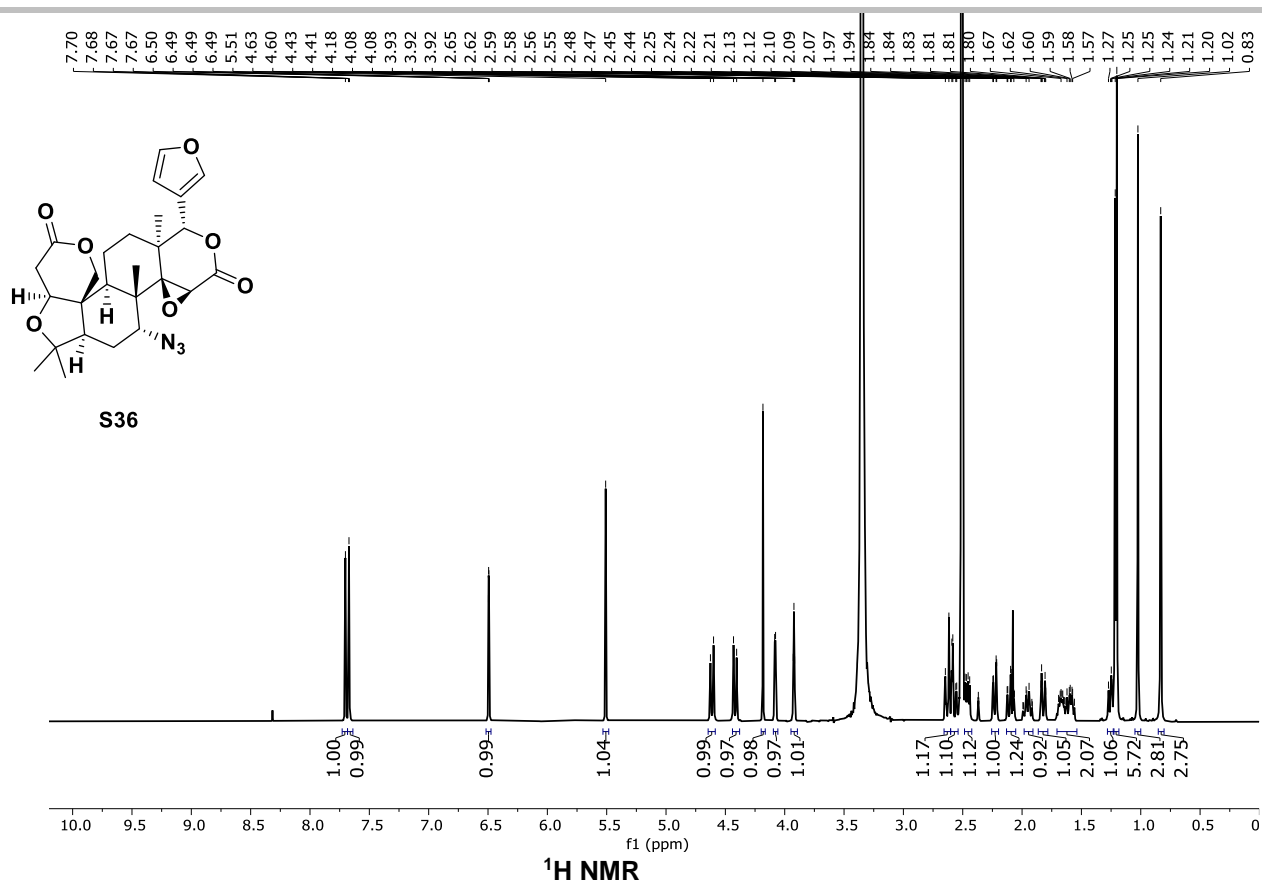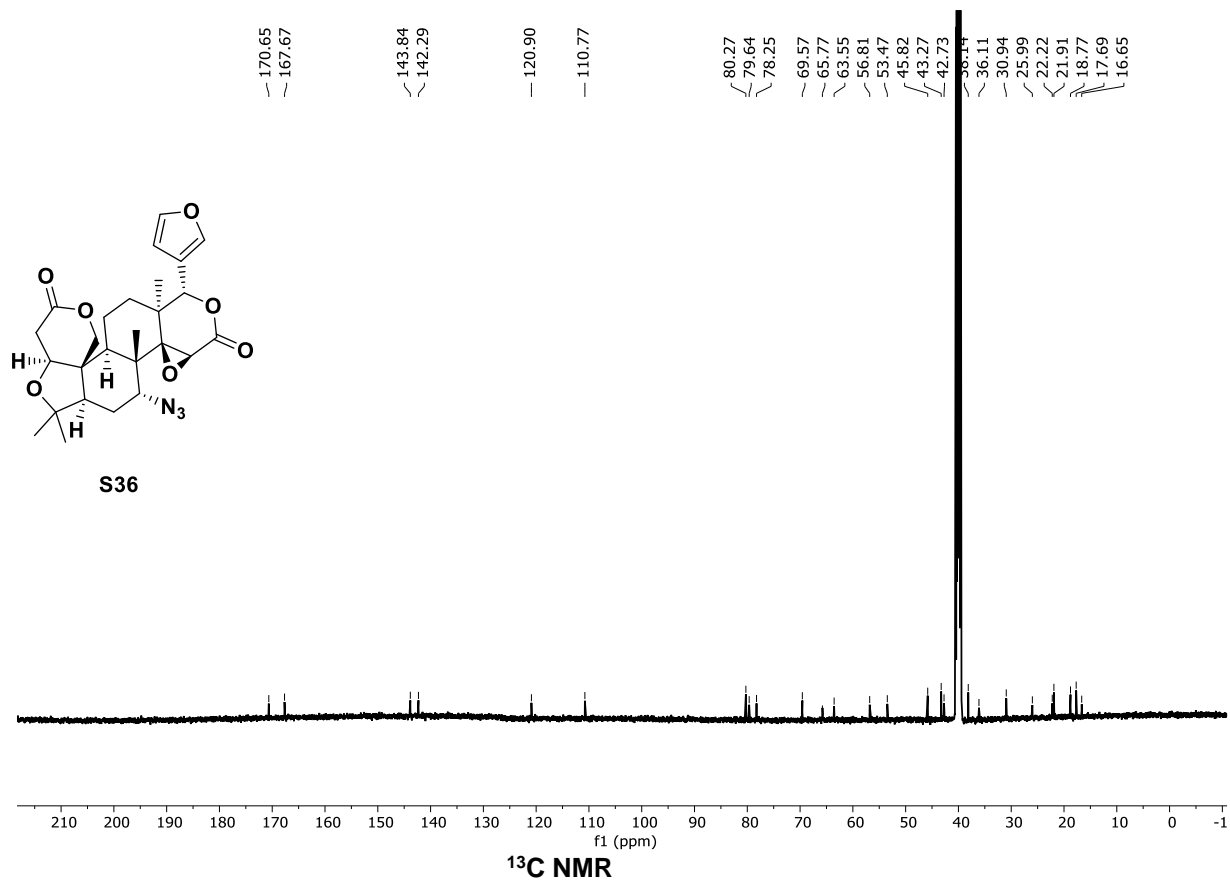



## SUPPORTING INFORMATION

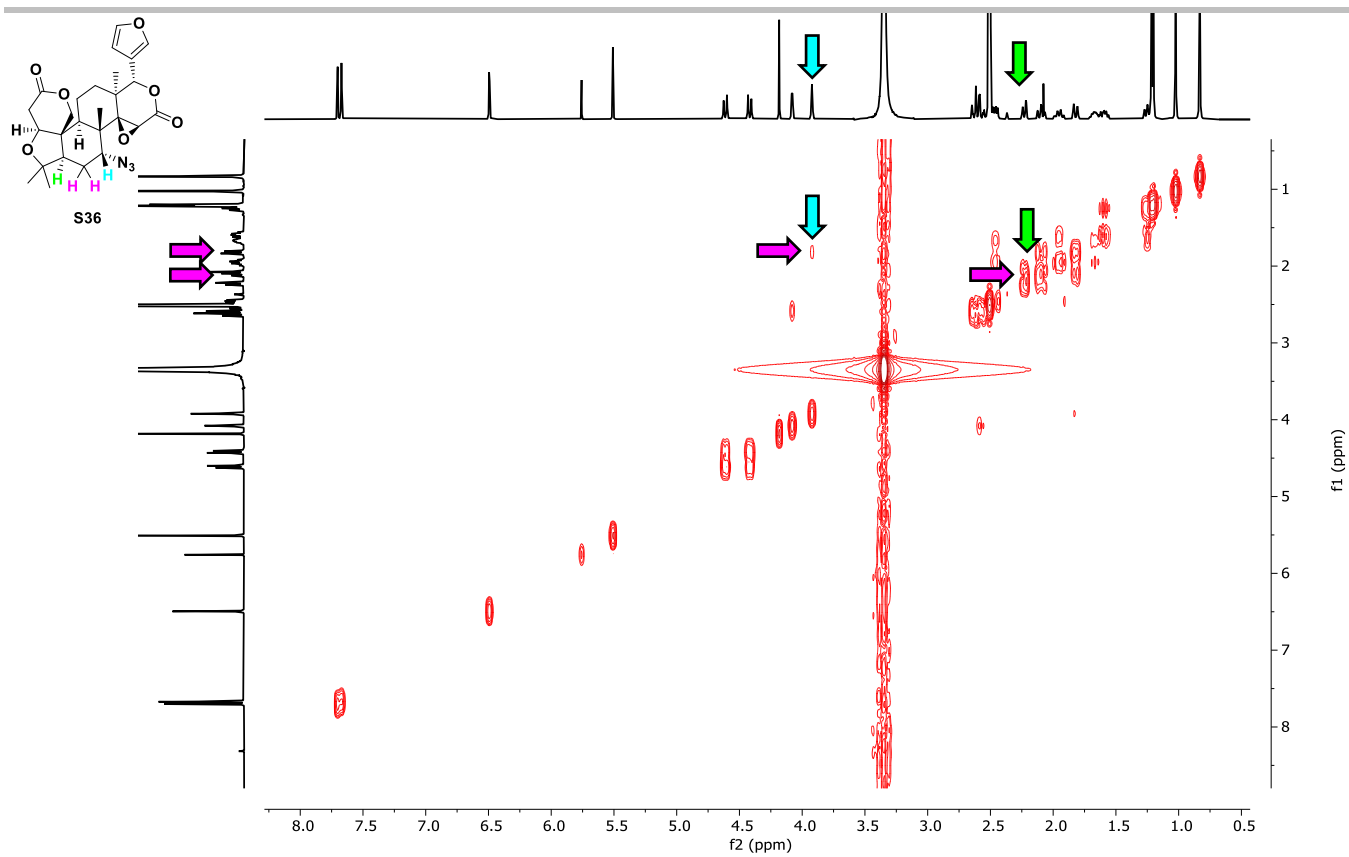 $^1\text{H}$ - $^1\text{H}$  COSY NMR

## SUPPORTING INFORMATION

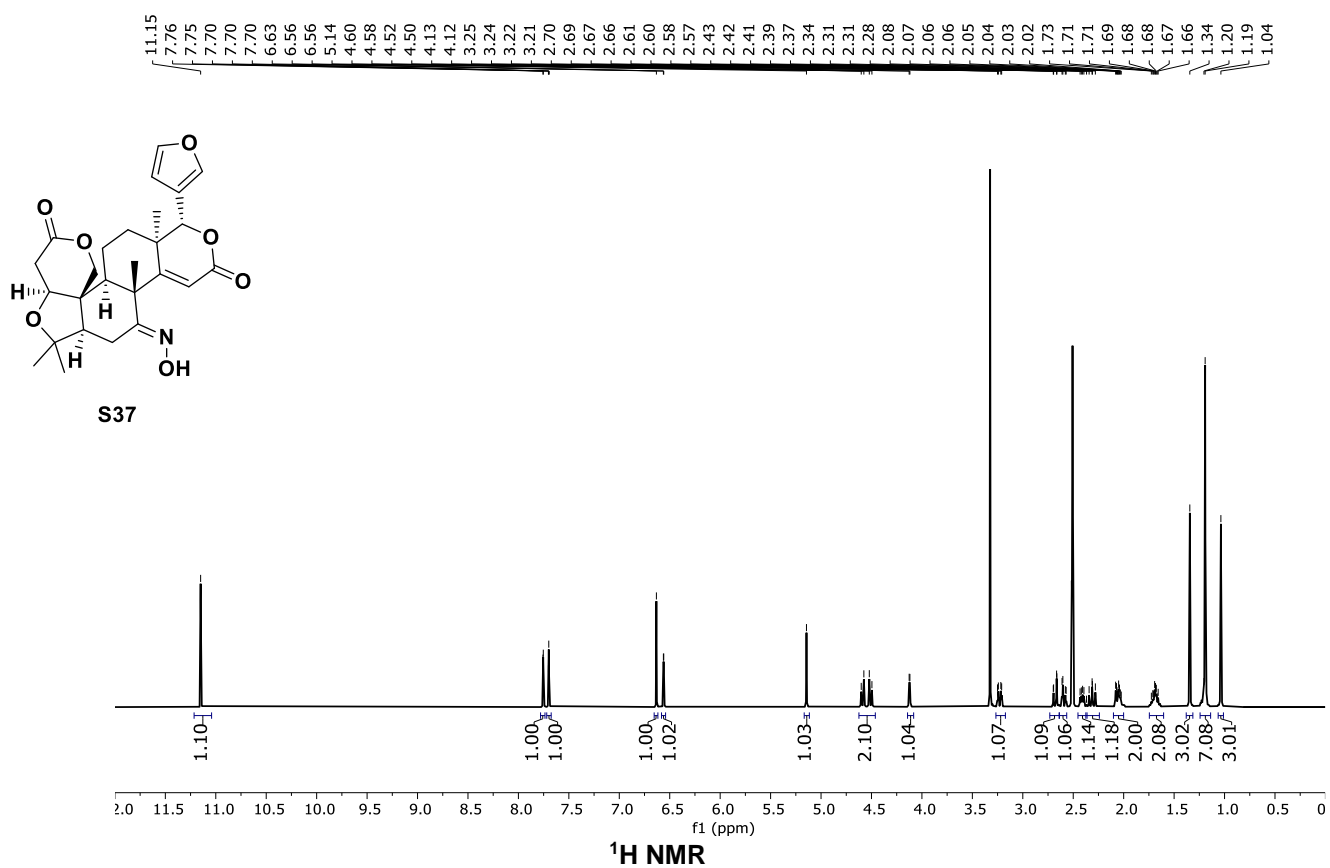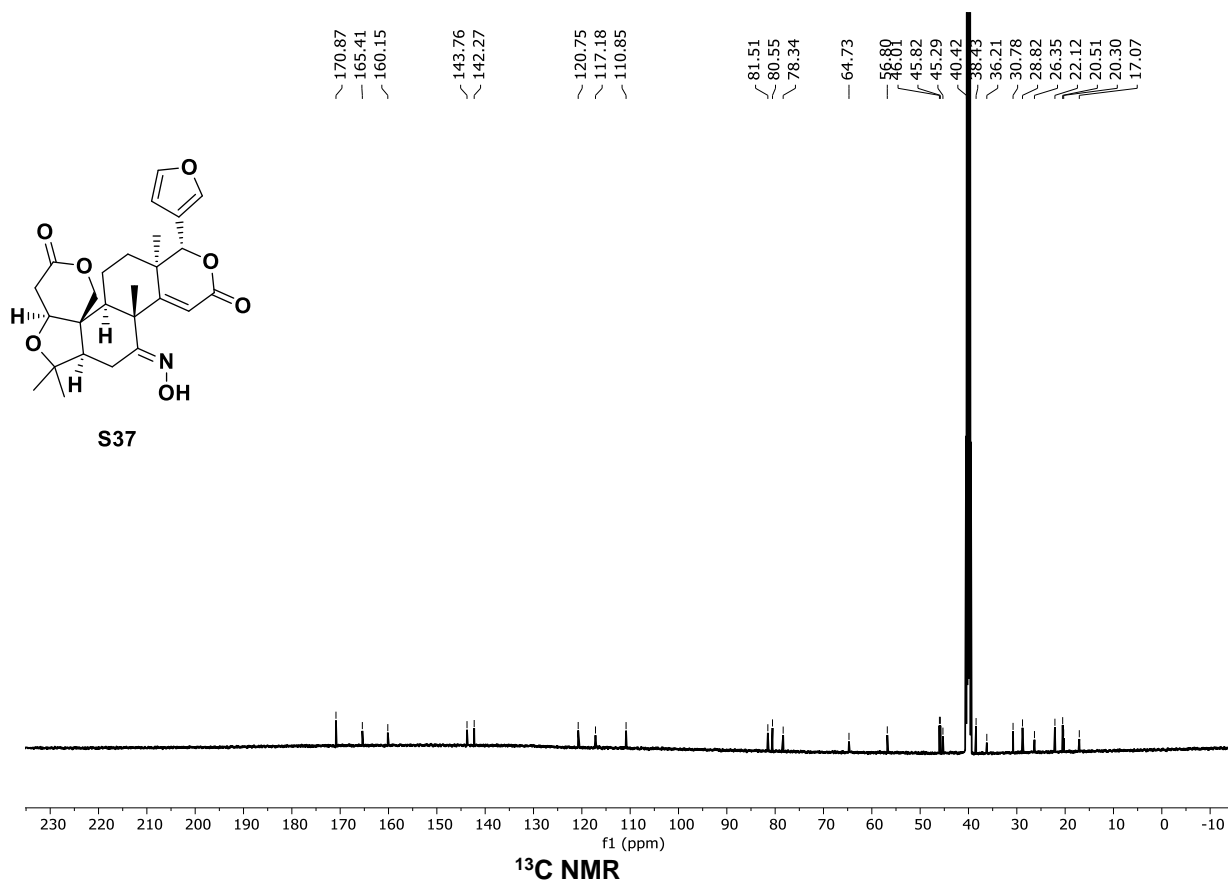

## SUPPORTING INFORMATION

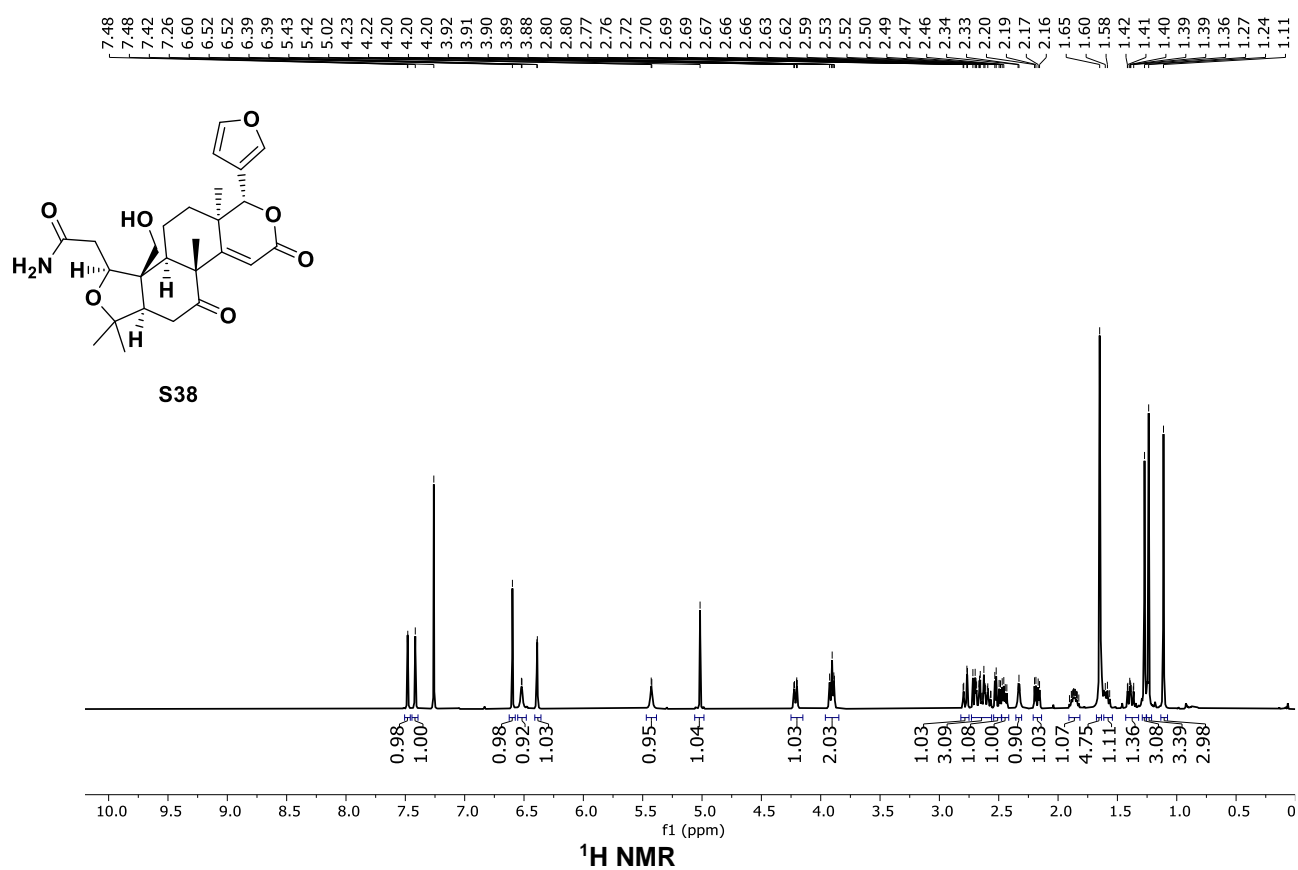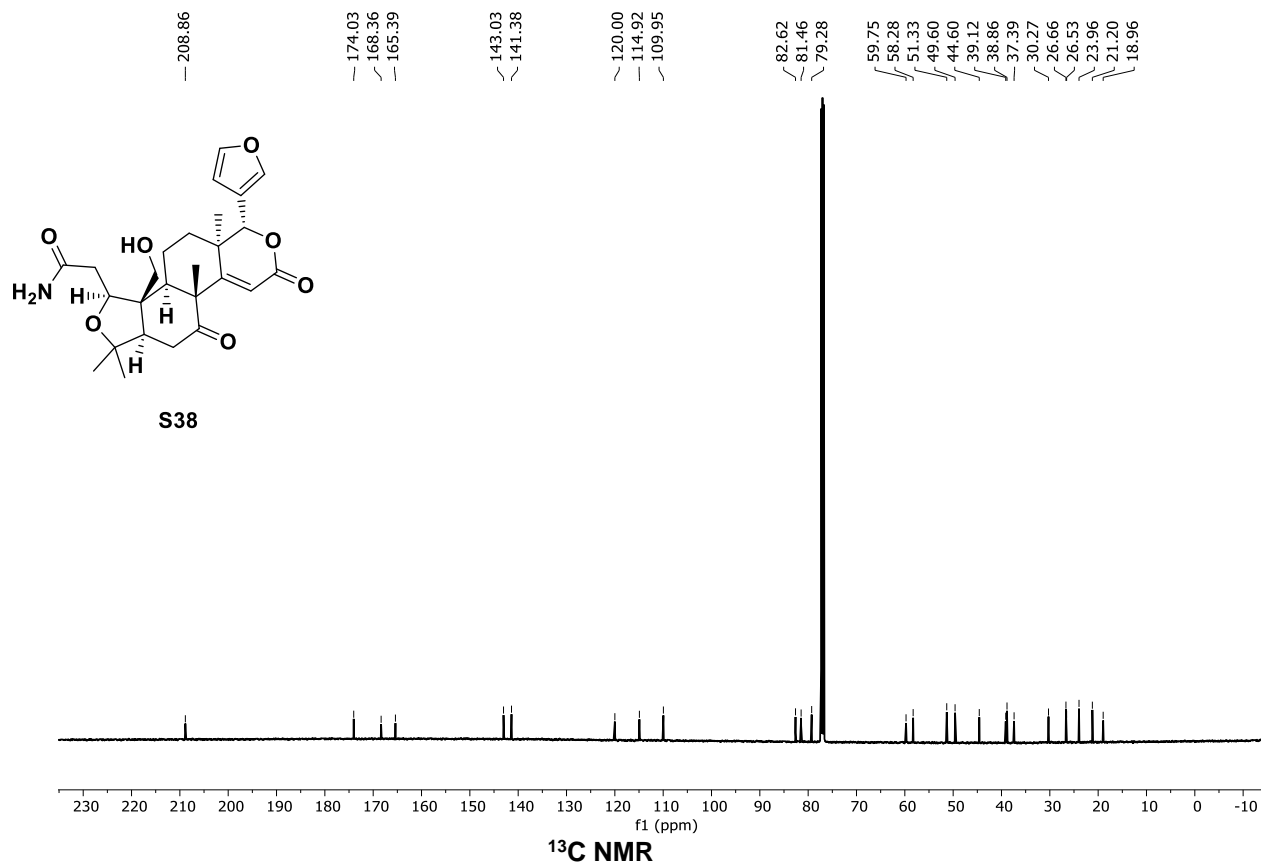

## SUPPORTING INFORMATION

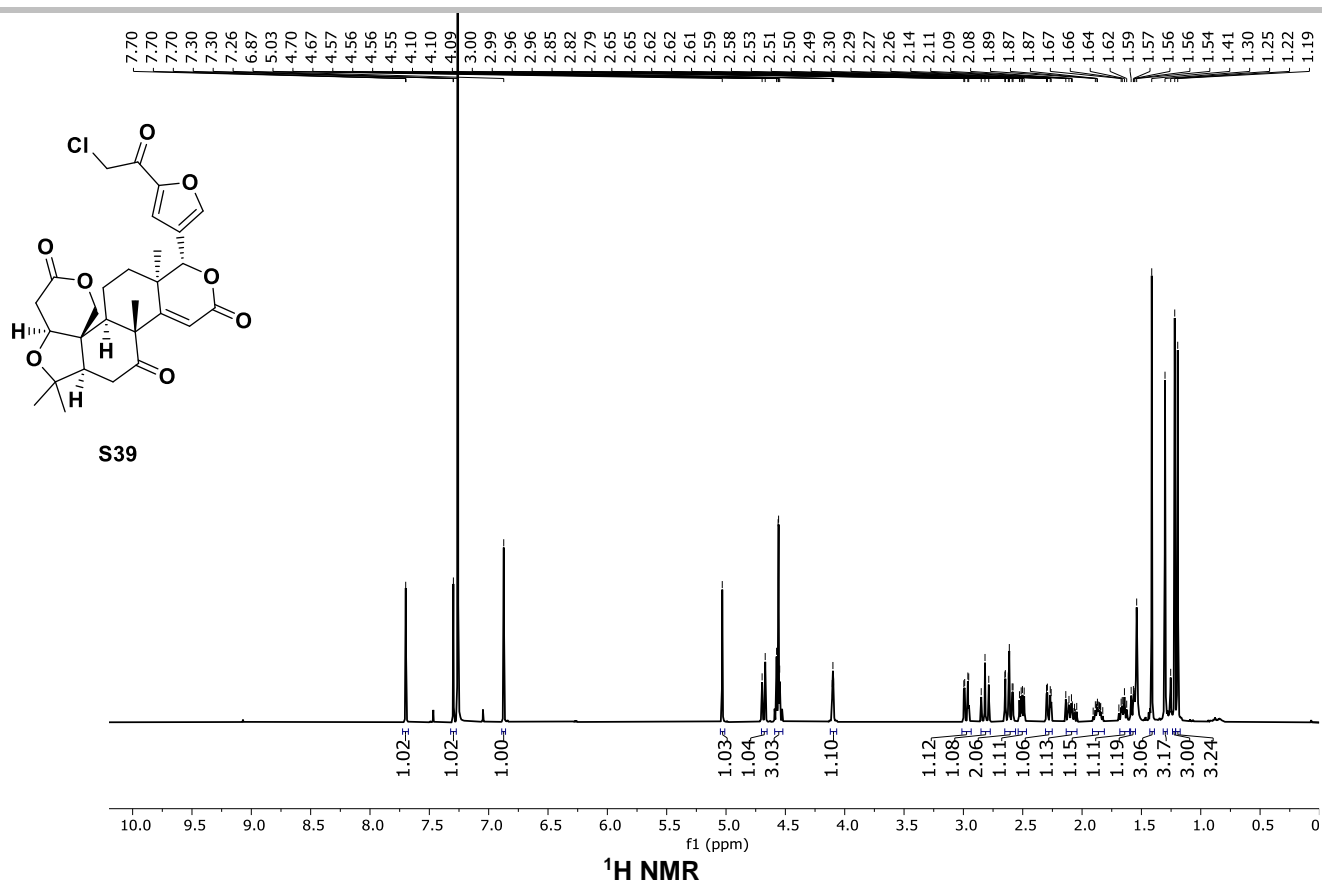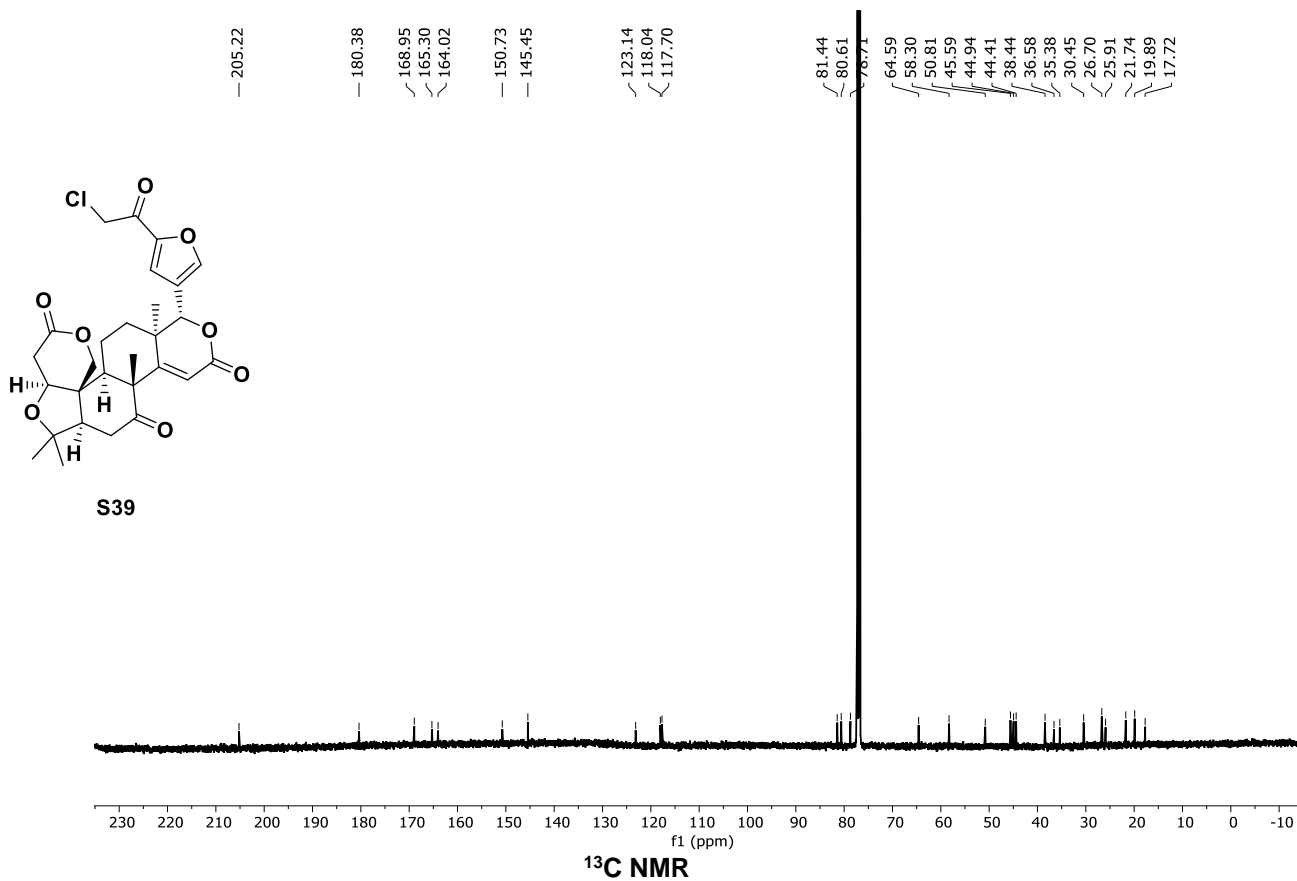

## SUPPORTING INFORMATION

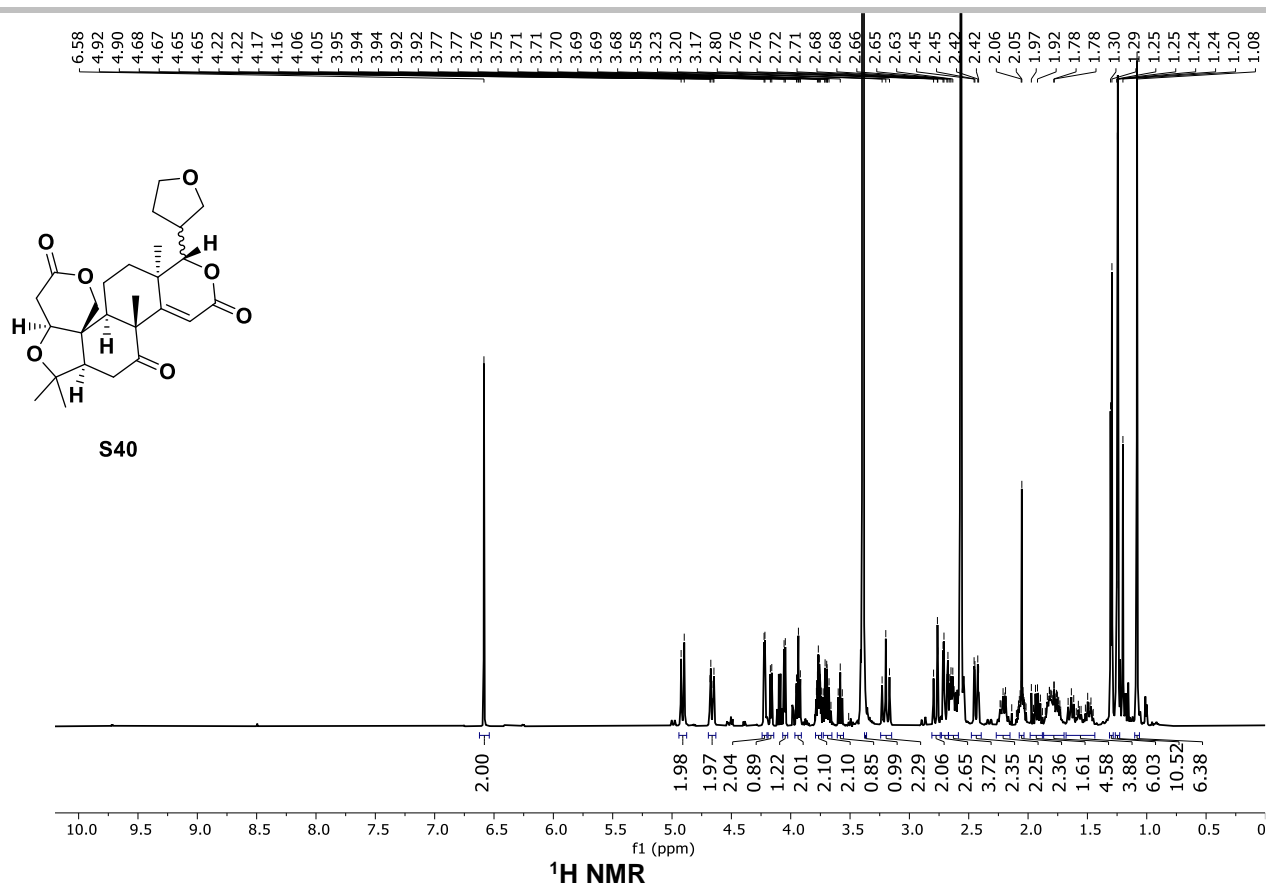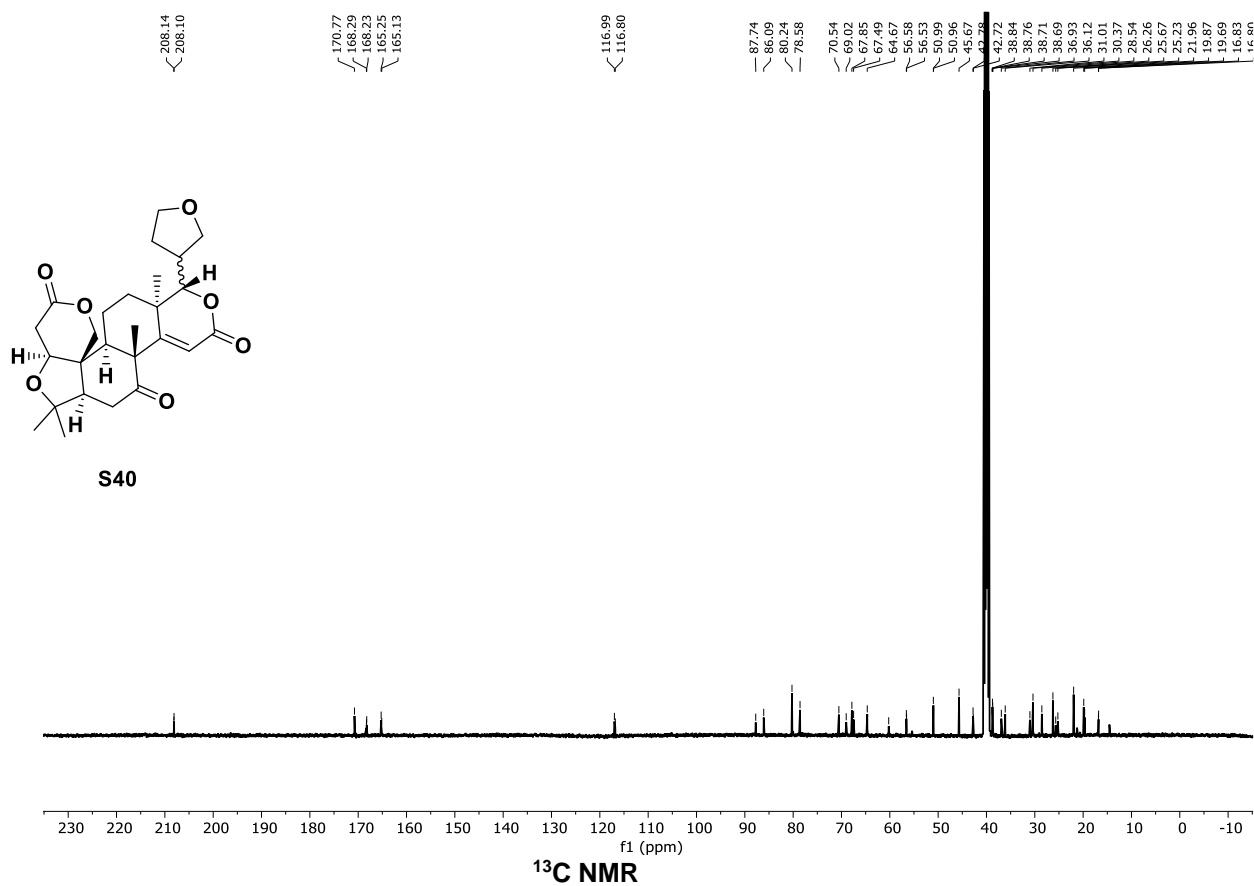

## SUPPORTING INFORMATION

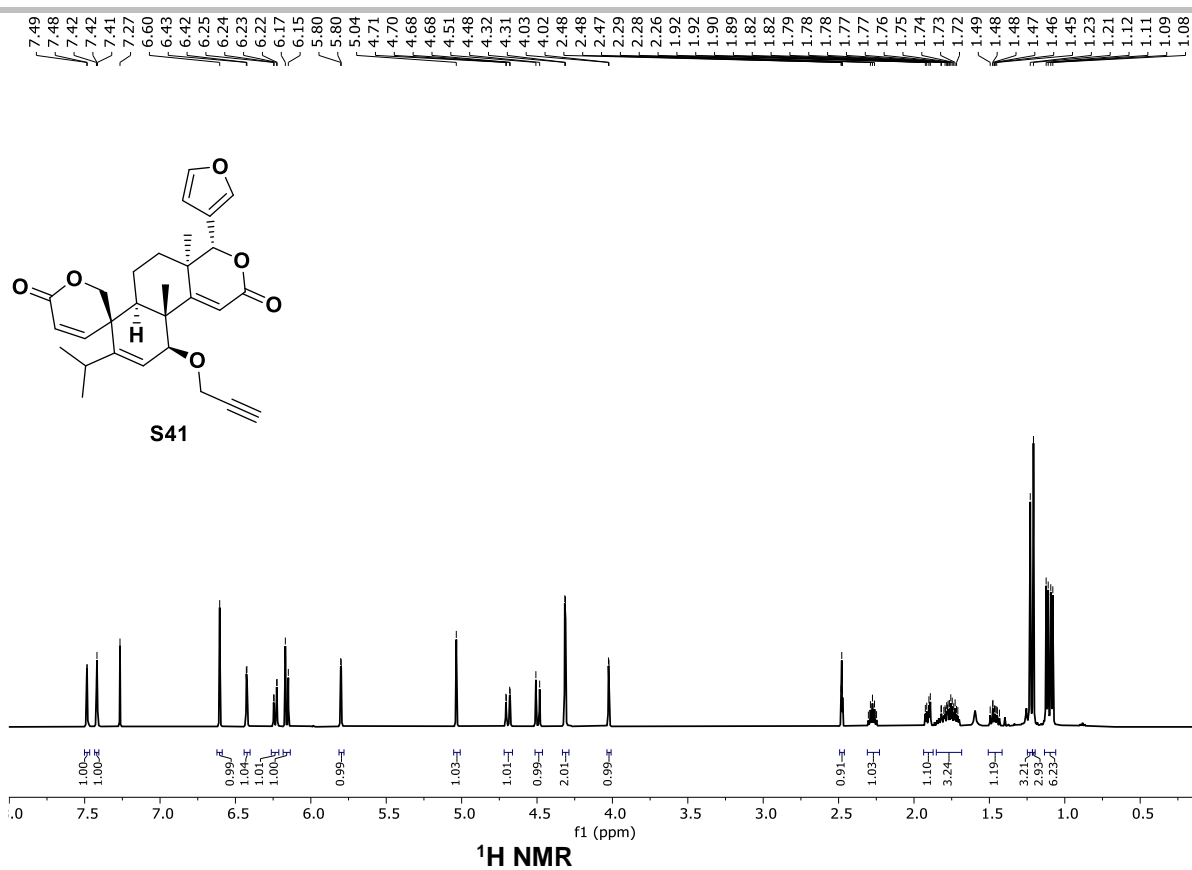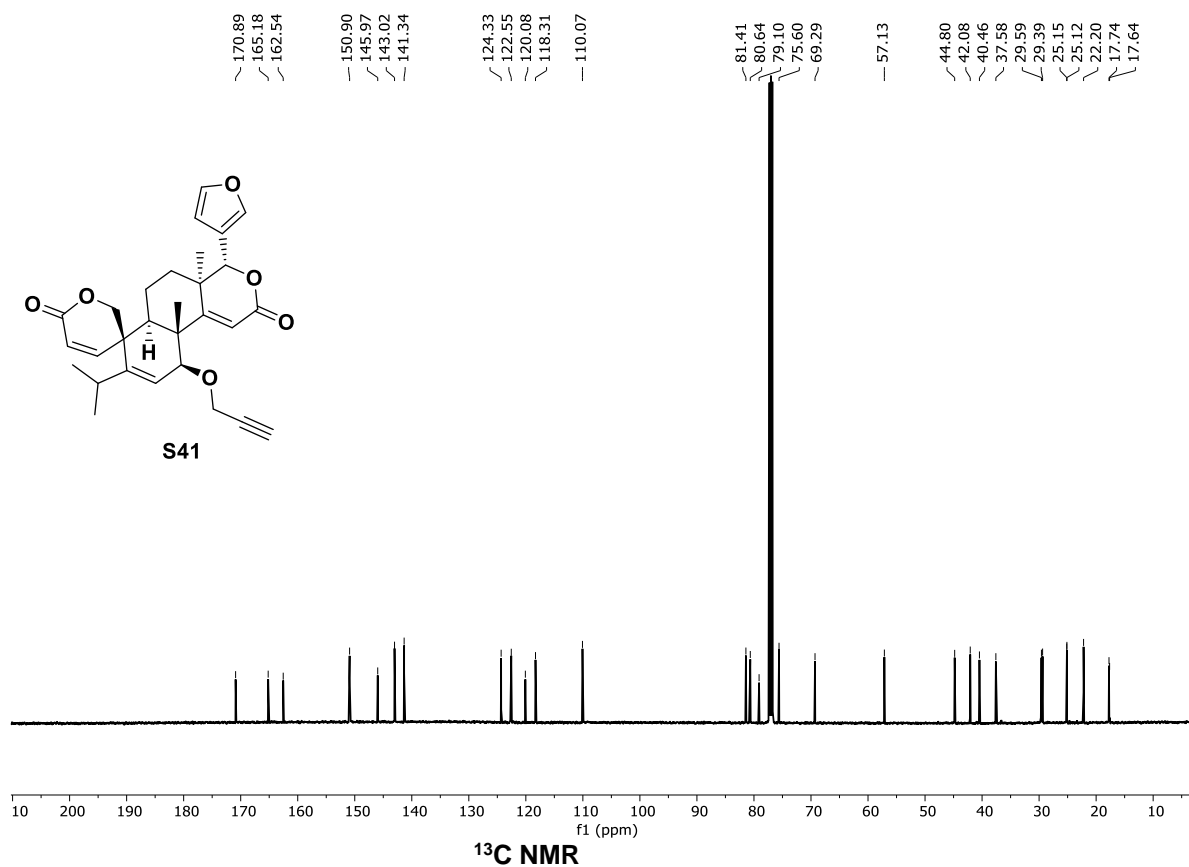

## SUPPORTING INFORMATION

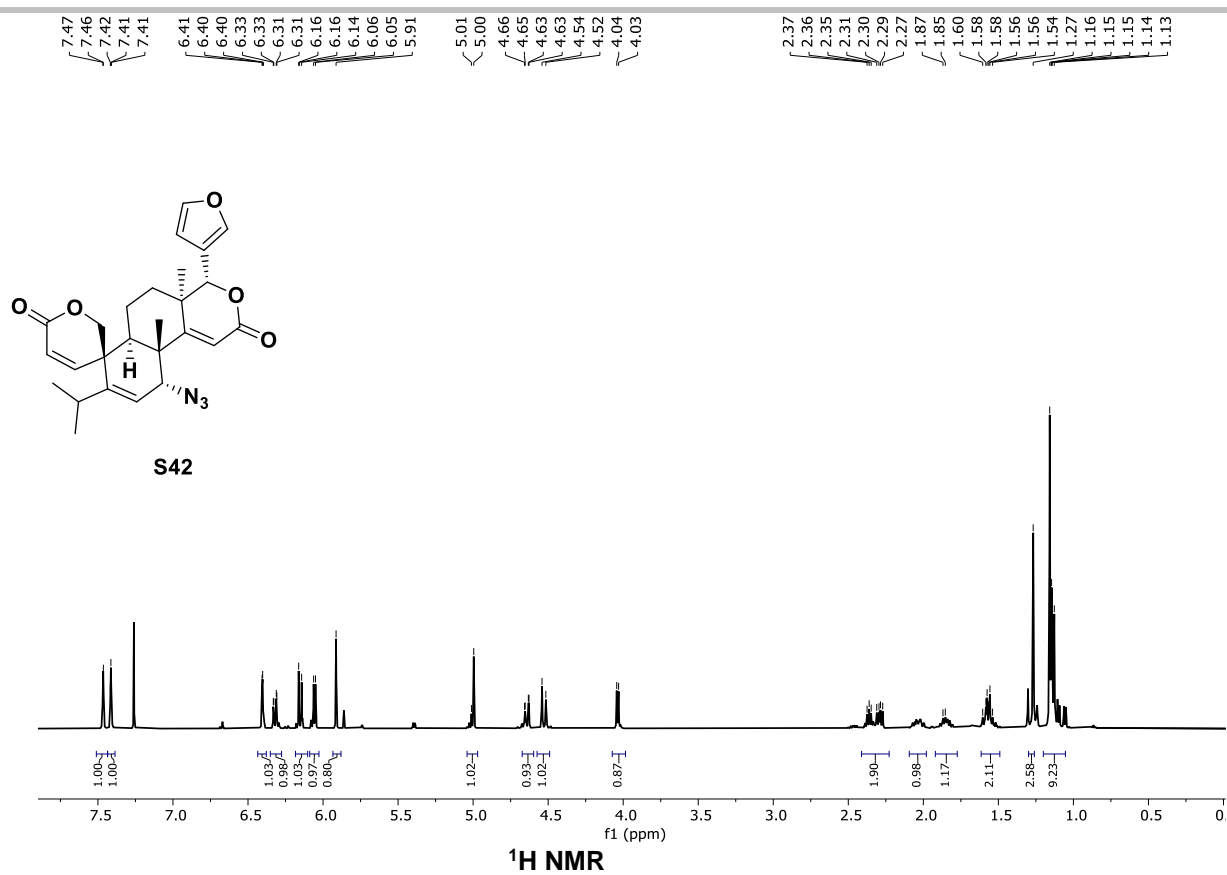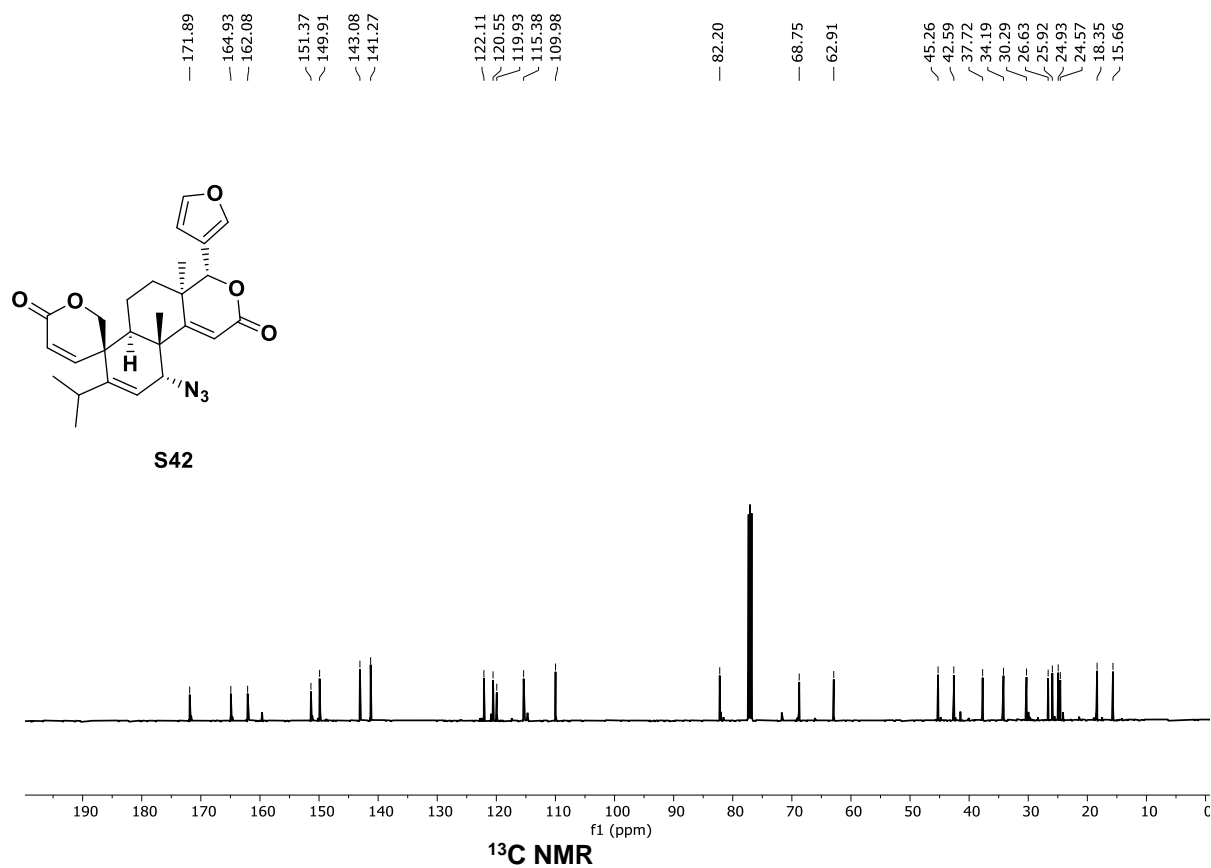

## SUPPORTING INFORMATION

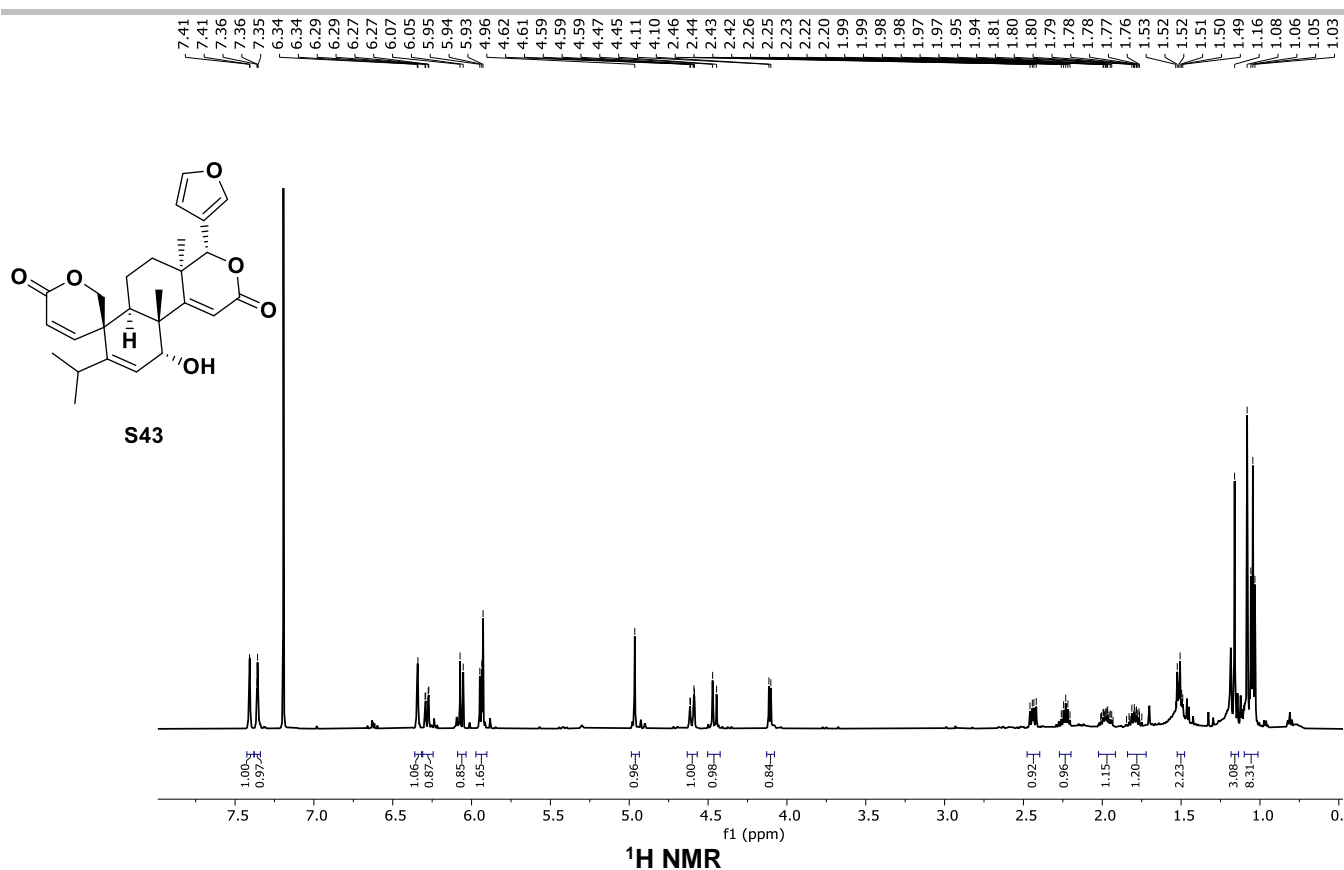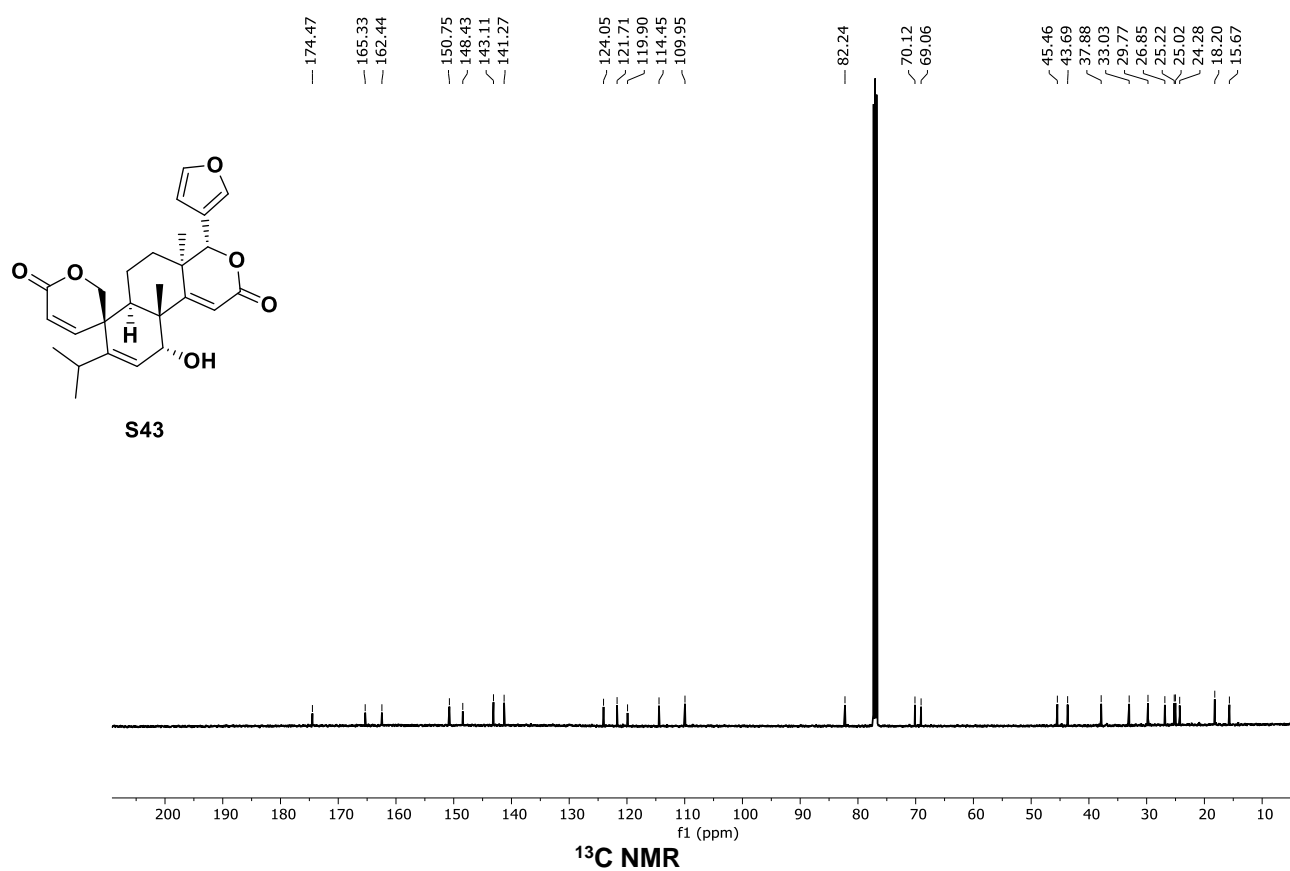



## SUPPORTING INFORMATION

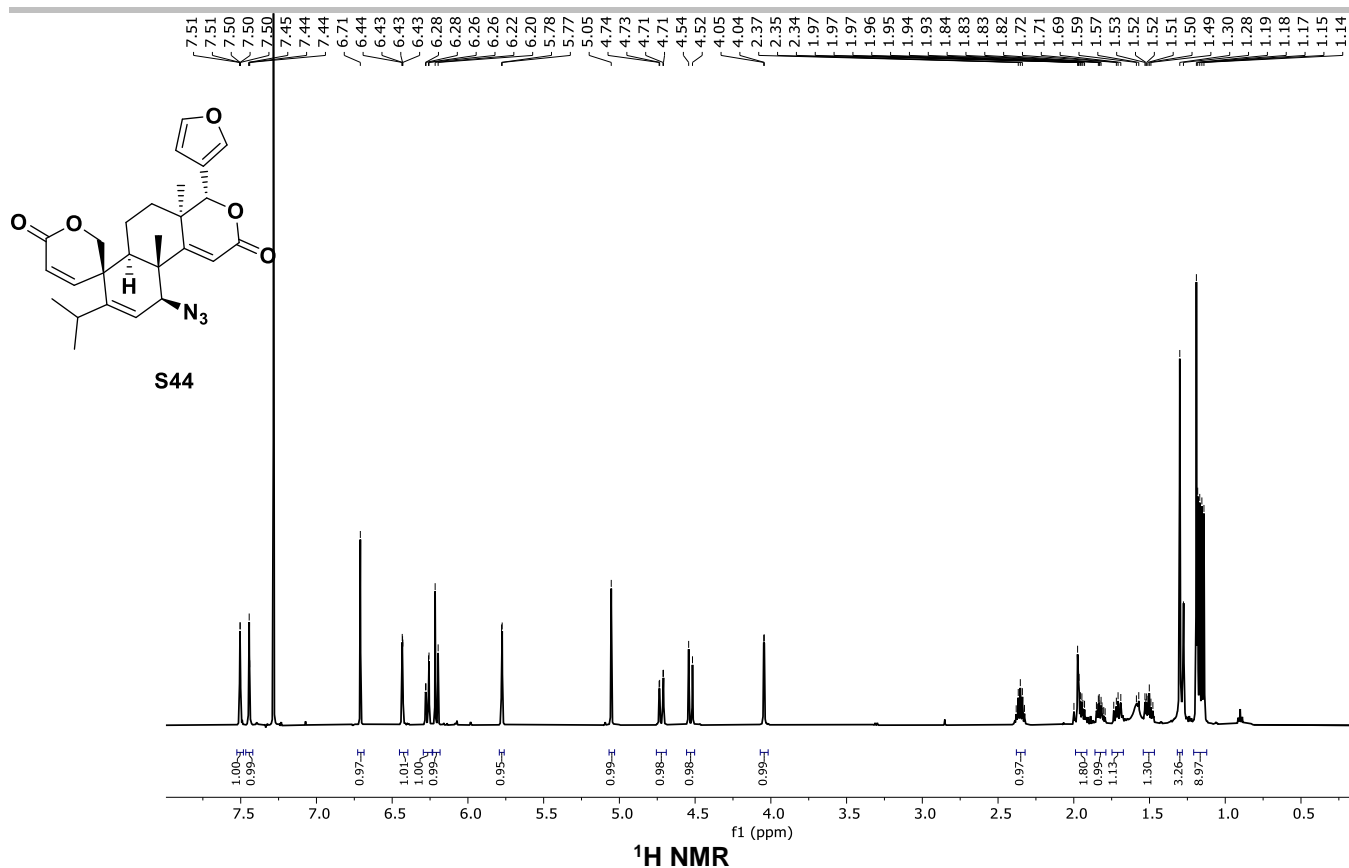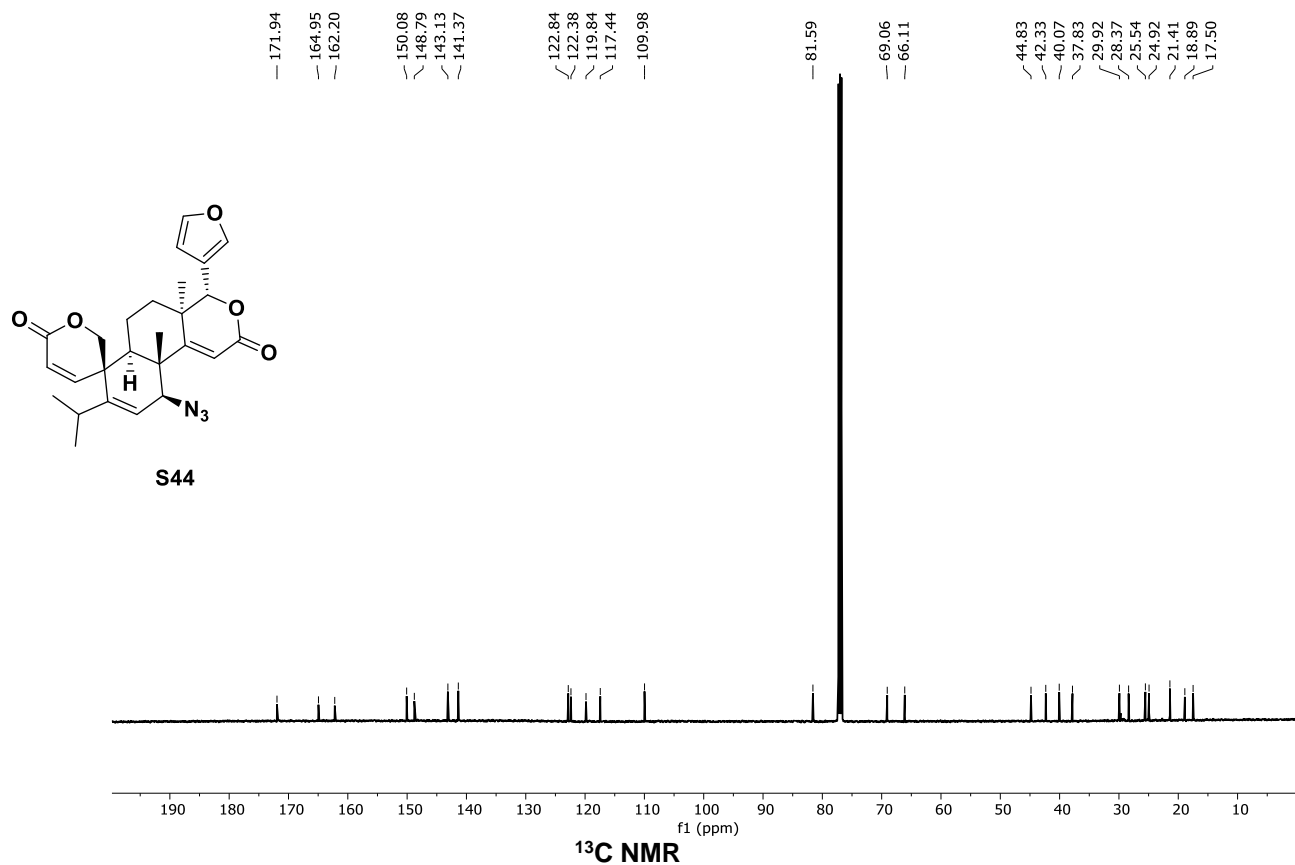

## SUPPORTING INFORMATION

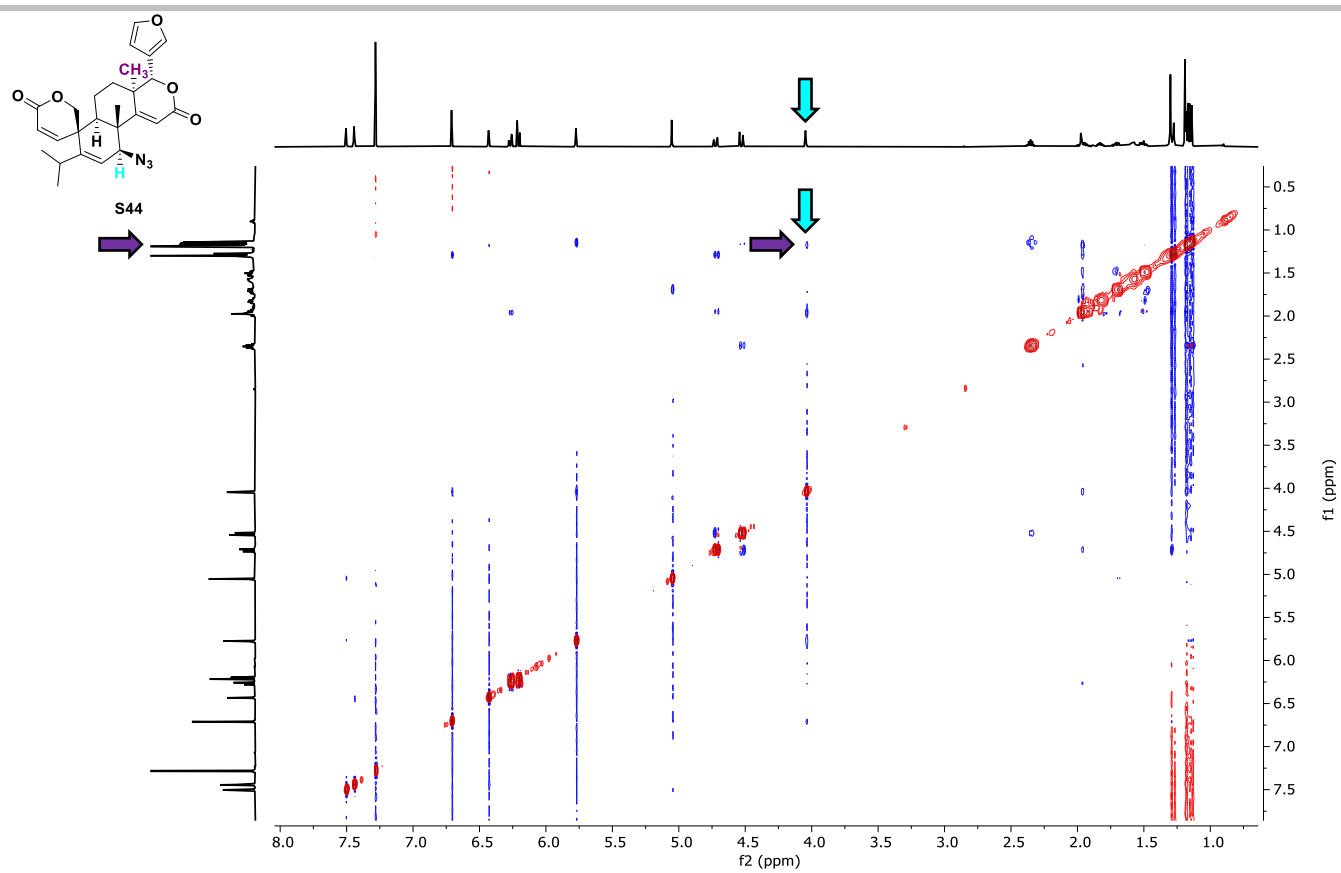<sup>1</sup>H-<sup>1</sup>H 2D NOESY NMR

## SUPPORTING INFORMATION

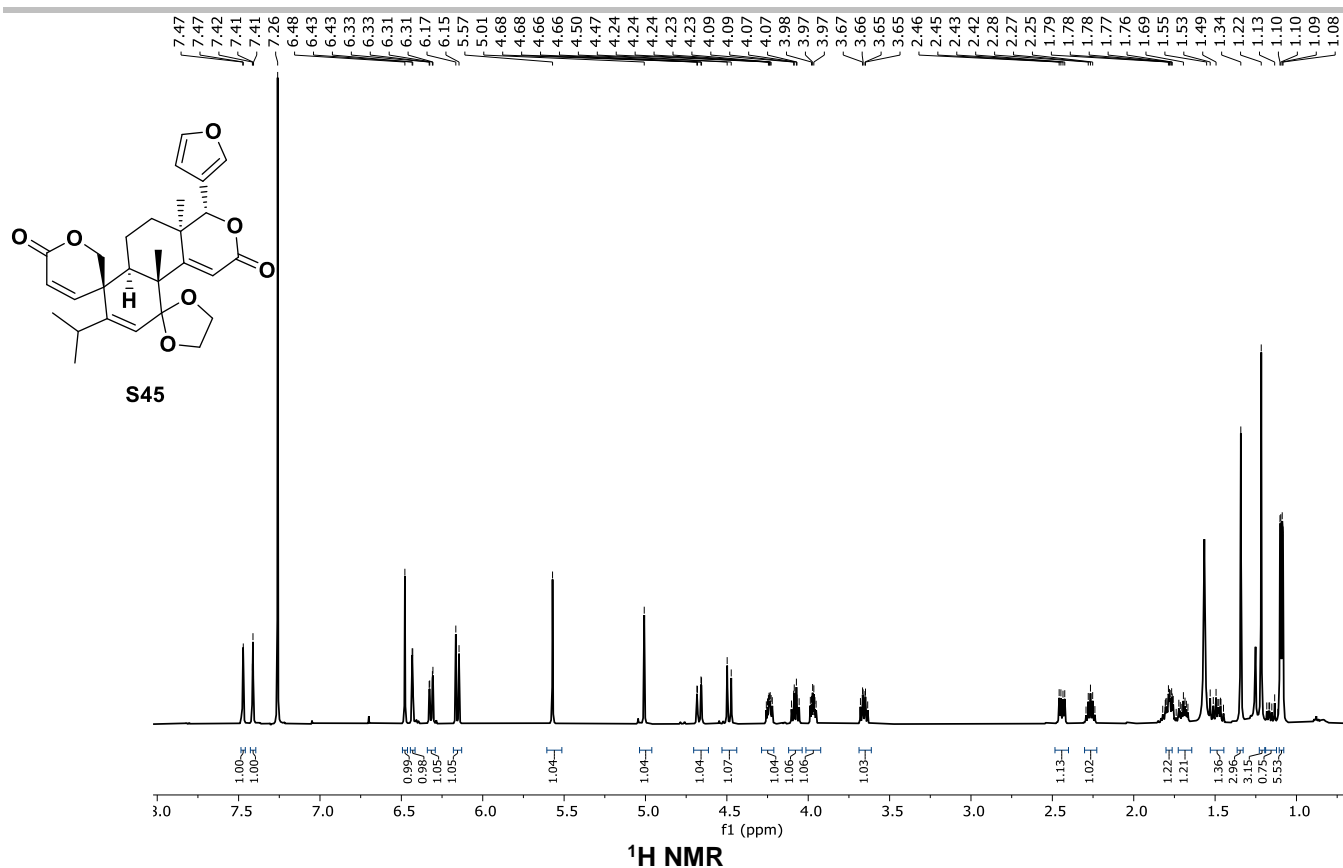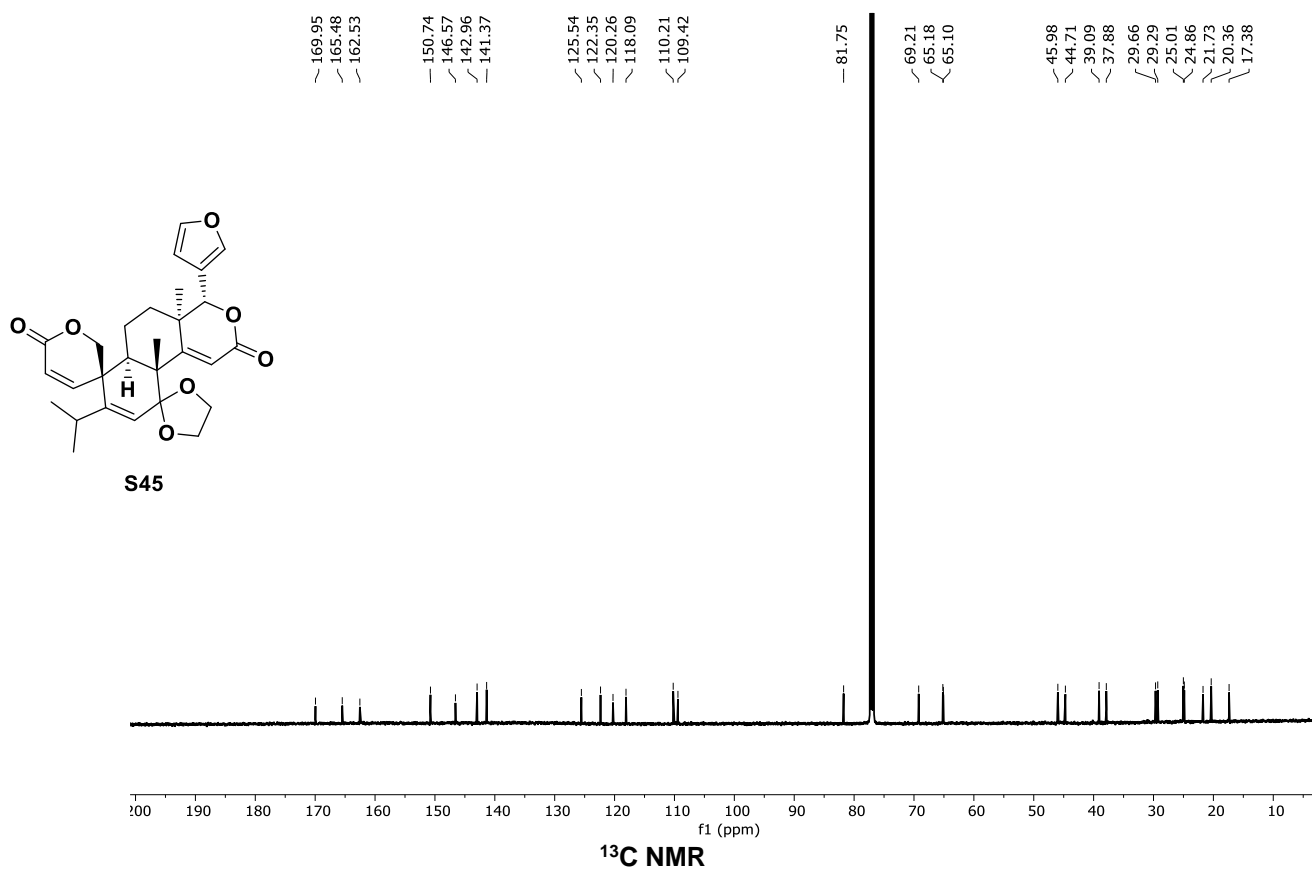

## SUPPORTING INFORMATION

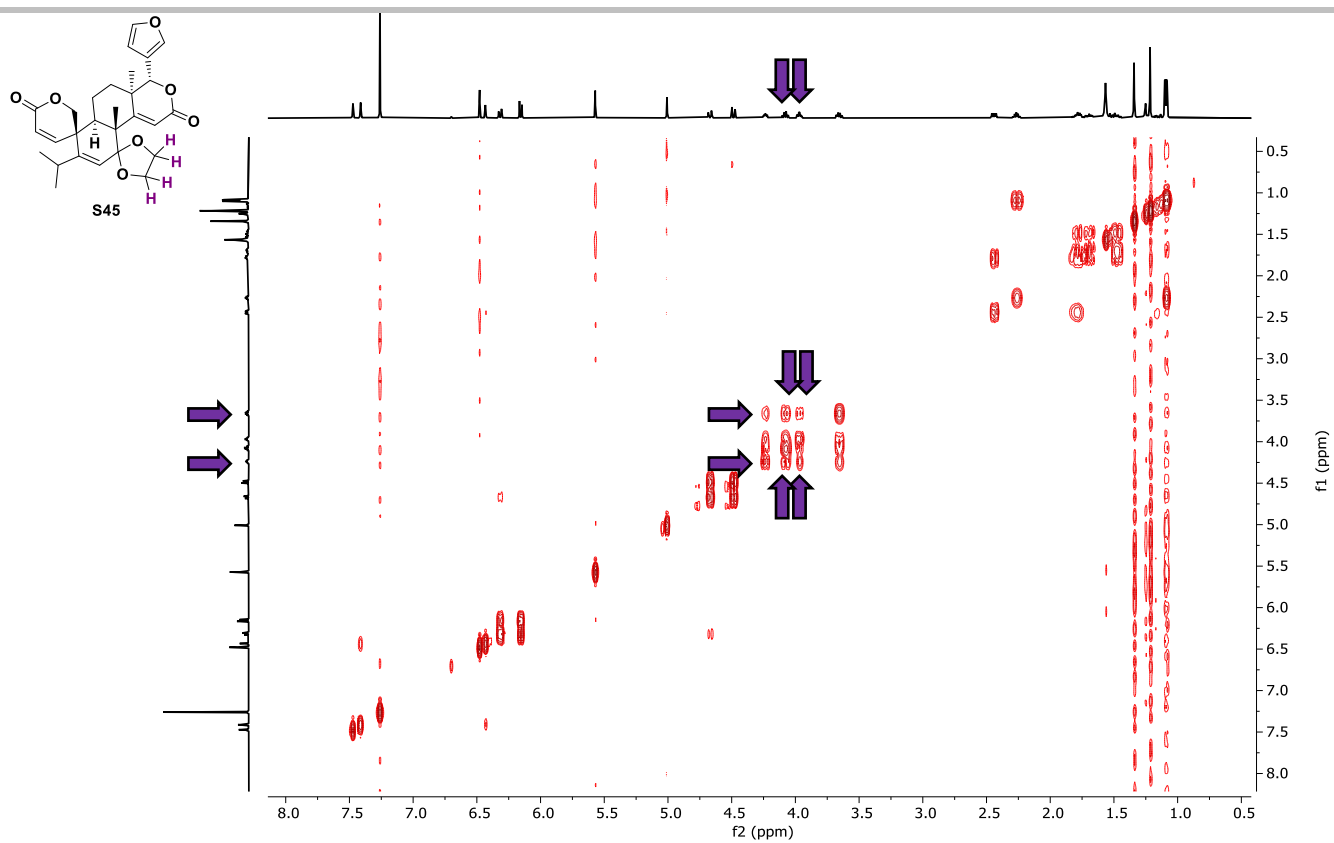

## SUPPORTING INFORMATION

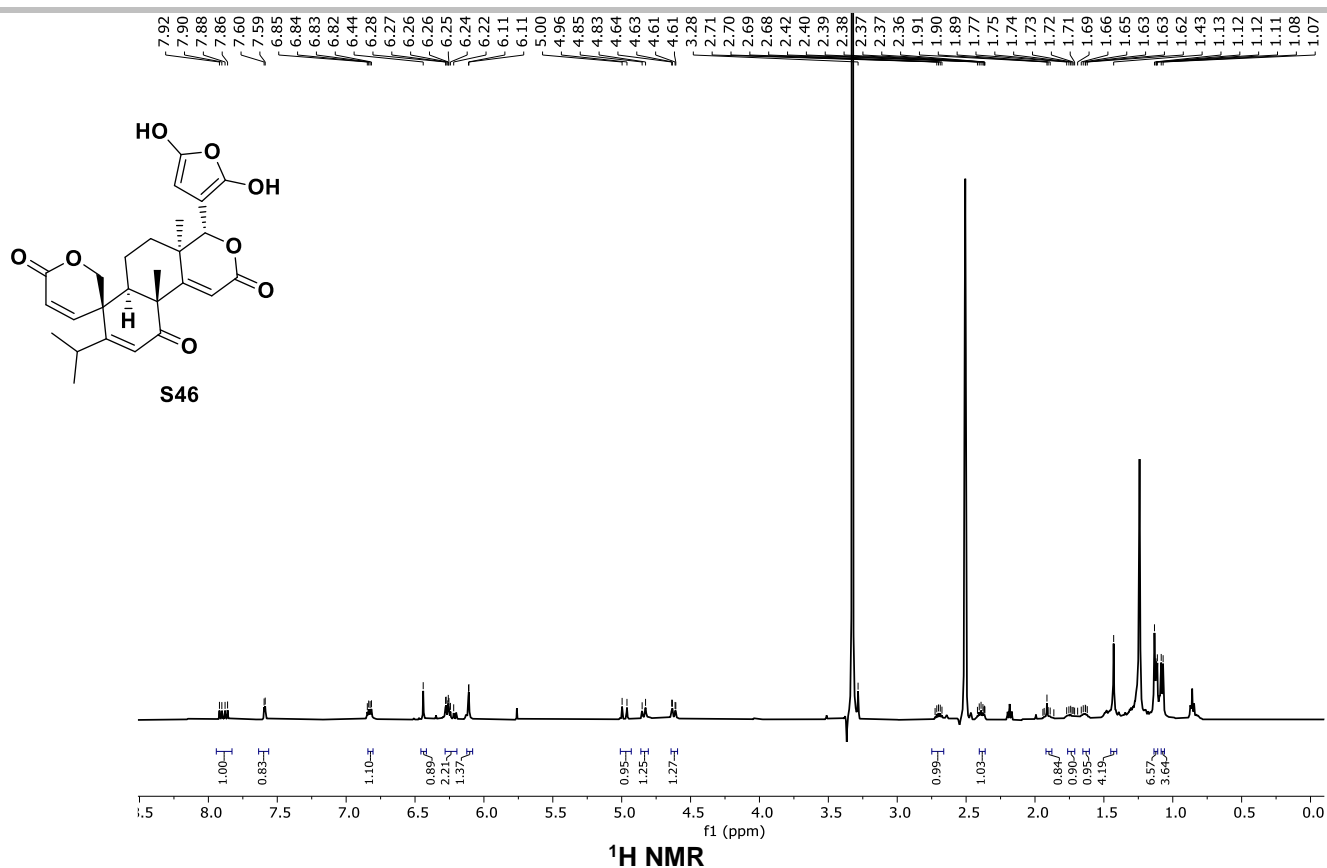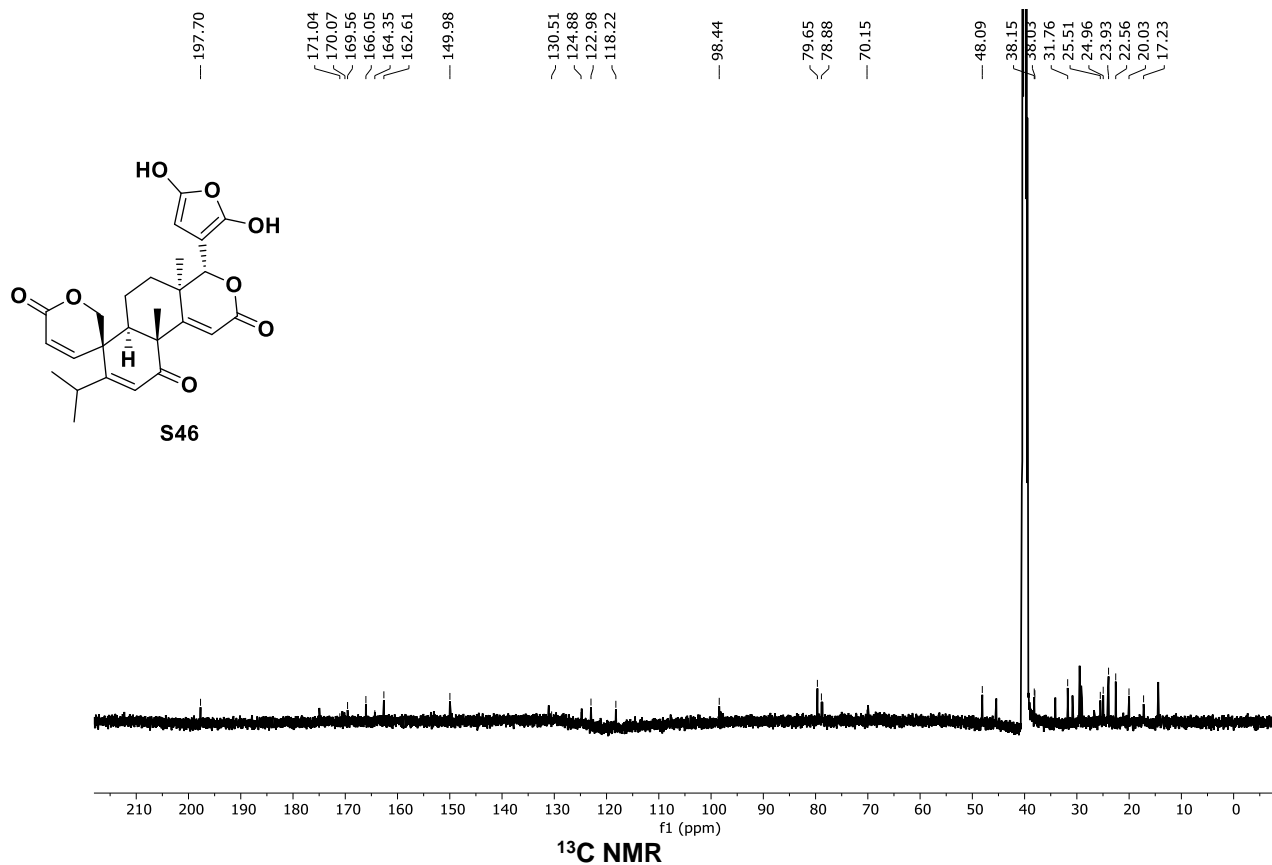

## SUPPORTING INFORMATION

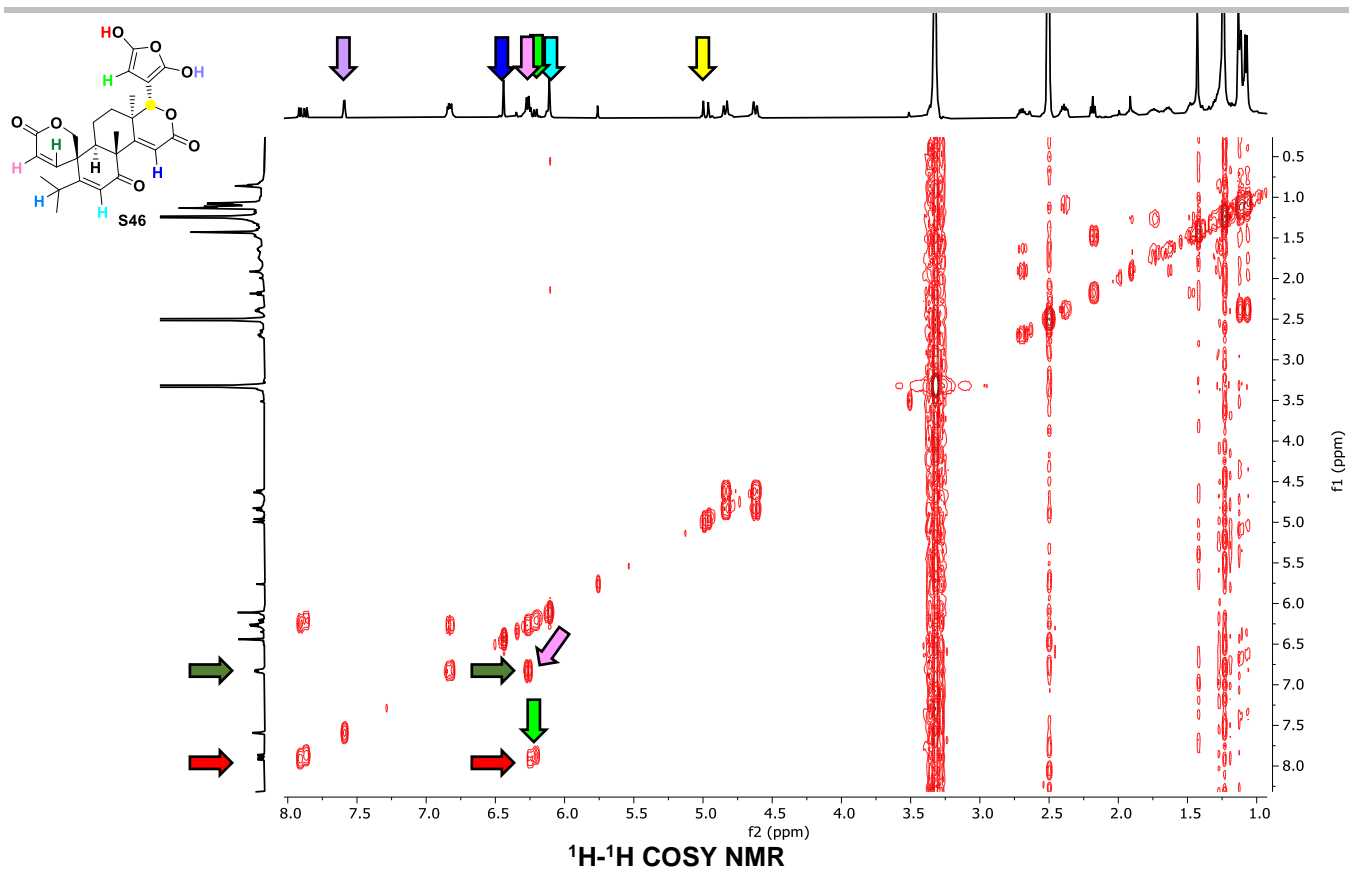

## SUPPORTING INFORMATION

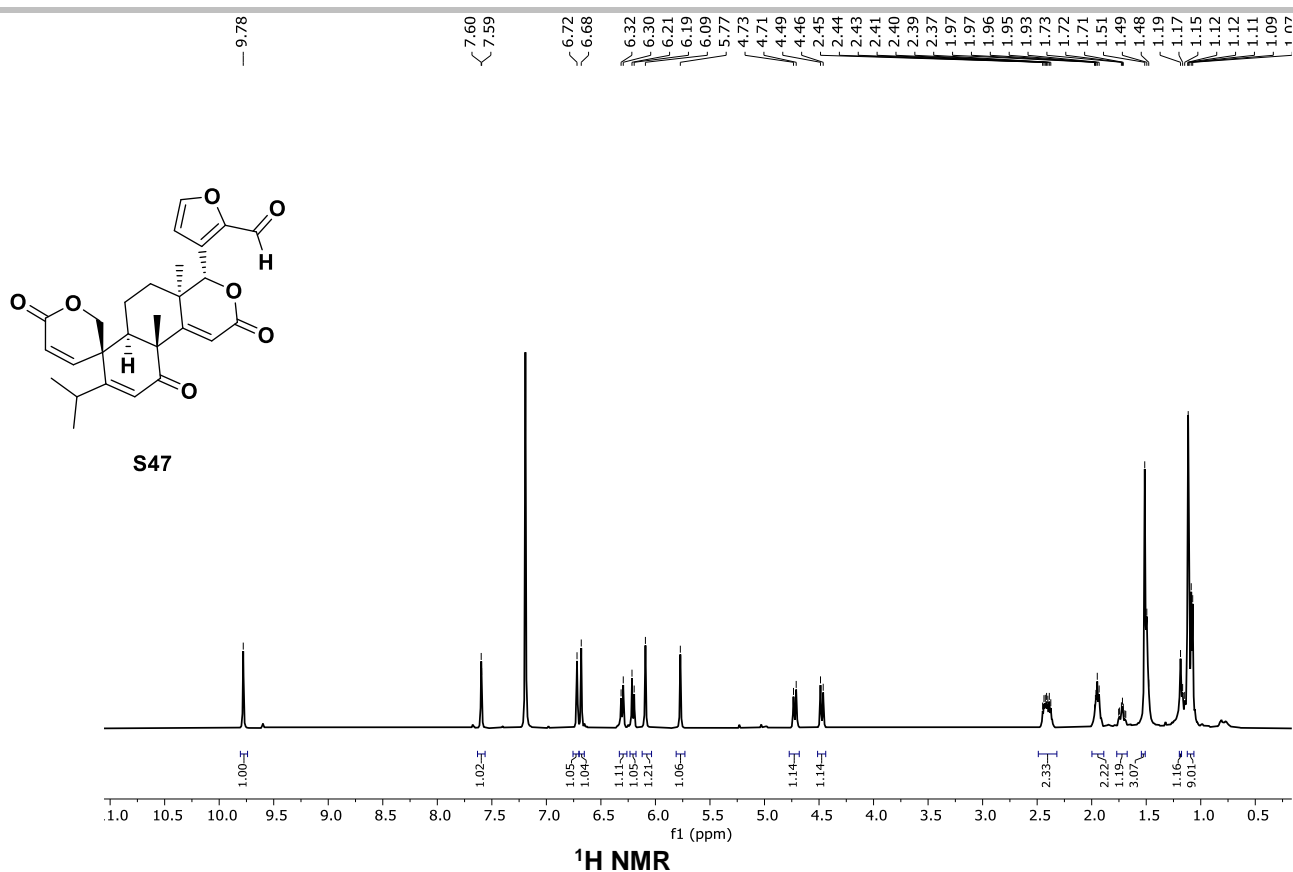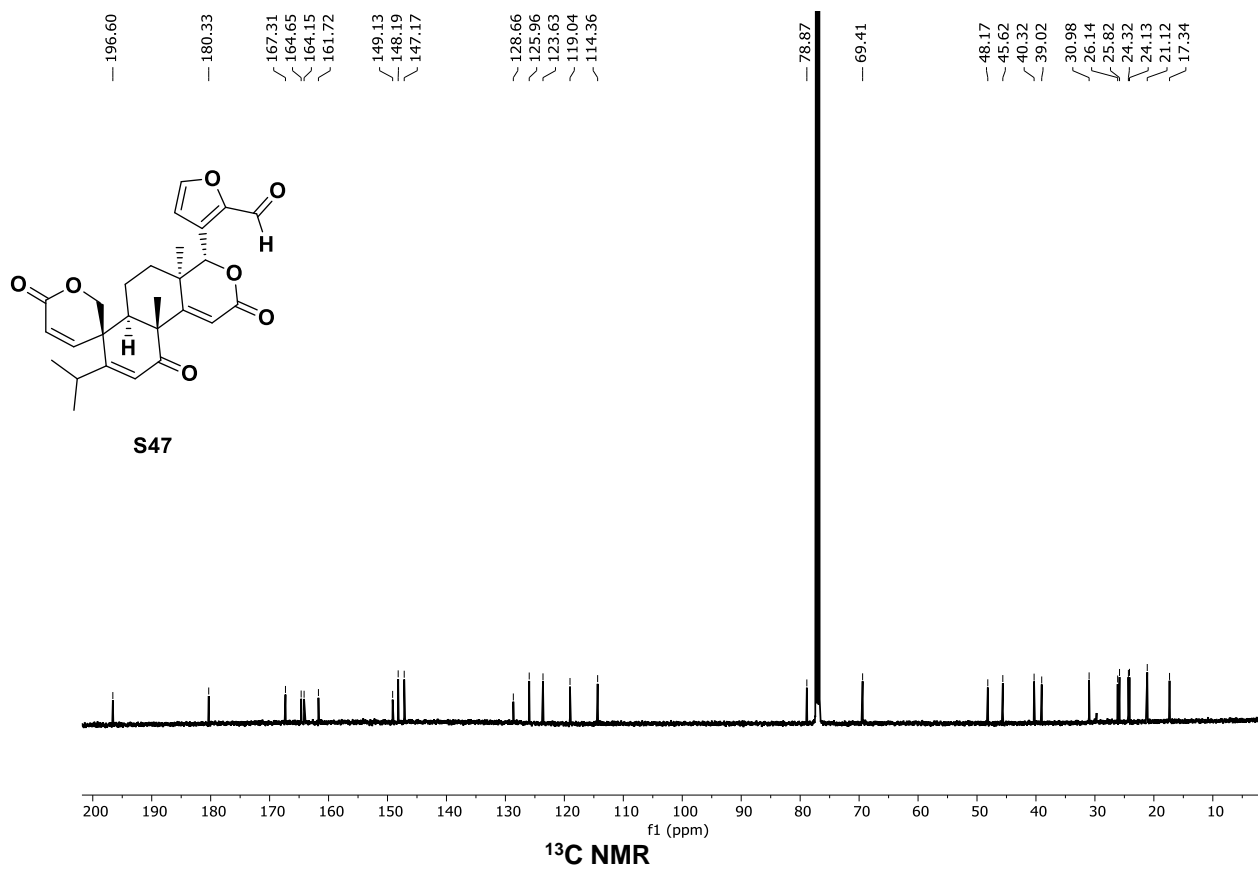

## SUPPORTING INFORMATION

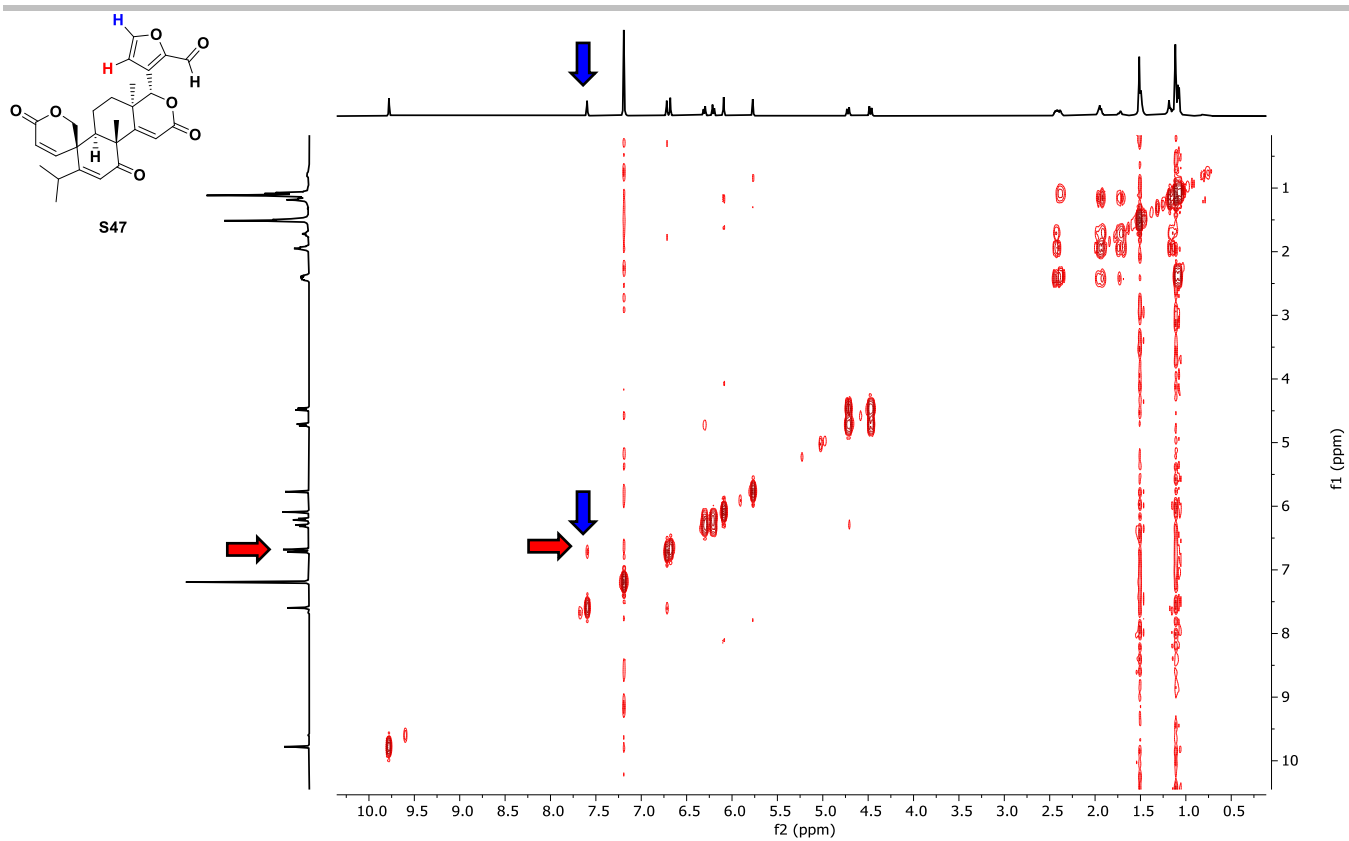



## SUPPORTING INFORMATION

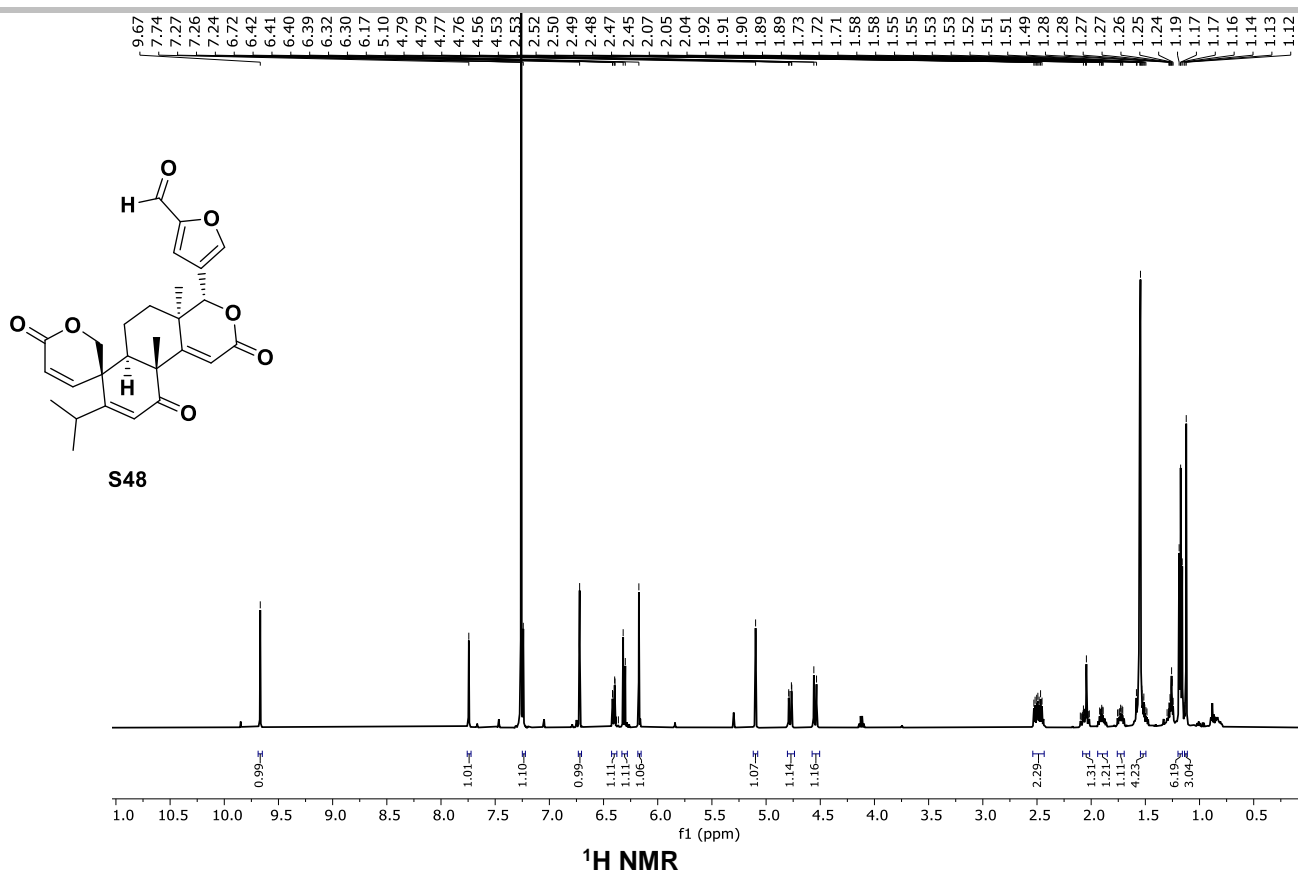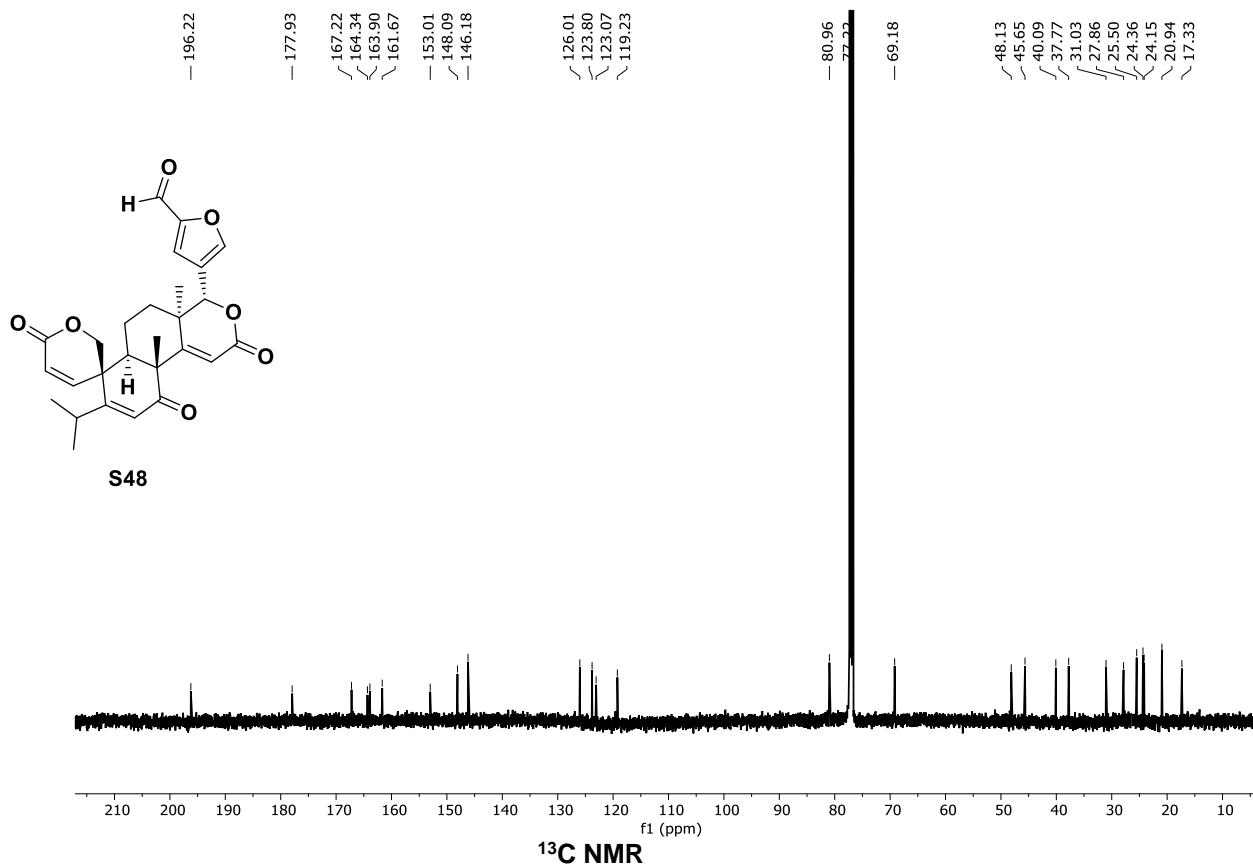

## SUPPORTING INFORMATION

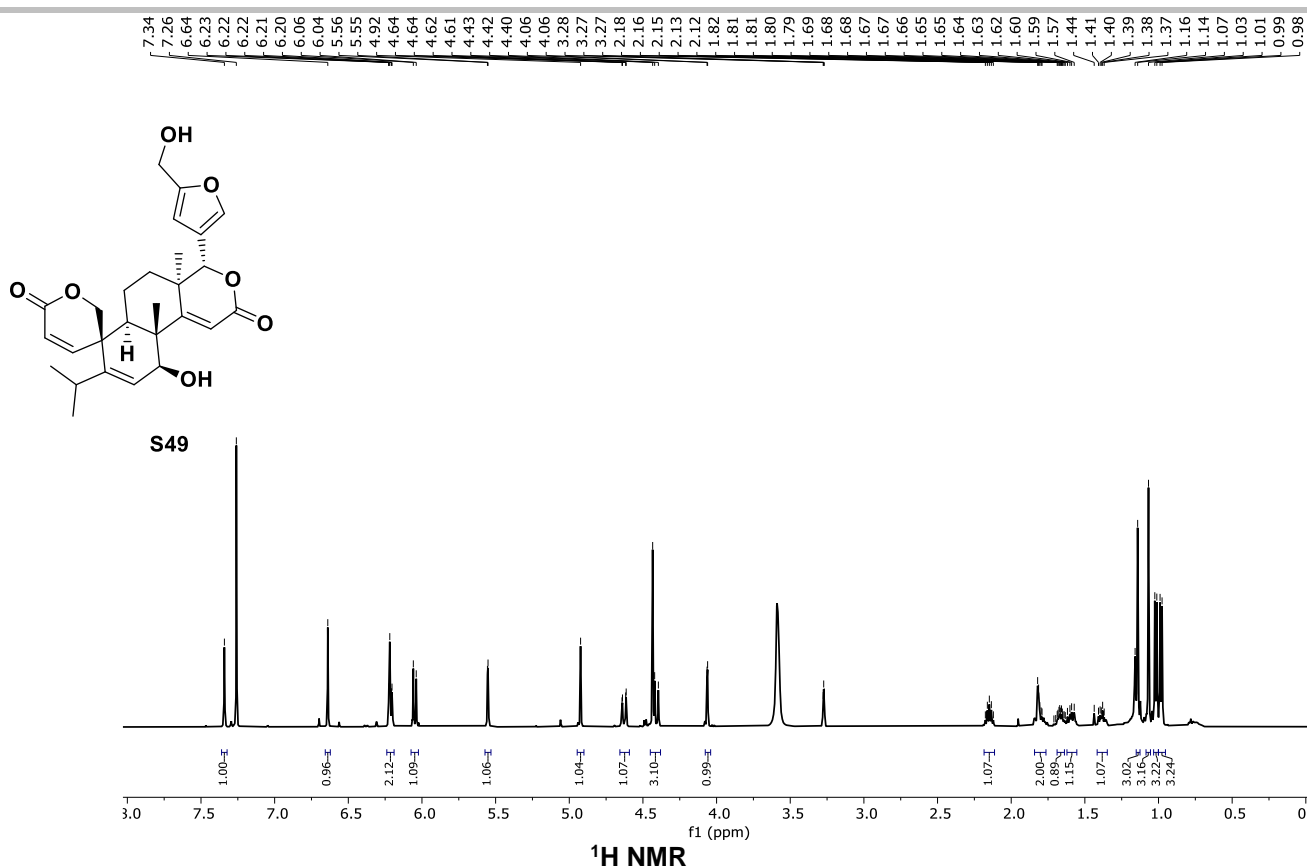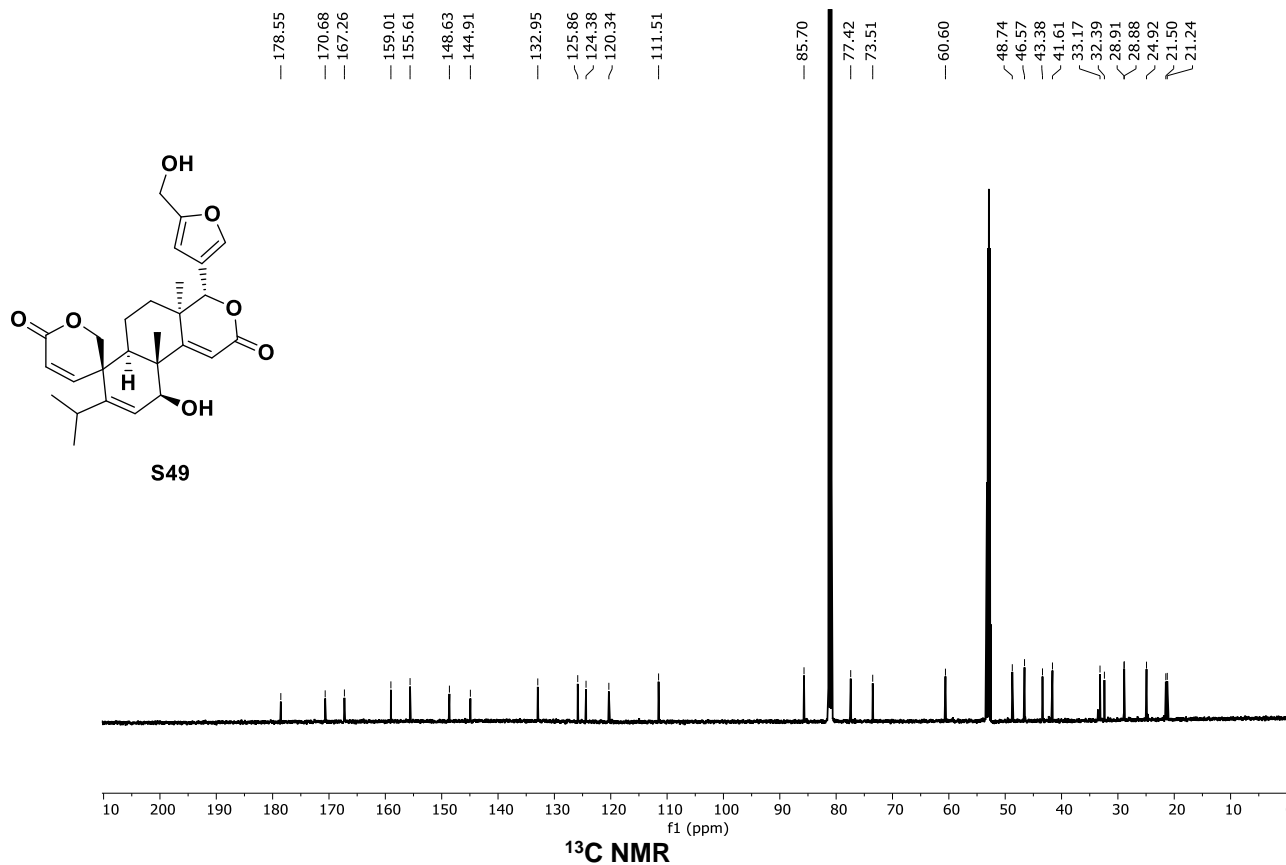

## SUPPORTING INFORMATION

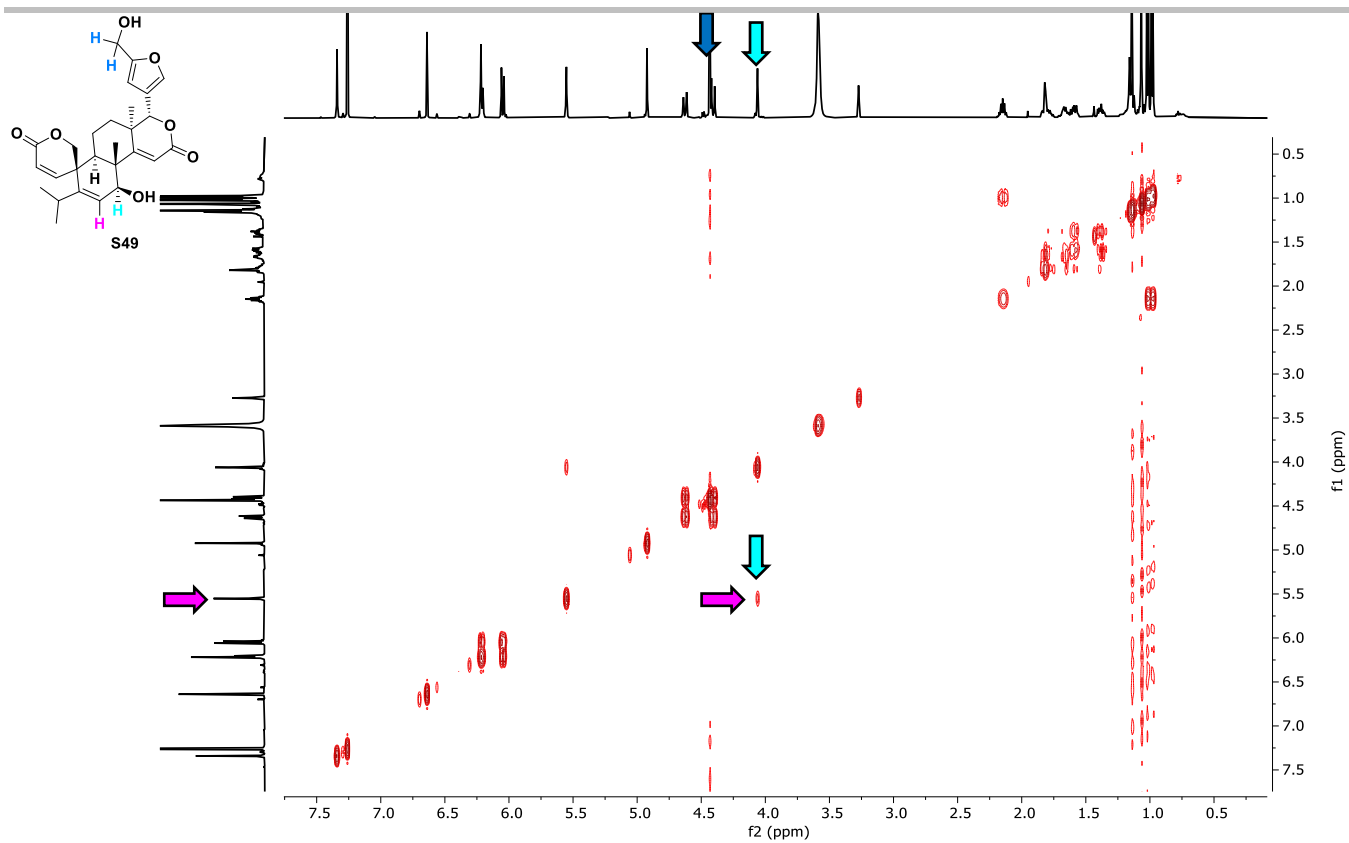 $^1\text{H}$ - $^1\text{H}$  COSY NMR

## SUPPORTING INFORMATION

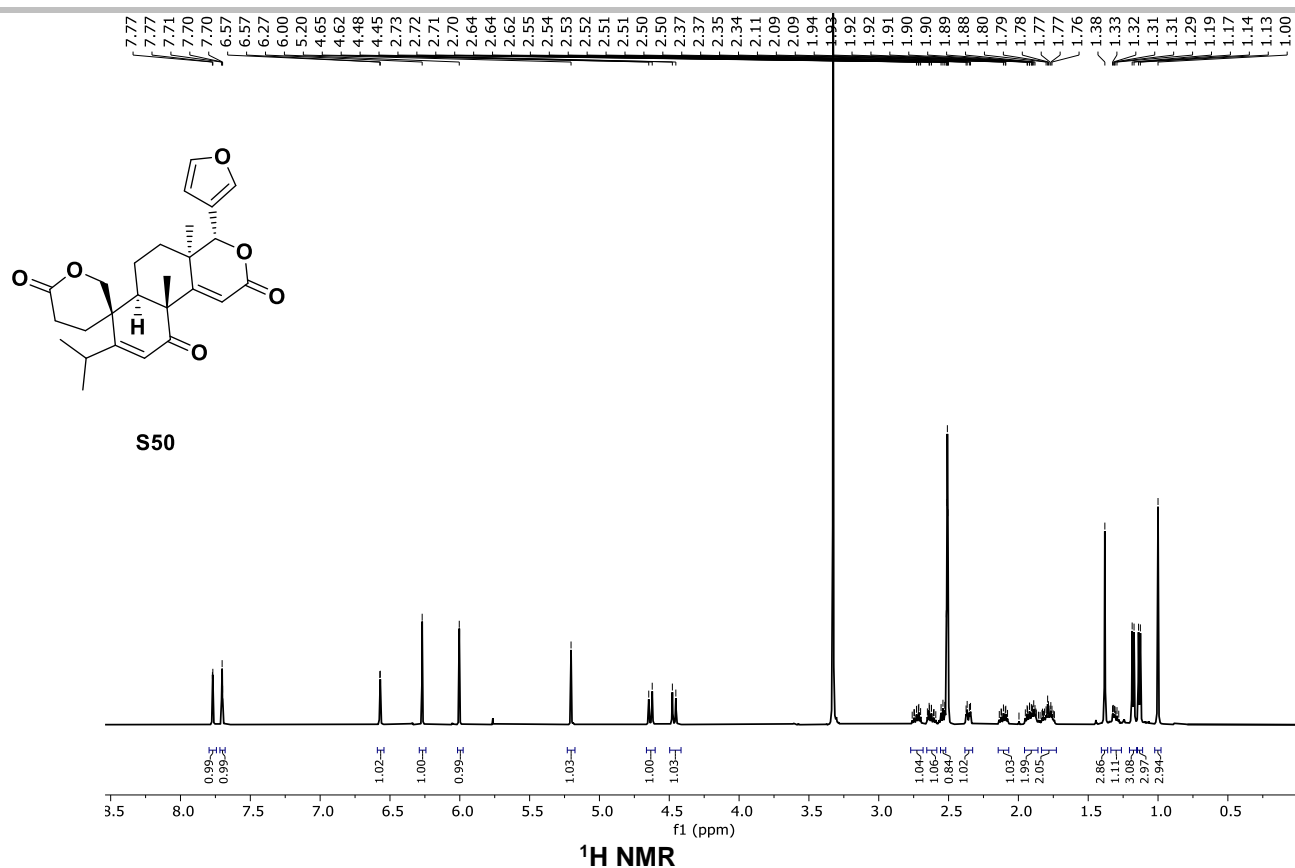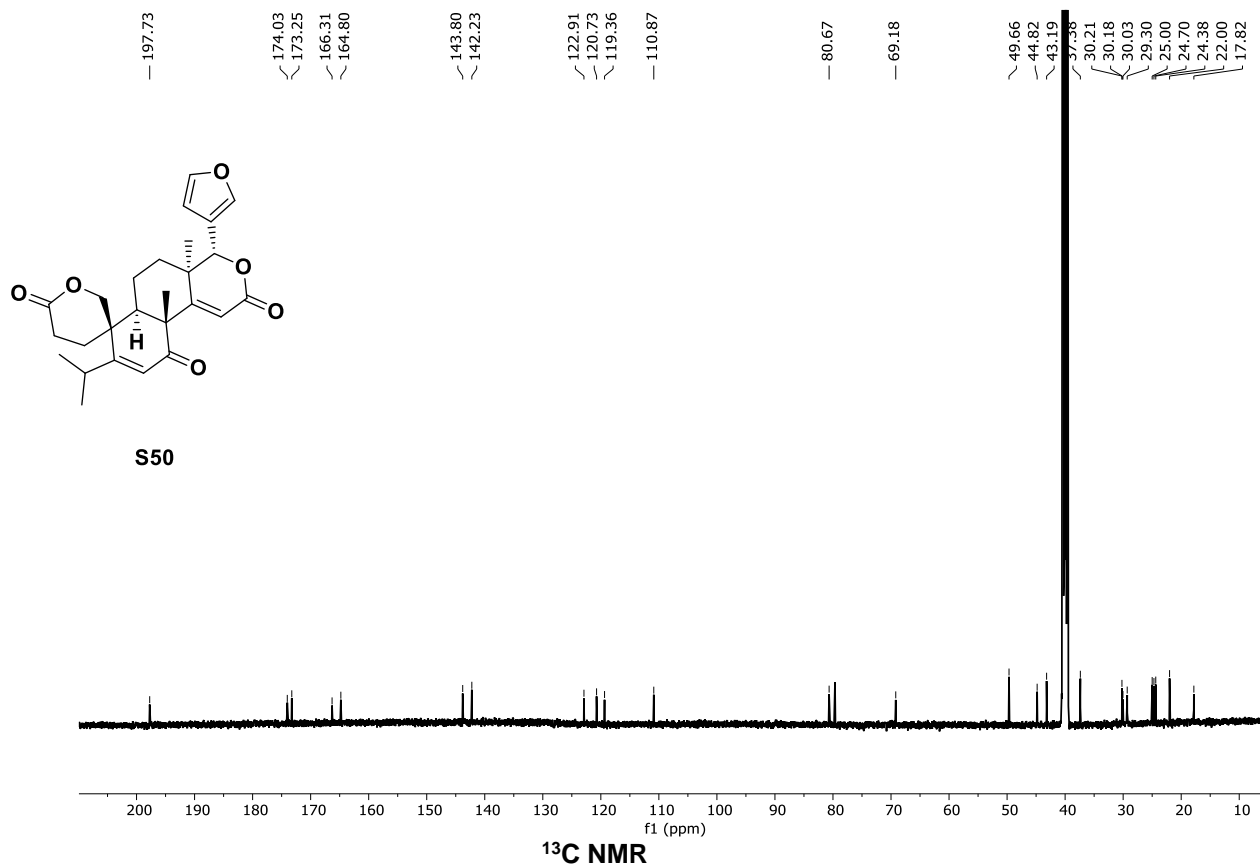

## SUPPORTING INFORMATION

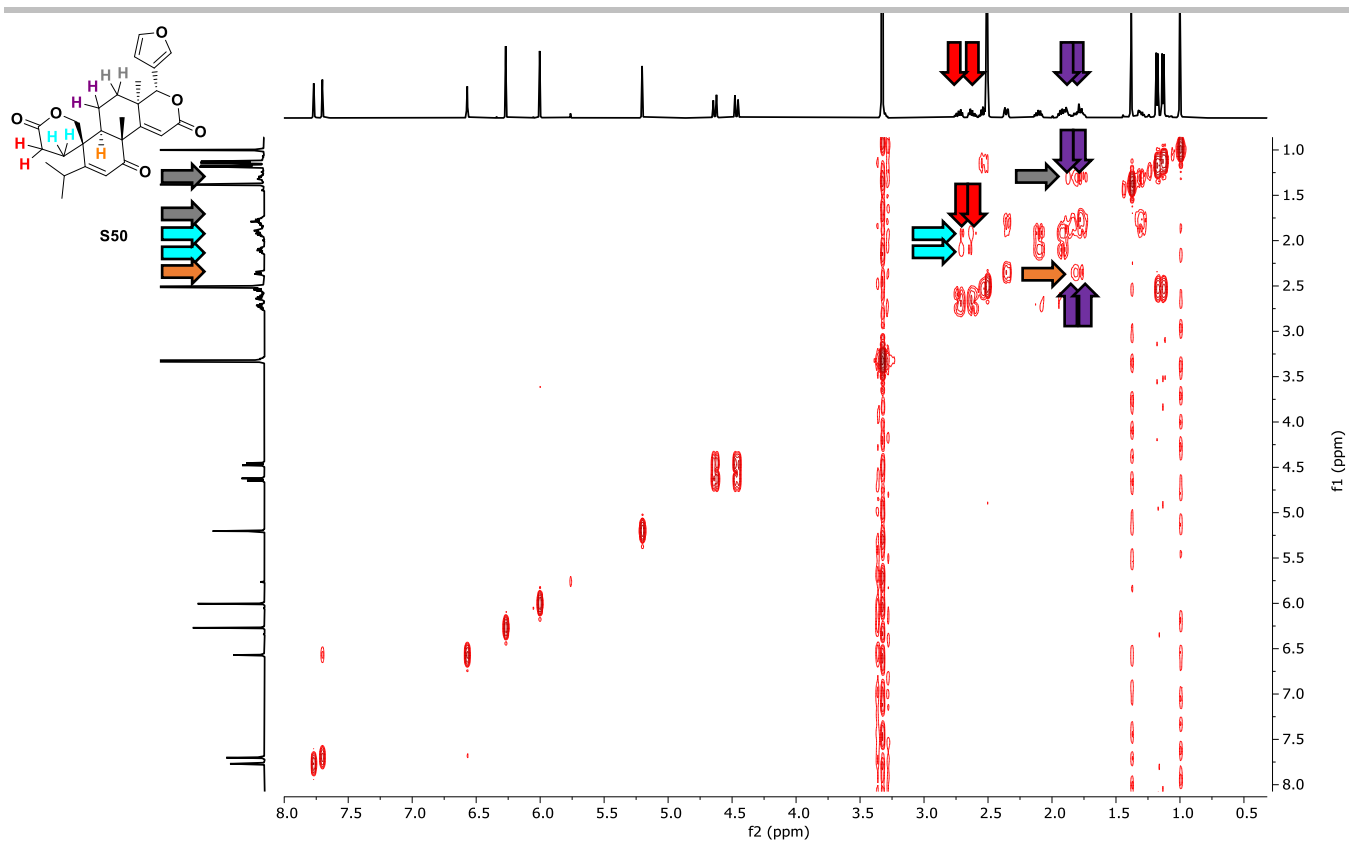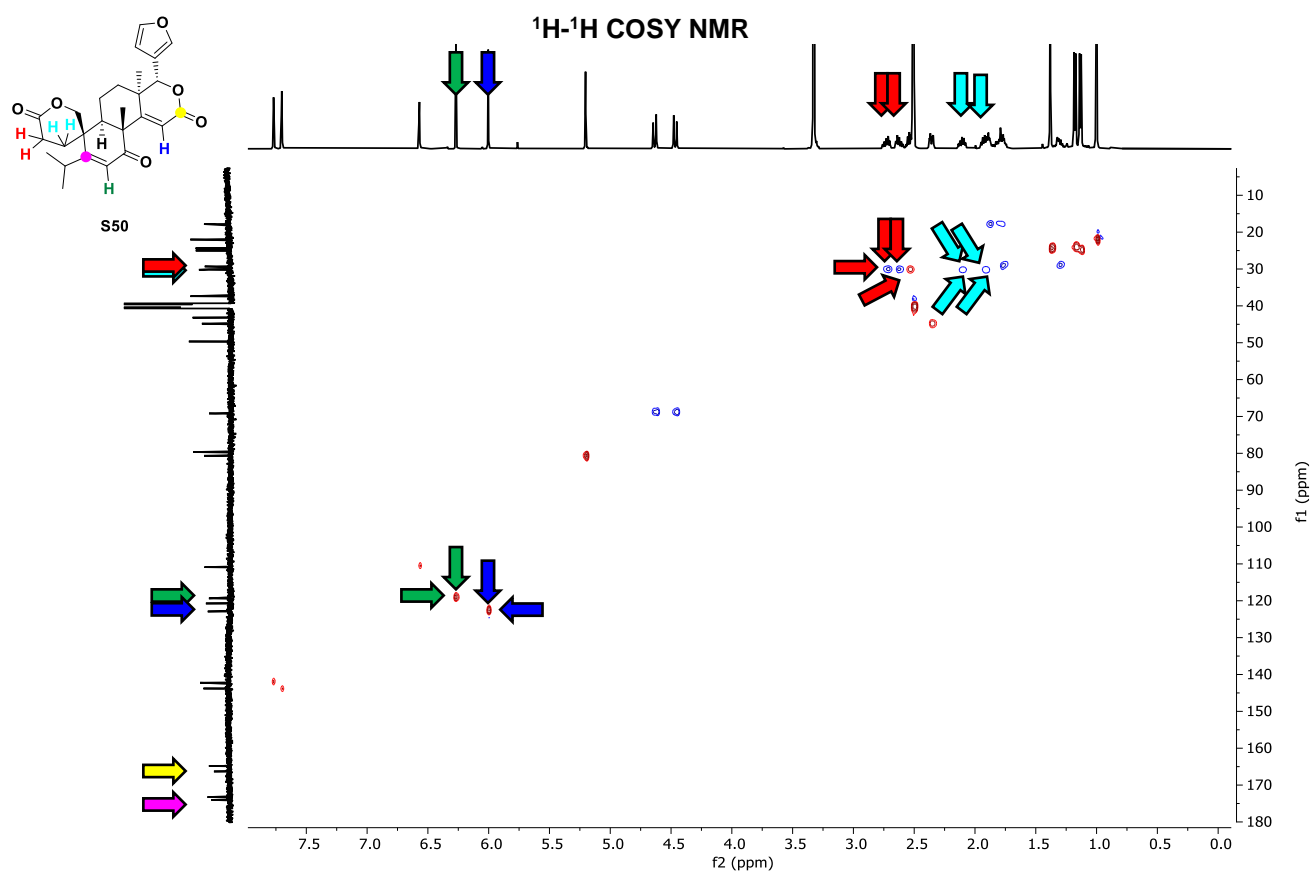

## SUPPORTING INFORMATION

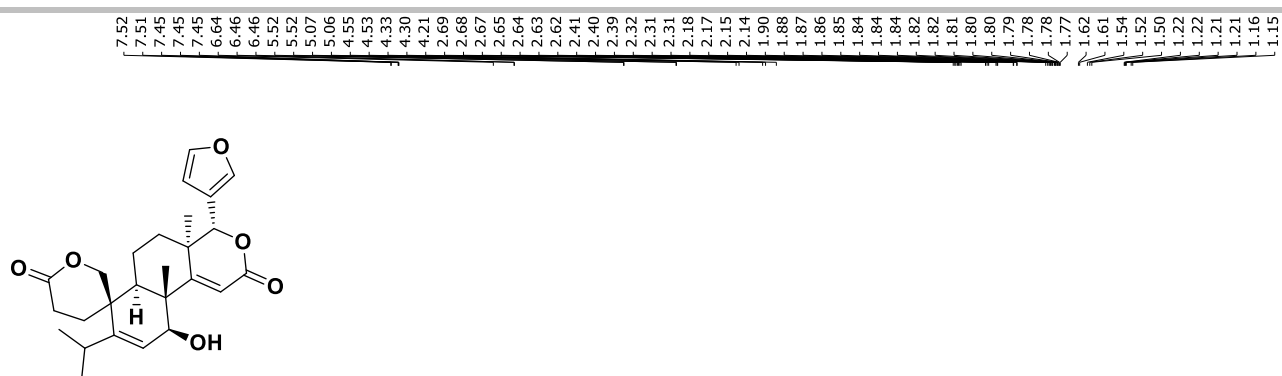

S51

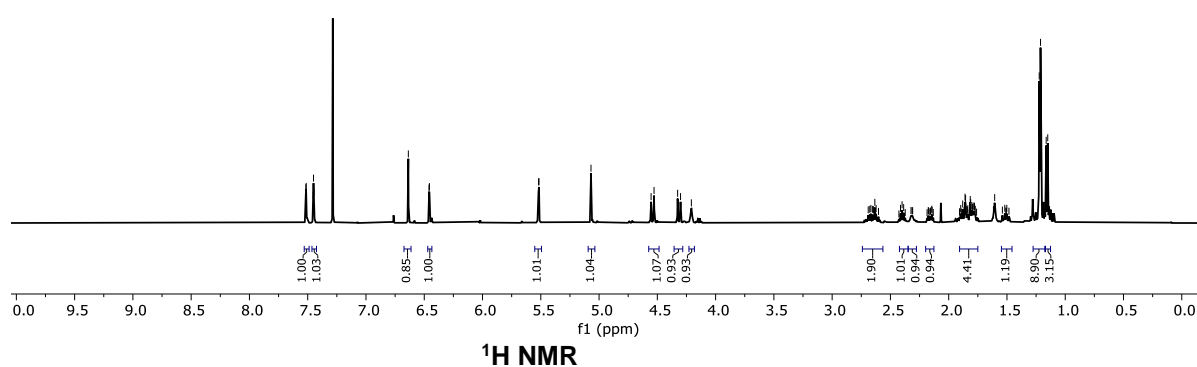 $^1\text{H}$  NMR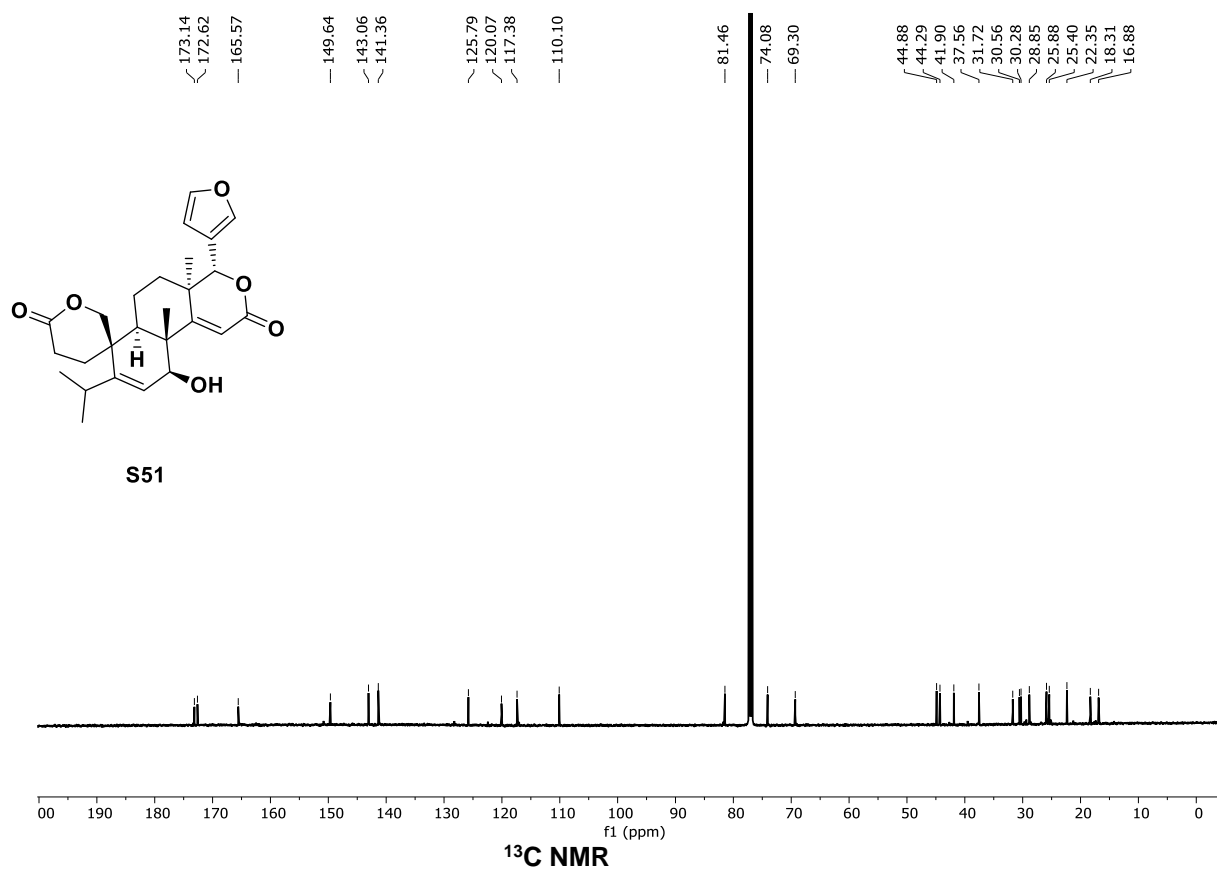

S51

 $^{13}\text{C}$  NMR

## SUPPORTING INFORMATION

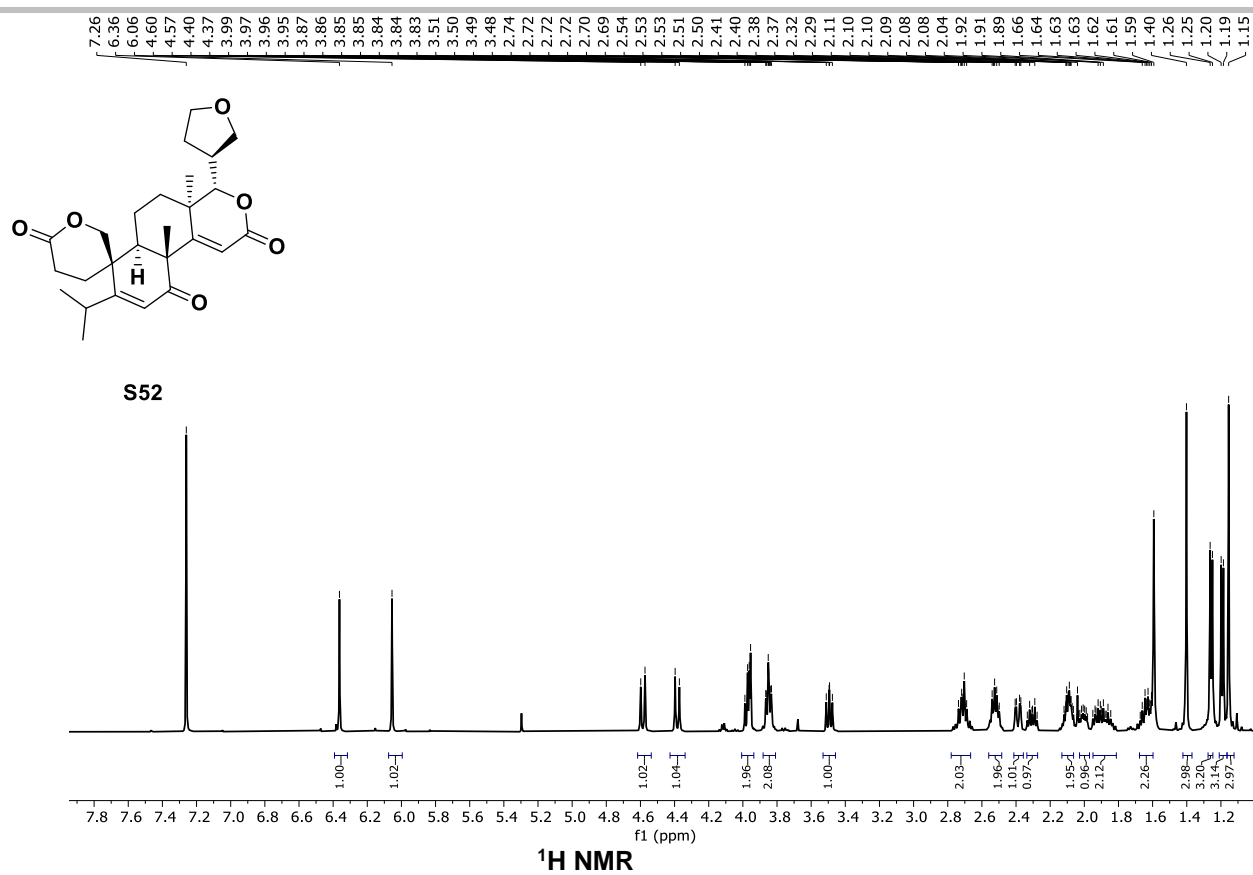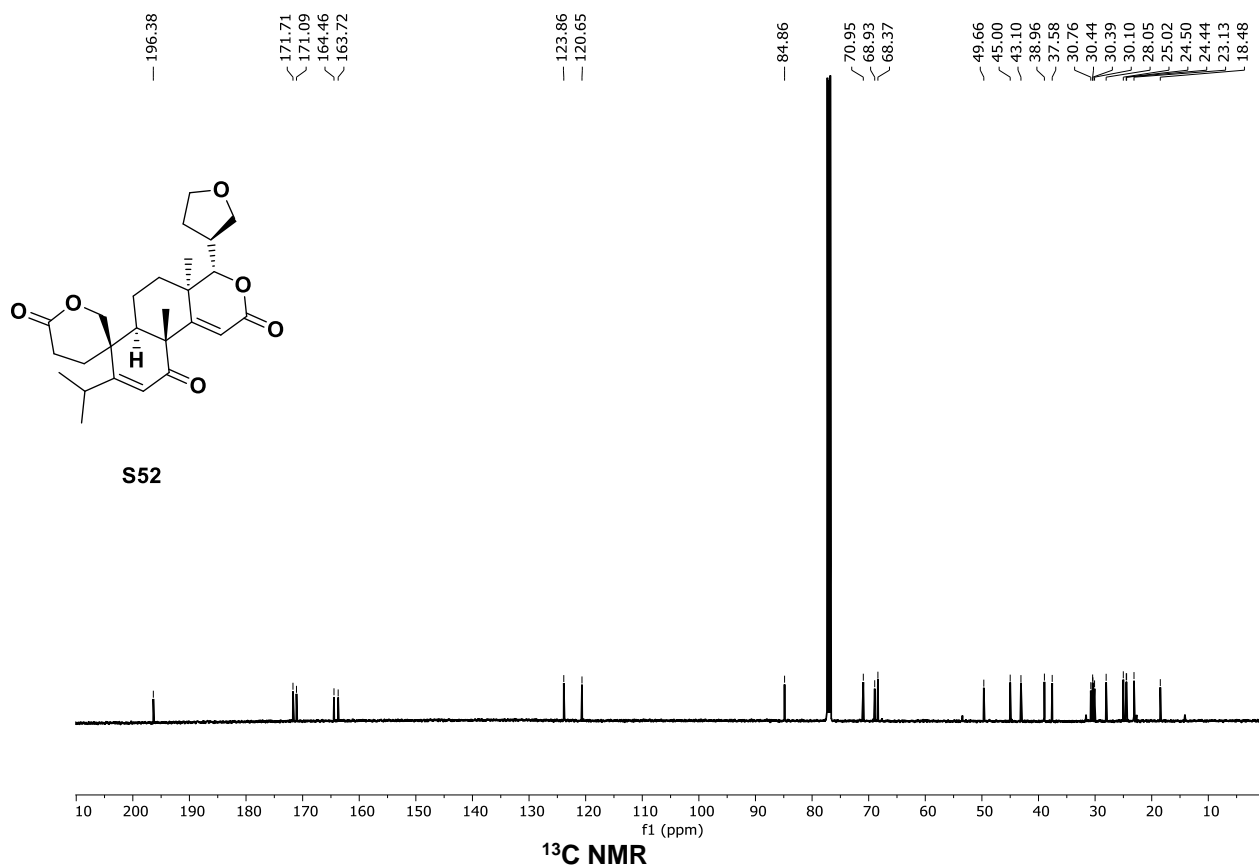

## SUPPORTING INFORMATION

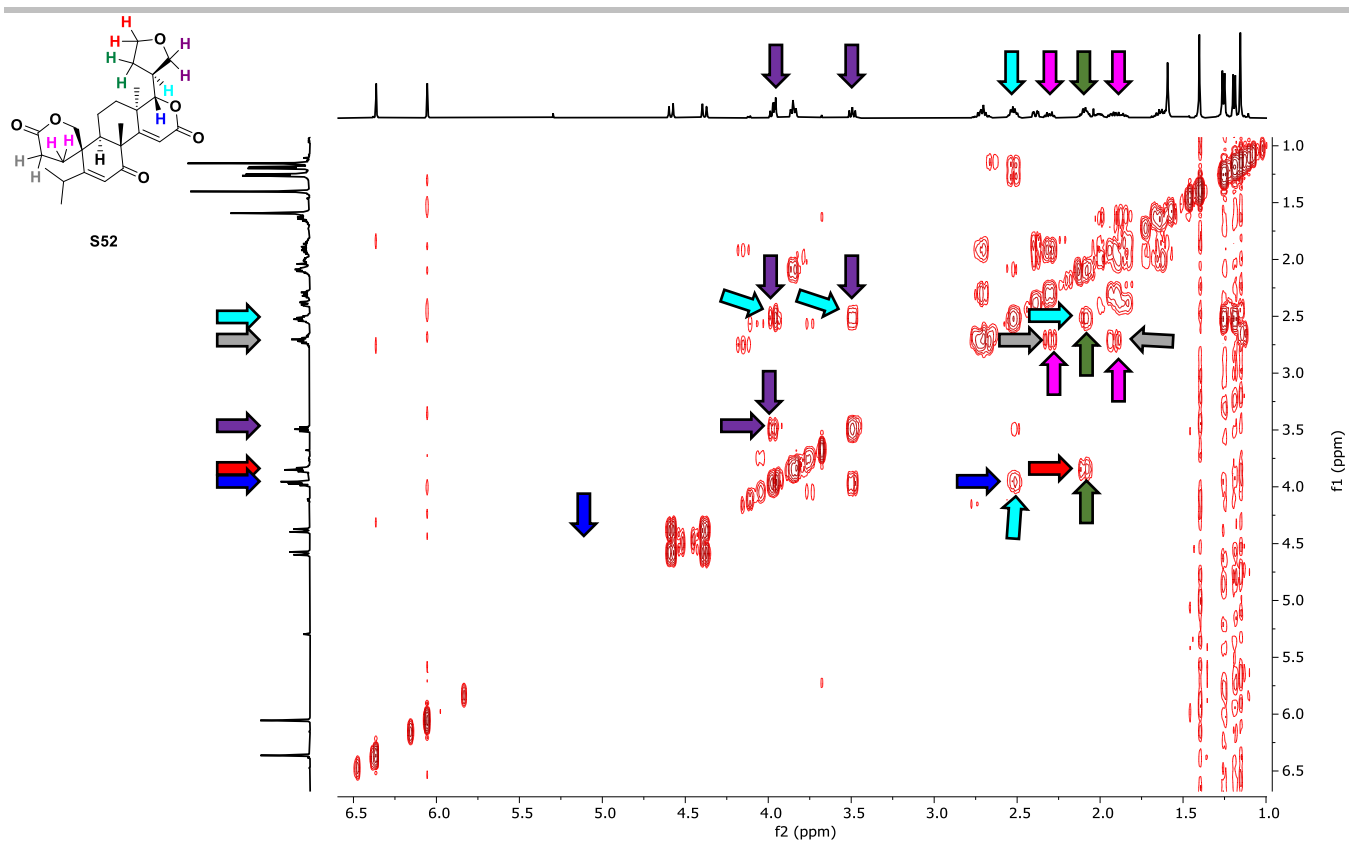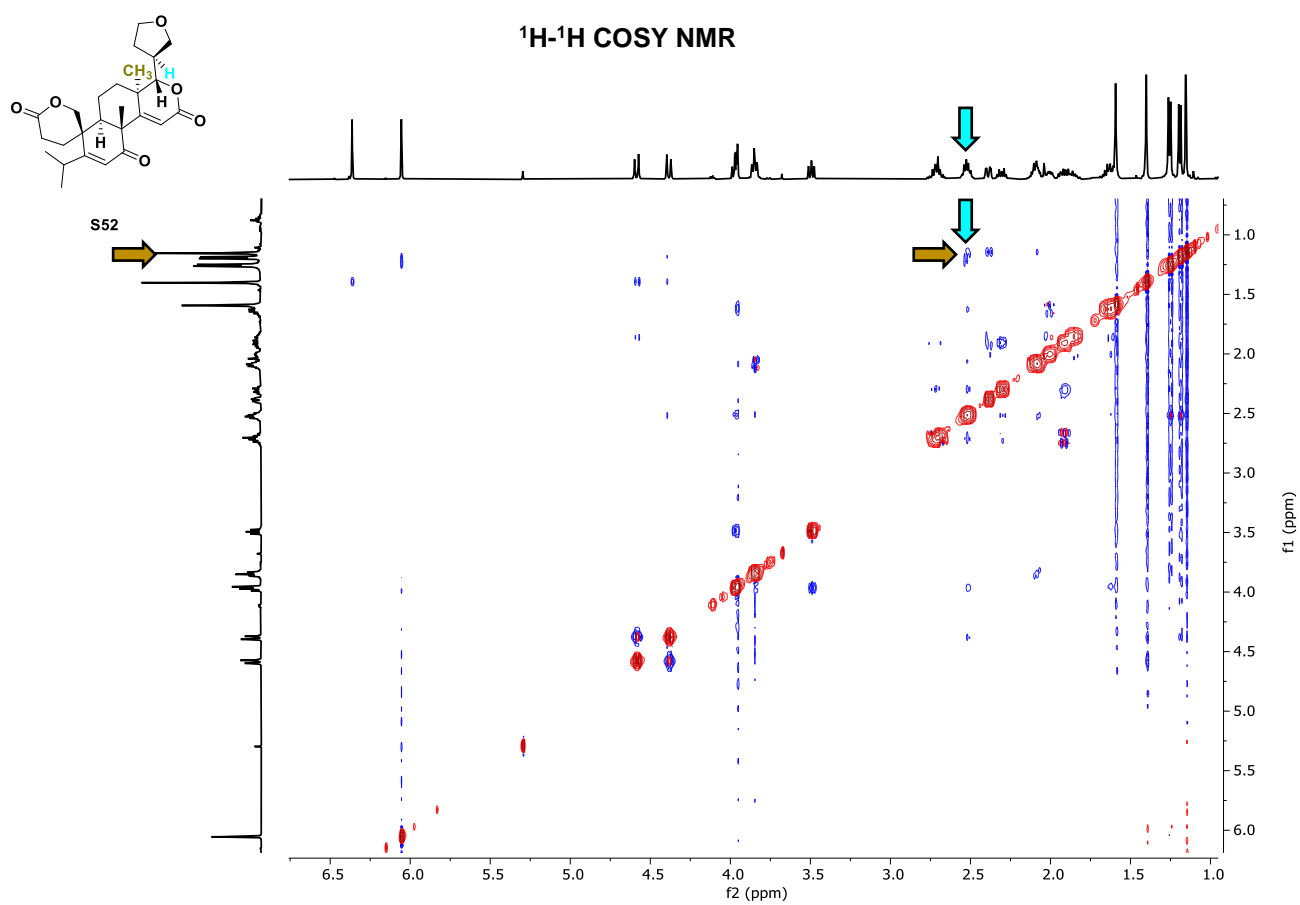





## SUPPORTING INFORMATION

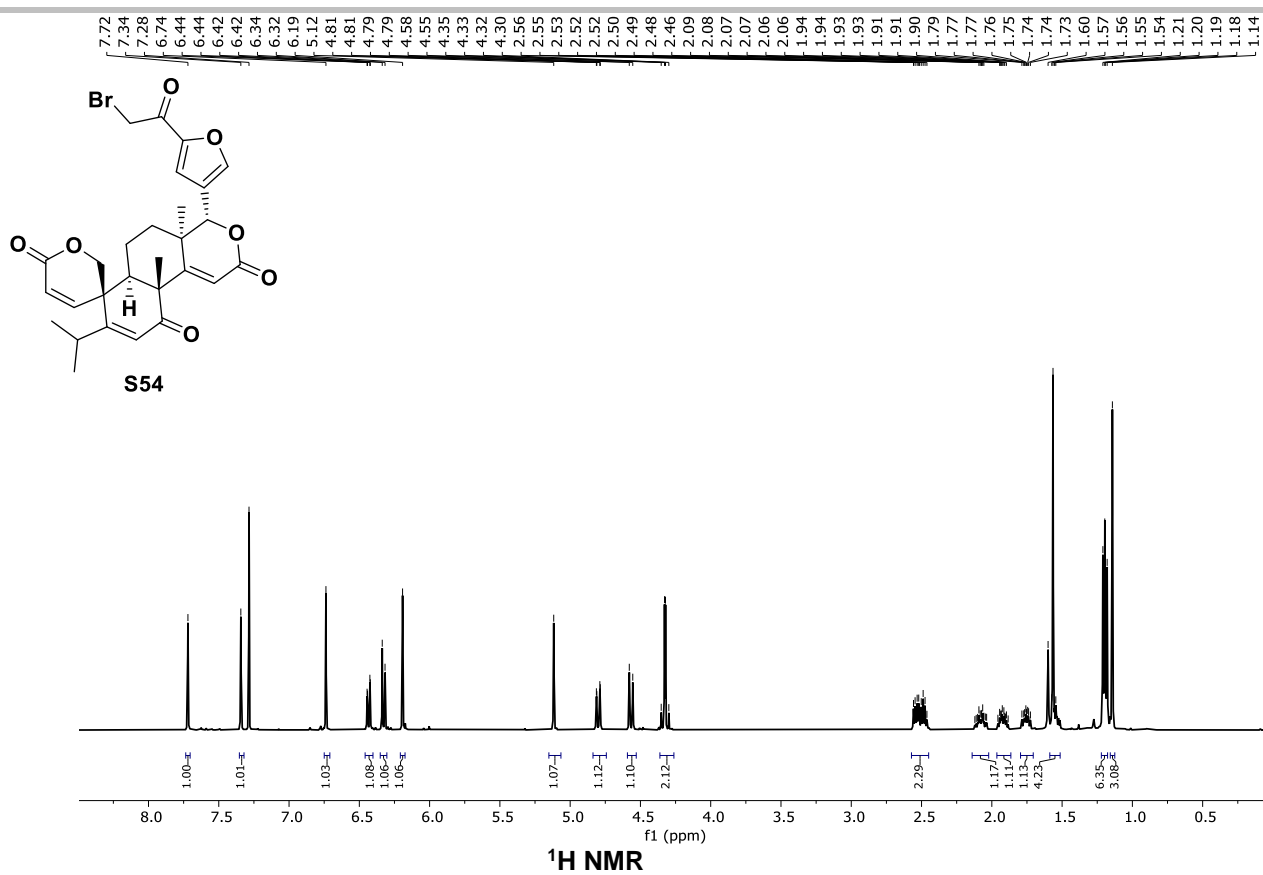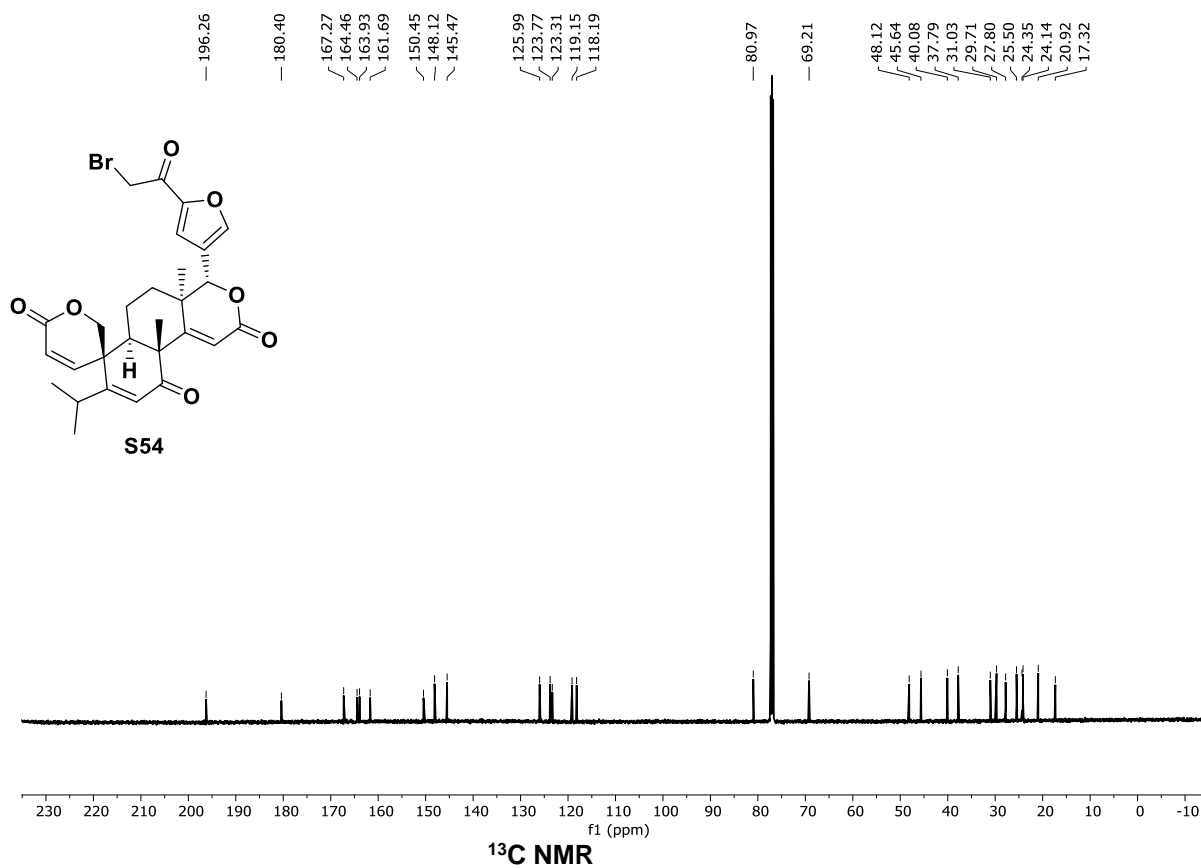

## SUPPORTING INFORMATION

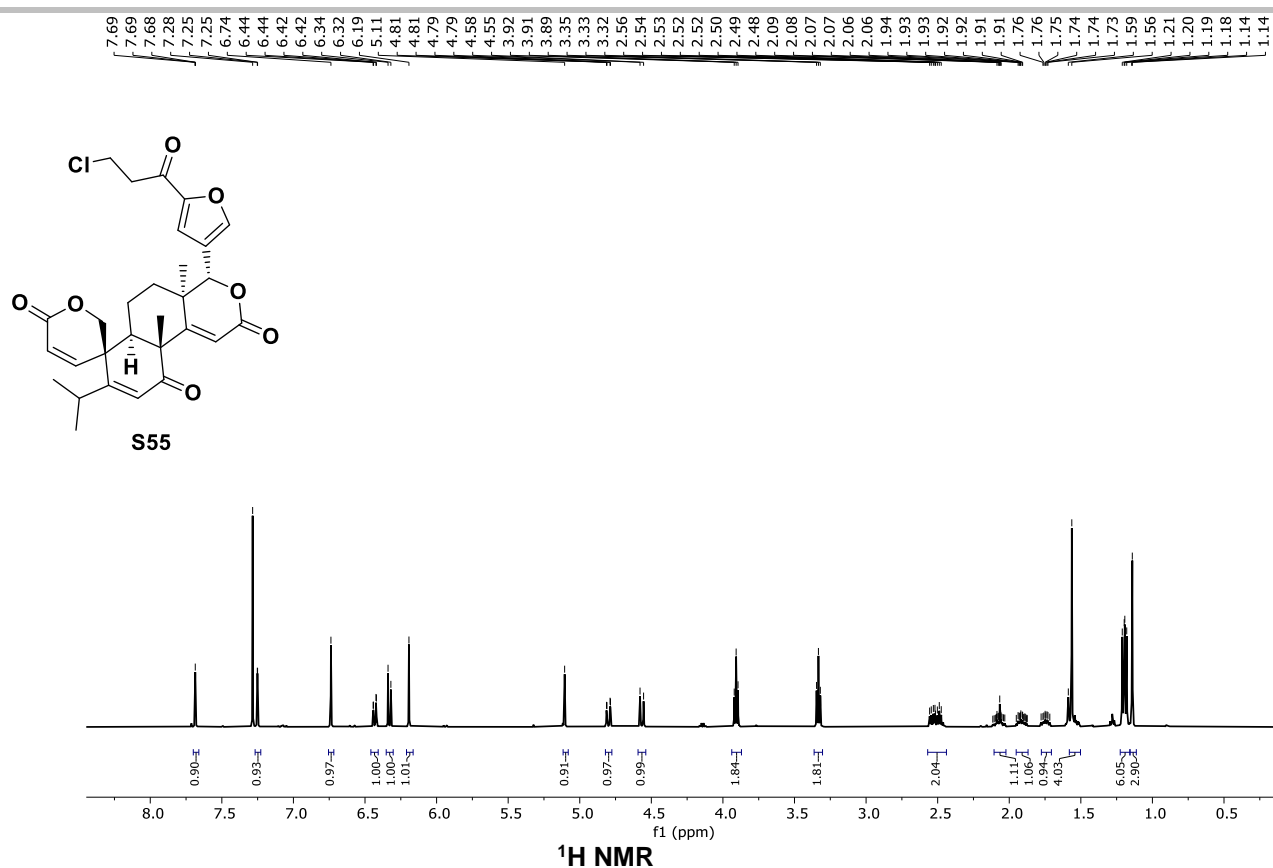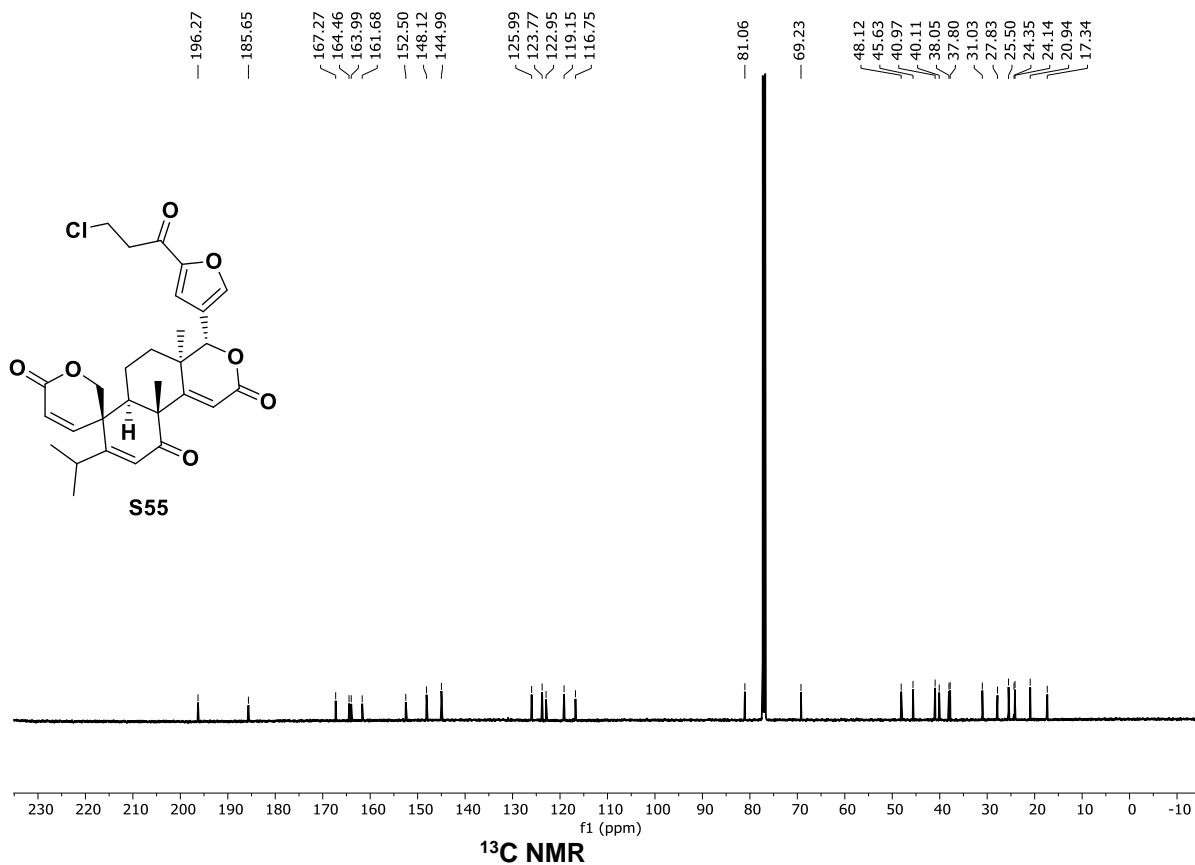

## SUPPORTING INFORMATION

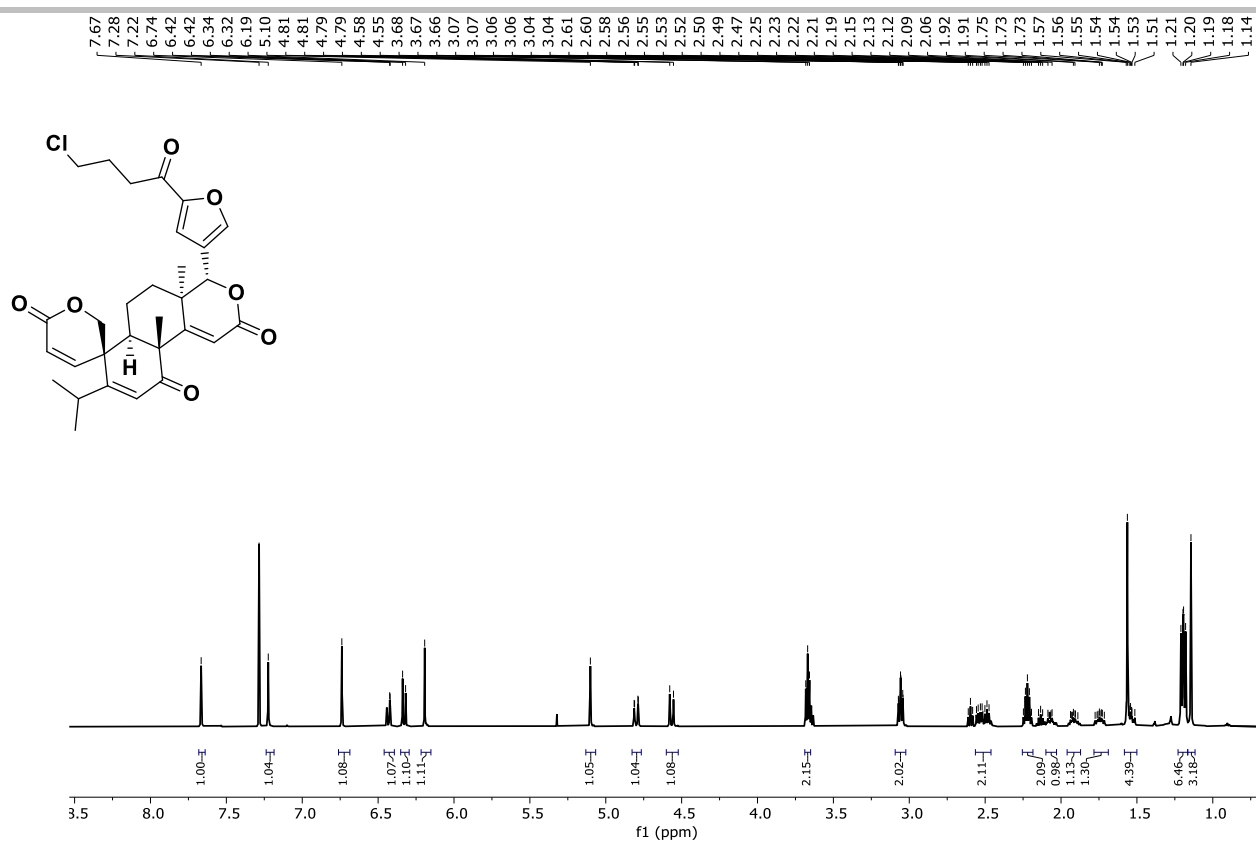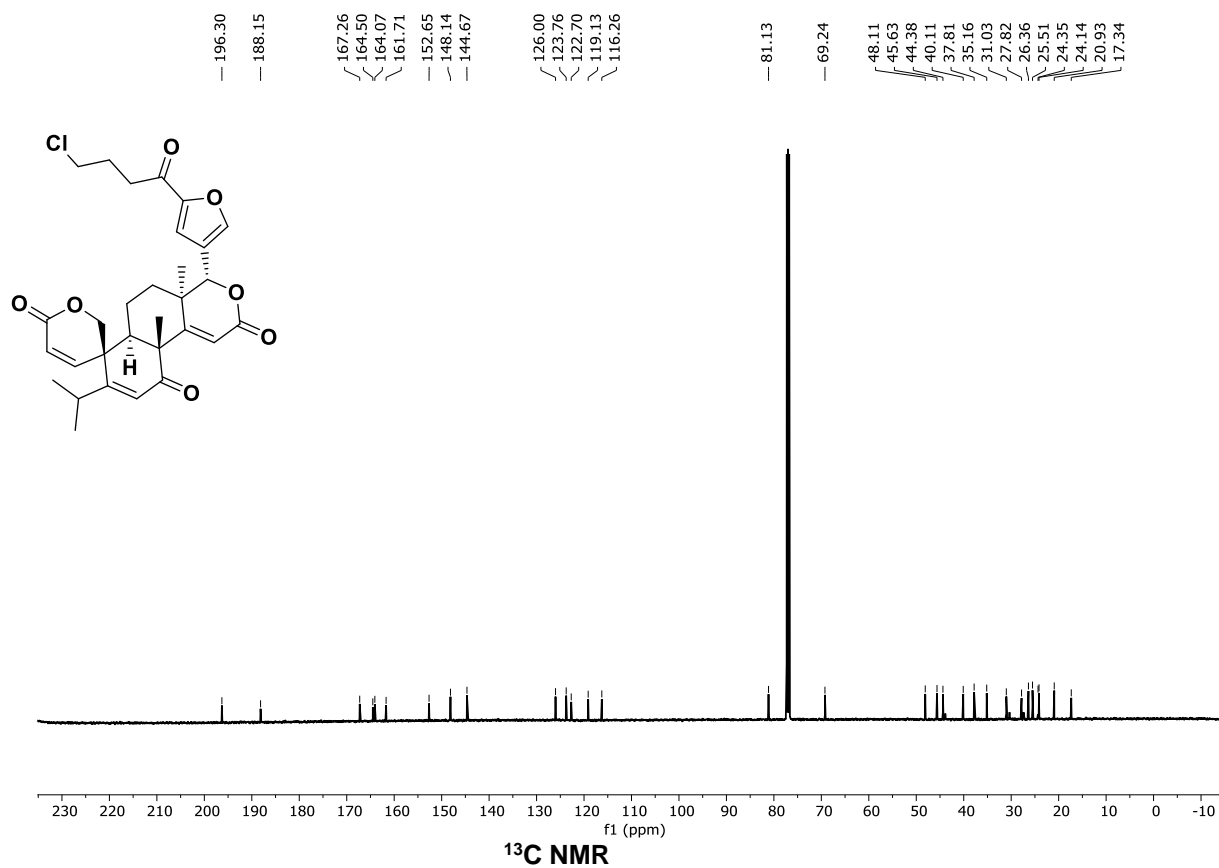

## SUPPORTING INFORMATION

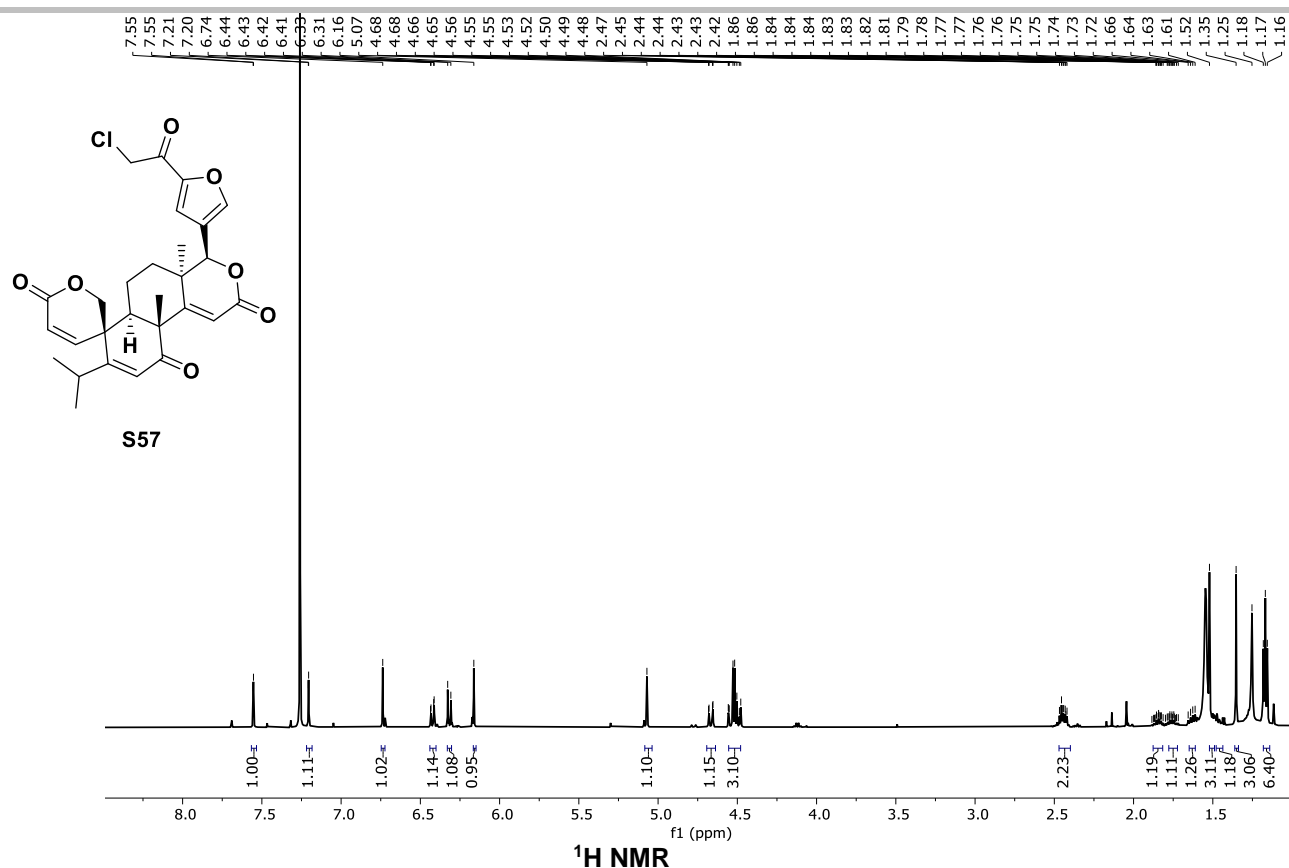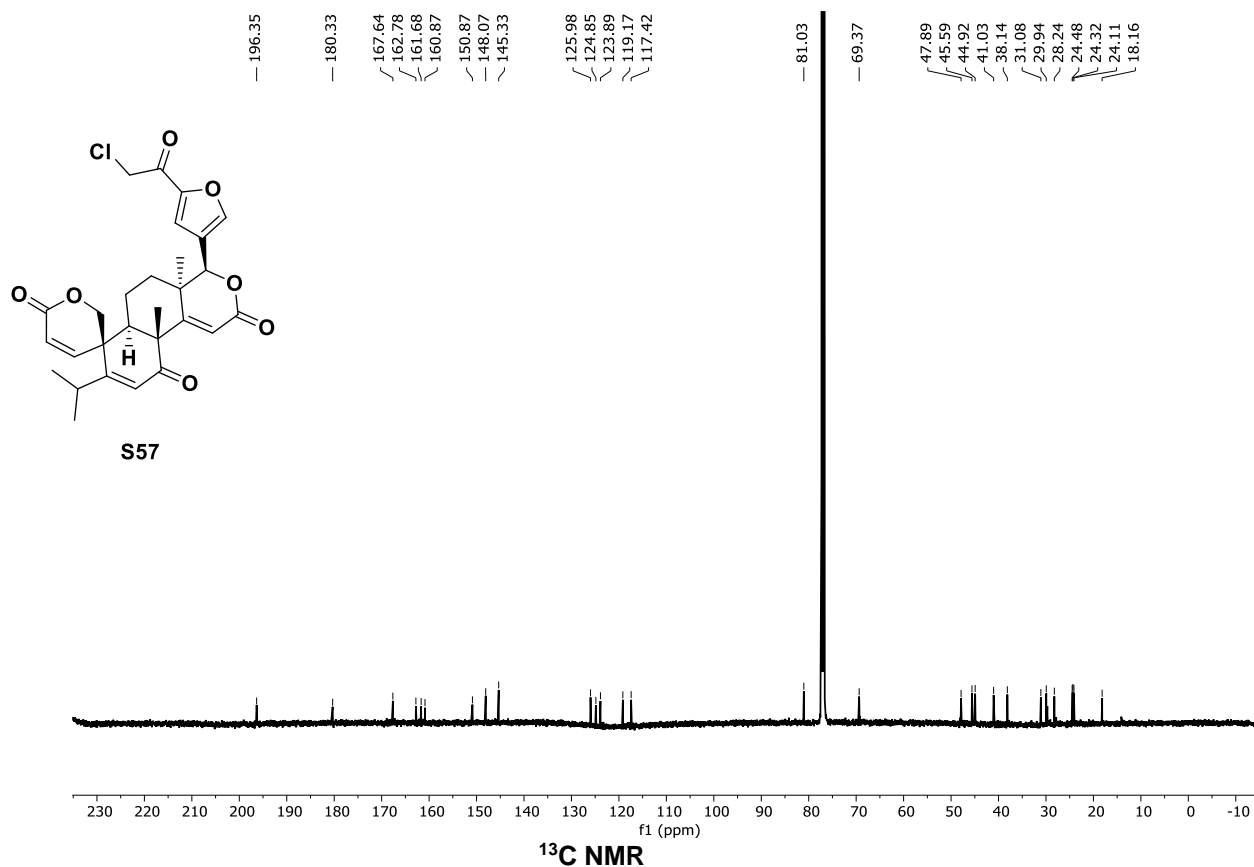



## SUPPORTING INFORMATION

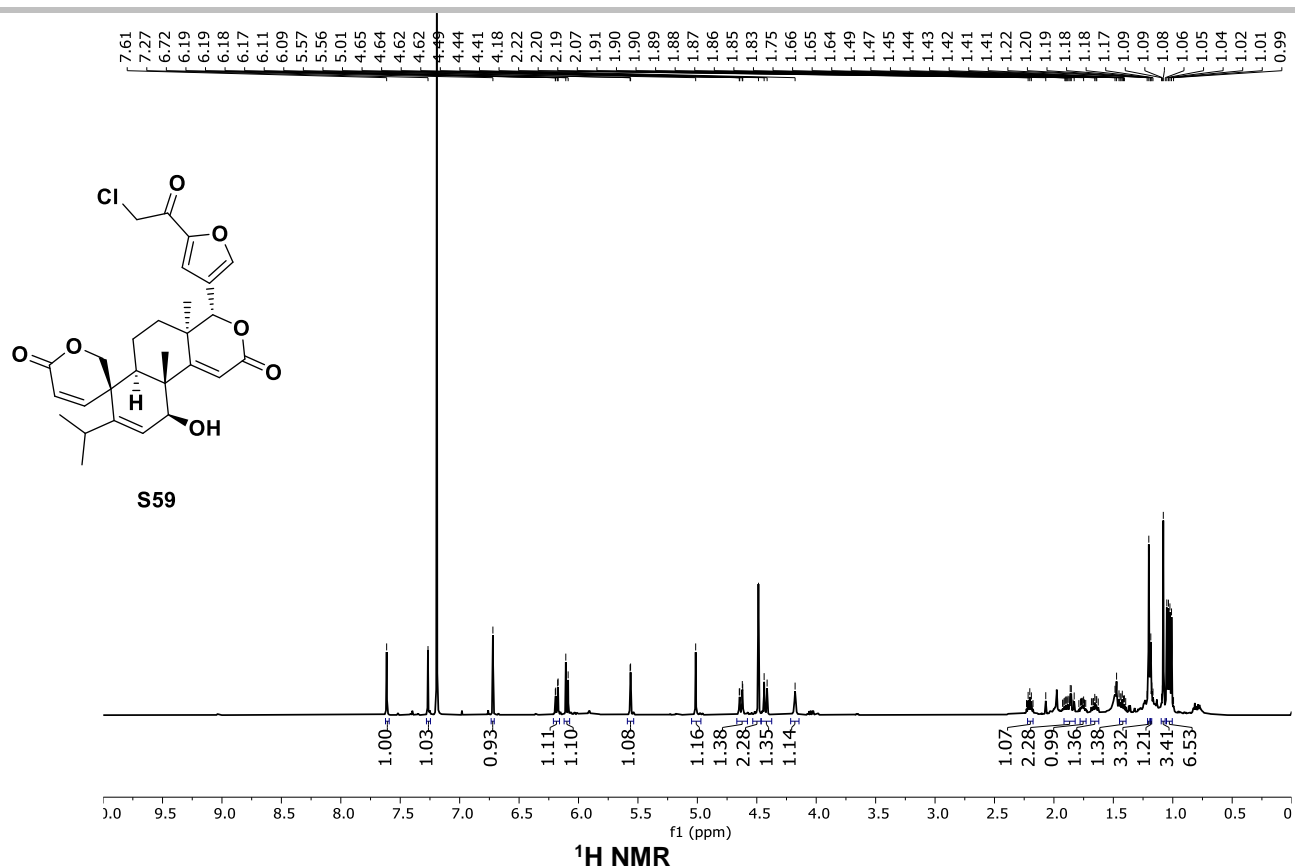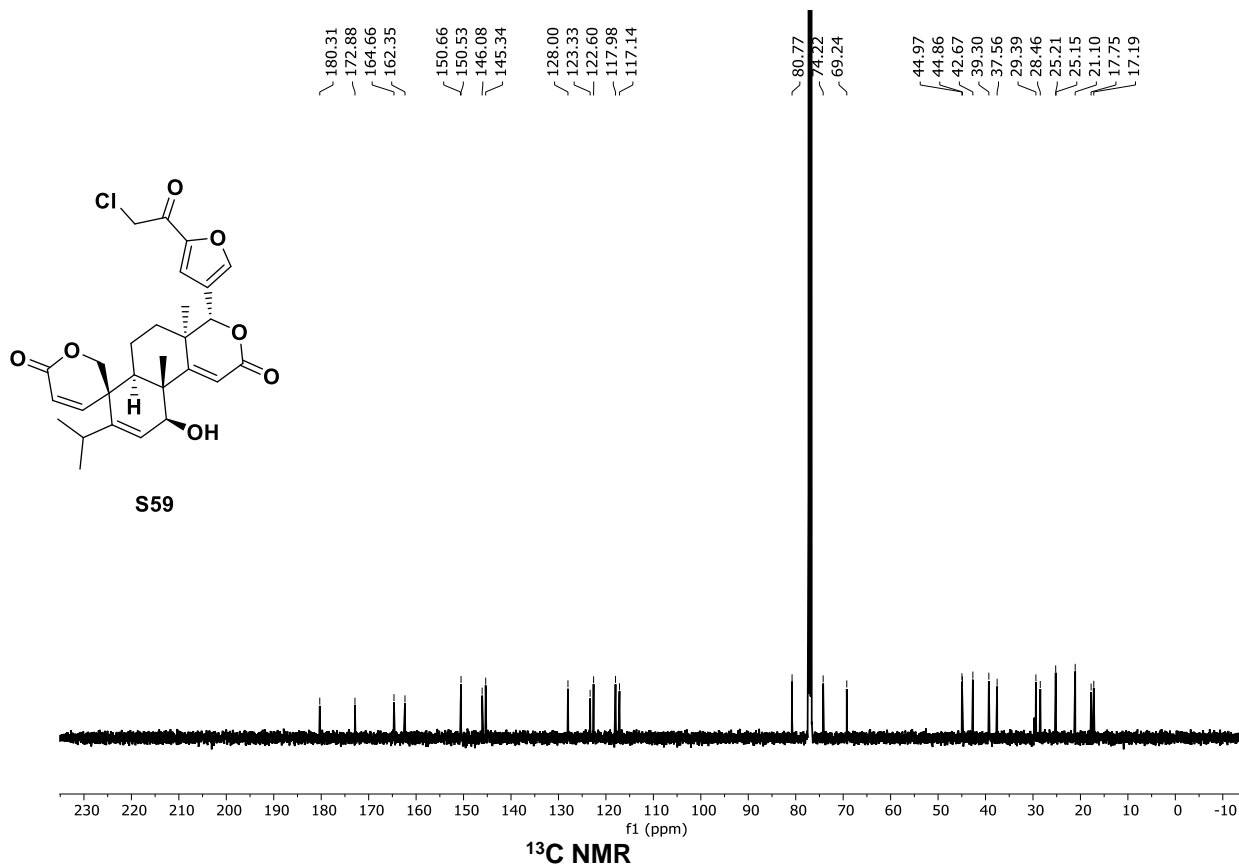

## SUPPORTING INFORMATION

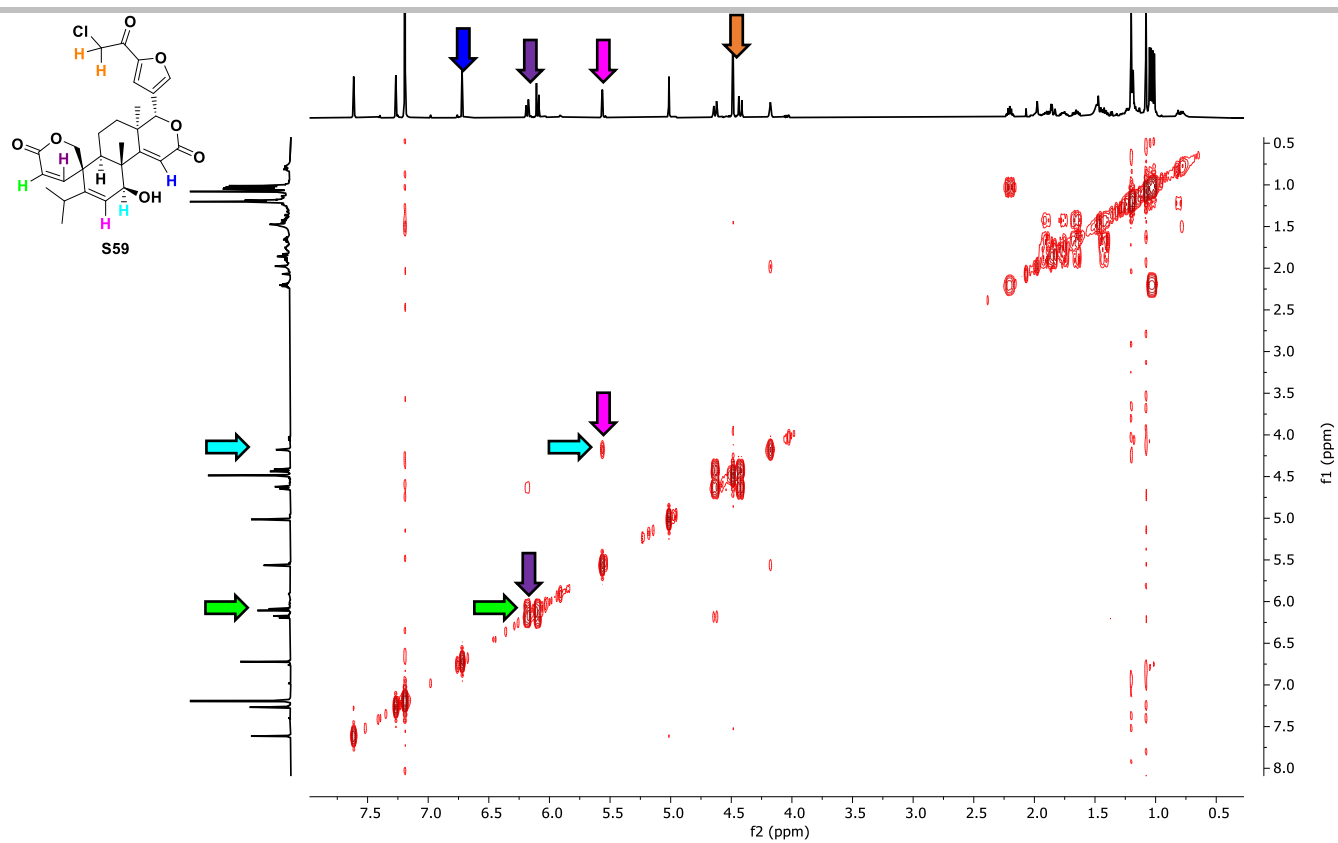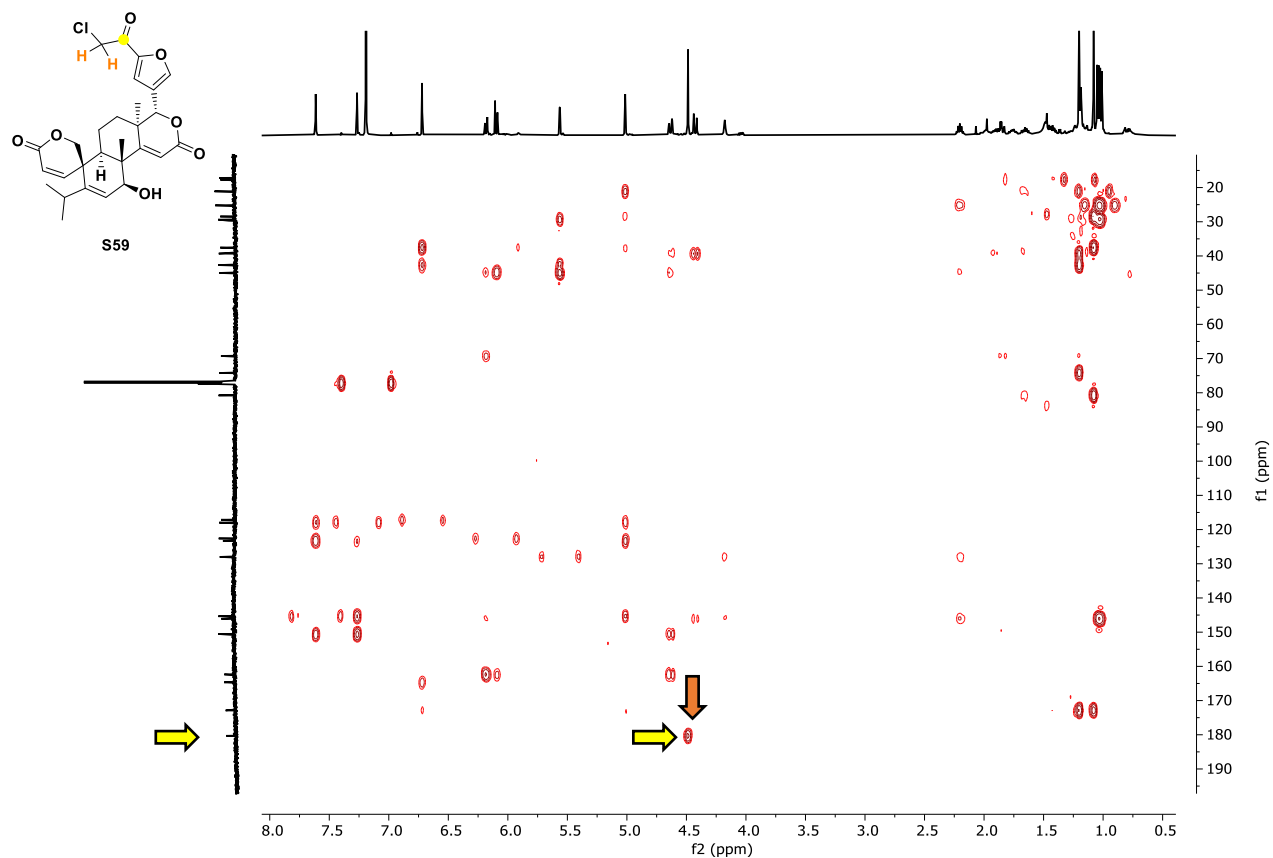



## SUPPORTING INFORMATION

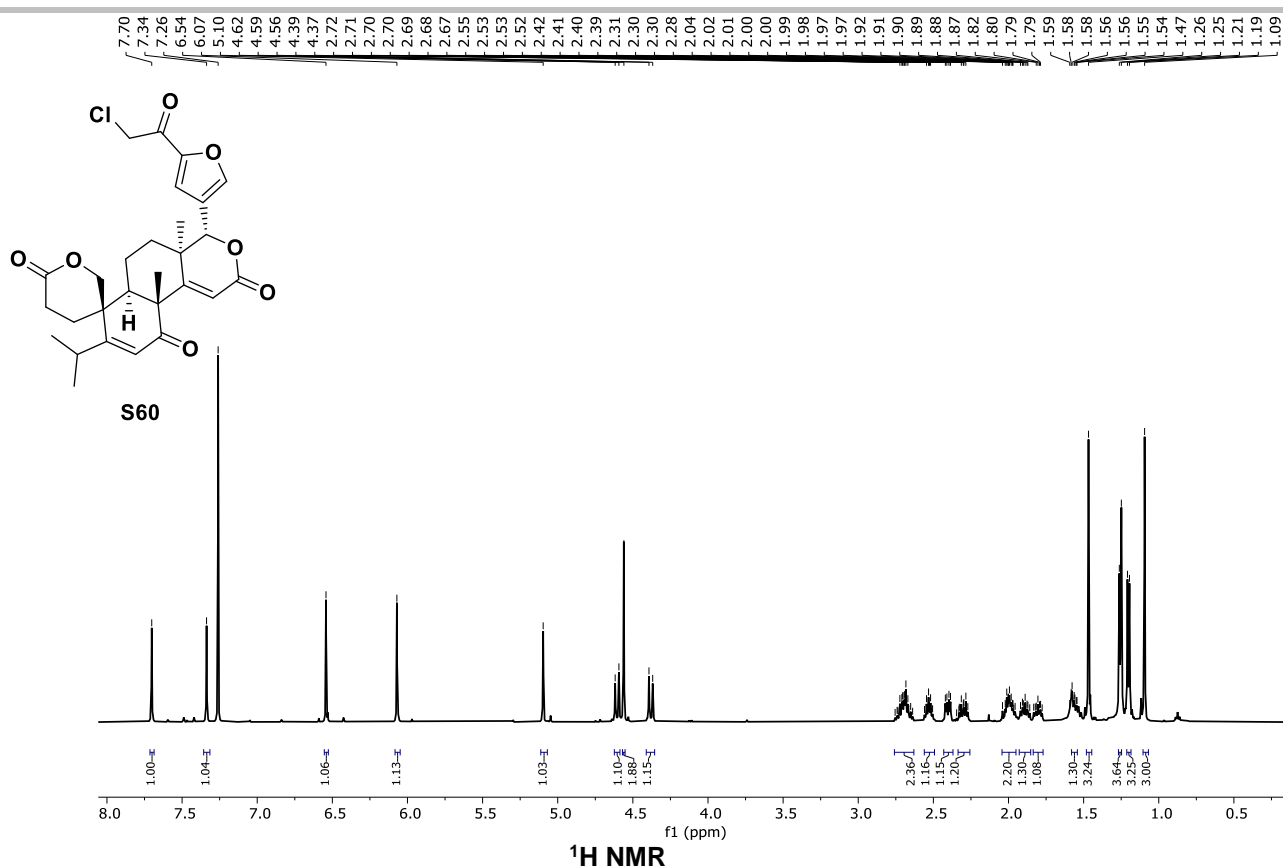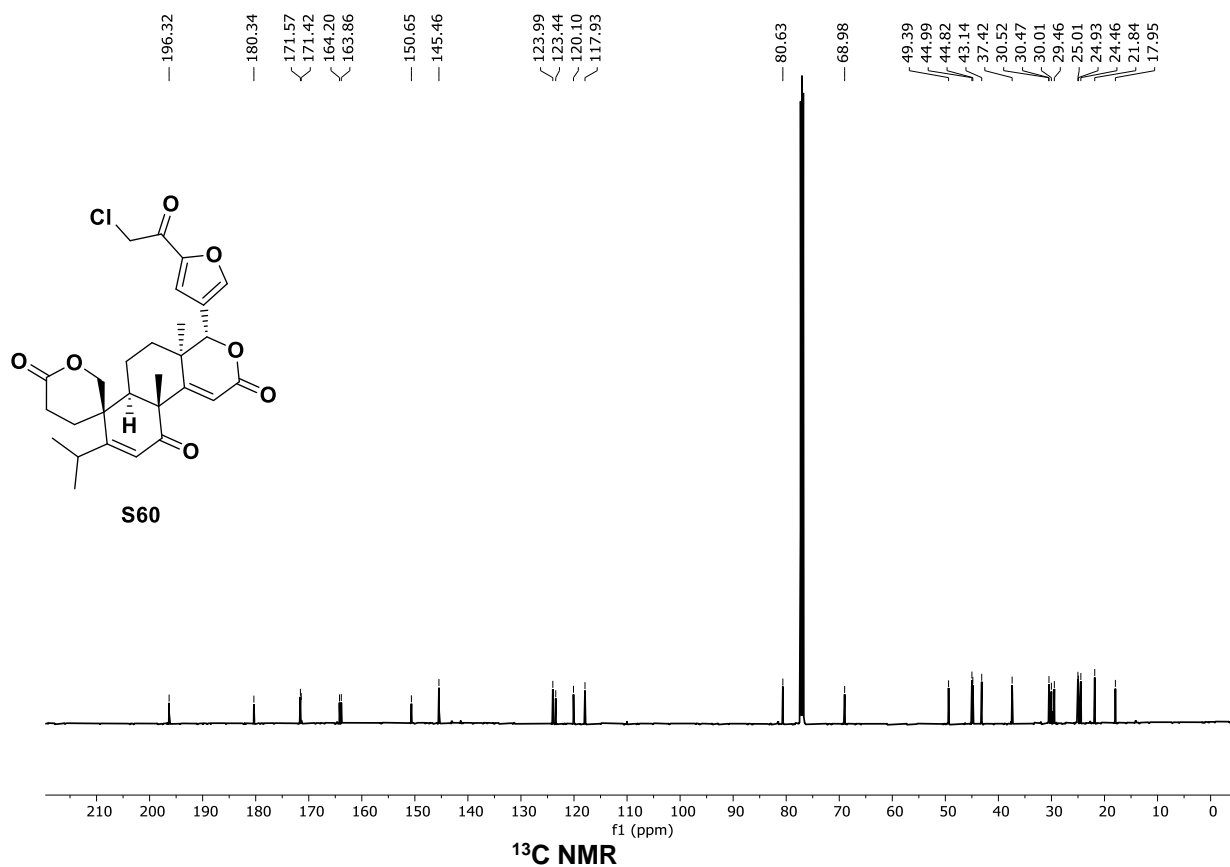

## SUPPORTING INFORMATION

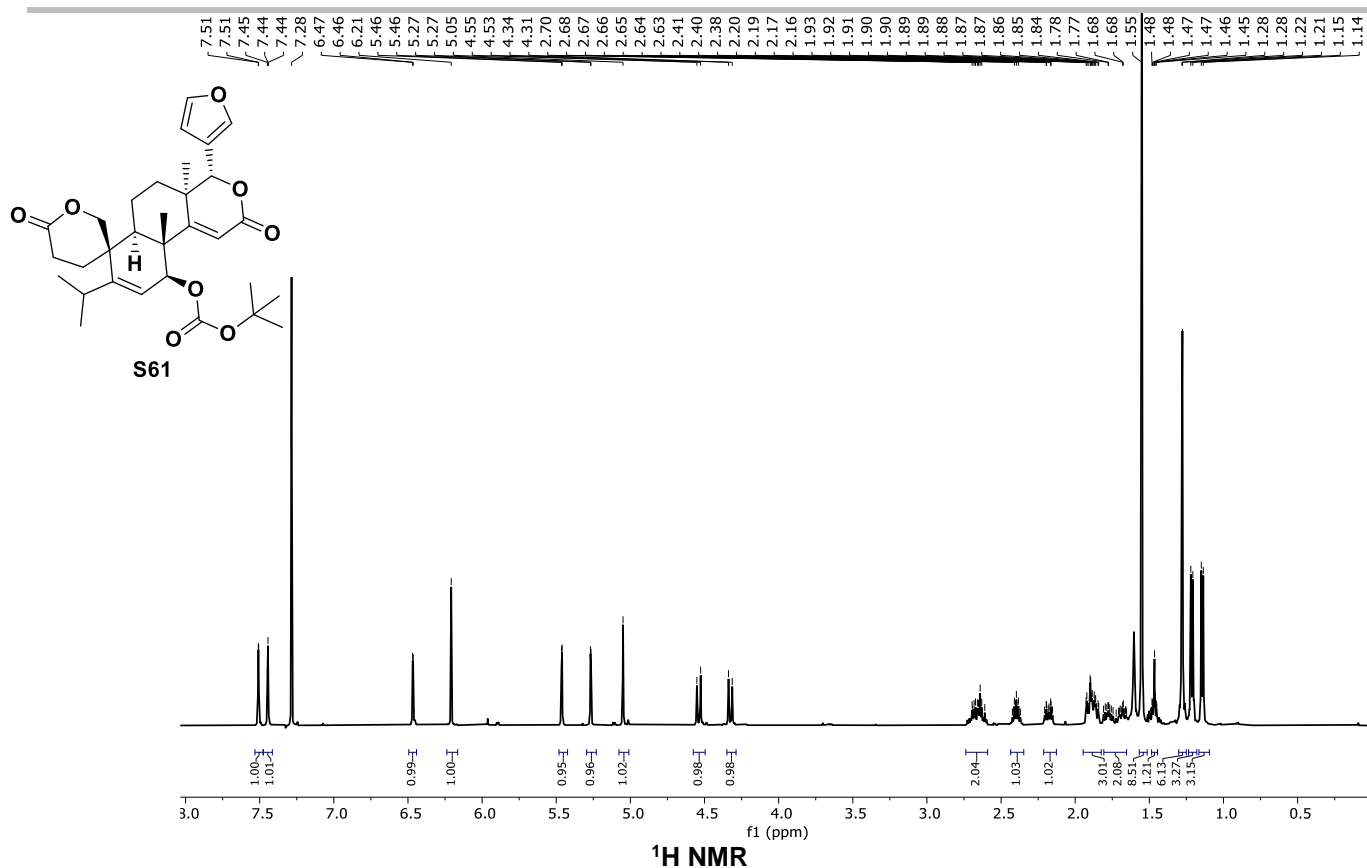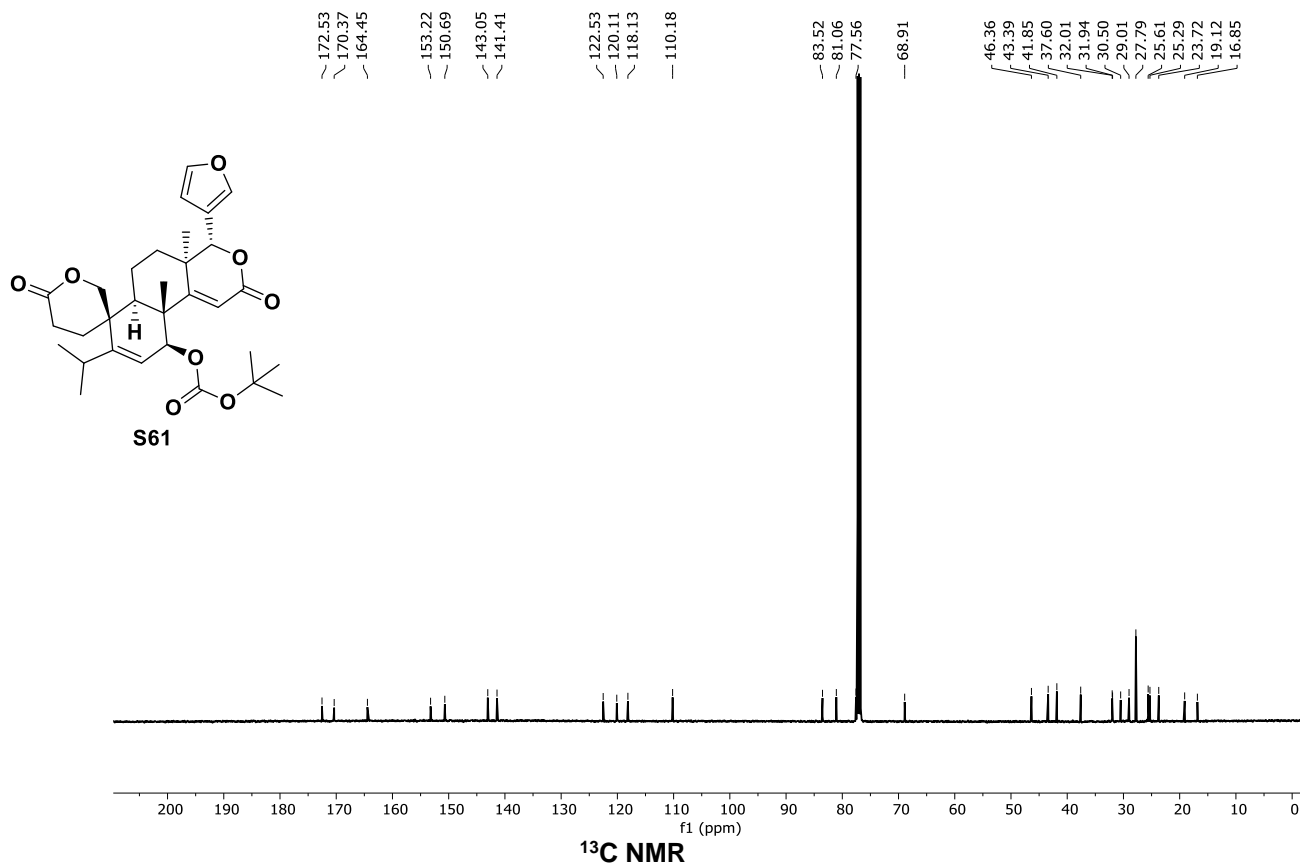

## SUPPORTING INFORMATION

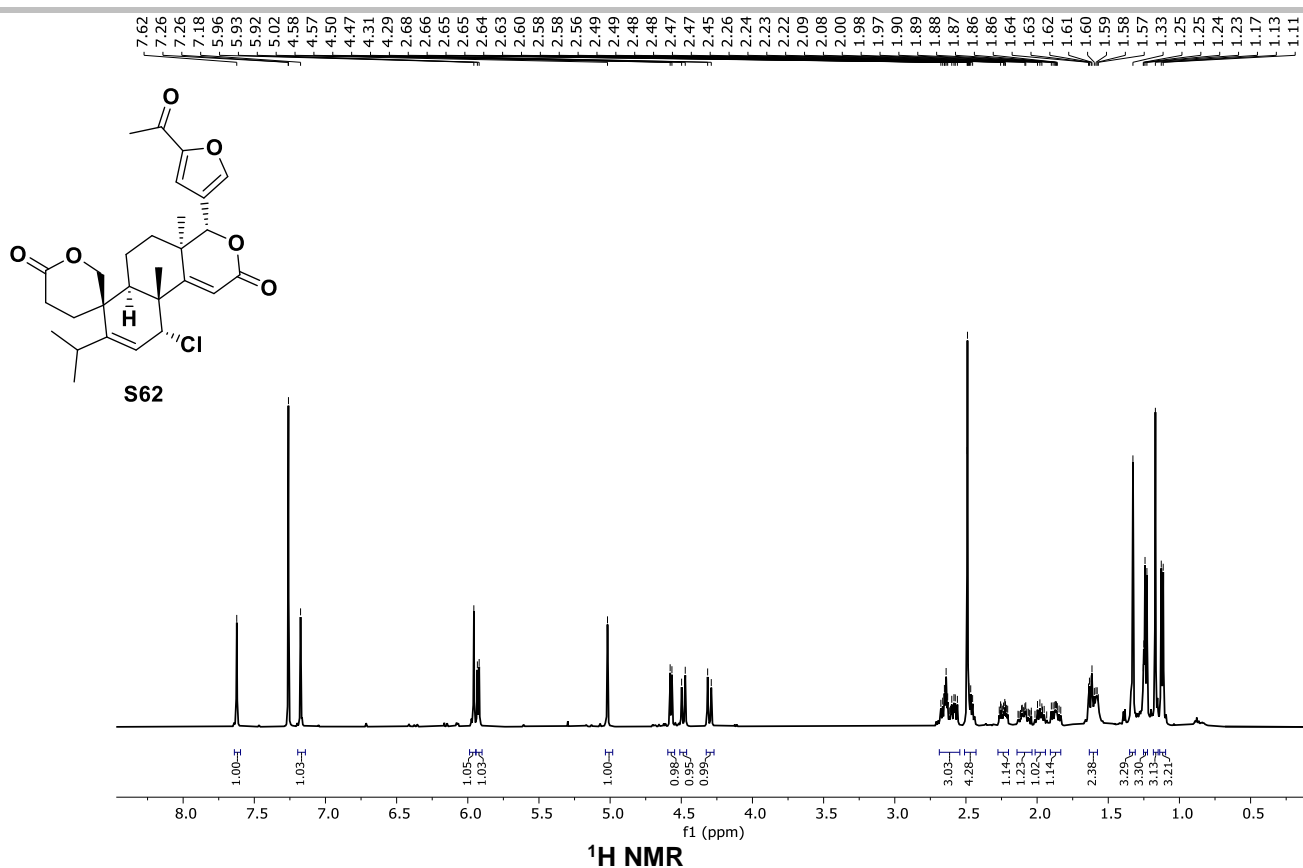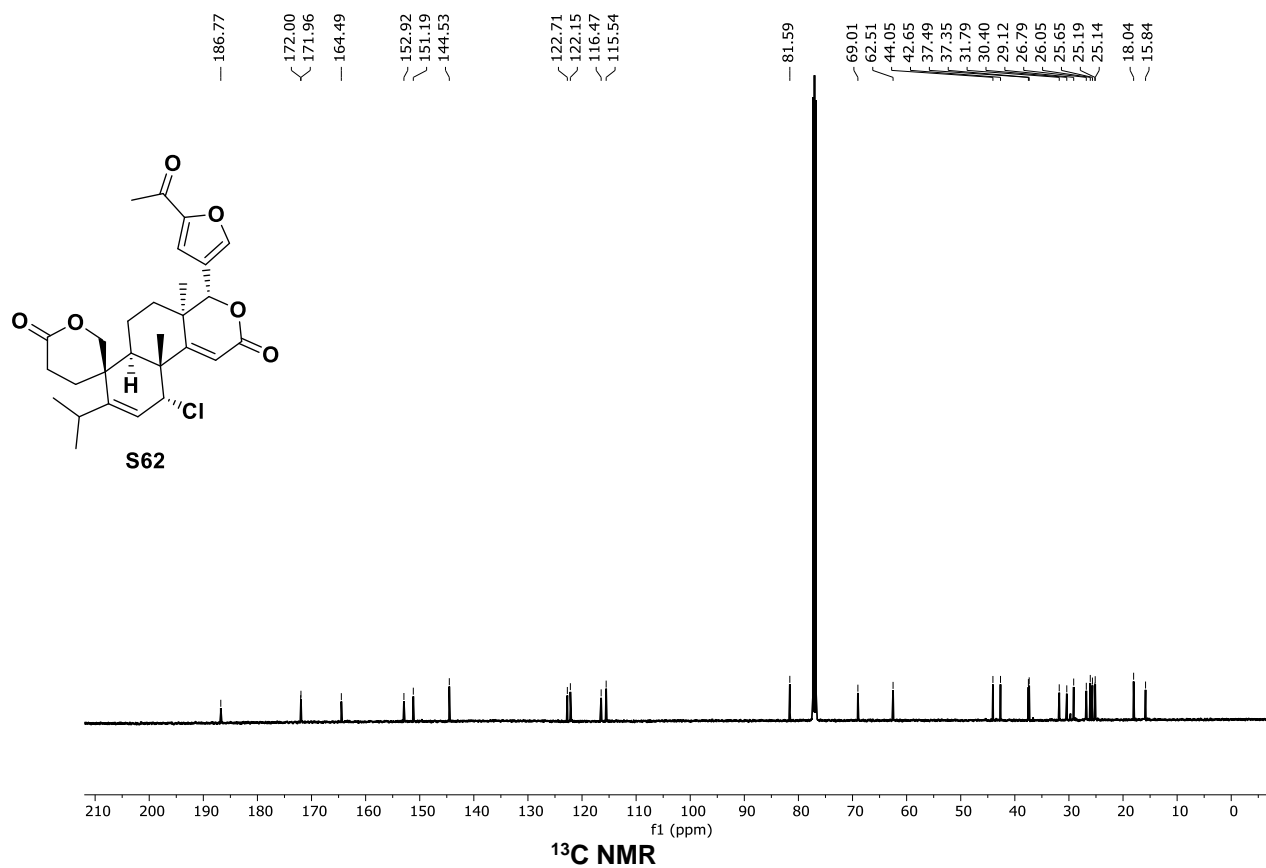

## SUPPORTING INFORMATION

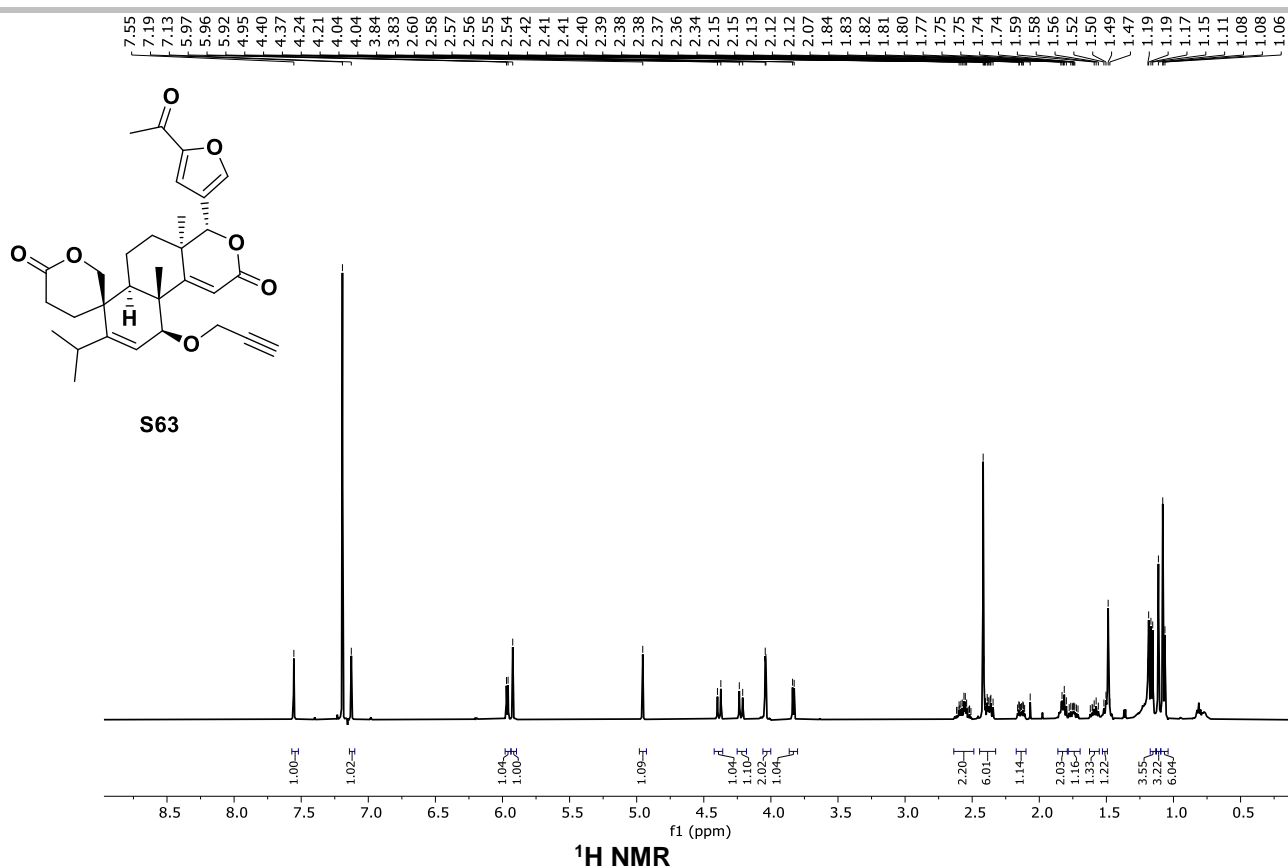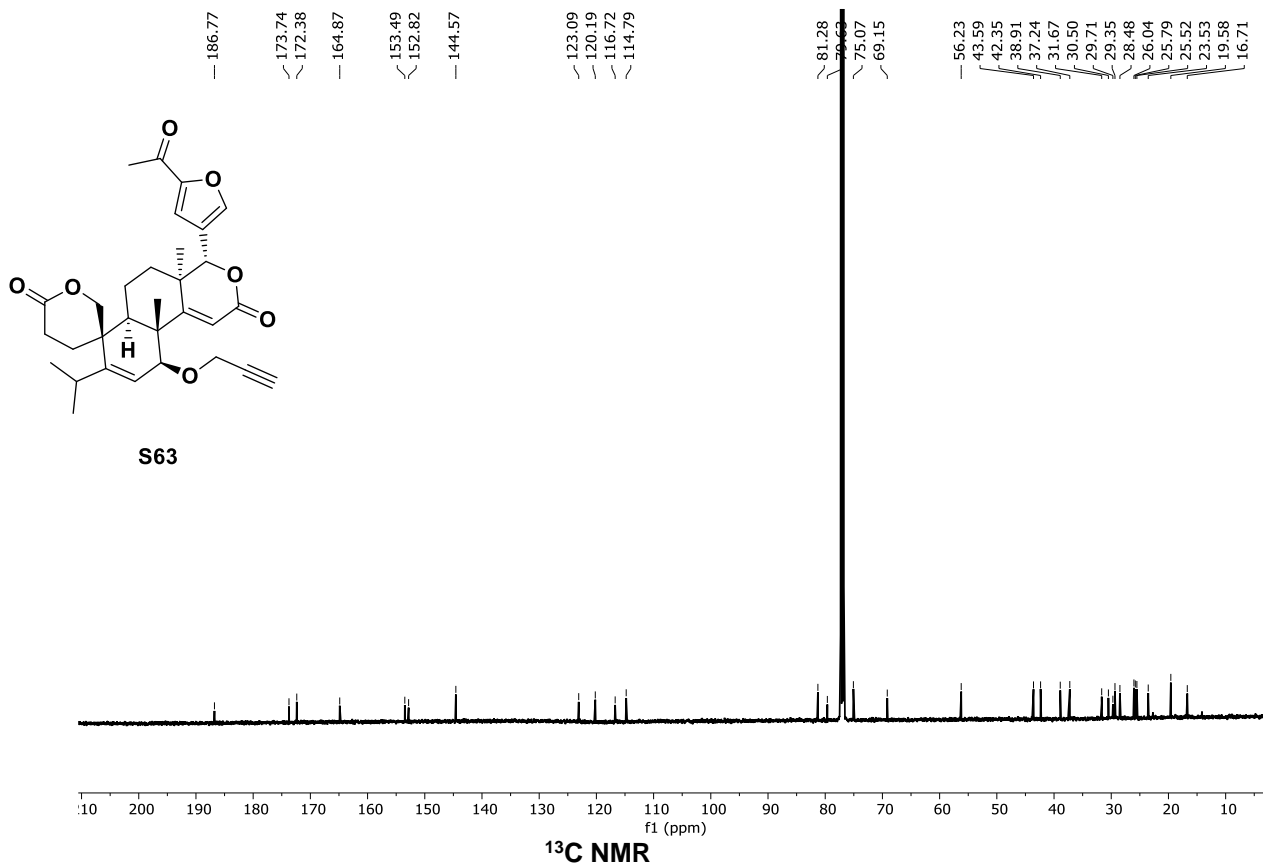

## SUPPORTING INFORMATION

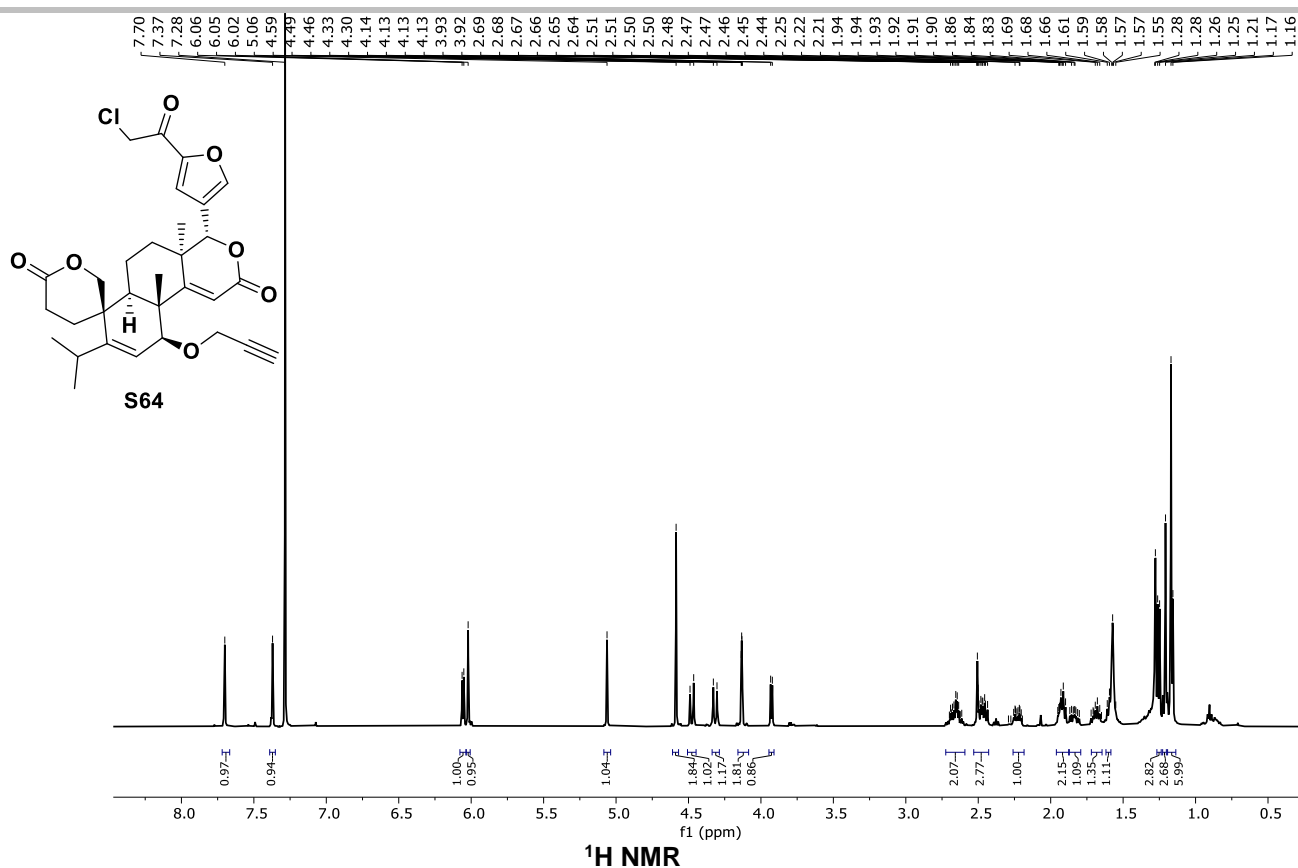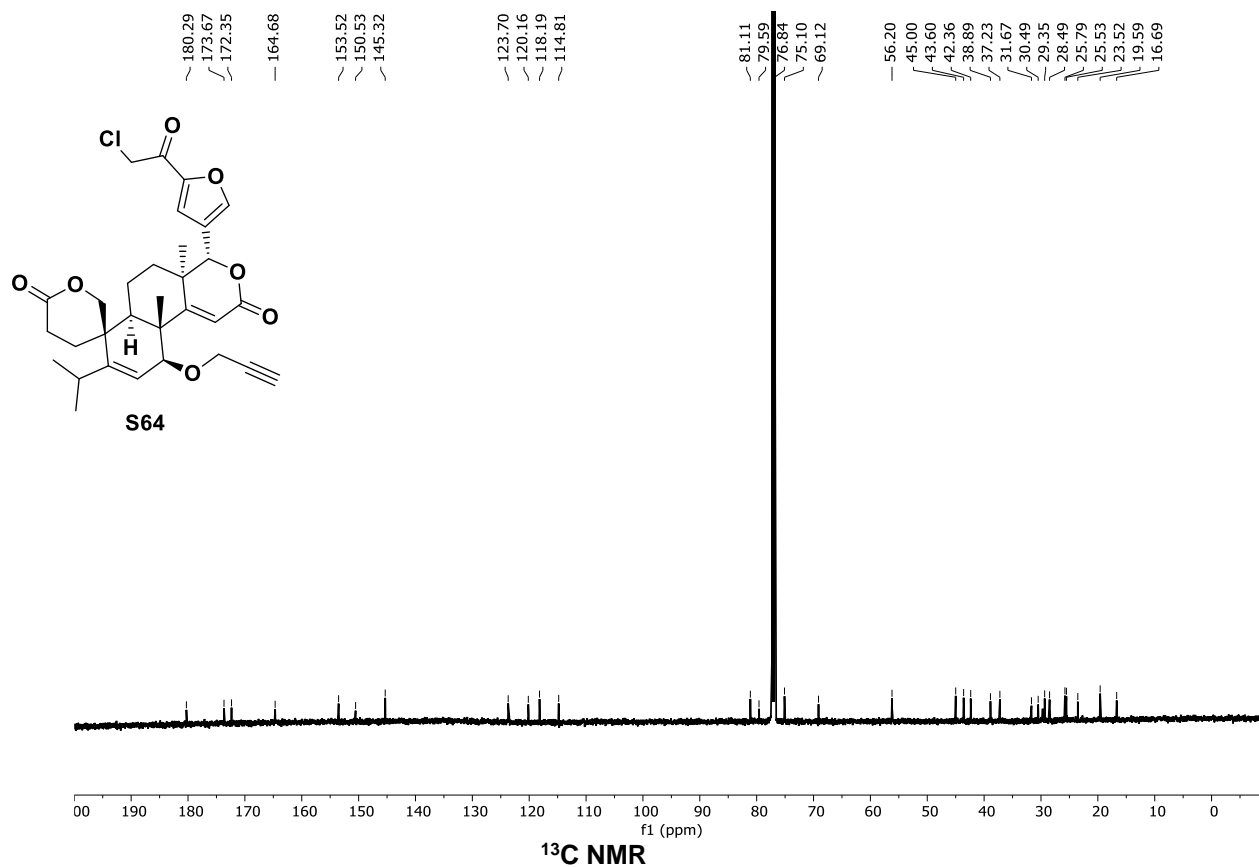

## SUPPORTING INFORMATION

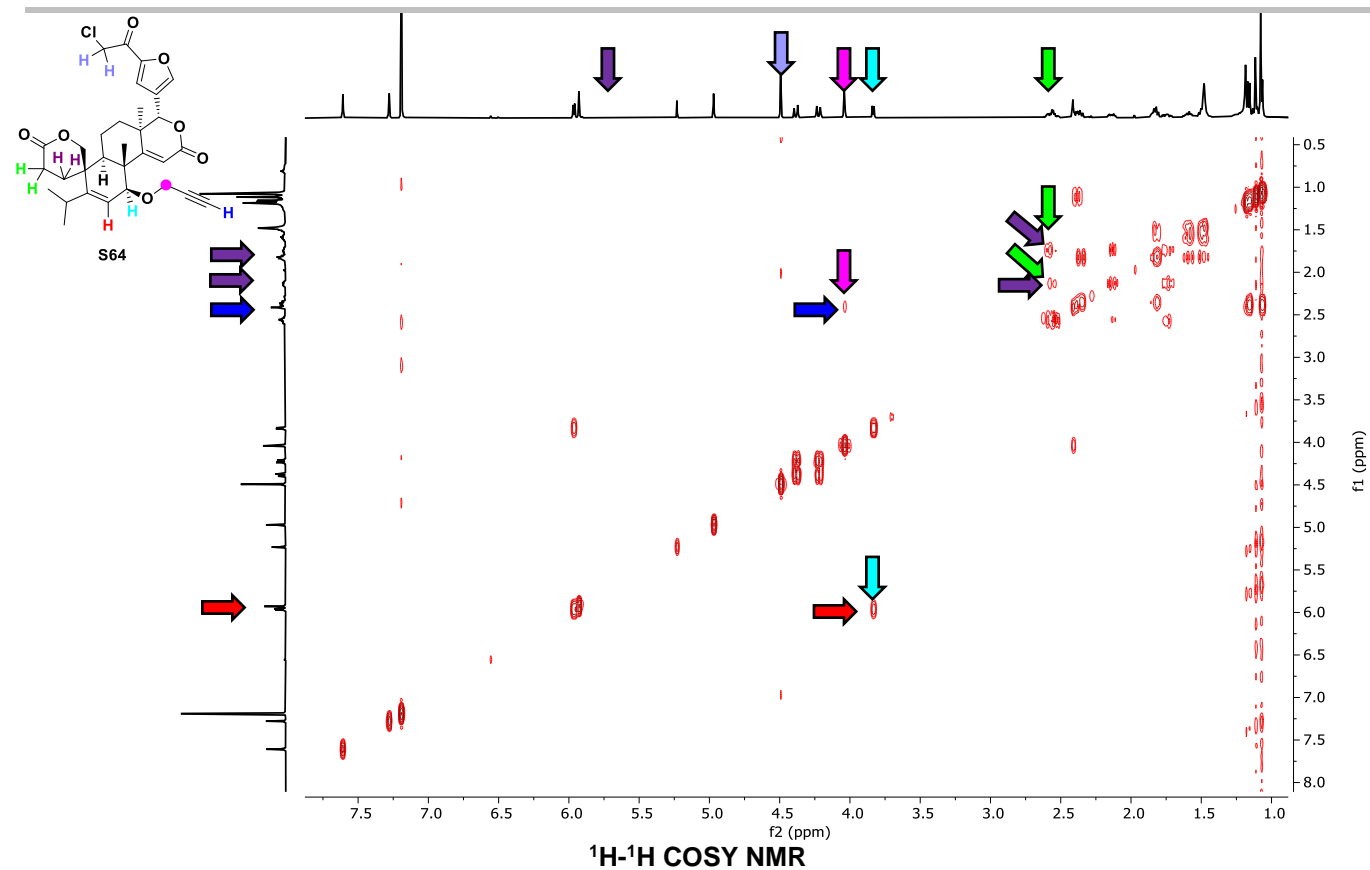

## SUPPORTING INFORMATION

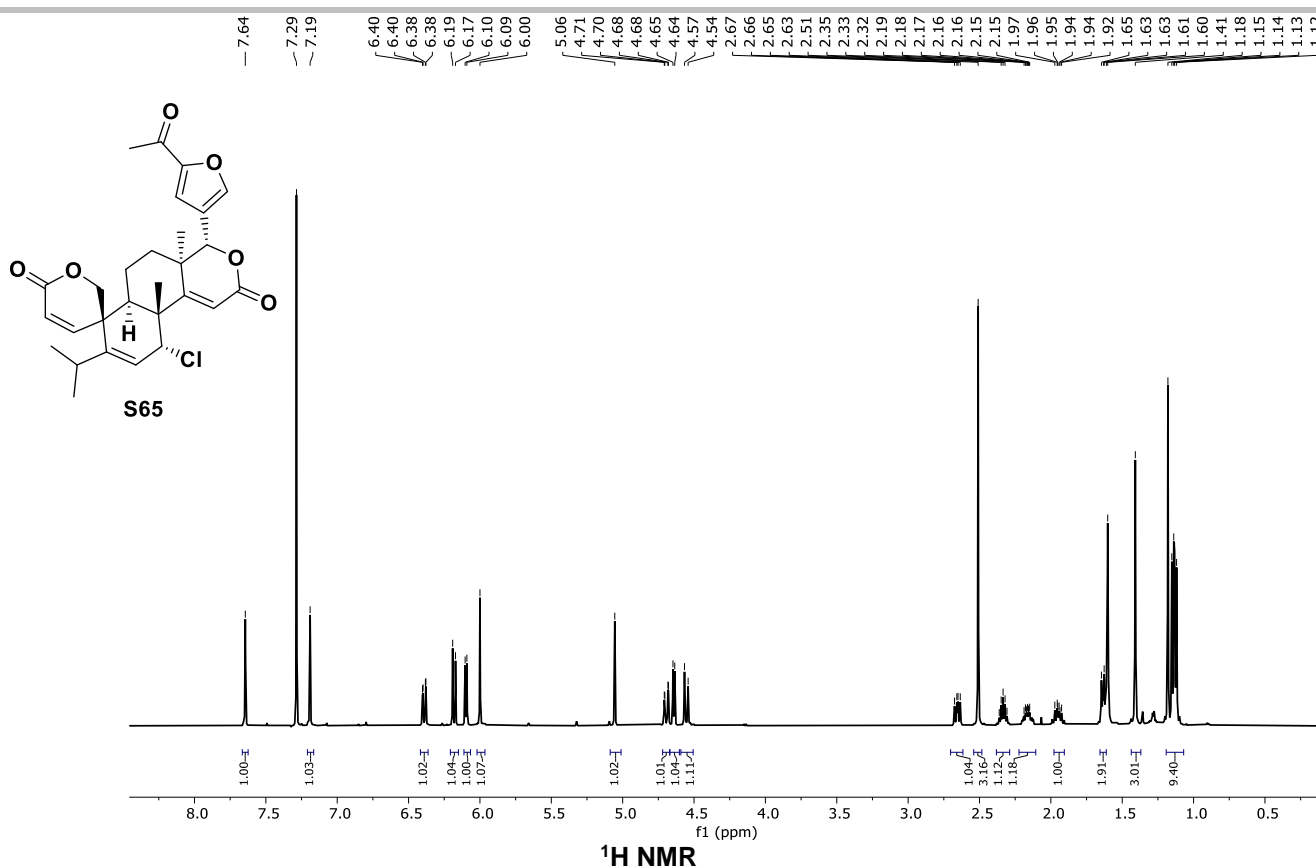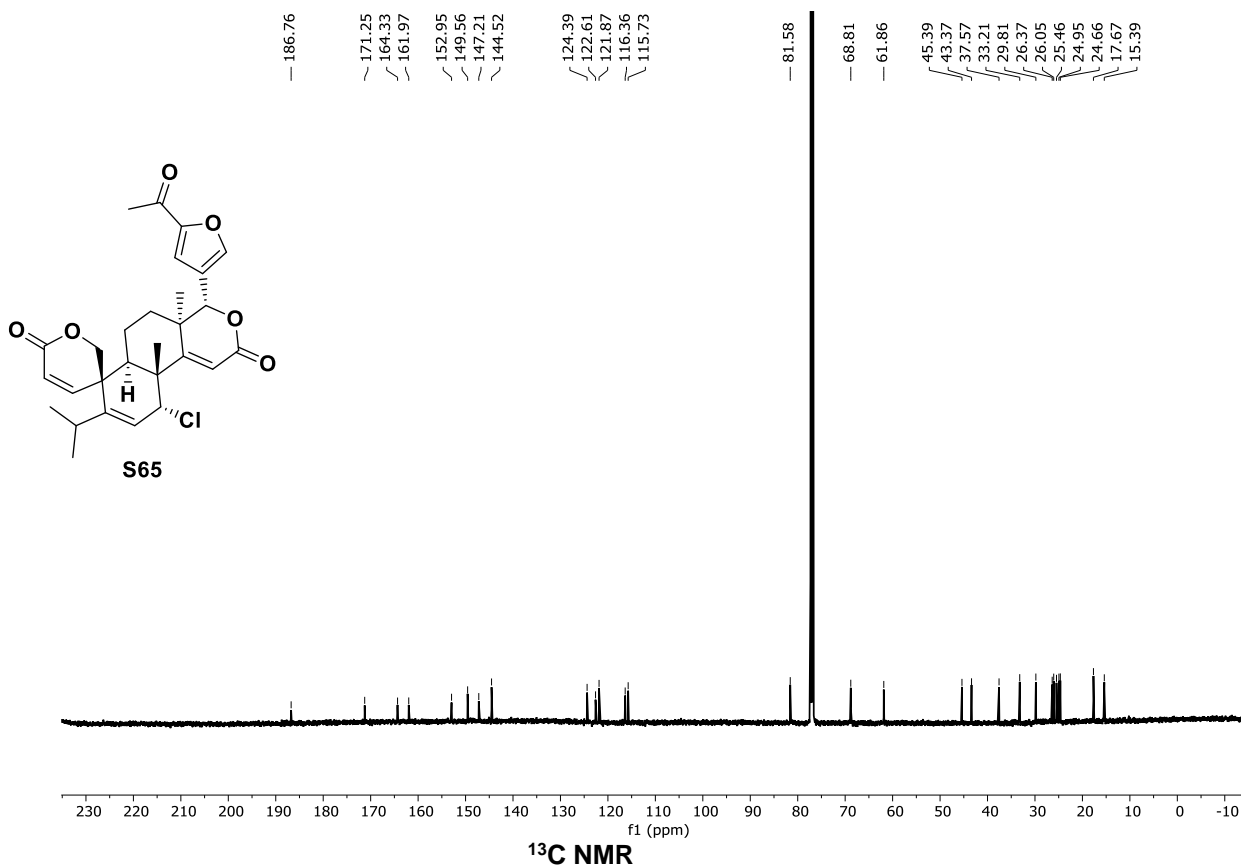

## SUPPORTING INFORMATION

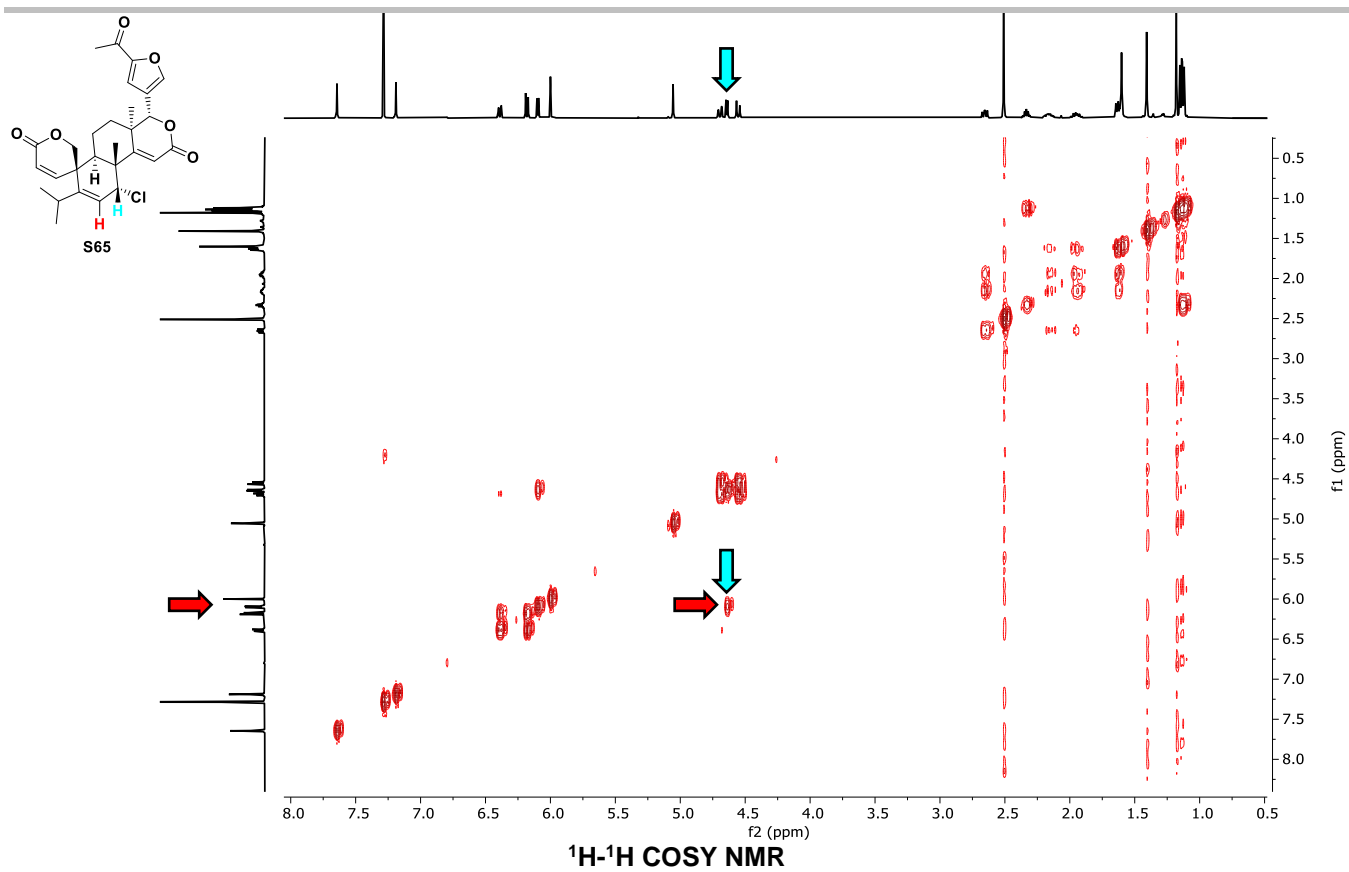



## SUPPORTING INFORMATION

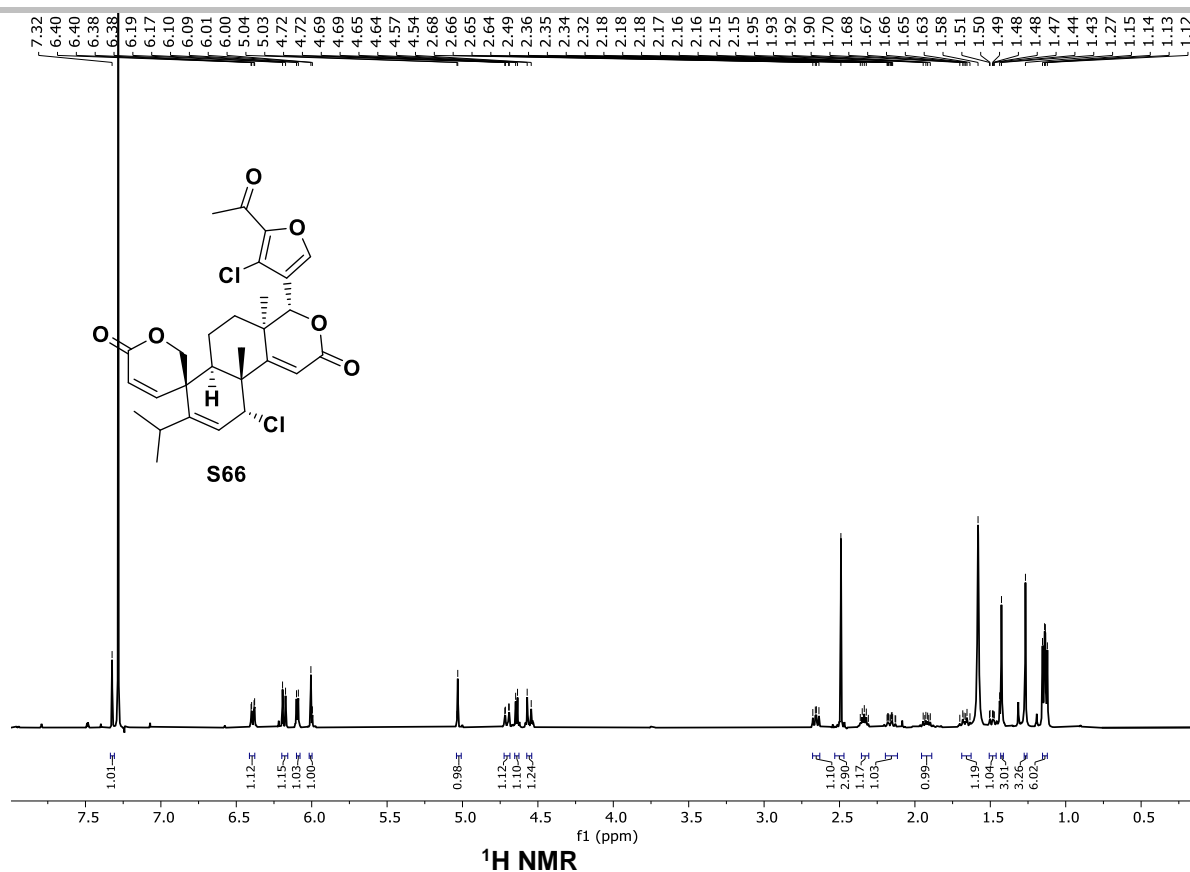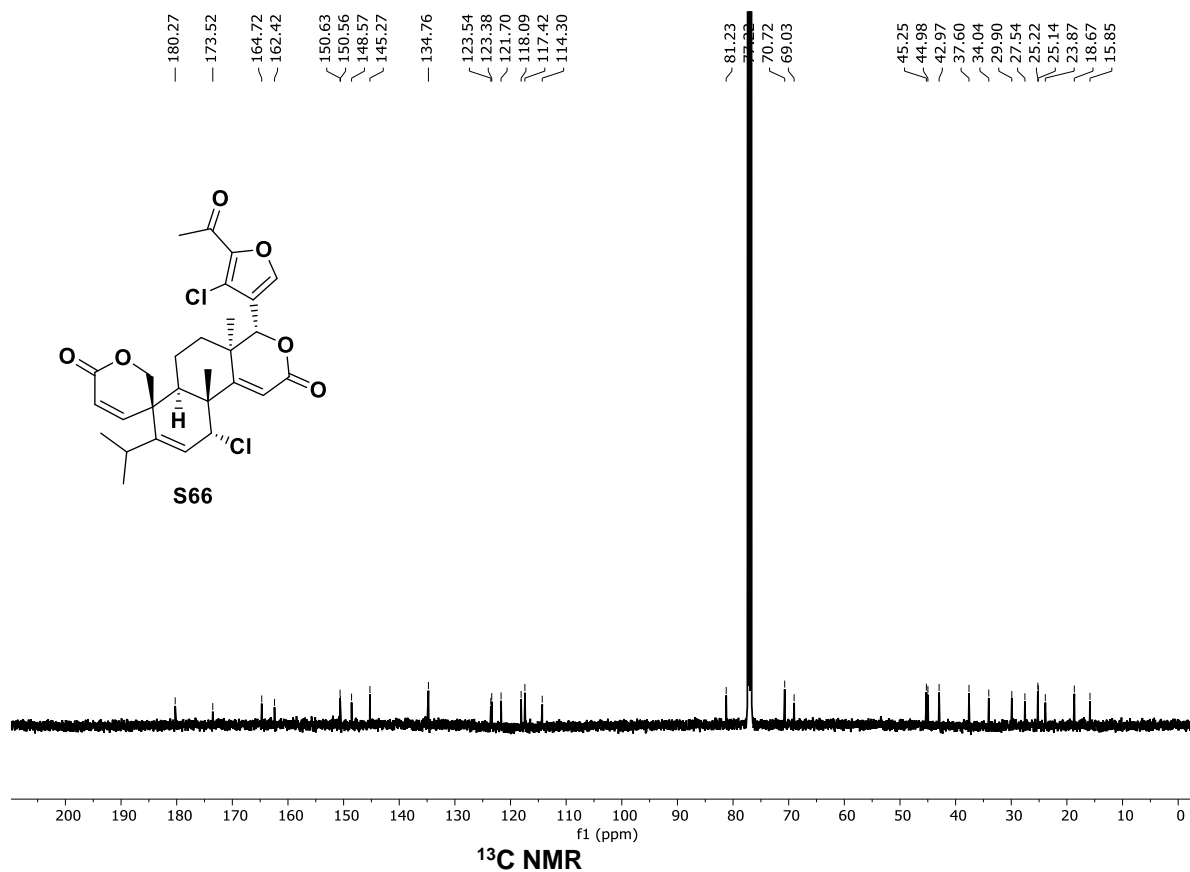

## SUPPORTING INFORMATION

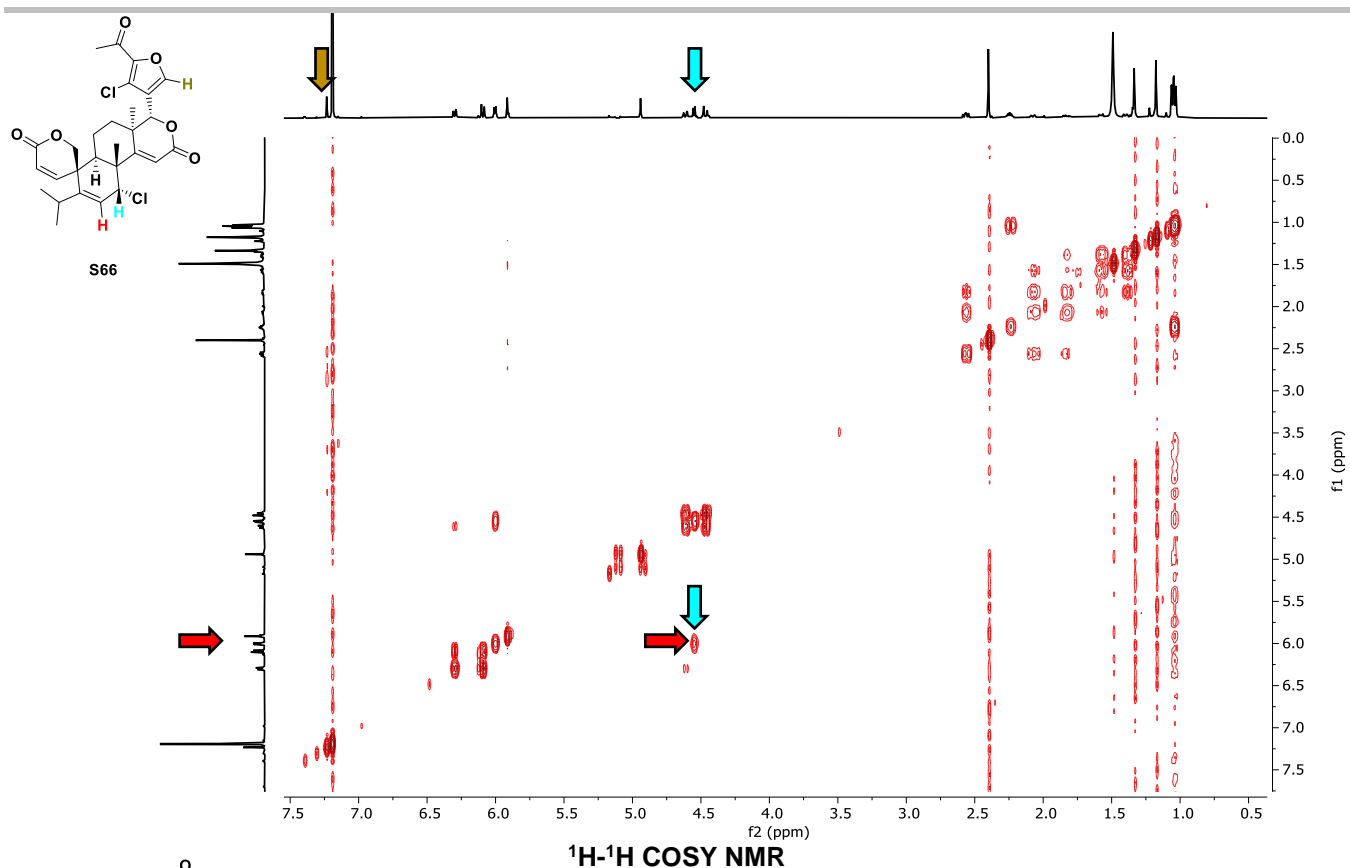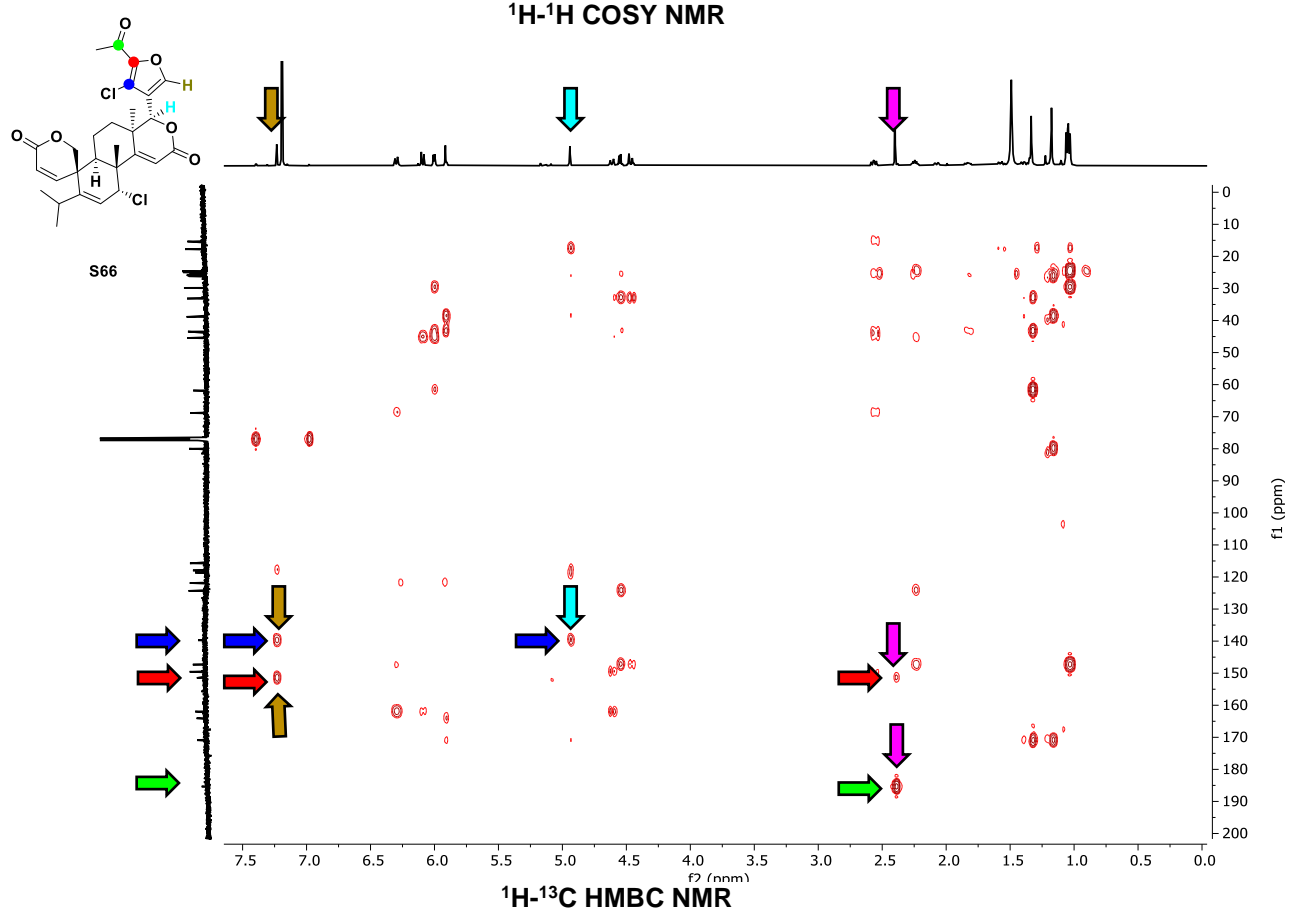

## SUPPORTING INFORMATION

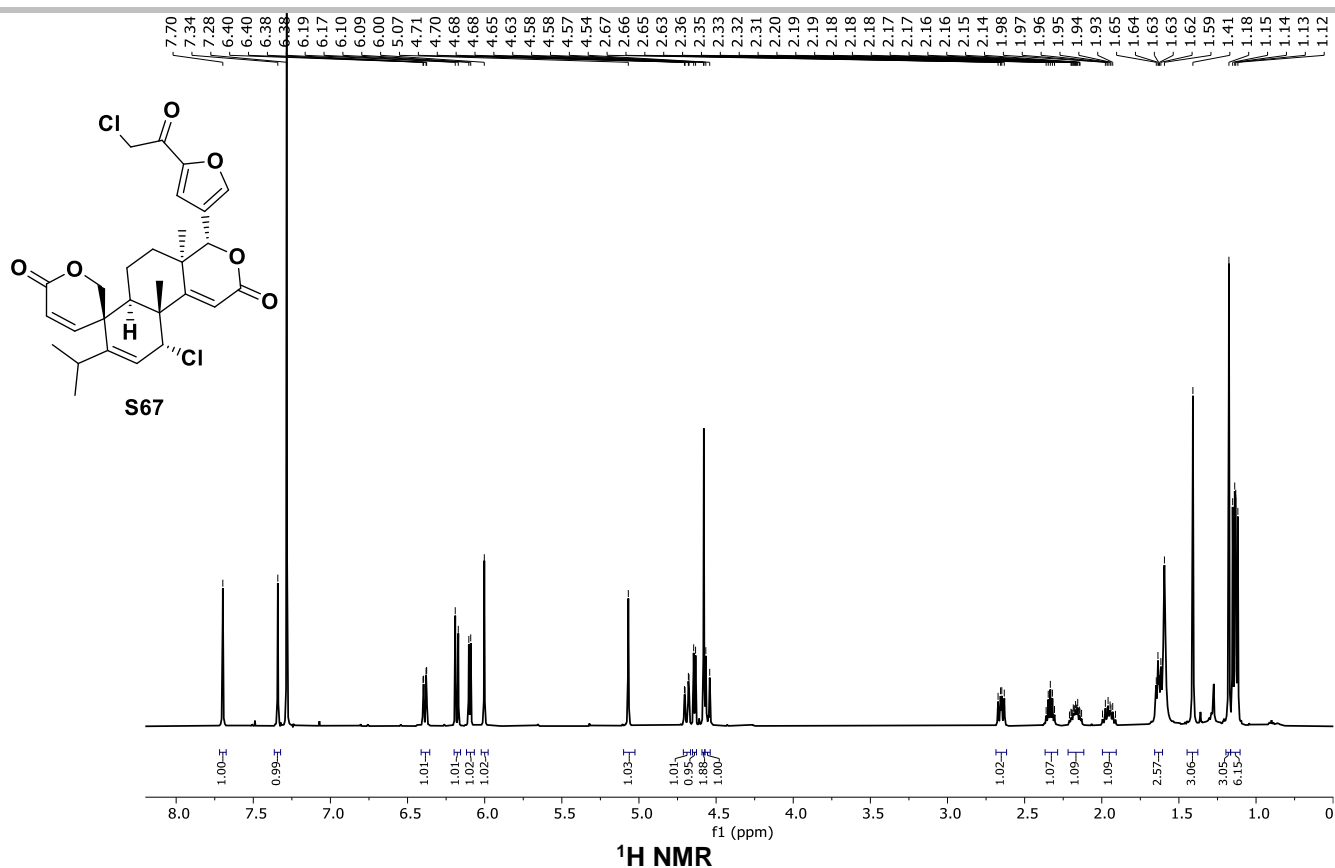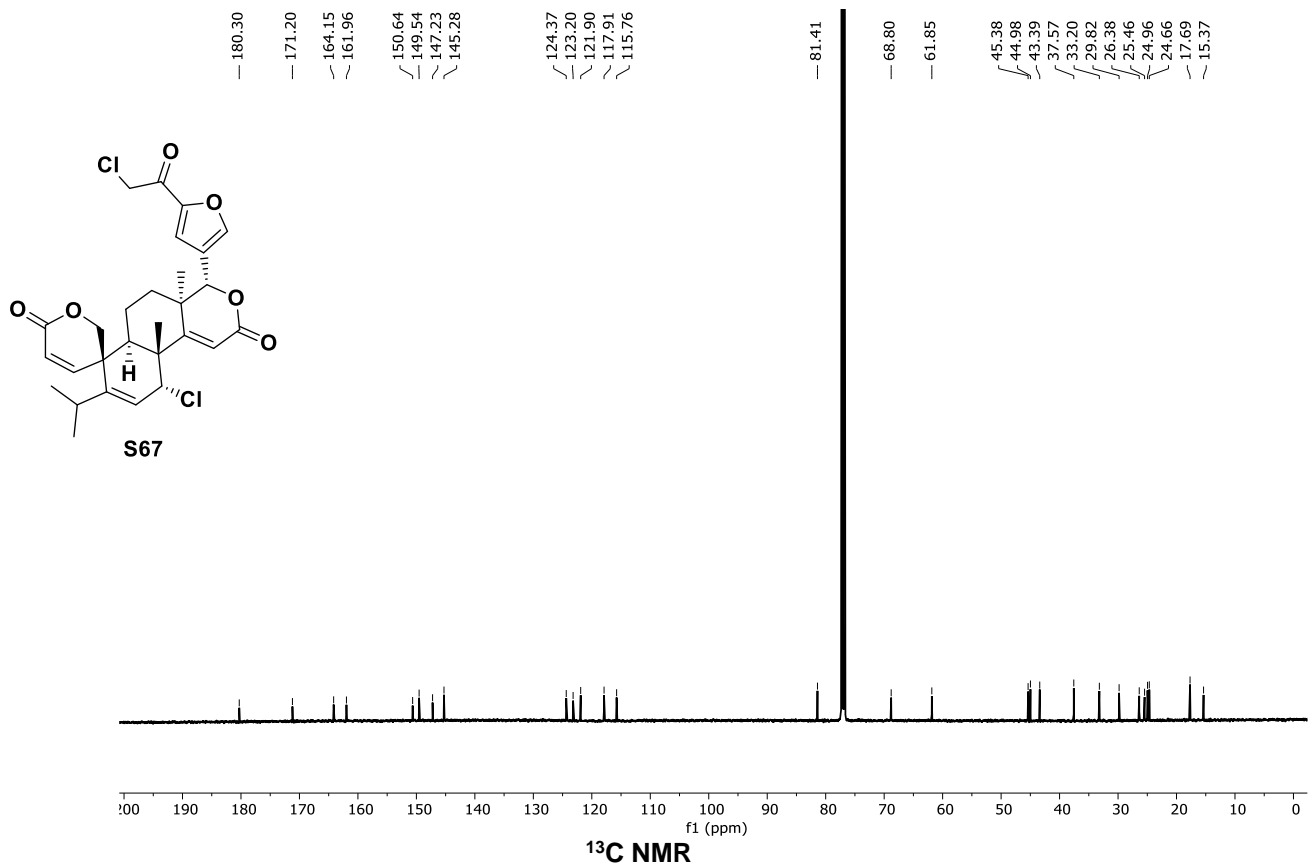

## SUPPORTING INFORMATION

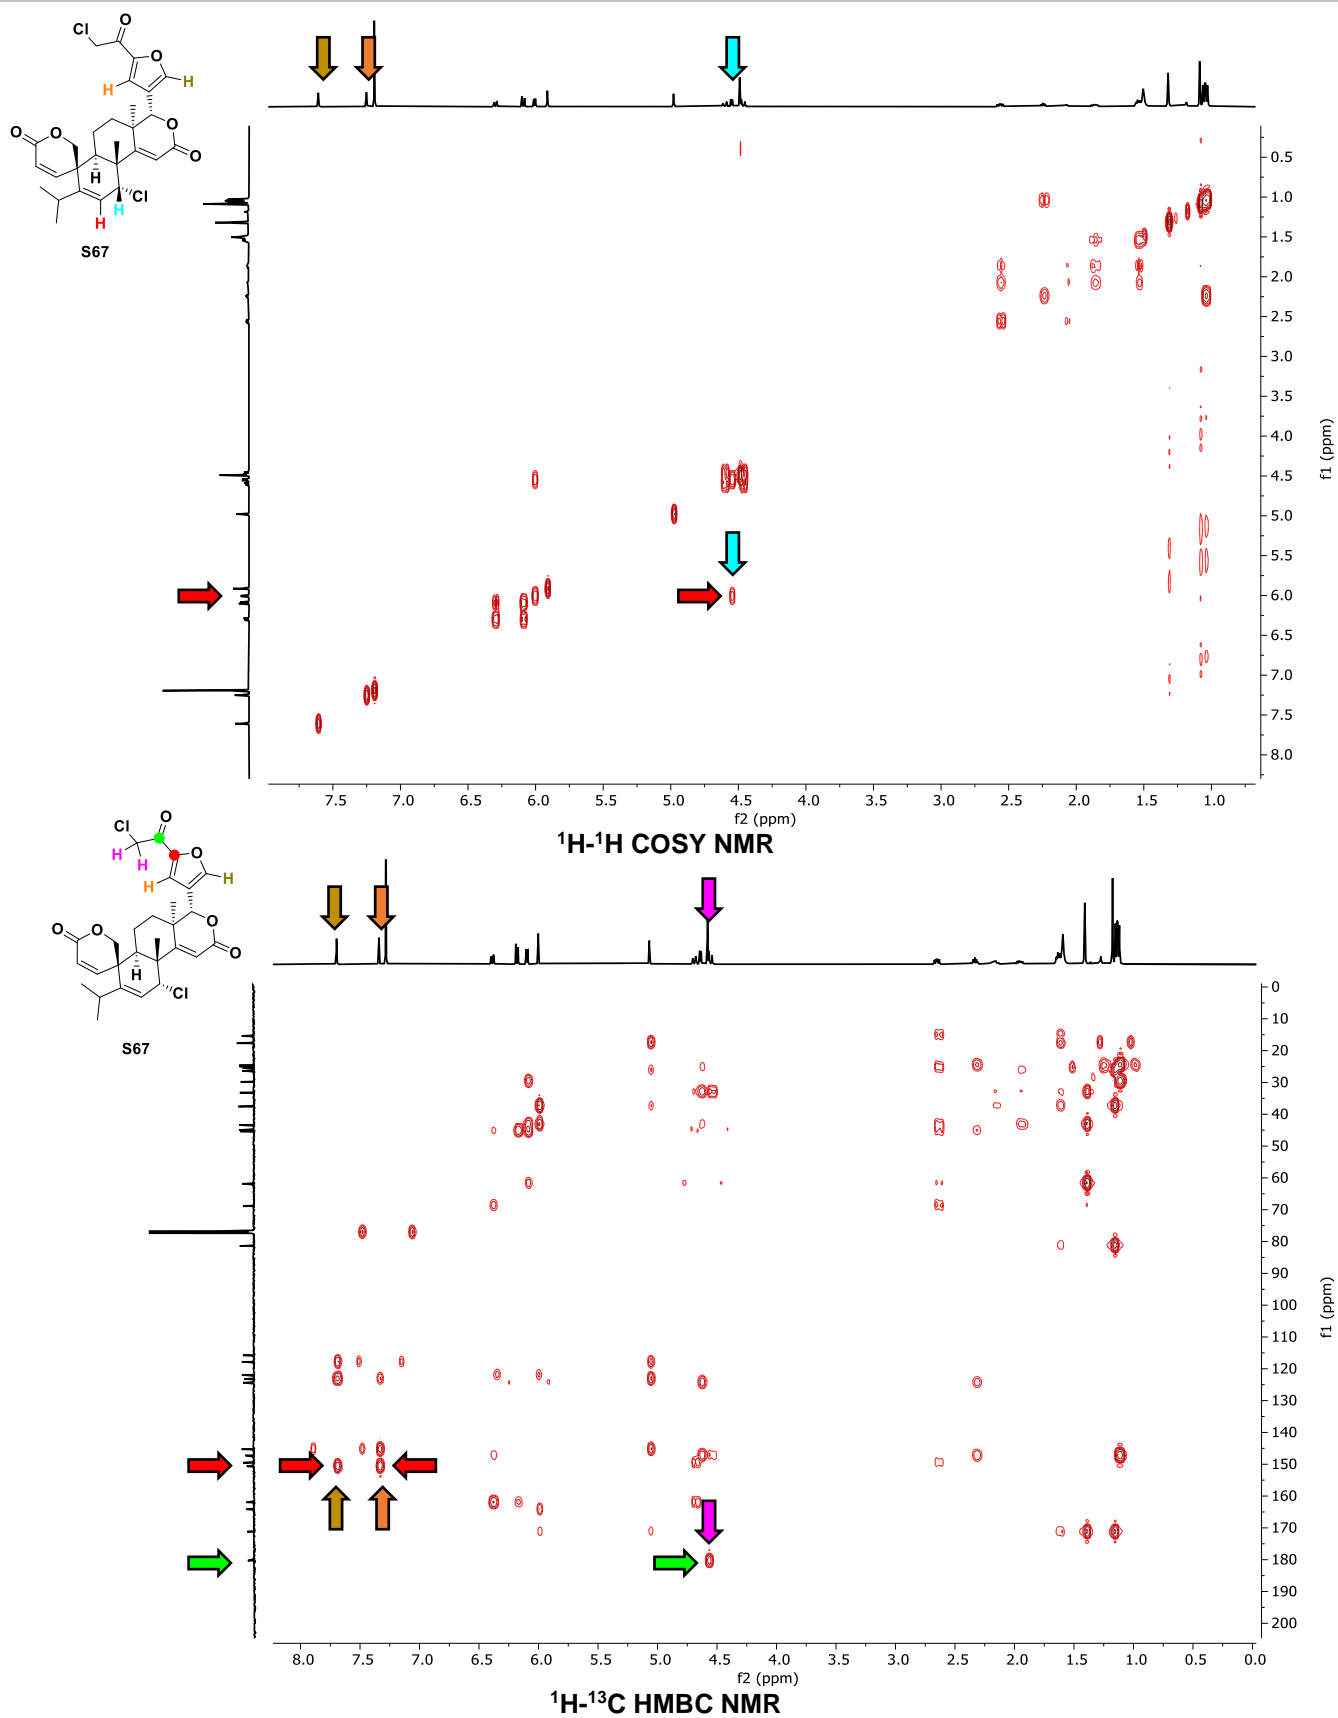

## SUPPORTING INFORMATION

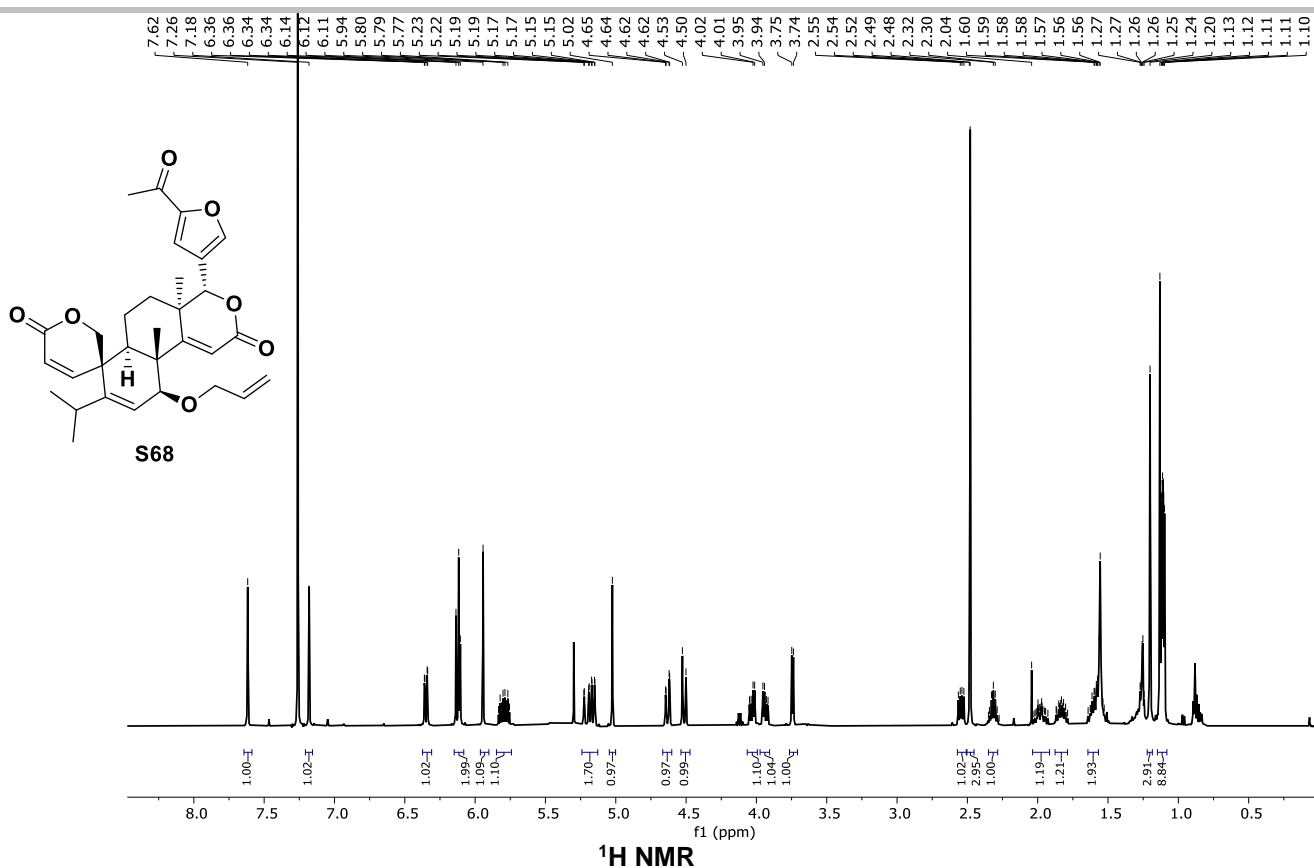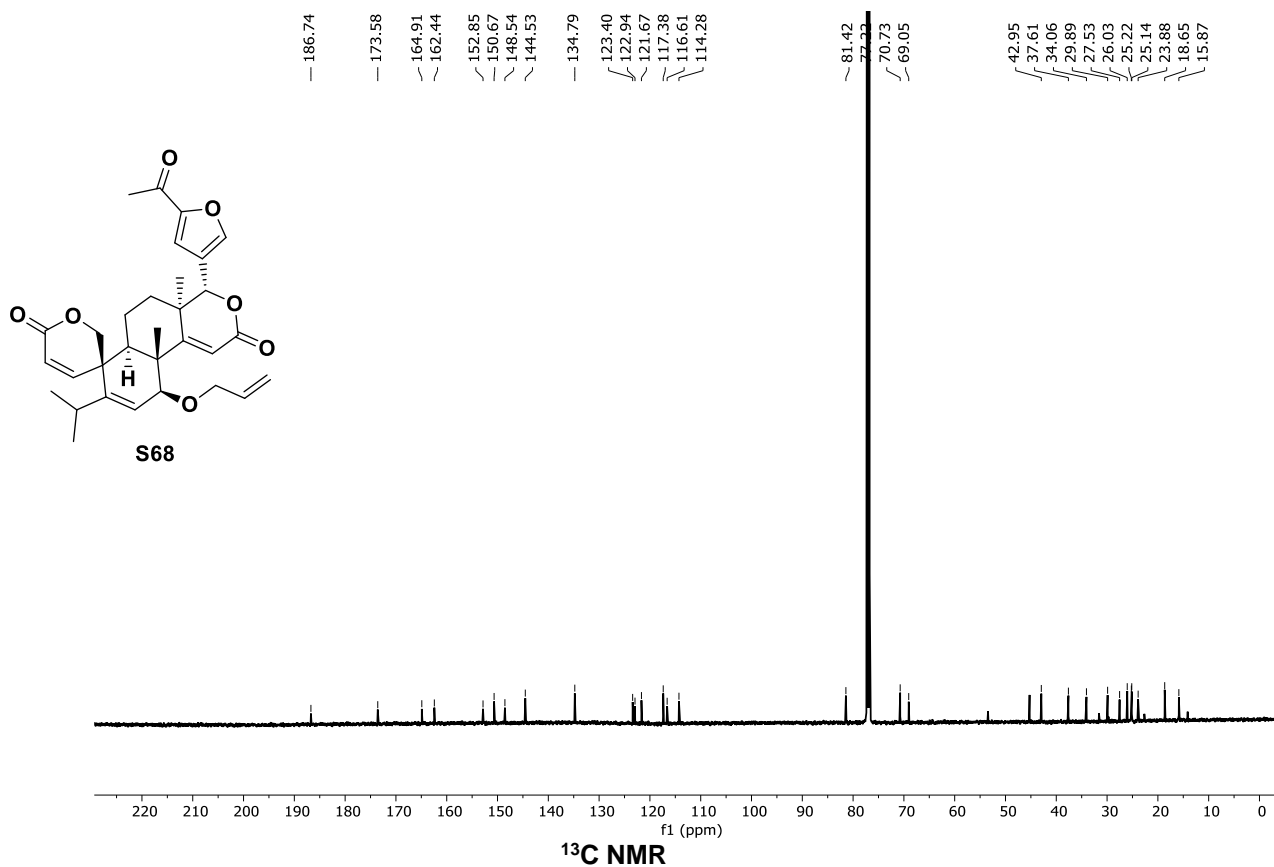

## SUPPORTING INFORMATION

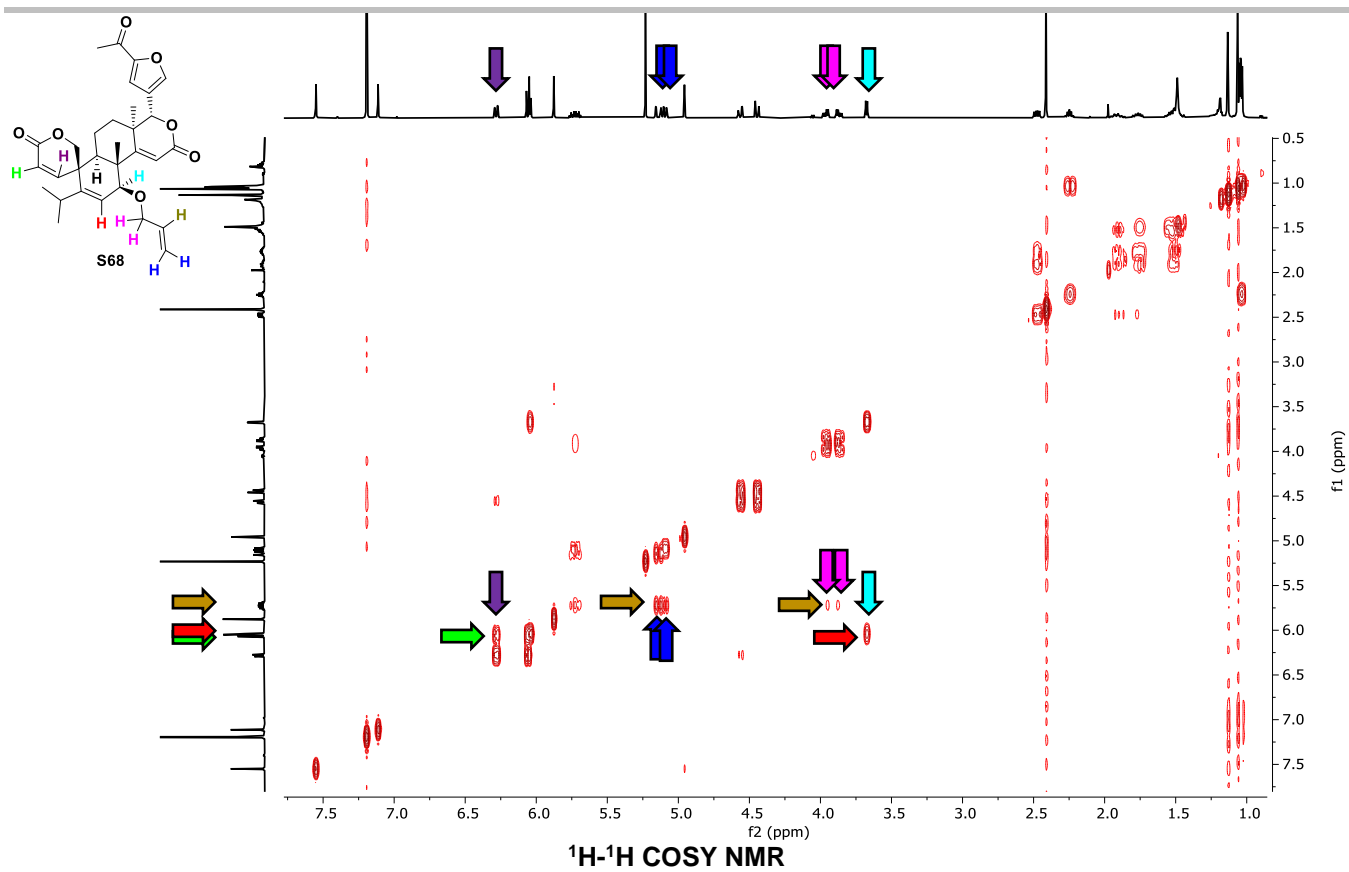



## SUPPORTING INFORMATION

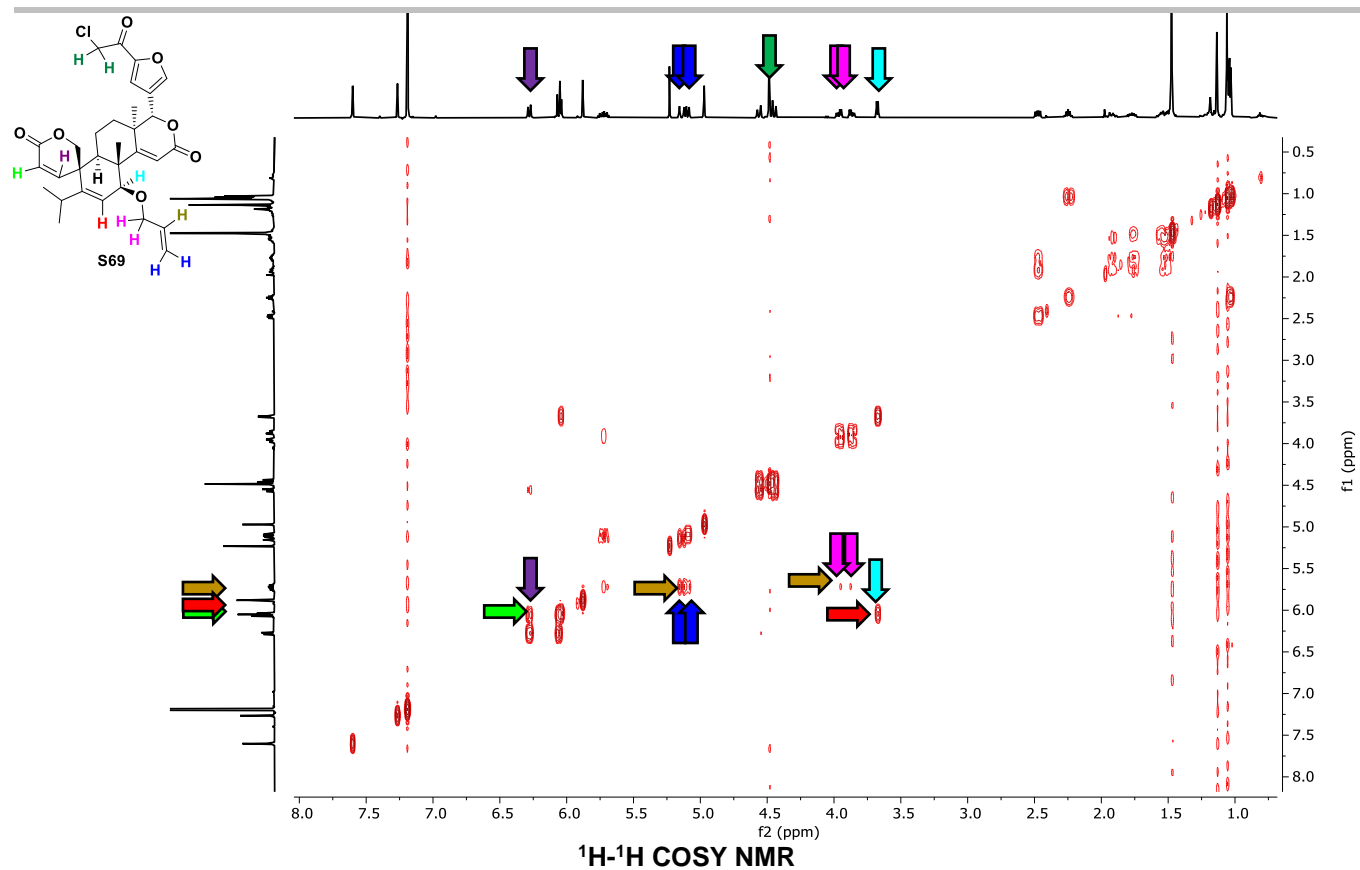



## SUPPORTING INFORMATION

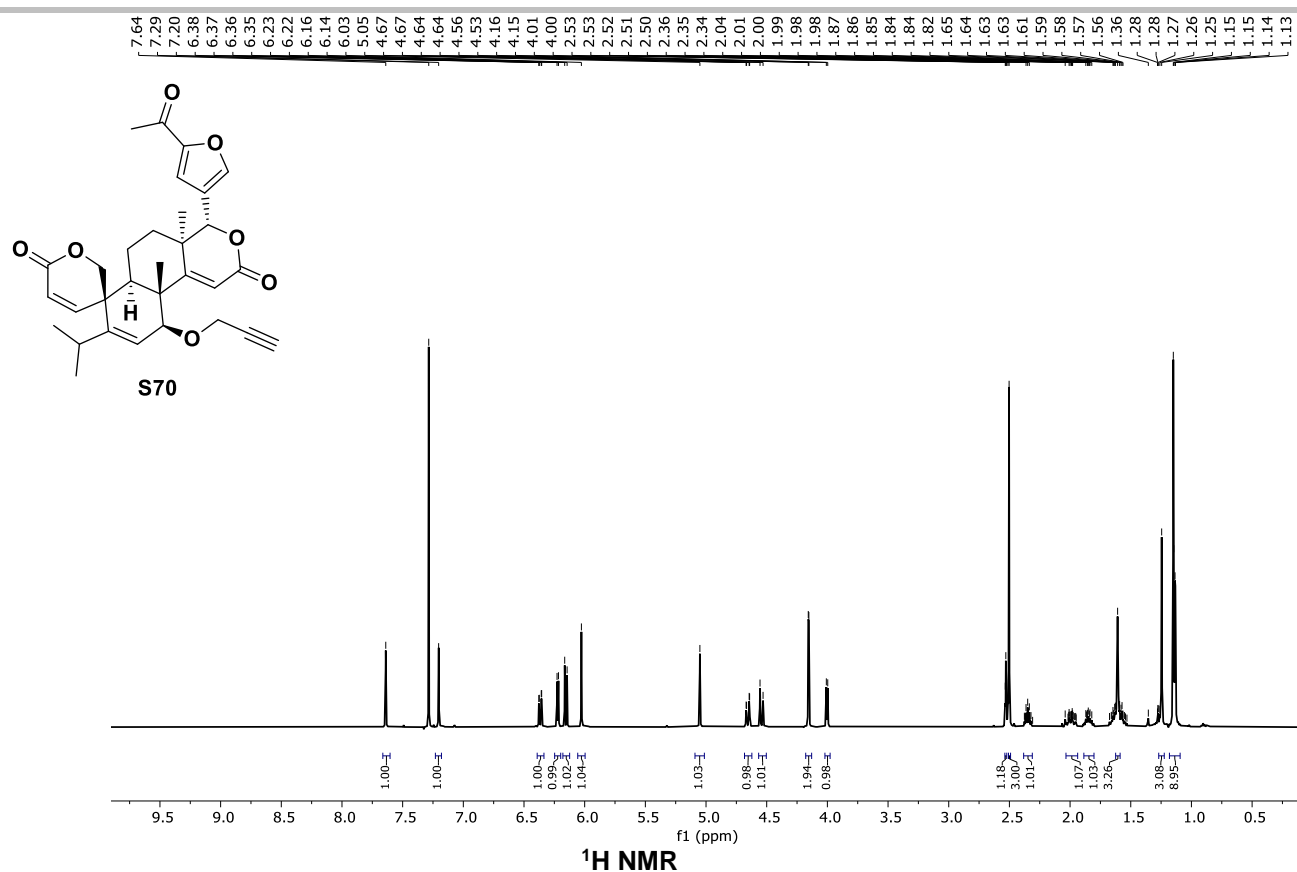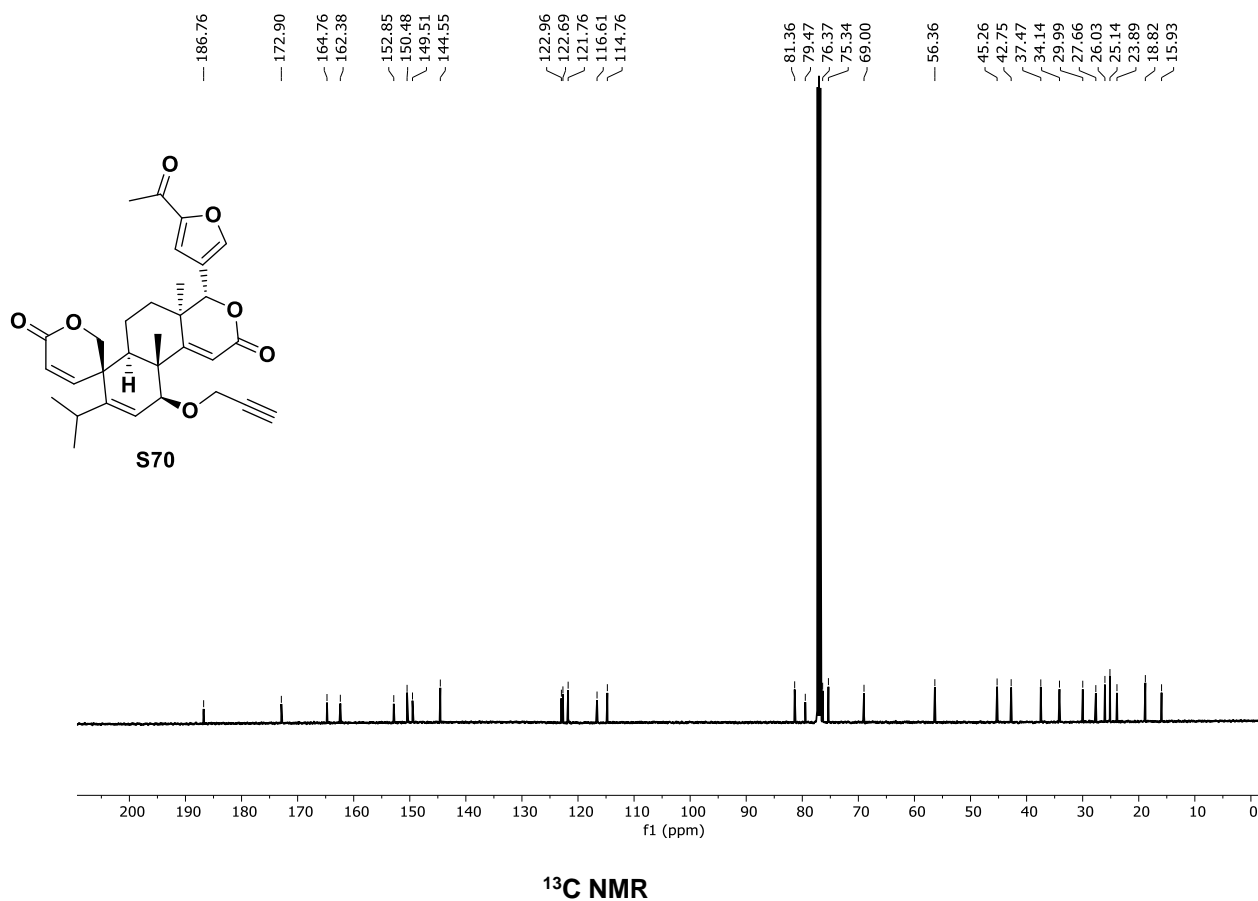

## SUPPORTING INFORMATION

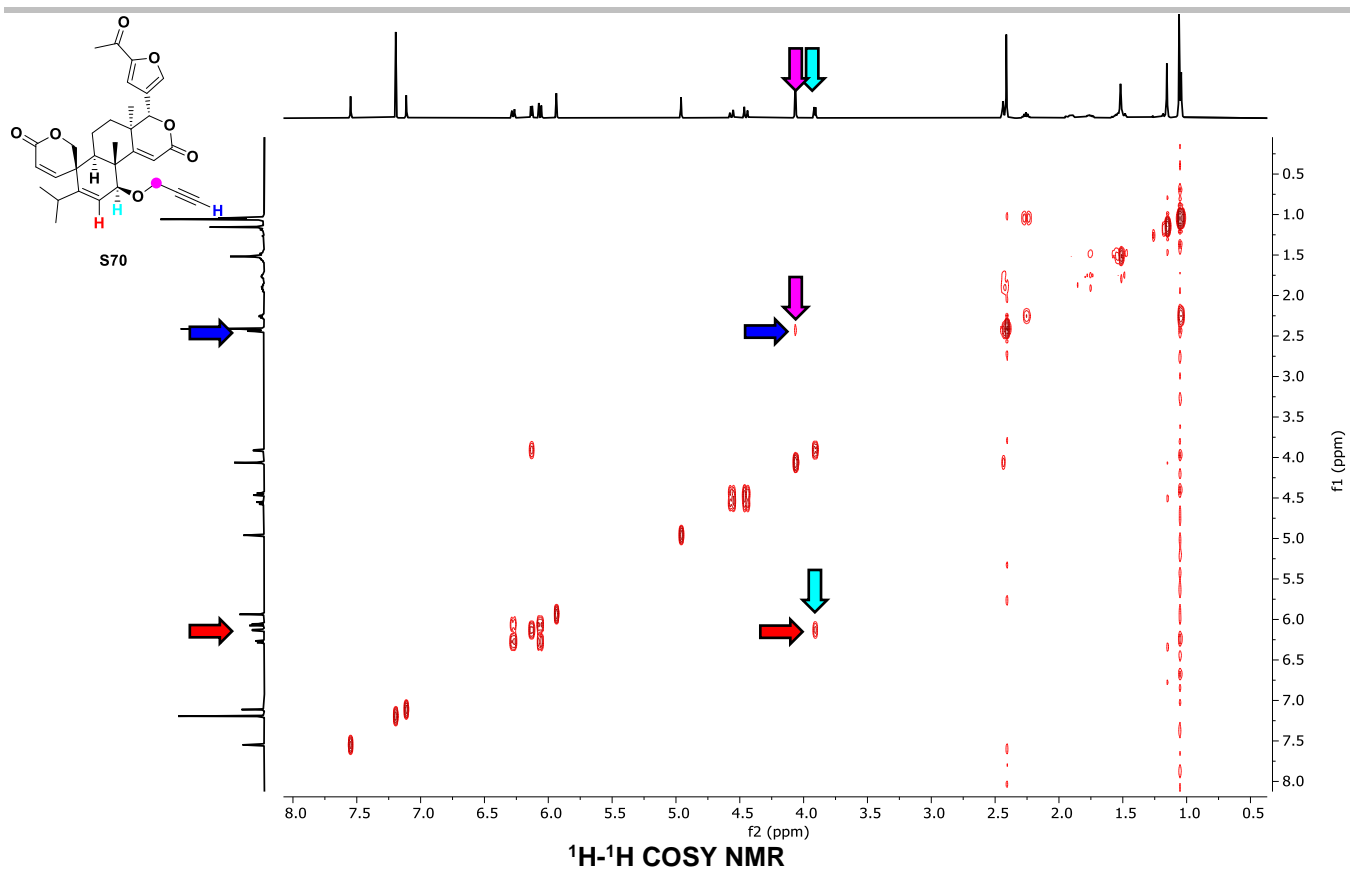

## SUPPORTING INFORMATION

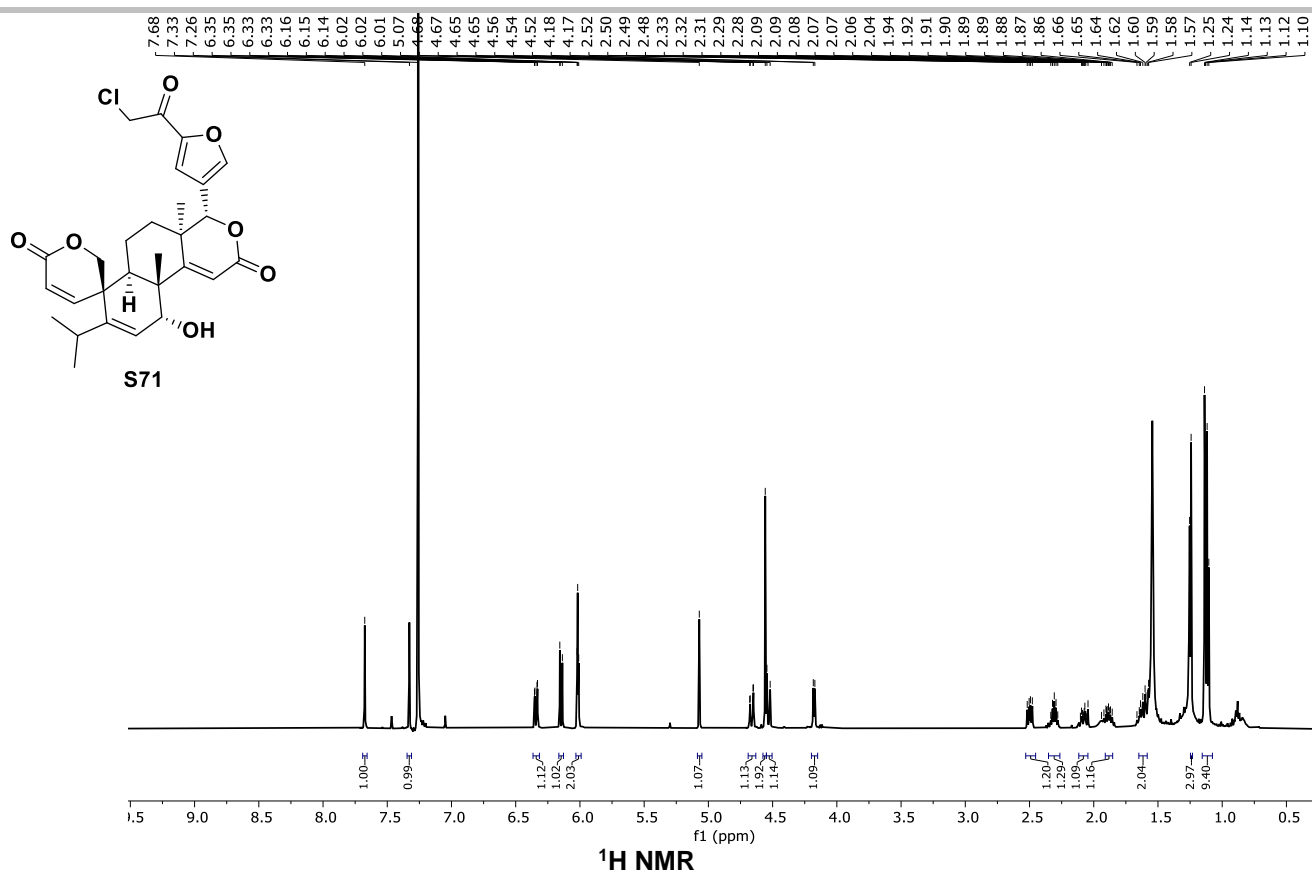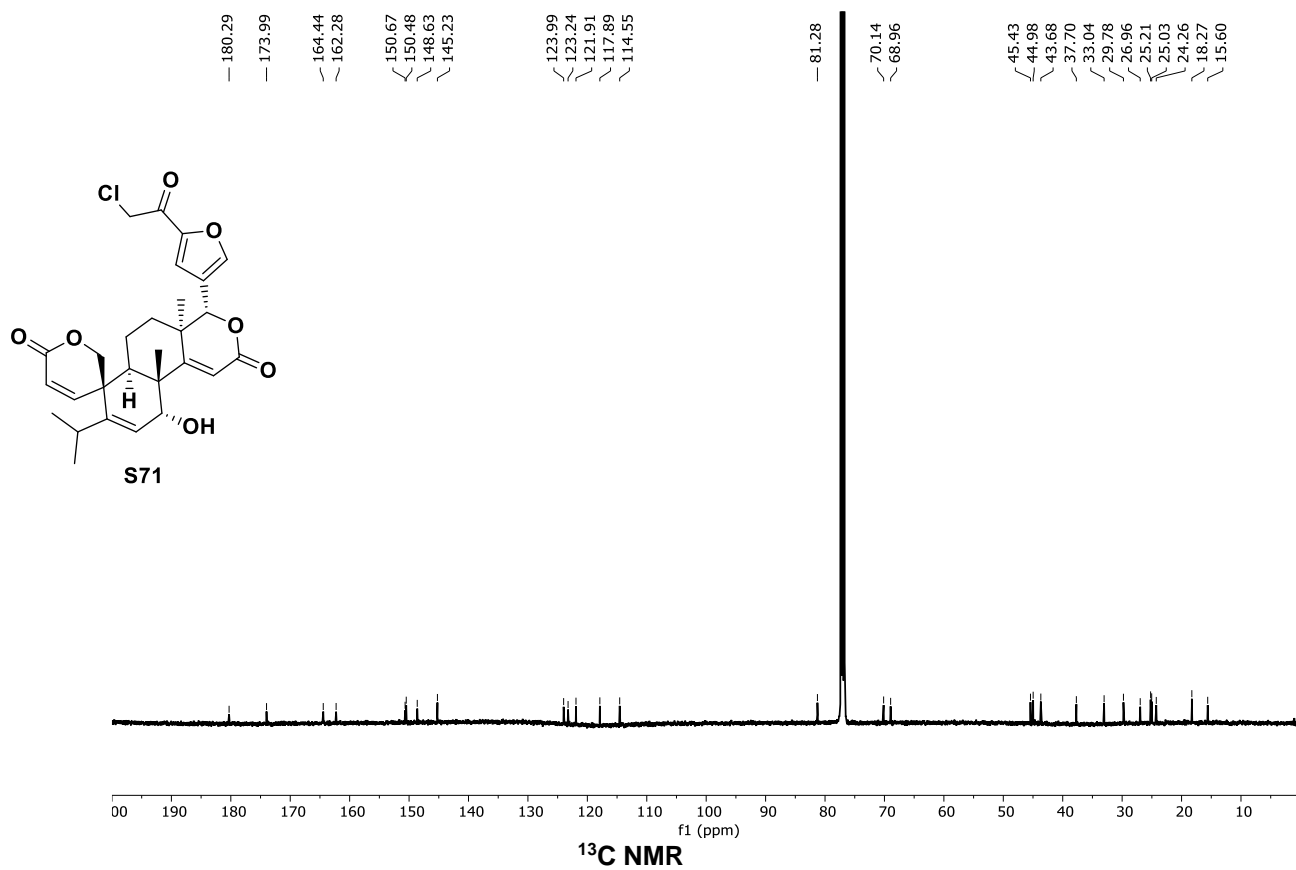

## SUPPORTING INFORMATION

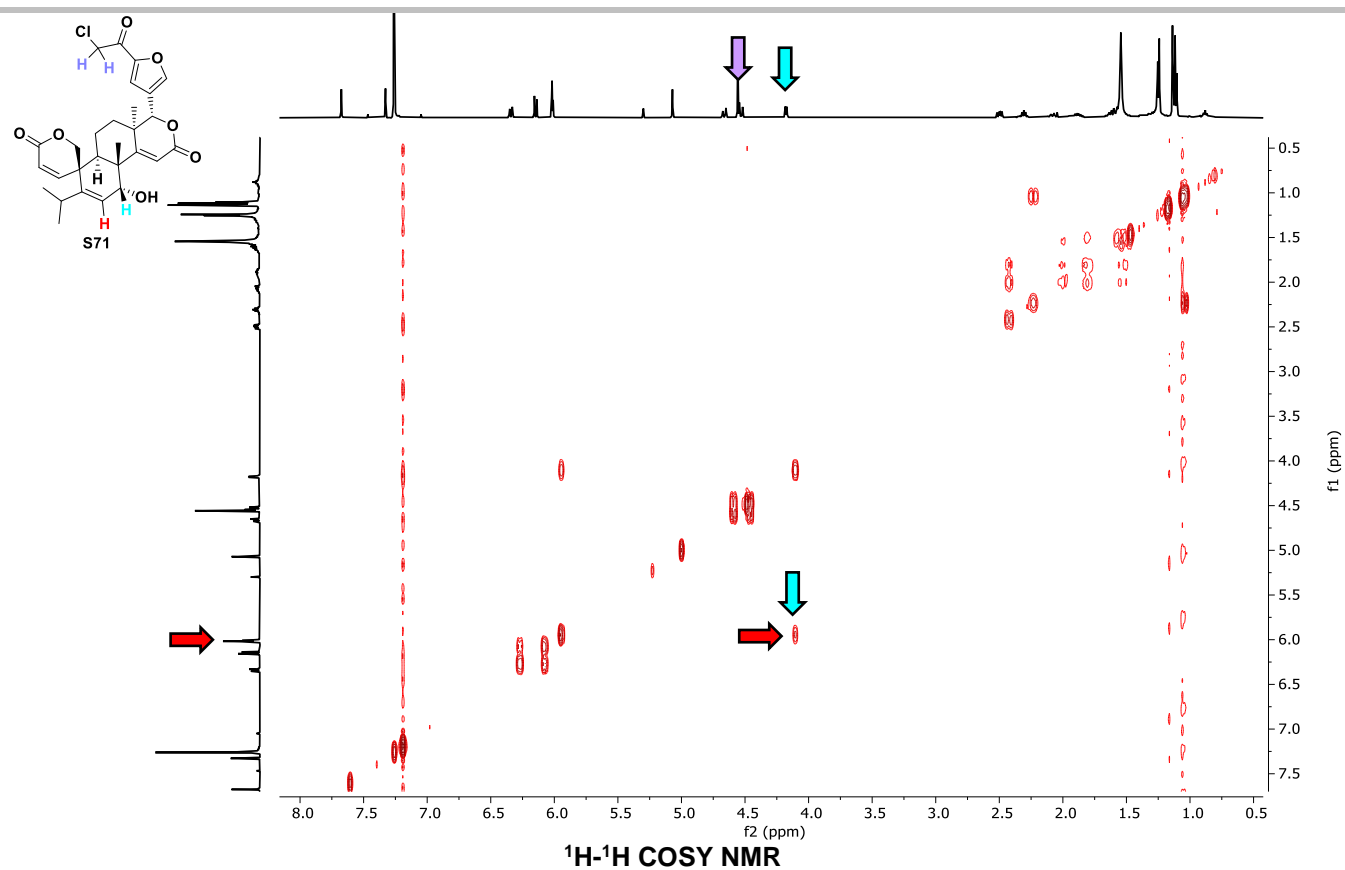

## SUPPORTING INFORMATION

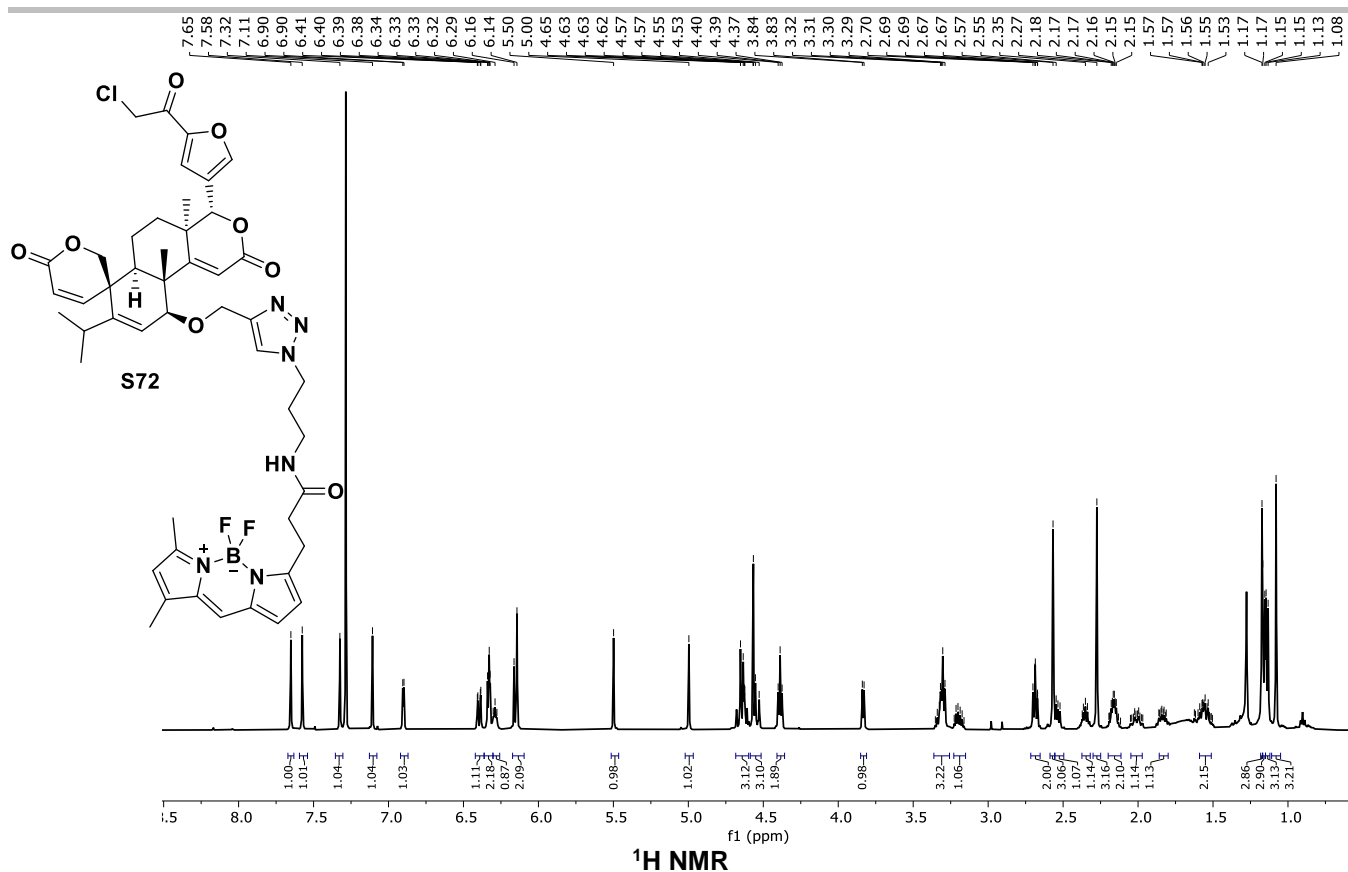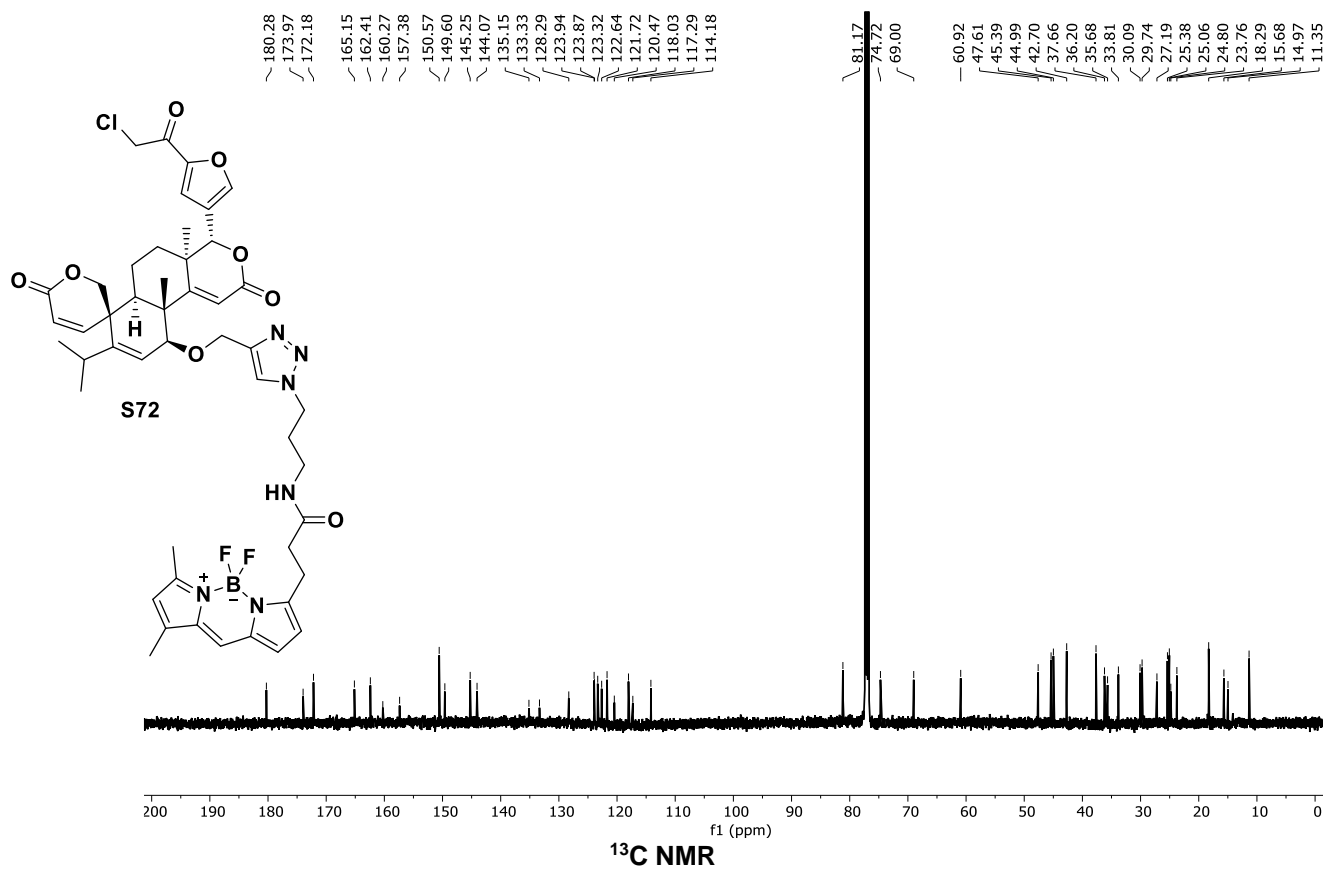

## SUPPORTING INFORMATION

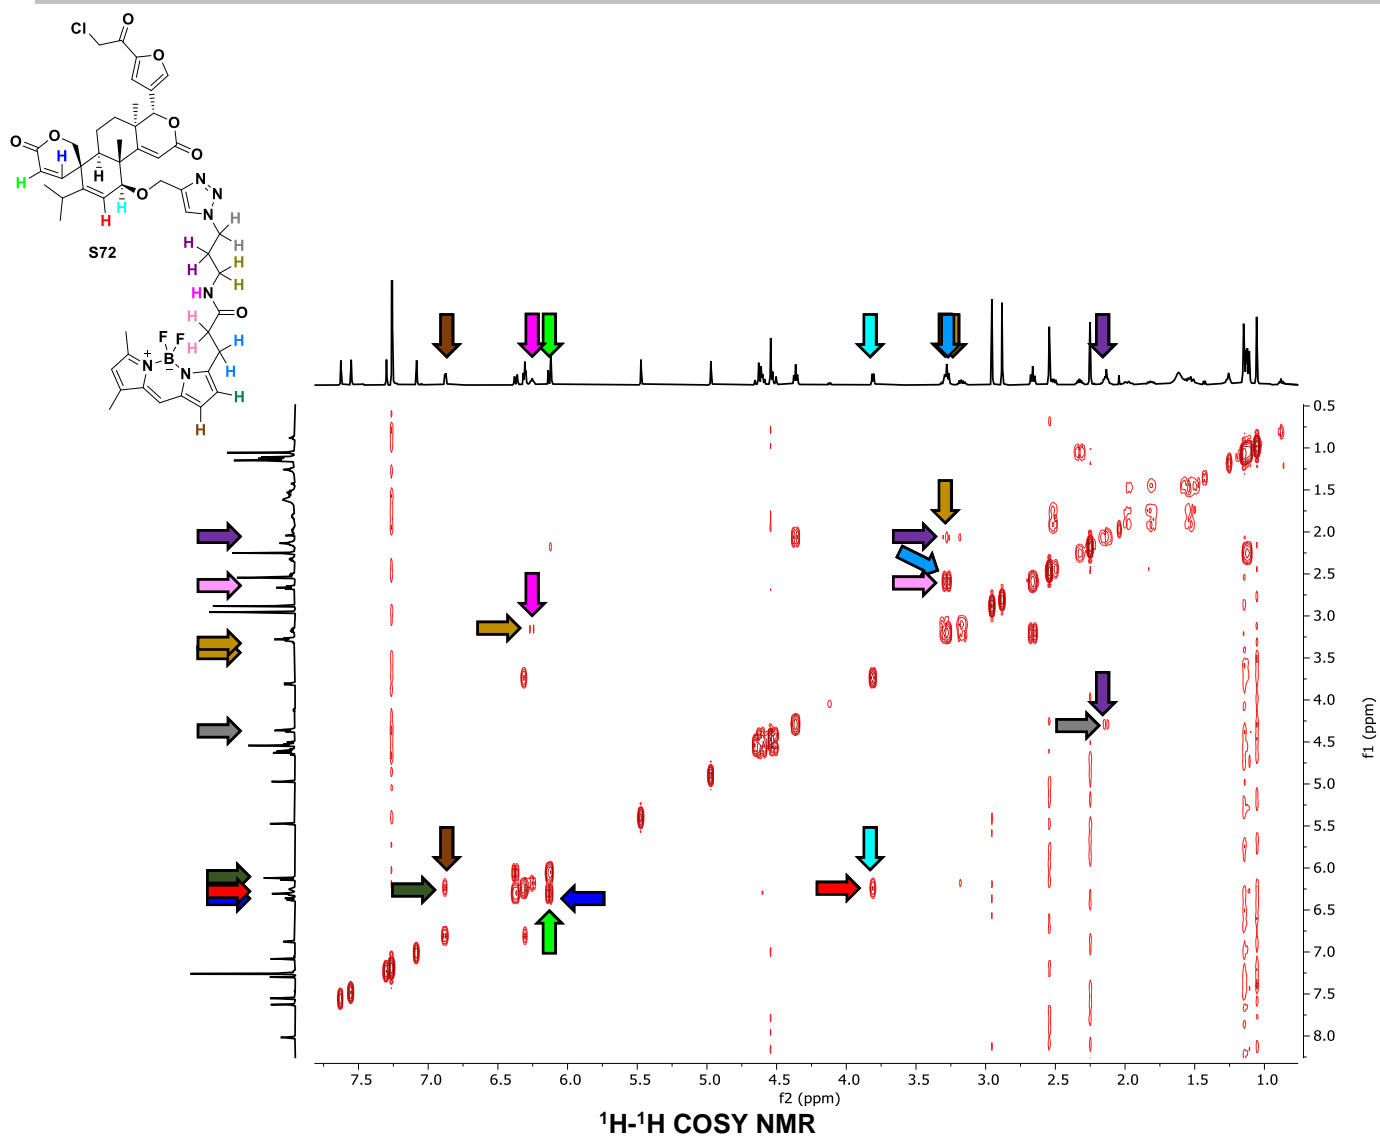

Supplement: NIHMS1703591-supplement-supinfo.pdf [file NIHMS1703591-supplement-supinfo.pdf]
